# Supplementary material for: Structural characterization ofPoria cocosoligosaccharides and their effects on the hepatic metabolome in high-fat diet-fed mice
Source: Royal Society of Chemistry journal article supplement (doi:10.1039/d2fo00638c), 2022-01-01
Supplement: d2fo00638c1.xlsx [file d2fo00638c1.xlsx]

## Sheet: primary data  
Supplementary Table 3. List of detected metabolites in liver tissues of mice from four experimental groups by HPLC-MS/MS analysis
ID	Name	HMDB ID	Molecular Formula	Primary tR(s)	tR(s)	m/z(Da)	NCD1	NCD2	NCD3	NCD4	NCD5	NCD6	NCD7	NCD8	HFD1	HFD2	HFD3	HFD4	HFD5	HFD6	HFD7	HFD8	NCDPCO1	NCDPCO2	NCDPCO3	NCDPCO4	NCDPCO5	NCDPCO6	NCDPCO7	NCDPCO8	HFDPCO1	HFDPCO2	HFDPCO3	HFDPCO4	HFDPCO5	HFDPCO6	HFDPCO7	HFDPCO8
RP2951	SM(d18:1/16:1(9Z))	HMDB0240613	C39H77N2O6P	735.845	735.845	701.561	0	0.943473	0	0	7.35828	15.0596	58.7182	56.2616	56.5869	47.5165	49.8685	76.6871	29.3647	54.1743	71.1571	37.6465	26.6116	61.5213	11.8409	237.296	67.0711	83.4281	58.225	54.3733	54.3289	63.3252	105.524	81.328	66.0454	68.9006	61.6519	79.1242
TN304	Glycohyocholic acid	HMDB0240607	C26H43NO6	395.957	395.957	488.296	81.8458	80.9821	72.3537	74.1653	70.5031	67.4908	72.9506	68.4209	71.17	70.1347	68.6364	68.8942	63.9871	64.8721	60.1809	62.2347	60.6658	58.2822	56.8152	59.9827	58.9406	55.8259	60.4842	61.9846	62.4455	59.2018	60.409	58.3455	59.6922	58.0684	57.5932	60.7885
TN2703	LysoPS(18:0/0:0)	HMDB0240606	C24H48NO9P	1016.69	1016.69	548.298	457.5	390.709	525.09	467.318	494.241	475.642	536.432	482.41	467.065	458.722	401.613	402.422	266.135	409.178	371.473	375.821	364.591	395.03	339.017	409.259	387.751	353.797	342.785	287.901	418.801	389.877	440.487	377.182	425.487	444.923	416.5	383.723
RP2185	LysoPS(16:0/0:0)	HMDB0240605	C22H44NO9P	856.411	856.411	536.243	285.669	156.221	333.16	285.502	303.572	344.025	370.257	316.221	337.635	298.141	213.534	310.639	330.277	291.489	290.813	335.227	323.111	338.019	404.228	413.358	328.567	266.638	324.266	261.349	298.734	281.107	336.598	211.964	274.794	268.601	280.616	227.291
RP1306	LysoPS(18:2(9Z,12Z)/0:0)	HMDB0240604	C24H44NO9P	640.029	640.029	539.314	878.873	640.606	862.866	654.149	771.774	583.929	617.061	563.528	701.263	720.835	791.341	761.286	802.029	862.313	821.434	907.464	757.789	698.371	736.226	858.598	889.321	840.313	947.571	833.675	890.642	942.847	869.849	709.241	785.512	736.723	795.098	649.149
RP1477	LysoPS(18:1(9Z)/0:0)	HMDB0240603	C24H46NO9P	708.704	708.704	524.299	248.523	237.609	247.548	265.194	246.309	264.446	276.551	257.907	302.997	304.813	342.248	329.01	331.495	301.213	302.699	298.823	236.672	229.769	242.64	249.951	229.341	275.901	282.483	271.505	257.976	250.412	271.936	242.116	244.267	272.055	260.705	240.255
RP1485	LysoPG(18:1(9Z)/0:0)	HMDB0240602	C24H47O9P	311.005	311.005	511.301	107.495	109.478	101.462	104.113	106.353	97.4566	104.762	106.988	98.2727	104.525	101.767	98.2615	102.368	105.78	105.001	101.297	96.2812	104.413	101.715	106.465	110.697	108.325	108.231	119.872	102.636	109.062	105.5	107.03	119.029	102.323	134.375	111.585
RP8	LysoPG(16:0/0:0)	HMDB0240601	C22H45O9P	814.351	814.351	507.272	1318.86	678.396	1302.62	1316.19	1325.82	1131.92	1058	1345.48	874.006	806.605	787.057	1019.24	798.2	1055.36	769.713	1085.47	291.715	219.9	342.319	259.161	244.799	128.428	84.3722	135.852	147.2	126.593	80.8718	51.8118	60.861	95.854	99.9737	52.6121
RP893	LysoPG(18:2(9Z,12Z)/0:0)	HMDB0240600	C24H45O9P	855.813	855.813	509.285	358.439	152.302	503.091	355.835	400.299	519.148	592.591	439.645	550.451	375.93	248.531	396.997	472.565	392.576	375.88	506.344	676.884	690.969	912.094	833.663	680.395	438.09	550.36	429.532	533.409	490.864	676.346	287.238	408.501	517.709	496.802	395.131
RP463	LysoPE(P-18:1(9Z)/0:0)	HMDB0240599	C23H46NO6P	857.009	857.009	464.313	511.856	280.107	649.263	522.899	529.066	666.668	705.042	610.411	648.597	512.817	390.388	515.549	606.559	465.46	489.189	579.815	884.631	925.531	1176.68	1214.1	1030.67	626.938	830.675	754.074	822.017	827.825	1068.58	541.945	746.583	827.186	803.922	579.31
RP822	LysoPE(P-18:0/0:0)	HMDB0240598	C23H48NO6P	560.07	560.07	466.328	41.5128	246.232	62.3947	226.216	200.581	239.038	306.34	237.784	266.87	282.56	222.873	176.726	235.869	373.849	175.547	156.393	290.671	283.291	419.376	650.299	484.92	467.461	204.085	330.279	277.418	458.116	478.978	644.515	163.636	448.085	399.14	439.667
RP51	LysoPI(18:2(9Z,12Z)/0:0)	HMDB0240597	C27H49O12P	675.973	675.973	619.286	176.206	114.034	126.541	139.46	125.764	97.8603	141.545	127.767	105.299	98.73	93.4839	105.891	104.566	87.4079	79.2485	93.8522	31.4993	38.3523	9.19616	23.9923	24.5451	21.9008	19.7629	30.9314	21.7369	19.4923	12.2666	14.566	19.1055	19.6305	23.085	19.5108
RP1452	Oleoylcholine	HMDB0240596	C23H46NO2	666.571	666.571	368.351	192.892	215.097	152.566	242.563	160.069	262.339	175.867	240.854	267.036	94.5423	235.846	250.295	152.243	105.183	222.842	238.25	346.326	359.582	260.686	270.224	180.607	199.369	200.076	223.545	249.706	328.664	445.095	164.126	225.084	186.093	202.155	132.396
RP2713	N-Stearoyltaurine	HMDB0240595	C20H41NO4S	444.067	444.067	392.287	391.739	640.395	292.145	651.06	450.549	395.875	568.366	380.008	1079.93	424.15	1319.69	429.233	776.043	710.235	519.326	1124.34	530.575	310.797	728.308	652.615	786.296	648.797	705.748	461.318	2659.39	436.039	486.443	1327.98	1570.36	575.608	311.887	394.645
RP35	N-Palmitoyltaurine	HMDB0240594	C18H37NO4S	786.788	786.788	381.278	597.256	435.153	577.422	559.845	532.424	516.611	491.211	489.052	546.181	529.086	497.495	481.675	467.498	480.416	430.541	445.253	85.3435	99.9202	106.074	114.597	102.922	96.2981	91.7223	86.2193	61.1444	74.0469	75.6577	62.95	59.2865	60.1335	53.1481	70.9677
TN2333	Guanosine 2';-monophosphate	HMDB0240586	C10H14N5O8P	75.2565	75.2565	386.049	67.9468	43.6777	45.5153	45.4781	61.5008	61.1221	57.1514	51.1049	43.4296	32.8417	40.8391	45.6995	23.5262	43.9562	50.7527	83.2459	44.4762	50.8302	43.4996	33.1872	40.9018	28.5599	37.707	44.5515	44.3553	53.242	49.1776	45.6401	69.6684	84.1312	76.4075	100.512
RP1220	cis-4-Decenoylcarnitine	HMDB0240585	C17H31NO4	728.124	728.124	296.225	48.3915	113.431	75.9201	103.089	85.0166	78.3704	89.3206	95.9667	101.819	39.4967	43.6663	56.3192	55.0464	53.7576	35.3523	38.0294	41.6048	73.9734	92.0875	32.6791	67.424	74.1784	55.8303	85.1584	51.8594	45.9979	26.9989	37.2832	33.0743	37.0358	31.0868	34.8559
TN1899	(4E,15E)-Bilirubin	HMDB0240584	C33H36N4O6	763.883	763.883	585.264	94.1242	117.956	58.3755	74.7714	104.989	123.494	118.357	139.607	65.5818	80.3642	100.721	79.3312	43.9173	57.9408	69.9325	103.414	48.0463	63.9487	59.7813	64.5033	131.494	102.888	96.4575	67.0371	76.4283	98.3684	110.539	85.2202	89.1362	123.328	89.1873	123.88
TN1190	5alpha-Pregnan-3beta,20beta-diol 20-sulfate	HMDB0240580	C21H36O5S	330.108	330.108	383.229	49.3527	52.1923	45.3021	44.5784	48.5005	44.0635	49.4132	48.9675	49.6301	39.6633	47.0007	46.1807	32.2029	47.215	46.7992	47.6724	46.0051	42.8596	38.8853	42.0973	45.2366	45.6586	41.7218	43.0942	47.1817	45.2395	46.8579	44.5612	44.9941	42.5015	43.9986	43.2418
TN101	Urolithin a 3-sulfate	HMDB0240567	C13H8O7S	512.812	512.812	308.998	201.272	206.905	199.2	195.435	195.383	195.129	202.421	210.327	196.849	194.627	212.564	193.351	194.28	186.393	192.507	188.074	208.214	210.143	214.19	226.388	218.004	222.661	214.182	231.51	211.09	235.291	228.73	233.294	233.455	235.731	223.842	232.078
RP2925	Sulforaphane-glutathione	HMDB0240560	C16H28N4O7S3	132.897	132.897	485.119	266.242	411.014	386.119	404.213	302.381	234.758	265.006	222.613	173.498	295.787	329.929	364.734	409.898	378.045	449.513	346.529	367.77	227.625	274.661	231.192	329.621	636.579	364.729	357.525	243.272	261.6	147.169	266.485	184.094	309.737	321.675	316.968
RP2493	Sulforaphane-cysteine-glycine	HMDB0240559	C11H21N3O4S3	91.3973	91.3973	356.076	59.0751	76.1211	98.2579	107.666	96.8251	100.765	116.594	102.67	115.252	154.071	105.426	81.2491	87.0073	100.149	108.209	102.858	112.56	101.685	123.549	144.309	111.44	144.78	83.525	97.5813	95.3712	123.255	100.231	172.924	89.8104	98.6999	90.7504	87.546
RP1837	Piceid 4';-sulfate	HMDB0240554	C20H22O11S	73.2764	73.2764	509.052	33.0812	30.2421	16.1554	30.2154	23.9587	28.1429	27.7695	27.5077	40.1815	35.3034	26.5088	32.7639	25.8653	15.0607	29.6016	24.7667	32.1546	32.4045	35.0046	19.1165	24.7415	12.1703	28.1761	31.6659	35.3342	24.778	34.5574	32.4309	33.9511	42.1445	33.423	39.443
TN898	Iberin-cysteine-glycine	HMDB0240534	C10H19N3O4S3	138.171	138.171	342.06	63.429	39.7582	70.5508	42.82	62.8709	38.1955	55.9367	76.5718	106.242	70.0962	72.7911	31.0607	36.8523	66.6227	85.7658	117.315	109.396	74.8825	76.9855	140.961	91.1028	68.5883	82.7361	62.3153	68.852	80.3414	126.973	82.0713	80.621	193.564	124.331	123.737
TN2020	Homovanillyl alcohol sulfate	HMDB0240528	C9H12O6S	258.923	258.923	249.042	206.27	194.352	163.241	142.529	172.835	169.806	144.519	164.276	178.433	176.836	283.476	143.744	140.223	120.774	122.153	174.218	154.705	168.273	148.649	104.857	267.813	173.04	342.901	161.72	368.181	356.457	143.133	294.731	107.379	106.323	101.623	114.789
RP2599	Genistein 4';-glucuronide-7-sulfate	HMDB0240520	C21H18O14S	70.4143	70.4143	544.08	27.087	311.807	324.908	119.834	45.1534	31.88	97.56	100.301	32.3859	2018.44	461.895	39.3759	67.4401	626.912	153.068	49.464	28.1105	27.6453	24.7592	321.084	87.3198	1013.64	36.7639	61.9896	42.0496	36.3046	32.3828	31.3416	21.6089	117.348	38.3346	105.107
TN125	Gallic acid 3-sulfate	HMDB0240519	C7H6O8S	1234.41	1234.41	288.937	387.622	398.473	299.524	330.604	339.517	337.439	311.055	300.956	272.338	291.387	340.043	347.185	490.57	337.413	443.006	425.118	571.95	616.598	569.488	586.98	571.331	585.189	569.8	616.037	637.745	632.262	631.75	653.664	679.048	634.071	584.712	226.683
TN2371	Enterolactone 3';';-sulfate	HMDB0240506	C18H18O7S	73.6452	73.6452	401.07	55.4019	41.7479	79.7096	89.6793	91.4884	54.6411	117.416	89.6393	115.641	90.2939	114.46	43.0653	44.3932	69.3886	134.786	119.739	99.6275	68.5827	82.8562	110.32	90.4118	120.634	88.4326	92.1573	103.345	128.134	123.72	115.31	82.8847	80.671	70.4015	92.0478
TN1398	Dihydroresveratrol 3-sulfate	HMDB0240500	C14H14O6S	312.999	312.999	333.04	249.413	272.19	242.107	242.828	232.49	227.238	232.194	246.731	256.245	284.581	289.376	250.268	129.727	260.396	264.945	244.746	247.595	238.338	225.267	243.731	275.14	273.368	262.758	262.993	269.19	259.165	267.397	253.977	246.449	284.183	300.642	287.963
TN1835	2-Hydroxy-1,4-benzoxazin-3-one glucuronide	HMDB0240438	C14H15NO9	122.327	122.327	380.038	67.5091	65.0691	47.8492	58.7006	49.7497	68.3076	59.5785	61.4286	52.0998	67.2235	58.0782	56.6718	34.1928	65.4725	51.4124	53.8913	63.0664	52.7727	53.2611	58.7514	54.5572	53.1498	54.1007	60.6459	52.9076	50.1732	63.3624	50.2289	60.7615	62.7858	47.7919	55.7323
TN1078	HHPAA sulfate	HMDB0240380	C8H9NO6S	360.778	360.778	212.002	87.0313	38.4307	87.6484	109.403	79.9267	78.4556	70.3378	93.3993	29.782	104.192	82.1497	72.4931	17.5126	74.0165	82.9096	53.2893	58.6914	72.7696	109.903	104.975	78.7291	94.6662	30.5533	94.3302	30.868	34.3277	51.3028	70.8966	38.1565	57.6654	21.8555	40.5688
RP2990	Glycerophosphoglycerol	HMDB0240316	C6H15O8P	78.2773	78.2773	229.048	77.7593	56.6733	63.0494	50.7061	86.8362	144.045	42.8734	50.377	50.5658	42.2061	42.5646	54.8678	56.5577	50.8481	52.2305	52.8844	76.9843	107.571	106.662	57.5072	74.4466	49.3432	59.3737	76.1994	65.4045	74.2002	76.3882	57.0184	82.5007	40.4589	53.7124	43.9344
RP2757	Cytidine 3';-monophosphate	HMDB0240312	C9H14N3O8P	88.4779	88.4779	346.04	217.226	125.258	609.56	424.644	438.701	268.591	341.471	285.851	266.578	492.166	327.283	162.037	242.879	160.884	186.926	369.404	330.072	314.813	308.903	522.544	519.36	445.221	229.954	440.858	273.929	190.492	280.961	167.879	404.326	610.618	362.195	410.859
RP511	Succinylaminoimidazole carboxamide riboside	HMDB0240295	C13H18N4O9	603.011	603.011	392.139	46.1195	44.0364	50.6938	50.8729	50.3205	52.5319	47.6451	50.5703	40.9109	55.2808	42.2545	44.0773	37.9716	51.5455	39.9172	43.6743	44.5199	25.7433	38.9099	44.0843	34.0393	24.7598	34.7087	25.2814	34.8825	17.8192	37.7162	16.0489	27.1427	31.297	41.6589	35.5538
RP2355	2-O-Methylascorbic acid	HMDB0240294	C7H10O6	73.9215	73.9215	191.055	114.933	197.624	149.417	176.983	137.732	110.711	176.6	159.513	68.3893	159.87	153.16	66.7634	129.31	163.205	142.618	75.5561	76.1061	77.2635	70.9868	167.554	154.03	161.943	127.491	158.339	144.465	91.0512	80.5126	74.9621	67.6589	151.354	142.107	164.437
RP1600	Cisatracurium	HMDB0240286	C53H72N2O12	445.669	445.669	946.54	3.25595	1.59093	0.328527	8.31886	2.96338	1.798	3.77654	3.25447	24.8449	4.33699	63.8034	6.60824	27.5838	11.7926	7.11897	21.912	31.3318	6.02296	51.376	49.2272	43.1199	24.631	19.1169	34.2083	235.407	15.6977	17.647	102.789	95.1572	32.959	11.0054	11.9365
TN1972	Pamoic acid	HMDB0240282	C23H16O5	115.642	115.642	373.106	173.398	121.125	172.376	151.263	161.666	164.699	174.987	156.862	207.214	234.496	187.165	173.333	19.3002	241.44	216.276	307.16	196.927	120.185	146.434	140.632	205.318	118.612	174.22	115.756	197.995	165.075	113.038	102.834	201.716	200.325	96.0561	84.7693
RP3205	Kerdlan	HMDB0240277	C27H44N2O2	447.977	447.977	465.285	343.785	229.19	322.021	509.792	322.735	213.06	283.405	254.925	497.195	195.895	761.971	229.298	628.736	260.52	295.878	356.056	514.11	190.513	546.709	678.135	516.753	310.817	216.727	555.034	1129.88	239.588	214.528	535.841	538.821	353.483	198.773	214.493
RP2863	Pyrvinium	HMDB0240273	C26H28N3	315.42	315.42	400.258	29.1052	81.0838	77.7516	77.3715	78.7116	33.1113	82.4493	83.005	78.8747	81.6033	75.207	36.6247	82.2982	79.7617	84.4507	34.3696	40.1545	37.6792	54.8611	92.0314	93.5916	90.7856	94.1264	84.6614	85.1372	83.9636	40.9717	83.6515	82.798	93.9997	76.0554	46.0262
TN1381	Ergoloid	HMDB0240271	C29H37N5O5	487.116	487.116	574.25	48.2856	38.3918	24.1345	31.2104	25.4138	28.9931	39.4899	23.648	18.9296	20.2245	28.1797	23.663	16.0636	32.7382	18.9157	19.7206	29.8016	21.6727	22.748	21.6213	26.2232	24.3681	22.3378	18.6821	29.2999	18.0508	18.3589	19.7219	26.6203	20.5485	14.8365	24.1134
TN594	Ferrioxamine B	HMDB0240270	C25H45FeN6O8	765.894	765.894	636.264	134.238	155.993	142.506	153.958	162.152	152.973	151.703	165.432	154.427	159.334	145.524	160.72	137.744	152.541	147.812	130.336	109.594	131.554	123.38	115.182	125.936	131.896	131.133	126.804	117.44	121.027	118.984	151.256	155.597	127.91	120.221	151.061
TN2445	Hydroquinone sulfate	HMDB0240263	C6H6O5S	329.724	329.724	172.991	68.7591	29.2756	36.2677	157.544	45.7781	36.6942	64.2085	59.1098	29.8551	402.79	175.398	71.3469	27.684	109.943	80.3683	51.191	37.6299	74.6084	35.5288	205.41	58.1401	129.232	73.6266	39.5925	70.0608	35.1973	133.196	121.179	59.3882	186.318	119.178	63.1232
TN1551	LysoPC(0:0/16:0)	HMDB0240262	C24H50NO7P	382.91	382.91	534.308	59.0067	62.9619	59.9291	58.3283	58.5706	54.6738	55.0757	56.2673	59.6194	55.2859	62.2127	53.7463	37.6225	53.2747	54.7112	55.5311	50.3865	50.6539	49.8235	55.3985	54.19	48.1144	51.6107	49.7737	57.6719	55.8731	57.5568	56.5331	59.5209	58.621	52.1211	48.0015
RP211	LysoPI(18:0/0:0)	HMDB0240261	C27H53O12P	886.517	886.517	601.335	6.27437	10.4952	11.2839	12.6003	15.1868	13.048	10.4102	15.2031	11.9456	13.6201	9.06448	11.2659	11.7589	6.92724	8.23438	9.34634	638.654	742.581	800.984	984.344	817.639	736.032	778.569	922.186	732.417	686.097	850.072	916.283	697.073	729.179	919.676	849.226
TN187	LysoPI(20:0/0:0)	HMDB0240260	C29H57O12P	901.375	901.375	667.313	1.92667	27.4985	15.2298	19.6242	14.7362	16.3839	14.3977	15.4334	16.9336	24.74	21.6415	27.3497	41.5678	18.005	51.4052	35.3185	91.9437	93.9594	98.1612	82.1546	89.5793	108.403	82.0807	86.1005	106.192	107.94	106.019	121.306	92.6122	84.3364	121.27	97.3796
TN990	Salicyluric beta-D-glucuronide	HMDB0240252	C15H17NO10	74.1983	74.1983	394.073	49.475	47.2691	45.8549	41.4958	51.6281	55.6723	45.3592	44.2988	39.3947	40.128	34.5226	56.1089	18.7593	40.8329	46.1274	42.1164	46.1715	60.4032	52.0277	63.1692	53.6936	50.3307	52.8911	62.4671	51.2801	46.2379	46.1874	51.526	54.1922	67.8807	65.149	84.026
RP2787	Pyrrobutamine	HMDB0240248	C20H22ClN	253.202	253.202	350.107	50.2892	52.5078	136.407	79.0879	96.9508	84.4035	69.7965	72.7183	104.835	154.573	98.2755	44.6367	93.4822	87.3683	128.241	89.6045	70.5587	64.5395	71.8687	146.88	107.369	140.566	103.367	87.3468	64.5549	62.3467	84.2445	80.6421	81.6083	130.463	135.574	106.978
TN2375	Temelastine	HMDB0240244	C21H24BrN5O	73.7281	73.7281	480.09	45.7283	54.2002	50.4513	53.8467	46.0685	64.9592	50.6118	57.9084	58.0939	47.7736	56.1063	52.4623	17.6622	65.7963	74.0923	57.1032	53.84	42.1324	29.8124	95.0421	59.1961	56.3534	44.6499	54.4714	55.3871	59.9463	69.641	47.1663	64.4698	80.969	57.2844	68.8523
TN2256	Mebhydrolin	HMDB0240237	C19H20N2	474.522	474.522	241.152	54.7657	58.2585	47.9426	47.5749	55.6424	59.7867	52.8612	47.313	53.7428	55.3306	50.8461	65.4965	49.4007	55.5173	53.2681	49.3633	49.262	45.2628	46.2466	51.0124	55.4368	52.8543	45.1663	51.2788	44.4662	62.192	55.8104	53.7906	75.204	57.4039	57.6948	56.582
TN1577	Bilastine	HMDB0240232	C28H37N3O3	517.056	517.056	464.299	75.3925	118.762	16.9222	155.673	64.094	27.828	172.138	63.15	58.0515	24.6427	85.0559	48.4838	30.8778	48.0334	19.4842	36.8163	47.1286	21.0747	27.6213	87.7182	48.0856	71.3845	53.4519	42.9687	171.931	17.7598	40.8002	105.272	103.244	47.305	11.2803	30.3846
RP520	Oxomemazine	HMDB0240230	C18H22N2O2S	846.058	846.058	331.145	157.221	123.913	134.913	143.173	134.42	138.428	144.918	136.079	96.2149	171.444	95.8444	128.339	98.8612	92.5879	83.8162	81.5331	69.3036	62.1648	77.0983	77.8651	65.7898	44.604	65.4158	87.2936	73.6634	49.9423	97.904	39.5157	77.3433	52.853	63.4222	47.9005
RP2752	Hydroxyethylpromethazine	HMDB0240229	C19H25N2OS	301.241	301.241	346.195	69.9952	53.026	95.9143	107.448	81.5094	49.5378	89.796	71.7516	97.2387	117.839	176.779	63.5173	92.5336	80.6176	88.0394	100.958	88.7551	75.7881	74.8275	133.948	120.023	108.139	136.777	105.542	132.369	113.502	109.15	76.2166	62.4869	102.873	109.349	94.4491
RP1420	Phenbenzamine	HMDB0240227	C17H22N2	516.908	516.908	272.213	79.4158	88.6964	83.7122	88.5838	110.924	114.748	134.434	123.772	131.005	143.243	147.011	102.481	111.384	118.689	106.511	133.95	118.599	119.862	115.615	122.331	174.959	164.366	124.366	153.481	124.872	104.251	112.438	190.178	116.753	167.951	115.731	124.077
TN580	3-[(1Z)-1-{4-[2-(dimethylamino)ethoxy]phenyl}-2-phenylbut-1-en-1-yl]phenol	HMDB0144318	C26H29NO2	1085.19	1085.19	388.238	57.8015	49.9587	63.9349	25.7046	117.546	150.745	93.1122	119.133	162.796	82.9317	135.573	164.82	47.9029	101.134	138.575	84.0256	50.9305	84.8268	57.7516	34.3538	37.1112	23.8458	61.2262	34.9052	84.0078	95.5939	99.9448	62.3611	98.7411	91.5012	84.6847	46.2898
TN255	4-(4-chloro-1-{4-[2-(dimethylamino)ethoxy]phenyl}-1-phenylbut-1-en-2-yl)phenol	HMDB0143639	C26H28ClNO2	1168.58	1168.58	404.186	24.4036	20.4978	30.1123	24.1709	27.3759	27.3072	23.2544	21.4786	22.4879	22.0415	18.261	21.1633	7.23816	18.4743	22.3209	22.99	6.83206	19.3109	19.0175	22.4206	14.4232	12.9939	19.1627	19.5895	4.23577	9.66089	20.7535	3.85968	8.22108	6.66608	2.46356	3.27255
RP776	2-(sulfooxy)pentanoic acid	HMDB0143268	C5H10O6S	155.072	155.072	216.054	386.622	328.613	391.494	377.198	345.2	330.94	333.047	347.444	427.575	525.533	494.565	443.401	417.15	456.035	433.795	415.189	423.572	415.38	441.144	566.078	607.587	553.126	518.86	488.066	464.029	454.048	525.659	585.308	552.001	642.488	566.768	510.68
RP2357	2-amino-6-hydroxyhexanoic acid	HMDB0142963	C6H13NO3	72.5088	72.5088	186.053	732.634	700.59	698.017	310.763	1024.06	1204.06	440.696	498.529	538.456	272.372	303.585	569.783	648.35	453.419	722.527	595.837	838.309	1006.45	670.569	399.743	588.013	495.696	377.2	821.693	417.823	684.86	426.21	633.2	348.755	310.143	373.01	349.192
TN142	4-[(1E)-1-{4-[2-(dimethylamino)ethoxy]phenyl}-2-phenylbut-1-en-1-yl]-2-methoxyphenol	HMDB0142532	C27H31NO3	1188.69	1188.69	382.218	23.1779	18.485	27.008	28.427	21.1502	30.6492	24.4261	29.4505	21.8196	17.8204	24.962	24.2674	10.3668	19.4758	16.7279	17.9728	1.86962	11.9504	23.4744	19.1037	14.8733	9.16275	12.8582	2.65311	1.46353	1.6496	1.85531	1.12777	1.5584	1.30769	1.31104	1.15111
RP55	4-[(1E)-1,2-diphenylbut-1-en-1-yl]phenol	HMDB0142434	C22H20O	680.174	680.174	339.115	42.4781	35.7062	47.0044	33.141	36.1821	43.5411	50.6765	51.1345	53.191	47.7124	50.8607	48.5257	51.2498	54.725	47.4159	47.3948	10.6909	12.5472	7.98596	6.75637	6.13447	10.2565	3.0186	8.1493	7.7698	8.70344	14.8519	11.8373	10.4772	10.1439	9.47246	12.2856
RP2316	2-{[hydroxy(2,3,4-trimethoxyphenyl)methylidene]amino}acetic acid	HMDB0142117	C12H15NO6	74.0657	74.0657	292.079	108.288	76.2487	119.703	139.197	122.08	106.4	114.585	132.948	149.776	43.7216	95.1201	106.78	102.26	101.22	100.867	114.797	133.174	101.549	156.777	56.0566	129.147	115.132	121.555	130.634	128.618	125.079	114.249	103.919	139.928	139.59	149.357	138.954
RP2148	2-[3,4-bis(2-hydroxyethoxy)phenyl]-5-hydroxy-7-(2-hydroxyethoxy)-3-{[3,4,5-trihydroxy-6-(hydroxymethyl)oxan-2-yl]oxy}-4H-chromen-4-one	HMDB0141965	C27H32O15	90.5588	90.5588	635.139	422.5	521.825	681.842	780.802	692.462	669.259	829.725	758.459	801.303	804.697	737.694	739.179	649.834	572.424	708.372	666.346	909.135	689.606	917.122	697.337	780.851	946.281	703.653	653.249	759.12	893.175	660.539	863.356	570.274	756.71	693.16	492.93
RP1456	6-{[6,7-dihydroxy-2-(4-hydroxyphenyl)-4-oxo-3,4-dihydro-2H-1-benzopyran-5-yl]oxy}-3,4,5-trihydroxyoxane-2-carboxylic acid	HMDB0141186	C21H20O12	74.5811	74.5811	503.058	34.7643	42.7771	34.8914	48.9249	47.0034	33.9313	47.4187	42.5292	41.9474	37.8367	52.403	49.9911	43.9983	33.1888	41.4942	43.4602	61.1109	35.9459	47.3926	44.2164	54.5313	53.6669	51.8236	51.7376	51.3665	41.2562	41.8942	56.5351	37.0923	51.6235	43.8291	50.4243
RP1223	4,6-dihydroxy-3-(3-oxo-1-phenylbutyl)-2H-chromen-2-one	HMDB0140987	C19H16O5	869.369	869.369	325.107	30.342	26.973	40.2696	35.0826	36.8358	35.8558	42.327	40.1583	36.8541	42.7107	22.9784	34.9254	31.8722	30.649	32.5723	38.4617	94.7359	82.3715	70.1697	57.3532	66.1989	54.8985	72.9599	58.9575	39.4177	39.2885	34.4481	34.1705	20.936	31.1634	25.5217	27.8505
TN1115	2-{[hydroxy(3-hydroxy-4-methoxyphenyl)methylidene]amino}acetic acid	HMDB0140926	C10H11NO5	101.171	101.171	264.028	83.6763	67.4939	72.8567	101.162	76.1675	59.82	79.7509	64.7207	70.6664	53.4638	79.4215	54.949	79.6972	64.7985	73.2612	60.1328	66.2111	53.307	61.6742	48.7363	73.1087	44.033	77.0352	56.6725	63.7432	69.9961	56.5956	64.9176	57.2085	84.3546	75.6459	52.424
RP2295	5-hydroxy-2-(4-hydroxy-3,5-dimethoxyphenyl)-4H-chromen-4-one	HMDB0140472	C17H14O6	181.899	181.899	353.039	66.3234	28.6394	164.362	112.722	111.753	187.433	244.132	320.798	232.287	440.66	106.543	107.478	52.039	93.6405	103.642	82.5478	74.955	177.501	170.229	265.475	116.761	55.2311	90.6696	78.9582	109.997	177.678	218.295	185.504	119.867	159.562	121.958	130.643
RP414	1-(2-hydroxy-4,6-dimethoxyphenyl)-3-(4-methoxyphenyl)propan-1-one	HMDB0140276	C18H20O5	872.187	872.187	339.121	16.1921	24.1248	25.0872	19.5667	24.5162	23.7541	26.3174	24.6858	30.5673	26.1871	28.2444	23.5318	29.5664	23.9302	24.2681	30.4456	93.6501	137.53	144.061	151.44	158.59	134.348	109.926	183.313	108.498	105.335	122.814	134.053	78.1435	85.3846	125.512	117.779
RP109	N-[2-hydroxy-2-(4-methoxyphenyl)ethyl]-3-phenylpropanimidic acid	HMDB0139464	C18H21NO3	679.602	679.602	338.117	84.7757	67.6998	97.5446	87.6181	84.933	83.2278	95.6176	95.3213	103.144	106.459	99.9101	98.753	102.67	97.2285	102.672	114.903	42.774	26.1134	26.109	16.8168	19.1697	24.7588	25.6319	23.1092	22.0465	26.6886	30.6843	31.8719	33.2397	35.372	29.6382	36.976
TN471	(4E)-6-hydroxy-1-(4-hydroxy-3-methoxyphenyl)tetradec-4-en-3-one	HMDB0137416	C21H32O4	966.626	966.626	349.237	2.61449	2.60762	2.71873	3.1115	2.22732	2.58727	2.57899	2.69252	2.16031	3.17078	2.29392	3.00084	1.93612	1.82949	1.81824	2.22533	2154.42	2544.78	8.58095	2.65968	3.44847	2.84183	6.52604	128.856	2449.15	2774.55	2351.46	2596.9	1775.75	2333.96	2487.9	908.025
RP3111	(4E)-1-(3,4-dihydroxy-5-methoxyphenyl)dec-4-en-3-one	HMDB0137254	C17H24O4	866.948	866.948	331.131	62.3748	73.598	95.0649	91.7148	84.337	88.5567	97.8659	97.2068	94.2798	97.2911	75.4485	81.4735	78.7799	72.0738	93.3324	70.6828	90.9576	123.09	162.325	188.405	159.232	116.247	157.406	189.679	110.957	65.7745	57.7547	64.1304	51.4649	58.6553	58.8003	64.371
RP1795	3-(2,3,4-trihydroxyphenyl)prop-2-enoic acid	HMDB0137166	C9H8O5	66.9826	66.9826	219.026	762.874	1030.25	1212.49	1171.43	914.039	678.129	1108.61	1047.8	827.183	1148.51	1052.26	898.276	871.457	1207.54	1051.11	929.611	773.892	383.459	402.443	1146.28	1070.9	1318.33	864.118	959.258	667.073	456.439	530.566	689.672	633.703	1200.93	896.987	1002.54
TN2582	2-[2,4-dihydroxy-3-(3-methylbut-2-en-1-yl)phenyl]-2-hydroxyacetic acid	HMDB0137142	C13H16O5	310.238	310.238	235.098	39.1775	41.1389	11.8857	23.3898	9.92577	27.5179	31.1833	29.2754	27.0365	13.9679	12.5881	30.0096	25.4292	8.68291	8.11798	9.79917	30.4677	33.9824	26.4133	16.7192	13.8544	9.93096	11.6381	10.0165	25.8947	14.627	11.7833	9.53458	11.0668	25.4989	15.4951	16.0948
RP2275	4-(hydroxymethyl)-2-oxo-2H-chromen-7-yl acetate	HMDB0136751	C12H10O5	269.052	269.052	252.087	40.9764	50.573	51.8011	62.3144	63.6805	50.8548	58.3771	72.8714	57.1401	79.0888	91.972	42.4944	72.9015	64.2859	67.0353	77.1973	111.339	53.6642	58.1962	64.8538	89.2013	100.221	62.6165	55.5803	84.0878	91.1978	56.8765	90.854	89.8004	93.8189	95.7474	80.309
RP528	5-[(6-hydroxy-3,7-dimethylocta-2,7-dien-1-yl)oxy]-7-methoxy-2H-chromen-2-one	HMDB0136701	C20H24O5	504.646	504.646	367.151	148.128	137.9	122.36	128.913	133.006	129.278	127.836	123.104	119.632	115.487	122.428	133.74	118.612	127.415	118.839	120.064	133.748	124.956	97.6449	90.9012	102.157	96.0819	94.7028	104.182	89.0082	89.3796	93.3046	91.7362	85.6272	94.0582	88.3287	89.8391
RP2519	3-[3,4-dihydroxy-5-(3-methylbut-2-en-1-yl)phenyl]prop-2-enoic acid	HMDB0135894	C14H16O4	239.648	239.648	271.094	49.1997	34.4207	45.6549	51.236	41.2834	40.3456	39.5756	37.4317	46.92	35.6459	52.7054	64.5751	61.2926	38.7858	37.3412	44.9705	54.4908	75.9159	55.4291	34.3698	43.0444	48.7101	74.1476	59.0685	45.3565	45.8592	53.7764	25.4945	42.3198	45.6073	50.8274	49.8887
TN93	3-[4-hydroxy-3-(4-hydroxy-3-methylbut-2-en-1-yl)phenyl]prop-2-enoic acid	HMDB0135890	C14H16O4	627.982	627.982	249.112	45.6614	44.39	38.3511	40.6622	39.2754	39.4428	41.1985	37.7164	39.9753	37.7119	38.1982	36.9149	36.0028	33.9127	33.4566	30.9537	26.3485	26.8326	26.1359	26.8692	25.444	25.6863	27.7902	25.9925	27.4216	27.3282	28.1944	24.5498	26.4418	29.9861	26.9595	26.406
RP2189	6-{[1-(7-chloro-3,5,6,8-tetramethoxy-4-oxo-4H-chromen-2-yl)-3-methoxy-4-oxocyclohexa-2,5-dien-1-yl]oxy}-3,4,5-trihydroxyoxane-2-carboxylic acid	HMDB0135847	C26H27ClO15	131.385	131.385	632.137	78.0339	87.0109	104.414	126.533	86.1771	43.5026	38.6131	18.3405	25.2838	57.1417	56.3408	95.2968	113.455	108.354	103.218	107.064	99.5095	39.7961	27.3144	45.104	81.6392	193.866	138.044	135.463	89.6013	67.8003	19.5007	48.8766	44.2421	150.425	164.154	128.002
RP1373	7-chloro-2-(3-hydroxy-4-methoxyphenyl)-3,5,6,8-tetramethoxy-4H-chromen-4-one	HMDB0135839	C20H19ClO8	283.553	283.553	440.113	142.893	131.454	164.121	168.552	147.468	160.965	173.784	169.308	201.551	172.365	171.735	170.5	152.04	170.887	174.52	192.915	155.92	149.813	196.245	164.613	159.127	157.408	145.466	131.276	159.24	158.924	158.968	153.599	121.252	156.525	142.854	132.344
TN918	2-hydroxy-2-(4-hydroxyphenyl)ethyl 3-(4-hydroxy-3-methoxyphenyl)prop-2-enoate	HMDB0135786	C18H18O6	74.641	74.641	369.071	597.035	408.123	608.861	818.245	573.151	868.777	737.693	700.477	752.49	585.394	732.184	568.653	348.134	485.679	772.209	843.43	1177.59	1149.75	905.07	910.264	574.428	916.125	750.624	866.215	826.309	1057.55	1448.42	808.093	1338.92	858.128	712.811	1171.91
RP1280	4-(3-hydroxybutyl)-2-methoxyphenol	HMDB0135672	C11H16O3	381.775	381.775	197.117	98.7119	170.075	101.902	213.224	145.836	177.221	130.561	110.251	286.4	304.956	343.015	420.828	291.617	300.138	250.121	308.053	225.565	91.4897	150.716	821.813	281.61	278.8	92.3103	155.565	328.604	371.616	257.328	355.443	480.042	401.49	304.695	283.158
TN1586	2-amino-4-({1-[(carboxymethyl)-C-hydroxycarbonimidoyl]-2-{[1-(4-methoxyphenyl)-3-oxopropyl]sulfanyl}ethyl}-C-hydroxycarbonimidoyl)butanoic acid	HMDB0135654	C20H27N3O8S	75.961	75.961	508.119	28.5735	286.011	195.64	200.769	66.8157	36.2629	138.883	143.759	48.4281	228.603	235.648	49.7229	95.7012	338.427	135.075	58.4611	46.3247	12.7796	20.6167	201.392	73.6588	295.298	31.6303	77.3504	66.3885	41.1834	42.2959	38.2313	45.0513	152.921	64.1566	182.359
RP2257	{3-[3-(4-methoxyphenyl)-3-oxopropyl]phenyl}oxidanesulfonic acid	HMDB0135637	C16H16O6S	131.774	131.774	319.064	77.8328	108.416	82.1584	93.0347	72.2123	74.4116	81.5985	50.7609	60.6893	88.0762	103.358	107.797	102.755	84.193	101.381	77.8486	91.8682	39.2716	57.8675	72.1518	75.3406	131.115	67.5188	77.8082	64.5574	44.9464	36.3262	83.5787	47.0298	79.1502	69.5598	72.8636
RP2817	3,4,5-trihydroxy-6-{5-methoxy-2-[(2E)-3-phenylprop-2-enoyl]phenoxy}oxane-2-carboxylic acid	HMDB0135623	C22H22O9	73.0632	73.0632	448.164	30.6831	365.219	390.297	246.361	68.7303	36.5308	164.475	148.584	41.2283	905.254	497.584	53.7634	88.6183	509.807	212.884	68.3839	38.4437	22.0314	28.3202	431.149	149.783	891.528	45.9174	124.094	42.0444	32.2729	22.3368	44.2631	29.8794	183.77	47.1224	229.778
TN1111	6-{[1-(2-{[2-(3,4-dimethoxyphenyl)ethyl]-C-hydroxycarbonimidoyl}ethyl)-3-methoxy-4-oxocyclohexa-2,5-dien-1-yl]oxy}-3,4,5-trihydroxyoxane-2-carboxylic acid	HMDB0135518	C26H33NO12	838.978	838.978	552.204	309.462	144.96	274.465	182.859	208.366	214.796	203.302	232.46	145.268	122.377	118.54	141.931	62.7569	121.075	127.321	133.482	161.494	223.312	325.721	400.855	294.729	201.061	254.108	246.396	165.274	166.369	247.605	101.02	190.471	152.438	185.931	211.456
TN1242	6-{[1-(2-{[3-(3,4-dimethoxyphenyl)-1-hydroxypropylidene]amino}ethyl)-3-methoxy-4-oxocyclohexa-2,5-dien-1-yl]oxy}-3,4,5-trihydroxyoxane-2-carboxylic acid	HMDB0135517	C26H33NO12	258.88	258.88	516.188	55.2766	61.4351	39.3271	34.8428	45.2851	41.3249	39.1303	33.1743	46.0823	37.77	51.1997	44.61	7.73798	49.4514	49.1704	40.2169	55.2484	35.2161	37.4943	39.2278	48.8197	53.0359	51.2903	48.2502	52.6462	65.0946	41.3707	50.9853	44.7255	60.65	50.387	54.1583
RP547	6-[5-(2-{[3-(3,4-dimethoxyphenyl)-1-hydroxyprop-2-en-1-ylidene]amino}ethyl)-2-methoxyphenoxy]-3,4,5-trihydroxyoxane-2-carboxylic acid	HMDB0135497	C26H31NO11	262.25	262.25	556.183	36.3121	40.5545	55.2191	58.0234	51.4718	42.4223	47.6227	53.2897	57.9407	60.4229	59.8973	51.7347	79.5487	65.8071	74.078	67.5204	85.7079	71.8983	73.6531	71.0562	80.6475	74.8488	91.2739	88.6489	104.207	89.7644	83.1058	88.7565	79.5612	104.854	127.979	110.14
TN964	3-(3,4-dimethoxyphenyl)-N-[2-(3,4-dimethoxyphenyl)-2-(sulfooxy)ethyl]prop-2-enimidic acid	HMDB0135488	C21H25NO9S	75.9366	75.9366	506.083	33.6305	34.3018	30.5414	26.9943	41.8835	22.4851	35.0998	41.9205	50.5735	25.801	35.8116	33.0106	14.4197	35.8131	37.7303	32.9923	33.4717	24.5599	37.1452	49.5052	39.7962	26.9186	44.9272	48.4278	40.1448	52.8243	44.8356	30.3656	35.9326	49.6581	50.6235	49.2758
RP1035	3-(3,4-dimethoxyphenyl)-N-[2-(3-hydroxy-4-methoxyphenyl)ethyl]propanimidic acid	HMDB0135482	C20H25NO5	620.603	620.603	382.163	146.994	134.259	197.356	190.241	200.599	165.053	199.801	178.183	135.164	173.072	143.479	151.09	147.613	166.773	140.071	148.59	142.157	138.001	153.314	179.258	175.934	140.733	143.914	161.542	149.508	125.29	131.339	91.8068	145.324	138.684	143.934	130.719
RP810	3-(3,4-dimethoxyphenyl)-N-[2-(3-hydroxy-4-methoxyphenyl)ethyl]prop-2-enimidic acid	HMDB0135472	C20H23NO5	603.317	603.317	380.147	81.2839	74.3916	113.977	94.8608	101.682	104.863	102.889	92.5199	82.4262	101.034	82.4367	90.4421	88.7442	90.9447	77.8902	102.558	91.2109	74.8193	95.3728	92.8385	78.8858	78.641	69.2536	77.2355	89.3163	74.9865	75.0588	40.8392	75.0121	91.6762	83.2593	65.5367
TN138	3-(3,4-dimethoxyphenyl)-N-[2-(3,4-dimethoxyphenyl)ethyl]propanimidic acid	HMDB0135465	C21H27NO5	1106.28	1106.28	356.189	39.2497	56.9059	50.1692	53.992	43.9019	52.4165	52.4488	51.8199	54.4594	50.7064	59.0623	51.4721	58.4977	45.0105	73.6046	49.0878	22.7449	33.5699	29.4226	30.8127	26.8434	36.312	31.317	31.4827	27.0691	32.6542	24.0826	21.8169	26.6085	20.6291	31.7592	37.8585
TN1404	3,4,5-trihydroxy-6-{3-[3-(3-hydroxyphenyl)propanoyl]phenoxy}oxane-2-carboxylic acid	HMDB0135457	C21H22O9	275.675	275.675	441.116	83.9379	60.8539	67.2628	61.1416	79.6516	63.5884	75.9075	63.8811	68.3554	66.1893	63.2126	57.2278	79.3763	56.6954	73.7518	55.0118	68.8067	62.2128	70.7105	59.6957	62.9626	54.2956	67.1647	54.3328	64.9083	64.7334	67.105	61.2397	56.1185	78.7419	68.7324	63.2177
TN2320	(2E)-1-(4-hydroxy-3-methoxyphenyl)-3-phenylprop-2-en-1-one	HMDB0135413	C16H14O3	173.411	173.411	237.091	59.5565	167.865	55.3574	62.1664	54.6811	150.183	43.9577	99.0296	77.7961	146.358	76.2692	191.13	9.45918	155.963	83.5315	145.023	89.2273	177.507	46.0472	140.285	43.9193	89.7689	97.3234	118.007	205.204	62.6924	226.432	104.4	125.175	281.677	81.8031	241.875
TN2775	{2-hydroxy-5-[(2E)-3-phenylprop-2-enoyl]phenyl}oxidanesulfonic acid	HMDB0135412	C15H12O6S	464.134	464.134	321.042	123.732	62.7455	132.037	142.374	228.007	145.664	145.574	127.863	345.774	284.98	405.754	285.417	196.374	622.488	1238.72	657.233	106.217	119.365	66.6117	132.142	158.733	157.552	70.7029	97.7759	490.03	505.808	382.672	755.075	466.39	310.332	319.758	254.015
TN2065	12-[6,11-dihydroxy-2-(hydroxymethyl)-2,5-dimethyl-10-oxo-3,4,5,10-tetrahydro-2H-1-oxa-5-azatetraphen-4-yl]-6,11-dihydroxy-2,2,5-trimethyl-5,10-dihydro-2H-1-oxa-5-azatetraphen-10-one	HMDB0135318	C38H34N2O9	73.5059	73.5059	701.189	22.8452	347.155	304.34	282.318	39.8631	31.9814	196.987	216.589	54.5317	1739.57	490.08	101.564	71.7986	765.759	263.924	118.965	29.7264	16.2664	14.1636	430.421	131.076	938.485	50.1484	110.584	44.5037	22.4762	20.4833	25.0392	36.7079	206.684	53.607	320.353
TN2399	2-amino-4-({1-[(carboxymethyl)-C-hydroxycarbonimidoyl]-2-{[1-(4-hydroxyphenyl)-3-oxopropyl]sulfanyl}ethyl}-C-hydroxycarbonimidoyl)butanoic acid	HMDB0135288	C19H25N3O8S	74.5348	74.5348	494.098	150.02	276.799	103.601	44.5675	165.413	95.8607	120.589	97.0913	145.038	33.5963	75.3481	100.339	60.2092	61.1714	130.375	97.326	61.7292	136.915	131.23	75.8982	103.423	21.0848	118.643	61.8438	148.139	130.329	118.172	109.121	67.6007	186.303	165.45	89.8456
RP3321	3,4,5-trihydroxy-6-[3-(2-hydroxy-2-phenylacetyl)phenoxy]oxane-2-carboxylic acid	HMDB0135206	C20H20O9	68.1956	68.1956	443.072	54.2947	129.916	120.454	82.7468	57.9051	59.5278	82.1567	80.2609	63.6926	458.515	138.865	71.415	62.7441	165.382	63.9114	67.5718	71.6436	67.6347	62.0661	128.873	92.7978	298.059	80.9285	89.1655	105.96	64.9554	76.286	58.7241	66.2986	98.2707	119.539	136.321
TN2474	[1-(3-hydroxyphenyl)-2-oxo-2-phenylethoxy]sulfonic acid	HMDB0135205	C14H12O6S	111.465	111.465	309.042	184.426	160.784	186.005	124.464	220.075	172.32	148.988	128.751	187.841	176.139	173.018	118.014	118.205	115.808	165.713	121.437	145.933	170.684	169.723	193.862	157.973	124.816	189.733	164.549	118.392	209.642	173.514	246.672	135.991	149.57	160.88	179.308
RP1551	3,4,5-trihydroxy-6-(2-hydroxy-1,2-diphenylethoxy)oxane-2-carboxylic acid	HMDB0135201	C20H22O8	74.2831	74.2831	429.095	280.287	249.139	253.479	351.155	290.8	248.637	399.394	254.715	314.269	205.537	246.244	267.08	236.411	254.392	284.212	339.488	506.262	316.011	329.203	228.823	300.077	338.976	381.771	370.997	531.315	503.115	335.476	346.161	133.233	191.493	237.399	276.245
RP1923	(2-oxo-1,2-diphenylethoxy)sulfonic acid	HMDB0135190	C14H12O5S	565.198	565.198	331.002	41.3766	29.7182	28.9555	25.3245	24.8233	24.7553	23.4522	21.2437	24.9404	25.075	22.9136	25.3256	24.0011	24.0458	21.7202	21.8861	24.8299	22.1587	24.4049	29.4657	19.6017	32.1765	31.6484	20.2326	36.4421	27.9823	32.23	53.0647	30.4047	29.5129	35.0853	29.2895
TN1400	3,4,5-trihydroxy-6-(2-oxo-1,2-diphenylethoxy)oxane-2-carboxylic acid	HMDB0135189	C20H20O8	73.7315	73.7315	427.078	226.262	258.084	167.664	273.546	181.391	167.697	234.974	186.002	246.627	140.877	208.506	222.184	84.7752	177.689	235.941	233.287	452.811	177.995	250.666	218.542	276.295	328.604	236.549	269.061	284.902	409.347	302.713	252.056	160.818	221.624	207.766	267.326
TN2742	1,2-diphenylethane-1,2-diol	HMDB0135186	C14H14O2	236.961	236.961	237.088	35.8927	31.4169	53.3463	52.0088	44.3423	25.6301	46.2838	31.6493	40.4774	49.3838	47.8635	25.5788	10.5865	35.3528	39.1199	37.2902	41.5458	41.8746	30.8625	61.4961	47.6028	47.1243	46.6504	41.9479	45.4268	62.1276	50.4371	49.2772	30.922	40.0074	29.2691	32.1393
RP1671	8-[1-(2,4-dihydroxyphenyl)-2-hydroxy-3-(4-hydroxy-3-methoxyphenyl)propyl]-2-(3-hydroxyphenyl)-3,4-dihydro-2H-1-benzopyran-3,5,7-triol	HMDB0135128	C31H30O10	601.858	601.858	580.216	109.451	59.716	60.4557	51.7397	62.7939	41.3409	65.9514	55.4312	54.2622	60.3589	69.9423	57.7459	122.611	55.28	55.6679	62.512	52.8938	46.7576	52.238	49.7502	46.7567	48.9699	59.9552	46.0971	55.2907	48.1484	62.4532	31.1504	45.4674	51.9982	44.5465	43.0859
TN1990	(5-{3,7-dihydroxy-4-[3,5,7-trihydroxy-2-(3-hydroxyphenyl)-3,4-dihydro-2H-1-benzopyran-8-yl]-3,4-dihydro-2H-1-benzopyran-2-yl}-2-hydroxyphenyl)oxidanesulfonic acid	HMDB0135106	C30H26O13S	139.135	139.135	665.066	117.84	153.753	152.607	123.3	144.684	79.5427	145.01	78.0539	156.679	95.0042	144.537	89.7351	102.82	116.867	178.758	105.763	157.79	97.6213	187.142	161.545	170.214	217.973	152.942	123.904	74.739	157.151	93.8095	180.733	115.061	119.739	153.316	117.005
RP607	8-[3,7-dihydroxy-2-(3-hydroxyphenyl)-3,4-dihydro-2H-1-benzopyran-4-yl]-2-(4-hydroxy-3-methoxyphenyl)-3,4-dihydro-2H-1-benzopyran-3,5,7-triol	HMDB0135100	C31H28O10	264.84	264.84	578.199	63.5954	57.4705	74.1464	83.8185	77.9481	64.0137	73.4911	72.8911	81.1658	84.2711	87.3613	73.7557	82.9485	87.8971	76.8993	94.2112	97.7635	92.5278	88.2447	99.259	98.081	140.824	106.983	117.355	114.618	123.299	101.543	108.185	98.1034	112.148	127.575	108.616
TN1620	2-(3,4-dihydroxyphenyl)-8-[1-(2,4-dihydroxyphenyl)-2-hydroxy-3-(4-hydroxy-3-methoxyphenyl)propyl]-3,4-dihydro-2H-1-benzopyran-3,5,7-triol	HMDB0135087	C31H30O11	259.036	259.036	601.163	63.348	40.2291	47.6617	36.7716	45.0077	39.5937	49.3896	40.1245	62.2504	44.34	64.2814	49.6188	16.6967	37.5007	50.9072	48.8005	54.8727	46.7797	51.0903	35.681	58.8541	44.0685	65.2049	48.4999	63.2991	60.7846	41.9194	48.6215	48.5335	52.8631	56.2749	47.3385
TN1877	6-{2-[3-(3,4-dihydroxyphenyl)-1-[2-(3,4-dihydroxyphenyl)-3,5,7-trihydroxy-3,4-dihydro-2H-1-benzopyran-8-yl]-2-hydroxypropyl]-5-hydroxyphenoxy}-3,4,5-trihydroxyoxane-2-carboxylic acid	HMDB0135082	C36H36O17	550.691	550.691	741.203	45.5262	61.6273	22.4696	34.9966	30.3605	26.2436	51.4955	24.4193	72.8843	30.3768	30.1889	46.5244	20.7831	33.3584	32.8054	37.6629	24.8486	29.3612	28.5952	35.0191	45.3145	42.8549	29.5751	34.9967	37.1478	36.7886	28.8671	62.2898	73.6753	46.9831	15.8875	18.8574
RP2710	8-[3,7-dihydroxy-2-(4-hydroxy-3-methoxyphenyl)-3,4-dihydro-2H-1-benzopyran-4-yl]-2-(3,4-dihydroxyphenyl)-3,4-dihydro-2H-1-benzopyran-3,5,7-triol	HMDB0135076	C31H28O11	238.558	238.558	594.196	3.75644	188.356	352.824	131.805	13.1293	3.122	90.7048	68.9418	4.09913	586.255	560.277	20.3859	54.3405	495.322	212.437	20.1843	2.12841	1.81163	1.35476	358.671	85.8378	573.801	6.29601	46.0729	2.16152	2.52818	1.46965	3.31234	4.33289	85.9341	5.02554	119.815
TN2543	8-[1-(2,4-dihydroxyphenyl)-2-hydroxy-3-(3-hydroxyphenyl)propyl]-2-(3-hydroxyphenyl)-3,4-dihydro-2H-1-benzopyran-3,5,7-triol	HMDB0135067	C30H28O9	252.722	252.722	571.134	145.456	41.2501	51.3641	36.7399	72.9121	45.7138	63.4634	42.2741	25.5749	44.0973	40.311	26.1769	10.3374	44.8246	50.4379	38.4146	32.2939	31.4104	49.2771	63.9825	54.7754	51.7536	37.1178	43.9152	36.2994	39.5095	25.5888	29.1215	101.705	75.7436	74.9496	68.5829
TN1450	8-[1-(2,4-dihydroxyphenyl)-3-(3,4-dihydroxyphenyl)-2-hydroxypropyl]-2-(3-hydroxyphenyl)-3,4-dihydro-2H-1-benzopyran-3,5,7-triol	HMDB0135064	C30H28O10	83.5847	83.5847	587.133	61.6662	96.3696	160.677	137.146	100.551	105.215	109.834	141.498	170.113	374.868	174.063	91.8798	20.2461	238.793	224.012	227.261	107.924	125.864	70.976	200.247	87.8866	269.714	78.7592	99.931	127.334	109.573	120.135	80.7859	93.3916	142.458	81.9977	101.698
TN1892	2-(3,4-dihydroxyphenyl)-8-[1-(2,4-dihydroxyphenyl)-3-(3,4-dihydroxyphenyl)-2-hydroxypropyl]-3,4-dihydro-2H-1-benzopyran-3,5,7-triol	HMDB0135060	C30H28O11	73.0257	73.0257	529.158	9.9134	62.4721	54.7937	34.3346	17.4804	7.96125	37.3085	37.1968	16.2411	115.929	74.7545	15.7162	14.9548	84.2894	30.935	17.2409	14.8159	9.35192	8.6763	49.7236	33.938	85.9108	12.8229	21.8093	14.0439	10.7085	11.5366	15.0689	13.0447	45.4737	18.3516	46.7403
TN2666	[3-(4-{8-[3,7-dihydroxy-2-(3-hydroxyphenyl)-3,4-dihydro-2H-1-benzopyran-4-yl]-3,5,7-trihydroxy-2-(3-hydroxyphenyl)-3,4-dihydro-2H-1-benzopyran-6-yl}-3,7-dihydroxy-3,4-dihydro-2H-1-benzopyran-2-yl)phenyl]oxidanesulfonic acid	HMDB0135057	C45H38O16S	258.235	258.235	849.193	11.4266	12.8426	11.7819	7.39652	9.23727	7.29353	11.101	6.91018	8.1643	7.28727	12.9845	7.46827	3.64402	9.44923	11.8502	9.80893	7.73225	7.89664	9.31945	10.0236	10.0101	7.93092	9.17266	9.96574	14.0246	12.2569	8.11042	11.6585	8.38577	11.0977	11.8731	7.01675
TN665	8-[3,7-dihydroxy-2-(3-hydroxyphenyl)-3,4-dihydro-2H-1-benzopyran-4-yl]-6-[3,7-dihydroxy-2-(4-hydroxy-3-methoxyphenyl)-3,4-dihydro-2H-1-benzopyran-4-yl]-2-(3-hydroxyphenyl)-3,4-dihydro-2H-1-benzopyran-3,5,7-triol	HMDB0135032	C46H40O14	487.665	487.665	781.225	20.7918	23.445	15.104	20.081	14.5063	14.6736	19.7302	21.1133	23.6901	21.027	16.4217	18.2029	19.0629	19.0725	12.1799	24.7475	22.5883	17.2447	18.7644	13.9504	10.0642	13.4865	16.8151	11.6988	5.23286	18.3464	17.6346	17.21	12.5769	10.9565	13.6785	19.7138
RP3040	8-[3,7-dihydroxy-2-(3-hydroxyphenyl)-3,4-dihydro-2H-1-benzopyran-4-yl]-6-[2-(3,4-dihydroxyphenyl)-3,7-dihydroxy-3,4-dihydro-2H-1-benzopyran-4-yl]-2-(3-hydroxyphenyl)-3,4-dihydro-2H-1-benzopyran-3,5,7-triol	HMDB0134986	C45H38O14	79.0331	79.0331	803.229	12.4661	23.5478	36.9899	27.0986	17.226	8.90968	21.4439	18.037	12.0516	93.5177	41.3145	17.3869	22.1875	53.7695	26.1271	21.9374	13.6407	12.7746	14.2101	25.9185	23.8146	116.202	12.5497	27.6732	11.8352	10.3793	13.8071	15.9638	16.9832	18.1033	14.0834	31.7238
RP1720	3,4,5-trihydroxy-6-(4-hydroxy-1H-indole-3-carbonyloxy)oxane-2-carboxylic acid	HMDB0134950	C15H15NO9	75.7666	75.7666	371.109	1358.7	551.747	1365.48	1363.76	1741.13	1448.55	2334.79	1780.02	2093.76	1654.59	1463.67	1176.35	1468.9	1117.88	1612.98	1444.84	2119.16	2086.55	3073.79	1903	1546.47	1068.25	1703.38	1343.35	2093.32	1832.26	2759.52	1297.05	1998.66	2017.55	1808.36	1872.94
TN855	3,4,5-trihydroxy-6-(7-hydroxy-1H-indole-3-carbonyloxy)oxane-2-carboxylic acid	HMDB0134947	C15H15NO9	123.567	123.567	354.08	298.705	333.521	304.073	367.534	277.138	271.53	250.019	296.947	252.481	342.923	275.496	295.231	136.682	363.964	284.153	363.407	340.577	353.548	253.38	466.974	318.229	429.677	343.376	344.108	429.129	312.061	477.548	381.898	322.419	504.309	299.271	466.963
TN1516	3,4,5-trihydroxy-6-(1H-indole-3-carbonyloxy)oxane-2-carboxylic acid	HMDB0134938	C15H15NO8	126.266	126.266	360.068	98.7016	62.4582	171.135	66.7367	85.6348	55.8924	131.333	71.2951	96.1168	96.0258	91.6951	98.0257	18.6939	139.717	107.286	112.345	100.189	62.2102	136.57	87.0362	113.831	90.131	109.258	92.9914	126.772	76.4542	59.9211	132.779	272.908	147.07	166.473	272.434
RP2774	6-{[2-(4-{[3-({3,4-dihydroxy-4-[(1H-indole-3-carbonyloxy)methyl]oxolan-2-yl}oxy)-4,5-dihydroxy-6-(hydroxymethyl)oxan-2-yl]oxy}phenyl)-4-oxo-3,4-dihydro-2H-1-benzopyran-7-yl]oxy}-3,4,5-trihydroxyoxane-2-carboxylic acid	HMDB0134935	C41H43NO20	71.5528	71.5528	852.236	12.6209	63.7901	63.3684	49.009	19.2552	15.8269	40.071	36.9495	16.9143	201.794	76.0258	14.4514	20.2028	92.6736	44.0157	18.7592	13.2998	17.6962	12.0346	64.6384	27.8619	153.046	19.6499	25.8217	18.305	14.5709	10.3237	12.8151	14.1513	30.8477	11.6485	51.0611
TN2646	2,4,5-trihydroxy-5-(methylamino)-3,4-diphenylpentanoic acid	HMDB0134809	C18H21NO5	299.228	299.228	296.13	21.8515	32.1853	38.5403	46.2664	25.0611	17.6846	23.577	20.8031	18.0425	40.5064	29.2769	18.6395	6.0743	31.1745	23.8694	19.6877	30.7169	22.8319	20.212	48.7188	33.5324	39.1297	31.4114	29.2029	25.6507	28.7353	20.401	26.0457	17.3557	29.5309	29.9697	31.612
RP755	5,7-dihydroxy-3-[3-hydroxy-4-methoxy-5-(3-methylbut-2-en-1-yl)phenyl]-8-(3-methylbut-2-en-1-yl)-4H-chromen-4-one	HMDB0134743	C26H28O6	153.863	153.863	454.219	89.882	63.8389	99.8784	98.881	78.6992	73.2601	56.8754	65.6337	53.2862	107.666	97.23	114.292	103.456	92.6228	112.51	103.31	116.182	82.2129	94.3444	111.201	153.521	156.644	161.616	143.153	135.877	105.851	142.014	170.757	145.99	190.343	189.418	177.617
RP1412	[(3-oxo-1,7-diphenylhept-4-en-2-yl)oxy]sulfonic acid	HMDB0134652	C19H20O5S	73.6867	73.6867	399.067	66.3214	87.0716	87.9045	77.918	67.6412	63.9337	69.9384	71.3851	49.069	88.1023	61.1233	64.7415	55.9437	84.5127	54.928	59.0869	55.0786	48.7358	48.7304	59.6891	82.5716	68.1911	35.5562	71.1587	51.6941	35.048	42.484	59.2522	41.6372	65.6496	35.0646	66.4591
TN2109	3,4,5-trihydroxy-6-[(4-oxo-2-phenyl-4H-chromen-3-yl)oxy]oxane-2-carboxylic acid	HMDB0134551	C21H18O9	70.9254	70.9254	379.082	141.875	4916.8	4291.5	2669.62	475.195	164.998	1669.18	1766.81	214.149	11164.5	4750.6	493.552	461.097	6443.43	1789.63	496.682	139.999	40.6327	40.0401	4615.06	1053.49	9054.11	246.549	805.726	99.3845	53.311	74.3077	158.614	84.9158	1350.41	204.507	1635.94
TN2403	5-(4-{5-[(E)-2-[3-(3,5-dihydroxyphenyl)-6-hydroxy-2-phenyl-2,3-dihydro-1-benzofuran-4-yl]-1,2-dihydroxyethenyl]-2-phenyl-2,3-dihydro-1-benzofuran-3-yl}-6-hydroxy-2-phenyl-2,3-dihydro-1-benzofuran-3-yl)benzene-1,3-diol	HMDB0134544	C56H42O11	77.0672	77.0672	873.272	2.90516	58.7947	37.8654	24.3393	9.24612	8.7518	7.97856	12.4617	13.885	235.533	47.545	7.30492	4.43967	75.4088	26.372	11.5884	6.02464	3.53862	3.48102	45.0513	10.3341	199.892	1.85554	8.18147	4.94361	4.46865	8.97132	5.46811	5.72436	12.0856	4.1291	24.7821
RP3376	3,4,5-trihydroxy-6-[(14-hydroxy-3-methyl-1,7-dioxo-3,4,5,6,7,8,9,10-octahydro-1H-2-benzoxacyclotetradecin-16-yl)oxy]oxane-2-carboxylic acid	HMDB0134196	C24H30O11	548.628	548.628	495.181	96.1279	43.3871	136.865	121.631	103.034	64.7366	116.787	99.7133	113.919	192.082	113.247	118.08	101.769	163.447	117.37	138.248	112.133	90.2613	111.311	162.642	192.353	132.231	97.1334	105.492	130.184	109.988	164.123	62.2175	84.713	131.627	141.822	120.495
TN2309	6-[2,3-dihydroxy-5-({[4-hydroxy-6-(hydroxymethyl)-3,5-bis(3,4,5-trihydroxybenzoyloxy)oxan-2-yl]oxy}carbonyl)phenoxy]-3,4,5-trihydroxyoxane-2-carboxylic acid	HMDB0134176	C33H32O24	92.9447	92.9447	851.084	19.8605	31.3021	21.7701	25.792	21.2805	20.7382	25.793	13.9957	17.3863	51.9	24.5877	15.7367	4.07236	20.2268	28.8799	17.9201	22.7187	18.8299	25.1166	14.4372	18.6116	28.7814	23.3885	20.625	23.5352	17.2104	18.6141	22.4171	15.4735	18.3886	18.4586	21.52
RP1144	(2Z)-2-(phenylmethylidene)oct-7-enoic acid	HMDB0134151	C15H18O2	282.096	282.096	231.137	75.5871	48.0427	97.4389	107.846	69.9987	40.1608	121.046	80.5612	104.257	111.02	101.802	51.2966	77.6692	89.6077	78.4465	92.8827	105.089	64.1265	131.716	160.89	136.814	107.579	126.743	119.467	177.676	142.775	112	75.7304	128.279	119.535	140.949	117.498
RP1822	(2Z)-8-hydroxy-2-(phenylmethylidene)octanoic acid	HMDB0134149	C15H20O3	417.631	417.631	266.174	110.946	102.975	105.313	108.069	100.477	102.593	105.433	113.289	129.974	104.215	119.724	96.8178	100.462	95.5838	95.1968	129.799	115.154	109.593	106.03	101.217	110.3	120.113	115.472	115.924	123.664	97.8765	112.786	140.246	114.659	123.598	116.948	97.1616
TN720	2-amino-4-[(2-{[2-carboxy-2-hydroxy-1-(2-hydroxyphenyl)ethyl]sulfanyl}-1-[(carboxymethyl)-C-hydroxycarbonimidoyl]ethyl)-C-hydroxycarbonimidoyl]butanoic acid	HMDB0134092	C19H25N3O10S	303.668	303.668	470.127	58.864	40.7869	25.6688	28.1464	46.8032	47.0307	29.0454	29.7021	69.7814	32.5017	89.6237	60.3038	20.2396	35.9063	78.6504	61.453	58.7945	76.987	152.127	25.7638	61.8813	59.9966	51.7973	55.1472	80.5057	108.236	87.2054	94.4361	124.25	154.161	87.2617	122.798
TN2510	2-amino-4-({1-[(carboxymethyl)-C-hydroxycarbonimidoyl]-2-{[1-(2,5-dihydroxyphenyl)-3-oxopropyl]sulfanyl}ethyl}-C-hydroxycarbonimidoyl)butanoic acid	HMDB0134058	C19H25N3O9S	300.493	300.493	472.138	165.653	147.322	80.7937	210.231	42.6894	111.065	223.51	200.617	59.1629	151.437	124.861	154.835	18.727	193.141	45.9212	72.7974	196.638	56.0051	107.672	58.2628	127.482	162.56	154.104	171.676	112.218	60.3565	27.343	99.1029	186.596	130.39	97.5813	137.647
TN127	2-amino-4-({1-[(carboxymethyl)-C-hydroxycarbonimidoyl]-2-[(2-hydroxy-5-oxo-1,7-diphenylheptyl)sulfanyl]ethyl}-C-hydroxycarbonimidoyl)butanoic acid	HMDB0133948	C29H37N3O8S	840.78	840.78	588.238	137.145	83.3258	58.1458	78.0237	61.3068	121.137	76.2704	91.7055	93.5125	20.9802	95.69	41.0004	68.7625	104.364	50.331	76.3336	28.0474	27.2761	26.1743	7.05182	14.0328	18.9527	37.3154	34.8253	18.1593	30.1476	20.18	19.3817	18.787	16.7387	13.6149	14.6601
RP2393	6-[2-(1-carboxyethyl)-5-hydroxyphenoxy]-3,4,5-trihydroxyoxane-2-carboxylic acid	HMDB0133881	C15H18O10	69.2094	69.2094	381.078	430.912	9434.72	10062	5429.17	1370.3	473.285	4309.23	4166.78	733.078	23809.4	11541.9	1512.42	2061.31	13675.4	5135.75	1353.66	485.823	100.138	88.5603	10367.9	2918.19	19367.6	794.278	1927.04	386.203	155.58	346.374	483.922	222.409	3565.83	584.094	3317.6
TN5	2-amino-4-({1-[(carboxymethyl)-C-hydroxycarbonimidoyl]-2-[(1-hydroxy-3-oxo-1-phenylbutan-2-yl)sulfanyl]ethyl}-C-hydroxycarbonimidoyl)butanoic acid	HMDB0133763	C20H27N3O8S	518.339	518.339	508.116	3.91968	5.33387	4.52722	4.04852	4.65055	4.6713	5.13685	3.92605	2.99196	3.86634	5.53436	3.70008	2.87318	3.96878	4.25634	4.96425	17.5331	18.4815	17.2732	18.7801	18.3155	22.4428	18.4536	20.078	14.8423	17.6985	20.7959	20.241	15.5822	19.4649	18.7369	17.8892
RP1608	3,4,5-trihydroxy-6-{4-[(1E)-3-oxobut-1-en-1-yl]phenoxy}oxane-2-carboxylic acid	HMDB0133760	C16H18O8	628.396	628.396	356.132	477.195	441.618	568.119	534.327	530.395	446.845	490.292	440.532	397.206	422.13	346.686	355.7	361.374	391.039	324.881	360.195	449.876	396.869	434.589	506.863	540.353	375.746	365.125	448.549	399.692	355.091	404.414	270.503	370.257	403.152	380.429	402.431
TN2386	{[(3E)-2-oxo-4-phenylbut-3-en-1-yl]oxy}sulfonic acid	HMDB0133757	C10H10O5S	593.812	593.812	280.987	241.158	253.462	209.576	214.423	227.038	228.556	244.805	208.681	238.715	245.079	221.421	241.25	213.592	208.582	228.789	219.776	237.904	219.158	197.242	235.286	207.398	231.577	218.342	215.765	198.701	214.031	224.092	216.253	229.797	244.208	253.213	248.082
TN2167	(2-benzyl-3-oxobutoxy)sulfonic acid	HMDB0133706	C11H14O5S	133.49	133.49	259.063	46.1378	29.4274	49.2601	28.8352	45.2196	15.8139	44.9099	25.3484	35.3721	31.8594	42.6958	25.7488	19.5478	36.0299	53.0014	31.2198	53.8254	27.6397	44.9696	42.5485	55.4598	58.8569	50.5664	44.076	29.0552	29.5711	26.7782	31.3533	49.027	33.1685	39.2319	38.94
RP2672	3,4,5-trihydroxy-6-[3-(2-methyl-3-oxobut-1-en-1-yl)phenoxy]oxane-2-carboxylic acid	HMDB0133692	C17H20O8	282.659	282.659	335.113	46.4333	28.3973	41.2878	78.6371	40.0507	29.0378	50.0692	38.3376	93.2749	57.3141	75.7459	82.9799	48.503	70.9598	61.1889	67.8912	75.5021	44.6663	90.0994	62.081	58.0675	72.5207	40.4557	36.417	46.4073	59.6616	51.0312	70.7589	50.3397	38.3181	24.2688	25.139
RP3316	3,4,5-trihydroxy-6-{4-[(2,4,5,6-tetrahydroxy-3-oxo-2,3-dihydro-1-benzofuran-2-yl)methyl]phenoxy}oxane-2-carboxylic acid	HMDB0133558	C21H20O13	73.6185	73.6185	519.055	25.7448	19.8259	36.1734	45.085	40.9968	33.086	34.7627	28.8663	23.591	52.8283	40.7913	27.9253	33.0895	38.8717	35.817	26.504	28.7851	36.8243	27.0389	39.3045	27.0836	67.5237	41.9317	22.0703	26.602	37.9735	26.5826	27.7279	32.3708	30.8437	37.5593	30.3373
RP1204	4-(3-methoxyphenyl)butan-2-one	HMDB0133469	C11H14O2	589.856	589.856	179.106	210.804	223.698	200.488	196.892	197.741	207.375	205.164	206.671	224.182	220.737	219.008	210.071	222.722	213.604	222.398	221.248	217.02	195.624	229.25	235.738	226.933	236.709	236.073	223.149	213.728	231.818	225.138	229.557	236.891	202.605	214.218	217.845
TN1025	(2-phenyl-5H-chromen-5-ylidene)oxidanium	HMDB0133414	C15H11O2	141.335	141.335	205.065	24.5526	26.2111	51.9506	51.1792	43.0887	22.1436	48.0581	27.9572	32.9028	48.7556	45.4805	15.8912	7.325	37.3554	36.5746	30.2602	48.3478	35.1114	26.0031	87.4555	73.285	53.1967	63.9923	62.2037	58.3786	81.0057	51.4858	56.2612	38.6686	49.5233	60.7022	61.6842
TN2377	3,4,5-trihydroxy-6-{[7-hydroxy-2-(3-hydroxy-4-methoxyphenyl)-4-oxo-4H-chromen-6-yl]oxy}oxane-2-carboxylic acid	HMDB0133322	C22H20O12	132.02	132.02	499.079	60.4045	27.2186	93.3947	48.6576	106.311	45.5252	112.791	42.3711	144.084	44.7924	97.2038	29.1702	26.8699	35.3093	155.901	51.9261	60.9212	51.8823	112.329	83.7218	73.8677	69.0801	78.0399	62.4037	54.0723	92.0677	48.083	64.1118	79.8775	48.1783	63.6329	38.1892
TN1776	2-amino-4-{[2-({4-[5-(2-carboxy-2-hydroxyethyl)-2-hydroxyphenyl]-3-hydroxy-2-methylbutan-2-yl}sulfanyl)-1-[(carboxymethyl)-C-hydroxycarbonimidoyl]ethyl]-C-hydroxycarbonimidoyl}butanoic acid	HMDB0133280	C24H35N3O11S	97.6145	97.6145	612.149	1790.29	3400.15	2710.09	3701.76	2131.01	2653.18	2940.71	3454.22	2965.21	4362.62	3042.74	3268.25	4.50942	3988.94	3614.81	3312.23	3551.73	2765.9	2757	2849.32	1986.88	4282.69	2004.14	2219.02	2839.14	2856.69	2141.86	2097.3	1374.35	3138.67	935.661	1918.76
RP3438	2-hydroxy-3-[3-(4-hydroxy-3-methylbut-2-en-1-yl)-4-(sulfooxy)phenyl]propanoic acid	HMDB0133270	C14H18O8S	77.2851	77.2851	347.08	74.1001	88.4124	128.208	102.767	100.52	91.7609	134.611	102.337	133.161	168.001	127.648	86.7	92.3691	116.8	100.168	103.2	118.178	75.2562	117.137	148.867	125.92	110.304	76.9892	97.6479	114.663	103.907	121.873	130.53	124.392	111.679	92.1856	114.071
RP1277	2-benzylheptan-1-ol	HMDB0133179	C14H22O	777.721	777.721	207.173	54.7473	116.062	96.0798	109.196	119.561	134.142	136.777	133.966	132.859	137.225	123.485	140.415	113.957	141.698	136.551	108.957	233.48	259.577	257.444	212.245	178.36	179.031	230.645	179.096	173.968	186.543	160.039	176.845	108.43	119.437	130.611	139.891
RP2603	2-[(4-hydroxyphenyl)methyl]heptanal	HMDB0133166	C14H20O2	738.476	738.476	221.153	95.039	612.602	419.965	616.557	603.584	726.284	821.974	721.095	773.504	724.927	607.709	555.456	603.541	683.065	575.843	535.102	581.882	702.282	819.738	1026.25	825.168	835.681	625.258	764.585	835.225	742.321	669.514	794.738	453.742	527.288	527.442	630.609
TN951	3-phenyl-1-[2,4,6-trihydroxy-3,5-bis(3-methylbut-2-en-1-yl)phenyl]propan-1-one	HMDB0133050	C25H30O4	1141.8	1141.8	395.221	62.1385	38.3653	66.3804	62.5189	56.7778	69.74	67.9076	57.8575	63.1057	54.6891	74.2251	74.0678	46.9468	82.6357	91.06	78.8319	77.8029	91.6052	87.3347	74.8819	79.7041	69.34	68.3462	76.2824	81.5678	85.6054	96.4811	78.1937	90.5188	100.231	80.8011	92.299
RP707	(2E)-3-phenyl-1-[2,4,6-trihydroxy-3,5-bis(3-methylbut-2-en-1-yl)phenyl]prop-2-en-1-one	HMDB0133049	C25H28O4	283.033	283.033	410.231	104.06	98.824	104.49	109.832	99.259	97.626	108.517	104.192	110.021	107.425	125.638	109.493	113.195	148.531	110.236	105.587	121.267	126.291	129.083	124.682	134.384	144.421	149.171	144.212	124.798	123.616	127.308	122.53	134.309	155.617	157.003	135.926
RP2241	{[1-(4-methoxyphenyl)pentan-3-yl]oxy}sulfonic acid	HMDB0133010	C12H18O5S	115.178	115.178	313.051	158.835	116.642	128.4	136.01	172.796	124.243	173.375	127.446	114.968	171.086	152.368	165.677	148.546	91.571	165.189	169.214	193.513	113.216	147.637	168.242	211.067	167.22	160.944	148.467	153.048	105.832	118.912	118.979	160.139	52.9483	118.842	114.849
RP1165	1-(4-methoxyphenyl)pentan-3-ol	HMDB0132986	C12H18O2	393.044	393.044	212.164	23.2365	22.7591	20.7665	19.5259	17.2595	19.6078	21.7292	19.3636	21.6325	17.0094	22.8028	15.8947	16.899	18.6494	15.5637	21.6398	15.8893	16.8611	18.4293	14.3244	17.394	17.5483	15.3449	18.5524	20.5587	14.8378	16.8851	20.5966	19.1342	20.561	17.4391	14.0745
RP178	3,4,5-trihydroxy-6-{[1-(4-methoxyphenyl)-4-methylpent-1-en-3-yl]oxy}oxane-2-carboxylic acid	HMDB0132958	C19H26O8	650.187	650.187	383.168	22.2613	494.077	321.871	360.088	362.569	414.242	420.297	326.866	448.835	324.963	386.315	398.163	464.997	182.212	384.046	334.995	73.7626	82.6467	71.216	64.7667	71.2398	61.2257	60.8304	87.0668	69.8383	54.406	43.9539	45.7594	48.9654	38.8496	45.6705	47.8083
RP1779	1-(4-methoxyphenyl)-4-methylpentan-3-ol	HMDB0132947	C13H20O2	417.775	417.775	226.179	190.525	176.402	189.747	176.878	166.185	182.033	175.736	190.469	190.524	164.277	168.902	161.948	150.974	160.431	145.956	210.385	178.087	185.225	168.232	163.57	178.322	194.018	181.189	185.296	175.534	156.086	192.996	210.569	185.596	210.916	208.752	170.202
TN603	7-hydroxy-6-methoxy-3-phenyl-4H-chromen-4-one	HMDB0132856	C16H12O4	259.48	259.48	233.061	111.782	104.793	107.103	97.9953	108.987	97.9822	110.611	107.811	118.463	116.115	127.54	110.648	84.0055	109.77	113.455	112.715	116.781	106.094	114.272	100.739	124.095	120.915	140.419	120.297	136.569	130.731	119.881	112.218	123.565	126.522	130.593	126.834
TN1576	(2-{[5,7-dihydroxy-2-(3-hydroxyphenyl)-4-oxo-3,4-dihydro-2H-1-benzopyran-3-yl]oxy}-4-hydroxy-5-(hydroxymethyl)oxolan-3-yl)oxidanesulfonic acid	HMDB0132755	C20H20O13S	221.723	221.723	539.024	160.048	107.059	212.498	123.765	153.151	112.937	216.924	116.701	143.964	135.948	137.984	98.5643	66.2171	117.425	145.905	93.0753	91.9596	82.4135	97.1292	224.254	122.915	58.747	129.936	75.0357	75.0878	110.753	86.4291	110.786	129.125	232.364	149.283	128.369
RP2937	[3-(3-{[3,4-dihydroxy-5-(hydroxymethyl)oxolan-2-yl]oxy}-5,7-dihydroxy-4-oxo-3,4-dihydro-2H-1-benzopyran-2-yl)phenyl]oxidanesulfonic acid	HMDB0132752	C20H20O13S	71.1428	71.1428	539.023	268.536	299.997	191.683	92.4776	403.224	345.778	208.766	186.448	276.484	168.643	190.804	315.738	427.698	210.013	369.047	210.279	157.936	299.659	189.53	146.804	212.056	139.319	231.764	163.757	252.635	259.51	379.255	299.054	237.367	307.78	351.898	299.913
TN2174	6-[(3-{[3,4-dihydroxy-5-(hydroxymethyl)oxolan-2-yl]oxy}-2-(3,4-dihydroxyphenyl)-7-hydroxy-4-oxo-3,4-dihydro-2H-1-benzopyran-5-yl)oxy]-3,4,5-trihydroxyoxane-2-carboxylic acid	HMDB0132735	C26H28O17	138.363	138.363	651.096	105.14	117.05	152.91	109.795	132.032	67.1882	136.598	77.8128	161.047	84.0395	148.247	79.2604	104.653	94.1084	137.571	87.0512	122.852	70.7213	153.561	104.613	136.791	179.64	111.331	114.198	64.1396	119.963	66.9598	133.991	105.329	94.0026	137.597	78.3458
TN2782	6-[4-(3-{[3,4-dihydroxy-5-(hydroxymethyl)oxolan-2-yl]oxy}-5,7-dihydroxy-4-oxo-3,4-dihydro-2H-1-benzopyran-2-yl)-2-hydroxyphenoxy]-3,4,5-trihydroxyoxane-2-carboxylic acid	HMDB0132733	C26H28O17	95.6796	95.6796	651.098	95.7972	130.777	149.484	154.634	103.287	119.812	116.517	173.65	117.093	354.706	138.719	145.718	11.8541	207.586	134.484	148.3	167.894	154.879	140.573	213.02	112.608	148.943	105.838	135.113	224.052	112.057	120.731	114.552	101.669	178.648	88.456	121.31
TN902	2-amino-4-({1-[(carboxymethyl)-C-hydroxycarbonimidoyl]-2-{[1,3-dihydroxy-4-(7-methoxy-2-oxo-2H-chromen-8-yl)-2-methylbutan-2-yl]sulfanyl}ethyl}-C-hydroxycarbonimidoyl)butanoic acid	HMDB0132698	C25H33N3O11S	135.271	135.271	548.183	54.3479	44.6114	46.3388	54.5953	44.9461	44.4166	43.3935	49.2206	45.9804	77.9214	57.1197	47.9041	27.8421	69.7117	35.2723	63.1626	46.851	60.4053	41.8284	79.7146	64.201	62.0788	52.127	59.3876	103.367	58.9969	91.2565	78.2146	49.6223	104.52	64.1134	77.5664
TN2420	6-{[2-(2,4-dihydroxyphenyl)-5-hydroxy-6-(3-methylbut-1-en-1-yl)-3-(3-methylbut-2-en-1-yl)-4-oxo-4H-chromen-7-yl]oxy}-3,4,5-trihydroxyoxane-2-carboxylic acid	HMDB0132654	C31H34O12	82.4635	82.4635	637.166	21.8197	165.172	144.761	71.2816	29.0745	20.3382	42.9508	66.8345	37.4008	1064.06	244.668	54.8995	11.031	355.383	67.3625	46.7743	24.551	50.1178	25.4616	184.606	21.51	744.735	30.4436	23.7363	21.6499	33.42	16.0292	18.9905	17.443	71.6472	22.2768	29.4087
TN1723	3,4,5-trihydroxy-6-{3-hydroxy-4-[5-hydroxy-7-methoxy-6-(3-methylbut-1-en-1-yl)-3-(3-methylbut-2-en-1-yl)-4-oxo-4H-chromen-2-yl]phenoxy}oxane-2-carboxylic acid	HMDB0132648	C32H36O12	256.905	256.905	651.182	135.925	20.7108	23.4195	22.8626	18.474	20.1306	60.7522	25.0399	20.3656	26.8399	22.0936	24.4852	2.53486	26.6127	22.5663	22.8289	20.3999	32.4874	14.6353	24.7859	23.0005	22.2787	21.6711	24.1426	33.751	28.348	24.2705	24.2384	118.027	94.4296	83.7795	29.1912
TN1987	8-[5-(5,7-dihydroxy-4-oxo-4H-chromen-2-yl)-2-hydroxyphenyl]-5,7-dihydroxy-2-(4-hydroxy-3-methoxyphenyl)-4H-chromen-4-one	HMDB0132365	C31H20O11	73.192	73.192	551.098	52.1018	64.312	44.0024	29.475	46.8691	37.1663	37.6089	31.8366	51.7556	127.158	57.2434	51.1895	21.175	64.9	71.2889	39.9038	64.5072	36.0196	46.2958	42.9716	38.882	110.566	46.3177	60.1926	73.8112	84.6694	65.5399	62.4889	34.8806	55.8489	69.2265	72.7669
RP2505	3,4,5-trihydroxy-6-[2-hydroxy-5-(5,6,7-trihydroxy-4-oxo-4H-chromen-2-yl)phenoxy]oxane-2-carboxylic acid	HMDB0131943	C21H18O13	71.2378	71.2378	501.064	43.3313	193.01	177.336	209.802	88.9346	73.3902	100.615	107.571	62.1236	238.632	190.881	81.8312	112.541	256.244	115.834	41.8244	31.1545	55.3209	28.1726	183.126	77.7977	393.715	49.7305	56.1509	70.2078	54.5418	80.2178	74.9174	66.64	114.193	80.4892	93.3089
TN719	5,6,7-trihydroxy-8-(3-methylbut-2-en-1-yl)-4-phenyl-2H-chromen-2-one	HMDB0131487	C20H18O5	138.07	138.07	361.103	79.2726	80.1042	117.958	104.426	99.275	97.8284	94.2562	120.171	125.199	165.552	112.311	110.354	50.8591	140.047	124.648	155.434	113.881	145.427	108.019	177.693	131.889	106.738	179.856	126.731	196.083	146.826	185.592	148.596	118.528	255.68	176.292	199.322
TN1587	(2-hydroxyethoxy)sulfonic acid	HMDB0131295	C2H6O5S	71.2084	71.2084	106.984	12.0391	24.3224	9.97276	3.05519	15.5551	10.6111	8.54778	6.65879	13.1639	8.98831	8.9646	12.6176	11.5429	9.82821	13.6458	9.56995	4.66344	7.71701	7.4009	7.99806	7.4962	4.24738	9.48715	8.21675	11.3538	10.6566	12.5701	10.8264	14.2402	11.5896	12.1103	13.2047
RP3089	2-(hydroxymethyl)-3,5-dimethoxyphenol	HMDB0131233	C9H12O4	178.823	178.823	202.107	431.447	253.416	163.539	125.445	91.031	97.4496	218.088	208.096	609.957	223.498	361.86	274.836	329.382	143.23	207.964	146.562	125.313	317.627	813.989	257.232	259.717	234.939	162.085	166.254	163.349	313.647	620.505	287.658	294.491	257.602	274.254	121.843
RP3252	8-hydroxy-7-methoxy-3-(2-methylbut-3-en-2-yl)-2H-chromen-2-one	HMDB0131065	C15H16O4	315.457	315.457	278.138	41.8624	31.984	39.7074	30.0365	14.8168	24.5993	40.1587	41.2526	22.0149	9.9763	17.4505	45.272	27.7043	18.127	12.6401	23.9021	51.9528	53.6165	44.1742	44.6236	21.6702	11.8252	54.0491	29.3942	21.5836	24.2014	31.7224	10.1192	26.3114	13.9196	15.6908	13.082
TN913	{4-[(E)-2-(3,5-dimethoxyphenyl)ethenyl]phenyl}oxidanesulfonic acid	HMDB0130996	C16H16O6S	70.3327	70.3327	301.055	95.8193	80.009	56.9388	67.295	93.733	81.2525	63.0249	73.5662	77.6374	67.9582	80.7733	113.408	46.8	92.0597	91.1361	108.452	110.824	104.309	104.119	79.2109	106.807	91.491	82.7462	97.9953	101.326	123.329	97.3792	106.3	108.589	98.7266	96.438	102.235
RP1401	3-phenyl-1-(2,4,6-trihydroxy-3-methoxyphenyl)propan-1-one	HMDB0130930	C16H16O5	398.827	398.827	306.133	88.6502	306.696	249.458	175.654	257.689	129.786	192.838	117.489	132.392	111.202	102.361	107.116	96.415	110.09	92.5442	104.268	93.3978	89.3603	90.8101	98.3636	94.1481	93.4181	97.1885	95.5454	91.5127	89.4949	98.9948	95.957	98.9964	93.0606	94.1546	90.3351
RP3452	(7-hydroxy-5-methoxy-6,8-dimethyl-2-phenyl-3,4-dihydro-2H-1-benzopyran-4-yl)oxidanesulfonic acid	HMDB0130655	C18H20O7S	74.7077	74.7077	403.08	88.0121	36.8135	149.683	116.865	171.883	90.8487	197.827	121.633	185.603	150.877	151.737	40.2491	123.517	91.7663	191.729	185.446	132.003	132.816	125.129	138.155	99.9666	123.288	144.034	117.712	202.922	202.672	164.501	161.391	83.921	93.9319	99.1672	105.558
RP813	3,4,5-trihydroxy-6-[(4-hydroxy-5-methoxy-6,8-dimethyl-2-phenyl-3,4-dihydro-2H-1-benzopyran-7-yl)oxy]oxane-2-carboxylic acid	HMDB0130654	C24H28O10	856.582	856.582	494.204	76.8786	41.4769	67.1835	53.494	57.6217	70.8011	84.5499	55.3818	74.0686	63.3663	47.5018	64.178	74.4777	65.39	61.4468	72.7514	96.6447	82.2832	94.6135	110.201	83.0397	63.7585	83.9783	75.2915	91.784	81.4798	85.4436	68.4593	70.5328	72.0163	88.3385	71.2174
TN1603	[(7-hydroxy-5-methoxy-8-methyl-4-oxo-2-phenyl-3,4-dihydro-2H-1-benzopyran-6-yl)methoxy]sulfonic acid	HMDB0130646	C18H18O8S	487.601	487.601	377.067	215.429	53.2285	185.085	478.173	192.551	103.152	218.632	197.267	97.772	80.3864	153.45	96.3257	56.4016	256.558	205.415	115.468	236.974	173.787	68.4257	293.632	344.35	247.975	165.036	190.509	249.275	105.822	170.651	117.341	118.78	111.399	89.0856	180.376
TN2220	6-{3,5-dihydroxy-4-[3-(2-hydroxyphenyl)propanoyl]-2,6-dimethylphenoxy}-3,4,5-trihydroxyoxane-2-carboxylic acid	HMDB0130613	C23H26O11	312.258	312.258	501.135	64.7668	22.3489	27.823	39.9373	19.2495	26.4428	52.6791	38.23	49.8482	15.134	18.6625	77.3856	14.2407	38.9867	24.4218	53.1917	59.5254	54.6228	37.974	34.0414	26.8857	20.2468	37.5829	29.7362	33.0819	39.99	33.0779	18.3947	36.1231	11.5336	12.0605	8.89612
RP2140	(5,7-dihydroxy-6,8-dimethyl-2-phenyl-3,4-dihydro-2H-1-benzopyran-4-yl)oxidanesulfonic acid	HMDB0130599	C17H18O7S	283.803	283.803	349.075	83.5662	73.1406	90.35	90.787	85.482	129.447	103.974	86.6999	100.839	94.8516	93.6538	91.5512	92.5098	90.3283	132.61	96.6729	82.2893	83.073	145.272	88.448	76.23	86.2622	112.792	97.0003	80.5689	103.669	87.9553	127.641	72.9159	72.2856	80.3599	65.8194
RP2284	3,4,5-trihydroxy-6-{[5-hydroxy-2-(4-hydroxyphenyl)-6,8-dimethyl-4-oxo-3,4-dihydro-2H-1-benzopyran-7-yl]oxy}oxane-2-carboxylic acid	HMDB0130595	C23H24O11	231.959	231.959	515.093	13.2714	92.4935	182.682	103.894	38.8071	10.9649	66.3446	45.758	13.449	124.796	169.228	67.5206	81.155	138.792	131.764	33.8033	3.96627	2.06512	2.04902	124.043	87.1683	140.983	18.7182	70.6106	3.85708	2.96939	2.08104	4.3599	3.11855	118.006	16.7297	118.803
RP844	6-[4-(5,7-dihydroxy-6,8-dimethyl-4-oxo-3,4-dihydro-2H-1-benzopyran-2-yl)phenoxy]-3,4,5-trihydroxyoxane-2-carboxylic acid	HMDB0130593	C23H24O11	252.828	252.828	499.121	27.9942	34.7036	43.4541	43.9662	36.9454	26.8645	43.3907	31.3658	71.1173	49.9512	47.4487	41.9041	41.7146	46.8934	57.8865	76.6262	79.8333	61.9769	61.4201	44.6016	73.5235	84.9832	88.2473	45.0627	85.2262	86.2822	38.1916	75.9815	38.3329	91.6927	95.5647	49.665
TN2502	3,4,5-trihydroxy-6-[(6-hydroxy-7-methoxy-2-oxo-2H-chromen-8-yl)oxy]oxane-2-carboxylic acid	HMDB0130550	C16H16O11	68.4537	68.4537	349.062	68.986	139.992	138.099	164.411	108.125	65.6734	139.142	126.255	79.6702	149.494	162.523	91.4174	55.8448	187.838	136.142	97.9455	85.5183	67.4108	62.2238	184.648	134.374	174.761	81.5344	118.561	82.4701	70.8205	72.2176	81.6487	81.0701	148.279	91.4307	154.955
TN910	2-amino-4-({1-[(carboxymethyl)-C-hydroxycarbonimidoyl]-2-{[2,3-dihydroxy-1-(7-methoxy-2-oxo-2H-chromen-6-yl)-3-methylbutyl]sulfanyl}ethyl}-C-hydroxycarbonimidoyl)butanoic acid	HMDB0130525	C25H33N3O11S	258.665	258.665	584.183	34.6777	40.884	36.3291	28.0652	32.9441	27.2679	34.9314	30.1326	44.0695	32.3792	46.1016	34.9754	9.19217	29.8327	39.9355	37.6642	41.0623	33.2685	31.8544	35.7029	43.7493	36.6192	43.7558	41.4312	45.6002	42.5421	34.6007	39.3935	40.6885	40.4779	50.0521	42.0714
TN1998	2-amino-4-({1-[(carboxymethyl)-C-hydroxycarbonimidoyl]-2-{[1,3-dihydroxy-1-(7-methoxy-2-oxo-2H-chromen-6-yl)-3-methylbutan-2-yl]sulfanyl}ethyl}-C-hydroxycarbonimidoyl)butanoic acid	HMDB0130524	C25H33N3O11S	258.629	258.629	606.175	88.7696	71.7561	90.2678	60.8534	84.7916	52.8008	90.1496	66.185	105.578	69.9181	111.994	66.2946	34.9687	60.9316	90.224	67.8957	79.0778	64.0736	92.2237	58.9335	99.9233	60.9823	107.646	92.9417	77.1369	98.6751	80.6995	73.0609	86.8821	67.5628	99.06	66.3303
TN2315	7-hydroxy-3-phenyl-3,4-dihydro-2H-1-benzopyran-4-one	HMDB0130494	C15H12O3	133.117	133.117	279.042	607.091	617.232	555.059	599.112	458.907	284.84	511.693	391.56	518.722	504.076	475.567	362.333	315.811	483.038	516.519	292.468	647.785	363.643	450.655	1047.26	586.01	634.437	590.129	525.517	392.412	433.105	683.817	492.44	452.203	706.278	472.829	494.567
TN2678	2-[3,5-dihydroxy-4-(sulfooxy)phenyl]acetic acid	HMDB0130454	C8H8O8S	68.6696	68.6696	286.973	923.754	991.528	471.302	163.48	1003.36	1014.1	488.315	445.039	744.223	356.75	547.609	823.017	646.285	499.878	970.926	597.61	424.052	893.256	456.233	417.003	556.616	234.664	624.421	572.804	842.406	833.598	1061.28	896.723	791.399	891.16	966.146	929.786
RP1346	6-(2-formyl-3,4,5-trihydroxyphenoxy)-3,4,5-trihydroxyoxane-2-carboxylic acid	HMDB0130436	C13H14O11	250.197	250.197	329.05	78.8208	68.7738	73.6574	75.1662	68.3314	77.0532	86.596	86.2284	76.3436	80.3843	62.5532	85.5358	62.5862	73.433	69.9592	72.0029	87.1788	86.6103	76.4575	100.741	94.4953	75.2872	80.5099	76.4407	79.6857	71.4416	86.8768	93.9476	79.5105	87.2596	81.7063	73.4516
RP3374	(6-carboxy-3,4,5-trihydroxyoxan-2-yl)[3,5-dihydroxy-2-(3,4,5-trihydroxyphenyl)-7H-chromen-7-ylidene]oxidanium	HMDB0130420	C21H19O13	110.81	110.81	517.038	48.5213	24.0971	31.0207	24.1809	31.6329	34.5339	26.9754	33.7558	29.1352	39.933	42.724	38.335	40.8057	18.4102	24.3713	41.1061	29.4686	67.6419	50.8028	39.6594	42.3584	29.7933	29.3987	24.3877	32.9241	35.5476	51.9663	28.5504	52.9243	31.0307	31.5878	43.0003
TN1278	2-amino-4-({1-[(carboxymethyl)-C-hydroxycarbonimidoyl]-2-{[2-hydroxy-3-(4-hydroxy-2-methoxyphenyl)-1-phenylpropyl]sulfanyl}ethyl}-C-hydroxycarbonimidoyl)butanoic acid	HMDB0130358	C26H33N3O9S	258.602	258.602	564.189	17.0259	16.337	23.5267	20.6125	19.5628	19.2256	14.1235	17.531	19.4917	25.4621	26.6389	19.6369	3.97143	22.9233	22.5452	23.2811	22.3249	20.5726	16.6881	30.929	21.6474	20.9452	24.8517	21.4509	23.6315	25.3832	26.8831	22.9625	21.3754	41.8283	28.9886	22.5997
TN1692	{3-[(1E)-3-(4-hydroxy-2-methoxyphenyl)prop-1-en-1-yl]phenyl}oxidanesulfonic acid	HMDB0130356	C16H16O6S	77.1081	77.1081	337.075	299.824	1595.57	1529.83	1042.85	554.311	303.338	1039.6	1005.06	523.432	1606.18	1541.5	465.835	354.999	1762.62	1736.68	654.794	194.294	282.842	372.247	1721.19	613.973	1449.14	393.328	511.042	288.04	339.531	222.03	391.554	217.638	996.42	275.302	843.327
RP2147	{2-[2-(acetyloxy)propan-2-yl]-6-(2-methylbut-3-en-2-yl)-7-oxo-2H,3H,7H-furo[3,2-g]chromen-3-yl}oxidanesulfonic acid	HMDB0130305	C21H24O9S	233.233	233.233	453.122	123.797	899.29	1589.69	932.633	360.225	100.768	674.356	476.769	142.5	1334.15	1603.33	383.926	861.491	1420.83	1139.75	299.749	32.4258	4.10311	3.24924	1172.94	658.945	1430.61	160.447	617.523	36.1227	8.79476	14.4339	50.9239	17.9655	753.339	137.269	1081.63
TN2275	6-{4-[(1E)-3-[(3-carboxy-5,6-dihydroxycyclohex-3-en-1-yl)oxy]-3-oxoprop-1-en-1-yl]-2-hydroxyphenoxy}-3,4,5-trihydroxyoxane-2-carboxylic acid	HMDB0130151	C22H24O14	134.405	134.405	495.119	27.6719	17.3483	183.384	13.2264	188.255	12.1102	369.982	12.7539	371.339	11.1779	364.844	11.87	14.1814	12.59	434.032	13.0103	305.797	15.3979	547.729	57.7964	481.286	293.861	282.952	103.212	14.6644	378.814	17.6967	20.2946	116.289	16.6421	370.291	48.2705
TN2323	3,4,5-trihydroxy-6-{[8-(2-hydroxypropan-2-yl)-4-(1-hydroxypropyl)-2-oxo-2H,8H,9H-furo[2,3-h]chromen-5-yl]oxy}oxane-2-carboxylic acid	HMDB0130138	C23H28O12	74.4772	74.4772	519.146	22.7094	49.0946	42.0003	37.8901	31.6678	20.8939	24.8894	25.8844	17.0015	64.1294	39.6838	15.1823	10.6016	40.7535	32.0216	21.0584	17.9452	15.9289	15.6195	46.6696	24.8449	70.7586	23.7909	32.3491	17.6834	19.5172	21.6786	20.3969	20.0198	48.6896	15.2201	43.0477
TN736	3,4,5-trihydroxy-6-[(3-hydroxybutanoyl)oxy]oxane-2-carboxylic acid	HMDB0130130	C10H16O9	492.346	492.346	281.089	144.761	160.862	102.71	89.086	131.583	143.831	73.1292	82.8319	111.882	134.237	124.714	171.621	58.3605	124.497	170.352	112.306	68.9914	51.4447	68.103	56.3816	59.7876	76.0433	52.3246	79.551	59.0446	138.095	83.0062	88.9454	110.438	114.073	124.769	100.614
TN811	3,4,5-trihydroxy-6-{[8-(2-hydroxypropan-2-yl)-2-oxo-4-propyl-2H,8H,9H-furo[2,3-h]chromen-5-yl]oxy}oxane-2-carboxylic acid	HMDB0130128	C23H28O11	128.596	128.596	519.128	48.5112	45.3434	42.4184	42.2728	41.7201	40.9953	44.6467	35.4915	39.3943	41.1574	45.4477	41.8524	22.6413	44.2092	43.7728	56.7476	47.1248	52.2503	44.9817	57.5908	48.9364	29.398	48.7449	62.6139	61.3678	55.2819	69.0995	66.9662	49.9758	73.1355	50.8687	43.7049
TN1269	(4-{3,5-dihydroxy-2,2-dimethyl-8-oxo-6-propyl-2H,3H,4H,8H-pyrano[3,2-g]chromen-10-yl}-4-oxobutoxy)sulfonic acid	HMDB0130113	C21H26O10S	256.507	256.507	471.132	94.0973	102.753	86.7776	116.714	81.4451	103.223	95.7841	110.084	79.1396	115.376	77.75	94.198	10.6078	106.374	79.5445	111.826	99.4984	100.878	58.6785	113.777	92.0828	105.107	111.107	107.239	111.397	94.4163	105.933	97.6731	87.2287	145.307	127.373	133.063
TN2446	{10-butanoyl-5-hydroxy-2,2-dimethyl-8-oxo-6-propyl-2H,3H,4H,8H-pyrano[3,2-g]chromen-3-yl}oxidanesulfonic acid	HMDB0130102	C21H26O9S	294.389	294.389	493.095	43.536	61.6418	54.8507	51.5186	54.0366	40.8225	40.0565	34.4166	56.7256	64.8911	61.0256	50.7008	16.4734	51.2223	53.5106	39.4001	30.4821	27.4783	30.7425	60.2833	46.2277	51.3215	46.0811	42.8158	50.7807	56.2329	46.4131	69.5278	54.9655	79.8179	59.764	54.9091
TN2625	{[1-hydroxy-1-(7-hydroxy-1-oxo-1H-isochromen-3-yl)butan-2-yl]oxy}sulfonic acid	HMDB0130072	C13H14O8S	259.593	259.593	295.03	80.6137	82.1588	64.6836	69.7234	76.0503	72.9813	79.8512	77.3474	82.6591	79.3294	83.9442	78.9467	65.0081	73.4058	70.8219	73.1602	70.4843	69.7011	73.0221	63.2623	69.479	69.8895	75.9971	74.6453	76.5703	79.8639	69.4413	66.4453	72.2024	76.3792	78.231	73.1979
TN867	3,4,5-trihydroxy-6-[2-hydroxy-1-(1-oxo-1H-isochromen-3-yl)butoxy]oxane-2-carboxylic acid	HMDB0130066	C19H22O10	311.944	311.944	393.119	40.4162	42.4335	39.4916	30.6874	28.1518	27.6482	32.4641	29.9865	37.8309	23.1837	40.3701	41.6122	8.7897	32.221	27.63	35.2274	45.3043	49.0914	31.9692	47.9825	27.5474	29.3859	39.4332	26.6146	40.0267	40.2446	36.1189	36.5826	40.12	40.9661	37.2845	33.0979
RP3367	6-(1-carboxy-2-methoxy-2-oxoethyl)-3,4,5-trihydroxyoxane-2-carboxylic acid	HMDB0130027	C10H14O10	88.7538	88.7538	312.096	51.2011	36.2269	55.4295	83.2671	60.3236	58.8589	63.2354	64.4105	184.567	73.7762	86.8768	55.3159	88.9366	41.3094	49.2986	99.9292	68.4395	54.8092	56.9727	78.8665	61.586	60.0157	48.7753	58.165	65.8415	76.3879	60.1834	12.1876	218.18	61.2532	51.2693	49.5141
TN1517	3,4,5-trihydroxy-6-{1-methoxy-1,3-dioxo-3-[(3,4,5,6-tetrahydroxyoxan-2-yl)methoxy]propan-2-yl}oxane-2-carboxylic acid	HMDB0130025	C16H24O15	263.604	263.604	479.1	34.7018	53.092	46.697	35.7086	49.1005	28.0815	48.8091	39.199	21.7245	27.9261	25.6478	27.5317	9.19792	18.6753	23.2058	15.6925	31.6244	27.6345	29.1461	26.683	26.8803	22.4188	40.5575	20.8892	25.8113	25.8905	25.9918	35.2989	20.4799	24.0593	24.3741	21.2565
TN1520	{3-[2-(3,5-dihydroxyphenyl)ethyl]phenyl}oxidanesulfonic acid	HMDB0129951	C14H14O6S	70.248	70.248	293.048	73.4764	63.2738	53.769	53.8485	63.2554	64.9936	65.6322	91.6061	98.1066	54.1685	62.6128	81.7994	85.626	98.2959	83.1442	79.0547	69.0187	91.2125	81.9543	59.3221	68.0637	105.073	82.8058	68.7454	105.043	112.219	145.156	94.426	98.8252	124.445	99.8629	83.2198
TN483	6-{4-[5,7-dihydroxy-3-(8-hydroxy-3,7-dimethylocta-2,6-dien-1-yl)-6-(3-methylbut-2-en-1-yl)-4-oxo-3,4-dihydro-2H-1-benzopyran-2-yl]-3-hydroxyphenoxy}-3,4,5-trihydroxyoxane-2-carboxylic acid	HMDB0129803	C36H44O13	763.832	763.832	723.231	29.7919	19.5003	26.8475	19.6913	21.3825	18.9159	18.5314	18.705	24.6456	22.4082	21.6831	29.939	23.7513	24.2845	25.7169	21.3453	14.4122	23.4521	15.5695	17.5026	15.5609	20.0672	16.5447	14.739	14.0569	19.2872	18.5523	16.702	16.1753	17.1317	9.21591	7.8124
RP2608	[(2-{2-[2-(2,4-dihydroxyphenyl)-5,7-dihydroxy-6-(3-methylbut-2-en-1-yl)-4-oxo-3,4-dihydro-2H-1-benzopyran-3-yl]ethylidene}-6-methylhept-5-en-1-yl)oxy]sulfonic acid	HMDB0129802	C30H36O10S	450.5	450.5	606.237	33.4016	15.4037	26.0029	36.8104	22.3107	15.2697	19.9636	23.597	31.0094	15.5149	49.9647	21.4283	47.336	22.3231	22.7855	31.6634	40.3781	16.9877	34.7212	47.2561	35.5304	18.7522	18.1292	41.435	50.2168	17.5338	15.7547	31.6006	18.2878	20.6275	13.2056	14.6727
RP3213	2-(2,4-dihydroxy-5-methoxyphenyl)-3-(3,7-dimethylocta-2,6-dien-1-yl)-5,7-dihydroxy-6-(3-methylbut-2-en-1-yl)-4H-chromen-4-one	HMDB0129783	C31H36O7	387.818	387.818	538.279	1367.68	1786.01	652.643	1891.68	1376.53	870.967	1797.87	1050.98	1826.29	1136.29	2356.97	1198.55	2023.51	1420.27	866.427	1353.28	1399.23	1070.45	1428.68	2080.87	1918.08	1865.53	1850.57	1605.87	6398.22	956.122	1112.05	2168.37	2700.1	1265.74	725.168	1046.11
TN1233	6-{[2-(2,4-dihydroxyphenyl)-3-(3,7-dimethylocta-2,6-dien-1-yl)-6-[(3,3-dimethyloxiran-2-yl)methyl]-7-hydroxy-4-oxo-4H-chromen-5-yl]oxy}-3,4,5-trihydroxyoxane-2-carboxylic acid	HMDB0129769	C36H42O13	258.203	258.203	683.263	15.1089	19.5361	19.2394	18.1906	15.8702	16.0653	16.3851	20.9263	20.0381	26.5466	25.9275	19.8378	2.20379	25.5387	17.072	29.3091	28.1062	22.5318	11.6514	27.7251	26.1536	20.4642	23.9313	22.1157	25.4446	30.9197	24.886	23.3796	21.2408	38.9106	29.8783	27.2655
TN1513	({4-[2-(2,4-dihydroxyphenyl)-3-(3,7-dimethylocta-2,6-dien-1-yl)-7-hydroxy-4-oxo-4H-chromen-8-yl]-2-methylbut-2-en-1-yl}oxy)sulfonic acid	HMDB0129676	C30H34O9S	839.369	839.369	553.19	125.043	67.8363	132.09	95.4348	90.1966	101.046	105.092	93.4198	62.041	63.2276	46.855	68.4172	34.0427	40.67	41.8352	60.5195	87.2012	83.7133	128.833	141.295	106.863	67.7986	118.729	94.7572	81.0342	65.7733	98.9693	49.5732	74.8574	69.1224	71.5754	61.7071
RP2972	[4-(5-hydroxy-7-methoxy-8-methyl-4-oxo-4H-chromen-3-yl)-2-methoxyphenyl]oxidanesulfonic acid	HMDB0129590	C18H16O9S	86.5857	86.5857	409.059	158.905	131.16	199.789	190.755	185.969	195.897	230.862	227.244	251.806	161.282	231.514	168.553	212.265	139.086	225.155	213.925	235.356	214.363	244.205	180.786	213.155	218.095	204.72	194.354	216.555	253.141	216.464	303.409	191.035	174.906	190.882	141.448
TN1854	6-[(6-{[3-(3,4-dimethoxyphenyl)-7-methoxy-8-methyl-4-oxo-4H-chromen-5-yl]oxy}-3,4,5-trihydroxyoxan-2-yl)methoxy]-3,4,5-trihydroxyoxane-2-carboxylic acid	HMDB0129587	C31H36O17	73.5259	73.5259	703.189	16.6247	150.042	173.624	115.168	16.2954	15.6981	75.9685	91.3628	19.5035	710.517	186.684	26.3217	21.2114	408.151	113.517	37.7389	14.749	13.3006	10.4207	154.297	47.6373	350.532	13.5026	45.0097	16.365	9.16628	11.0931	10.1734	15.2997	75.2211	22.5108	121.199
TN2717	6-({2-[(2-{[3-(3,4-dimethoxyphenyl)-7-methoxy-8-methyl-4-oxo-4H-chromen-5-yl]oxy}-4,5-dihydroxy-6-(hydroxymethyl)oxan-3-yl)oxy]-4,5-dihydroxy-6-methyloxan-3-yl}oxy)-3,4,5-trihydroxyoxane-2-carboxylic acid	HMDB0129578	C37H46O21	80.1696	80.1696	827.259	21.6494	77.0934	46.2872	21.1478	3.03284	2.77373	7.79963	11.1283	0.814426	299.42	78.3999	2.82114	7.17155	116.66	26.3864	2.7884	2.74644	1.92792	1.71824	52.0806	24.1326	331.611	5.55455	14.533	3.82057	3.36171	4.27557	2.95802	2.70296	14.6603	1.5107	19.6965
RP3118	2-amino-4-({1-[(carboxymethyl)-C-hydroxycarbonimidoyl]-2-{[3-hydroxy-2-methyl-4-({7-oxo-7H-furo[3,2-g]chromen-4-yl}oxy)butan-2-yl]sulfanyl}ethyl}-C-hydroxycarbonimidoyl)butanoic acid	HMDB0129421	C26H31N3O11S	132.794	132.794	616.159	133.437	218.775	232.662	281.698	183.911	116.211	138.246	86.2723	69.9262	142.411	147.212	198.273	224.362	235.488	328.227	240.067	240.463	122.24	129.244	127.953	179.676	469.073	275.899	239.041	185.153	172.25	34.1749	124.694	72.2159	202.923	229.176	198.655
TN793	2-amino-4-({1-[(carboxymethyl)-C-hydroxycarbonimidoyl]-2-{[3-hydroxy-3-methyl-1-({7-oxo-7H-furo[3,2-g]chromen-4-yl}oxy)butan-2-yl]sulfanyl}ethyl}-C-hydroxycarbonimidoyl)butanoic acid	HMDB0129420	C26H31N3O11S	134.957	134.957	616.169	42.3048	33.7217	34.7327	41.6474	33.1085	30.8809	41.0913	29.6633	41.9284	45.4296	45.3731	29.7343	23.2463	43.8175	42.1724	40.9556	41.4612	41.9393	36.8958	43.877	43.3116	59.8975	51.5955	36.0628	61.4216	41.2839	54.6071	51.4941	41.0706	49.223	42.8934	42.4171
TN662	2-{[hydroxy(4-methoxy-1-benzofuran-5-yl)methylidene]amino}acetic acid	HMDB0129408	C12H11NO5	69.1991	69.1991	214.052	215.5	133.953	232.262	324.868	122.285	116.242	241.416	272.29	115.488	275.596	119.482	157.261	72.4056	175.958	78.8742	159.835	315.798	219.981	282.831	406.172	464.606	343.713	403.502	355.287	243.337	199.539	265.296	93.8784	205.113	556.696	557.423	628.103
RP2574	2-{[hydroxy(6-hydroxy-2H-1,3-benzodioxol-5-yl)methylidene]amino}acetic acid	HMDB0129401	C10H9NO6	67.5601	67.5601	222.041	361.418	327.138	234.306	280.75	367.114	398.852	259.135	271.948	299.877	189.736	343.666	231.553	243.485	210.58	365.587	322.571	274.183	386.636	354.14	289.999	245.571	245.8	290.872	267.829	278.772	296.022	301.173	312.849	362.24	316.72	289.743	255.96
TN1389	[3-(2H-1,3-benzodioxol-5-yl)-1-(4-methoxy-1-benzofuran-5-yl)-3-oxopropoxy]sulfonic acid	HMDB0129396	C19H16O9S	222.211	222.211	403.048	527.254	582.565	769.337	327.484	510.152	343.029	749.313	347.268	458.478	440.443	470.496	289.932	186.722	389.85	456.012	230.213	289.057	374.217	310.268	756.322	407.413	193.345	414.654	397.982	231.59	360.501	443.036	356.068	459.708	482.412	502.924	416.071
RP3314	1-(4-hydroxy-3-methoxyphenyl)-3-(4-methoxy-1-benzofuran-5-yl)propane-1,3-dione	HMDB0129392	C19H16O6	70.1866	70.1866	379.06	53.9717	63.2094	86.6238	88.6005	76.9604	92.2715	103.967	103.83	108.731	147.352	82.5759	98.2252	62.7058	119.162	120.361	126.804	119.105	104.223	93.7504	131.364	115.57	92.1385	89.9462	55.794	107.893	51.0554	113.231	106.72	116.629	101.449	92.5642	74.6693
TN1725	3-(2H-1,3-benzodioxol-5-yl)-3-oxopropanoic acid	HMDB0129376	C10H8O5	527.334	527.334	247	134.739	135.825	126.742	129.331	128.995	124.252	134.337	126.623	123.201	131.015	121.711	122.446	122.777	130.565	119.597	111.043	118.983	121.848	131.301	126.787	119.764	129.777	117.477	125.329	122.525	132.058	125.806	127.246	131.558	134.176	130.191	130.635
TN1419	1-(6-hydroxy-2H-1,3-benzodioxol-5-yl)-3-(4-methoxy-1-benzofuran-5-yl)propane-1,3-dione	HMDB0129362	C19H14O7	116.136	116.136	393.037	41.3625	77.67	81.5197	46.5922	41.8718	36.6168	53.5671	41.5711	86.9545	44.7552	93.8784	40.0769	71.1792	51.6133	86.5865	87.9296	105.8	85.7099	98.3465	60.6798	81.7363	29.8694	80.6966	41.3384	88.7279	108	92.4875	36.862	78.6475	93.0266	31.1409	83.0592
RP1935	5,8-dihydroxy-2-(1-hydroxy-3-methoxy-4-oxocyclohexyl)-3,7-dimethoxy-4H-chromen-4-one	HMDB0129296	C18H20O9	115.417	115.417	419.075	71.3522	47.2229	49.1382	43.3588	64.9594	42.6361	48.0324	48.0857	55.7145	50.5221	53.332	54.0941	60.6503	34.0541	40.8844	75.5644	76.3821	56.0775	66.7841	66.4566	83.6838	57.3473	62.0848	61.6155	55.9416	49.0215	70.8957	49.1343	72.8915	71.178	54.745	57.6874
TN2098	5,8-dihydroxy-2-(1-hydroxy-3-methoxy-4-oxocyclohexa-2,5-dien-1-yl)-3,7-dimethoxy-4H-chromen-4-one	HMDB0129273	C18H16O9	70.9061	70.9061	377.086	346.206	12948.4	11422	7156.11	1236.46	367.506	4530.27	4756.82	574.151	29754.1	12819.7	1364.57	1251.42	16754.1	4741.24	1393.21	319.654	77.3266	64.1204	12095.3	2826.55	24079.9	659.635	2162.19	276.153	149.232	159.617	425.018	174.872	3605.76	555.959	4430.65
RP2999	5,8-dihydroxy-2-(4-hydroxy-3-methoxyphenyl)-3,7-dimethoxy-4H-chromen-4-one	HMDB0129270	C18H16O8	257.97	257.97	378.122	42.0151	100.192	30.625	39.8024	40.922	45.3745	32.9284	28.2236	46.3249	43.6491	59.0898	64.8496	47.9279	49.3379	51.9419	51.1358	34.9683	33.37	43.0969	39.4638	35.3276	47.2363	27.7881	32.5338	53.5861	39.6631	43.5388	54.8466	132.302	63.2178	54.7301	39.8521
RP2314	3-(3-hydroxyphenyl)-2-phenyl-4-[(E)-2-phenylethenyl]-2,3-dihydro-1-benzofuran-6-ol	HMDB0129161	C28H22O3	75.9679	75.9679	389.154	52.1208	49.7508	76.2283	76.1707	86.1031	75.6638	89.8289	90.1401	50.559	93.983	65.8085	56.2355	47.4723	61.8183	66.4225	65.3075	74.6623	73.8899	67.3186	86.9411	58.6453	76.9947	52.6971	68.5385	87.8375	81.1711	53.7175	52.322	51.1616	58.0235	57.9227	69.0951
TN1913	2-amino-4-({1-[(carboxymethyl)-C-hydroxycarbonimidoyl]-2-({4-[(8-{2-[(2-hydroxyacetyl)oxy]propan-2-yl}-2-oxo-2H,8H,9H-furo[2,3-h]chromen-9-yl)oxy]-3-methyl-4-oxobutan-2-yl}sulfanyl)ethyl}-C-hydroxycarbonimidoyl)butanoic acid	HMDB0129109	C31H39N3O14S	464.312	464.312	710.217	66.3752	58.6653	53.4464	94.095	51.9315	44.9853	36.1633	41.7985	57.036	26.1776	99.7514	55.8899	53.4228	38.3645	49.6925	81.3329	60.9354	45.131	47.5513	56.6334	67.4844	61.5123	47.3326	65.6061	136.457	46.6117	5.68623	110.437	84.2044	30.6511	4.62197	20.8108
RP3287	3,4,5-trihydroxy-6-{[2-(9-{[(2E)-2-methylbut-2-enoyl]oxy}-2-oxo-2H,8H,9H-furo[2,3-h]chromen-8-yl)propan-2-yl]oxy}oxane-2-carboxylic acid	HMDB0129100	C25H28O12	94.3459	94.3459	559.121	16.6504	31.5443	73.0839	49.3065	64.0436	44.8747	75.11	62.0291	130.887	261.33	91.181	33.6322	41.2521	228.312	114.54	93.9204	74.7365	68.0097	82.1826	122.617	70.3762	450.922	47.9765	31.6768	69.6216	98.6872	82.185	108.629	64.644	76.3556	56.2693	28.7749
RP1029	8-(1,2-dihydroxypropan-2-yl)-2-oxo-2H,8H,9H-furo[2,3-h]chromen-9-yl (2E)-2-methylbut-2-enoate	HMDB0129095	C19H20O7	309.954	309.954	378.154	191.969	136.28	154.592	189.632	185.593	193.042	166.827	164.324	192.947	150.327	189.665	190.614	147.539	154.001	180.306	205.595	243.692	227.161	255.21	196.131	230.527	203.665	214.666	229.369	238.71	242.079	214.77	213.556	421.41	305.316	314.116	267.986
TN2363	8-{2-[(2-hydroxyacetyl)oxy]propan-2-yl}-2-oxo-2H,8H,9H-furo[2,3-h]chromen-9-yl (2E)-2-methylbut-2-enoate	HMDB0129094	C21H22O8	74.185	74.185	441.09	33.0171	329.071	344.186	252.613	45.7769	31.3214	141.055	141.208	30.3976	541.251	342.923	44.4973	48.9004	440.388	151.788	63.8539	40.4892	19.0912	26.5217	330.72	105.61	652.076	39.7722	84.9482	32.1823	29.7616	30.51	32.5615	34.233	149.988	91.7359	154.796
RP2614	6-{5-[3-(3,4-dihydroxyphenyl)oxiran-2-yl]-3-hydroxy-2-[(1E)-3-methylbut-1-en-1-yl]phenoxy}-3,4,5-trihydroxyoxane-2-carboxylic acid	HMDB0129066	C25H28O11	70.6001	70.6001	543.127	43.7255	1362.04	1389.14	405.682	71.9571	51.3793	270.193	273.443	50.6935	9761.51	2160.76	79.0905	126.878	2776.55	502.819	85.3944	24.9655	30.464	32.5719	1410.05	210.719	4942.83	58.4632	108.141	52.3677	33.9295	40.7452	47.7872	42.0545	216.661	60.1718	247.977
TN2071	6-{4-[(E)-2-{3,5-dihydroxy-4-[(1E)-3-methylbuta-1,3-dien-1-yl]phenyl}ethenyl]phenoxy}-3,4,5-trihydroxyoxane-2-carboxylic acid	HMDB0129029	C25H26O9	76.9176	76.9176	509.12	20.6257	102.852	89.4589	74.8976	35.1287	24.2667	41.9365	46.9891	24.6106	95.0776	114.595	28.1176	14.7039	133.889	64.6417	28.3273	27.9405	22.8877	16.0921	73.7864	45.1797	157.431	26.4216	36.6558	26.7998	21.7298	20.7486	25.3685	24.9532	52.2935	30.3304	63.2302
TN1384	{4-[(E)-2-{3,5-dihydroxy-4-[(1E)-3-methylbut-1-en-1-yl]phenyl}ethenyl]phenyl}oxidanesulfonic acid	HMDB0128996	C19H20O6S	275.739	275.739	359.096	62.2144	49.9408	89.921	58.2418	63.2384	53.826	56.7425	66.1262	66.1801	67.6724	64.1553	40.4366	14.1931	51.4007	42.7238	63.1069	38.0098	52.6491	34.1297	79.7594	46.7048	40.2974	37.8206	47.112	40.3252	29.7223	50.9815	30.6508	69.0314	63.5785	45.0828	58.1208
TN1698	2-{9-hydroxy-2-oxo-2H,8H,9H-furo[2,3-h]chromen-8-yl}propan-2-yl (2E)-3-(2,4-dihydroxyphenyl)prop-2-enoate	HMDB0128948	C23H20O8	77.5343	77.5343	389.104	39.9659	76.2048	60.3682	68.7365	35.0784	54.8967	54.0144	57.7375	39.202	112.866	52.6928	48.2111	8.1083	76.5971	48.5846	50.6695	44.0433	27.5604	25.5166	55.8018	35.1253	85.511	33.7315	30.9046	30.6222	29.0755	22.1962	26.637	30.0264	49.7459	37.8919	52.0907
TN2459	3,4,5-trihydroxy-6-[(3-methylbut-2-enoyl)oxy]oxane-2-carboxylic acid	HMDB0128920	C11H16O8	155.89	155.89	299.073	159.162	231.874	339.095	309.144	328.23	328.432	361.843	336.755	447.984	295.947	422.684	370.53	108.926	337.83	410.043	443.177	391.252	482.465	502.447	374.15	280.035	285.383	398.562	321.049	372.157	484.754	444.571	366.585	347.147	350.03	258.876	270.049
RP2944	1-hydroxy-2-{9-[(3-methylbut-2-enoyl)oxy]-2-oxo-2H,8H,9H-furo[2,3-h]chromen-8-yl}propan-2-yl 3-methylbut-2-enoate	HMDB0128914	C24H26O8	77.8217	77.8217	460.198	35.9684	577.103	791.714	417.79	104.735	67.38	202.161	238.458	67.3194	2154.84	1074.41	93.2355	145.658	1012.1	429.498	115.72	47.6147	45.0483	25.9254	994.723	265.28	1994.6	82.8508	186.319	43.4197	32.5481	34.1363	64.7448	31.7209	383.218	80.2754	438.657
RP1963	{4-[2,3-dioxo-3-(2,4,6-trihydroxy-3-methoxyphenyl)propyl]-2-methoxyphenyl}oxidanesulfonic acid	HMDB0128787	C17H16O11S	78.1675	78.1675	451.035	86.2926	145.833	113.727	93.1317	95.7092	106.825	114.954	118.774	111.883	211.856	124.096	95.4036	78.6541	123.21	95.2144	97.883	119.808	70.8559	84.004	111.217	87.8935	114.74	93.0024	107.965	101.754	93.456	91.8857	95.6253	76.2832	80.4384	73.3649	87.7386
TN1230	2-(3,4-dihydroxy-5-methoxyphenyl)-3,5,7-trihydroxy-6-methoxy-4H-chromen-4-one	HMDB0128749	C17H14O9	313.09	313.09	401.027	164.868	171.188	146.554	142.964	140.478	142.586	138.839	153.383	143.369	165.31	151.345	146.246	93.9521	150.617	148.962	142.741	145.906	147.089	147.02	139.18	153.618	168.51	155.19	162.088	161.053	153.532	161.065	147.825	143.408	145.843	173.112	165.443
RP2594	7-[(6-carboxy-3,4,5-trihydroxyoxan-2-yl)oxy]-6-methoxy-2H-1,3-benzodioxole-5-carboxylic acid	HMDB0128738	C15H16O12	74.677	74.677	411.052	38.8237	71.1342	84.3719	76.9246	25.435	49.6418	91.208	74.5413	69.954	103.828	68.3701	54.9001	29.875	63.8644	66.1334	69.0928	34.8217	34.0202	44.6936	82.3659	67.8641	87.9165	56.4827	58.1658	36.8093	58.1714	41.1903	73.9095	38.3276	69.5595	54.5905	48.4138
TN2195	6-{[6-(2-carboxyethyl)-4-methoxy-2H-1,3-benzodioxol-5-yl]oxy}-3,4,5-trihydroxyoxane-2-carboxylic acid	HMDB0128730	C17H20O12	73.6882	73.6882	439.084	274.188	7437.86	7814.68	5515.81	792.619	301.387	3002.64	3070.75	343.137	12946.8	7419.46	757.586	471.747	9903.72	3056.35	889.332	271.328	76.3064	72.1443	7680.13	2088.01	14776.9	396.395	1542.46	185.502	101.345	117.489	257.853	153.682	2763.52	308.963	2956.39
RP3381	6-{[(2Z)-3-(6,7-dimethoxy-2H-1,3-benzodioxol-5-yl)-2-hydroxyprop-2-enoyl]oxy}-3,4,5-trihydroxyoxane-2-carboxylic acid	HMDB0128729	C18H20O13	80.1747	80.1747	483.055	38.3264	29.0848	40.8376	39.9182	64.5214	52.4141	47.7201	45.0345	61.7443	54.5509	58.5887	35.0587	43.3751	37.9272	47.2327	40.9969	48.0894	48.2974	56.6886	48.2783	53.7279	32.6152	40.6209	51.7888	50.9702	48.4926	51.0215	50.8457	52.006	45.5724	43.3063	47.375
TN1932	2-amino-4-[(2-{[1-carboxy-2-(6,7-dimethoxy-2H-1,3-benzodioxol-5-yl)-2-hydroxyethyl]sulfanyl}-1-[(carboxymethyl)-C-hydroxycarbonimidoyl]ethyl)-C-hydroxycarbonimidoyl]butanoic acid	HMDB0128723	C22H29N3O13S	128.041	128.041	598.138	37.6493	28.6713	67.5435	36.1893	41.8483	20.5792	54.3508	24.5053	50.0292	30.801	39.9146	22.2174	35.3887	35.9653	44.1378	30.1057	39.0613	26.7102	40.8041	46.805	53.4183	50.3351	54.2586	42.7008	49.1415	46.4453	42.3287	36.6518	37.4828	56.0357	46.1116	52.0106
RP858	2-amino-4-({1-[(carboxymethyl)-C-hydroxycarbonimidoyl]-2-{[1-(6,7-dimethoxy-2H-1,3-benzodioxol-5-yl)-2,3-dihydroxypropyl]sulfanyl}ethyl}-C-hydroxycarbonimidoyl)butanoic acid	HMDB0128716	C22H31N3O12S	263.491	263.491	562.17	14.0033	12.4389	24.5113	23.0572	18.6618	12.0777	17.9053	29.4571	25.2864	20.8206	20.6833	18.8698	27.166	17.9198	20.4618	28.0274	35.9726	27.4644	25.3259	35.0293	31.5632	36.143	25.6086	33.4268	26.9644	32.9964	31.6973	25.5439	35.9192	32.6928	43.3372	32.2929
TN1029	2-amino-4-({1-[(carboxymethyl)-C-hydroxycarbonimidoyl]-2-{[1-(4,5-dihydroxy-2,3-dimethoxyphenyl)-3-oxopropyl]sulfanyl}ethyl}-C-hydroxycarbonimidoyl)butanoic acid	HMDB0128696	C21H29N3O11S	257.759	257.759	532.152	100.907	101.697	113.145	118.96	96.6923	86.5499	113.074	104.158	115.595	109.015	130.855	91.4368	21.4727	112.515	111.879	116.588	119.157	95.3861	86.2471	115.829	135.756	104.728	124.917	111.768	129.37	153.326	107.925	111.681	119.43	142.208	149.506	129.812
RP1733	2-amino-4-({1-[(carboxymethyl)-C-hydroxycarbonimidoyl]-2-{[1-(6,7-dimethoxy-2H-1,3-benzodioxol-5-yl)-1-hydroxy-3-oxopropan-2-yl]sulfanyl}ethyl}-C-hydroxycarbonimidoyl)butanoic acid	HMDB0128693	C22H29N3O12S	220.311	220.311	560.153	101.307	121.265	295.345	180.489	100.631	32.5909	82.0824	21.7814	23.7939	332.254	121.916	92.2579	219.49	134.018	113.649	71.5727	11.1185	8.8252	7.76286	267.077	94.2182	58.1312	53.9234	59.148	11.6197	9.01227	14.0831	10.3139	78.2808	182.675	210.077	203.943
TN2007	2-amino-4-({1-[(carboxymethyl)-C-hydroxycarbonimidoyl]-2-{[1-(6,7-dimethoxy-2H-1,3-benzodioxol-5-yl)-3-oxopropyl]sulfanyl}ethyl}-C-hydroxycarbonimidoyl)butanoic acid	HMDB0128686	C22H29N3O11S	279.913	279.913	544.156	14.2873	49.7445	55.291	41.7621	20.7	12.6693	25.855	36.9135	16.8212	93.6454	115.959	15.4883	6.60959	93.1271	44.4039	28.9731	18.3631	11.4011	12.9774	46.6408	39.4394	107.729	15.9364	15.9248	16.5803	10.6692	12.9774	16.8013	16.4543	46.0074	15.3237	42.1882
TN2579	3-(7-hydroxy-6-methoxy-2H-1,3-benzodioxol-5-yl)prop-2-enal	HMDB0128663	C11H10O5	85.0684	85.0684	223.059	52.3514	116.094	74.4425	85.049	69.2794	115.234	65.5397	95.727	62.1946	110.665	83.7827	113.038	103.86	119.459	81.7931	90.5997	74.8349	117.009	50.6894	131.068	34.2589	77.4219	76.4557	97.3251	115.264	70.5095	169.504	64.7072	87.8584	141.907	72.3807	127.534
RP2840	2-[(5-hydroxy-1-oxo-1H-isochromen-3-yl)formamido]acetic acid	HMDB0128645	C12H9NO6	107.841	107.841	264.05	172.064	111.054	118.768	107.311	146.254	133.891	142.472	139.599	123.631	200.033	140.406	142.125	114.637	102.721	151.923	182.394	281.686	118.759	175.71	218.838	208.607	154.113	172.898	152.589	109.93	90.9838	125.844	107.26	200.05	119.535	93.0298	105.39
RP2578	2-{[hydroxy(6-hydroxy-1-oxo-1H-isochromen-3-yl)methylidene]amino}acetic acid	HMDB0128642	C12H9NO6	124.286	124.286	264.05	208.425	145.506	143.906	133.886	206.403	94.0742	134.9	113.418	115.665	175.334	121.159	208.429	172.309	102.269	192.729	250.819	179.142	103.66	119.113	177.876	287.906	163.246	193.004	213.706	106.976	102.181	121.236	98.7385	180.45	178.874	109.99	143.734
TN1533	1-oxo-1H-isochromene-3-carboxylic acid	HMDB0128616	C10H6O4	524.225	524.225	228.991	186.163	164.846	155.136	154.61	151.821	155.1	166.429	156.549	137.922	143.247	138.931	151.008	141.432	151.37	144.934	132.506	137.848	146.858	138.932	137.107	144.345	149.129	146.435	143.997	131.154	148.346	148.963	143.717	142.745	143.66	144.052	145.14
TN1342	3,4,5-trihydroxy-6-{[4-oxo-1-(5,6,7-trimethoxy-4-oxo-4H-chromen-2-yl)cyclohexa-2,5-dien-1-yl]oxy}oxane-2-carboxylic acid	HMDB0128593	C24H24O13	235.359	235.359	559.086	26.6675	189.365	261.896	189.497	64.6365	22.9292	161.754	144.256	30.1811	347.592	256.119	74.2985	39.9734	348.827	174.416	52.1926	6.49343	2.54134	5.03906	269.682	97.5835	187.81	26.8102	76.6109	6.29741	4.65393	5.88457	16.005	6.85125	134.47	19.8769	155.118
RP3209	5,6,7-trimethoxy-2-phenyl-4H-chromen-4-one	HMDB0128592	C18H16O5	70.107	70.107	351.064	105.757	176.126	230.422	198.603	144.474	140.794	151.878	157.747	116.268	236.834	374.433	150.517	147.331	332.103	231.667	110.391	80.2983	130.662	83.7466	305.613	211.507	340.391	101.036	123.541	125.008	135.057	132.596	114.78	115.315	206.587	119.603	179.324
TN1247	{3,5-dihydroxy-2-[5-hydroxy-7-methoxy-4-oxo-2-(2,4,5-trihydroxyphenyl)-4H-chromen-6-yl]-6-(hydroxymethyl)oxan-4-yl}oxidanesulfonic acid	HMDB0128565	C22H22O15S	235.442	235.442	581.069	19.5995	143.792	185.153	139.004	50.0965	17.0893	131.665	115.785	28.3695	240.712	196.088	67.3669	34.9676	250.398	147.969	44.7895	4.32731	1.9607	1.83474	180.009	80.5426	141.441	20.2389	65.4454	4.77564	4.49601	3.86112	10.1727	4.02434	105.91	11.0585	124.34
RP3291	3,4,5-trihydroxy-6-(2-hydroxy-5-{5-hydroxy-7-methoxy-4-oxo-6-[3,4,5-trihydroxy-6-(hydroxymethyl)oxan-2-yl]-4H-chromen-2-yl}phenoxy)oxane-2-carboxylic acid	HMDB0128553	C28H30O17	251.163	251.163	656.184	37.3518	72.2548	59.9394	61.8125	48.1239	62.8455	58.2584	63.5483	67.7074	68.0055	60.4458	51.6544	45.2741	58.0326	78.9786	50.5668	76.9927	46.3648	62.5266	60.4771	64.0171	126.121	94.0403	54.4537	66.0773	56.2497	47.1098	96.2396	41.2984	49.6964	53.9275	32.3022
TN1195	6-{2-[(E)-2-(3,5-dihydroxyphenyl)ethenyl]-5-hydroxyphenoxy}-3,4,5-trihydroxyoxane-2-carboxylic acid	HMDB0128528	C20H20O10	72.7262	72.7262	385.093	64.7883	77.6692	42.2063	75.4268	65.9686	76.6815	68.8405	66.1034	88.7102	51.6821	56.2703	61.6232	47.9455	45.8166	52.7499	101.934	139.231	96.3825	70.4328	53.3778	71.5056	53.58	82.0294	66.2314	115.043	123.649	107.764	81.0191	199.581	85.8157	95.9741	72.573
TN2400	{5-[(E)-2-(3,5-dihydroxyphenyl)ethenyl]-2-hydroxyphenyl}oxidanesulfonic acid	HMDB0128521	C14H12O7S	79.8085	79.8085	289.02	585.22	704.02	307.291	772.701	426.827	839.99	431.664	772.619	538.254	359.023	475.305	749.922	272.21	548.413	567.204	760.952	830.084	648.718	657.126	786.376	424.918	588.31	489.384	804.174	551.616	480.252	740.708	540.268	712.746	661.439	432.148	654.466
RP1787	6-{5-[(3-carboxy-2,5,6-trihydroxyphenoxy)carbonyl]-2,3-dihydroxyphenoxy}-3,4,5-trihydroxyoxane-2-carboxylic acid	HMDB0128376	C20H18O16	77.4513	77.4513	497.057	117.293	178.578	177.741	212.593	166.652	150.27	217.544	207.318	139.789	110.537	149.822	155.258	140.552	152.314	141.758	147.875	128.187	48.0882	44.4483	180.728	190.011	192.447	137.448	178.709	113.573	73.0033	88.6394	122.124	83.4504	171.476	148.596	186.73
RP3277	6-{4-carboxy-2-hydroxy-6-[2,4,5-trihydroxy-3-(3,4,5-trihydroxybenzoyloxy)benzoyloxy]phenoxy}-3,4,5-trihydroxyoxane-2-carboxylic acid	HMDB0128353	C27H22O20	90.7834	90.7834	667.079	75.7983	31.1338	110.742	118.729	108.128	111.259	114.003	133.356	141.793	270.575	120.48	96.584	87.381	176.239	120.056	119.154	107.294	101.298	134.421	237.661	104.91	157.666	74.5046	102.826	99.9022	140.991	95.8457	227.245	72.0615	89.0405	86.5488	36.2231
RP2361	6-[4-({3-[(5-carboxy-2,3-dihydroxyphenoxy)carbonyl]-2,5,6-trihydroxyphenoxy}carbonyl)-2,6-dihydroxyphenoxy]-3,4,5-trihydroxyoxane-2-carboxylic acid	HMDB0128350	C27H22O20	135.304	135.304	689.06	53.0952	55.1933	41.4313	44.3625	54.4787	54.9384	62.79	54.6826	46.6631	69.8341	86.4462	70.0138	76.1804	52.287	46.3146	55.2281	65.353	62.2912	73.3566	54.9433	77.9245	86.1778	51.6636	57.6588	68.011	77.4831	54.3187	69.6023	50.7865	83.6697	71.5465	49.9481
RP2809	3-{3-[3,5-dihydroxy-4-(sulfooxy)benzoyloxy]-4,5-dihydroxybenzoyloxy}-2,4,5-trihydroxybenzoic acid	HMDB0128343	C21H14O17S	70.6031	70.6031	592.98	21.4672	78.4354	26.1783	24.3383	18.5367	16.1467	28.1241	16.678	17.4748	24.0492	37.1499	12.472	23.5101	25.5684	17.6372	12.9582	17.1025	21.9839	17.6998	13.6751	20.9053	25.5699	20.6134	18.3394	23.8165	20.4361	18.4179	19.74	18.1503	12.9399	17.1617	27.2498
RP1504	3,4-dihydroxy-5-[3-hydroxy-4-methoxy-5-(3,4,5-trihydroxybenzoyloxy)benzoyloxy]benzoic acid	HMDB0128323	C22H16O13	72.0873	72.0873	511.047	34.1913	62.6609	55.6099	50.6377	36.1892	35.1693	59.5259	42.8056	33.8958	74.2984	66.2737	30.294	25.6909	64.5831	51.8304	30.041	27.3945	26.039	30.0533	19.9712	29.0694	74.7553	25.2264	33.1011	34.5394	32.2334	28.922	29.9867	27.1795	46.9759	43.025	45.9369
TN2189	3-[3,4-dihydroxy-5-(3,4,5-trihydroxybenzoyloxy)benzoyloxy]-5-hydroxy-4-(sulfooxy)benzoic acid	HMDB0128322	C21H14O16S	313.379	313.379	537.004	58.9077	62.032	46.5742	46.9838	49.6225	53.2948	49.0287	55.1575	46.4318	53.1136	43.2099	52.8765	51.7904	47.2055	48.8936	47.0711	52.1414	52.8533	51.633	44.8397	52.1224	54.1095	52.8022	56.2994	47.4732	42.5667	46.7326	47.1003	47.4501	39.0585	52.0954	49.5091
RP1396	3,4-dihydroxy-5-(3,4,5-trihydroxybenzoyloxy)benzoic acid	HMDB0128305	C14H10O9	250.411	250.411	323.04	71.6333	60.6755	70.3413	81.6279	62.897	69.1583	84.2246	71.1417	68.8019	66.7684	55.7769	67.4415	50.9701	66.0338	77.252	66.6784	80.4799	78.795	69.1338	91.8079	82.3845	81.0734	65.8257	72.9673	79.2973	74.2454	74.2283	86.7817	65.7294	95.7234	96.6089	67.363
TN1841	3,4,5-trihydroxy-6-[4-(3-oxo-3-{2,3,4-trihydroxy-5-[hydroxy(3,4,5-trihydroxyoxan-2-yl)methyl]-6-oxo-3-[3,4,5-trihydroxy-6-(hydroxymethyl)oxan-2-yl]cyclohexa-1,4-dien-1-yl}propyl)phenoxy]oxane-2-carboxylic acid	HMDB0128236	C33H42O22	73.6881	73.6881	791.232	27.1678	548.276	267.08	130.487	54.8323	41.2474	136.734	157.28	45.0144	1443.78	501.115	111.162	47.9816	863.482	434.885	96.7097	16.6049	8.07619	8.98737	371.801	108.67	513.73	19.6351	103.8	36.0967	11.7515	29.4984	26.3	34.246	303.191	44.7578	474.434
TN1125	3,4,5-trihydroxy-2-[hydroxy(3,4,5-trihydroxyoxan-2-yl)methyl]-4-[3,4,5-trihydroxy-6-(hydroxymethyl)oxan-2-yl]cyclohexa-2,5-dien-1-one	HMDB0128223	C18H26O14	136.306	136.306	449.132	23.0321	21.0647	46.9163	40.7413	26.5096	14.4553	36.6309	18.8866	23.4503	28.1812	39.3947	13.8976	9.85045	25.926	35.854	23.3808	43.9166	19.7462	29.895	81.3761	56.9859	59.3049	59.4426	51.7381	28.9868	52.9153	30.1673	39.909	42.6888	36.421	44.9303	47.6027
RP3054	5,7-dihydroxy-2-(1-hydroxy-3,5-dimethoxy-4-oxocyclohexyl)-4H-chromen-4-one	HMDB0128219	C17H18O8	74.5486	74.5486	373.087	132.02	75.4851	130.663	114.48	147.569	169.539	286.927	240.583	182.248	240.499	122.824	232.682	128.921	194.045	141.638	132.034	291.047	221.472	262.746	247.69	135.764	105.906	150.621	134.829	258.596	167.225	219.706	193.751	158.67	256.837	166.598	170.912
RP1349	5,7-dihydroxy-2-(4-hydroxy-3-methoxyphenyl)-3,4-dihydro-2H-1-benzopyran-3-yl 3,4,5-trihydroxybenzoate	HMDB0128194	C23H20O10	283.663	283.663	439.104	585.439	554.108	675.695	699.789	645.522	661.366	723.973	665.349	780.712	710.219	704.808	693.766	647.493	687.127	759.928	761.971	633.13	644.544	796.385	687.033	637.298	687.158	640.215	585.434	611.086	647.011	661.838	658.583	512.562	608.463	602.142	485.616
RP1827	6-{[2-(3,4-dihydroxyphenyl)-3,5,7-trihydroxy-4-oxo-4H-chromen-6-yl]oxy}-3,4,5-trihydroxyoxane-2-carboxylic acid	HMDB0128155	C21H18O14	115.503	115.503	533.031	58.19	40.9521	50.124	47.8521	52.8756	52.761	49.7495	50.1722	54.2303	49.8467	40.6467	62.8651	53.779	24.3086	28.4958	35.0629	53.3759	84.7556	97.7365	48.9192	64.3571	47.1726	50.8689	54.9648	58.9238	58.9111	63.3031	47.9245	63.1695	78.2193	56.1454	42.2652
TN1070	6-({5,7-dihydroxy-2-[4-hydroxy-3-(sulfooxy)phenyl]-4-oxo-4H-chromen-3-yl}oxy)-3,4,5-trihydroxyoxane-2-carboxylic acid	HMDB0128154	C21H18O16S	73.7082	73.7082	559.039	141.962	182.059	609.981	226.886	105.563	88.8441	153.357	135.676	81.3013	249.648	188.447	74.446	66.8701	574.287	171.425	69.9957	27.5155	61.4137	28.1711	206.98	70.7071	221.966	38.593	64.8701	70.1924	58.2756	78.7852	92.7062	47.948	76.8057	97.195	97.3199
RP2775	3,5,7-trihydroxy-2-(4-hydroxy-3,5-dimethoxyphenyl)-5H-chromen-5-yl	HMDB0128141	C17H15O7	103.911	103.911	332.088	51.7583	68.6482	70.5173	94.9189	118.064	89.91	129.888	134.583	112.549	165.338	132.498	77.234	69.608	92.6173	24.936	105.813	122.936	113.864	132.013	183.827	167.299	81.9435	85.6811	74.0279	127.332	112.312	120.888	107.735	199.997	155.514	96.3314	70.6302
RP3331	[2-hydroxy-6-methoxy-4-(3,5,7-trihydroxy-5H-chromen-2-yl)phenyl]oxidanesulfonic acid	HMDB0128140	C16H13O10S	70.6709	70.6709	420.013	83.3664	83.1705	45.5406	28.1087	106.511	89.8504	63.5169	62.9273	93.2937	33.6653	58.5986	109.681	90.1006	41.0486	83.9553	74.7428	60.2288	99.7566	60.547	37.0495	61.8902	19.573	71.0833	67.0358	98.1563	87.7841	90.4875	81.5921	76.9351	67.8257	87.9822	72.7023
TN2146	3,4,5-trihydroxy-6-[3-hydroxy-2-methoxy-4-(3,5,7-trihydroxy-5H-chromen-2-yl)phenoxy]oxane-2-carboxylic acid	HMDB0128131	C22H21O13	231.512	231.512	476.094	307.16	223.617	141.155	99.3254	142.078	77.4193	171.666	74.4197	260.818	59.9156	227.519	149.819	42.2795	90.4308	147.928	124.312	213.16	141.159	129.725	115.968	155.54	152.431	196.8	152.849	211.357	227.237	164.139	237.218	116.016	136.85	87.3838	105.167
TN1277	[2-methoxy-4-(3,5,6,7-tetrahydroxy-8aH-chromen-2-yl)phenyl]oxidanesulfonic acid	HMDB0128127	C16H13O10S	222.905	222.905	398.035	91.7223	41.2918	136.484	51.6664	85.7805	45.6123	121.535	47.6977	70.041	61.6604	74.0374	38.691	25.2823	57.954	70.6871	29.8893	35.996	29.3775	40.322	109.497	62.2406	21.63	52.2605	29.2227	27.3228	48.8733	56.2856	46.0851	77.6188	71.2792	84.2667	55.2343
RP975	3,4,5-trihydroxy-6-[2-methoxy-4-(3,5,6,7-tetrahydroxy-8aH-chromen-2-yl)phenoxy]oxane-2-carboxylic acid	HMDB0128126	C22H21O13	261.163	261.163	516.09	49.7138	60.0877	52.0894	70.0956	51.7362	38.3384	57.3952	51.4863	37.2822	47.7364	33.2745	34.4539	24.1067	42.8456	23.5719	27.9944	19.0745	18.5343	37.191	38.2066	31.8149	42.4838	31.9774	19.8445	21.1144	16.5277	28.0194	30.7087	15.179	22.1506	25.4437	22.4875
TN794	[2-methoxy-4-(3,5,7-trihydroxy-5H-chromen-2-yl)phenyl]oxidanesulfonic acid	HMDB0128122	C16H13O9S	113.063	113.063	364.024	107.225	72.9835	68.6	66.5966	75.6223	75.748	65.5671	59.4473	81.7412	55.7403	72.0355	69.1429	38.0556	68.7869	70.5619	71.4407	96.9332	93.0244	83.0967	79.5113	80.7935	78.3308	75.1476	75.7222	94.1116	95.4561	83.8292	102.67	143.578	80.8578	91.4283	84.9681
RP1724	[4-(5,7-dihydroxy-3-{[3,4,5-trihydroxy-6-(hydroxymethyl)oxan-2-yl]oxy}-5H-chromen-2-yl)-2-methoxyphenyl]oxidanesulfonic acid	HMDB0128118	C22H23O14S	70.0384	70.0384	582.042	54.0616	15.1076	118.777	23.7299	30.3144	24.9621	28.175	32.4321	31.2057	71.0463	13.4218	13.8739	15.2526	111.182	46.7584	24.3917	23.1732	23.2817	22.6938	14.3227	21.1559	14.8822	14.3394	15.2411	23.8335	14.9256	19.8558	18.6609	20.4845	17.0459	27.1199	19.0765
TN1793	{2-methoxy-5-[3-oxo-3-(2,4,6-trihydroxyphenyl)propyl]phenyl}oxidanesulfonic acid	HMDB0128073	C16H16O9S	313.104	313.104	407.041	76.9482	78.3757	70.8048	70.8951	67.9768	72.953	65.8146	73.9682	65.9511	77.3705	68.5816	70.9923	55.5907	75.075	71.5221	63.9876	68.4176	68.8695	70.0061	68.5278	75.6673	80.703	73.7954	83.1365	75.8919	59.554	74.7423	73.698	70.9424	74.5761	80.8409	80.7352
RP1987	3,4,5-trihydroxy-6-({3-[3-methoxy-4-(sulfooxy)phenyl]prop-2-enoyl}oxy)oxane-2-carboxylic acid	HMDB0128060	C16H18O13S	72.8234	72.8234	473.039	27.9067	20.0704	29.3811	22.3141	30.16	29.5141	33.0545	56.1513	28.5584	20.3406	18.782	30.8346	28.9116	17.4504	31.1754	24.6617	32.2306	26.0152	30.4989	27.4622	33.7893	13.9777	28.2328	40.8214	29.1585	32.4714	32.4184	74.1019	27.7156	38.09	44.85	30.9838
RP1180	3,4,5-trihydroxy-6-(2-hydroxy-3-methoxyphenoxy)oxane-2-carboxylic acid	HMDB0128036	C13H16O9	605.279	605.279	317.087	93.4561	79.8586	131.498	112.343	114.883	107.692	103.444	111.522	97.595	219.474	94.0903	80.3493	92.2337	109.977	87.357	94.3184	88.6483	74.7565	67.2614	109.702	107.022	84.6751	80.3528	84.622	83.6201	56.5533	99.4005	47.7437	75.4931	83.7418	75.289	69.4803
RP1221	6-(3-ethyl-5-methoxyphenoxy)-3,4,5-trihydroxyoxane-2-carboxylic acid	HMDB0128035	C15H20O8	603.564	603.564	311.113	212.668	155.859	251.6	236.667	230.152	213.24	235.13	235.721	223.376	212.896	189.353	194.933	205.196	219.939	181.703	205.072	213.659	2313.45	3440.94	247.66	3094.49	165.812	174.704	2573.07	218.538	202.067	234.198	125.199	186.012	193.722	192.241	178.325
RP2451	6-[5-(2-carboxyethyl)-2,3-dihydroxyphenoxy]-3,4,5-trihydroxyoxane-2-carboxylic acid	HMDB0128011	C15H18O11	266.09	266.09	397.074	49.8485	42.6688	81.5273	55.4662	64.9132	63.3331	57.0229	70.9617	81.9827	42.2363	142.199	51.8926	67.1149	53.6683	59.3155	83.1551	66.4168	62.5262	49.5524	79.0816	71.5384	62.1908	76.5936	79.8507	81.5496	65.6827	79.0883	68.7203	85.7303	100.327	87.8096	92.5032
TN694	2-{[hydroxy(3-methoxyphenyl)methylidene]amino}acetic acid	HMDB0127991	C10H11NO4	259.771	259.771	232.059	982.621	919.601	908.67	819.491	932.938	824.699	940.649	891.996	1017.06	980.433	1108.15	925.294	656.187	896.931	981.866	945.452	945.796	956.099	963.234	827.548	1030.41	1014.41	1185.08	1040.51	1180.6	1158.85	1001.06	975.916	1032.03	1141.59	1109.12	1070.17
RP2510	3-[3-methoxy-4-(sulfooxy)phenyl]oxirane-2-carboxylic acid	HMDB0127977	C10H10O8S	217.105	217.105	308.046	65.5601	59.862	78.5246	63.4643	67.5906	70.8215	79.5746	106.951	62.8977	128.497	80.7565	68.4182	70.479	58.7768	58.4788	61.3115	56.6919	60.3995	58.7787	147.785	79.8872	52.3662	63.2632	81.0644	61.1544	56.1232	64.6202	46.2162	84.8518	85.5828	77.7279	97.6431
RP3171	2-[(6-carboxy-3,4,5-trihydroxyoxan-2-yl)oxy]-3-hydroxybutanedioic acid	HMDB0127956	C10H14O12	128.196	128.196	327.055	228.638	274.244	219.035	242.632	192.072	150.017	144.893	129.213	178.341	298.926	263.584	244.069	300.103	221.523	248.916	200.6	212.734	130.786	160.373	223.52	253.42	359.688	232.753	238.218	152.072	130.951	105.009	382.065	153.659	226.137	232.606	227.438
TN1214	[2-hydroxy-5-(3,5,7-trihydroxy-5H-chromen-2-yl)phenyl]oxidanesulfonic acid	HMDB0127940	C15H11O9S	149.721	149.721	390.004	51.3467	94.0745	37.4554	48.2322	41.82	101.473	45.2057	76.9499	42.5248	86.4819	55.7967	78.4226	62.8226	71.6693	48.9703	69.4176	41.3274	67.0481	34.2166	33.6503	50.2547	30.1199	53.2672	40.6684	89.9241	46.9821	47.0228	53.0937	38.0192	53.811	42.6232	44.9333
TN2471	6-{[2-(3,4-dihydroxyphenyl)-3,7-dihydroxy-8aH-chromen-5-yl]oxy}-3,4,5-trihydroxyoxane-2-carboxylic acid	HMDB0127939	C21H19O12	88.5742	88.5742	502.055	42.8172	79.7259	78.5925	84.1397	63.1517	93.6124	67.1047	96.7611	47.5257	78.1384	52.5684	60.6544	116.272	70.6526	53.0546	64.4973	85.1624	72.7782	103.885	119.57	75.7998	96.9758	54.9169	101.218	65.3143	50.6781	63.5244	30.3459	78.2668	85.6199	80.1053	116.457
RP2976	2-{[5,7-dihydroxy-2-(4-hydroxy-3-methoxyphenyl)-5H-chromen-3-yl]oxy}-6-(hydroxymethyl)oxane-3,4,5-triol	HMDB0127935	C22H23O11	132.634	132.634	486.114	175.632	267.373	237.418	262.009	192.315	160.446	166.635	133.366	113.218	196.837	206.225	236.013	264.263	239.715	282.317	216.466	231.242	154.653	164.471	151.88	217.947	424.129	238.572	246.607	160.377	172.073	61.6915	174.929	114.657	196.315	207.071	193.083
RP2880	6-{[2-(3,4-dihydroxyphenyl)-7-hydroxy-3-{[3,4,5-trihydroxy-6-(hydroxymethyl)oxan-2-yl]oxy}-8aH-chromen-5-yl]oxy}-3,4,5-trihydroxyoxane-2-carboxylic acid	HMDB0127933	C27H29O17	75.6081	75.6081	664.106	115.105	137.803	167.514	193.455	196.779	191.991	285.878	210.197	197.474	204.841	153.275	125.311	142.847	162.816	139.443	149.222	171.831	230.064	205.263	205.513	136.871	172.293	134.463	146.942	179.584	207.037	179.74	174.825	164.819	153.898	166.498	178.698
TN1649	6-[4-(5,7-dihydroxy-3-{[3,4,5-trihydroxy-6-(hydroxymethyl)oxan-2-yl]oxy}-5H-chromen-2-yl)-2-hydroxyphenoxy]-3,4,5-trihydroxyoxane-2-carboxylic acid	HMDB0127930	C27H29O17	255.005	255.005	590.128	85.6756	83.2342	88.9914	92.9252	57.3273	62.0096	119.487	54.5507	58.3532	59.7457	45.7485	48.4655	4.97376	66.4154	68.6305	57.2301	73.14	59.2047	32.9708	81.8073	73.9531	44.2915	36.4156	47.6234	44.164	47.1532	43.845	48.1761	58.558	78.9456	76.8863	49.0374
RP1285	3,5,7-trihydroxy-2-(3-hydroxyphenyl)-5H-chromen-5-yl	HMDB0127929	C15H11O5	119.489	119.489	294.048	57.5265	43.5687	36.8152	32.4133	39.4307	21.5427	17.279	15.8913	22.3354	25.488	31.4458	34.0143	49.223	16.4759	34.361	30.6959	28.8126	20.8876	84.7268	28.8828	55.8728	44.4861	51.5298	53.0095	27.8465	32.9023	85.3393	55.8955	46.6076	40.347	51.1376	58.6179
TN501	(6-{[5,7-dihydroxy-2-(3-hydroxyphenyl)-5H-chromen-3-yl]oxy}-4,5-dihydroxyoxan-3-yl)oxidanesulfonic acid	HMDB0127927	C20H19O12S	278.019	278.019	506.06	45.1308	62.2433	53.6242	54.507	44.8023	34.6089	48.0769	40.7209	35.8423	58.1003	30.9538	34.9677	17.138	38.2751	18.8974	27.2574	25.3526	18.2893	31.2664	38.6228	30.4092	35.5538	34.5432	24.8238	27.0968	25.499	22.8038	26.6606	20.8705	17.3154	17.1013	15.4126
RP2296	(2-{[5,7-dihydroxy-2-(3-hydroxyphenyl)-5H-chromen-3-yl]oxy}-4,5-dihydroxyoxan-3-yl)oxidanesulfonic acid	HMDB0127926	C20H19O12S	72.5586	72.5586	466.058	103.798	85.1695	101.593	119.052	104.803	111.567	147.54	144.617	140.977	131.688	104.681	118.416	100.88	107.364	109.907	127.673	145.791	127.568	146.113	116.737	151.263	120.425	150.539	104.722	146.253	133.725	118.153	121.509	91.1422	92.7511	118.325	101.1
TN2587	3,4,5-trihydroxy-6-{[5-hydroxy-2-(3-hydroxyphenyl)-3-[(3,4,5-trihydroxyoxan-2-yl)oxy]-5H-chromen-7-yl]oxy}oxane-2-carboxylic acid	HMDB0127922	C26H27O15	73.8709	73.8709	602.127	18.4921	442.066	333.866	162.002	21.0614	17.2032	65.5172	78.7699	18.5903	2203.69	524.259	22.2664	15.5027	786.975	115.136	26.7361	15.2583	16.9879	12.8121	394.669	41.9441	1881.21	18.2333	33.8409	16.6163	14.5167	12.2195	16.6055	14.9654	55.3542	23.0519	80.9184
RP3189	2-{[5,7-dihydroxy-2-(4-hydroxy-3-methoxyphenyl)-5H-chromen-3-yl]oxy}oxane-3,4,5-triol	HMDB0127920	C21H21O10	118.429	118.429	472.077	75.5189	64.0251	55.7495	55.6857	81.344	43.1331	56.4475	50.0952	74.6117	50.8046	76.7911	72.5794	106.745	40.5138	58.0703	65.3096	61.6993	74.8352	107.93	66.3556	69.0117	62.9162	62.2034	66.5258	50.7919	71.3471	78.0854	97.8604	94.1002	73.6033	75.8386	56.3248
TN808	6-(5-{5,7-dihydroxy-3-[(3,4,5-trihydroxyoxan-2-yl)oxy]-5H-chromen-2-yl}-2-hydroxyphenoxy)-3,4,5-trihydroxyoxane-2-carboxylic acid	HMDB0127913	C26H27O16	312.861	312.861	560.131	18.0104	18.2401	19.2816	17.8452	17.2684	17.5952	16.9831	18.0744	22.7532	23.2704	24.4682	20.6462	7.87368	23.58	23.662	23.5108	18.3121	20.1448	22.6886	21.7213	23.4701	25.6859	18.3479	23.8477	25.236	28.2358	25.551	25.4781	20.6345	28.2146	29.1736	29.8961
RP2967	2-{[5,7-dihydroxy-2-(3-hydroxyphenyl)-5H-chromen-3-yl]oxy}oxane-3,4,5-triol	HMDB0127911	C20H19O9	125.802	125.802	386.103	163.01	118.616	111.776	110.562	113.024	49.3108	29.6741	29.3712	45.5834	69.4199	57.66	90.6439	137.329	89.2072	115.191	105.165	86.8599	27.6182	45.682	81.567	166.35	131.326	149.158	163.034	54.8661	22.0347	39.4126	51.4159	68.76	80.2399	90.1362	125.93
TN817	6-({2-[4-ethyl-3-(sulfooxy)phenyl]-3,5-dihydroxy-3,4-dihydro-2H-1-benzopyran-7-yl}oxy)-3,4,5-trihydroxyoxane-2-carboxylic acid	HMDB0127889	C23H26O14S	312.44	312.44	559.113	54.2985	61.4407	66.3822	61.5245	54.7985	52.8881	56.3124	58.0749	71.8921	78.6699	80.8402	60.31	17.1802	71.816	77.341	69.6892	67.1344	62.7186	53.6	70.0442	83.1607	85.512	73.4813	76.5962	74.8147	81.7814	80.7023	73.49	67.6491	97.0104	93.555	90.337
TN2179	6-{[2-(4-ethyl-3-hydroxyphenyl)-3,5-dihydroxy-3,4-dihydro-2H-1-benzopyran-7-yl]oxy}-3,4,5-trihydroxyoxane-2-carboxylic acid	HMDB0127867	C23H26O11	75.0309	75.0309	501.136	42.2001	32.3644	43.2455	23.7239	47.5814	33.3006	38.572	34.5331	36.4027	37.2055	38.5791	33.7005	8.68616	44.0772	45.3031	33.8791	28.7299	29.0477	23.291	38.1485	45.3987	35.5817	31.3046	25.2242	39.3413	35.5161	31.0471	37.7518	30.5538	52.868	63.2687	40.7814
TN2260	6-({2-[2,5-dihydroxy-4-(methoxymethyl)phenyl]-3,5-dihydroxy-3,4-dihydro-2H-1-benzopyran-7-yl}oxy)-3,4,5-trihydroxyoxane-2-carboxylic acid	HMDB0127855	C23H26O13	78.7756	78.7756	475.127	38.0999	190.599	196.171	117.944	59.6935	29.688	87.833	92.4342	42.5621	448.285	259.038	39.3439	11.3302	290.57	127.67	45.5893	40.5937	38.8001	26.3878	216.248	68.9769	422.474	28.6749	54.3115	35.0877	23.6237	37.2175	27.6066	29.1102	109.942	57.6454	98.4454
RP3048	{[1-(3-hydroxy-4-methoxyphenyl)-3-(2,4,6-trihydroxyphenyl)propan-2-yl]oxy}sulfonic acid	HMDB0127836	C16H18O9S	132.552	132.552	387.075	115.167	88.2618	101.606	97.2985	106.127	81.5614	106.466	111.573	89.0661	61.6262	68.2487	155.668	117.058	79.9781	67.9091	86.7035	113.58	128.436	155.125	84.4494	91.3966	81.2294	107.455	86.667	88.714	71.6798	77.0772	48.5826	136.062	83.6044	88.1284	68.3128
TN1907	3-{7-[(6-carboxy-3,4,5-trihydroxyoxan-2-yl)oxy]-3-hydroxy-5-sulfino-3,4-dihydro-2H-1-benzopyran-2-yl}benzen-1-olate	HMDB0127814	C21H22O12S	242.267	242.267	463.071	18.4849	79.8584	66.0814	100.466	49.2918	15.7448	70.2188	55.7419	46.8379	89.7382	209.329	36.339	24.5904	109.143	100.687	73.3122	110.941	17.5702	11.1273	51.8014	107.807	162.06	50.1793	37.0523	91.333	96.3996	30.6215	136.166	16.7651	84.9632	62.6054	39.4003
RP753	3-(3,7-dihydroxy-5-sulfino-3,4-dihydro-2H-1-benzopyran-2-yl)-5-methoxybenzen-1-olate	HMDB0127800	C16H16O7S	261.45	261.45	370.095	39.6212	34.4918	39.2947	57.8997	49.5745	41.935	55.769	45.4951	72.3771	50.0744	52.9532	43.4638	57.3748	52.9494	57.8536	47.092	59.7386	67.2526	60.5698	65.9544	71.3612	63.2261	72.8707	65.6323	111.7	76.5989	101.391	60.9271	60.9531	87.4858	93.9158	76.8971
TN2524	5-(4-hydroxy-3-methoxyphenyl)-4-(sulfooxy)pentanoic acid	HMDB0127779	C12H16O8S	78.9347	78.9347	321.064	493.852	181.799	219.807	246.764	424.894	304.616	388.689	297.395	424.632	88.9937	233.867	394.3	52.2174	151.754	323.953	426.232	267.123	239.427	259.341	194.446	402.018	122.849	488.644	288.05	381.782	368.751	229.744	466.542	208.257	316.692	415.234	207.303
RP2281	4-hydroxy-5-[3-methoxy-4-(sulfooxy)phenyl]pentanoic acid	HMDB0127778	C12H16O8S	117.376	117.376	359.022	63.8999	54.812	39.1102	48.3169	58.4693	42.4842	42.5375	44.7036	40.7599	38.2597	43.3975	52.9826	53.936	29.3362	37.6312	44.3829	49.3783	40.7336	42.7804	36.054	69.7075	50.514	46.5687	59.2645	42.5072	53.8644	46.0173	37.4506	48.1187	53.3339	49.1823	54.9202
TN2438	{[1-(4-hydroxy-3-methoxyphenyl)-3-(2,4,6-trihydroxyphenyl)propan-2-yl]oxy}sulfonic acid	HMDB0127774	C16H18O9S	74.8478	74.8478	409.057	39.9655	116.337	132.186	184.974	43.4448	85.768	91.9018	129.816	27.4244	119.923	187.536	95.4629	33.1172	192.418	130.953	92.9687	92.7057	24.7115	55.9107	196.513	121.986	176.313	40.1757	129.324	30.1443	44.2089	29.8138	33.8758	67.9855	152.282	39.0622	168.037
TN2641	5-(3,4-dihydroxyphenyl)-4-(sulfooxy)pentanoic acid	HMDB0127747	C11H14O8S	93.8084	93.8084	307.05	1099.01	705.631	1619.68	653.519	1196.63	572.764	1232.3	649.473	830.395	1241.76	955.145	502.972	529.578	730.22	855.483	525.638	600.797	702.747	538.086	1319.4	1392.91	986.286	959.723	813.769	568.82	596.238	566.01	1078.25	724.401	945.949	1589.94	1025.49
TN96	6-{[(16S)-5,7-dihydroxy-10-(hydroxymethyl)-8,8,12,16-tetramethyl-3-[1-(2-methyl-1,3-thiazol-4-yl)prop-1-en-2-yl]-9-oxo-17-oxa-4-azabicyclo[14.1.0]heptadec-4-en-11-yl]oxy}-3,4,5-trihydroxyoxane-2-carboxylic acid	HMDB0127576	C33H50N2O12S	1233.64	1233.64	699.323	44.0341	38.6189	52.0304	52.608	53.9789	49.6393	41.5664	54.9242	62.0517	59.9354	41.6273	38.2456	9.74962	42.3692	19.5193	21.3445	1.46241	1.571	2.31032	2.81579	2.82675	2.50841	1.83764	1.17584	2.83441	1.4256	1.95324	1.1957	1.73437	1.70716	1.68326	1.63859
TN922	[(1S,16R)-5,7-dihydroxy-8,8,10,12,16-pentamethyl-3-[1-(2-methyl-1,3-thiazol-4-yl)prop-1-en-2-yl]-9-oxo-17-oxa-4-azabicyclo[14.1.0]heptadec-4-en-11-yl]oxidanesulfonic acid	HMDB0127540	C27H42N2O8S2	604.62	604.62	609.225	18.3727	28.09	37.9845	67.6402	28.5275	19.397	48.1231	49.135	30.5365	6.88272	62.2601	7.74275	4.53834	17.6179	17.4335	55.7413	9.60145	7.19253	29.6855	16.0014	28.9172	11.9267	9.0489	12.5265	86.9098	9.75279	24.1606	18.9659	43.8082	18.7452	11.0844	14.1218
TN880	11-[(2R,3S)-3-[2-amino-3-methyl-4-(2-methyl-1,3-thiazol-4-yl)but-3-en-1-yl]-2-methyloxiran-2-yl]-3,7-dihydroxy-4,4,6,8-tetramethyl-5-oxoundecanoic acid	HMDB0127524	C27H44N2O6S	878.392	878.392	547.287	478.197	342.929	495.724	403.234	432.966	463.599	454.461	252.233	198.981	203.365	181.334	178.242	111.649	190.686	148.125	158.487	237.584	301.492	223.076	259.933	230.671	184.546	216.924	210.878	198.692	231.023	213.746	142.463	227.25	167.073	147.324	120.874
TN814	6-({6-[({4,5-dihydroxy-6-methyl-3-[(3,4,5-trihydroxy-6-methyloxan-2-yl)oxy]oxan-2-yl}oxy)methyl]-2,4,5-trihydroxyoxan-3-yl}oxy)-3,4,5-trihydroxyoxane-2-carboxylic acid	HMDB0127467	C24H40O20	312.117	312.117	649.219	7.47802	10.7316	14.8953	13.3592	11.0736	6.48034	11.9538	10.7579	20.5567	19.9228	29.4015	11.7582	1.75438	20.6644	14.8955	21.0183	17.069	14.2372	9.39265	20.7948	27.1474	25.3103	18.1747	16.6127	25.771	31.3255	25.3439	22.5617	17.6415	49.8891	34.2159	35.2867
TN857	3,4,5-trihydroxy-6-({4-hydroxy-2-methyl-6-[(3,4,5,6-tetrahydroxyoxan-2-yl)methoxy]-5-[(3,4,5-trihydroxy-6-methyloxan-2-yl)oxy]oxan-3-yl}oxy)oxane-2-carboxylic acid	HMDB0127460	C24H40O20	604.7	604.7	671.199	9.52044	20.3732	24.873	46.1469	17.3414	14.9602	32.7392	33.4496	18.9961	3.13137	40.4445	2.86939	1.41095	10.7656	9.74773	38.6062	5.85698	3.36112	18.8539	7.53234	16.5519	8.10875	4.1362	5.30461	56.9088	3.66262	14.0885	10.4885	31.159	10.0238	4.80687	5.73922
RP2389	2-(2,4-dihydroxy-5-methoxyphenyl)-5-hydroxy-8,8-dimethyl-4H,8H-pyrano[3,2-g]chromen-4-one	HMDB0127441	C21H18O7	86.9017	86.9017	421.065	45.7763	56.9652	61.9197	79.0567	68.7514	84.4786	86.6025	86.2686	91.4001	71.6421	66.4811	70.4946	61.5738	52.9579	76.0442	88.9084	99.8697	87.9483	104.994	84.2519	83.3839	84.2377	69.2252	71.4558	87.9916	106.224	96.2634	42.4048	45.7649	71.4786	69.3928	58.6545
RP3095	6-(3-{3,5-dihydroxy-8,8-dimethyl-4-oxo-4H,8H-pyrano[2,3-f]chromen-2-yl}phenoxy)-3,4,5-trihydroxyoxane-2-carboxylic acid	HMDB0127417	C26H24O12	128.411	128.411	511.123	96.6967	67.4055	68.5316	51.9072	64.909	34.2947	33.1472	37.567	30.259	70.7018	51.8704	69.1813	93.0372	67.5405	60.8934	59.4173	66.6816	39.8186	45.673	71.1616	130.771	82.75	66.5852	86.029	43.1219	21.5217	33.326	39.9333	82.4115	57.6872	54.8183	60.5745
TN2066	3,4,5-trihydroxy-6-({3-hydroxy-8,8-dimethyl-4-oxo-2-phenyl-4H,8H-pyrano[2,3-f]chromen-5-yl}oxy)oxane-2-carboxylic acid	HMDB0127416	C26H24O11	375.72	375.72	495.128	30.9253	23.3234	50.7086	59.3821	24.6129	31.2257	37.6272	54.8009	63.4488	90.258	136.001	69.8157	24.1351	97.6629	90.6262	127.498	61.3628	43.9667	52.9804	43.5911	90.5613	89.6141	16.0477	49.4678	76.9943	45.7267	52.5112	59.2692	58.6356	61.5821	19.5261	42.2778
TN1426	{4-[3,5-dihydroxy-8-(hydroxymethyl)-8-methyl-4-oxo-4H,8H-pyrano[2,3-f]chromen-2-yl]phenyl}oxidanesulfonic acid	HMDB0127413	C20H16O10S	222.183	222.183	471.036	307.86	345.699	420.414	226.589	283.736	207.79	411.152	204.9	266.697	250.311	265.186	175.978	113.616	228.25	263.116	140.772	165.788	221.903	175.969	427.58	241.869	112.901	235.213	238.926	135.963	196.253	257.275	203.474	264.125	275.489	273.77	241.894
TN2537	{2-[5,7-dihydroxy-2-(4-hydroxyphenyl)-4-oxo-4H-chromen-6-yl]-6-methyl-5-oxo-3-[(3,4,5-trihydroxy-6-methyloxan-2-yl)oxy]oxan-4-yl}oxidanesulfonic acid	HMDB0127345	C27H28O16S	135.918	135.918	641.116	49.0561	53.7824	79.1586	53.7218	60.3565	24.4346	76.1474	26.7914	86.4196	32.3523	72.6506	23.8721	38.7653	33.447	83.6513	49.4114	74.442	31.179	80.6944	56.4121	67.8027	87.9403	72.733	57.6532	35.167	75.9683	52.6659	74.3576	55.0488	39.798	61.6995	50.0208
RP2961	6-{4-[6-(3,4-dihydroxy-6-methyl-5-oxooxan-2-yl)-5,7-dihydroxy-4-oxo-4H-chromen-2-yl]-2-methoxyphenoxy}-3,4,5-trihydroxyoxane-2-carboxylic acid	HMDB0127333	C28H28O16	132.672	132.672	643.123	39.0228	50.0296	48.1341	58.8045	43.8113	29.1911	34.6652	9.67104	15.3667	42.9451	38.1827	57.3962	66.0509	68.0854	69.6504	60.5864	66.2101	42.4037	19.4754	29.6042	56.9931	80.4295	58.9632	58.3825	46.3469	53.4101	8.01797	34.3459	21.435	55.6922	63.8351	49.1947
TN1061	{3-[6-(3,4-dihydroxy-6-methyl-5-oxooxan-2-yl)-5,7-dihydroxy-4-oxo-4H-chromen-2-yl]phenyl}oxidanesulfonic acid	HMDB0127327	C21H18O12S	222.324	222.324	533.007	296.138	342.255	399.495	192.883	278.751	211.286	396.906	211.757	252.655	249.439	262.677	171.024	108.153	220.921	250.892	131.955	156.536	202.845	154.467	401.459	218.401	101.802	221.114	222.01	125.8	177.361	232.61	184.161	246.531	253.117	256.119	237.512
TN1337	[5-(5,7-dihydroxy-6-{4-hydroxy-6-methyl-5-oxo-3-[(3,4,5-trihydroxy-6-methyloxan-2-yl)oxy]oxan-2-yl}-4-oxo-4H-chromen-2-yl)-2-hydroxyphenyl]oxidanesulfonic acid	HMDB0127314	C27H28O17S	234.679	234.679	695.062	8.44772	63.4243	67.9369	56.6171	19.296	4.21565	61.7723	38.739	7.89365	110.386	79.8505	22.537	12.4716	102.534	61.444	15.0774	2.17038	0.802793	2.20527	74.0783	31.1934	64.0143	7.86689	26.5517	1.68563	1.47948	1.98491	3.53423	3.1937	42.0347	6.4059	51.2836
RP1774	{2-[5,7-dihydroxy-2-(3-hydroxyphenyl)-4-oxo-4H-chromen-8-yl]-3,5-dihydroxyoxan-4-yl}oxidanesulfonic acid	HMDB0127306	C20H18O12S	71.302	71.302	465.05	525.832	356.695	430.876	503.995	341.165	319.124	585.54	491.286	608.589	435.028	455.307	551.222	436.063	409.8	434.992	489.68	697.439	420.087	638.747	460.779	563.044	602.033	695.674	440.977	571.662	617.486	569.568	559.22	234.669	336.673	419.997	299.485
RP2466	6-{[2-(3,4-dihydroxyphenyl)-5-hydroxy-4-oxo-8-(3,4,5-trihydroxyoxan-2-yl)-4H-chromen-7-yl]oxy}-3,4,5-trihydroxyoxane-2-carboxylic acid	HMDB0127289	C26H26O16	74.8205	74.8205	612.159	12.872	101.908	83.0107	41.9241	43.6253	17.5519	37.8799	41.1741	46.9601	344.176	99.2042	42.5675	37.0574	153.26	68.323	43.7905	25.8463	16.4552	51.2708	88.2529	54.6311	169.732	17.9342	26.2027	22.8188	17.8482	56.5296	41.2337	40.5614	37.0537	26.507	45.6964
RP3218	[2-(5,7-dihydroxy-4-oxo-2-phenyl-4H-chromen-8-yl)-4,5-dihydroxyoxan-3-yl]oxidanesulfonic acid	HMDB0127265	C20H18O11S	129.281	129.281	467.068	151.093	170.982	137.168	116.077	141.318	92.9674	84.5982	70.008	84.0307	193.424	130.492	153.315	188.087	121.671	146.772	135.696	149.005	77.5866	86.0823	223.367	161.247	188.759	143.523	166.23	89.599	51.9401	48.1233	98.1149	99.9973	131.135	133.006	152.75
RP1887	3,4,5-trihydroxy-6-{[7-methoxy-4-oxo-2-phenyl-8-(3,4,5-trihydroxyoxan-2-yl)-4H-chromen-5-yl]oxy}oxane-2-carboxylic acid	HMDB0127259	C27H28O14	220.218	220.218	559.15	397.824	453.11	1166.1	702.9	395.928	145.721	314.676	69.2878	94.0313	1308.18	495.115	361.486	837.911	532.359	437.484	278.824	46.6239	36.6386	36.0148	1026.95	358.421	212.687	206.086	228.137	48.9434	36.0473	58.703	215.594	317.601	709.959	832.806	809.731
RP1958	5,7-dihydroxy-2-(4-hydroxyphenyl)-8-(3,4,5-trihydroxyoxan-2-yl)-4H-chromen-4-one	HMDB0127225	C20H18O9	259.906	259.906	420.129	174.886	185.545	129.987	149.963	153.282	177.734	128.776	136.639	60.1617	54.7195	59.6314	177.466	123.474	115.049	148.188	139.992	142.278	123.791	170.762	65.2198	126.381	141.407	103.102	154.223	69.2359	136.192	57.2518	149.711	121.769	56.655	100.939	98.5609
RP1872	6-({5,6-dihydroxy-4-oxo-2-phenyl-8-[3,4,5-trihydroxy-6-(hydroxymethyl)oxan-2-yl]-4H-chromen-7-yl}oxy)-3,4,5-trihydroxyoxane-2-carboxylic acid	HMDB0127192	C27H28O16	121.629	121.629	631.125	154.336	125.26	95.5307	107.606	103.009	51.8362	24.9505	28.9903	136.912	46.0358	91.9685	128.327	133.314	81.085	87.2364	84.9954	76.5933	47.335	60.9318	61.0759	127.828	123.71	119.932	120.785	71.0852	59.4822	156.439	153.868	174.103	167.681	189.014	150.437
RP2348	{2-[5,7-dihydroxy-2-(4-hydroxyphenyl)-4-oxo-6-[3,4,5-trihydroxy-6-(hydroxymethyl)oxan-2-yl]-4H-chromen-8-yl]-3,5-dihydroxy-6-(hydroxymethyl)oxan-4-yl}oxidanesulfonic acid	HMDB0127084	C27H30O18S	90.0039	90.0039	657.118	54.5499	82.5092	70.1521	83.2462	81.496	64.9835	68.5733	79.9444	81.5344	56.7216	86.669	77.2187	86.4701	68.6344	57.9341	59.7125	74.9963	70.7416	64.2269	75.7334	87.8675	82.8438	69.4563	82.0992	73.5148	85.16	43.5049	64.628	72.5979	85.3092	77.8814	82.7838
TN2392	3,4,5-trihydroxy-6-({7-hydroxy-4-oxo-2-phenyl-3,6-bis[3,4,5-trihydroxy-6-(hydroxymethyl)oxan-2-yl]-4H-chromen-5-yl}oxy)oxane-2-carboxylic acid	HMDB0127032	C33H38O20	257.344	257.344	719.184	52.8033	49.4732	51.1997	37.9109	47.4421	38.0375	54.0575	35.3233	52.7451	42.1193	54.8356	34.5651	11.2426	45.6941	60.678	44.1639	57.6919	35.0805	37.2955	44.4225	58.1184	36.7907	49.3357	37.7034	38.7841	55.0362	34.0837	52.4982	38.4939	48.2583	53.4516	39.7781
TN2241	5-hydroxy-2-(4-hydroxy-3-methoxyphenyl)-6,8-bis[3,4,5-trihydroxy-6-(hydroxymethyl)oxan-2-yl]-7-[(3,4,5-trihydroxy-6-methyloxan-2-yl)oxy]-4H-chromen-4-one	HMDB0126987	C34H42O20	257.988	257.988	793.223	23.3745	20.944	14.4078	10.0092	21.1644	7.97842	25.8197	10.8012	19.304	10.1377	16.5889	12.6727	4.69116	12.2177	20.2704	11.6434	20.0406	11.453	15.5581	11.1127	17.3761	12.8265	13.948	13.9011	19.7457	24.1857	12.3646	13.6264	16.6942	12.2767	15.5078	10.8494
TN1628	{2-[2-(3,4-dihydroxyphenyl)-5-hydroxy-4-oxo-6-[3,4,5-trihydroxy-6-(hydroxymethyl)oxan-2-yl]-7-[(3,4,5-trihydroxy-6-methyloxan-2-yl)oxy]-4H-chromen-8-yl]-4,5-dihydroxy-6-(hydroxymethyl)oxan-3-yl}oxidanesulfonic acid	HMDB0126981	C33H40O23S	134.351	134.351	875.136	37.977	30.8069	42.1528	35.1302	44.0033	17.8506	43.132	18.3016	47.6763	33.5557	53.5707	20.3357	32.5159	48.3825	38.9279	20.2504	40.6605	25.4703	46.3636	39.3853	58.3271	50.2382	52.2685	45.5614	46.1429	57.0885	20.9482	51.5277	28.9431	48.0568	44.3038	47.2397
TN1183	{2-[5,7-dihydroxy-2-(3-hydroxyphenyl)-4-oxo-8-(3,4,5-trihydroxyoxan-2-yl)-4H-chromen-6-yl]-4,5-dihydroxy-6-(hydroxymethyl)oxan-3-yl}oxidanesulfonic acid	HMDB0126921	C26H28O17S	312.571	312.571	627.101	32.7492	39.2752	38.259	37.3327	36.6177	36.1194	36.271	45.0564	41.2232	45.6547	48.4629	37.2792	15.393	47.3212	41.091	45.1173	43.4335	40.0804	36.4241	40.6879	46.3791	49.0915	45.5129	44.9915	47.2185	45.1917	43.4258	46.1253	36.4536	47.2591	55.7017	52.8978
TN1011	[(6-{5,7-dihydroxy-4-oxo-2-phenyl-6-[3,4,5-trihydroxy-6-(hydroxymethyl)oxan-2-yl]-3,4-dihydro-2H-1-benzopyran-8-yl}-3,4,5-trihydroxyoxan-2-yl)methoxy]sulfonic acid	HMDB0126875	C27H32O17S	224.325	224.325	625.123	123.554	41.0818	374.974	69.9621	158.325	33.9699	343.209	35.7194	92.9159	68.3731	116.404	23.0855	27.2485	64.2503	101.589	28.6965	21.1826	14.0333	33.7125	165.387	99.1464	10.5046	36.3155	17.6399	10.3457	46.0436	23.5115	56.7668	92.3176	74.9121	167.332	56.8006
RP1150	{6-[5,7-dihydroxy-2-(4-hydroxyphenyl)-4-oxo-8-[3,4,5-trihydroxy-6-(hydroxymethyl)oxan-2-yl]-3,4-dihydro-2H-1-benzopyran-6-yl]-4,5-dihydroxy-2-(hydroxymethyl)oxan-3-yl}oxidanesulfonic acid	HMDB0126870	C27H32O18S	72.9081	72.9081	715.097	10.6708	15.1995	12.8243	12.0282	19.2942	16.2906	16.5047	21.4773	14.9469	8.50442	13.7663	12.7875	14.8979	13.8527	9.12918	16.1719	20.6904	15.272	23.3227	13.3948	24.83	11.7544	17.2905	14.6595	30.4669	30.8863	16.5078	25.2078	14.6844	33.607	27.7475	15.7518
TN1700	4-[2-(3,4-dihydroxyphenyl)-3,5,7-trihydroxy-3,4-dihydro-2H-1-benzopyran-8-yl]-2-(3-hydroxyphenyl)-8-[3,4,5-trihydroxy-6-(hydroxymethyl)oxan-2-yl]-3,4-dihydro-2H-1-benzopyran-3,5,7-triol	HMDB0126803	C36H36O16	257.677	257.677	725.218	45.9618	41.9875	42.5108	30.7165	29.4131	13.1619	48.0765	26.546	27.1221	20.0124	21.4578	18.7346	4.92986	20.4576	35.6613	18.1482	29.7325	15.204	21.4365	22.2548	32.3415	19.2065	26.5298	21.6002	19.4926	22.6556	24.9645	24.0406	23.6828	15.5147	33.7428	23.9083
RP1735	[4,5-dihydroxy-6-(hydroxymethyl)-2-[3,5,6,7-tetrahydroxy-2-(3-hydroxyphenyl)-3,4-dihydro-2H-1-benzopyran-8-yl]oxan-3-yl]oxidanesulfonic acid	HMDB0126744	C21H24O14S	245.228	245.228	550.125	56.1933	26.7474	57.3683	57.2795	71.6963	49.737	49.0625	49.4163	26.9103	58.4113	28.4514	25.4861	29.2023	64.7277	57.1025	33.9745	65.3081	67.959	72.4991	111.34	77.911	79.2865	71.7493	86.3655	41.3813	70.9735	55.951	24.6469	90.4862	126.106	106.362	105.446
TN1344	({3,4,5-trihydroxy-6-[3,5,7-trihydroxy-2-(2,4,5-trihydroxyphenyl)-3,4-dihydro-2H-1-benzopyran-8-yl]oxan-2-yl}methoxy)sulfonic acid	HMDB0126726	C21H24O15S	92.4478	92.4478	531.082	87.8731	52.9218	130.124	49.8521	119.262	49.2359	131.516	56.6283	80.7882	105.229	94.3674	29.7374	86.7904	43.8086	86.0056	78.8993	28.4949	42.7654	27.0843	72.7897	80.875	81.4028	135.832	44.4391	48.1879	38.4189	36.4766	70.7402	40.7787	33.8782	100.866	59.7755
TN2594	6-[3,4,5-trihydroxy-6-(hydroxymethyl)oxan-2-yl]-2-(2,4,5-trihydroxyphenyl)-3,4-dihydro-2H-1-benzopyran-3,5,7-triol	HMDB0126678	C21H24O12	132.874	132.874	451.125	84.0919	52.8718	100.772	56.7622	77.3588	37.9012	81.8889	55.5497	65.4022	60.0464	140.818	46.4994	36.2617	56.1468	109.884	72.4113	67.9329	74.5258	50.5301	72.214	69.5433	83.3978	81.1798	74.4755	92.0933	75.0098	89.6933	86.8077	70.3723	82.0045	72.8575	96.4276
RP2339	6-({1-carboxy-4,8,9,10-tetrahydroxy-6-oxo-6H-benzo[c]chromen-3-yl}oxy)-3,4,5-trihydroxyoxane-2-carboxylic acid	HMDB0126670	C20H16O15	77.8217	77.8217	479.051	25.5129	114.755	111.972	109.032	32.2103	73.0073	85.4965	83.4468	35.1867	103.331	122.6	52.519	48.3049	111.245	65.3546	45.2351	30.3385	74.4919	36.3609	127.416	63.2024	145.422	32.617	52.3709	75.9836	67.1856	79.4437	26.3866	33.0984	42.0014	21.7016	72.1019
RP2226	3,4,8,9,10-pentahydroxy-6-oxo-6H-benzo[c]chromene-1-carboxylic acid	HMDB0126633	C14H8O9	62.8641	62.8641	358.98	47.108	51.82	62.908	71.6418	66.8366	58.2131	68.4613	58.8046	66.7795	53.1834	68.3361	67.709	65.3457	71.2053	72.6634	77.3603	78.801	71.553	74.6842	56.5885	60.1793	51.0059	62.0665	71.2838	84.942	73.9348	70.7975	66.8042	77.5466	54.8262	74.7798	64.7828
TN2122	2-amino-4-({1-[(carboxymethyl)-C-hydroxycarbonimidoyl]-2-({2,3,4,6-tetrahydroxy-5-[(2E)-3-(4-hydroxyphenyl)prop-2-enoyl]phenyl}sulfanyl)ethyl}-C-hydroxycarbonimidoyl)butanoic acid	HMDB0126628	C25H27N3O12S	257.23	257.23	616.124	41.4494	32.905	43.5086	39.4233	41.5241	28.6048	45.5202	28.8624	42.4287	38.1681	46.8515	29.2684	10.8294	35.5461	41.768	35.6572	43.9773	31.0708	40.9443	38.1758	50.1083	39.167	39.0561	37.6333	33.7077	39.9836	35.226	35.1821	37.8484	46.6004	51.133	38.4123
TN2324	2-amino-4-({1-[(carboxymethyl)-C-hydroxycarbonimidoyl]-2-({2,3,6-trihydroxy-5-[(2E)-3-(4-hydroxyphenyl)prop-2-enoyl]-4-{[3,4,5-trihydroxy-6-(hydroxymethyl)oxan-2-yl]oxy}phenyl}sulfanyl)ethyl}-C-hydroxycarbonimidoyl)butanoic acid	HMDB0126624	C31H37N3O17S	258.069	258.069	720.172	28.1805	30.4935	33.4665	26.8427	24.6064	18.8536	37.3596	25.0229	35.6027	18.2712	36.2961	26.476	7.73372	21.3255	33.4799	28.1931	29.4588	20.1917	19.3526	23.3452	25.4791	24.4974	24.2841	20.9314	29.0961	35.3944	21.9542	23.8002	26.4966	29.7011	27.5	23.6679
TN2177	3,4,5-trihydroxy-6-{[3-hydroxy-2-(4-hydroxyphenyl)-4-oxo-7-[(3,4,5-trihydroxy-6-methyloxan-2-yl)oxy]-4H-chromen-5-yl]oxy}oxane-2-carboxylic acid	HMDB0126556	C27H28O16	94.7686	94.7686	609.145	40.096	59.2965	60.9046	88.8849	35.1505	64.4476	44.7452	79.5842	71.2566	143.977	79.3941	73.5212	9.67395	114.062	105.299	86.8234	70.7616	72.2247	53.7942	102.004	37.9557	139.72	37.8773	64.7627	80.4347	60.1617	61.6696	38.2843	56.6677	100.857	26.7099	46.9166
TN1796	3,4,5-trihydroxy-6-[(oxolan-2-yl)methoxy]oxane-2-carboxylic acid	HMDB0126546	C11H18O8	68.1045	68.1045	317.063	61.5039	51.5678	50.8909	42.0475	65.5659	67.032	39.492	46.6428	65.2781	71.1225	65.968	61.5873	31.2812	44.2422	70.495	33.543	39.4031	77.1656	60.223	45.9357	30.5105	60.304	65.0418	60.6174	46.0269	92.9166	98.7357	76.38	42.5834	97.8949	110.282	61.8492
RP3143	3,4,5-trihydroxy-6-{[1-hydroxy-2-(phenylmethylidene)heptan-3-yl]oxy}oxane-2-carboxylic acid	HMDB0126523	C20H28O8	579.551	579.551	414.216	104.337	74.1601	190.931	120.575	162.414	79.8428	110.449	153.584	115.994	162.661	149.74	162.419	107.15	75.8942	185.63	243.75	97.4243	118.966	159.511	113.054	248.654	143.212	105.245	107.68	197.867	170.193	122.541	122.215	112.087	108.327	153.894	157.978
RP1321	2,2-dimethyl-2H-chromen-5-ol	HMDB0126379	C11H12O2	242.218	242.218	194.117	449.587	522.476	466.82	468.468	479.182	493.093	447.629	426.945	438.466	373.22	417.169	454.268	482.827	509.234	545.548	528.738	559.917	543.686	512.83	398.979	455.236	483.025	633.008	563.569	529.84	500.648	478.604	435.92	446.598	446.738	564.389	519.787
RP3126	6-(2,4-dihydroxyphenyl)-2-{3-[(2E)-3-(2,4-dihydroxyphenyl)prop-2-enoyl]-2,6-dihydroxyphenyl}-4-methylcyclohex-3-ene-1-carboxylic acid	HMDB0126378	C29H26O9	126.733	126.733	557.121	230.346	161.35	433.952	299.238	368.712	139.498	100.376	95.0214	299.126	276.887	286.991	170.912	507.59	328.524	855.333	470.635	237.898	105.379	119.685	317.355	252.876	517.307	411.638	433.202	218.977	178.862	136.598	253.101	226.507	339.889	473.245	436.756
TN1893	3-(2,4-dihydroxyphenyl)-1-{3-[5-(2,4-dihydroxyphenyl)-6-(5-hydroxy-2,2-dimethyl-2H-chromene-6-carbonyl)-3-methylcyclohex-2-en-1-yl]-2,4-dihydroxyphenyl}propan-1-one	HMDB0126375	C40H38O10	464.149	464.149	643.233	27.2045	34.5091	29.3725	56.0353	22.3824	21.6372	20.9453	22.766	24.4018	13.0527	65.7877	29.9145	29.2615	17.818	26.204	43.5984	27.942	17.9458	24.0373	25.7949	36.8753	27.9693	26.2007	34.0592	75.7055	17.7032	4.89193	57.6035	44.6168	15.8536	3.31694	10.7424
TN1059	2-{6-[2,4-dihydroxy-3-(3-methylbut-2-en-1-yl)benzoyl]-5-(2,4-dihydroxyphenyl)-3-methylcyclohex-2-en-1-yl}-5-[(E)-2-(2,4-dihydroxyphenyl)ethenyl]-4-methoxybenzene-1,3-diol	HMDB0126353	C40H40O10	488.312	488.312	645.251	115.679	135.43	64.7437	110.04	95.8142	76.713	119.642	85.5987	107.083	88.6148	141.252	89.0552	70.4694	95.4287	71.3406	87.4866	92.6695	65.4901	71.0358	87.3205	115.028	93.8352	100.847	83.1569	130.043	67.2001	73.3935	95.2778	112.404	87.8263	45.4091	69.4484
TN2321	2-{6-[2,4-dihydroxy-3-(3-methylbut-2-en-1-yl)benzoyl]-5-(2,4-dihydroxy-5-methoxyphenyl)-3-methylcyclohex-2-en-1-yl}-5-[(E)-2-(2,4-dihydroxyphenyl)ethenyl]benzene-1,3-diol	HMDB0126343	C40H40O10	563.878	563.878	703.259	20.81	11.1397	17.1755	25.7489	14.941	10.0325	11.9509	19.6842	21.3401	9.6335	19.1993	14.061	13.8636	11.8197	12.2088	17.7365	21.3692	10.2368	21.2286	30.2223	19.2849	14.4821	12.7802	25.4563	28.6612	12.9275	12.5328	28.9195	17.8271	17.2486	9.18955	9.85187
TN42	6-[(2-{4-[6-carboxy-5-(2,4-dihydroxyphenyl)-6-hydroxy-3-methylcyclohex-2-en-1-yl]-3,5-dihydroxyphenyl}-7-(3-methylbut-2-en-1-yl)-1-benzofuran-6-yl)oxy]-3,4,5-trihydroxyoxane-2-carboxylic acid	HMDB0126239	C39H40O15	824.618	824.618	749.25	53.8922	35.6019	42.7486	39.3477	38.2413	44.4331	46.8309	55.5749	44.4814	48.0536	56.0531	52.8623	21.5751	53.3198	55.6538	57.9716	20.1207	14.9485	34.7683	43.1349	33.0096	26.2164	30.5925	29.1187	17.1229	14.5849	16.3291	11.2961	8.72966	19.0697	16.2005	28.185
RP1658	2-{2,6-dihydroxy-4-[6-hydroxy-7-(3-methylbut-2-en-1-yl)-1-benzofuran-2-yl]-3-methoxyphenyl}-6-(2,4-dihydroxyphenyl)-4-methylcyclohex-3-ene-1-carboxylic acid	HMDB0126228	C34H34O9	387.664	387.664	569.213	45.5532	61.3417	28.1159	59.9587	46.0089	23.6765	40.1647	30.3331	45.1578	29.3723	67.8073	24.4909	51.0684	37.127	22.9786	34.5626	31.5788	25.4216	32.5059	42.5	33.9149	41.0481	32.548	40.8352	64.075	22.8696	27.686	41.1563	48.6414	30.9401	18.0003	24.749
RP2563	2-amino-4-({1-[(carboxymethyl)-C-hydroxycarbonimidoyl]-2-({5,10-dihydroxy-8,8-dimethyl-2-oxo-4-phenyl-2H,8H,9H,10H-pyrano[2,3-h]chromen-9-yl}sulfanyl)ethyl}-C-hydroxycarbonimidoyl)butanoic acid	HMDB0126128	C30H33N3O11S	264.888	264.888	666.176	144.19	209.002	122.073	175.373	123.576	137.804	138.897	148.561	147.539	104.283	172.397	221.214	112.425	118.01	101.588	143.464	178.226	145.99	153.926	113.461	142.627	162.481	167.283	157.64	125.461	92.3766	107.41	135.108	130.075	99.7878	71.6688	78.8287
RP1170	2-amino-4-({1-[(carboxymethyl)-C-hydroxycarbonimidoyl]-2-({5,9-dihydroxy-8,8-dimethyl-2-oxo-4-phenyl-2H,8H,9H,10H-pyrano[2,3-h]chromen-10-yl}sulfanyl)ethyl}-C-hydroxycarbonimidoyl)butanoic acid	HMDB0126127	C30H33N3O11S	783.917	783.917	626.179	26.8164	33.4562	49.1531	36.4131	42.4233	41.2379	28.0402	45.8884	36.014	43.5398	30.7425	41.8247	30.7858	50.0181	34.4367	37.1127	23.1824	20.6715	14.8759	80.0825	56.5386	17.7686	38.1497	37.4496	25.6039	11.1745	26.6739	13.3911	11.2309	34.9894	48.476	25.7142
RP3045	(4-{5-hydroxy-8,8-dimethyl-2-oxo-2H,8H-pyrano[2,3-f]chromen-4-yl}phenyl)oxidanesulfonic acid	HMDB0126125	C20H16O8S	77.7966	77.7966	434.087	29.4801	134.215	100.348	65.237	41.1242	28.7104	60.6174	51.0349	31.0353	158.824	99.5117	32.8468	35.9813	164.169	50.4288	39.2826	60.1832	28.0557	28.3462	75.1732	49.8411	206.906	39.9571	48.0653	49.9594	41.7988	41.5303	42.7597	39.3296	46.8288	40.83	69.1165
TN2212	2-amino-4-({1-[(carboxymethyl)-C-hydroxycarbonimidoyl]-2-{[5,9-dihydroxy-8,8-dimethyl-6-(2-methylpropanoyl)-2-oxo-4-phenyl-2H,8H,9H,10H-pyrano[2,3-h]chromen-10-yl]sulfanyl}ethyl}-C-hydroxycarbonimidoyl)butanoic acid	HMDB0126106	C34H39N3O12S	563.862	563.862	696.237	108.086	67.878	95.2356	111.49	79.2809	51.2619	67.3985	73.7914	103.037	50.3425	126.476	64.5996	67.7766	71.5138	66.153	72.8785	96.1881	46.1581	101.998	120.304	95.1758	64.3416	46.04	102.524	111.961	50.6138	47.3552	104.175	85.5235	71.5796	47.5137	42.1974
TN2631	{4-[5-hydroxy-8,8-dimethyl-6-(2-methylpropanoyl)-2-oxo-2H,8H-pyrano[2,3-f]chromen-4-yl]phenyl}oxidanesulfonic acid	HMDB0126104	C24H22O9S	259.474	259.474	487.104	163.472	135.186	157.935	113.744	153.412	113.997	150.351	132.985	166.587	128.028	166.994	137.262	105.489	190.001	155.651	140.425	123.607	128.77	144.683	168.753	163.061	119.44	162.723	134.319	154.07	155.529	134.552	125.322	141.105	141.229	149.93	128.915
TN1268	5-hydroxy-4-(2-hydroxyphenyl)-8,8-dimethyl-6-(2-methylpropanoyl)-2H,8H-pyrano[2,3-f]chromen-2-one	HMDB0126082	C24H22O6	235.51	235.51	429.126	451.552	3136.23	5089.89	3210.68	1119.5	432.976	2997.01	2391	633.148	5624.34	4678.67	1322.95	610.759	6331.72	3255.94	974.005	103.272	16.9975	10.0888	4857.52	1668.62	3022.88	487.829	1274.44	118.583	38.265	61.9793	331.686	50.8343	2456.77	416.093	2471.55
TN725	6-{[5,7-dihydroxy-2-(3-hydroxy-2,2-dimethyl-3,4-dihydro-2H-1-benzopyran-6-yl)-4-oxo-4H-chromen-3-yl]oxy}-3,4,5-trihydroxyoxane-2-carboxylic acid	HMDB0126014	C26H26O13	125.419	125.419	569.127	49.3506	31.3802	41.9297	37.4818	36.2959	30.6769	41.5703	26.4078	37.1697	28.0909	33.8917	33.8992	8.89744	29.4598	35.8056	31.3099	38.3702	40.7125	30.5209	44.8999	44.9026	48.6997	41.1497	38.6806	47.0307	42.0249	54.1159	51.0076	39.7676	60.3686	50.2566	44.8352
RP3203	({4-[4,6-dihydroxy-3-(6-hydroxy-3-oxo-2,3-dihydro-1-benzofuran-2-yl)-2-methoxyphenyl]-2-methylbut-2-en-1-yl}oxy)sulfonic acid	HMDB0125974	C20H20O10S	248.867	248.867	475.066	46.8922	61.1085	88.2066	69.5464	38.4605	36.6991	72.4461	45.1187	35.1615	47.7188	35.1468	40.5469	29.7431	73.8724	68.8036	38.7324	54.9975	41.2299	25.5027	83.3866	57.73	40.6783	33.5453	47.4361	45.4636	29.9756	45.6805	39.767	37.6811	69.4712	74.6021	49.4791
TN842	2-amino-4-({1-[(carboxymethyl)-C-hydroxycarbonimidoyl]-2-({4-hydroxy-6-[3-(4-hydroxyphenyl)-3-oxopropyl]-5-methoxy-2,2-dimethyl-3,4-dihydro-2H-1-benzopyran-3-yl}sulfanyl)ethyl}-C-hydroxycarbonimidoyl)butanoic acid	HMDB0125909	C31H39N3O11S	769.147	769.147	626.223	36.7625	35.977	26.9119	27.1115	32.1172	41.0308	20.9327	24.8215	22.9781	20.8805	21.5351	24.714	10.3477	24.8859	22.5954	19.3259	25.8015	28.2307	25.5917	30.6435	31.5948	34.956	38.3789	35.2842	31.5433	40.9303	36.1848	24.1801	36.2255	28.1997	15.5044	34.1095
RP419	3,4,5-trihydroxy-6-{4-[1-hydroxy-3-(5-methoxy-2,2-dimethyl-2H-chromen-6-yl)propyl]phenoxy}oxane-2-carboxylic acid	HMDB0125905	C27H32O10	599.939	599.939	499.195	83.2278	58.4519	65.8954	54.1706	70.6484	55.4262	82.2843	64.0701	62.298	72.7531	60.8284	65.2908	54.7116	63.9662	58.0274	83.1343	48.3846	52.6817	37.6633	53.2455	46.6146	31.949	34.4992	42.7884	49.7102	40.0674	38.6264	37.9916	34.1431	43.112	23.3164	47.244
TN677	2-amino-4-({1-[(carboxymethyl)-C-hydroxycarbonimidoyl]-2-({4-hydroxy-6-[3-(4-hydroxyphenyl)-3-oxoprop-1-en-1-yl]-5-methoxy-2,2-dimethyl-3,4-dihydro-2H-1-benzopyran-3-yl}sulfanyl)ethyl}-C-hydroxycarbonimidoyl)butanoic acid	HMDB0125884	C31H37N3O11S	772.787	772.787	624.209	182.934	131.761	163.307	134.441	115.327	112.727	138.835	110.604	96.2598	95.5004	97.2949	79.2306	33.0473	91.9164	70.3754	74.1784	125.036	139.158	147.453	165.756	154.078	121.946	145.812	145.095	157.263	146.841	162.77	86.2672	163.261	151.413	117.628	106.525
TN2600	3-(5-hydroxy-2,2-dimethyl-2H-chromen-6-yl)-1-phenylpropan-1-one	HMDB0125856	C20H20O3	140.503	140.503	347.105	397.059	378.49	291.879	277.681	267.157	268.435	241.808	408.887	198.61	184.584	139.448	524.473	100.013	300.255	152.203	244.373	263.72	445.268	348.054	363.161	180.136	330.178	264.141	280.06	241.063	143.234	257.138	178.69	384.075	234.401	147.731	242.073
RP303	3-(7-hydroxy-5-methoxy-2,2-dimethyl-2H-chromen-6-yl)-1-phenylprop-2-en-1-one	HMDB0125853	C21H20O4	520.08	520.08	319.136	10.64	147.86	119.477	241.389	223.853	182.588	173.505	203.318	199.248	163.922	114.843	111.564	151.297	139.769	126.296	137.588	11.6203	23.9872	29.5944	27.3639	43.1613	30.0798	28.3332	32.0385	36.765	10.0747	15.4729	12.9412	10.0205	14.1929	12.2003	11.1366
RP821	2-amino-4-[(2-{[1-carboxy-2-hydroxy-2-(4-hydroxyphenyl)ethyl]sulfanyl}-1-[(carboxymethyl)-C-hydroxycarbonimidoyl]ethyl)-C-hydroxycarbonimidoyl]butanoic acid	HMDB0125830	C19H25N3O10S	141.169	141.169	470.123	55.333	53.4904	84.062	81.2227	57.3835	71.8634	98.4991	98.7919	103.085	109.5	80.356	56.1341	66.0156	80.3491	81.2669	92.9843	111.532	130.663	137.447	105.148	150.556	89.2193	130.525	104.628	143.231	144.955	183.965	96.3791	148.627	102.485	149.218	122.799
TN1881	6-[(2-{[3,4-dihydroxy-2,5-bis(hydroxymethyl)oxolan-2-yl]oxy}-4,5-dihydroxy-6-(hydroxymethyl)oxan-3-yl)oxy]-3,4,5-trihydroxyoxane-2-carboxylic acid	HMDB0125620	C18H30O17	73.0422	73.0422	541.139	276.444	607.2	1043.97	230.462	190.355	159.676	200.94	177.905	97.0468	4007.48	722.714	36.5846	27.1452	1521.15	332.691	92.8005	52.208	66.1019	24.7269	494.013	63.93	1885.27	30.0961	82.3131	44.5811	43.0023	109.949	32.8255	68.7381	97.3472	35.7943	132.914
RP754	4-ethyl-6-methoxybenzene-1,2,3-triol	HMDB0125593	C9H12O4	271.05	271.05	202.107	202.589	134.634	231.695	219.207	168.472	203.328	236.687	208.955	235.461	208.386	224.892	200.369	209.589	210.917	209.993	252.676	254.013	254.552	240.226	253.201	247.631	218.022	263.071	243.064	275.522	236.829	272.335	191.933	276.544	289.711	305.647	200.289
RP2928	[7-(2,4-dihydroxyphenyl)-5-methoxy-2,2-dimethyl-8-oxo-2H,3H,4H,8H-pyrano[3,2-g]chromen-3-yl]oxidanesulfonic acid	HMDB0125583	C21H20O10S	236.272	236.272	465.083	13.6037	92.2945	93.4707	138.368	60.856	24.3199	93.9531	48.0704	44.1666	103.049	279.476	43.5038	142.608	131.607	154.885	105.338	170.499	18.3696	10.3422	53.0279	188.356	292.644	77.7633	67.4527	143.354	134.232	44.1187	119.072	27.7967	137.425	127.794	71.2695
TN1356	2-amino-4-({1-[(carboxymethyl)-C-hydroxycarbonimidoyl]-2-[(4-{4-[(E)-2-(2,4-dihydroxyphenyl)ethenyl]-2,6-dihydroxyphenyl}-3-hydroxy-2-methylbutan-2-yl)sulfanyl]ethyl}-C-hydroxycarbonimidoyl)butanoic acid	HMDB0125580	C29H37N3O11S	775.696	775.696	600.205	120.549	96.2342	123.636	93.5101	94.1483	86.6524	86.5365	84.5343	62.5307	86.6739	68.0037	51.1325	27.6878	74.778	54.058	53.1768	79.2155	86.2382	72.5123	111.797	113.685	76.0184	86.4059	92.6218	89.6097	76.6274	93.0561	65.352	84.5694	81.2372	86.6572	81.6943
TN2603	3,4,5-trihydroxy-6-({2-[2,4,6-trihydroxy-3-(3-methylbut-2-en-1-yl)phenyl]acetyl}oxy)oxane-2-carboxylic acid	HMDB0125495	C19H24O11	169.493	169.493	451.121	18.4479	383.869	125.656	354.652	34.4046	68.5579	108.553	336.633	58.5541	588.828	326.106	272.269	2.60425	768.583	288.126	301.982	71.9214	31.5593	15.6597	673.096	99.5024	787.234	87.383	341.487	105.921	16.8179	57.2559	28.9495	39.5656	534.774	26.7262	551.334
TN2586	6-[2-(carboxymethyl)-3,5-dihydroxy-6-(3-methylbut-2-en-1-yl)phenoxy]-3,4,5-trihydroxyoxane-2-carboxylic acid	HMDB0125494	C19H24O11	212.767	212.767	451.121	121.434	75.4198	419.29	62.1889	160.089	12.217	205.402	56.7339	111.752	103.912	436.839	80.4836	109.803	185.826	435.135	79.1396	35.5729	16.5253	27.8518	225.505	537.661	130.438	258.374	76.8047	31.3953	40.9273	19.073	130.017	34.7107	176.843	116.928	73.4013
TN999	2-[4,6-dihydroxy-2-methoxy-3-(3-methylbut-2-en-1-yl)phenyl]acetic acid	HMDB0125455	C14H18O5	590.653	590.653	289.104	102	143.456	127.611	91.0326	127.982	95.7688	131.065	133.919	127.129	122.808	125.503	95.8425	131.11	126.285	85.2794	83.2497	82.7292	89.8368	85.0218	89.2737	124.228	91.5206	130.407	88.0807	82.8194	122.376	97.6928	89.9165	92.9512	98.1647	132.339	91.1062
TN1396	3,4,5-trihydroxy-6-{[3,6,7-trihydroxy-4-oxo-2-(3,4,5-trihydroxyphenyl)-3,4-dihydro-2H-1-benzopyran-5-yl]oxy}oxane-2-carboxylic acid	HMDB0125292	C21H20O15	238.263	238.263	513.088	44.6571	214.112	257.995	161.416	57.2984	18.1033	157.622	101.938	30.0038	304.226	234.643	51.9185	30.4218	321.156	165.299	35.6316	10.3064	10.0117	11.0575	235.225	81.471	197.323	23.1534	49.2856	10.2829	14.4706	6.98353	22.1335	29.0784	112.224	14.0004	104.373
RP229	[3-(3,5,7-trihydroxy-4-oxo-4H-chromen-2-yl)phenyl]oxidanesulfonic acid	HMDB0125276	C15H10O9S	873.887	873.887	388.993	5.13629	3.77783	3.26109	3.09899	5.46529	5.4579	8.96944	8.30774	9.2182	4.77686	6.5814	8.42559	8.26075	8.97636	9.46561	17.9318	122.545	127.882	143.746	176.801	165.574	139.269	138.273	203.084	137.625	135.576	172.233	190.531	111.353	141.72	179.942	158.922
TN1149	6-{5-[2,3-dioxo-3-(2,4,6-trihydroxyphenyl)propyl]-2,3-dihydroxyphenoxy}-3,4,5-trihydroxyoxane-2-carboxylic acid	HMDB0125263	C21H20O14	105.083	105.083	479.083	49.8328	27.3914	69.6555	46.2376	52.2831	32.908	48.6981	46.7536	47.8227	66.9246	53.8805	44.9278	21.3549	63.277	41.8556	55.1304	41.2744	52.0652	38.7968	93.8827	76.5406	73.5804	54.1173	63.3896	58.9974	38.0257	43.8183	37.1296	80.883	100.554	90.1482	76.4818
TN978	benzene-1,2,3,5-tetrol	HMDB0125218	C6H6O4	454.514	454.514	180.99	163.67	146.772	155.777	151.465	152.013	155.159	149.16	159.991	149.299	147.693	143.333	154.058	155.374	153.701	151.861	136.439	150.233	163.781	151.546	145.238	146.458	154.12	161.641	159.205	138.118	164.109	178.654	141.796	139.799	170.127	183.113	169.894
RP2993	(3,4,5,6-tetrahydroxyoxan-2-yl)methyl acetate	HMDB0125202	C8H14O7	120.251	120.251	240.106	78.2182	71.875	80.7448	79.9597	77.9207	49.3668	36.9456	36.66	56.8987	43.6068	71.1661	62.9163	81.3831	54.3389	71.1141	71.5991	56.3638	38.5499	52.7424	77.1863	73.5706	90.7827	85.8537	74.6273	38.2955	43.8396	40.8655	73.1272	60.1823	66.7097	64.9794	57.9393
RP3310	({6-[(2-{4-[(6-carboxy-3,4,5-trihydroxyoxan-2-yl)oxy]-3-hydroxyphenyl}-7-hydroxy-5-oxo-5H-chromen-3-yl)oxy]-3,4,5-trihydroxyoxan-2-yl}methyl)[3-(3,4-dihydroxyphenyl)-1-hydroxyprop-2-en-1-ylidene]oxidanium	HMDB0125188	C36H35O20	285.196	285.196	787.168	65.1836	60.6277	88.5356	85.3192	83.1817	73.3225	86.5688	71.7831	97.8683	94.044	99.7147	95.1421	72.1981	87.271	102.669	95.3229	74.2876	79.8897	97.0764	79.6629	98.8076	105.128	88.5845	81.6823	90.9128	88.998	97.9232	90.9113	58.1911	84.7957	89.1234	76.0569
RP2991	{2-hydroxy-5-[(1E)-3-oxo-3-[(3,4,5,6-tetrahydroxyoxan-2-yl)methoxy]prop-1-en-1-yl]phenyl}oxidanesulfonic acid	HMDB0125186	C15H18O12S	74.7506	74.7506	423.056	51.9073	105.275	106.853	79.1373	42.1145	47.8161	60.1532	72.0733	34.7298	209.113	104.954	45.2303	55.4587	110.226	71.36	43.9961	44.3527	46.5593	46.4409	103.874	50.5016	179.103	47.7061	51.2473	36.8636	53.6733	47.1044	62.3283	44.2719	62.235	34.4451	65.1937
TN947	3,4,5-trihydroxy-6-{2-hydroxy-5-[(1E)-3-oxo-3-[(3,4,5,6-tetrahydroxyoxan-2-yl)methoxy]prop-1-en-1-yl]phenoxy}oxane-2-carboxylic acid	HMDB0125185	C21H26O15	129.173	129.173	501.127	40.6911	26.2368	44.3601	28.0091	45.0388	26.9598	50.3333	25.5787	45.7344	29.2593	50.7315	26.3904	13.8545	31.8077	49.3225	31.5703	42.1338	37.3865	48.6797	37.7448	45.9345	40.7694	44.924	39.619	40.9572	58.2396	42.6903	48.8888	42.3654	54.7349	49.1318	48.1833
TN2283	[3-(3,4-dihydroxyphenyl)-1-hydroxyprop-2-en-1-ylidene][(6-{[2-(3,4-dihydroxyphenyl)-7-hydroxy-5-oxo-5H-chromen-3-yl]oxy}-3,4,5-trihydroxyoxan-2-yl)methyl]oxidanium	HMDB0125178	C30H27O14	138.55	138.55	649.094	718.536	818.364	952.687	785.07	869.404	464.929	957.157	507.982	1056.95	526.607	988.889	518.224	636.883	698.505	1049.74	623.316	866.985	498.112	1044.77	865.195	935.598	1128.26	833.537	758.768	387.404	869.528	452.916	939.25	622.507	678.749	881.909	636.275
TN616	2-{[hydroxy(2,4,6-trihydroxyphenyl)methylidene]amino}acetic acid	HMDB0125157	C9H9NO6	73.6452	73.6452	266.009	51.4587	22.8025	39.1173	44.5127	33.7852	33.3833	53.1508	48.6189	63.1681	28.1064	47.3461	43.7728	52.8605	40.7897	41.4281	62.407	77.5409	69.0931	94.3066	52.9092	64.9351	41.1788	64.3786	56.5071	63.3761	85.7055	61.3456	65.9243	77.5303	57.7386	58.3209	65.3652
TN2759	6-{[2-(3,4-dihydroxyphenyl)acetyl]oxy}-3,4,5-trihydroxyoxane-2-carboxylic acid	HMDB0125150	C14H16O10	70.613	70.613	309.062	90.844	59.9604	83.2854	52.0197	85.9148	82.7409	55.1743	66.8901	69.0762	47.9517	61.0454	67.9184	36.0897	56.4288	74.5813	71.6095	63.9567	89.8701	85.5194	58.719	53.3805	48.5173	50.8712	64.2898	72.6776	103.237	86.3063	72.5903	83.9636	85.8779	77.1255	66.11
TN1378	{4-[(1E)-3-oxo-3-[(3,4,5,6-tetrahydroxyoxan-2-yl)methoxy]prop-1-en-1-yl]phenyl}oxidanesulfonic acid	HMDB0125132	C15H18O11S	74.1926	74.1926	371.045	49.2401	31.6165	65.9958	71.7643	66.7659	49.5574	93.3123	67.9532	92.9399	64.8967	87.6624	32.3888	20.7764	58.646	91.0925	93.9889	84.5536	61.7963	70.2188	91.838	64.4781	93.7235	72.7445	74.9533	94.03	105.262	105.988	90.3941	82.9045	78.8927	66.8106	87.006
TN2464	[(6-{[5,7-dihydroxy-2-(4-oxocyclohexa-2,5-dien-1-ylidene)-2H-chromen-3-yl]oxy}-3,4,5-trihydroxyoxan-2-yl)methyl][1-hydroxy-3-(4-hydroxy-3-methoxyphenyl)prop-2-en-1-ylidene]oxidanium	HMDB0125100	C31H29O13	133.274	133.274	609.159	36.9514	33.7238	47.1317	35.5611	67.1757	20.1758	68.0984	25.1551	101.406	35.2246	60.1727	26.1188	39.8998	29.9267	84.6652	24.9217	55.8567	21.7904	74.0052	41.4996	80.1328	77.0499	62.976	51.7501	32.4553	75.8647	25.9312	49.8879	57.2599	37.6046	75.0478	41.2092
TN2140	2-(2,5-dihydroxy-4-methoxyphenyl)-1-(2,3,4,6-tetrahydroxyphenyl)propan-1-one	HMDB0125080	C16H16O8	122.494	122.494	359.072	448.783	248.7	320.887	244.793	319.381	230.995	589.075	308.235	381.463	402.421	420.439	331.591	86.1683	426.21	471.989	328.976	480.505	283.452	708.763	390.191	458.356	362.278	511.857	455.126	299.47	288.6	346.716	226.386	581.842	494.341	424.04	327.432
RP1106	6,7-dihydroxy-3-(2,4,5-trihydroxyphenyl)-3,4-dihydro-2H-1-benzopyran-4-one	HMDB0125017	C15H12O7	118.429	118.429	343.022	233.599	195.507	135.93	167.509	288.564	303.234	189.461	182.451	217.341	144.123	204.432	215.173	205.899	115.329	140.07	132.057	313.415	309.123	271.255	185.241	240.223	213.299	184.38	216.895	343.468	306.536	291.732	229.955	319.026	249.563	281.706	258.633
RP3398	2-(7-hydroxy-6-methoxy-3,4-dihydro-2H-1-benzopyran-3-yl)-5-methoxybenzene-1,4-diol	HMDB0125012	C17H18O6	91.3105	91.3105	357.074	70.5523	69.4154	82.5519	130.474	127.516	107.467	121.219	123.014	123.801	135.331	113.594	101.284	88.636	101.443	90.5681	118.987	132.621	103.148	114.876	133.246	126.609	96.922	100.461	96.9667	142.308	128.448	131.346	132.975	87.9186	106.869	118.506	100.12
RP1509	(3-ethenylphenyl)oxidanesulfonic acid	HMDB0124988	C8H8O4S	183.906	183.906	223.007	51.9489	58.6093	63.5492	71.9055	31.527	61.1357	78.4005	85.2921	63.2682	97.1752	120.673	73.0832	91.4188	75.7354	58.663	54.3503	112.478	75.2426	35.6798	115.865	171.975	150.499	64.9561	57.1621	87.368	64.6164	64.318	66.9852	75.5201	158.58	93.2961	68.7564
TN237	(5-ethyl-2-hydroxyphenyl)oxidanesulfonic acid	HMDB0124986	C8H10O5S	615.138	615.138	256.99	98.7547	92.9993	89.5311	89.7998	89.3813	90.0511	84.2803	77.8	91.418	91.8361	85.6477	86.6715	88.0772	89.5844	88.4016	74.2134	91.452	94.6481	88.8889	91.5931	92.1262	95.2488	89.9235	95.6037	94.7098	94.3501	99.0057	96.8782	97.8467	100.559	96.5161	104.501
RP1891	2-{[(2E)-3-(3,4-dihydroxyphenyl)prop-2-enoyl]oxy}-3-[4-hydroxy-3-(sulfooxy)phenyl]propanoic acid	HMDB0124966	C18H16O11S	113.03	113.03	458.071	89.868	65.6058	83.6076	91.0384	69.4058	59.9174	96.5267	95.5041	101.36	88.4253	82.6445	92.2709	88.3807	52.4077	63.9765	90.0518	129.58	84.7597	127.481	120.499	122.894	91.0081	97.1225	96.3265	90.1139	78.2705	103.501	82.2045	123.662	71.5224	77.1323	68.1525
RP2997	3-(3,4-dihydroxyphenyl)-1-methoxy-1-oxopropan-2-yl (2E)-3-(4-hydroxy-3-methoxyphenyl)prop-2-enoate	HMDB0124950	C20H20O8	261.7	261.7	406.149	139.881	150.283	77.6559	88.0886	100.158	131.222	62.2671	91.847	28.4198	32.5395	38.1865	129.536	90.4187	107.835	80.3924	84.8867	133.648	65.511	103.537	27.199	111.847	122.709	84.1996	113.967	83.1834	99.404	39.0078	108.28	109.729	91.2171	41.0172	84.0709
TN2103	6-(carboxymethoxy)-3,4,5-trihydroxyoxane-2-carboxylic acid	HMDB0124938	C8H12O9	478.817	478.817	291.008	124.903	128.132	168.178	116.466	114.914	116.561	112.4	119.344	122.746	119.234	227.842	112.795	240.831	98.5354	118.23	105.893	102.867	130.8	112.843	119.448	113.054	121.124	127.309	117.087	116.825	274.154	142.79	270.777	122.081	290.842	266.926	127.435
RP2747	2-[(3,3-dimethyloxiran-2-yl)methyl]-5-methoxybenzene-1,3-diol	HMDB0124920	C12H16O4	81.538	81.538	247.094	66.7697	62.4736	99.8461	80.5724	130.074	90.8528	93.7146	95.1265	116.389	126.326	91.7677	63.004	71.6812	84.2556	103.04	117.631	94.0427	100.639	90.5717	233.941	100.168	82.9142	87.002	101.306	105.898	103.503	116.323	123.328	134.915	119.319	171.351	147.792
RP1147	{2,6-dimethoxy-4-[3-oxo-3-(2,4,6-trihydroxyphenyl)prop-1-en-1-yl]phenyl}oxidanesulfonic acid	HMDB0124891	C17H16O10S	74.6293	74.6293	430.082	60.0332	53.4873	56.3138	73.3568	63.5045	64.4117	78.5045	53.7088	65.6107	67.1291	70.963	52.7964	51.3713	77.6931	68.267	68.0009	95.9954	72.4761	80.8754	65.3555	68.6237	85.1094	78.4373	73.2186	114.872	97.4795	66.5638	66.8628	45.2635	57.5855	64.3907	72.0231
TN2503	6-(4-{8-[4,5-dihydroxy-6-(hydroxymethyl)-3-[(3,4,5-trihydroxy-6-methyloxan-2-yl)oxy]oxan-2-yl]-5,7-dihydroxy-4-oxo-3,4-dihydro-2H-1-benzopyran-2-yl}phenoxy)-3,4,5-trihydroxyoxane-2-carboxylic acid	HMDB0124769	C33H40O20	257.712	257.712	721.196	7.65997	13.1274	47.0994	10.602	9.08586	7.08222	11.1836	11.1668	10.3764	70.8551	56.2293	9.59321	2.59555	72.213	9.3441	14.3535	10.831	7.33676	7.17513	49.3987	11.108	47.1766	8.70675	10.2129	8.09841	11.6047	7.07214	11.9539	8.87983	12.537	8.55467	7.25679
TN2232	3,4,5-trihydroxy-6-[(2,3,5-trihydroxy-6-methyloxan-4-yl)oxy]oxane-2-carboxylic acid	HMDB0124752	C12H20O11	75.0996	75.0996	341.108	20.8594	681.839	723.856	334.282	69.8487	24.0175	213.679	229.47	28.8106	1982.34	765.175	60.3207	93.2877	984.02	260.304	60.9563	23.716	17.6449	12.85	658.38	144.024	1672.43	32.7798	104.349	23.3731	25.8161	21.2562	29.08	20.7639	193.447	29.1234	243.958
RP353	PE-NMe(20:3(5Z,8Z,11Z)/22:6(4Z,7Z,10Z,13Z,16Z,19Z))	HMDB0116727	C48H78NO8P	735.065	735.065	828.553	4.8073	7.56334	2.95951	5.39307	6.06196	1.85974	6.46094	6.65119	10.1919	57.2937	54.0618	165.399	199.939	240.805	325.856	286.023	2422.55	3017.34	2466.99	1398.91	1843.29	2068.76	1971.26	2062.9	2314.84	2064.43	1558.66	1616.42	1546.46	1337.64	1399.69	1654.9
TN741	PE-NMe2(22:4(7Z,10Z,13Z,16Z)/22:6(4Z,7Z,10Z,13Z,16Z,19Z))	HMDB0116716	C51H82NO8P	413.688	413.688	890.556	8.5264	6.26353	7.33251	5.33818	7.71873	6.70986	6.15848	9.79614	6.55079	7.56735	7.56449	6.58995	11.0292	7.57627	7.07548	7.79698	7.06766	7.6552	6.05812	6.69543	6.66863	4.94532	8.01761	5.67884	5.11178	5.16018	7.77281	6.70379	4.90975	6.16242	6.8531	5.60979
TN123	PA(22:1(13Z)/20:1(11Z))	HMDB0116706	C45H85O8P	416.532	416.532	823.569	147.218	144.692	124.733	125.039	123.999	120.241	121.844	115.998	120.474	126.814	124.129	127.409	121.629	118.907	123.955	124.29	114.084	114.513	104.849	116.499	116.346	107.777	113.689	105.321	105.588	112.385	115.113	112.882	108.618	105.4	104.27	105.097
RP642	PG(i-14:0/i-13:0)	HMDB0116694	C33H65O10P	860.016	860.016	675.42	11.1136	8.43309	12.0156	11.0682	11.5169	20.8759	17.5452	12.0508	22.0638	17.5181	14.0871	19.7881	21.6427	17.1417	15.6494	23.6009	75.6201	65.4098	76.9361	69.7557	88.6315	60.0321	89.7423	80.9766	84.7402	71.8377	81.9824	60.2795	65.1049	41.4777	50.7708	61.0924
RP1054	PG(i-13:0/i-19:0)	HMDB0116685	C38H75O10P	348.484	348.484	761.477	49.1367	48.6753	47.0785	43.2936	39.419	46.3719	50.3414	44.9454	54.9039	53.3652	47.6307	53.6707	49.8128	45.9996	44.9718	62.4238	56.3143	45.0725	45.8034	59.3848	60.2446	53.7907	60.6712	61.8687	59.2696	54.9299	58.1594	61.111	54.7112	56.5282	60.1065	57.1146
RP1186	PG(i-12:0/i-24:0)	HMDB0116671	C42H83O10P	852.294	852.294	761.572	5.99878	4.58086	6.33308	8.89566	80.9677	11.8676	9.9599	8.77939	129.188	15.8784	12.6478	13.2316	12.6376	13.1054	9.13389	12.5717	16.539	13.9273	16.5028	17.2551	15.0355	13.5942	65.0274	77.1502	354.346	495.119	613.142	574.088	544.363	520.848	485.975	414.599
RP278	PG(i-12:0/i-14:0)	HMDB0116662	C32H63O10P	318.904	318.904	621.415	204.301	199.582	195.454	178.558	193.984	196.402	191.21	211.395	192.725	218.929	195.997	198.661	206.83	192.046	195.956	191.603	208.276	217.768	221.822	208.131	221.921	222.583	236.886	229.558	218.285	211.046	220.902	219.208	212.299	199.391	220.695	217.7
TN2310	PG(a-13:0/i-24:0)	HMDB0116653	C43H85O10P	550.577	550.577	815.57	16.8727	67.5053	8.83496	66.4276	21.9457	16.7909	33.3992	13.4245	131.853	24.6051	281.659	30.4542	5.34862	93.102	41.2533	172.715	35.6184	7.76641	49.0225	48.277	65.0568	31.6779	42.3116	17.48	607.773	21.6657	24.2797	195.631	271.21	45.2475	3.82572	16.0506
TN517	PG(a-13:0/i-14:0)	HMDB0116644	C33H65O10P	399.408	399.408	691.399	27.2734	28.5832	24.6397	23.1625	24.4892	23.6325	25.0356	25.9055	23.7651	23.8598	22.3803	24.4964	27.2171	25.4316	23.8456	22.5749	22.035	23.8157	21.3749	20.6902	21.6756	22.486	22.5291	22.5653	21.2978	21.3032	21.681	22.3734	18.6836	19.0142	19.7732	21.7151
TN240	PG(a-13:0/i-12:0)	HMDB0116642	C31H61O10P	357.021	357.021	647.386	15.7944	19.0046	15.4959	13.3768	13.3848	12.4181	15.7322	13.5418	13.0988	11.9367	15.1115	14.3638	10.6584	12.5817	13.9985	15.2586	12.9142	11.0068	11.209	11.3129	11.8983	11.922	10.4349	10.7558	12.5015	11.7922	10.9564	13.2491	12.6335	11.7642	11.5085	10.8624
RP333	PG(20:4(5Z,8Z,11Z,14Z)/22:5(4Z,7Z,10Z,13Z,16Z))	HMDB0116611	C48H77O10P	780.846	780.846	845.532	1.2603	0	0.870036	2.50695	0.862743	3.00091	0	3.53101	9.82103	4.61971	2.22149	5.8734	5.27634	5.3692	5.297	7.78679	300.421	311.76	225.645	204.062	210.012	214.272	208.646	207.627	236.767	179.175	163.452	164.79	127.963	116.122	131.432	143.208
TN1105	PG(22:6(4Z,7Z,10Z,13Z,16Z,19Z)/20:3(5Z,8Z,11Z))	HMDB0116602	C48H77O10P	429.102	429.102	845.532	13.4848	11.8112	5.95714	9.22696	8.45495	8.25992	8.25851	9.37451	8.13962	8.21876	10.9328	9.67292	10.4606	8.90616	9.48704	7.98623	9.62531	7.59352	7.60326	10.732	10.252	9.00363	7.19232	6.70258	7.89657	8.44892	8.90942	7.00858	6.2558	7.62937	7.69208	6.78625
RP457	PG(20:4(8Z,11Z,14Z,17Z)/20:3(5Z,8Z,11Z))	HMDB0116594	C46H77O10P	780.408	780.408	821.534	2.62573	3.05927	1.83031	4.73555	3.07118	4.62933	4.74999	3.29262	1.54547	4.9299	3.81059	5.20482	11.5873	3.08175	11.6449	14.6904	45.6348	73.6186	187.594	289.231	233.286	265.143	261.581	225.287	157.837	156.906	136.421	194.429	135.376	124.996	153.289	162.09
TN709	PGP(i-14:0/i-13:0)	HMDB0116570	C33H66O13P2	618.801	618.801	733.403	24.7855	7.14593	14.0321	14.6017	16.4427	15.1562	8.24543	12.7758	7.93677	5.5462	12.6375	11.3132	0.899604	4.91154	7.77544	6.46026	19.3285	18.178	24.4856	21.7357	19.8443	10.2491	21.6662	14.9331	14.5164	20.803	14.8648	8.46938	28.2576	19.9115	15.1477	17.4184
TN528	PGP(i-14:0/a-13:0)	HMDB0116566	C33H66O13P2	376.476	376.476	697.374	21.2764	23.0864	21.5746	23.8701	21.4575	23.1718	24.2368	22.2551	23.4015	24.3081	24.0318	22.6686	19.8348	20.5333	21.0619	24.8832	20.9171	23.1141	22.4083	20.3383	23.9665	18.6933	21.8458	18.9553	22.3108	21.8725	21.9321	22.0203	21.6611	21.2973	19.7457	21.2872
TN1351	PGP(i-12:0/18:2(9Z,11Z))	HMDB0116530	C36H68O13P2	400.332	400.332	735.403	12.7348	14.3996	12.381	12.1987	13.7981	11.9391	11.055	13.1988	13.0738	11.4575	14.6926	14.0563	11.2787	12.9135	12.6958	13.3741	10.9892	12.1754	11.3404	14.2215	13.1139	13.3999	14.6881	11.9631	13.6341	13.4191	12.5941	15.0469	15.4537	11.5541	11.5568	11.6511
TN606	PGP(20:2(11Z,14Z)/18:2(9Z,12Z))	HMDB0116452	C44H80O13P2	286.793	286.793	843.495	13.8393	9.24806	21.8131	23.0836	9.44387	4.45474	14.4807	11.4076	19.4643	76.1855	53.5638	12.4334	1.85722	33.8206	55.4029	42.0014	42.8916	54.5971	15.3914	56.3905	113.896	100.627	143.212	89.1025	84.7343	166.548	59.8148	46.5875	8.23775	175.952	168.35	134.71
RP483	DG(9M5/11M5/0:0)	HMDB0116443	C43H72O7	774.528	774.528	723.513	36.536	25.5039	21.6205	24.085	32.1151	43.7859	38.2264	46.8643	59.2729	52.9451	64.5213	46.3488	27.5968	42.7183	39.467	39.4029	23.851	13.1233	20.4639	48.1457	16.505	27.5256	21.6757	28.9539	20.7551	18.1717	32.2196	17.4841	9.54176	20.9655	15.9398	22.9572
RP727	DG(9D3/9D3/0:0)	HMDB0116428	C39H64O7	633.069	633.069	627.467	2.13413	154.257	79.5719	192.424	167.558	80.1257	97.2009	229.421	228.24	230.872	210.275	187.853	211.302	211.409	172.94	177.392	59.3058	39.3994	64.3346	26.7477	66.2831	66.222	25.2447	38.9972	67.5137	29.7931	26.9265	119.902	26.4813	31.6694	82.3021	47.5652
TN309	PA(i-13:0/i-21:0)	HMDB0115808	C37H73O8P	419.735	419.735	715.471	33.1537	34.8715	25.3263	26.5846	27.5104	23.1698	26.0653	28.1226	26.7594	24.3177	28.1504	24.5554	23.2954	23.763	24.2418	23.474	20.8709	20.5624	21.0264	24.1362	20.8064	22.0193	21.752	22.2552	18.535	21.6733	20.7635	19.7153	19.6681	19.5433	21.8453	23.9155
RP349	PA(i-13:0/i-17:0)	HMDB0115804	C33H65O8P	856.766	856.766	659.406	17.7727	13.6867	25.354	13.6721	16.3348	20.233	15.8836	11.6147	24.6021	20.0613	27.9893	21.1192	34.9619	25.2843	19.5032	30.4216	55.5945	88.8182	205.046	216.634	203.264	183.542	195.54	165.271	144.52	122.695	142.817	118.269	138.012	152.562	132.985	118.656
RP2764	PA(i-12:0/i-12:0)	HMDB0115781	C27H53O8P	627.907	627.907	575.313	369.852	397.344	386.372	407.191	373.526	392.394	399.731	347.731	305.434	337.755	300.876	295.97	285.901	321.899	224.419	306.792	295.27	292.538	329.172	399.587	394.121	341.428	392.873	479.229	289.624	327.949	307.909	263.187	350.477	329.299	348.736	342.402
TN119	PA(a-13:0/a-17:0)	HMDB0115700	C33H65O8P	376.629	376.629	643.43	102.591	106.596	93.4792	93.1128	92.3588	95.2211	92.1829	93.1419	98.3035	92.6532	97.579	90.8863	86.019	88.1496	85.5207	86.3907	77.9036	78.1996	80.3744	80.7509	88.4736	83.3688	82.7966	81.2595	81.4549	83.93	83.2435	81.0301	76.9384	81.2387	80.5502	79.476
TN2654	PA(8:0/i-13:0)	HMDB0115686	C24H47O8P	447.365	447.365	517.289	90.9312	262.481	94.7207	154.08	110.139	64.9325	105.715	65.7051	137.125	214.283	354.04	67.7189	54.7173	95.0439	66.5685	135.913	45.6112	30.8379	59.0654	99.2841	128.691	130.219	68.4752	85.3433	640.837	55.7128	23.4753	133.043	323.744	54.9329	21.3679	44.0152
RP484	PA(8:0/a-15:0)	HMDB0115681	C26H51O8P	645.785	645.785	540.364	4.90454	179.751	119.851	180.977	201.36	198.727	202.458	231.591	210.136	223.107	192.559	198.416	166.138	203.597	138.277	187.392	61.7676	58.0797	59.707	48.4788	23.2913	63.2243	38.0728	30.7459	49.9085	32.6164	55.031	31.8324	31.0027	37.6895	49.6101	52.6323
TN1289	PA(22:0/a-15:0)	HMDB0115664	C40H79O8P	358.643	358.643	757.51	18.9242	21.055	15.3245	14.2734	14.7994	14.2086	13.0466	13.7583	15.1305	13.5296	13.2357	14.4873	11.9094	13.7442	11.3097	14.6536	13.6351	10.9559	12.0314	13.6069	12.484	12.7244	14.5513	13.3843	12.7495	15.0765	13.1058	12.1863	13.1703	12.7978	12.8896	13.7477
TN835	PA(24:1(15Z)/20:2(11Z,14Z))	HMDB0115604	C47H87O8P	415.606	415.606	849.577	7.13655	8.45371	6.56499	4.96851	5.54657	6.16239	6.98208	5.24891	7.10483	6.86096	7.06626	7.03391	4.82525	5.38188	5.8115	6.34477	5.37523	6.19541	4.75427	6.03476	7.7731	6.91913	4.02819	4.85754	4.14259	5.11198	6.58722	4.74911	5.16989	4.85051	5.75772	5.37106
RP398	PA(18:2(9Z,12Z)/20:3(8Z,11Z,14Z))	HMDB0115521	C41H71O8P	845.106	845.106	740.522	2.44284	0	2.23417	2.20945	1.60857	1.46554	5.60419	3.73295	8.64394	20.0482	13.4263	12.7522	45.7757	65.977	85.0944	126.309	720.646	700.753	695.026	664.389	675.335	522.261	483.874	584.396	639.893	528.647	673.787	495.646	433.118	608.95	611.365	487.881
RP403	PA(16:0/20:3(8Z,11Z,14Z))	HMDB0115511	C39H71O8P	735.861	735.861	716.521	0.529916	4.89101	2.07639	0	0.216684	2.72069	1.33651	3.61001	36.1936	0.43977	42.328	1.01745	8.93242	44.3646	10.2297	50.0705	181.983	308.474	598.623	477.808	473.032	446.986	509.56	456.975	433.413	369.143	353.142	355.251	321.995	73.5824	359.826	425.47
TN80	PA(8:0/16:0)	HMDB0115487	C27H53O8P	1233.44	1233.44	559.337	133.563	93.8138	149.839	146.817	142.227	144.694	141.912	146.163	151.065	137.306	110.799	118.101	31.082	94.3441	56.9258	56.3416	5.28252	4.11815	8.09739	8.61716	8.16802	7.19669	7.99734	4.09544	5.08773	4.79234	5.06331	3.64733	3.02013	3.31427	2.52663	2.37722
RP154	PA(8:0/14:0)	HMDB0115485	C25H49O8P	331.671	331.671	491.316	347.572	363.259	298.146	302.353	300.954	337.555	310.097	335.4	308.283	341.002	307.532	355.286	323.187	327.488	330.684	314.047	380.301	402.701	367.82	378.55	377.83	376.535	407.217	427.048	378.199	339.768	378.287	387.362	364.118	372.75	387.313	396.62
RP771	PA(8:0/13:0)	HMDB0115484	C24H47O8P	602.998	602.998	533.267	610.215	589.044	667.844	637.887	666.76	681.113	659.287	649.458	595.917	751.309	642.402	589.292	628.757	641.655	532.243	631.297	542.867	502.88	609.032	660.43	658.003	576.701	534.313	636.137	584.657	400.422	606.867	279.494	446.138	530.242	472.422	505.486
TN22	PA(8:0/12:0)	HMDB0115483	C23H45O8P	1228.74	1228.74	463.282	23.7816	13.7996	26.4614	22.0324	24.9693	24.7825	32.4657	25.2185	30.0885	28.1158	22.3718	25.2512	8.61207	16.8655	18.8924	21.2107	4.39317	5.20056	5.22275	7.31561	4.92228	4.82104	5.5079	5.21482	5.66779	4.6714	4.80017	3.67923	4.50486	4.98156	4.35268	5.89085
TN841	PA(8:0/10:0)	HMDB0115482	C21H41O8P	877.029	877.029	435.252	168.418	128.17	165.247	158.658	170.919	142.761	159.037	160.798	159.133	131.212	123.743	119.129	54.8092	115.194	75.7629	106.082	97.3637	102.936	105.867	126.936	115.23	109.76	115.868	114.232	129.61	111.962	138.848	86.5859	99.7617	91.223	89.168	92.4736
RP20	PA(22:6(4Z,7Z,10Z,13Z,16Z,19Z)/22:2(13Z,16Z))	HMDB0115421	C47H77O8P	845.625	845.625	818.569	0.295504	1.76369	1.12042	2.29735	0	1.30761	2.09382	0.752381	3.8774	5.11448	3.69242	1.13793	2.4537	0	3.39757	6.27456	77.7188	68.1781	57.2672	65.2753	82.3109	49.8947	60.6169	55.2343	84.2735	68.4747	72.2657	53.2949	64.3788	94.1986	66.5616	68.9777
RP1009	PA(22:6(4Z,7Z,10Z,13Z,16Z,19Z)/18:1(9Z))	HMDB0115408	C43H71O8P	854.438	854.438	769.478	30.8737	9.32017	47.8716	41.6222	41.7014	65.396	60.7971	40.4685	56.4793	28.5491	22.7453	27.349	48.7767	20.4856	29.8319	41.1719	28.126	78.1398	82.262	86.5119	76.034	26.3567	53.3034	37.9565	34.4695	50.6855	46.3435	53.2008	60.8363	86.6877	172.163	201.532
RP1630	PA(22:5(7Z,10Z,13Z,16Z,19Z)/20:5(5Z,8Z,11Z,14Z,17Z))	HMDB0115391	C45H69O8P	835.551	835.551	786.506	10.6301	22.7262	49.1129	27.127	29.9154	25.1055	22.8685	13.0623	20.3774	27.5504	23.2576	42.1715	48.1701	71.1704	51.2991	355.386	239.126	221.942	258.014	238.756	244.346	209.457	211.009	212.967	170.317	185.571	261.919	286.278	358.277	394.347	375.203	365.072
RP750	PA(22:4(7Z,10Z,13Z,16Z)/22:4(7Z,10Z,13Z,16Z))	HMDB0115343	C47H77O8P	868.413	868.413	801.545	1.42874	3.17322	1.24487	3.19348	1.82819	1.11147	2.65735	2.25394	0.339103	1.3602	1.49615	2.89994	1.1903	2.80151	2.20621	2.97522	19.9554	34.698	39.7848	63.7347	81.8733	104.655	91.8794	90.8507	175.126	144.95	168.335	206.283	164.984	169.533	155.21	161.476
RP194	PA(20:5(5Z,8Z,11Z,14Z,17Z)/14:1(9Z))	HMDB0115199	C37H61O8P	333.55	333.55	647.409	579.969	581.596	587.049	581.074	577.459	580	582.492	592.809	606.031	621.673	587.081	602.795	589.12	590.918	593.467	606.136	634.486	616.449	625.801	639.171	653.382	637.663	647.398	641.954	629.554	648.255	617.134	623.191	637.687	620.041	656.042	638.56
RP389	PA(20:4(5Z,8Z,11Z,14Z)/20:0)	HMDB0115156	C43H77O8P	734.306	734.306	770.569	0.206396	0.230296	0	0	0.746992	0.397876	0	0	0	0	0	0	0	0	0.513411	0.578133	268.854	262.237	209.012	367.196	221.682	199.522	209.332	266.65	267.403	203.094	231.014	185.366	164.649	157.615	208.148	251.263
RP959	PA(20:3(5Z,8Z,11Z)/22:5(4Z,7Z,10Z,13Z,16Z))	HMDB0115140	C45H73O8P	844.383	844.383	790.538	2.96088	0.724997	2.52881	2.04524	3.54854	18.7267	15.811	23.4835	40.0455	49.251	43.4189	46.7574	47.5273	42.7454	32.7713	35.4387	565.584	463.38	634.915	629.772	585.121	649.317	673.655	733.886	690.779	607.611	735.089	757.196	461.447	452.624	631.015	772.167
TN596	PA(20:3(5Z,8Z,11Z)/14:1(9Z))	HMDB0115119	C37H65O8P	376.717	376.717	707.403	67.9907	77.789	65.9363	72.9452	64.6059	68.0221	62.2821	65.3734	73.1626	66.7687	78.0154	63.7285	46.5427	66.3714	68.5776	68.0156	58.9761	65.1975	61.8946	62.094	63.1874	66.798	66.1842	58.7241	60.597	65.52	61.5003	61.5821	60.0698	66.8485	65.9924	58.8626
RP290	PA(20:1(11Z)/15:0)	HMDB0115093	C38H73O8P	776.688	776.688	727.465	56.2126	75.2985	64.4541	82.2332	61.4162	69.5917	74.2147	71.9709	75.0941	90.9117	66.1249	76.406	79.4473	76.489	68.172	90.7467	56.4814	58.2161	58.3164	66.6498	62.0688	48.2791	35.3134	51.8886	47.1275	59.0051	42.9274	47.8234	31.7588	30.5698	43.8267	52.2786
RP166	PA(18:4(6Z,9Z,12Z,15Z)/18:4(6Z,9Z,12Z,15Z))	HMDB0115038	C39H61O8P	856.306	856.306	671.408	4.5158	5.06761	4.97293	2.91993	2.84779	5.08824	4.32394	3.92595	6.87724	5.57545	6.6596	9.81404	8.70481	6.66639	6.13534	19.4359	258.39	210.976	173.369	173.903	175.862	168.694	173.286	188.532	176.962	137.565	148.825	121.289	123.598	118.071	135.72	128.43
TN762	PA(18:4(6Z,9Z,12Z,15Z)/14:1(9Z))	HMDB0115028	C35H59O8P	399.621	399.621	661.389	12.5922	11.4626	10.2115	11.427	10.8314	10.2474	10.5524	11.8405	12.4551	9.5625	11.2052	10.0814	10.316	11.0992	10.2602	8.34067	8.81341	10.1457	8.51338	9.66615	8.10012	8.12976	10.4475	9.62283	8.52269	10.1839	10.0544	10.5907	9.96681	8.15437	7.6819	10.926
TN158	PA(18:3(9Z,12Z,15Z)/18:3(9Z,12Z,15Z))	HMDB0115010	C39H65O8P	357.077	357.077	657.42	103.756	103.897	101.624	98.8071	96.4499	89.9948	98.1497	96.7402	100.364	97.8063	101.186	97.6819	86.3577	98.6044	97.7015	97.6049	86.1226	94.3277	84.5048	85.4668	87.1697	87.9316	82.3866	76.3182	88.4404	88.8014	83.7246	86.1232	89.3019	91.4167	87.2252	78.3579
RP1910	PA(18:3(6Z,9Z,12Z)/20:3(5Z,8Z,11Z))	HMDB0114987	C41H69O8P	841.672	841.672	738.506	2.17827	2.78993	11.8082	7.52007	7.63423	12.5609	96.4571	47.5719	102.585	132.64	119.936	149.851	197.623	216.823	165.72	96.0189	217.2	185.846	187.083	194.032	157.448	118.335	78.6506	74.1823	130.724	76.9467	65.9562	77.4608	88.2932	108.834	78.6547	105.269
TN966	PA(18:3(6Z,9Z,12Z)/18:1(11Z))	HMDB0114979	C39H69O8P	455.388	455.388	679.473	9.76484	20.8098	10.533	12.0045	10.6439	11.6197	12.4173	11.4235	11.5826	8.32455	8.13002	9.60922	10.7918	10.5165	10.3642	11.9489	8.05426	10.2147	11.4936	11.0438	14.8497	10.517	11.3243	8.66579	3.12043	10.1947	8.37774	7.42773	9.17732	10.363	9.71311	7.50615
RP890	PA(18:2(9Z,12Z)/20:4(5Z,8Z,11Z,14Z))	HMDB0114961	C41H69O8P	338.856	338.856	721.481	142.388	144.631	132.764	136.779	131.126	141.715	143.466	142.404	144.182	148.857	147.079	145.324	148.761	144.811	147.866	142.203	147.712	151.728	155.515	147.865	159.348	158.149	162.942	158.809	140.808	144.819	153.667	150.532	146.32	143.838	145.741	147.298
RP54	PA(18:1(11Z)/16:1(9Z))	HMDB0114900	C37H69O8P	780.631	780.631	673.485	18.3029	49.1071	45.8811	72.7952	78.5087	78.4457	62.1842	50.7244	53.7515	71.7562	61.5865	85.5746	90.0682	92.9205	74.3271	62.5494	12.3807	17.8207	15.2091	13.7578	12.7054	10.3262	2.78757	12.0246	3.14655	11.3837	6.16259	5.22151	5.83091	1.2447	7.61492	2.95053
TN113	PA(16:1(9Z)/22:4(7Z,10Z,13Z,16Z))	HMDB0114867	C41H71O8P	420.272	420.272	723.502	321.723	321.358	272.115	268.136	267.997	275.511	279.804	281.7	266.283	276.398	269.686	277.271	267.498	270.382	271.359	259.66	250.736	254.79	259.175	255.216	257.898	251.068	243.717	242.42	240.055	246.154	253.893	245.399	235.819	239.001	247.433	238.593
RP2017	PA(16:0/22:5(7Z,10Z,13Z,16Z,19Z))	HMDB0114848	C41H71O8P	356.326	356.326	705.486	157.849	133.756	138.533	131.047	128.22	131.721	134.623	142.275	128.547	133.197	123.492	136.306	134.658	138.888	132.069	134.66	141.103	140.856	145.679	134.552	130.411	139.74	145.822	130.548	141.029	137.492	138.883	123.727	118.377	127.374	139.125	139.443
TN280	PA(16:0/14:1(9Z))	HMDB0114834	C33H63O8P	413.518	413.518	601.423	33.621	39.3824	33.3071	30.9202	33.6168	34.6662	32.6842	30.2362	32.3658	33.5166	33.1896	30.3588	33.0298	28.1124	30.1762	26.2464	25.2761	27.6467	24.7809	27.2339	25.5102	27.9015	28.1727	25.3213	28.483	27.2513	28.8672	24.9979	26.8111	29.0314	28.9009	27.8454
TN505	PA(15:0/20:4(8Z,11Z,14Z,17Z))	HMDB0114822	C38H67O8P	969.319	969.319	647.438	1.37873	1.80706	1.47299	1.55566	2.09946	1.26701	1.08978	0.878437	0.733273	1.08442	0.564807	0.751695	0.868969	0.520256	0.583921	1.01191	179.818	185.035	1.34197	4.20022	7.42353	3.83875	1.06497	2.32882	165.884	212.67	162.493	183.658	110.734	170.2	145.299	26.0521
RP95	PA(14:1(9Z)/14:0)	HMDB0114795	C31H59O8P	781.203	781.203	613.385	70.7768	127.547	148.543	116.766	148.893	115.415	137.769	125.201	156.313	128.201	207.429	183.142	162.129	169.374	182.897	162.554	79.9581	85.1383	69.1963	86.9905	63.2298	73.5115	65.9889	59.9156	50.583	59.4026	45.9892	30.3547	28.9769	34.3587	23.9745	40.1616
TN698	PA(14:0/22:1(13Z))	HMDB0114789	C39H75O8P	420.597	420.597	741.492	74.5944	77.0837	61.9258	62.7574	64.5366	59.0635	62.1984	67.126	60.1786	61.2944	60.6753	56.5681	56.1351	57.4108	51.6993	57.8029	55.5855	55.6323	56.4067	57.9417	59.4639	57.1439	60.1665	54.5181	56.7937	55.6782	59.1729	57.4194	49.2064	54.5564	54.0121	52.1878
RP1593	PA(10:0/8:0)	HMDB0114778	C21H41O8P	667.361	667.361	470.287	234.013	111.307	216.152	152.984	182.975	213.253	193.239	207.933	150.965	167.089	131.974	155.764	172.061	141.854	129.967	156.094	150.92	182.385	217.02	172.6	182.627	132.421	169.17	131.224	135.356	115.614	162.637	92.7609	142.372	135.911	137.766	108.844
TN2470	PA(10:0/19:0)	HMDB0114775	C32H63O8P	367.772	367.772	629.419	47.9516	49.0999	45.71	38.2938	38.4978	38.3163	46.184	47.113	37.0251	34.4687	36.2355	33.5732	37.5959	31.7977	39.3936	30.4266	30.2475	41.4888	31.1778	29.9208	44.3434	28.3413	30.0628	31.7661	46.4564	31.6282	33.7381	40.6497	43.8302	46.483	29.6834	29.4431
TN1973	LysoPA(i-24:0/0:0)	HMDB0114770	C27H55O7P	805.988	805.988	561.325	128.763	78.0073	123.262	113.507	106.958	91.4364	103.078	88.6012	59.0466	112.793	114.737	89.2992	47.1589	108.129	77.4651	89.1605	67.0015	99.4556	71.541	102.728	85.1467	95.2252	91.7149	68.6649	90.4976	101.112	104.669	76.5505	81.6466	85.5946	127.667	85.5353
RP1400	LysoPA(i-14:0/0:0)	HMDB0114765	C17H35O7P	579.35	579.35	400.241	41.2148	38.5136	88.8604	54.1981	73.4718	46.3921	52.7591	62.178	50.1512	71.5596	71.1171	66.0777	46.8429	31.7288	81.1031	99.071	64.1636	61.9019	91.6218	96.132	134.35	103.403	75.7275	58.7845	104.816	112.429	85.7028	87.6601	57.0726	67.2151	98.2696	93.6974
RP387	LysoPA(a-13:0/0:0)	HMDB0114760	C16H33O7P	650.187	650.187	386.228	12.6974	181.809	101.146	134.758	128.371	157.766	150.927	116.183	142.999	76.3485	122.604	69.3363	143.974	45.7844	126.96	66.709	13.2791	14.4186	18.3677	15.9023	15.3609	10.6908	12.0309	19.3722	18.9075	15.7382	15.0046	16.2253	14.4782	19.1935	15.1837	16.6125
RP1350	LysoPA(20:2(11Z,14Z)/0:0)	HMDB0114758	C23H43O7P	696.981	696.981	480.308	31829.7	18375	35538.4	25963	27638.1	31799.2	29325	29868	19650.7	18470.3	13759.5	17608.9	19883.6	16895	15650.5	18617.9	21721.9	25618.1	25768.5	32091.9	29659.1	17814.1	23142.4	26985.3	14288.9	16163.3	16973	10991.3	15155.7	12937.6	14936.8	11678.3
TN320	LysoPA(24:1(15Z)/0:0)	HMDB0114757	C27H53O7P	876.222	876.222	543.341	228.386	188.896	247.194	242.319	233.494	231.497	235.892	255.199	246.919	212.424	189.436	188.402	96.0946	189.967	155.392	184.873	140.164	153.118	168.229	173.516	151.446	140.035	172.729	163.078	169.491	159.383	174.841	121.176	148.604	148.547	162.063	155.235
RP1424	LysoPA(24:0/0:0)	HMDB0114756	C27H55O7P	628.636	628.636	561.333	287.738	288.692	372.935	410.199	368.983	310.405	321.756	301.025	250.135	346.025	262.007	261.269	257.143	279.661	263.86	242.219	311.645	257.463	293.37	352.702	407.24	304.74	275.318	327.938	266.303	245.922	255.733	223.694	265.119	277.634	280.698	270.198
RP1878	LysoPA(22:5(4Z,7Z,10Z,13Z,16Z)/0:0)	HMDB0114753	C25H41O7P	604.649	604.649	502.292	27501.6	24494.1	32901.3	32640.1	31923.9	30885.4	28534	30076.8	24191.2	34040.1	26817.8	23754.2	24526.8	27077.6	22555.2	27079.2	25964.4	24698.9	27921.2	36510.7	39431.7	29939.9	28665.4	31954.3	25652.2	22471.8	27985.6	17421.7	24824.6	26866.9	25251.9	24972.5
RP2366	LysoPA(22:2(13Z,16Z)/0:0)	HMDB0114751	C25H47O7P	667.384	667.384	508.339	1203.72	610.076	1283.04	1139.79	1117.28	1068.38	972.606	1090.98	545.079	562.787	415.735	500.755	572.57	418.435	452.269	510.937	1076.59	1055.75	1221.89	1767.03	1568.4	1114.63	1211.04	1286.19	498.009	569.156	674.893	350.859	434.339	417.082	422.569	405.469
RP1604	LysoPA(22:1(13Z)/0:0)	HMDB0114750	C25H49O7P	860.207	860.207	510.353	966.893	392.759	2198.54	749.005	1860.06	1760.75	2034.84	2142.08	1087.07	993.696	736.383	1009.33	1056.67	1010.3	909.825	1146.18	2667.25	2090.82	3589.1	3295.76	3007.09	2810.16	2718.66	2405.02	2110.36	1908.67	2418.45	1323.49	1495.66	1986.09	2085.4	1625.63
TN204	LysoPA(22:0/0:0)	HMDB0114749	C25H51O7P	383.619	383.619	517.325	216.217	220.897	203.427	208.228	205.146	202.101	207.482	210.444	215.401	203.798	214.253	207.466	190.667	194.739	194.13	191.134	177.055	186.047	182.089	181.79	190.371	186.484	185.13	185.67	191.869	187.595	192.053	190.611	194.302	192.572	190.267	177.475
RP2503	LysoPA(20:3(5Z,8Z,11Z)/0:0)	HMDB0114747	C23H41O7P	602.161	602.161	478.292	15152.1	9156	16041.4	16342	13159.5	13524.6	16178.3	15574.6	11487.4	12501.6	11661.4	14210.5	12075.5	12611.6	10195.3	13245.8	16389.1	12981.7	14877.6	17532.8	16340.9	12848	16620.7	13342.5	11946.2	11469.2	14346.5	7259.67	11543.9	10892.8	12489.3	8881.58
TN2041	LysoPA(18:4(6Z,9Z,12Z,15Z)/0:0)	HMDB0114745	C21H35O7P	677.628	677.628	453.199	37.049	14.339	24.6515	21.0232	35.9092	45.576	31.7048	41.8198	64.4594	15.6605	43.5679	29.755	8.48175	51.0266	148.781	103.299	35.3677	18.4385	10.3699	20.0591	30.2028	19.8653	33.4212	16.1084	60.825	69.5015	24.0187	76.0063	82.1269	22.9912	80.0975	390.067
TN1014	LysoPA(18:3(9Z,12Z,15Z)/0:0)	HMDB0114744	C21H37O7P	286.226	286.226	415.226	126.01	117.469	105.014	117.191	123.172	107.437	100.001	95.2326	123.025	90.7147	107.882	84.0081	24.8829	96.0162	121.724	95.182	97.362	89.6044	110.464	95.7367	86.4352	95.5166	73.4202	74.2876	83.0643	133.073	76.6388	116.274	131.546	75.9627	71.1266	67.0846
RP1474	PE-NMe2(24:1(15Z)/24:1(15Z))	HMDB0114659	C55H106NO8P	65.9943	65.9943	922.764	15.6769	13.2148	8.37974	11.7363	15.2089	15.0909	15.9675	14.5003	14.3298	8.75842	16.6419	17.1841	14.8897	7.58531	10.293	11.2996	18.4578	19.2438	12.4115	14.9751	20.7336	7.10483	16.8831	16.2971	23.0675	19.6346	23.078	14.1158	21.0005	17.0194	14.7262	14.5304
RP1674	PE-NMe2(24:0/24:1(15Z))	HMDB0114630	C55H108NO8P	66.043	66.043	980.742	15.3181	8.67251	9.9212	15.2964	14.3416	16.6406	13.7606	11.8599	14.5393	9.44084	6.84905	15.0515	9.56824	6.89538	13.5005	15.3853	13.9959	17.0088	19.5638	13.869	18.4693	7.18194	18.3019	11.4109	18.8034	18.1339	24.2387	21.2029	19.3204	13.7242	16.2619	15.5057
RP500	PE-NMe2(22:6(4Z,7Z,10Z,13Z,16Z,19Z)/20:5(5Z,8Z,11Z,14Z,17Z))	HMDB0114594	C49H76NO8P	780.948	780.948	820.53	1.79677	2.64082	8.78655	1.59481	0.861699	4.61327	2.10889	4.1394	4.43934	5.81723	7.9243	5.97067	12.4457	8.2989	13.3194	10.5937	65.721	122.245	340.067	502.81	446.484	524.99	409.393	400.149	294.629	250.309	245.602	281.797	231.597	250.661	257.858	216.544
RP2181	PE-NMe2(22:5(4Z,7Z,10Z,13Z,16Z)/14:1(9Z))	HMDB0114524	C43H74NO8P	843.505	843.505	764.523	1.58582	9.69215	6.28835	16.9505	22.4726	25.4692	38.7768	44.2469	49.0916	130.108	66.1537	212.264	179.469	273.806	235.262	2107.75	2129.51	1947.47	2021.86	1938.19	2151.55	1668.48	1870.47	1526.96	1345.51	1384.1	1159.87	988.309	1024.34	1397.42	1143.01	295.968
TN554	PE-NMe2(22:4(7Z,10Z,13Z,16Z)/20:5(5Z,8Z,11Z,14Z,17Z))	HMDB0114514	C49H80NO8P	419.607	419.607	824.569	33.5721	27.0473	34.7998	30.2333	32.0181	35.048	32.0197	32.3049	32.974	33.6841	36.2428	30.1684	34.0252	28.6158	32.9508	32.4303	33.6759	31.5655	30.2291	28.2245	30.6305	30.6018	27.6135	28.2218	25.4119	27.9531	30.5895	25.6764	26.8093	29.6311	25.6024	29.277
RP2773	PE-NMe2(22:4(7Z,10Z,13Z,16Z)/14:1(9Z))	HMDB0114496	C43H76NO8P	840.474	840.474	788.521	3.20597	9.3718	13.8622	10.0299	9.60501	97.1897	126.875	129.475	285.325	309.864	315.345	356.718	253.926	237.261	121.033	167.049	169.569	176.509	193.061	184.906	172.426	122.042	109.354	180.745	151.253	162.466	198.755	160.679	174.7	190.1	182.69	156.158
RP1513	PE-NMe2(20:4(8Z,11Z,14Z,17Z)/18:3(9Z,12Z,15Z))	HMDB0114362	C45H76NO8P	742.166	742.166	790.539	3.68086	0	5.93104	2.47311	4.95612	2.29478	50.3165	7.16594	70.3645	60.3411	74.6734	60.0222	75.2262	145.13	131.157	64.8559	830.579	838.651	910.489	858.938	693.514	736.827	763.697	93.1149	80.7661	606.342	727.617	727.323	610.65	489.993	562.091	720.493
RP409	PE-NMe2(20:3(8Z,11Z,14Z)/20:4(8Z,11Z,14Z,17Z))	HMDB0114314	C47H80NO8P	847.552	847.552	835.596	0.869997	0.762706	0.543188	0.741303	0.248749	3.61929	2.0557	0	0.425575	1.22313	1.79797	1.0022	2.85976	0	0.709225	1.14057	105.475	119.533	80.8283	96.1049	52.0904	48.4824	90.9741	123.3	108.694	96.5498	84.832	70.0264	68.8232	83.4554	80.8951	68.7767
RP320	PE-NMe2(20:3(8Z,11Z,14Z)/14:1(9Z))	HMDB0114297	C41H74NO8P	737.44	737.44	740.523	1.66297	1.25558	0.915263	2.14965	1.22521	3.06345	0.238258	4.27801	11.6258	22.5309	33.3396	29.5005	37.7671	167.328	172.043	250.346	893.727	1024.32	1012.03	931.289	1032.57	885.332	758.78	739.649	730.745	826.381	740.147	771.207	596.234	569.774	669.907	781.279
RP179	PE-NMe2(20:0/14:0)	HMDB0114181	C41H82NO8P	849.428	849.428	770.568	5.07912	0.776684	2.78934	0.510293	1.32742	22.0854	1.22741	3.90451	3.39071	1.24193	2.28345	4.57092	0.840128	5.24194	4.47135	6.40686	123.667	131.475	141.835	154.169	127.127	100.48	121.471	135.707	123.22	121.612	129.141	110.597	95.0734	95.9066	123.77	128.207
RP1826	PE-NMe2(18:4(6Z,9Z,12Z,15Z)/20:4(8Z,11Z,14Z,17Z))	HMDB0114170	C45H74NO8P	737.349	737.349	788.524	2.87333	4.73131	7.43526	6.61243	10.1661	31.339	281.89	88.4016	360.309	330.733	321.098	353.392	497.896	666.941	631.466	106.42	374.356	410.086	353.708	305.766	357.933	335.28	94.3004	136.133	262.388	274.224	270.289	264.905	226.124	221.388	231.149	243.814
TN1235	PE-NMe2(18:4(6Z,9Z,12Z,15Z)/14:1(9Z))	HMDB0114153	C39H68NO8P	423.838	423.838	732.453	12.1275	14.544	12.5859	11.2171	11.9765	13.1977	13.2867	12.0855	14.3176	10.1505	9.86338	10.5633	12.8688	11.6613	10.917	11.5489	11.3527	12.8278	11.4551	12.1044	12.0368	10.4214	9.96283	10.915	12.7639	12.5436	13.0443	10.0535	12.6425	10.942	11.811	11.0856
RP1552	PE-NMe2(18:0/22:5(7Z,10Z,13Z,16Z,19Z))	HMDB0114007	C47H84NO8P	333.55	333.55	860.557	45.1012	50.8104	45.0261	41.5451	42.2614	49.0488	53.2762	45.7412	45.6195	47.5148	47.9068	52.1477	46.7143	58.7448	44.8586	52.7692	59.6109	43.7406	56.9571	49.9133	55.9396	52.9541	61.2189	62.2568	43.9764	52.9545	55.555	59.1383	45.849	54.5067	55.0991	47.8809
RP658	PE-NMe2(16:1(9Z)/22:2(13Z,16Z))	HMDB0113978	C45H84NO8P	735.582	735.582	820.583	2.85859	0.741874	0	3.14129	3.53811	3.79905	4.40628	2.95889	8.2294	6.65366	2.53963	12.3054	15.6597	15.1141	67.2689	12.5745	62.4972	72.9814	55.5669	47.4662	65.6247	56.0212	83.1156	169.245	142.058	173.845	215.851	234.465	230.396	246.104	218.192	253.326
RP489	PE-NMe2(16:0/22:6(4Z,7Z,10Z,13Z,16Z,19Z))	HMDB0113959	C45H78NO8P	848.619	848.619	809.583	0	3.09565	0	0	3.9378	2.17207	2.09889	0.384594	0.903908	0.745483	1.10461	0.189336	2.29604	7.22035	5.12573	1.85459	795.025	682.793	519.729	784.015	1405.16	1787.8	2184.69	2244.85	1949.21	1532.45	1449.49	1292.3	1440.96	1514.89	1609.15	1778.8
RP1500	PE-NMe2(15:0/22:5(4Z,7Z,10Z,13Z,16Z))	HMDB0113935	C44H78NO8P	781.029	781.029	802.536	1.22785	1.68241	3.40818	0	0.417388	0.907919	2.08561	0.438614	0.396498	11.6841	11.9203	9.94782	20.0541	16.4758	24.2603	39.1967	359.652	381.984	415.691	561.085	407.214	460.322	348.894	400.577	498.62	434.879	352.352	277.018	200	198.447	178.679	181.557
RP160	PE-NMe2(14:1(9Z)/22:2(13Z,16Z))	HMDB0113911	C43H80NO8P	735.786	735.786	792.552	48.4851	48.6267	36.0562	74.68	43.3852	43.0528	29.1749	32.286	42.1897	28.7904	21.8626	21.0655	29.511	23.0782	31.0541	31.4186	333.508	256.852	318.705	331.909	173.866	377.167	545.257	691.531	877.156	747.751	772.642	675.182	650.853	585.867	522.939	446.754
RP295	PE-NMe2(16:1(9Z)/18:1(11Z))	HMDB0113858	C41H78NO8P	848.869	848.869	744.554	0.727164	1.27518	3.69151	1.51344	4.69909	7.17056	3.03422	6.65745	4.60458	2.26017	3.68016	2.98758	4.26736	4.20607	3.40668	2.62497	211.312	137.58	126.948	241.742	225.914	188.26	169.254	193.861	207.524	122.057	123.658	121.689	119.041	78.4484	130.496	131.592
RP127	PE-NMe2(16:1(9Z)/18:1(9Z))	HMDB0113857	C41H78NO8P	736.117	736.117	766.536	6.2565	6.82923	3.50708	5.81608	6.27105	7.79544	6.42492	12.141	10.6157	15.3259	18.9176	32.088	38.9199	55.5953	58.6829	70.3539	940.719	1026.34	1098.61	1006.87	1152.34	943.975	1028.5	889.236	892.617	802.007	888.693	757.567	856.78	847.435	911.819	756.504
TN129	PE-NMe2(14:1(9Z)/18:0)	HMDB0113853	C39H76NO8P	388.232	388.232	756.491	25.0362	27.0053	24.1268	24.2024	26.3942	26.3619	24.1361	21.9582	20.8661	24.2317	22.168	17.7587	19.4309	20.6221	23.2401	22.5968	23.9983	19.2042	20.0377	18.5431	17.4332	17.852	17.6438	16.3042	17.6598	18.64	16.9732	21.3676	15.328	16.351	18.8975	18.8686
RP91	PE-NMe2(16:1(9Z)/16:1(9Z))	HMDB0113849	C39H74NO8P	846.011	846.011	716.523	1.25818	1.56063	0.35658	0	0.123183	0	0.464294	0	0.485629	6.21276	3.38055	6.95898	5.99965	7.95174	4.09389	2.94996	176.637	286.655	394.957	376.788	353.675	352.18	358.276	321.721	299.088	293.573	258.029	252.513	254.479	308.239	317.145	300.565
RP2602	PE-NMe(22:5(7Z,10Z,13Z,16Z,19Z)/22:5(4Z,7Z,10Z,13Z,16Z))	HMDB0113669	C50H80NO8P	735.17	735.17	854.57	2.61492	3.59838	0	3.00428	0.785321	2.22102	3.20468	4.712	10.2919	8.06659	5.30795	8.87726	7.82624	18.0964	397.849	726.778	852.821	998.034	1025.67	940.099	662.356	882.296	715.712	884.788	952.987	642.921	282.005	262.945	553.436	527.712	581.871	708.269
RP2368	PE-NMe(22:5(4Z,7Z,10Z,13Z,16Z)/22:5(7Z,10Z,13Z,16Z,19Z))	HMDB0113642	C50H80NO8P	781.187	781.187	876.553	1.33358	0.418256	5.19705	0	2.60537	2.30682	6.04052	0.41631	0.858555	2.68354	2.39318	1.73087	4.08859	3.19946	110.276	453.21	101.077	130.214	116.218	146.398	129.448	133.603	110.511	110.697	91.62	22.8465	16.5154	23.2169	46.3818	46.2846	71.7215	53.0062
RP1156	PE-NMe(22:5(4Z,7Z,10Z,13Z,16Z)/20:3(5Z,8Z,11Z))	HMDB0113634	C48H80NO8P	846.218	846.218	830.57	0.11122	1.76073	0.309437	1.99807	1.97784	1.94941	2.28425	0.941089	5.34491	4.3065	0.971084	7.93956	14.205	11.3751	5.68504	25.0741	1613.95	1510.19	1631.22	1847.78	1997.33	1995.09	2259.91	2411.83	2367.04	1959.59	2127.55	1694.91	1403.58	565.563	491.238	1165.48
RP539	PE-NMe(22:4(7Z,10Z,13Z,16Z)/16:0)	HMDB0113595	C44H80NO8P	847.948	847.948	782.57	0.475409	2.90309	0.645406	0.867592	1.46412	0	0.745219	0	0.643258	0.620184	1.90307	0.104357	0	2.25884	0.731401	0	1763.28	4524.1	13552.9	19067	20591.7	18747.4	18586.8	16024.6	11923.1	10941.1	13560.6	13020.7	13525.4	14042.5	13941.4	13291.4
TN1143	PE-NMe(20:5(5Z,8Z,11Z,14Z,17Z)/18:4(6Z,9Z,12Z,15Z))	HMDB0113490	C44H70NO8P	386.235	386.235	772.49	19.5494	22.1507	15.2713	15.0376	17.7624	15.8907	16.0534	12.8314	13.7688	13.6017	16.841	13.1968	14.6155	13.9501	12.4315	14.0505	12.2765	14.4797	14.1058	14.4314	14.3538	13.7023	15.9172	13.7702	15.3834	13.8852	13.9777	14.5898	14.2293	13.3127	12.7548	14.2099
RP735	PE-NMe(20:4(8Z,11Z,14Z,17Z)/22:5(4Z,7Z,10Z,13Z,16Z))	HMDB0113474	C48H78NO8P	330.748	330.748	845.584	421.21	435.229	429.253	416.261	420.597	431.862	419.992	446.288	443.53	460.911	435.386	430.061	437.553	438.143	448.495	438.997	466.235	450.234	455.262	447.833	463.887	462.764	473.46	477.62	447.758	442.359	447.96	457.515	437.416	444.6	455.339	459.319
RP210	PE-NMe(20:3(8Z,11Z,14Z)/20:3(5Z,8Z,11Z))	HMDB0113409	C46H80NO8P	847.798	847.798	806.57	0.51807	0.652746	0	0	0.687735	0	0	0	0.263489	2.07132	0	1.47715	1.40066	13.3669	21.7997	87.1851	22944.8	18948.5	13753.6	14289.7	16903	16585.8	17774.8	18620.5	17974.1	14814.3	15343	14126	13601.6	13536.8	13576	14230.4
RP238	PE-NMe(20:1(11Z)/20:5(5Z,8Z,11Z,14Z,17Z))	HMDB0113327	C46H80NO8P	835.992	835.992	844.529	5.53646	3.66296	12.7422	13.0249	11.1836	9.38204	17.6189	14.3738	19.3765	12.7522	22.8942	16.0399	4.1587	14.6613	21.1431	12.9949	315.365	254.466	208.682	199.9	188.942	201.886	209.359	234.841	208.103	174.134	162.989	136.623	171.607	142.973	141.257	129.713
TN611	PE-NMe(18:4(6Z,9Z,12Z,15Z)/14:0)	HMDB0113250	C38H68NO8P	420.887	420.887	680.462	19.6197	18.293	14.8895	13.3429	18.6446	15.9777	16.0942	16.6588	14.6145	14.6994	16.0535	14.6349	14.5563	16.6007	17.2196	16.091	14.5156	14.9128	13.3272	11.7814	13.4013	12.984	12.3339	15.827	13.4654	15.954	15.1715	12.4334	12.58	11.2848	14.8874	15.3162
RP39	PE-NMe(18:3(9Z,12Z,15Z)/16:1(9Z))	HMDB0113225	C40H72NO8P	847.673	847.673	743.535	11.0081	1.13849	14.8395	10.0823	8.45316	10.7697	17.2251	10.5093	17.4462	8.89744	5.45039	7.97225	14.1807	7.74568	8.21385	13.5141	102.851	67.9705	91.0216	111.255	119.82	100.324	90.0617	90.3983	121.747	90.8782	83.7954	62.4706	95.593	93.6946	83.8687	74.6553
RP96	PE-NMe(18:2(9Z,12Z)/18:1(11Z))	HMDB0113170	C42H78NO8P	848.554	848.554	756.555	0	0	0.432175	1.25766	1.06799	0	1.10467	1.28735	1.03217	0.482312	0	0.282861	0	0.975128	1.01291	3.33517	2382.9	1797.53	1979.8	2147.35	1923.31	1678.33	1516.92	1547.25	1902.38	2030.74	2264.46	1867.65	1964.2	2040.4	2112.49	1842.69
RP558	PE-NMe(18:1(9Z)/22:6(4Z,7Z,10Z,13Z,16Z,19Z))	HMDB0113161	C46H78NO8P	780.711	780.711	804.553	2.71979	1.74349	1.84306	3.62591	1.56914	1.81242	0.839895	0.78046	2.62849	3.44524	1.36896	0	9.78078	48.4104	96.3123	254.961	888.517	1486.72	4278.09	6780.45	5864.38	6762.59	5601.87	4588.68	3725.49	3008.87	2810.05	3206.89	2330.64	2516.55	2860.62	2947.01
RP2550	PE-NMe(18:1(11Z)/22:6(4Z,7Z,10Z,13Z,16Z,19Z))	HMDB0113134	C46H78NO8P	781.297	781.297	826.537	1.33562	0	7.83733	3.30925	7.49122	0.489704	6.45627	5.61002	4.9934	5.02215	4.93407	7.71706	17.1273	60.4857	131.234	241.433	163.379	181.469	259.372	279.317	178.966	239.543	223.343	190.458	175.644	113.187	92.1491	78.5477	50.647	81.1899	93.7718	100.084
RP446	PE-NMe(18:0/22:5(4Z,7Z,10Z,13Z,16Z))	HMDB0113105	C46H82NO8P	780.876	780.876	830.567	0	4.37593	1.74957	0.396616	0	0	0	0.91614	0	2.5083	2.49811	0.418261	7.35961	4.63577	2.83022	10.9467	2050.29	2093.48	1720.82	1849.68	1924.63	2707.68	2630.96	2515.51	2889.56	2251.48	1888.22	1981.7	1303.63	936.609	899.32	1345.69
RP156	PE-NMe(16:0/22:6(4Z,7Z,10Z,13Z,16Z,19Z))	HMDB0113058	C44H76NO8P	735.22	735.22	778.538	0.888472	1.54731	1.75762	2.91149	6.47063	2.22055	0.73436	2.65005	3.62287	20.5539	33.7541	52.7315	55.3053	123.851	248.017	275.297	465.769	491.212	496.798	478.64	414.823	444.679	368.819	351.044	400.803	342.865	371.599	382.861	372.298	349.145	388.042	436.128
RP124	PE-NMe(16:0/22:5(4Z,7Z,10Z,13Z,16Z))	HMDB0113056	C44H78NO8P	846.925	846.925	780.554	16.9234	7.34447	8.95018	1.06359	12.0391	3.3596	10.9999	11.7036	5.10529	14.0166	15.7514	21.7265	22.8077	23.423	22.9633	65.2563	1169.76	1065.68	1381	1682.09	1555.21	1447.63	1657.42	1984.31	2918.88	2761.9	2832.22	2159.13	2151.02	2067.16	1857.45	1650.35
RP2758	PE-NMe(15:0/22:6(4Z,7Z,10Z,13Z,16Z,19Z))	HMDB0113036	C43H74NO8P	780.207	780.207	786.506	1.67627	3.87489	10.1079	14.7667	16.7304	20.5063	13.8045	28.1314	34.4818	46.6806	22.0928	51.626	61.3254	69.0899	100.395	342.58	230.418	264.584	261.738	280.437	264.161	225.492	194.035	197.531	183.475	166.976	137.49	137.676	91.9005	96.9666	135.043	43.9568
RP849	PE-NMe(15:0/22:4(7Z,10Z,13Z,16Z))	HMDB0113034	C43H78NO8P	735.228	735.228	785.581	0	0	0.926141	0	0.514046	0	0	1.07498	1.84702	2.81009	0	0.966177	0	0.651255	0	2.83962	85.8706	131.495	506.803	863.38	981.49	1059.75	973.877	912.784	720.995	619.518	1261.28	1756.01	2335.38	2633.76	2537.6	2730.31
RP495	PE-NMe(14:1(9Z)/22:5(7Z,10Z,13Z,16Z,19Z))	HMDB0113014	C42H72NO8P	324.274	324.274	732.497	442.32	455.529	424.089	413.806	422.6	449.635	431.559	440.299	415.552	460.35	433.899	446.306	418.135	449.119	442.445	439.816	459.21	452.805	466.87	456.579	475.05	471.412	491.574	497.54	465.102	471.349	461.763	456.081	454.795	437.684	473.364	441.746
RP434	PE-NMe(14:1(9Z)/22:2(13Z,16Z))	HMDB0113011	C42H78NO8P	780.725	780.725	778.537	0.869813	1.30344	6.03996	3.59215	0.771772	1.55219	3.39459	4.95634	2.84692	7.00718	11.5023	13.7763	14.2506	31.5266	62.1499	90.9003	850.497	743.989	696.025	812.833	573.448	595.578	438.979	429.823	517.347	545.953	531.938	486.553	378.631	402.159	470.814	456.067
RP2801	PE-NMe(14:1(9Z)/20:5(5Z,8Z,11Z,14Z,17Z))	HMDB0113009	C40H68NO8P	341.274	341.274	704.468	99.8543	97.3695	99.0762	89.6871	93.6552	91.3468	85.2055	89.5704	91.1509	97.402	86.8143	93.8731	93.7718	87.7144	86.0619	87.8104	91.206	95.624	87.3669	85.3701	97.3452	93.8233	104.611	100.976	112.331	90.9959	92.2708	83.9038	86.1671	86.2904	85.5952	92.1226
TN734	PE-NMe(14:1(9Z)/14:0)	HMDB0112999	C34H66NO8P	400.283	400.283	686.409	67.4678	70.9192	64.045	58.038	62.095	58.0201	59.6364	56.6841	61.0937	58.1958	57.2078	51.902	48.0397	51.2787	55.5141	55.7061	51.0098	48.0157	43.0844	50.8741	53.8516	53.1138	52.9832	49.7406	51.6291	57.1218	52.9998	58.5312	51.0477	53.969	49.5658	47.9726
RP478	PE-NMe(14:0/22:4(7Z,10Z,13Z,16Z))	HMDB0112993	C42H76NO8P	780.592	780.592	754.537	0	3.79109	1.20824	1.1952	1.88175	2.47374	3.50782	1.91871	2.75512	10.5991	1.25953	1.23939	9.2815	18.1089	41.0713	67.1869	115.04	112.8	170.196	302.406	309.048	419.502	370.735	280.723	258.976	197.242	213.255	266.548	195.575	187.203	238.25	262.102
RP225	PE-NMe(15:0/20:1(11Z))	HMDB0112963	C41H80NO8P	736.127	736.127	768.552	3.61979	1.70806	4.24161	4.07519	0	1.04941	0.97028	1.41459	2.76077	3.71036	4.93735	3.50565	2.43362	5.51462	2.67758	3.26252	288.404	287.163	331.688	372.862	282.773	234.31	219.405	229.594	174.404	199.947	198.56	233.054	236.697	260.358	323.032	585.815
RP764	PE-NMe(14:0/20:1(11Z))	HMDB0112958	C40H78NO8P	850.699	850.699	732.555	27.708	46.8855	27.9666	33.7488	27.9188	32.0771	32.8344	35.1871	29.9828	33.9033	35.2595	31.7327	28.809	38.8323	39.7417	27.3211	44.0884	62.59	304.478	603.144	865.236	926.622	957.482	891.63	658.933	572.034	761.202	868.956	910.848	856.916	864.877	883.427
RP425	PE-NMe(16:1(9Z)/18:1(11Z))	HMDB0112957	C40H76NO8P	847.806	847.806	730.538	1.46084	1.13326	0	1.61191	2.56654	0.476245	2.5383	1.95963	0	0.658875	1.6233	1.83897	4.41449	3.3634	2.24063	1.79383	163.783	155.451	216.035	222.063	175.967	207.877	256.483	282.958	266.552	234.844	258.578	183.772	162.799	166.306	134.075	97.3693
RP1802	PE-NMe(15:0/16:1(9Z))	HMDB0112945	C37H72NO8P	340.156	340.156	712.49	65.6464	103.33	73.0041	75.8427	72.1408	69.4581	80.4178	75.367	81.2224	85.8862	81.5449	76.7532	75.084	82.1281	80.0931	76.5169	87.7407	75.8727	85.3969	78.751	80.0346	82.3229	87.7134	84.5592	87.4675	78.5774	85.099	83.3048	91.5514	82.7358	95.5739	83.1757
RP1468	PE-NMe(14:0/14:1(9Z))	HMDB0112937	C34H66NO8P	358.228	358.228	665.483	40.8402	45.3599	42.7077	41.0636	46.1607	40.229	33.7466	47.4202	47.4862	43.738	45.7971	43.9813	44.7219	42.8714	46.6262	41.5123	46.0426	50.1321	46.9661	46.0329	54.3473	46.2263	45.2459	42.8242	48.4691	42.5486	52.0113	51.4447	52.6312	42.7663	44.3679	45.491
RP2192	PS(24:1(15Z)/24:1(15Z))	HMDB0112934	C54H102NO10P	707.457	707.457	994.682	507.034	234.744	606.699	514.794	528.745	547.841	585.415	569.398	472.346	394.351	305.206	409.559	432.359	295.498	287.842	454.57	468.014	461.628	599.344	577.207	505.21	356.445	504.286	360.311	407.075	324.298	535.24	204.881	323.38	358.634	358.969	276.529
TN937	PS(24:1(15Z)/16:0)	HMDB0112913	C46H88NO10P	397.422	397.422	884.587	16.1324	16.5213	12.8225	13.6136	13.8562	10.7316	9.67885	11.251	10.9025	11.7905	10.2781	14.1316	11.6546	9.07305	10.2901	12.8089	11.4109	11.4837	7.67671	12.1544	11.6568	14.6	10.5298	10.0155	11.7924	11.3876	9.37749	11.1598	10.1221	10.9573	8.47729	9.53403
RP833	PS(24:1(15Z)/15:0)	HMDB0112912	C45H86NO10P	739.171	739.171	870.559	1.78989	31.9076	23.6313	22.2094	18.0808	12.853	35.7587	22.0354	38.3138	34.7255	24.5994	29.1798	29.0533	30.0581	24.4297	28.3025	79.9894	84.721	64.2692	64.6467	43.0484	71.1773	72.8059	83.2894	75.1834	56.1526	48.1049	54.6537	36.3162	41.569	53.1712	45.9253
RP604	PS(24:1(15Z)/14:0)	HMDB0112910	C44H84NO10P	733.972	733.972	800.576	0.462104	0	0.941459	6.45267	0.760929	0.743978	0.942753	2.7699	7.02467	4.07975	7.47184	6.71064	3.87118	10.4878	18.3222	16.0126	21.0844	34.9945	56.8818	74.7585	72.944	105.766	61.527	105.131	50.1034	55.8715	90.6327	103.917	148.995	145.937	131.162	144.568
TN912	PS(24:0/24:1(15Z))	HMDB0112909	C54H104NO10P	64.9226	64.9226	958.752	13.0881	10.6671	6.60166	8.92866	8.50122	9.8868	9.35292	8.00044	8.99944	5.33889	7.97837	7.98565	8.344	8.29644	10.7524	10.2463	6.73894	8.8157	8.07993	6.46361	8.7175	5.84916	9.0281	9.77426	5.50086	8.23222	5.47681	8.44967	6.21338	9.24829	6.05606	6.42126
TN683	PS(24:0/24:0)	HMDB0112908	C54H106NO10P	64.676	64.676	982.731	9.95113	5.90469	4.99711	7.61963	5.94866	5.80513	7.95469	9.13409	9.91775	5.5368	6.73379	9.4986	7.19657	5.19729	10.2833	8.30685	6.86465	6.79344	7.32945	5.82325	8.5314	6.97004	5.42724	5.45337	4.88576	5.50016	7.3582	4.41093	6.5671	9.86157	4.39913	4.88574
RP1498	PS(22:6(4Z,7Z,10Z,13Z,16Z,19Z)/24:1(15Z))	HMDB0112880	C52H88NO10P	600.868	600.868	956.579	73.1162	14.0489	63.2079	81.9617	50.8703	37.0872	54.9102	48.9278	37.7673	72.3467	36.8152	59.1477	34.0225	46.8093	19.2071	55.2009	53.0943	41.591	35.4173	55.2088	79.7275	25.9363	44.1071	43.9962	27.0115	18.0088	34.5423	16.7846	26.3614	24.239	32.3792	18.2157
TN933	PS(22:5(7Z,10Z,13Z,16Z,19Z)/22:2(13Z,16Z))	HMDB0112858	C50H84NO10P	838.55	838.55	928.552	20.6043	23.0304	16.9434	17.5353	22.2781	13.4538	24.5516	32.7262	16.1843	7.48004	6.54084	19.2187	0.512731	7.58638	17.8185	23.5995	10.6693	23.838	17.1607	16.9023	10.6129	6.54102	13.7095	7.85754	5.94435	12.2681	10.812	6.08215	8.72861	9.07551	10.5639	15.3122
RP552	PS(22:1(13Z)/24:1(15Z))	HMDB0112760	C52H98NO10P	856.099	856.099	966.653	0	0	2.50529	2.32094	1.43525	1.60044	4.27861	1.16954	5.61688	1.06428	0.495997	3.63695	1.66102	1.14501	2.85513	0.700588	17.1214	17.8496	32.6776	31.3332	14.0711	6.87259	8.24992	7.85614	13.7844	17.2059	31.4018	6.27897	7.81472	13.1654	7.99065	2.362
RP359	PS(22:1(13Z)/16:1(9Z))	HMDB0112740	C44H82NO10P	850.195	850.195	798.563	15.604	6.62428	6.92192	3.72496	5.67763	6.55658	7.41466	12.0117	13.6383	13.929	15.3952	35.1064	20.5288	24.4982	20.2355	36.947	63.5043	123.414	246.808	343.659	310.43	298.123	296.51	252.367	196.291	211.884	278.663	264.236	279.855	283.72	293.126	270.991
RP2844	PS(22:1(13Z)/15:0)	HMDB0112738	C43H82NO10P	322.003	322.003	821.603	14.4308	16.5384	15.4731	15.869	15.1213	19.9482	20.8493	20.0017	17.3184	17.777	14.8174	14.9791	14.7871	14.306	15.8677	15.4169	15.2089	16.3636	15.7101	14.9926	14.3161	20.155	16.8706	15.1674	18.3449	17.2991	13.5691	20.4808	18.2104	11.5287	15.5643	15.9686
RP1007	PS(20:5(5Z,8Z,11Z,14Z,17Z)/24:1(15Z))	HMDB0112706	C50H86NO10P	666.494	666.494	930.564	123.559	65.4198	98.5889	100.772	90.9543	86.8672	99.3662	96.2573	85.793	57.5905	61.741	87.6514	74.916	68.6936	50.5425	70.7501	60.3288	68.2045	79.6711	69.255	51.0527	50.7342	63.0329	69.2149	46.8759	79.3448	94.6231	30.4173	57.7278	50.1171	44.2125	46.4957
TN117	PS(20:3(5Z,8Z,11Z)/15:0)	HMDB0112595	C41H74NO10P	386.713	386.713	754.508	161.439	160.462	138.785	140.752	137.03	134.345	137.342	141.869	134.612	137.431	139.493	137.87	137.058	141.991	135.792	132.273	131	131.624	123.414	130.152	122.898	127.937	127.816	123.496	124.631	122.076	122.812	120.959	121.005	127.7	122.821	120.494
TN2298	PS(20:2(11Z,14Z)/18:0)	HMDB0112572	C44H82NO10P	550.57	550.57	816.576	9.27759	30.0398	5.21808	36.2153	10.6092	6.25176	15.613	6.86983	67.1983	9.9732	155.589	14.4111	2.43385	39.1368	22.2806	84.3532	18.0205	4.30562	24.5538	23.8126	33.9289	14.738	22.8325	6.93914	317.561	7.16787	9.17478	102.277	139.055	21.7281	2.02627	7.86806
TN708	PS(20:1(11Z)/15:0)	HMDB0112542	C41H78NO10P	359.132	359.132	740.527	33.8417	37.8292	28.6172	28.8266	28.4965	26.3488	29.2779	29.4201	29.9434	28.9205	29.3301	27.8663	27.2768	31.2137	28.2886	28.2442	28.6355	29.0149	21.8253	23.5685	30.1911	28.4581	28.0212	24.4994	23.8894	26.1463	27.1577	24.3302	23.812	25.6037	27.9888	27.0735
TN956	PS(18:4(6Z,9Z,12Z,15Z)/14:1(9Z))	HMDB0112486	C38H64NO10P	378.946	378.946	708.436	35.1624	34.4023	32.9852	27.7355	31.8756	28.6718	30.7995	32.507	29.377	30.7971	29.2488	26.1894	24.4752	30.1992	33.7344	28.5538	26.9188	25.8655	27.8671	29.7579	27.1311	29.8838	29.501	28.1063	29.2109	29.3746	27.4992	28.2866	25.7853	29.0938	30.391	27.0603
TN1306	PS(18:3(6Z,9Z,12Z)/24:1(15Z))	HMDB0112467	C48H86NO10P	838.608	838.608	906.571	38.6501	27.0107	28.7829	23.4382	24.2225	18.0941	25.1766	14.5942	27.7484	13.0972	6.46282	8.33695	2.89575	19.4164	25.1556	22.5303	14.4679	10.6699	35.578	29.4009	28.8539	14.347	26.0214	19.6071	7.2982	2.79855	17.9032	2.57664	18.3244	10.5729	5.89886	10.2828
RP2763	PS(18:2(9Z,12Z)/24:1(15Z))	HMDB0112442	C48H88NO10P	666.728	666.728	908.582	1330.82	467.477	1484.59	990.077	1057.68	1418.22	1318.91	1214.03	789.275	663.966	450.345	733.66	685.499	585.558	543.127	717.643	930.544	959.742	1492.73	1621.3	1195.31	561.02	934.591	809.007	710.975	670.902	1044.33	287.288	744.951	669.473	678.57	457.354
RP2261	PS(18:2(9Z,12Z)/15:0)	HMDB0112425	C39H72NO10P	325.508	325.508	746.492	53.1975	54.719	40.9931	41.0783	65.9083	54.7561	45.2172	61.8637	50.2501	45.6516	51.9849	79.2811	45.9565	77.605	45.8192	46.4591	47.6907	55.2024	47.8332	44.8389	46.5736	53.348	47.5744	47.705	44.3648	49.6617	51.7749	51.0976	44.6531	40.2303	51.4333	37.9495
RP114	PS(18:1(11Z)/22:2(13Z,16Z))	HMDB0112402	C46H84NO10P	849.8	849.8	824.576	1.15602	1.51539	5.41543	3.46124	5.58007	3.44444	2.12488	8.28901	8.11934	8.14304	6.30798	10.6552	5.1515	16.681	11.6021	19.5864	94.1703	89.0082	74.2285	96.5381	113.869	125.491	138.358	127.553	121.018	122.199	110.15	94.6542	118.659	130.135	110.309	115.234
RP79	PS(18:0/22:4(7Z,10Z,13Z,16Z))	HMDB0112382	C46H82NO10P	850.103	850.103	822.564	5.71591	7.7713	9.81974	6.07292	8.03991	5.24701	14.5594	14.8272	13.6955	15.7646	18.1932	34.7937	18.9572	23.9405	21.8101	43.845	423.811	383.389	309.707	305.953	371.756	333.26	357.121	367.526	371.272	324.379	335.608	348.984	339.567	319.81	325.644	308.94
TN292	PS(16:0/24:1(15Z))	HMDB0112356	C46H88NO10P	398.474	398.474	868.597	44.2014	42.2355	36.0592	33.8772	34.2866	36.1845	36.7665	32.4652	33.9628	33.0038	33.3948	32.307	39.112	31.6367	34.9311	35.198	35.0301	32.9369	31.709	33.125	30.5382	33.8698	31.0066	28.8017	27.2618	29.5748	28.6901	29.8462	31.7765	28.5875	30.7473	29.1564
TN131	PS(18:1(11Z)/16:1(9Z))	HMDB0112271	C40H74NO10P	420.119	420.119	724.504	138.157	143.256	123.2	117.562	116.152	126.324	121.621	131.096	117.607	122.15	116.472	119.202	119.144	118.622	117.09	112.268	108.209	111.758	114.456	110.765	112.748	107.949	111.329	109.147	104.436	106.797	110.234	107.799	101.92	104.209	107.802	106.122
RP53	CE(3M5)	HMDB0112213	C40H64O3	779.999	779.999	631.451	49.7477	110.446	100.085	108.93	93.43	103.171	103.621	117.12	126.822	106.727	39.7956	113.709	122.422	134.415	123.932	126.531	24.411	27.6484	27.1512	27.0138	34.0935	41.1796	23.4002	36.3908	18.5228	26.6685	21.1941	10.3775	7.13522	25.4998	15.8486	25.1615
TN1150	FAHFA(22:6(4Z,7Z,10Z,13Z,16Z,19Z)/14-O-22:6(4Z,7Z,10Z,13Z,16Z,19Z))	HMDB0112171	C44H62O4	1141.5	1141.5	655.474	4.15665	16.9227	12.8967	17.5637	14.7608	11.719	16.0048	13.5133	13.2909	13.5388	12.8393	21.7729	5.02452	13.697	13.0042	17.3289	19.493	16.1802	12.8766	16.5405	6.80274	7.79352	5.77693	7.83978	17.9756	19.0758	12.4083	10.2104	14.344	11.1626	12.4453	4.20559
TN967	FAHFA(22:6(4Z,7Z,10Z,13Z,16Z,19Z)/9-O-18:2(10E,12Z))	HMDB0112169	C40H62O4	1164.02	1164.02	607.477	10.0707	11.701	27.2405	18.7769	14.9115	22.1738	12.2804	18.1264	7.06842	9.96251	9.03726	13.1247	4.94595	5.30112	12.5862	14.243	1.27474	13.243	7.31809	29.7473	6.46897	6.57093	6.32012	10.4383	6.18229	11.5835	13.0505	2.70586	2.9788	1.78884	0.0873748	8.009
RP922	5-Hexyl-3,4-dimethyl-2-furannonanoic acid	HMDB0112101	C21H36O3	888.97	888.97	337.273	19.3103	6.24047	5.74528	7.57189	7.72386	5.27184	7.49469	6.90288	6.33064	5.91182	5.46587	5.91735	5.15774	5.52079	6.06647	6.38946	219.26	164.569	718.08	485.886	446.59	362.699	203.13	559.215	933.679	360.193	605.675	155.272	1695.18	416.107	763.267	420.867
RP2843	5-Butyl-2-furanoctanoic acid	HMDB0112097	C16H26O3	727.277	727.277	284.221	16.2334	326.79	262.487	358.332	258.073	193.688	262.334	337.665	266.966	77.8801	80.7065	69.414	154.373	91.2966	62.453	45.2071	151.958	335.638	364.675	279.995	282.568	272.8	133.973	299.14	318.478	125.744	54.7536	155.963	40.1981	69.653	63.5822	93.1745
RP258	12,15-Epoxy-13,14-dimethyleicosa-12,14,16-trienoic acid	HMDB0112073	C22H36O3	779.981	779.981	349.274	81.7248	66.6007	119.31	84.223	90.8539	83.4621	97.2196	112.701	103.695	86.7063	93.306	61.2454	91.956	74.4379	98.0849	94.6669	35.3133	48.997	59.4073	78.2781	67.3639	52.5897	52.9073	68.5124	58.1504	61.5305	47.4669	42.4099	25.5173	40.6649	40.4757	60.0729
RP1905	TG(i-14:0/10:0/8:0)	HMDB0099231	C35H66O6	297.338	297.338	583.497	32.9943	31.0239	27.0762	24.4325	26.102	30.699	32.4545	26.7529	40.7893	30.7772	34.4959	34.2792	32.817	35.6533	41.9948	34.1444	34.4389	46.7383	35.5287	35.8136	27.4022	41.054	36.4636	32.8051	25.8377	45.1344	41.8714	39.0396	36.6301	30.1529	33.2378	36.7743
RP621	TG(i-13:0/8:0/8:0)	HMDB0096560	C32H60O6	341.818	341.818	541.447	39.4056	34.9777	39.2376	34.0802	34.1666	30.9378	34.6619	35.989	25.8213	36.9188	34.2028	31.1825	36.7172	37.1211	25.8206	33.9534	35.7871	39.0348	41.2705	35.8006	38.8217	38.7284	41.2173	40.8581	34.9014	41.4913	42.544	41.5089	39.952	37.0264	39.642	40.8765
TN1307	TG(12:0/15:0/22:0)	HMDB0095502	C52H100O6	65.0565	65.0565	821.751	15.2426	9.78927	9.26402	11.7664	8.50217	13.0835	7.39018	9.64984	10.0684	9.04658	6.40022	11.3293	8.30949	8.35115	10.8038	11.2903	7.86532	10.4988	7.88921	7.79062	7.0342	6.75674	11.9762	10.5185	8.22791	6.13748	9.86786	10.3584	12.4248	8.63932	7.30612	8.65828
RP709	4-octenoylglycine	HMDB0094803	C10H17NO3	246.882	246.882	217.154	196.994	191.583	208.67	208.185	200.276	189.27	218.925	190.628	223.04	222.059	218.762	204.949	206.442	207.968	209.941	207.866	228.844	222.591	233.54	249.544	247.187	253.172	224.991	236.965	229.868	231.576	237.124	219.133	233.34	241.96	251.306	225.832
RP2036	5-hydroxyhexanoylglycine	HMDB0094722	C8H15NO4	75.409	75.409	190.108	22.8457	16.889	35.6233	35.9569	53.5698	42.8932	42.9809	25.075	18.087	35.5568	42.8063	26.3954	20.7	42.5305	34.6784	37.7437	39.904	39.3707	28.7156	47.6234	34.8109	42.4445	45.8158	44.6197	53.0061	62.1336	37.7243	40.1583	36.662	35.6054	49.1931	44.8002
RP599	N-Methyl proline	HMDB0094696	C6H11NO2	64.5845	64.5845	147.109	486.886	659.061	559.745	546.894	616.865	471.002	513.088	485.706	584.092	601.648	663.278	546.865	611.2	617.207	636.445	631.462	623.286	626	630.061	721.117	753.338	691.208	730.764	698.658	852.862	743.975	751.922	680.323	705.306	901.114	929.756	893.842
RP1364	Octadecenoylcarnitine	HMDB0094687	C25H47NO4	580.888	580.888	448.339	716.122	580.165	300.869	451.251	448.914	644.135	250.11	280.815	404.573	231.662	605.635	643.84	498.405	380.09	338.095	450.361	1012.3	1023.48	969.924	489.178	614.487	522.41	857.091	597.65	928.655	720.246	710.595	798.01	1323.62	438.848	423.441	352.771
RP1590	Trimethylsilyl heptadecanoic acid	HMDB0094683	C20H42O2Si	820.625	820.625	365.285	46.6294	147.974	87.2734	212.276	121.079	74.1778	194.065	88.3275	99.4257	100.041	88.2015	66.3577	109.324	98.0649	86.2074	81.7344	61.9596	65.3219	90.5436	90.9963	111.829	102.479	94.1382	86.6519	91.622	65.5917	61.8766	72.8907	41.0998	44.4697	123.847	152.703
RP3182	Val-Val-Val	HMDB0094676	C15H29N3O4	308.09	308.09	298.212	58.0194	61.6708	54.3681	52.0066	50.7736	50.5021	53.6808	58.4756	56.7765	50.5277	55.8695	61.6704	54.2407	56.2036	51.7032	53.089	51.3397	52.7193	57.0957	53.0198	50.0742	53.594	52.632	55.5801	54.8214	47.5787	52.057	54.3245	54.1551	44.6559	50.0565	57.3238
RP2762	1,4-Bis-(1,1-dimethylethyl)-benzene	HMDB0094670	C14H22	736.965	736.965	191.179	41.5853	110.041	80.4595	103.602	92.0624	120.009	138.391	131.156	144.052	117.709	104.635	100.491	90.9724	118.318	92.851	86.1306	91.9696	123.217	143.057	167.434	149.063	136.782	108.826	128.053	139.383	120.097	123.865	138.397	79.1672	90.9485	90.3706	106.351
RP1867	1-Methylethyl heptanoic acid	HMDB0094654	C10H20O2	675.707	675.707	173.154	11.6527	79.6304	10.1559	9.76857	16.8186	15.1853	13.5264	9.79855	11.9643	14.6739	13.7325	11.4265	15.1319	13.4073	17.1888	15.6327	10.1027	10.4637	10.297	9.44028	8.23157	6.14151	11.0014	9.81471	9.26659	7.75599	9.12597	8.81868	7.47808	7.61769	7.04449	6.01932
RP12	Leu-Leu-Leu	HMDB0094648	C18H35N3O4	822.124	822.124	396.222	232.475	182.95	196.525	178.486	160.39	153.742	199.311	172.717	136.061	127.797	147.634	153.959	144.851	136.711	130.432	135.748	40.2824	43.9577	67.0344	51.5966	31.3319	25.6204	29.7219	35.2993	39.2182	19.7644	19.4886	13.4926	19.4589	17.8527	17.5153	13.0102
TN1331	DG(a-25:0/i-24:0/0:0)	HMDB0094638	C52H102O5	65.3094	65.3094	807.788	13.4378	9.31232	5.89771	9.85932	7.63447	9.2417	10.9461	9.68761	10.9175	7.91478	9.32524	11.7539	8.09513	6.71687	8.04054	10.1535	11.3441	7.53724	15.0678	10.9441	9.32069	5.47465	11.3887	8.77086	10.2673	8.28221	10.919	9.71416	9.53113	10.1147	11.3735	10.4278
TN516	DG(8:0/0:0/8:0)	HMDB0092900	C19H36O5	968.879	968.879	327.255	2.63953	1.99708	3.38624	3.16651	2.46386	2.17568	2.1788	2.2778	2.3011	2.8879	2.27526	2.09992	1.44457	1.81109	2.17097	1.25692	169.434	163.691	3.62935	0.995427	3.3336	2.46685	1.88079	5.10865	166.394	203.873	138.684	153.745	102.12	146.324	145.388	29.7264
RP1638	MG(0:0/i-16:0/0:0)	HMDB0072873	C19H38O4	666.525	666.525	313.273	659.285	505.905	833.465	634.749	727.332	868.673	782.345	698.861	715.691	506.231	476.469	583.956	617.694	504.535	536.18	626.742	720.282	807.336	1118.25	1093.36	901.922	648.289	807.541	823.266	656.572	726.528	815.243	530.665	759.086	679.734	692.406	578.188
TN786	MG(0:0/i-13:0/0:0)	HMDB0072870	C16H32O4	863.665	863.665	271.228	165.675	101.563	92.1329	98.9142	101.933	101.917	97.2619	83.3264	86.5277	78.6691	95.6802	106.233	30.4952	81.3753	88.9624	82.2481	282.863	304.714	96.7941	69.9788	70.0976	98.924	70.2955	61.8534	342.777	545.817	395.195	537.388	208.489	384.299	63.2698	41.3874
TN1052	MG(0:0/13:0/0:0)	HMDB0072861	C16H32O4	1161.83	1161.83	253.218	2450.79	2058.41	2534.84	1626.96	1168.25	1441.58	1733.13	1471.34	468.599	615.673	477.522	891.183	244.637	574.221	392.175	604.639	3995.71	4231.38	3053.84	3675.52	2951.68	1773.52	3932.85	3716.33	1435.84	630.177	1423.97	437.926	816.865	796.614	758.41	976.041
RP624	MG(a-21:0/0:0/0:0)[rac]	HMDB0072855	C24H48O4	352.715	352.715	439.323	130.241	124.455	122.349	117.678	123.252	121.955	126.541	127.295	124.934	122.745	123.939	126.616	123.41	127.446	122.798	123.391	135.446	127.714	140.631	129.235	133.276	135.675	140.718	135.105	137.05	122.476	135.425	131.006	137.084	128.162	128.449	135.122
RP1274	TG(8:0/8:0/13:0)	HMDB0072647	C32H60O6	340.832	340.832	563.431	56.1145	54.3182	49.2113	53.4079	49.4298	50.5322	44.6328	52.2673	49.2752	51.2548	44.8318	52.4121	44.7669	49.6025	48.7333	50.1892	56.5304	46.6198	54.16	56.484	54.9957	58.0024	59.264	55.0429	52.5761	52.8518	56.6728	52.0836	52.512	49.0559	55.7175	51.5184
RP2934	TG(8:0/8:0/10:0)	HMDB0072251	C29H54O6	333.33	333.33	499.404	157.119	142.295	137.255	118.009	131.764	138.668	135.677	138.643	123.487	130.395	119.108	143.544	134.04	137.151	110.664	126.334	136.582	136.582	126.629	129.204	128.29	103.278	132.039	141.977	120.376	124.671	118.057	112.09	125.22	109.218	106.619	137.889
TN2610	Sulfoglycolithocholate(2-)	HMDB0062801	C26H43NO7S	538.914	538.914	496.276	275.241	276.366	160.325	906.565	171.129	99.5988	185.223	195.959	387.413	145.685	617.859	230.007	235.615	249.307	148.183	545.093	237.271	89.5161	237.496	321.262	289.98	218.62	148.624	537.468	807.488	149.545	132.954	363.01	835.782	223.766	118.428	107.21
TN716	11-nor-9-carboxy-Delta(9)-tetrahydrocannabinol	HMDB0062770	C21H28O4	1121.54	1121.54	345.206	38.6323	36.6291	43.2701	36.8215	40.9238	37.963	48.3888	34.1853	20.2617	32.0717	26.7317	48.367	14.498	28.936	29.8551	35.3824	54.1439	51.6563	52.3668	51.5185	46.5043	43.3746	54.4168	54.4189	47.5797	29.5307	48.5991	20.4903	43.3765	31.103	34.4033	32.808
TN2005	Selenate	HMDB0062761	H2O4Se	66.6301	66.6301	110.9	4.60744	5.71875	2.99816	7.67725	4.01706	4.04348	5.31325	5.49558	4.92589	2.83384	4.44011	4.89037	2.48901	4.47995	4.79973	8.03596	7.10119	3.85385	5.1152	5.67246	3.83247	4.33388	4.84142	5.06845	4.97537	3.07388	3.15655	4.18051	6.50417	2.05823	3.70766	3.79233
RP1726	7alpha-hydroxy-3-oxochol-4-en-24-oic Acid	HMDB0062744	C24H36O4	488.725	488.725	389.267	224.408	323.691	425.15	989.961	372.665	286.142	649.515	694.785	395.233	90.8488	831.477	84.2012	136.299	244.121	285.016	931.465	146.585	90.4355	540.128	235.094	481.815	217.045	113.063	181.96	1808.32	110.516	343.512	238.911	689.494	246.222	132.249	212.677
TN1641	12alpha-hydroxy-3-oxo-5beta-cholan-24-oic Acid	HMDB0062742	C24H38O4	1201.46	1201.46	355.265	144.915	180.924	409.555	157.388	109.915	137.323	95.7742	115.935	57.4945	88.3369	49.7185	18.4609	9.80535	42.5902	27.7579	33.8533	59.8568	55.0342	98.3569	183.374	123.991	84.9668	87.9854	122.261	57.821	23.8617	56.447	35.011	63.4181	71.9347	68.4703	78.4619
TN1199	(9E)-10-nitrooctadecenoic Acid	HMDB0062737	C18H33NO4	1011.22	1011.22	310.237	48.5972	31.2067	33.9814	30.5317	23.7982	44.7548	49.0581	39.6683	15.6307	9.38966	12.6706	28.8211	4.98981	12.4497	11.0036	15.8572	56.3487	52.7655	93.7026	30.8362	31.6066	30.9217	62.132	98.39	24.3498	52.4916	69.9552	58.3138	45.1143	25.3223	19.4901	21.8279
TN2792	(25R)-3beta,4beta-dihydroxycholest-5-en-26-al	HMDB0062736	C27H44O3	447.118	447.118	439.315	39.2006	34.9962	32.4481	31.4953	33.1459	31.7783	32.8231	30.967	32.3483	30.6495	30.5961	35.7454	27.3651	32.8784	31.4205	30.862	30.1808	28.1413	31.3499	33.4734	30.2821	33.2971	31.4435	29.99	26.5527	33.2376	30.7378	31.9508	27.7844	34.4345	33.7607	30.5874
RP2395	(R)-3-hydroxybutyrylcarnitine	HMDB0062735	C11H21NO5	124.381	124.381	248.148	310.315	478.501	142.387	131.74	378.088	222.855	57.9128	83.2084	189.215	162.163	323.822	398.037	736.608	285.246	288.292	183.772	131.212	220.765	421.432	149.535	239.474	290.465	287.911	191.472	166.704	114.133	105.813	341.49	368.358	179.668	165.177	303.652
RP373	Ethyl Arachidonate	HMDB0062725	C22H36O2	725.432	725.432	333.278	1054.66	99.9829	1148.68	763.372	946.786	996.246	1707	1519.68	1032.61	1310.23	759.01	865.711	810.056	751.893	773.79	595.003	415.743	132.817	278.521	187.988	278.539	358.802	96.0148	166.944	141.775	75.2964	94.1889	19.7432	23.8403	27.9125	7.69715	29.1725
TN614	O-phosphonato-L-homoserine(2-)	HMDB0062692	C4H10NO6P	184.61	184.61	222.013	34.9145	34.0398	33.6296	25.6694	20.0249	22.8773	41.703	23.0496	37.0821	20.4507	24.8559	25.268	15.0505	31.8786	26.367	16.7172	58.8998	31.5914	15.4736	24.8658	57.0507	37.3308	35.5443	29.6021	34.7648	47.0979	32.4774	32.3535	41.7767	28.2382	50.7825	28.4773
RP2706	14-oxo-DoHE(1-)	HMDB0062685	C22H30O3	822.653	822.653	360.253	715.856	587.03	832.23	711.293	705.314	643.093	807.654	671.857	619.579	579.437	637.518	681.076	737.267	615.83	600.344	693.421	760.082	757.477	1056.74	850.566	739.289	520.79	808.982	813.771	767.594	532.505	796.198	371.526	365.428	511.305	489.314	421.323
RP736	5(S),15(R)-DiHETE(1-)	HMDB0062684	C20H32O4	780.431	780.431	354.268	670.127	81.8126	1038.22	1190.44	1125.08	107.762	932.861	921.54	1099	924.058	811.928	784.916	983.458	859.024	846.51	715.957	500.215	575.326	668.322	762.963	574.092	568.476	391.962	564.933	479.759	508.151	373.856	353.477	271.443	253.374	272.386	321.843
RP1759	19-hydroxyprostaglandin H2(1-)	HMDB0062683	C20H32O6	502.289	502.289	386.253	40.1682	172.096	31.5766	129.777	64.6293	94.2157	47.015	53.7947	102.761	113.024	140.755	318.988	114.657	185.557	93.1589	193.673	70.9239	27.4564	58.915	56.9137	105.814	109.169	78.8416	95.833	222.474	146.686	154.064	172.625	259.972	199.443	115.693	113.805
RP742	17beta-hydroxy-5beta-estran-3-one	HMDB0062677	C18H28O2	676.334	676.334	294.243	124.015	224.249	80.0472	192.947	81.8686	123.698	117.7	93.8814	214.057	156.504	194.794	150.847	207.641	112.077	157.036	124.819	63.1904	59.0129	17.4437	43.8885	57.9461	71.233	73.8701	59.3235	60.8413	29.4699	26.2	74.2884	64.3783	58.7208	63.5368	60.4124
RP1356	(3E)-2,3,4-trimethylhex-3-enal	HMDB0062671	C9H16O	515.268	515.268	158.153	231.043	219.698	230.943	212.375	229.039	224.297	224.964	222.316	227.132	223.202	220.793	227.946	223.588	223.468	217.305	227.898	230.184	221.219	238.547	233.979	231.383	233.18	243.367	237.294	218.191	221.281	225.791	237.278	220.432	215.081	226.695	225.186
TN2139	Triethylene Glycol Monomethyl Ether	HMDB0062666	C7H16O4	449.191	449.191	187.091	186.669	139.472	170.834	135.181	152.427	162.56	151.233	167.762	137.511	116.663	116.857	148.057	109.796	155.083	140.858	158.273	149.222	141.005	160.518	138.948	136.601	118.519	147.966	131.685	92.9041	138.366	134.089	128.543	154.127	150.001	138.825	133.135
TN1410	Linoleamide	HMDB0062656	C18H33NO	1164.66	1164.66	318.215	25.7713	20.4317	27.7455	22.7659	31.1798	30.827	26.501	27.8982	18.6229	22.8729	19.2742	18.496	7.0851	15.5575	15.5032	21.3757	21.3929	15.6195	24.3966	27.3366	22.1213	15.9971	23.0796	21.401	35.3575	23.4211	27.4693	16.855	17.9515	17.1419	16.3918	12.9364
RP1203	(10E,12Z)-9-HODE	HMDB0062652	C18H32O3	779.992	779.992	297.239	412.769	633.321	566.907	639.411	715.348	1100.33	472.081	487.49	519.328	528.543	843.79	459.179	462.584	523.979	434.01	414.464	430.243	531.284	548.484	616.587	542.6	489.048	393.257	450.243	459.279	500.744	401.885	455.878	294.623	306.03	304.779	312.135
TN2191	(6R)-5,10-methenyltetrahydrofolate	HMDB0062623	C20H20N7O6	134.017	134.017	494.116	19.3448	16.3622	48.2286	15.2933	57.9616	15.2614	96.5355	14.4847	92.2371	14.4688	101.667	16.9314	9.90727	12.87	106.409	17.4912	84.853	15.0654	129.351	17.885	123.525	66.9363	80.2282	38.2314	13.066	97.5334	14.7764	17.6325	48.5409	17.2471	97.0205	20.4548
TN2281	L-threonic Acid	HMDB0062620	C4H8O5	71.1824	71.1824	101.025	16.4886	31.4608	26.7213	24.5035	18.4029	16.32	25.4201	23.7506	15.1049	36.9852	28.0755	20.3136	9.88426	29.3145	23.5666	19.8662	16.9233	11.5266	10.5408	29.1843	19.4556	35.9192	16.4125	22.169	19.1422	14.8252	13.3998	14.9547	15.7978	132.921	18.8533	27.1766
TN605	Methyl Arachidonate	HMDB0062594	C21H34O2	1139.87	1139.87	283.244	210.888	330.362	238.77	303.332	771.18	942.054	762.081	565.821	662.86	764.049	797.805	900.07	1120.19	1168.33	475.186	217.529	268.364	261.697	326.305	349.498	255.397	205.608	254.072	240.397	301.775	275.824	295.437	232.076	269.737	268.815	198.126	150.864
RP3399	Prostaglandin G2 2-glyceryl Ester	HMDB0062591	C23H38O8	667.142	667.142	465.244	138.998	68.5593	119.572	92.9577	55.1712	125.702	136.54	125.088	62.3931	95.9394	90.513	123.462	67.7187	109.98	101.807	128.112	98.815	110.574	154.077	93.8349	114.98	97.0245	136.991	126.444	112.343	101.833	130.513	73.9119	73.8262	98.375	105.778	96.6324
TN859	(3R,5S)-1-pyrroline-3-hydroxy-5-carboxylic Acid	HMDB0062585	C5H7NO3	118.452	118.452	152.029	754.173	615.73	622.273	706.38	628.967	632.95	627.424	606.22	647.692	589.536	694.612	654.469	208.631	673.179	714.538	735.205	789.185	716.74	721.682	754.96	688.001	682.515	723.916	636.289	753.01	807.161	765.174	729.664	807.748	944.242	638.524	783.502
TN1130	5-phospho-beta-D-ribosylaminium(1-)	HMDB0062576	C5H12NO7P	67.7048	67.7048	212.033	12.2828	12.516	9.99711	15.7258	8.43458	15.9796	8.23938	14.9017	16.764	9.54127	14.5355	14.7937	6.99618	14.0859	13.8805	17.2759	13.8788	12.1206	18.4306	12.0075	11.5503	10.5444	9.12794	14.8615	17.6065	18.2159	18.3495	14.8944	21.31	14.3793	17.4505	19.5962
RP1617	4-fumarylacetoacetate(2-)	HMDB0062563	C8H8O6	62.4335	62.4335	223.022	208.954	205.273	252.087	290.493	250.554	246.797	249.014	229.509	256.268	217.704	260.605	212.556	207.37	230.011	258.781	301.546	476.321	296.372	497.836	256.92	252.798	247.28	294.994	278.539	332.254	292.981	289.484	257.562	262.233	256.071	276.813	257.034
RP1176	Ac-Ser-Asp-Lys-Pro-OH	HMDB0062552	C20H33N5O9	667.77	667.77	510.213	52.3346	24.1772	40.2885	31.6495	33.3791	38.5516	47.514	45.108	43.7364	43.1599	27.5305	41.7567	35.3607	45.7869	46.5496	44.6254	40.8236	47.5079	46.0328	64.371	59.203	31.7471	72.7265	69.3174	59.4539	50.991	62.6697	41.4689	51.4716	66.221	58.312	49.6685
RP2963	4-ethylphenylsulfate	HMDB0062551	C8H10O4S	64.0101	64.0101	225.02	43.2545	62.0319	72.0091	74.6736	56.8477	49.7408	67.976	66.7352	53.4454	65.4725	60.2799	47.0708	48.4785	58.8682	58.4407	62.3316	62.2169	47.523	65.8984	67.3004	64.7962	63.3207	57.5506	62.685	66.5065	47.4083	49.256	46.13	55.2733	60.4191	59.3904	58.9873
TN889	2';-deoxycytidine 3';-monophosphate	HMDB0062545	C9H14N3O7P	131.377	131.377	290.054	72.8946	37.9766	53.7716	33.3147	48.6376	29.8149	54.5679	34.3977	39.7598	35.4751	40.6877	30.5924	30.0401	37.5861	39.2386	35.2917	44.7396	35.1862	57.0282	73.5635	62.4874	52.0722	56.6871	51.8311	47.706	45.1947	39.6845	58.6053	57.2593	41.2503	51.2654	57.0209
RP1413	TetraHCA	HMDB0062534	C27H46O6	602.684	602.684	505.289	282.062	245.341	285.194	315.464	318.135	301.862	289.455	317.716	241.778	320.486	288.522	240.453	253.069	274.621	208.476	258.704	287.489	246.932	270.07	350.194	371.032	254.857	284.778	312.892	249.275	219.712	251.383	184.088	236.899	217.766	219.557	221.539
RP3300	omega-COOH-tetranor-LTE3	HMDB0062513	C15H16Cl3N3O2	71.0506	71.0506	398.021	149.508	153.673	75.6551	22.7592	174.946	143.628	89.6396	81.3584	147.001	37.6979	82.3408	182.588	191.108	63.5622	153.319	98.6856	72.1999	142.942	85.6482	70.9083	85.8402	24.0721	114.309	92.9044	158.332	129.511	168.684	160.308	135.635	138.353	159.261	126.835
RP3233	N-Hydroxy-1-aminonaphthalene	HMDB0062503	C10H9NO	109.663	109.663	198.031	85.7641	74.0751	99.5409	114.429	64.8131	89.1608	86.1686	94.204	72.0851	61.3236	76.3084	99.3969	59.945	60.6868	65.6672	85.7204	110.212	81.4883	94.7177	91.5723	91.6962	68.1124	104.561	91.3975	84.0422	68.1137	75.4084	53.3404	84.0108	75.8454	65.1171	56.4158
RP2324	Benzo[a]pyrene-7,8-dihydrodiol-9,10-oxide	HMDB0062470	C20H14O3	83.1499	83.1499	341.058	54.1388	43.4653	64.1971	61.387	74.8901	64.849	67.9994	63.4797	76.021	86.6492	74.0112	50.9406	49.0664	47.7469	60.0934	68.4845	71.6311	63.8222	71.8614	69.1674	71.7711	60.5074	61.8928	66.8252	79.9478	75.3602	71.2062	75.1785	91.2078	61.6715	64.1536	53.865
TN135	(2E)-Butenoyl-CoA	HMDB0062466	C25H40N7O17P3S	310.957	310.957	874.115	43.8761	48.0181	45.6174	46.2838	35.4619	42.2258	44.1316	40.1276	49.1967	46.4927	39.2849	43.476	10.3192	43.6992	39.8626	44.1829	32.7649	31.1723	39.5005	29.0628	23.9362	25.0685	21.7682	20.6165	24.6043	29.3932	28.3003	29.8119	22.9429	31.1856	20.4003	18.4256
RP1814	anhydroretinol	HMDB0062447	C20H28	759.296	759.296	269.226	124.373	4303.44	4430.31	4959.01	5774.04	10522.7	8095.62	5650.58	5797.58	10073.2	8503.73	12116.7	7150.51	12773.3	10120.2	17759.9	6098.59	3676.93	4464.08	7218.46	7917.27	8873.92	7332.34	4245.61	4449.5	7881.44	9696.77	5958.53	8759.32	6547.08	5165.89	6887.79
TN1291	alpha-[3-(Nitrosoamino)propyl]-3-pyridinemethanol	HMDB0062443	C9H13N3O2	259.524	259.524	234.064	17.3873	15.9875	13.0202	11.2841	13.4976	14.6874	13.8002	13.3236	16.8913	13.1644	14.7273	14.2297	9.39816	16.2869	16.1816	13.5972	15.1214	15.7437	18.2069	11.0267	17.7705	16.2569	18.1019	14.0537	17.5174	16.2056	15.0504	13.6678	14.1865	19.2478	15.1635	17.7232
RP686	8-hydroxy-5Z,9E,11Z,14Z-eicosatetraenoic acid	HMDB0062433	C20H32O3	779.77	779.77	338.268	1385.44	17127.7	5841.04	7174.39	6713.35	6389.38	6566.2	6131.33	7456.46	6229.58	5585.57	5128.21	7001.99	5810.04	5335.64	4693.42	2688.14	3151	3604.46	3979.02	3518.81	2988.89	1965.85	3637.99	2153.84	2839.51	2181	2017	1429.5	1291.48	1475.95	1896.4
RP2404	7-HETE	HMDB0062431	C20H32O3	737.839	737.839	321.242	139.688	586.62	277.347	477.031	488.146	584.261	557.99	572.842	568.054	567.105	401.471	378.876	388.289	583.897	388.311	354.928	354.48	446.805	459.68	650.8	474.254	523.141	373.519	379.551	549.801	455.739	408.896	489.12	308.321	354.025	359.112	374.902
TN2083	7,12-Dimethylbenz[a]anthracene	HMDB0062429	C20H16	743.596	743.596	239.123	34.8522	30.6843	29.2551	33.307	32.4806	25.1304	35.7733	32.5676	34.2446	30.9558	34.6128	30.613	24.281	30.2667	26.3047	29.5372	27.9252	28.984	31.1968	26.7003	27.4493	30.7083	27.7377	30.7158	27.0094	32.9771	35.7381	31.0988	34.601	30.6106	30.731	29.3305
TN1804	5-S-glutathionyl-L-DOPA	HMDB0062425	C19H26N4O10S	72.3014	72.3014	467.122	172.794	2747.88	2208.24	715.206	375.325	170.607	859.762	808.532	219.323	3169.44	2282.47	322.953	280.743	2821.43	1372.54	281.77	154.162	131.981	163.898	1931.61	630.61	2226.71	199.493	485.779	166.67	140.997	158.542	157.191	126.238	1044.19	193.441	1234.9
RP746	5,6-Epoxy-13-cis-retinoic acid	HMDB0062411	C20H28O3	794.609	794.609	334.235	185.67	215.324	227.005	194.772	182.56	212.162	224.217	188.247	196.823	107.541	157.457	194.728	202.044	113.953	97.1299	200.855	183.982	162.65	170.29	136.755	122.56	94.6509	136.889	138.315	103.173	58.642	136.363	39.175	52.2877	48.2327	57.849	51.8694
TN1310	5,12-dihydroxy-6,8,10,14-eicosatetraenoic acid	HMDB0062409	C20H32O4	784.901	784.901	337.236	145.589	57.6696	114.811	172.86	124.93	119.232	122.129	106.521	84.0404	54.8331	74.5251	64.7037	21.0149	50.288	46.8326	81.5872	92.3675	100.71	151.659	131.209	96.2248	77.2463	88.7293	100.163	88.404	192.195	143.95	74.6342	174.116	122.736	120.532	57.9068
RP1302	4α-hydroxymethyl-4β-methyl-5α-cholesta-8-en-3β-ol	HMDB0062391	C29H50O2	529.523	529.523	448.413	25.7022	21.6744	42.4022	42.0744	30.0477	39.4666	52.2847	41.9943	6.57863	7.81767	10.154	6.2384	5.07713	4.9034	6.00349	10.7825	42.6779	40.3671	33.3718	41.9408	44.6796	28.6928	40.6451	35.4134	7.29014	5.47037	5.69454	4.21819	3.67416	4.68046	4.78083	3.94261
RP1631	4α-hydroxymethyl-4β-methyl-5α-cholesta-8,24-dien-3β-ol	HMDB0062390	C29H48O2	392.958	392.958	446.398	337.372	293.736	394.771	372.112	418.7	303.986	317.925	399.782	33.6867	19.6142	29.8978	38.7688	36.4834	24.6932	31.0112	27.2735	382.421	533.023	472.953	416.435	474.143	375.727	304.184	381.02	35.3751	41.6597	31.8235	27.0303	24.8896	28.725	22.6117	21.136
RP1514	4α-formyl-5α-cholesta-8,24-dien-3β-ol	HMDB0062389	C28H44O2	375.868	375.868	430.364	205.274	196.495	224.35	202.179	335.55	204.401	218.654	224.243	27.0732	23.2378	40.8145	26.6968	32.5181	21.9014	17.3755	23.1228	211.543	313.029	275.83	253.146	252.396	231.205	158.884	199.448	49.0818	34.4163	22.7186	36.0747	63.8657	30.9195	22.5301	27.0691
RP3357	4α-carboxy-5α-cholesta-8-en-3β-ol	HMDB0062386	C28H46O3	564.504	564.504	469.31	401.117	192.972	348.3	324.346	373.991	360.167	396.302	319.121	184.086	153.614	125.93	195.219	211.281	128.974	132.445	178.167	399.513	362.384	506.477	514.205	435.399	243.806	424.293	372.564	187.689	177.141	246.94	138.221	176.275	159.202	156.108	149.835
RP418	4α-carboxy-4β-methyl-5α-cholesta-8-en-3β-ol	HMDB0062384	C29H48O3	857.001	857.001	483.327	4543.41	2481.14	5658.48	4540.02	4709.42	5911.23	6455.08	5315.6	5942.92	4584.76	3519.85	4548.7	5634.08	4230.37	4437.85	5433.84	7992.7	8305.29	10998.6	10505.5	9475.06	5870.6	7532.78	6819.96	7801.4	7356.72	9782.18	5049.26	6842.18	7423.07	7539.78	5340.02
RP263	(6E,8S,10Z)-8-hydroxy-3-oxohexadecadienoic acid	HMDB0062366	C16H26O4	876.946	876.946	321.147	7.29956	11.8435	11.1199	12.0558	13.9384	11.5896	14.3749	12.8274	11.8968	14.9239	10.9686	12.3556	10.8694	12.0983	11.8805	12.5014	160.55	183.713	202.907	239.65	206.136	203.597	188.64	225.882	164.223	164.823	215.69	195.995	135.903	150.857	168.078	170.011
TN615	(6R,8Z)-6-Hydroxy-3-oxotetradecenoic acid	HMDB0062363	C14H24O4	926.143	926.143	221.155	76.4752	68.0103	73.6118	77.1384	75.6059	87.6431	80.7924	81.1905	83.2577	76.4948	79.8544	80.5663	76.3171	73.5851	65.3822	58.9944	57.8937	54.3466	58.8597	52.9617	50.808	57.1878	64.4874	63.389	66.6613	62.2395	62.2644	64.1334	66.2697	66.4313	68.1202	67.1951
TN1336	N-Palmitoyl phenylalanine	HMDB0062339	C25H41NO3	1162.65	1162.65	426.303	1.32538	0.515398	11.7163	9.9039	6.68965	2.93101	5.55197	11.0638	14.7177	6.19815	12.5361	13.1416	3.32505	9.79735	10.4434	21.0894	6.13748	8.86068	15.2987	6.75463	10.619	5.52404	9.98151	4.55815	15.6494	19.6715	19.2501	4.5676	55.9948	33.0501	25.313	23.2916
RP1737	N-Oleoyl tyrosine	HMDB0062337	C27H43NO4	612.328	612.328	484.281	183.004	168.967	201.248	257.433	248.835	235.33	196.177	232.59	204.964	237.614	230.684	198.53	198.67	210.2	186.608	221.383	204.135	188.958	226.244	256.539	272.163	227.586	199.719	232.022	189.888	179.947	190.922	152.866	229.47	196.859	228.457	214.915
RP2622	N-Oleoyl GABA	HMDB0062335	C22H41NO3	596.58	596.58	406.274	54.3328	54.9593	77.9221	58.9115	62.5519	58.3051	88.3248	57.1422	93.1347	60.909	96.3674	46.7285	86.4976	90.88	50.1705	81.6663	67.5245	57.1662	55.6458	69.9487	75.3619	60.7993	48.5516	59.806	139.436	56.9845	58.7451	70.4913	343.527	124.64	63.9818	115.817
RP600	N-Linoleoyl GABA	HMDB0062334	C22H39NO3	808.558	808.558	388.278	119.378	190.022	170.847	142.903	189.242	138.922	142.391	96.4732	115.363	92.3572	105.197	71.3084	87.5242	90.5627	78.4398	113.238	47.7165	51.3462	69.1036	133.502	85.5242	67.5828	67.6504	63.4711	70.2876	62.4308	68.3728	45.7862	47.1083	63.622	41.4825	35.5875
RP673	N-Docosahexaenoyl phenylalanine	HMDB0062333	C31H41NO3	295.351	295.351	493.341	375.564	360.367	373.372	359.445	377.599	377.593	363.054	384.646	369.782	391.114	395.712	382.893	367.806	386.937	389.302	387.465	383.275	396.065	394.536	404.429	385.205	406.905	407.321	416.716	394.94	400.255	406.377	413.201	406.712	381.585	374.63	404.536
RP2407	N-Docosahexaenoyl GABA	HMDB0062332	C26H39NO3	667.214	667.214	436.281	1907.78	1148.73	2059.51	1695.11	1732.93	2048.53	1969.18	1790.17	1627.25	1343.21	1105.66	1414.01	1474.47	1263.99	1180.34	1461.35	1720.41	1841.22	2504.83	2657.06	2259.42	1522.41	2050.42	2021.96	1591.45	1549.38	1968.16	1012.14	1579.89	1387.4	1537.18	1292.37
RP1174	1-hexadecyl-glycero-3-phosphate	HMDB0062325	C19H41O6P	811.306	811.306	414.297	195.516	311.211	441.77	464.004	254.267	243.313	232.161	210.154	188.603	194.261	189.249	177.141	162.949	179.624	71.5398	75.9162	133.299	125.746	113.299	191.704	181.628	134.268	74.9472	115.359	101.108	153.658	97.3187	108.555	50.5685	317.805	229.349	262.134
TN368	1-(9Z-hexadecenoyl)-glycero-3-phosphate	HMDB0062323	C19H37O7P	1133.04	1133.04	373.215	4.93186	13.5566	5.0877	5.36836	4.79299	5.33041	4.48013	4.5469	4.05589	3.19593	3.05403	3.72081	1.98984	3.64635	11.7731	14.219	15.7772	13.7343	26.0745	19.5514	12.4472	9.97145	11.137	13.5458	17.0543	15.7386	17.6328	11.7792	16.3444	16.447	15.1806	13.8172
RP1185	1-(9Z,12Z,15Z-octadecatrienoyl)-glycero-3-phosphate	HMDB0062320	C21H37O7P	589.062	589.062	433.234	130.405	59.173	70.1074	68.7404	93.924	48.1527	138.847	65.9703	83.5838	50.3349	78.3677	87.3535	49.8836	65.5237	49.8774	120.3	110.669	179.662	115.272	105.996	117.03	75.4892	125.381	76.1598	160.469	114.178	108.814	104.632	144.144	72.5254	78.0523	95.816
TN1280	1-heptadecanoyl-glycero-3-phosphate	HMDB0062318	C20H41O7P	796.981	796.981	463.22	65.5468	42.537	45.9646	49.6068	57.067	31.3459	49.5968	34.6911	31.8262	47.7852	42.3763	38.7373	10.5739	52.1828	30.1892	46.2464	40.8643	40.4248	45.6884	42.7206	47.8566	41.1346	44.0506	47.6382	38.0514	78.4068	60.1615	57.7216	65.9674	66.237	74.6116	63.4584
RP2609	1-eicosanoyl-glycero-3-phosphate	HMDB0062315	C23H47O7P	306.231	306.231	484.341	168.436	170.515	158.615	148.721	150.484	153.493	163.365	170.161	163.704	165.613	161.986	165.362	164.662	174.216	157.586	153.051	174.935	169.991	45.486	160.242	163.359	167.09	175.678	181.406	36.539	57.4386	154.654	171.363	139.35	155.478	146.493	177.544
TN2387	1-(5Z,8Z,11Z,14Z-eicosatetraenoyl)-sn-glycero-3-phosphate	HMDB0062312	C23H39O7P	333.156	333.156	481.232	55.2024	61.4288	59.1431	52.8971	57.0064	54.9462	55.1239	57.6346	60.7829	48.2771	59.453	56.8001	32.3813	55.7353	57.2197	56.4432	59.0631	54.4085	56.1062	47.4249	57.0468	57.0276	57.3815	55.0678	55.6757	57.1395	53.2221	54.7648	56.7808	54.2851	58.3342	53.248
RP2310	1-(4Z,7Z,10Z,13Z,16Z,19Z-docosahexaenoyl)-glycero-3-phosphate	HMDB0062307	C25H39O7P	549.783	549.783	500.276	1380.66	782.101	2130.35	1844.44	1575.45	1040.03	1850.8	1384	1646.22	2856.59	1696.83	1598.55	1429.64	2333.34	1607.42	1966.25	1709.31	1387.36	1760.4	2737.16	2903.33	2118.57	1545.99	1508.82	2258.79	1934.51	2759.71	1275.52	1555.81	2914.68	2735.32	2345.68
RP428	1-(11Z-eicosenoyl)-glycero-3-phosphate	HMDB0062305	C23H45O7P	857.001	857.001	482.324	16644.4	9010.28	20690.8	16898.5	17340.8	21775.6	23613.5	19644	21469.2	16756.2	12782.6	16559.8	20687.9	15458.2	16029.9	19614	28678.6	30223.8	39578.4	38202.1	34513.2	21363.2	27119.1	24946.7	28157.6	26873.9	35164	18257.9	25242	27011.3	27310.1	19776.2
RP3228	1-(11Z-docosenoyl)-glycero-3-phosphate	HMDB0062304	C25H49O7P	707.731	707.731	515.31	333.315	290.39	305.589	315.407	330.054	315.965	331.835	336.903	357.231	335.76	354.189	363.088	371.745	385.653	364.045	398.763	360.299	252.065	373.465	327.985	314.437	375.298	349.117	357.508	331.833	354.142	384.528	309.832	327.818	347.983	363.858	357.723
RP301	12R-hydroxy-5Z,8Z,12Z-eicosatrienoic acid	HMDB0062290	C20H34O3	791.431	791.431	340.284	5938.33	558.914	8850.14	5387.28	6908.08	5657.9	5361.77	5865.51	6106.73	6778.71	5415.24	4902.55	5165.5	6131.26	5134.83	4879.18	2126.78	2677.96	3118.79	3198.53	3370.25	3256.41	2814.14	2057.12	2571.05	2310.74	2699.79	1619.16	1920.5	1364.16	1730.36	1669.66
TN791	12S-hydroxy-5E,8Z,10Z,14Z-eicosatetraenoic acid	HMDB0062287	C20H32O3	1163.44	1163.44	285.225	29.9667	27.5837	34.9172	26.7792	34.6973	46.4807	45.1134	34.7133	15.2601	25.5725	24.2853	30.4934	27.1828	27.0209	12.8366	10.3171	18.2115	29.328	24.3221	31.6849	28.5032	19.6035	25.7938	27.2276	19.4503	14.6705	11.5941	12.3389	9.87291	9.88144	7.57159	8.0447
RP1541	11-trans-LTE4	HMDB0062286	C23H37NO5S	621.066	621.066	462.224	194.908	159.178	226.081	225.855	230.724	191.555	199.849	195.944	185.083	213.78	182.898	182.292	168.901	161.409	132.923	149.138	173.169	178.415	183.25	214.238	210.869	171.702	180.212	170.317	181.636	176.695	172.081	148.859	180.771	180.782	182.307	183.12
RP933	(4Z,7Z,9E,13Z,16Z,19Z)-11-Hydroperoxydocosahexaenoic acid	HMDB0062285	C22H32O4	579.574	579.574	378.263	56.7362	67.0216	135.046	81.3987	108.704	51.1039	64.8456	100.128	74.5225	103.981	92.5343	108.518	59.9487	49.5049	119.851	148.627	119.403	102.165	140.277	153.368	233.44	173.144	108.824	106.074	176.952	197.985	170.139	151.92	130.837	137.637	166.38	160.606
TN639	11-Hydroxy-E4-neuroprostane	HMDB0062284	C22H32O5	1141.66	1141.66	359.222	53.0703	35.4271	56.3716	53.5022	54.4083	53.0109	56.914	52.2421	52.4544	53.5739	64.2394	47.4223	20.2288	61.2273	44.9276	51.1983	45.849	53.0183	51.3	50.6375	35.0709	27.4918	37.7219	41.8846	40.3994	37.4697	52.107	27.5282	39.3244	48.1297	34.3546	31.0484
TN1255	10-Hydroxy-E4-neuroprostane	HMDB0062276	C22H32O5	1141.28	1141.28	341.213	107.443	18.7398	96.9287	94.6079	86.8454	100.459	100.413	92.3003	96.5059	75.7102	99.679	91.9356	34.7419	114.471	88.3614	90.4273	83.681	83.3398	112.597	106.174	78.2658	63.7519	71.1802	67.754	98.931	78.3497	86.3534	69.3092	88.17	87.1921	58.8219	74.0132
TN139	1,2-Diacylglycerol-LD-PS-pool	HMDB0062271	CCl3NO2	1236.07	1236.07	127.884	4.97904	5.95934	5.05607	5.59273	6.44055	5.47693	5.39492	5.31878	4.68327	3.44785	5.83727	4.98327	5.93214	5.62725	6.22349	7.30402	7.58483	7.71998	7.12927	7.37161	7.22687	7.33849	7.02737	8.45532	8.70152	8.29015	7.79182	8.61975	7.45679	8.52717	8.7181	5.23933
RP1398	1,2-Diacylglycerol-LD-PI-pool	HMDB0062270	C7H5NO	364.16	364.16	120.044	162.995	25.38	27.6838	48.346	36.8972	68.3648	69.7055	52.2585	73.8824	21.0561	53.7983	91.1474	28.6278	32.5803	31.6403	36.379	73.434	231.603	202.259	70.6183	49.3761	45.4842	128.531	85.5182	111.298	127.187	111.771	114.944	132.305	56.8264	45.7922	45.1069
RP1159	5S,6S-epoxy-15R-hydroxy-ETE	HMDB0062236	C9H20O5	786.431	786.431	226.17	57.3375	89.1263	70.4175	67.3942	67.0962	81.31	63.9612	64.78	61.2961	65.7301	62.0256	59.8035	58.819	66.0971	57.0658	57.3648	48.6445	49.3537	58.1517	78.0339	70.0333	66.7004	62.0295	62.9915	65.7297	59.7498	48.5598	56.2019	39.1914	50.4199	32.8358	58.165
RP185	18R-hydroxy-5Z,8Z,11Z,14Z,16E-eicosapentaenoic acid	HMDB0062222	C20H30O3	779.575	779.575	336.252	139.748	633.728	505.408	659.254	595.115	571.701	596.993	580.731	692.677	568.257	510.861	486.564	641.108	585.473	554.545	473.729	283.393	312.296	364.661	409.092	343.071	302.197	201.702	319.54	238.243	284.798	200.678	216.738	154.492	144.092	146.344	183.763
RP3313	3alpha,7alpha,24(S)-trihydroxy-5beta-cholestan-27-al	HMDB0062208	C27H46O4	471.586	471.586	457.33	44.4647	21.3674	51.6943	98.4871	49.2336	59.5745	39.3779	57.1809	188.847	94.5924	318.388	77.5802	234.236	93.8328	226.768	281.697	154.785	70.1263	203.171	170.111	201.85	164.534	78.413	146.96	160.585	65.2476	57.5375	95.0016	89.0133	43.5692	41.2294	51.0963
RP1971	2-S-glutathionyl acetate	HMDB0062198	C12H19N3O8S	126.067	126.067	366.097	125.354	54.0205	126.77	102.092	99.6822	88.7962	52.4034	69.053	63.1904	35.0668	69.0386	121.953	128.85	116.369	118.317	113.102	96.842	61.7254	128.143	49.0052	134.334	58.4355	141.981	128.058	120.102	60.4035	74.5102	89.2692	123.92	167.217	174.001	124.05
RP603	2-acetyl-1-alkyl-sn-glycero-3-phosphocholine	HMDB0062195	C26H54NO7P	649.922	649.922	562.328	63.1263	606.312	268.06	616.177	541.302	608.789	628.293	526.195	520.683	470.58	456.195	409.354	491.934	450.309	282.554	409.533	122.523	93.4895	124.89	138.578	117.542	100.4	82.4687	110.905	87.1776	74.8825	101.912	96.0128	102.179	87.831	89.3935	98.4364
TN377	2,2-dichloro-1,1-ethanediol	HMDB0062193	C2H4Cl2O2	1241.1	1241.1	130.966	226.838	195.183	176.46	176.734	182.714	184.833	201.342	186.986	179.158	178.681	209.14	211.524	248.133	217.826	229.044	230.206	230.326	269.259	259.082	262.362	269.492	284.562	236.15	271.57	272.385	279.892	228.55	281.207	293.872	263.238	269.295	174.298
RP1501	N-lactoyl-Methionine	HMDB0062182	C8H15NO4S	223.549	223.549	222.079	225.546	283.653	195.135	180.296	129.138	102.364	115.76	88.9795	190.145	109.136	274.624	307.272	247.264	205.896	156.828	180.163	140.475	173.751	183.664	119.707	184.379	154.281	320.198	203.339	188.518	144.615	161.415	120.07	365.504	361.679	401.284	259.673
TN1555	N-lactoyl-Tyrosine	HMDB0062177	C12H15NO5	424.504	424.504	236.093	204.338	243.772	274.347	263.263	222.178	164.882	217.309	211.386	246.237	329.792	316.392	233.685	60.5401	273.455	296.795	271.876	209.698	158.22	118.156	255.295	302.566	329.912	273.562	260.188	278.564	259.811	232.438	275.14	237.8	594.406	368.167	434.984
TN1748	3,5-Bis(1,1-dimethylethyl)-4-hydroxy-benzoic acid ethyl ester	HMDB0061935	C16H24O3	969.724	969.724	247.17	68.4908	30.469	37.4067	33.1918	40.5301	43.5512	41.7015	40.9179	22.3198	10.5648	34.1251	40.254	10.6726	17.8001	13.4928	27.548	34.3063	35.4263	40.2062	30.0716	20.7425	12.4967	40.867	27.5424	29.9008	13.4598	34.9244	9.72105	15.3975	7.79288	8.79003	8.04276
RP246	Thiocarbamic acid	HMDB0061934	CH3NS2	862.948	862.948	131.929	49.6985	54.1856	45.4439	46.9084	45.076	47.0199	44.0712	50.5947	44.4694	50.0984	53.0711	54.0963	50.062	47.8718	51.662	53.5407	43.9328	39.382	37.1969	33.2332	40.0317	41.4435	40.769	37.9843	43.1669	36.1749	31.6715	39.0944	38.1845	37.4656	36.4248	38.5513
RP870	1,3-Dihydro-(2H)-indol-2-one	HMDB0061918	C8H7NO	118.014	118.014	172.017	144.706	138.748	105.242	117.88	206.807	209.971	161.77	177.151	177.623	128.71	158.49	144.67	141.045	89.2761	100.126	93.8947	199.118	226.61	219.425	152.5	215.468	151.245	196.196	180.677	248.543	232.148	232.006	185.712	255.93	179.634	184.149	175.48
RP2604	(Z)-1,3-Octadiene	HMDB0061897	C8H12	384.953	384.953	109.101	69.1428	96.7921	61.0184	107.034	86.5775	95.6269	73.1713	66.1202	139.357	138.182	147.014	195.953	128.371	146.458	122.584	145.071	76.6754	38.3954	62.4605	72.2022	78.4266	98.0205	48.2156	58.8895	130.633	119.514	95.3414	152.133	209.45	167.469	139.179	104.182
RP2864	N-Acetyl-beta-alanine	HMDB0061880	C5H9NO3	76.0648	76.0648	114.06	46.2006	21.3692	21.2064	27.034	38.6755	49.1538	29.0657	31.0015	25.583	20.2809	33.2311	44.2254	18.7653	22.1986	25.4246	29.8334	47.3566	45.4168	65.7223	23.2795	21.2884	26.3704	30.116	38.0167	27.2902	22.3176	31.8523	43.0278	68.0639	25.633	23.7244	21.1049
TN638	4-Amino-3-hydroxybutyrate	HMDB0061877	C4H9NO3	70.6184	70.6184	102.057	107.503	52.2302	91.4311	99.7474	83.5182	76.7873	118.516	120.743	147.756	96.9627	123.875	119.272	76.2509	108.868	119.744	154.328	162.953	136.108	180.483	107.167	156.099	98.4191	124.907	132.705	146.629	194.742	177.951	151.412	166.767	176.398	140.115	164.502
RP1267	2-Acetyl-3,5,5,6,8,8-hexamethyl-5,6,7,8- tetrahydronaphthalene	HMDB0061860	C18H26O	696.249	696.249	259.205	27.179	74.288	77.1863	75.0226	91.9398	158.155	98.1001	84.5473	51.9336	382.3	330.849	357.022	384.509	342.982	423.159	261.663	574.717	153.859	79.8008	163.028	164.502	245.645	327.375	118.159	179.733	575.465	405.676	374.97	464.388	770.517	619.543	442.282
RP256	(-)-alpha-Curcumene	HMDB0061838	C15H22	646.765	646.765	203.179	9.32645	135.562	80.2732	112.134	102.973	128.875	123.881	103.652	117.595	79.0114	97.6469	112.173	116.437	52.4695	75.4728	66.8757	18.5251	22.9016	30.6197	25.051	25.3306	14.9229	17.7735	29.4587	24.6607	16.8438	19.0983	17.5202	19.7801	18.1768	20.394	17.1613
RP830	1-Acetyl-2-methylcyclopentene	HMDB0061832	C14H24	761.951	761.951	215.178	17.6402	49.7168	33.9317	53.0734	57.1382	91.7858	61.093	43.1369	55.1211	68.1153	79.0034	82.9868	68.3868	68.3428	67.7846	106.378	30.2334	27.9952	33.2505	40.8516	49.4785	52.228	34.7928	36.1482	31.9547	46.0834	47.2637	36.5201	49.698	42.0273	35.2559	38.448
RP2606	1-Phenylheptane	HMDB0061825	C13H20	515.263	515.263	159.156	28.907	29.3532	30.4029	28.4758	28.8382	27.7947	30.3136	29.9483	28.1934	28.5997	32.2304	29.7751	28.7653	30.4437	30.9143	26.854	28.3182	28.0588	31.8907	30.3357	30.265	31.0054	32.3591	30.6701	27.5002	29.0772	26.2936	31.1647	27.0869	28.4514	29.2111	30.6164
RP1238	1-(1-methylethenyl)-3-(1-methylethyl)-benzene	HMDB0061814	C12H16	79.5643	79.5643	161.132	154.406	165.265	161.975	156.536	120.132	133.072	139.093	170.122	248.489	238.476	200.521	222.328	227.922	174.138	274.598	136.811	91.4441	97.9639	80.755	80.3213	50.2409	79.2969	104.578	70.7389	149.222	206.376	140.683	226.396	123.718	161.831	115.39	167.816
RP201	1-(3-Methylbutyl)-cyclopentene	HMDB0061800	C10H18	648.333	648.333	161.131	18.1309	115.386	66.2905	96.4912	84.016	104.445	109.749	87.8793	106.938	73.2265	84.0575	90.3874	88.7211	52.3437	61.3284	55.4621	19.225	16.0315	18.9812	14.3148	15.1609	16.6603	12.1051	18.0464	17.4489	13.3337	13.3196	14.9218	11.7476	12.6263	14.603	10.8066
RP1515	3-Allyl-1-cyclohexene	HMDB0061784	C9H14	68.23	68.23	105.109	220.022	145.616	209.269	212.531	216.901	218.254	217.74	223.051	190.498	158.986	172.729	160.871	179.755	139.172	159.478	194.406	236.953	290.621	262.903	296.466	239.849	198.854	259.557	251.39	240.31	238.994	281.786	165.855	198.527	237.796	262.78	262.529
TN968	Mono-(3-carboxypropyl) phthalate	HMDB0061748	C12H12O6	133.019	133.019	275.053	67.3875	42.058	58.2478	38.4964	88.7788	23.9968	89.3281	34.6997	64.919	47.7248	83.7438	32.7488	33.8932	52.3509	86.6434	41.4037	88.1395	48.7341	106.746	130.423	129.598	96.9103	112.515	87.5413	42.3722	68.2425	52.5778	87.0277	113.866	63.1383	90.8755	72.4306
TN2462	2-(N-Ethyl-perfluorooctane sulfanamido) acetic acid	HMDB0061741	C12H8F17NO4S	162.652	162.652	607.971	33.9429	15.8477	28.8254	15.9105	34.1718	21.593	31.062	16.8488	39.3833	16.2318	39.3454	23.51	25.7482	21.6099	38.0631	23.6096	27.2448	35.5274	41.293	22.4804	31.7299	15.4357	36.1427	19.4077	28.5639	45.5939	33.426	38.8732	29.0375	19.6182	25.9782	16.5758
RP3266	Perfluorooctane sulfonamide	HMDB0061740	C8H2F17NO2S	68.8421	68.8421	499.963	19.521	21.4634	19.7672	22.3383	25.5353	24.9256	30.7976	22.313	43.7462	16.9579	21.2847	17.6217	25.6454	10.7799	41.8175	35.6319	24.8123	28.5541	29.893	19.8409	20.1476	12.7985	33.8974	21.2703	20.2791	24.9553	32.2112	25.4021	46.4379	20.5532	22.3344	17.8879
RP2521	Perfluorononanoic acid	HMDB0061739	C9HF17O2	70.0761	70.0761	446.97	37.692	25.9945	20.4719	18.1105	40.2209	45.8312	24.8707	22.865	25.6344	9.5709	19.5047	35.0053	21.8243	16.4122	30.7173	25.744	28.1732	50.79	40.8264	16.994	22.8788	9.05732	27.9042	28.0276	36.0455	32.721	30.7372	30.626	44.292	23.4123	24.506	18.2614
RP2869	Temocapril	HMDB0061720	C23H28N2O5S2	80.4291	80.4291	515.105	19.228	173.606	96.7937	65.3791	26.5061	26.3876	54.1046	51.1199	23.8525	149.001	127.386	31.2039	30.3258	211.017	57.4473	29.4505	18.6105	18.1387	16.3185	93.822	33.1958	337.93	29.5372	47.3938	35.5442	22.4063	16.4565	20.6777	23.7461	45.7361	38.1091	62.8508
TN432	3-Methylthiofentanyl	HMDB0061718	C21H28N2OS	969.77	969.77	379.182	10.7438	6.74792	8.44477	8.05315	6.57746	7.9991	6.55159	7.17309	4.28938	5.1061	3.96803	5.20941	2.8722	3.52361	3.25719	5.5973	49.7442	57.588	6.86398	14.1955	11.1691	9.60551	3.81093	6.55951	65.8177	70.4786	60.3892	58.8931	48.5518	52.5833	55.8986	14.6123
RP960	N-methylvaline	HMDB0061716	C6H13NO2	154.839	154.839	154.083	85.5801	76.9391	96.4106	99.1861	83.6875	76.0627	78.8065	85.8019	95.0913	124.494	133.683	114.614	106.025	87.5524	96.3566	103.065	95.1591	102.187	113.737	145.628	160.533	143.995	131.389	118.261	109.638	107.795	134.769	144.186	144.516	178.136	162.529	129.012
RP1326	Docosadienoate (22:2n6)	HMDB0061714	C22H40O2	742.49	742.49	354.341	3590.75	3715.64	3578.49	3683.42	3873.69	2281.36	758.732	565.807	527.62	640.333	613.821	585.817	610.8	659.484	712.284	683.727	506.444	508.627	579.365	526.721	558.491	543.893	647.15	79.9321	499.657	495.724	524.048	418.818	498.814	420.889	500.136	501.022
TN563	2-Stearoylglycerophosphoinositol	HMDB0061704	C27H53O12P	900.927	900.927	601.331	3.37421	90.9122	70.9856	66.2047	59.7602	53.7771	56.7813	60.7004	59.4959	66.2659	77.7573	88.2086	91.4869	56.8607	144.7	115.501	652.457	295.138	932.559	285.945	305.379	289.169	247.115	342.05	231.224	227.757	271.046	255.583	223.039	206.495	297.101	223.465
RP16	LysoPC(0:0/18:1(9Z))	HMDB0061701	C26H52NO7P	745.481	745.481	544.337	13757.2	11335.1	19305.5	18535	18573.7	18784.1	19315.9	18778	16406	15326.7	14599	13289.2	15783.3	13374.6	13858.1	12313	5401.21	7049.47	7753.93	9521.88	9090.4	6105.48	6140.04	7904.62	3549.07	4623.78	4143.27	2022.8	2641.4	2213.43	2450.87	2614.71
RP585	LysoPC(0:0/20:4(5Z,8Z,11Z,14Z))	HMDB0061699	C28H50NO7P	631.431	631.431	582.301	262.537	303.905	315.526	283.384	326.567	275.614	310.14	261.783	232.613	268.083	225.172	223.147	218.132	256.861	221.391	213.119	220.807	204.348	236.728	278.367	276.639	217.243	202.538	256.731	211.083	187.444	177.975	160.564	197.304	208.078	228.878	202.127
TN961	1-Stearoylglycerophosphoserine	HMDB0061698	C24H48NO9P	981.209	981.209	548.297	174.511	106.3	218.917	183.928	190.351	245.62	183.222	215.577	237.305	145.592	166.071	148.736	61.6791	144.305	168.732	117.976	121.317	127.583	197.318	154.934	115.941	137.73	133.198	113.521	116.007	141.745	158.236	110.439	148.691	150.911	144.132	112.136
RP669	1-Stearoylglycerophosphoglycerol	HMDB0061697	C24H49O9P	712	712	535.298	185.468	261.686	171.286	165.684	176.57	202.757	169.673	190.931	213.74	209.566	197.744	194.572	189.973	161.161	171.792	172.243	134.174	155.964	151.844	153.221	141.918	148.386	170.221	143.037	152.809	159.224	144.052	131.027	139.053	122.697	121.878	127.936
RP69	1-Palmitoylglycerophosphoinositol	HMDB0061695	C25H49O12P	900.778	900.778	595.283	110.07	22.3996	178.405	86.6482	179.532	193.055	254.795	196.873	218.954	151.926	129.261	164.702	146.685	149.783	175.833	191.131	29.7552	39.2494	27.1508	27.4449	23.6407	14.787	15.3861	15.2285	11.5137	10.5111	10.1496	9.47583	6.28721	10.3042	7.54121	7.311
TN2689	1-Oleoylglycerophosphoinositol	HMDB0061693	C27H51O12P	863.171	863.171	621.298	148.707	122.892	146.442	129.945	100.809	44.515	128.577	36.5316	377.95	109.736	517.51	370.666	101.124	336.873	439.112	409.285	228.655	254.815	389.49	301.607	298.96	239.913	256.451	251.858	195.898	429.097	268.03	331.833	527.272	416.428	245.206	265.387
RP9	1-Arachidonoylglycerophosphoinositol	HMDB0061690	C29H49O12P	721.412	721.412	603.292	548.69	569.877	639.22	670.842	648.806	711.892	658.635	709.726	840.749	570.141	745.837	631.379	591.447	538.838	674.04	622.79	117.418	119.115	89.743	57.6334	61.8993	52.8381	66.0396	48.2143	61.1495	53.562	39.5114	37.5447	49.9251	36.6812	31.9355	30.5564
TN689	2(R)-hydroxydocosanoic acid	HMDB0061660	C22H44O3	1028.17	1028.17	395.293	1.19216	0.51633	3.0102	1.38319	2.58263	3.23292	3.6906	1.36282	7.75024	4.08941	12.5697	6.03891	5.04369	7.29406	10.0481	9.32888	7.12281	9.21796	28.2025	5.71759	11.6537	10.9773	14.5814	12.4869	13.1926	14.4187	10.5094	7.44268	50.4657	30.2195	25.6829	22.6304
RP630	3-hydroxyheptanoic acid	HMDB0061653	C7H14O3	66.3325	66.3325	129.094	25.2955	24.6166	32.1121	28.4099	32.471	27.704	31.8024	31.0881	33.054	38.4929	34.9238	30.5459	37.6016	32.5244	39.3897	34.5056	31.3992	35.8071	35.2249	37.494	37.9709	37.8444	40.3471	39.2144	41.8697	41.5208	40.411	40.8845	35.9613	48.7665	45.7331	45.706
RP357	3-hydroxypristanic acid	HMDB0061651	C19H38O3	675.446	675.446	337.272	399.304	190.154	300.966	350.772	270.45	207.249	277.152	246.367	162.331	169.811	138.098	238.59	196.927	171.36	138.646	174.114	95.6939	74.3464	53.5925	55.8482	42.9265	77.9339	65.6523	44.7971	43.2379	48.4753	36.2605	44.3162	42.6558	36.8375	41.5323	44.3634
RP1841	9,10-epoxyoctadecanoic acid	HMDB0061650	C18H34O3	791.096	791.096	299.258	133.937	22.0979	167.903	115.818	153.454	122.151	117.861	130.908	112.944	156.31	86.8191	93.0565	108.851	130.428	97.9505	90.1721	91.7808	113.613	122.596	132.765	134.028	122.3	108.097	80.604	99.88	102.64	111.757	84.1425	116.842	91.4995	84.3279	79.979
RP995	3-carboxy-4-methyl-5-pentyl-2-furanpropanoic acid	HMDB0061643	C14H20O5	633.943	633.943	251.13	189.27	211.608	163.521	148.238	189.967	193.92	187.161	174.91	197.292	163.282	163.78	196.212	166.511	177.771	184.043	170.424	142.076	161.01	147.643	128.657	121.506	156.428	151.008	173.011	135.264	136.204	130.468	155.683	125.235	124.821	134.527	137.045
TN754	3-hydroxytridecanoyl carnitine	HMDB0061639	C20H39NO5	1126.49	1126.49	338.27	33.8063	179.755	106.59	143.616	110.764	108.523	127.155	125.507	127.326	102.168	41.6238	50.2378	13.9629	38.3148	35.3949	36.5992	25.2759	36.1666	56.13	16.0381	20.0773	13.6507	16.9996	18.8934	24.6813	44.2155	36.374	23.1711	93.6067	44.1033	36.0799	34.8138
TN1418	3-hydroxydodecanoyl carnitine	HMDB0061638	C19H37NO5	1041.76	1041.76	324.255	0.625247	0.709339	4.21985	1.349	1.93526	7.68367	14.96	0.771153	4.10867	3.01955	7.4209	118.268	181.362	69.2131	127.488	7.75953	23.664	25.286	24.0378	29.1387	43.7965	17.6198	22.6653	24.91	11.2102	7.07583	13.574	3.22778	31.5175	19.8365	13.7161	16.8102
RP119	3-hydroxyundecanoyl carnitine	HMDB0061637	C18H35NO5	647.733	647.733	346.262	13.2421	253.794	140.486	189.961	184.744	206.064	203.249	175.745	192.194	165.676	170.57	184.809	203.017	103.057	160.043	145.392	18.373	26.0213	24.8681	19.8431	20.3354	23.2936	13.4957	38.9377	13.3386	17.7864	8.05169	25.6784	13.9456	15.0348	7.32944	7.73548
TN16	3-hydroxydecanoyl carnitine	HMDB0061636	C17H33NO5	1078.97	1078.97	296.231	31.2534	44.7043	49.2686	54.3213	45.4634	36.4224	30.1436	61.2955	30.7921	21.2024	23.9493	31.1271	35.2482	25.5051	41.3941	18.0248	4.75736	8.5751	12.6232	9.44379	8.4215	7.27864	4.29896	2.98016	2.82288	3.05993	3.35629	3.29965	4.32172	4.00992	2.05835	1.13075
RP1653	PS(DiMe(13,5)/DiMe(11,5))	HMDB0061571	C52H90NO12P	642.674	642.674	974.61	15.1431	11.2473	22.2222	25.4939	3.85617	23.9691	17.6491	11.3897	15.2968	11.9974	7.79912	16.9791	16.6143	15.396	22.0202	17.3604	38.4512	15.1633	27.1124	25.8164	25.8476	18.4473	20.1344	14.3507	14.4733	32.3782	47.3458	14.5979	22.242	19.5823	26.5787	9.99062
RP2341	PE(DiMe(9,3)/DiMe(9,3))	HMDB0061501	C41H70NO10P	327.203	327.203	750.467	40.5391	41.0655	47.9986	55.2117	48.4209	43.3766	46.8251	49.3464	59.159	50.0169	61.961	48.6589	53.4737	54.1949	59.7242	53.0288	51.4209	45.5685	49.7421	54.9632	70.0645	65.2931	53.4405	48.6648	52.1635	63.2715	61.4932	49.1395	46.6925	61.5841	56.8544	48.0462
TN172	PC(DiMe(9,5)/DiMe(9,3))	HMDB0061429	C46H81NO10P	402.425	402.425	838.565	35.1001	34.5441	30.7669	32.3324	31.4926	29.6045	29.5059	28.4234	27.4684	29.6346	31.3577	26.6189	34.2784	31.6004	30.6291	31.3759	29.3352	31.0135	28.3339	28.6992	28.4975	26.4498	28.2415	24.7518	22.8894	26.6448	28.2302	26.1729	23.4798	26.8396	23.7962	23.6267
TN896	PC(DiMe(13,5)/MonoMe(13,5))	HMDB0061415	C55H99NO10P	64.2517	64.2517	986.685	8.94719	8.43752	3.9022	11.1717	8.07189	11.4792	7.38314	7.94709	8.28801	4.19971	8.62802	10.325	6.59337	6.99825	8.00471	9.03879	7.03903	7.82429	6.92874	6.23688	7.80398	6.30875	5.10066	7.89848	6.37459	4.94012	9.22712	8.15838	5.66429	9.20925	3.06818	3.77666
TN1219	PC(DiMe(11,5)/MonoMe(13,5))	HMDB0061406	C53H95NO10P	877.928	877.928	974.639	14.4008	17.8236	35.7071	9.31162	7.74687	25.5433	17.8205	10.9677	2.30984	12.1756	4.80603	5.24314	1.92651	10.1167	7.16125	11.8533	16.2171	10.2715	15.2804	14.7714	13.197	15.5603	14.5542	10.4315	6.73808	5.55144	12.0876	9.69724	7.338	9.50095	11.9461	9.84001
RP828	PC(DiMe(11,3)/DiMe(13,5))	HMDB0061392	C52H93NO10P	697.258	697.258	960.614	553.514	172.249	655.705	426.122	438.826	612.733	491.506	501.82	240.973	224.131	120.942	209.689	267.561	185.98	170.242	236.414	254.528	281.782	305.727	372.85	331.473	124.89	183.35	211.741	92.3619	105.559	133.584	66.0131	87.9148	86.4785	113.983	65.3899
RP1215	N,N,O-Tridesmethylvenlafaxine	HMDB0061345	C14H21NO2	246.011	246.011	218.157	20.6376	21.9109	24.7394	21.6866	22.8602	20.4962	25.2097	19.8266	24.1466	23.6707	26.8119	23.2099	23.3229	23.7839	23.069	26.2929	24.3749	24.4289	27.2052	29.195	28.5404	27.9372	25.2338	25.535	26.2083	25.7692	25.978	23.3214	27.1945	29.3239	28.5941	25.7233
RP2301	Norfluoxetine glucuronide	HMDB0061170	C22H24F3NO7	75.6514	75.6514	510.114	30.8011	123.178	139.202	129.027	53.8633	41.7097	150.508	103.741	107.405	192.294	152.918	43.7592	61.5454	116.979	66.6295	44.1474	35.2007	27.3414	20.4282	104.863	68.3811	172.404	35.7517	52.3816	73.759	34.9437	40.5049	102.923	37.2004	105.823	82.8405	94.0084
TN879	N2-Monodes-methylnizatidine	HMDB0061168	C11H19N5O2S2	75.4198	75.4198	356.061	25.0468	36.2813	26.8215	38.3915	28.45	38.8903	27.091	35.7424	31.3319	38.6776	28.5507	36.6912	40.3776	37.5584	30.6565	31.2218	34.324	36.3397	31.4204	40.4679	34.0168	48.13	35.9584	40.302	42.3663	30.7867	46.9182	33.6574	48.7202	50.5525	37.5239	56.3876
RP2049	N,N-Didemethyl orphenadrine	HMDB0061165	C16H19NO	446.024	446.024	264.136	57.0706	55.7256	42.8514	67.7717	43.8941	34.3428	50.6528	42.8362	71.208	35.3878	92.9853	40.331	72.8948	52.5974	45.6467	69.8121	53.0672	27.7034	59.8631	61.7342	56.7133	43.5692	42.9763	49.0366	84.8631	34.212	34.923	65.9877	63.3978	41.5861	25.8455	28.4683
RP1127	N-Desalkyl flurazepam	HMDB0061161	C15H10ClFN2O	565.059	565.059	327.012	99.6939	89.0148	96.9269	88.5218	87.8718	85.4637	84.0299	76.9931	80.1734	76.2807	80.5405	77.6529	71.0675	74.8935	70.7074	72.8381	70.8199	71.8025	72.747	69.3152	67.1292	76.916	69.785	71.4751	71.2657	64.2585	78.3131	72.3944	82.8491	71.247	71.7911	63.8089
TN1134	Lorcaserin sulfamate	HMDB0061153	C11H14ClNO3S	331.891	331.891	258.036	33.0995	21.2133	25.3704	32.7598	27.0466	17.153	23.9803	32.5282	30.5917	20.7918	23.4476	32.1515	7.91254	23.5927	18.4105	25.5482	18.3635	16.6607	15.2047	22.8252	17.7543	19.2734	14.7809	13.2439	17.1931	20.3223	25.8267	23.692	31.3278	29.7185	23.4199	29.336
TN1851	Hydroxylated N-acetyl desmethyl frovatriptan	HMDB0061151	C15H19N3O3	293.638	293.638	312.132	84.9302	64.4558	104.798	102.358	50.7924	36.4367	51.8022	44.3002	72.1256	107.407	94.1467	36.6795	55.8877	86.5	82.597	45.5655	76.9816	40.8527	63.8088	105.538	93.7174	97.9512	99.0983	90.6957	60.1732	99.9212	80.9574	87.8093	71.9617	100.796	92.6923	91.4271
TN2014	Hydroxyfluoroprednisolone butyrate	HMDB0061149	C25H33FO7	471.584	471.584	447.22	18.3924	26.1603	11.196	26.7808	26.5293	20.5691	13.3643	12.6599	15.7907	27.1001	20.4121	33.0788	5.90272	25.7391	14.9007	22.0852	12.8074	4.82529	15.5101	16.4703	23.2178	20.783	6.98476	10.3164	22.4483	28.2716	20.0743	27.2067	57.4546	18.01	13.7647	14.5928
RP1195	Doxepin N-oxide glucuronide	HMDB0061139	C25H30NO8	256.669	256.669	494.182	37.8656	49.2785	42.7633	88.2167	63.2204	67.5755	66.4786	53.0386	97.6177	90.58	126.648	131.58	101.524	91.7899	69.6194	84.5581	94.1759	24.9024	88.0449	76.3461	86.9859	116.327	48.7051	82.2243	112.57	85.085	89.3161	112.073	172.94	162.732	159.967	112.874
TN518	Clofazimine glucuronide	HMDB0061133	C33H30Cl2N4O7	273.624	273.624	687.142	43.6834	60.7461	96.7481	65.2736	72.8338	39.3202	61.7922	58.835	43.3187	70.6388	36.9097	32.373	6.2341	39.1606	22.3519	32.5139	18.4846	23.1691	21.7692	62.0573	33.062	28.9104	27.5821	26.0601	19.4467	19.0976	19.6272	19.38	18.0207	24.2164	14.0214	18.5762
TN801	4-Hydroxytamoxifen-O-glucuronide	HMDB0061125	C32H37NO8	838.949	838.949	586.235	83.2665	61.8642	68.8058	73.3352	65.3654	72.4067	71.8378	78.1263	85.999	52.6758	66.1261	80.6678	27.3468	59.8984	47.3984	53.335	39.4873	57.923	44.2912	30.9777	36.9263	37.3412	66.1915	30.5641	53.738	45.0579	52.3678	41.2797	78.4857	25.9053	46.6478	44.7299
TN228	5-Hydroxybuspirone	HMDB0061109	C21H31N5O3	1123.86	1123.86	366.229	56.3825	43.103	62.9889	53.3832	52.6016	55.6237	62.8574	64.9304	51.1173	38.3156	24.5897	55.5402	7.16104	22.6811	13.4217	21.2098	20.2281	21.235	25.9537	24.6185	17.8166	12.919	24.4827	17.5178	14.319	7.07409	12.6373	3.58509	8.15265	6.42468	4.68883	6.2193
TN2431	lamotrigine-2-N-glucuronide	HMDB0061103	C15H16Cl2N5O6	99.533	99.533	414.038	114.663	134.766	100.625	77.5748	96.1161	72.3312	161.408	71.2529	125.18	51.6717	174.056	81.4032	19.2809	66.9316	151.323	80.9667	89.3712	61.7983	60.9927	137.262	105.325	131.504	82.2317	82.0947	65.8805	91.4012	73.8743	93.4846	182.097	70.3619	101.961	95.2392
TN2030	3-oxobrimonidine	HMDB0061102	C11H12BrN5O	129.699	129.699	310.031	233.524	251.233	179.74	396.918	161.187	245.039	153.748	292.207	244.035	293.851	176.926	326.099	247.582	374.742	148.818	294.946	164.674	226.705	103.717	285.345	169.711	229.742	186.096	187.067	299.225	152.73	317.992	198.281	258.706	288.904	141.078	235.137
TN805	5-hydroxy saxagliptin	HMDB0061099	C18H25N3O3	823.288	823.288	354.177	38.444	5.86123	7.22887	3.9681	4.88117	5.4012	30.9336	5.17874	9.05923	6.36649	34.9665	48.368	4.14444	35.3218	29.0651	51.6287	28.4382	48.3582	1.87233	23.7281	20.2201	9.30685	18.2026	14.7453	84.6609	87.0274	84.8915	50.0213	61.8348	56.6234	36.2752	18.5317
TN2245	3-hydroxyguanfacine glucuronide	HMDB0061096	C15H17Cl2N3O9	72.7408	72.7408	418.019	86.489	121.632	55.5026	73.4828	113.994	108.386	50.7099	85.2016	102.767	83.5275	64.7183	112.223	88.3699	115.611	101.821	66.4125	88.2524	118.996	53.0354	115.696	67.6073	110.77	75.3721	104.142	111.732	83.3064	112.59	89.1236	107.6	88.0603	93.9309	123.077
RP1433	4-hydroxymidazolam	HMDB0061090	C18H13ClFN3O	74.1449	74.1449	364.063	317.117	265.386	250.49	317.001	271.29	282.12	341.544	273.874	220.132	197.285	216.149	185.989	159.05	187.544	242.734	235.004	258.204	223.109	205.922	221.523	199.838	190.098	176.417	192.924	255.608	305.558	227.804	256.728	196.869	194.327	201.111	200.202
TN796	S-methylazathioprine	HMDB0061068	C10H10N7O2S	75.4305	75.4305	314.045	37.4408	20.4848	21.03	29.3562	24.3671	21.273	21.3276	22.2926	24.9601	26.5323	30.5315	29.974	58.3746	24.1004	20.8445	28.6954	38.4888	31.9697	29.747	33.5729	41.7349	35.4539	42.0835	39.0082	46.4703	35.9842	35.4026	38.5623	35.6106	35.9547	38.939	37.3756
RP1175	7-hydroxygranisetron	HMDB0061062	C18H24N4O2	562.798	562.798	311.19	600.102	617.078	586.841	587.926	580.591	534.959	549.074	520.806	551.181	541.227	534.068	517.393	531.661	531.604	543.502	539.325	874.257	651.753	774.053	1646.72	706.589	1469.65	1378.25	647.56	1956.69	1625.39	1612.79	5321.62	1481.8	3928.26	3432.55	1838.53
RP943	4';-hydroxytrazodone	HMDB0061060	C19H22ClN5O2	604.441	604.441	370.144	202.426	143.771	222.337	208.017	191.131	184.986	190.746	180.534	143.452	199.931	174.933	168.92	171.109	179.328	149.453	164.173	200.191	153.544	152.656	218.317	194.437	160.781	170.859	133.124	148.55	99.9209	146.764	96.2171	136.091	139.308	148.468	155.787
TN1281	4-hydroxytriazolam	HMDB0061052	C17H12Cl2N4O	113.314	113.314	341.035	201.231	132.497	162.513	148.672	169.064	116.615	158.353	135.983	150.775	150.725	145.013	188.492	64.5885	177.108	161.149	197.348	280.687	180.529	203.256	135.392	243.953	137.089	230.02	191.141	209.47	212.163	151.183	186.288	218.288	169.915	141.759	110.343
TN2647	simvastatin hydroxy acid	HMDB0061047	C25H40O6	624.965	624.965	437.291	119.372	156.353	129.612	237.417	122.643	87.2551	169.574	151.116	331.397	67.044	210.396	130.067	53.2086	110.801	97.8216	231.416	145.335	73.004	196.551	131.862	167.79	118.988	70.7684	115.507	370.453	56.4845	91.7471	185.094	225.96	119.724	40.6368	58.8224
TN2239	M2 di-hydroxylated metabolite	HMDB0061046	C24H28FN3O3	953.863	953.863	408.222	221.477	177.77	205.525	28.3035	218.256	249.958	194.298	164.682	262.679	154.032	234.874	228.015	71.1359	189.817	249.993	176.578	150.841	235.091	175.617	168.311	176.576	99.706	148.472	98.2567	238.492	269.135	364.552	219.996	203.164	360.625	261.282	175.371
TN2639	Hydroxy Ritonavir	HMDB0061044	C37H48N6O6S2	282.123	282.123	701.295	17.6234	14.1069	19.2428	14.1815	8.83793	11.4933	15.8163	15.6132	18.0029	13.3747	16.5165	11.3969	1.50825	16.6035	14.1258	21.6791	15.8027	17.9903	11.4698	16.6503	13.1748	8.04808	17.2155	10.4739	9.92621	17.8131	18.085	11.8869	20.3479	26.9817	17.9665	8.99671
TN2453	N-debutylhalofantrine	HMDB0061032	C22H22Cl2F3NO	73.4794	73.4794	408.094	57.9799	33.2892	37.9616	29.3802	41.9739	41.0414	37.454	35.6343	38.5856	23.9689	28.4309	47.6201	25.9562	34.5045	42.7279	39.7721	34.8942	35.8651	30.4024	39.1173	38.5467	24.5836	35.0582	36.462	42.7651	43.507	38.8686	47.813	34.6393	41.3911	45.2205	33.982
TN746	omega-hydroxyfinasteride	HMDB0061030	C22H34N2O3	366.171	366.171	397.246	705.322	750.052	669.918	663.27	670.172	630.991	638.259	656.469	675.16	686.09	692.098	646.09	532.237	637.447	635.064	625.052	580.423	586.72	592.512	579.684	640.243	611.668	593.381	607.616	626.445	628.921	618.344	613.715	641.507	650.223	638.559	595.71
RP646	6-beta-hydroxydexamethasone	HMDB0061022	C22H29FO6	291.352	291.352	447.158	30.4526	37.9582	39.9741	42.1205	36.4048	35.2425	43.738	45.8456	55.9706	63.3236	58.8244	66.3135	52.0829	52.3808	77.4625	74.0803	92.7376	55.4586	88.0186	61.6878	113.608	73.6552	121.597	111.921	130.706	109.119	109.16	99.1917	85.3254	138.949	155.286	123.516
RP3402	desmethylastemizole	HMDB0061013	C27H29FN4O	387.818	387.818	462.267	2556.47	3558.46	1072.64	4197.44	2635.61	1566.56	3557.68	1849.21	3548.41	1891.41	4377.29	2020.63	3903.62	2628.06	1431.78	2455.85	2436.92	1932.55	2663.77	4115.86	3611	3711.26	3580.96	3205.97	10337.2	1623.14	2181.41	4470.7	5606.71	2368.13	1229.96	1861.84
TN1189	(2S,3R)-2-[(1R)-1-[3,5-bis(trifluoromethyl)phenyl]ethoxy]-3-(4-fluorophenyl)morpholine	HMDB0061012	C20H18F7NO2	258.343	258.343	420.116	81.0691	62.8273	74.7426	52.6145	70.9985	57.5731	79.0017	58.3136	79.812	69.3333	95.6008	60.4787	37.7802	59.7145	78.5576	70.7399	65.6388	58.2733	72.1346	56.7674	82.3439	71.3638	88.7169	69.0653	79.6467	89.1279	65.3724	81.1227	123.208	100.073	82.0625	76.6727
RP206	repaglinide aromatic amine	HMDB0061005	C22H28N2O4	651.045	651.045	367.202	256.064	522.1	578.287	430.92	572.63	616.044	441.211	537.701	432.426	498.736	405.733	428.966	446.46	392.451	477.004	440.687	314.958	324.327	299.021	377.605	427.297	298.695	291.616	348.066	251.374	215.695	253.811	194.486	235.86	284.06	244.65	257.63
RP3107	norsertraline	HMDB0061002	C16H15Cl2N	87.7465	87.7465	309.093	733.122	595.466	2011.51	1323.61	1663.27	1149.44	1633.57	1616.28	1578.39	3528.5	1568.42	691.074	2159.08	1373.77	1135.51	1145.7	1338.74	1549.82	1597.62	3331.99	2562.88	2844.92	1028.49	1875.89	1113.51	839.422	1470.09	843.223	1575.37	2768.96	1757.22	2249.98
TN1688	6-hydroxychlorzoxazone	HMDB0060998	C7H4ClNO3	65.534	65.534	207.986	27.2291	27.5226	28.8102	10.7655	27.5838	24.9688	18.8036	15.6381	20.1455	19.2945	22.7666	27.5557	21.0376	17.7403	24.8441	15.9814	6.44097	25.0218	20.9572	16.1616	18.1776	13.9781	20.6042	19.7935	23.4662	24.2341	23.5939	26.9592	24.2677	23.301	27.76	22.1897
TN1019	N-Acetyl-3-hydroxyprocainamide	HMDB0060996	C15H23N3O3	666.577	666.577	294.179	101.73	81.5346	81.6221	63.1542	81.8441	82.4871	88.4454	103.948	98.5913	84.2306	115.838	116.195	40.1497	103.373	86.9784	74.6351	75.2956	71.8295	80.7591	72.3354	74.3002	72.232	67.0101	69.677	70.081	86.4846	75.3465	76.1847	76.2883	76.4453	68.8763	91.4122
TN2349	cycloguanil	HMDB0060974	C11H14ClN5	76.8916	76.8916	290.057	103.855	103.37	72.9426	121.402	75.6272	107.106	77.535	106.539	88.0314	77.9382	96.3833	112.312	55.6309	102.65	106.142	134.828	135.047	85.35	96.1101	118.818	81.0544	101.38	77.8018	117.581	88.708	94.7688	107.207	87.4343	113.03	118.388	83.7507	106.547
TN1712	desmethyladinazolam	HMDB0060969	C17H14ClN5	85.8639	85.8639	362.055	490.981	345.506	137.253	351.269	91.5064	158.153	158.076	180.7	72.6184	134.32	109.563	154.771	57.7999	185.006	114.367	141.978	183.332	193.279	74.1605	172.378	95.0523	226.286	81.4813	143.539	158.47	121.537	146.935	90.5468	142.19	160.7	130.499	169.761
TN2747	5-Chloro-4-(2-imidazolin-4-on-2-ylamino)-2,1,3-benzothiazdiazole	HMDB0060964	C9H6ClN5OS	96.0121	96.0121	231.974	117.085	77.0214	99.7238	48.1078	90.7029	36.7797	82.2843	30.7231	67.6269	28.6546	64.6639	38.5713	60.8754	40.6374	65.6649	25.6521	49.0233	38.9592	43.7123	57.3951	93.7094	59.7255	66.6712	49.6159	43.4654	55.1118	37.1566	85.3942	52.8398	56.2605	108.38	69.1459
RP1239	3-hydroxyropivacaine	HMDB0060962	C17H26N2O2	840.117	840.117	308.229	113.684	138.807	106.531	155.057	108.218	101.642	158.552	157.388	97.9938	89.5777	105.421	107.363	104.071	71.67	48.9635	69.6546	191.322	192.795	234.026	193.143	255.94	201.338	187.95	202.219	172.815	150.509	226.659	64.7009	106.579	110.447	116.486	162.205
RP481	N-desisopropylpropranolol	HMDB0060961	C13H15NO2	682.505	682.505	240.099	40.0806	37.2941	49.6988	42.4523	55.9455	49.9987	49.0219	54.7874	62.2323	55.5317	52.7478	56.8018	66.0859	64.3282	61.9686	76.7149	78.2131	77.8542	97.0468	94.6553	82.9901	85.9028	83.4228	90.0914	69.6532	83.6824	80.9047	69.5925	79.6847	87.1086	88.8911	78.8097
RP1975	2-hydroxyflutamide	HMDB0060949	C11H11F3N2O4	237.64	237.64	293.074	126.658	87.7247	100.012	124.678	116.557	147.345	127.729	178.705	178.256	158.281	103.416	194.337	142.674	104.171	99.9699	130.263	193.963	288.019	214.081	188.105	114.495	110.538	245.935	149.862	181.224	164.727	197.209	130.672	124.151	125.756	137.979	118.699
TN1412	N-Desmethylrosuvastatin	HMDB0060942	C21H26FN3O6S	347.344	347.344	490.134	70.7464	43.319	85.1447	55.8845	127.378	53.7527	67.6572	48.8739	147.999	99.4936	105.247	39.2057	22.3944	67.1792	213.841	82.3346	51.6321	45.4698	71.4645	105.613	62.5502	87.9567	49.1943	46.7943	68.4349	149.97	64.9053	89.8034	78.7461	100.378	81.7792	72.8966
TN2229	Rosuvastatin 5 S-lactone	HMDB0060941	C22H26FN3O5S	73.3205	73.3205	446.145	19.2652	82.0203	146.343	51.9525	33.1876	38.2509	33.3928	37.0535	17.3192	359.64	157.47	13.4826	15.2045	161.175	52.0087	20.1436	27.5777	15.0356	14.5685	118.222	36.1404	244.34	18.1397	24.913	12.7673	21.3708	16.751	27.3949	21.0964	54.1218	29.3928	51.9316
TN2796	3-trans-Hydroxycyclohexyl glyburide	HMDB0060939	C23H28ClN3O6S	74.2032	74.2032	474.123	27.8495	150.053	203.147	173.51	36.7553	37.6033	82.9882	107.011	33.1666	377.216	302.654	67.1269	19.4368	283.427	104.13	79.3222	87.4996	65.8787	38.3452	219.46	101.599	451.888	33.3176	96.1879	70.2563	20.6476	59.0109	24.7732	54.0732	155.929	43.3819	164.266
TN79	Buprenorphine glucuronide	HMDB0060928	C35H49NO10	1234.9	1234.9	626.325	44.3485	33.6014	54.1913	52.2397	48.6148	46.1385	45.4126	49.0117	46.1116	42.3302	41.8155	32.9606	9.34893	31.4309	14.5164	21.1921	2.96235	1.51488	2.86451	4.30988	4.67406	2.59451	2.35631	1.92983	1.68691	1.49651	2.91425	1.07496	1.33297	1.84832	0.849559	2.43492
TN1380	Indomethacin acyl glucuronide	HMDB0060922	C25H24ClNO10	74.4693	74.4693	572.072	44.5074	52.4053	39.4192	35.6714	42.925	51.9273	52.0544	36.1969	55.4169	43.0029	37.6018	50.1749	33.9299	47.2962	42.2452	47.7387	65.6059	48.0831	48.3546	39.2344	40.027	42.1879	41.2642	48.6358	62.301	69.5316	64.5336	56.9246	81.5652	55.428	46.7459	52.344
TN2101	Diclofenac acyl glucuronide	HMDB0060915	C20H19Cl2NO8	73.0421	73.0421	510.024	36.0549	61.5791	43.2812	42.6784	41.7915	41.0724	37.6704	33.7975	36.1751	75.904	45.6708	36.6375	28.7338	62.9896	49.7171	26.6187	28.9231	40.1855	29.4296	56.0243	27.1414	61.9138	31.1668	26.0636	39.7287	43.4848	46.2177	41.6822	38.3444	40.5072	43.5014	49.2167
TN1126	Zileuton O-glucuronide	HMDB0060914	C17H20N2O8S	258.899	258.899	413.102	349.94	320.794	356.32	306.941	346.554	258.706	347.21	298.559	391.349	345.255	446.875	291.147	135.756	293.671	376.275	335.462	353.071	307.45	309.697	286.659	406.78	354.662	429.988	368.891	411.884	431.329	340.148	346.944	362.772	413.916	405.278	391.385
TN247	N-Desmethylritonavir	HMDB0060896	C36H46N6O5S2	823.719	823.719	689.282	27.5951	21.9975	27.9728	22.8761	26.5837	27.5659	31.8815	28.0099	28.3232	26.3025	24.7419	29.9664	11.8788	36.2739	27.4647	30.5856	22.4756	16.958	21.9179	23.5245	23.4334	13.0426	20.6644	21.3418	13.5068	12.162	28.0713	9.37119	13.3896	30.3574	13.4342	21.0445
TN2180	4-Hydroxyvoriconazole	HMDB0060894	C16H14F3N5O2	81.0965	81.0965	404.071	62.9213	186.707	295.067	142.105	75.5031	66.2385	123.564	137.227	53.9334	386.684	188.245	63.2816	65.1186	241.605	85.3348	86.4689	62.2509	82.2414	69.475	247.319	95.6202	349.734	56.4677	84.1651	74.4439	40.1868	61.3852	42.2234	81.2742	143.94	102.622	129.108
TN837	Thioguanosine 5';-diphosphate	HMDB0060874	C10H15N5O10P2S	261.493	261.493	423.989	59.4721	50.6583	45.7342	46.4071	46.3198	51.6756	51.9814	55.486	47.747	52.6918	50.0512	50.654	54.5155	46.6142	44.333	47.4787	47.3623	47.1931	43.7995	33.6623	45.0186	42.9616	53.6176	42.6684	45.9223	47.7973	44.2977	45.2663	44.2094	45.6342	40.9431	42.5833
TN2479	Sorafenib N-oxide	HMDB0060873	C21H16ClF3N4O4	259.149	259.149	481.091	219.343	213.356	207.596	170.2	218.931	173.897	212.956	194.731	237.925	219.361	265.781	195.852	131.708	177.402	227.372	201.844	188.906	199.062	203.943	152.529	224.422	207.894	254.707	208.908	233.564	232.166	187.297	200.804	206.659	218.736	228.089	213.89
RP2891	Sorafenib beta-D-Glucuronide	HMDB0060872	C27H24ClF3N4O9	132.656	132.656	663.106	35.3154	40.6436	40.2828	30.3548	23.7851	21.3343	29.081	11.1726	14.7023	31.8797	23.0878	36.6392	49.7376	35.5061	44.2816	30.9371	36.4995	12.2147	16.2868	26.6864	30.9814	59.9221	50.6041	42.2079	37.6896	32.3165	8.01237	32.7035	16.1708	37.4279	35.9659	35.4207
TN1838	N-Oxide abiraterone sulfate	HMDB0060848	C24H31NO5S	280.752	280.752	428.197	69.2634	72.5918	109.292	103.129	64.5006	41.2444	94.5597	57.91	67.6401	100.793	89.801	48.1177	7.21156	88.2897	71.0408	72.1863	68.1107	43.3852	40.8547	105.604	93.4807	59.3949	61.9186	61.6387	74.0626	84.1202	71.6938	59.3299	31.8998	73.2262	70.5751	61.2796
TN1676	N-Monodesmethyl-rizatriptan	HMDB0060847	C15H19N5O	1023.29	1023.29	250.146	172.819	131.861	128.651	135.362	135.464	138.636	129.895	128.96	125.754	115.94	130.32	115.441	120.74	103.912	91.6908	96.0785	115.999	127.681	95.74	73.2942	80.8237	72.7885	93.9501	93.6011	101.344	91.6723	91.99	97.6187	96.7704	98.8556	104.301	115.638
TN2449	N-Despropyl-rotigotine	HMDB0060841	C16H19NOS	143.69	143.69	256.116	218.165	194.371	179.003	155.27	200.289	176.003	226.468	254.212	204.494	107.004	139.26	351.12	120.594	149.032	113.99	122.658	137.288	314.46	286.49	115.254	121.194	48.6026	225.147	129.712	270.555	185.487	159.94	128.43	226.107	148.354	162.026	104.659
TN263	N-Desmethyldoxepin	HMDB0060840	C18H19NO	958.284	958.284	266.153	8.90289	10.6655	8.62507	10.0209	8.93014	8.12233	7.38892	6.00362	7.4795	8.74714	12.0782	21.6518	15.4962	11.7326	31.9454	18.158	18.1713	19.6845	24.2439	22.0755	23.619	36.5044	18.3556	15.8357	17.9807	32.7121	18.0894	29.5032	19.9033	23.1803	26.6176	22.4323
TN2027	N-Desmethyl-p-O-sulfate rosiglitazone	HMDB0060839	C17H17N3O7S2	160.838	160.838	478.011	45.5426	27.3882	43.395	28.5423	41.1164	35.208	46.2896	30.3903	55.0663	29.2282	51.0078	35.2318	31.6349	32.9771	52.4637	43.6278	41.5032	52.9409	63.263	38.7543	46.5356	30.0034	51.5028	33.6681	42.0915	62.1434	44.4596	55.7557	42.5424	35.3405	44.168	32.6947
TN1293	N-Desmethyl vandetanib	HMDB0060835	C21H22BrFN4O2	73.6641	73.6641	425.081	1820.82	2089.98	1245.68	1976.27	1347.02	1308.93	1813.96	1384.83	1960.53	986.674	1676.14	1805.37	645.287	1394.72	1891.02	1820.53	3243.78	1443.39	1867.87	1677.97	1973.44	2774.98	1905.62	2182.75	2273.38	3053.37	2259.39	2061.97	1055.64	1806.47	1700.1	2068
RP2074	meta-O-Dealkylated flecainide	HMDB0060831	C15H19F3N2O3	94.9106	94.9106	350.17	46.3366	55.6452	63.7988	71.6235	58.6094	113.51	140.54	176.885	308.501	128.764	133.437	259.475	44.9826	230.675	126.445	185.275	186.203	266.907	260.846	176.179	87.3295	69.1652	143.223	36.7052	194.995	193.835	230.008	252.163	172.372	151.47	110.91	36.0194
RP2180	Melatonin glucuronide	HMDB0060830	C19H24N2O8	232.783	232.783	431.14	393.066	2673.3	5497.16	2986.71	1109.46	300.356	1894.54	1257	358.05	3398.27	5272.11	1226.27	2479.82	4385.58	3754.69	946.166	87.6269	9.87939	6.32674	3350.93	2416.41	4443.66	524.384	1998.18	104.194	20.661	38.5283	121.064	53.4127	2377.8	429.193	3418.64
RP2319	Doxorubicin-semiquinone	HMDB0060822	C27H33NO11	233.063	233.063	570.197	41.525	160.64	283.818	259.852	72.3961	26.4068	188.929	126.534	35.1387	348.306	341.821	151.941	130.31	235.292	276.153	77.3709	52.2934	37.5344	3.86589	317.24	206.247	256.735	45.5271	143.63	11.2059	5.81585	37.3182	21.3424	9.7865	167.851	103.463	185.951
RP774	Dihydromorphine-3-glucuronide	HMDB0060821	C23H29NO9	604.575	604.575	481.217	65.4304	87.1963	86.4024	82.5075	101.199	79.3331	79.701	102.251	95.9861	104.155	95.776	77.6467	104.564	98.1025	76.7422	100.054	69.9024	66.5638	61.1293	103.622	80.8394	82.9187	74.6715	77.9614	81.824	60.8365	73.9404	51.0407	91.4953	64.1469	65.4315	73.8482
RP2172	Diethylcarbamazine N-oxide	HMDB0060817	C10H21N3O2	780.144	780.144	198.157	11.0623	20.3349	24.1168	27.3549	28.8667	27.5423	47.6708	29.1142	31.9863	34.5567	14.8367	33.7705	25.3881	32.8363	27.5975	25.2334	30.9759	30.0104	39.6992	52.4676	39.844	34.8619	21.5696	40.8744	41.1003	35.7318	34.6343	36.3113	25.9224	21.659	28.5917	25.5697
TN1771	8-Hydroxythioguanine	HMDB0060804	C5H5N5OS	74.5688	74.5688	166.02	410.304	519.924	294.666	229.571	589.185	513.087	253.132	246.31	505.033	222.974	351.501	528.292	303.653	468.028	437.807	469.921	389.644	469.404	264.973	323.774	359.433	234.697	223.122	340.699	314.368	383.349	721.22	479.256	436.268	367.787	270.035	469.824
TN1752	6a, 3';-p-Dihydroxypaclitaxel	HMDB0060795	C45H47NO18	73.7438	73.7438	872.278	17.0967	13.3325	7.2926	6.87575	13.4794	15.263	7.25931	8.03896	14.2882	5.16278	13.9714	11.8911	3.51188	15.6112	18.4478	14.1477	13.16	9.70803	10.7296	9.60362	9.47665	10.5383	3.57688	12.7545	10.3993	14.316	14.7115	13.8456	21.3572	14.7799	6.28607	7.09458
RP3117	6-Hydroxymelatonin glucuronide	HMDB0060786	C19H24N2O9	870.478	870.478	447.137	31.8115	24.8585	24.7728	33.1504	51.4396	30.5784	86.0636	26.1299	110.026	21.8129	150.378	47.2656	169.693	104.956	90.039	105.997	151.585	136.272	99.2665	114.793	146.279	41.3837	135.026	38.0213	86.766	33.185	56.628	29.4694	20.4021	21.4585	90.7624	17.927
TN1965	6-Thioguanosine-5';- O- triphosphate	HMDB0060781	C11H18N5O13P3	172.749	172.749	504.015	24.9038	69.1711	19.998	59.6541	29.7844	60.0397	24.1485	54.8462	27.7669	55.7004	21.6692	71.755	6.9812	94.4698	25.9646	74.0563	44.4217	32.5952	20.5218	97.9285	25.8279	86.8664	34.1813	71.6081	55.7361	18.7841	41.9971	20.0967	47.9926	78.1077	53.0803	61.3346
RP1672	5';-Carboxy meloxicam	HMDB0060779	C14H11N3O6S2	118.098	118.098	403.996	24.3773	21.0402	13.2807	18.4567	19.8266	22.361	16.0019	16.2116	19.6142	7.55489	28.1734	27.5873	27.9694	13.954	20.4929	21.8932	21.3972	26.155	22.5395	14.0501	29.4221	25.4922	17.2595	25.2952	24.392	20.3204	22.3968	16.857	29.6917	27.0514	30.9521	29.3392
TN1825	4-Hydroxyphenytoin glucuronide	HMDB0060769	C21H20N2O9	253.731	253.731	445.122	28.5204	308.95	359.648	200.678	48.8379	25.7282	165.059	120.421	27.6533	546.397	241.421	44.5619	12.8568	474.204	154.265	44.1416	16.7175	16.1662	17.9427	312.664	87.327	382.46	27.6532	52.566	21.7544	17.7577	17.5286	25.9395	18.3212	143.249	26.7736	122.522
RP3016	4-Hydroxy-estazolam	HMDB0060764	C16H11ClN4O	72.5039	72.5039	293.059	114.999	170.106	250.395	237.883	116.93	103.769	229.461	234.754	129.699	169.351	286.376	181.797	186.956	218.769	184.688	130.232	108.921	73.0354	90.6085	441.216	320.164	255.5	158.926	199.415	111.12	82.4079	99.5837	128.527	103.653	314.136	128.128	220.972
RP848	4-Carboxypyrazole	HMDB0060760	C4H4N2O2	69.3812	69.3812	130.061	988.313	1342.37	1144.01	1151.28	1425.12	1180.51	1322.3	1145	1426.76	1291.63	1332.92	1141.64	1315.01	1440.74	1454.59	1522.03	1404.48	1224.55	1332.82	1393.06	1587.19	1353.84	1282.64	1413.04	1775.81	1509.34	1467.82	1383.89	1505.96	1662.86	1737.02	1744.53
RP1010	4-Carboxynevirapine	HMDB0060759	C15H12N4O3	243.447	243.447	314.124	104.052	110.906	166.029	150.828	96.7099	85.6887	152.302	116.173	103.057	168.11	118.581	122.632	117.715	135.692	90.2077	109.504	101.294	87.6486	74.834	104.65	110.65	103.405	99.436	103.739	112.55	95.0372	83.5065	74.7451	103.621	125.027	139.079	124.102
RP2984	4-Anilino-4-oxobutanoic acid	HMDB0060758	C10H11NO3	67.1866	67.1866	232.034	335.728	280.318	385.581	279.246	437.377	520.232	273.364	287.556	312.07	224.709	253.897	280.596	324.064	285.076	359.11	364.625	462.561	497.362	477.112	293.401	341.319	335.238	276.539	416.913	267.578	406.276	285.045	361.085	231.658	247.028	247.765	238.879
RP122	3a-Hydroxydesogestrel	HMDB0060755	C22H30O2	645.717	645.717	327.231	31.2575	1041.57	560.231	872.544	772.093	909.971	961.082	755.251	848.662	671.857	740.102	719.023	833.544	517.885	575.996	513.434	59.0358	91.9516	112.943	57.2076	97.0688	59.0424	44.8769	139.76	49.8735	58.2081	42.173	42.38	39.8744	28.3731	30.758	38.9974
TN1161	3';-Azido-3';-deoxy-5';- O-beta-D-glucopyranuronosylthymidine	HMDB0060752	C16H21N5O10	280.898	280.898	408.116	56.4615	16.284	27.4544	16.194	13.5853	25.8965	11.6637	11.4727	17.3523	12.4715	38.1912	40.5885	5.18052	19.1053	20.4472	25.2262	34.2704	52.7498	20.9653	35.9915	53.5321	25.1382	30.363	60.3539	15.0816	28.9817	26.5084	33.2555	41.3822	37.1596	42.8911	52.258
TN1666	3-keto-Digoxigenin	HMDB0060746	C23H32O5	1163.13	1163.13	371.221	49.5431	46.5129	77.5008	53.6393	62.4053	71.8646	75.6415	67.3022	45.6584	51.758	43.3696	45.9229	26.2553	44.3262	50.4643	55.1574	67.512	71.5469	60.3631	65.7046	65.2249	48.1795	58.822	61.0821	60.7179	52.6056	68.9862	49.8843	50.2165	59.7342	62.306	70.639
RP3447	3-keto Fusidic acid	HMDB0060745	C31H46O7	675.653	675.653	548.361	581.694	838.638	1268.78	859.971	720.273	666.09	850.785	583.108	841.241	1192.87	458.206	495.712	465.58	654.314	489.081	490.062	595.812	565.498	548.085	1462.31	1457.68	1011.18	727.681	1140.07	608.687	607.017	671.93	454.874	609.058	915.861	989.475	821.212
TN2572	2';,3';-Dideoxyadenosine-5-triphosphate	HMDB0060728	C10H16N5O11P3	263.993	263.993	497.997	60.0352	60.418	52.2466	50.425	53.4708	97.9588	57.4234	59.1821	63.7777	55.0591	57.8016	61.7115	162.177	53.5167	55.142	53.1239	56.0072	60.7753	60.4744	37.3767	52.9696	56.5811	129.135	57.5615	66.1135	54.7949	61.0699	49.8753	60.1408	50.0887	68.1383	58.4468
RP2875	2,8-bis-Trifluoromethyl-4-quinoline carboxylic acid	HMDB0060726	C12H5F6NO2	90.2996	90.2996	327.056	94.868	104.426	124.91	119.326	144.176	137.866	150.949	154.428	78.3867	121.383	131.123	114.677	117.941	105.577	126.754	137.98	170.592	170.608	265.56	120.731	127.872	121.592	109.192	122.556	174.301	238.799	230.801	160.034	124.046	103.746	107.368	103.449
RP3257	2,6-Pipecoloxylidide	HMDB0060725	C14H20N2O	731.378	731.378	250.188	72.2412	80.1439	69.6259	85.9535	91.7602	85.9528	100.419	106.992	92.8931	90.5707	87.6844	90.145	93.7831	91.8942	101.688	84.6655	77.195	95.4117	105.189	93.4319	104.849	103.851	90.5307	93.0072	104.322	99.403	104.382	95.8933	84.9169	70.135	83.3185	90.4923
RP480	2-Hydroxydesogestrel	HMDB0060719	C22H30O2	584.247	584.247	327.231	36.102	29.4839	24.3696	29.2098	27.5176	34.8837	22.7244	28.483	38.2348	30.4491	30.8229	37.5645	28.4099	47.0333	29.1827	29.55	966.874	695.987	854.708	1259.04	771.034	1089.54	783.933	423.832	1253.08	1327.5	1120.62	1682.83	996.726	1411.17	1124.59	1083.97
TN1297	2-Hydroxy-imipramine glucuronide	HMDB0060717	C25H32N2O7	473.099	473.099	437.211	81.2438	66.9823	31.2672	48.118	39.8381	60.0015	38.392	43.9852	40.0956	24.1591	25.914	52.4519	8.90572	40.2259	35.7858	44.6203	42.4289	39.7698	25.2185	22.7375	33.7243	35.6879	31.5385	32.1417	25.3365	37.7252	22.1267	40.3297	64.5282	24.2174	23.3853	15.9027
TN714	2-Hydroxy-4-trifluoromethyl benzoic acid	HMDB0060715	C8H5F3O3	71.2532	71.2532	171.007	110.411	35.1979	157.456	100.001	157.159	120.55	103.597	167.029	135.136	76.7967	89.6414	104.016	80.3293	62.3262	102.214	138.88	225.6	211.771	362.558	277.071	197.859	131.362	325.545	294.695	153.294	227.502	309.334	95.135	90.8056	245.955	215.096	258.757
TN2768	2-Chloro-2';-deoxyadenosine-5';-triphosphate	HMDB0060713	C10H15ClN5O12P3	70.2324	70.2324	547.936	40.68	42.6292	28.4333	13.811	57.6698	51.1307	24.4993	19.3337	48.8555	12.4478	22.746	54.1297	50.7366	31.3602	45.9174	30.4202	27.1573	50.0164	32.5454	36.3511	24.723	11.0896	39.5099	31.3951	36.7806	50.6454	48.0849	46.6761	41.324	42.2765	48.2982	39.573
RP391	17-Hydroxymethylethisterone	HMDB0060710	C22H30O3	587.278	587.278	343.226	30.2875	38.422	58.7482	32.6785	29.6627	35.6743	23.539	24.9991	35.9372	31.0147	41.8489	54.8393	32.8884	51.7698	40.0863	41.0535	376.824	276.95	313.531	482.637	268.009	440.062	289.202	234.384	556.864	536.602	453.464	792.693	434.757	640.038	494.463	454.097
RP704	1-Hydroxylorcaserin	HMDB0060704	C11H14ClNO	262.401	262.401	234.065	25.3259	17.1449	31.6641	37.5598	30.331	29.2971	29.5448	24.2733	28.6084	36.4843	28.8144	28.7793	26.5367	26.9203	34.1768	32.8125	36.9247	33.9124	32.4437	37.6207	37.7159	36.6893	38.0022	38.2849	40.716	38.1813	40.246	37.3429	31.161	43.3259	42.2172	34.5032
RP3049	(E)-2-Hydroxy-N-desmethyldoxepin	HMDB0060699	C18H19NO2	303.835	303.835	264.141	38.145	42.196	58.573	64.6566	45.6326	27.9414	43.405	36.957	45.3788	92.3679	65.9494	49.342	40.7747	61.1513	50.5418	46.7005	42.8465	38.8093	32.3485	84.6183	56.6364	75.2848	59.3125	64.6231	55.5976	55.8018	45.1902	53.3295	53.6908	94.6682	97.4738	91.2374
RP3034	Phosphoramide mustard	HMDB0060689	C4H11Cl2N2O2P	113.843	113.843	221.004	124.359	83.97	108.997	107.708	307.495	92.9012	70.256	71.9598	81.8578	79.8643	138.359	133.727	145.028	109.096	124.261	118.202	75.0668	89.414	80.7305	87.3306	102.731	107.602	118.68	103.019	92.2789	91.1379	89.8925	90.6924	95.2976	133.838	117.857	128.396
TN2535	Nornitrogen mustard	HMDB0060688	C4H9Cl2N	70.2383	70.2383	124.008	3817.63	4330.75	2889.43	1327.24	4298.22	4040.29	2693.72	2521.24	3153.91	2193.11	2873.02	3765.78	2679.45	2733.23	4109.38	2921.03	2271.05	3519.7	2203.74	2640.12	2818.69	1541.85	3027.62	3024.96	3740.91	3460.47	4125.13	3599.94	3449.51	4298.2	4004.17	4193.49
TN1573	Carbamazepine iminoquinone	HMDB0060675	C14H9NO	79.2617	79.2617	246.032	58.912	94.8764	51.3592	92.5148	62.3882	87.6559	53.5104	84.202	51.5668	75.1193	58.1847	75.7665	194.003	83.7751	57.7254	75.6514	79.0437	78.9143	65.7134	101.309	68.441	106.043	61.2342	110.848	86.4638	77.4472	104.608	71.5303	109.112	99.8956	79.6109	138.281
RP1821	Isoniazid alpha-ketoglutaric acid	HMDB0060663	C11H11N3O5	103.784	103.784	304.033	89.8271	73.5556	78.4793	85.2276	82.5995	57.2194	73.4156	68.9825	88.2258	75.7913	86.6223	82.4744	100.792	64.8586	97.9535	109.232	88.1367	74.2672	65.5183	88.0284	98.2796	97.5059	87.159	74.035	77.6652	83.7017	80.0333	96.9481	138.108	96.4184	95.2796	72.8249
RP1849	cis-Hydroxy Perhexiline	HMDB0060644	C19H35NO	844.763	844.763	311.308	661.84	942.114	854.512	804.343	644.592	222.772	140.618	157.38	157.836	146.574	146.102	169.892	149.185	162.618	143.593	168.521	189.944	181.495	157.887	210.369	228.172	205.936	243.979	205.202	174.247	144.17	160.479	158.553	147.764	138.461	151.022	138.463
RP3315	Tizoxanide glucuronide	HMDB0060643	C16H15N3O10S	72.8598	72.8598	480.009	81.0194	67.9095	87.2243	53.3448	99.5962	90.1078	86.4937	80.8737	89.2548	69.2456	70.6349	112.024	107.097	52.8723	85.7299	77.2516	66.5736	101.416	68.9351	93.2859	66.9982	53.8651	79.7734	112.642	101.172	78.8921	92.7853	65.1478	93.4409	83.034	108.067	93.4019
RP2134	Lamivudine-triphosphate	HMDB0060640	C8H14N3O12P3S	68.2423	68.2423	491.939	41.495	29.927	17.2782	20.4867	46.4846	49.9374	24.7215	20.9138	36.0675	11.8958	28.3409	35.3748	40.8822	17.8845	32.9722	28.6683	34.6983	46.3223	34.4276	25.231	42.8861	12.9542	22.7198	30.6473	34.2704	42.8446	46.4298	39.5825	34.9003	31.9291	57.2278	36.7819
TN1467	Gemcitabine diphosphate	HMDB0060639	C9H13F2N3O10P2	347.591	347.591	424.017	25.2567	24.2129	24.3751	28.3306	20.8329	22.7766	24.9115	21.9355	23.8908	19.3748	22.934	22.9868	6.89375	22.156	19.9438	19.5921	15.7519	13.3639	14.3219	26.6839	20.2934	25.1291	17.5998	22.0937	18.8848	18.9783	15.9905	26.5878	16.3618	25.0872	16.1008	21.4569
TN729	Malathion dicarboxylic acid	HMDB0060636	C6H11O6PS2	647.189	647.189	274.98	159.139	167.627	144.462	154.29	144.053	150.655	153.754	157.164	158.346	155.047	152.007	146.429	141.756	135.741	134.693	137.39	146.878	147.872	148.604	143.435	146.913	153.809	151.3	152.176	154.811	154.298	153.714	153.696	155.302	159.767	156.087	162.074
TN2186	Ethionamide sulphoxide	HMDB0060624	C8H10N2OS	92.3975	92.3975	221.017	115.699	426.574	279.353	268.469	137.526	152.642	161.805	198.417	127.026	674.598	283.298	182.477	33.6166	449.001	213.691	190.108	199.399	147.79	86.3556	331.321	163.844	436.96	132.575	152.638	192.019	130.59	138.482	179.353	111.288	290.588	133.512	234.032
RP260	Penicilloic acid	HMDB0060617	C16H20N2O5S	260.233	260.233	391.074	52.8022	48.8047	62.9498	63.5263	56.1094	54.3838	60.9221	63.9412	60.7602	67.3067	54.1398	64.6746	51.1336	72.1079	65.6397	60.4871	71.1297	75.1477	71.5995	77.6519	71.1914	62.2333	78.4401	70.6595	86.0987	79.7385	71.518	80.3158	65.6009	82.4548	95.6138	86.8964
TN362	Hydralazine acetone hydrazone	HMDB0060606	C11H12N4	1180.55	1180.55	183.103	3.45328	2.06688	4.04509	3.48387	13.9341	6.79577	8.365	12.79	4.27355	8.34662	11.6186	11.2958	5.02116	11.1963	8.18322	10.6445	27.2073	18.1679	30.2259	32.8547	20.6766	20.0909	25.037	26.7887	31.9929	22.8632	21.4054	9.40816	17.8429	14.2407	14.0967	11.3468
TN682	N-Trifluoroacetyladriamycinol	HMDB0060586	C29H30F3NO12	277.599	277.599	664.158	311.363	500.487	249.952	281.238	199.244	238.776	242.68	251.125	238.542	160.141	267.862	342.194	48.235	214.448	166.094	220.487	207.367	191.398	168.986	144.669	162.678	202.481	179.071	180.752	148.035	151.388	136.204	178.821	154.757	125.055	70.8789	81.8927
RP1664	Benazeprilat	HMDB0060582	C22H24N2O5	73.397	73.397	419.158	144.766	112.745	535.708	89.0748	141.649	95.2191	154.682	108.216	85.7172	332.668	112.558	20.5772	29.434	385.451	159.712	74.2876	22.8406	57.4768	26.1158	104.784	42.3683	201.476	23.7034	48.3446	42.7626	37.7643	71.1594	36.8595	22.7371	43.9321	38.551	70.6959
TN1763	b-Dihydrotetrabenazine	HMDB0060578	C19H29NO3	300.248	300.248	342.203	78.0471	106.707	100.385	80.1704	78.2398	75.0001	78.4367	80.0853	77.0753	107.927	89.0581	74.5131	44.697	103.027	78.0625	78.3988	78.2091	64.1743	70.3336	88.5569	81.1708	84.6416	75.4784	74.8137	74.5327	83.8366	73.8196	76.6559	83.462	80.4446	78.4187	78.9807
TN1449	Carboxycelecoxib	HMDB0060571	C17H12F3N3O4S	160.963	160.963	450.011	107.873	57.8914	93.1542	67.0504	98.7501	83.0836	100.195	70.8733	127.561	68.1003	123.836	84.2892	64.1882	84.9556	113.618	96.37	103.916	129.226	146.819	100.244	100.521	76.9424	122.123	90.9176	98.4154	147.726	120.375	123.23	104.572	88.493	99.1576	75.2635
TN1925	Carbamazepine-O-quinone	HMDB0060566	C15H10N2O3	84.2333	84.2333	231.056	159.726	86.6531	170.319	138.29	122.269	93.9028	147.354	117.812	136.78	107.061	136.985	110.857	14.7936	117.989	147.041	132.149	98.7725	90.9023	110.487	214.917	190.91	86.1648	198.639	98.2919	127.988	134.057	88.9442	102.922	91.3574	212.53	192.962	167.519
TN1304	E-3174	HMDB0060553	C22H21ClN6O2	135.902	135.902	401.13	103.416	98.2485	88.7941	123.429	71.2847	100.551	68.6415	113.58	75.659	169.364	90.1606	115.505	68.9522	146.683	75.9191	143.225	70.4906	138.338	62.9358	148.44	96.2764	114.344	102.392	106.229	206.979	97.9549	184.463	157.668	80.2193	205.262	115.531	145.922
TN2396	Hydroxybuprenorphine	HMDB0060547	C29H41NO5	922.92	922.92	466.295	1028.64	406.191	933.12	744.785	742.028	850.64	837.515	894.134	527.664	477.545	365.756	436.387	163.043	418.601	412.837	344.766	660.96	550.941	893.583	912.796	662.454	580.223	767.095	635.197	366.328	483.593	516.5	275.384	390.943	448.004	437.582	336.911
TN759	Norbuprenorphine	HMDB0060546	C25H35NO4	980.311	980.311	414.263	18.5195	2.21836	9.5877	10.4402	17.58	14.2911	14.2445	14.4543	29.5734	17.3636	46.7156	21.4322	6.49176	20.0991	25.2601	54.2992	29.6637	39.5441	48.2741	31.3252	45.1542	48.2325	16.559	19.1109	56.8574	91.9532	66.8614	56.1143	221.899	162.128	74.8662	66.0372
RP3131	O-Desmethylindomethacin	HMDB0060545	C18H14ClNO4	89.5875	89.5875	326.058	386.217	481.47	458.675	524.891	569.045	583.187	676.203	654.093	2108.59	455.71	509.512	523.66	563.227	454.217	485.739	467.676	684.931	674.129	1103.64	443.093	499.575	608.742	470.905	705.54	533.858	937.86	722.213	538.365	505.207	390.574	398.04	505.318
RP3421	N-Desmethylzopiclone	HMDB0060541	C16H15ClN6O3	72.3046	72.3046	397.078	53.6654	57.5225	80.1926	61.9452	68.3745	79.2843	64.2752	50.6844	38.7599	97.7009	48.6238	44.7626	48.9487	63.5335	61.4446	52.8754	46.8046	46.259	43.2089	119.894	54.8144	60.1977	44.4564	55.805	55.7858	54.0311	78.7608	120.049	53.0424	66.1924	64.7237	69.7696
RP1288	Norverapamil	HMDB0060540	C26H36N2O4	861.901	861.901	479.232	142.625	110.474	147.792	150.169	137.193	184.998	170.212	165.636	159.829	149.991	133.927	120.991	178.594	100.479	137.604	131.367	98.9889	131.21	142.211	136.37	155.937	81.8421	108.597	108.992	99.2155	132.981	116.158	94.8669	113.402	90.7243	115.704	69.466
RP777	Desmethylnortriptyline	HMDB0060531	C18H19N	297.093	297.093	250.158	88.1962	70.7115	74.3774	78.4243	77.6626	72.3147	79.7454	82.9988	87.7454	83.6269	77.7114	93.1023	81.3268	85.248	82.1827	106.243	113.228	105.611	94.2875	90.7773	92.0956	93.0918	135.807	102.32	91.4893	104.838	106.008	96.6549	84.6511	83.1526	84.7528	83.4921
TN343	Kukoamine D	HMDB0060527	C28H42N4O6	832.122	832.122	569.273	418.947	378.45	511.36	648.571	683.99	473.682	579.821	472.202	432.503	374.011	597.467	490.356	142.791	366.93	370.505	365.398	319.526	328.386	416.003	301.521	316.864	264.077	322.69	274.501	317.746	448.491	287.2	289.403	441.391	243.925	212.263	265.239
TN1309	Kukoamine C	HMDB0060526	C28H42N4O6	868.844	868.844	531.324	251.887	194.354	322.418	254.848	200.061	206.867	235.103	220.209	131.575	363.877	132.919	140.651	49.2629	226.175	112.872	108.239	113.201	110.117	98.6145	210.319	230.772	190.541	146.92	203.351	127.86	122.94	128.92	81.3431	126.401	199.557	198.224	187.499
TN562	Kukoamine B	HMDB0060525	C28H42N4O6	762.574	762.574	569.274	236.309	256.49	231.637	252.547	258.912	264.183	259.615	247.608	193.541	262.608	225.462	209.537	111.976	190.677	183.353	192.283	161.717	193.686	150.011	201.575	225.089	203.097	166.242	213.086	164.374	150.084	183.494	186.573	158.908	140.051	210.27	217.276
TN100	Trypanothione	HMDB0060520	C27H49N9O10S2	824.75	824.75	688.282	134.359	131.645	139.703	102.858	113.011	115.532	123.498	136.11	122.113	111.422	118.363	130.798	62.1525	134.153	108.919	126.844	94.7047	110.686	92.9089	106.173	93.8255	61.816	70.0982	74.9141	98.5056	81.1805	110.526	57.314	53.9173	108.588	71.1881	71.1517
TN1914	SN-38	HMDB0060510	C22H20N2O5	79.7832	79.7832	431.1	113.484	343.469	616.263	159.268	152.797	133.787	217.291	150.557	113.946	592.032	482.256	117.613	41.361	370.722	266.371	142.352	96.6191	134.736	73.8999	332.098	210.988	637.165	107.029	108.038	81.4206	90.6782	107.872	73.3201	114.281	185.67	158.668	151.184
RP2957	S-(1,2-Dichlorovinyl)glutathione	HMDB0060504	C12H17Cl2N3O6S	66.9912	66.9912	439.983	16.8281	12.1181	9.80397	12.0533	22.7931	18.6414	14.8312	15.0523	20.3133	16.4178	15.0185	22.3863	25.8352	15.527	16.3768	20.2199	20.3634	22.0775	26.561	13.3594	14.0858	10.1016	15.9613	9.82902	20.6468	23.8111	17.8366	17.3974	19.3547	12.5779	22.5461	13.9889
RP3166	NPC	HMDB0060499	C28H30N4O6	375.738	375.738	536.254	353.5	371.964	228.545	545.027	326.788	91.2523	309.862	276.328	435.026	114.275	690.192	353.139	820.963	146.685	314.623	556.116	485.588	308.142	439.333	513.152	559.446	563.745	424.333	531.991	1450.77	305.912	118.521	935.617	777.327	132.712	82.9868	105.665
TN2627	N-Acetylmuramate	HMDB0060493	C11H19NO8	462.763	462.763	316.099	14.1901	20.6668	12.7483	22.596	14.7746	16.6687	13.3147	12.0597	23.2995	20.3372	25.5793	29.7638	5.06325	18.9149	14.2377	20.6943	13.318	5.84383	10.9748	16.3874	14.4106	21.8827	8.54173	12.7622	21.111	19.8842	17.0119	26.8977	36.8479	28.4982	21.1604	16.163
RP1886	Chondroitin D-glucuronate	HMDB0060454	C16H27NO11	280.87	280.87	392.156	57.7936	46.7059	74.3075	86.2204	70.7199	67.7353	71.5175	67.5091	95.7759	80.3757	108	96.0983	84.9644	75.9703	87.0386	111.053	93.397	75.7669	86.7136	114.019	105.874	118.914	94.8556	86.7269	99.2977	100.751	98.9782	100.714	117.856	115.728	115.246	65.3275
TN82	Chloral hydrate	HMDB0060451	C2H3Cl3O2	1239.43	1239.43	164.928	149.014	148.015	124.11	131.789	132.765	133.155	133.156	126.047	123.142	125.625	142.246	146.282	194.959	155.3	187.689	177.619	214.783	218.741	210.433	217.754	219.589	215.849	218.739	229.6	235.774	237.296	235.327	235.144	241.383	233.112	222.154	141.187
RP3198	alpha-Fluoro-beta-ureidopropionic acid	HMDB0060435	C4H7FN2O3	138.627	138.627	189.007	133.011	142.065	123.4	108.286	111.946	117.755	130.409	177.363	165.359	73.6497	92.954	205.337	144.342	98.6094	76.3751	84.9305	110.638	187.536	226.458	131.264	78.598	65.0249	113.371	85.8568	111.972	105.044	137.522	108.741	191.976	103.869	96.3273	78.9055
RP2823	Aflatoxin B1exo-8,9-epoxide-GSH	HMDB0060431	C27H29N3O13S	89.0751	89.0751	618.14	9.57712	13.5946	44.935	21.3684	16.1831	19.9163	28.2433	20.2283	30.1596	26.7321	25.3566	20.6499	13.7831	47.0324	31.0502	28.952	28.0647	27.2784	32.4552	30.2993	31.1939	43.1263	18.151	20.05	30.3511	34.661	27.6523	33.576	18.4161	28.1317	21.6275	16.5474
TN1416	7,8-Dihydro-7-hydroxy-8-S-glutathionyl-benzo[a]pyrene	HMDB0060423	C30H29N3O7S	96.9434	96.9434	614.145	201.951	420.22	338.039	483.531	261.924	311.373	365.067	386.388	360.095	555.172	379.035	386.491	55.8693	515.515	463.187	393.935	399.44	326.187	338.008	362.076	226.951	528.123	237.007	247.656	340.993	322.633	265.446	234.557	158.921	346.522	121.795	219.515
TN1004	6-Thioinosine-5';-monophosphate	HMDB0060416	C10H13N4O7PS	118.327	118.327	387.013	144.704	99.1033	97.0867	78.6695	123.529	122.278	80.6176	78.9291	86.4298	62.0376	77.6426	96.2555	99.4052	67.6532	88.6513	65.0985	136.543	140.529	146.73	125.341	94.4365	111.898	108.072	110.302	102.904	103.907	134.181	140.2	158.66	85.8725	105.24	137.149
RP2242	6-Thioguanosine monophosphate	HMDB0060415	C10H14N5O7PS	75.1345	75.1345	362.032	114.836	268.362	247.694	135.157	75.1016	71.1782	114.937	104.644	80.4734	586.874	270.582	67.1644	70.5369	302.519	95.9151	68.1903	56.8691	48.7961	56.7618	220.079	83.9201	493.375	45.8538	49.4917	53.132	36.5165	41.7066	48.179	84.743	78.7306	63.917	43.8447
TN540	6-Methylthioguanosine monophosphate	HMDB0060413	C11H16N5O7PS	117.953	117.953	432.021	60.3035	54.2245	35.6059	49.9069	44.1252	49.6723	34.7112	43.0298	50.391	33.0085	35.7944	52.9154	33.1179	49.1297	42.259	46.7347	61.9797	55.2074	49.8074	47.5184	53.8318	54.2631	51.0505	63.7265	55.929	55.5986	64.9901	59.2318	82.8905	54.0814	51.4592	62.2436
RP2501	6-Mercaptopurine ribonucleoside triphosphate	HMDB0060411	C10H15N4O13P3S	68.6347	68.6347	546.95	30.2382	12.4035	18.0319	23.9388	21.7481	24.273	21.1699	21.0166	27.609	13.9863	20.4712	23.3895	27.9922	58.4425	21.2834	21.3007	24.3046	28.0568	21.877	24.8204	26.4026	16.8474	28.8803	29.8111	22.4636	35.9771	23.6981	22.1223	29.3053	29.9476	25.0404	22.0083
TN2057	6-Carboxy-5,6,7,8-tetrahydropterin	HMDB0060410	C7H9N5O3	75.0916	75.0916	234.059	38.5832	40.9885	35.8414	46.3605	21.4541	39.0947	26.0619	36.5662	22.4061	21.7911	28.2002	42.6835	16.8585	22.1587	20.4932	22.6731	42.6566	50.8939	31.1803	34.9568	29.7198	25.4085	40.3009	34.3988	28.6901	23.8165	28.4931	31.676	28.5683	28.9278	22.433	26.4928
RP2462	5';-Deoxy-5-fluorocytidine	HMDB0060405	C9H12FN3O4	74.661	74.661	228.079	37.4872	37.8288	55.2935	52.7367	58.8562	53.6268	54.0371	56.4267	46.3698	52.3882	47.6702	46.9509	44.1373	55.8318	53.1405	53.5338	54.9305	52.5833	45.415	69.8081	57.7373	65.5044	60.3933	58.7182	53.2849	62.1997	54.4943	56.7523	41.1689	60.3821	55.505	57.3502
RP2926	5,6-Dihydro-5-fluorouracil	HMDB0060402	C4H5FN2O2	242.247	242.247	170.997	13.3422	14.046	8.2634	14.7992	17.2349	17.1052	15.1384	10.0524	13.1774	5.08744	10.4881	13.8749	18.0118	6.67294	14.8523	7.95309	18.1901	33.091	28.9925	14.2532	10.4094	12.1446	15.4066	12.8566	12.1265	28.0191	9.58668	31.877	9.83918	19.0773	10.513	8.44558
TN2751	4,5-Dihydro-4-hydroxy-5-S-glutathionyl-benzo[a]pyrene	HMDB0060391	C30H29N3O7S	138.635	138.635	614.148	222.107	264.331	348.979	246.772	283.471	129.966	399.606	136.832	435.25	163.643	400.213	138.983	198.562	205.336	423.219	188.685	332.791	132.645	469.643	303.15	358.56	565.592	319.466	250.017	106.622	379.623	143.921	319.772	201.406	202.031	321.832	216.225
RP2507	4-Glutathionyl cyclophosphamide	HMDB0060387	C17H30Cl2N5O8PS	74.6463	74.6463	604.059	21.3113	130.293	133.874	62.8495	37.2934	13.7935	78.5694	81.6373	23.4252	63.6159	157.5	29.8894	45.4741	115.524	84.5792	29.9693	16.1832	12.927	29.724	121.979	62.3867	120.858	28.8653	48.4624	19.3095	12.7975	16.4766	18.8033	14.5975	66.0872	21.9539	73.1564
RP1367	4-(Methylnitrosamino)-1-(3-pyridyl)-1-butanol glucuronide	HMDB0060383	C16H23N3O8	620.295	620.295	368.144	120.419	96.4033	107.085	108.251	100.293	75.1365	90.8359	112.05	79.7323	96.8422	78.8257	62.8142	74.2668	86.3747	51.8247	82.7019	79.942	87.1704	82.9943	94.2144	88.0705	76.0439	66.3005	68.8258	81.6955	65.5772	59.1127	57.6401	90.5809	98.1247	88.951	67.2395
TN1565	3-Oxoadipyl-CoA	HMDB0060378	C27H42N7O20P3S	138.349	138.349	892.134	21.0423	22.7762	22.2895	22.8002	18.2678	15.0837	22.6853	13.5026	16.0308	18.9071	18.369	16.8725	18.3984	23.6746	18.2037	14.3039	15.9481	15.6816	17.2202	20.0374	23.1451	25.7719	17.0827	15.35	16.2515	11.396	11.7342	29.8858	14.6046	14.7068	12.2844	17.0006
TN1292	3-Hydroxy-5-methylhex-4-enoyl-CoA	HMDB0060373	C28H46N7O18P3S	135.385	135.385	858.158	14.5604	10.5642	21.9903	14.2366	23.7816	7.71331	19.6315	9.00362	20.8483	15.1954	20.1634	12.5179	15.3427	15.4465	26.691	10.8328	23.5023	12.6184	12.9473	17.5717	26.4633	30.8451	19.7997	24.6264	20.635	22.4661	13.7741	17.906	15.1623	15.2628	25.675	23.0411
RP2865	2,3-Dihydro-2-S-glutathionyl-3-hydroxy bromobenzene	HMDB0060358	C16H22BrN3O7S	234.971	234.971	502.027	3.71295	17.5988	23.5998	33.86	13.9782	5.16558	21.16	11.478	9.59177	22.0145	58.9925	11.5193	32.7845	34.1815	39.5454	25.3764	42.1418	3.94704	2.72119	10.452	42.1479	62.4011	21.4169	14.9537	35.5224	32.9302	9.49073	29.6523	6.40977	35.8997	32.7127	16.3116
TN1547	2-Chloromaleylacetate	HMDB0060347	C6H5ClO5	472.152	472.152	192.99	199.695	193.422	232.222	204.579	191.027	214.666	218.076	213.186	182.965	202.275	203.52	216.963	202.816	174.501	207.253	181.061	207.87	203.68	214.614	199.389	185.829	210.786	185.006	189.893	211.075	242.595	205.021	214.048	204.445	201.478	237.605	248.661
RP3448	2-(S-Glutathionyl)acetyl glutathione	HMDB0060343	C22H34N6O13S2	250.361	250.361	655.169	109.441	243.724	198.24	203.712	139.139	199.583	170.703	157.406	213.652	215.267	208.584	168.502	129.822	191.56	247.017	159.554	225.227	144.572	185.865	186.833	207.192	422.647	295.297	168.423	179.327	174.197	139.22	322.71	115.826	169.174	165.869	108.569
RP426	1-Methoxyphenanthrene	HMDB0060323	C15H12O	549.657	549.657	226.122	357.328	347.362	351.622	343.118	337.267	337.357	338.469	330.852	343.557	352.412	325.523	341.256	344.995	336.002	343.977	347.546	349.428	334.401	365.164	388.72	359.409	393.22	387.11	369.043	385.944	380.196	381.831	382.805	363.415	366.114	362.826	376.396
RP570	Aminochrome o-semiquinone	HMDB0060279	C8H8NO2	262.537	262.537	168.089	70.7489	59.6496	78.7238	85.4946	74.4541	70.3631	70.6571	75.4687	90.7823	88.2355	90.0218	78.8632	84.3455	83.3591	98.4744	93.0323	103.099	95.8326	93.1352	108.509	118.04	109.91	100.313	100.834	119.969	117.96	108.866	100.765	102.909	123.812	130.459	124.22
TN1103	1-Methylpyrrolinium	HMDB0060253	C5H10N	280.962	280.962	122.037	10.9495	3.71413	7.29746	3.49905	4.50881	7.03083	2.47882	3.24924	2.58968	3.60301	8.83572	12.0293	1.82954	4.71164	4.8551	6.35996	8.10875	13.5599	4.81884	9.1771	11.7419	7.33504	7.24777	19.7822	3.49583	6.77161	6.14802	7.94445	9.20228	8.87945	11.5903	16.5652
RP2949	iso-A2E(11-cis)	HMDB0060192	C42H58NO	736.751	736.751	609.477	9.0067	45.7308	11.1034	50.3973	28.3135	59.7583	76.1551	59.592	63.8794	62.2691	74.3904	40.466	48.9783	70.6398	53.9658	43.3326	37.9246	69.1547	76.065	81.6484	59.6687	69.5136	34.7262	55.3525	62.1139	51.0207	66.5525	64.8487	44.0889	35.8111	44.9174	27.0727
TN95	(2R)-2-Hydroxy-3-(phosphonatooxy)propanoate	HMDB0060180	C3H7O7P	402.449	402.449	168.99	37.7335	36.7229	33.8087	31.669	32.0897	32.1677	32.8599	32.0522	32.55	33.0943	31.2491	32.204	33.6183	30.8766	32.8537	30.8936	37.6829	35.2553	36.2854	36.7514	36.5613	35.9525	36.5365	41.0137	35.5502	38.3314	37.5617	38.977	37.8724	39.2923	38.207	38.5486
TN1745	3(S)-Hydroxy-4(R),8-dimethyl-nonanoyl-CoA	HMDB0060161	C32H56N7O18P3S	73.657	73.657	952.28	7.68699	403.772	174.106	52.4722	20.1901	14.2966	46.1707	67.2138	23.9501	916.328	463.182	39.5832	18.6555	655.399	211.036	35.1725	12.6395	4.58943	4.13403	213.098	39.0799	364.041	3.81889	33.4521	5.37502	3.458	9.57525	5.72932	10.2239	121.322	8.00398	143.305
RP18	Neocasomorphin (1-5)	HMDB0060144	C29H41N5O9	721.987	721.987	604.296	191.442	204.663	237.475	244.404	216.068	240.319	230.68	253.884	294.695	212.037	243.335	210.077	206.138	195.363	234.959	220.46	37.385	41.9328	31.4033	21.6245	20.4175	17.8349	17.2674	9.47434	29.4781	8.15904	7.68495	13.055	22.1299	11.1325	11.7454	8.80253
TN1740	rac-4-Hydroxy-4-O-(beta-D-glucuronide)-all-trans-retinyl acetate	HMDB0060141	C28H40O9	598.3	598.3	543.256	68.186	71.0884	26.9304	122.399	55.025	30.3344	85.1836	65.233	104.589	26.5841	87.507	42.8754	15.5272	74.7806	56.9417	86.3866	69.5351	94.0987	190.786	72.4217	65.3638	72.4021	124.797	50.6361	177.246	53.5244	54.1751	224.816	220.172	61.5244	26.4598	35.9993
TN2388	4-Hydroxy-17beta-estradiol-2-S-glutathione	HMDB0060139	C28H39N3O9S	880.413	880.413	576.236	26.0556	9.13414	31.7054	27.1323	32.7924	29.6723	27.9201	33.8001	16.5223	17.9256	13.1118	17.4276	8.91469	17.5056	14.2903	23.8046	20.816	25.2896	31.0735	30.5564	32.0795	26.8981	16.5385	25.3855	17.9319	22.9199	28.8178	9.08219	19.5566	14.4358	18.7968	9.49374
TN828	rac-5,6-Epoxy-retinoyl-beta-D-glucuronide	HMDB0060123	C26H36O9	798.881	798.881	457.228	161.039	106.47	149.03	137.045	140.898	123.447	131.023	139.289	112.134	137.101	106.451	77.0074	31.3856	87.2836	56.0127	85.5456	65.253	78.3643	70.7889	130.015	121.456	72.0875	76.7941	91.7044	77.9823	87.0385	103.533	55.2298	73.4656	87.455	63.8836	90.0373
RP2514	Dibenzo[a,l]pyrene	HMDB0060116	C24H14	76.6771	76.6771	325.101	92.2304	375.253	403.869	287.724	136.127	92.0666	226.688	208.024	102.685	819.372	366.741	148.459	110.141	469.13	243.408	147.422	95.4086	82.4896	84.0195	382.234	144.777	675.356	139.783	154.431	107.007	94.6098	84.0115	107.085	87.9369	208.577	128.489	226.08
TN269	24,25,26,27-Tetranor-23-oxo-hydroxyvitamin D3	HMDB0060114	C23H34O3	969.298	969.298	341.248	14.0573	9.10452	7.60356	10.2898	8.83157	10.3954	7.13148	8.41758	7.54448	7.6694	7.99403	8.92574	3.85305	5.8164	6.03723	18.4198	53.7989	56.2732	11.4397	34.9486	34.2531	49.3357	7.43707	6.18358	56.7786	68.5911	55.3343	61.4167	28.2615	54.0264	57.4349	13.5636
RP926	12,20-Dioxo-leukotriene B4	HMDB0060094	C20H28O5	276.443	276.443	366.225	78.3456	86.6822	76.0477	90.5384	84.138	79.1143	83.1584	78.1669	85.6185	92.2066	98.6441	92.0441	94.3351	86.817	89.7822	86.9046	85.2877	88.6896	91.6593	96.5039	98.5322	97.3424	97.7822	96.9844	93.2409	88.073	98.2835	96.9788	92.8373	103.33	100.228	97.5583
RP2605	5-S-Glutathionyl-aminochrome reduced	HMDB0060086	C18H24N4O8S	278.953	278.953	474.165	223.862	197.024	76.5159	360.551	35.3274	191.034	374.964	343.698	54.9622	275.11	159.075	279.631	48.3748	319.267	47.9507	84.4802	427.214	110.812	252.492	96.3718	262.259	381.47	368.093	421.953	252.498	33.3957	80.4478	148.205	364.499	233.255	174.107	264.051
RP3093	Thyrotropin releasing hormone	HMDB0060080	C16H22N6O4	503.769	503.769	363.177	171.191	422.872	95.1506	316.924	179.838	272.211	108.466	137.32	272.244	320.165	411.736	883.497	319.936	533.023	260.067	535.167	152.596	54.7879	110.303	108.568	204.924	199.04	110.742	161.809	387.201	281.897	286.693	239.992	468.333	302.605	200.245	179.118
RP2052	3';,5';-Diiodo-L-thyronine 4';-O-sulfate	HMDB0060075	C15H13I2NO7S	66.1372	66.1372	605.854	17.5771	13.9585	14.0918	13.4132	17.151	18.5187	22.7453	17.2869	14.6942	8.06147	15.3832	18.0177	19.3148	12.5266	19.2724	21.9615	23.2663	21.6441	30.3564	13.7422	15.9823	11.4227	24.8415	20.7313	27.5117	21.5318	16.4069	16.8559	23.3994	14.0374	13.8672	15.4235
TN407	CMP-N-trimethyl-2-aminoethylphosphonate	HMDB0060072	C14H27N4O10P2	273.44	273.44	495.105	106.399	211.438	173.067	196.107	151.372	92.5285	156.226	123.406	97.7972	139.875	86.6984	88.018	20.5994	97.884	66.0264	65.6004	42.8615	48.212	66.4519	107.422	81.8581	103.284	67.2953	56.0061	51.6714	56.858	43.0419	59.4793	36.5196	55.3226	32.6315	42.5627
TN647	Sphingosine 1-phosphate (d19:1-P)	HMDB0060062	C19H42NO5P	1164.2	1164.2	360.262	76.7347	55.9918	95.4827	86.1549	91.7091	82.7126	68.596	88.9862	76.6923	66.3504	57.4949	54.0645	26.4266	56.9573	43.162	57.2881	60.0826	74.9256	68.6457	75.1312	66.6025	43.931	59.9993	57.7146	55.2773	48.5725	60.4898	32.5583	44.7325	37.3753	31.9683	42.838
TN208	Sphingosine 1-phosphate (d16:1-P)	HMDB0060061	C16H34NO5P	1131.12	1131.12	316.204	4.48486	4.35008	3.16019	3.02591	1.89601	1.44121	1.37701	1.88446	1.25925	1.04962	0.525362	1.46104	1.71924	2.09724	7.72438	6.06855	13.5302	14.359	20.6278	13.1825	10.4312	7.48755	10.4427	15.1071	22.7766	16.6943	24.4119	11.9112	21.5293	17.2917	11.0355	13.5892
RP2779	20-HDoHE	HMDB0060048	C22H32O3	731.525	731.525	327.232	138.759	159.618	92.0675	186.311	84.4099	143.022	139.605	188.168	179.923	189.412	218.45	259.49	96.029	204.068	174.641	213.101	201.309	156.483	260.485	196.382	174.593	64.3425	187.607	206.599	283.861	179.684	165.985	188.689	299.123	40.8002	154.374	171.386
TN1326	13-HDoHE	HMDB0060043	C22H34O	1181.63	1181.63	337.247	52.7241	41.678	51.7999	18.1603	23.4986	19.8976	55.5512	35.9956	49.8285	16.0395	30.1618	22.0579	14.8358	49.736	35.4945	25.1823	44.3878	33.7826	42.3382	41.1891	31.4597	19.0276	17.0024	39.0127	40.8338	32.4123	46.413	10.8215	28.9308	24.7513	25.2641	27.9165
TN2347	11b-PGE2	HMDB0060041	C20H32O5	697.842	697.842	335.222	67.7948	34.0138	46.6278	53.2189	50.5294	49.6849	82.5607	57.6561	54.2454	31.5808	37.4267	41.9973	7.56693	35.5662	25.6269	27.5333	52.0438	43.1329	87.4044	51.577	35.0306	37.9124	43.5506	42.1372	33.7561	27.2068	30.4153	20.4208	33.6499	28.776	22.5551	30.5414
TN2295	11,14,17-Eicosatrienoic acid	HMDB0060039	C20H34O2	504.933	504.933	345.224	46.8696	45.7646	66.2169	96.4209	53.5393	43.5939	84.2592	40.9507	24.3528	10.0138	40.9755	15.5237	7.96109	12.3468	12.3512	24.4549	55.8071	107.232	711.252	87.4107	61.0861	52.4229	61.9988	56.2993	21.9545	13.4915	10.3665	22.1468	23.0911	13.859	11.1695	11.0956
RP3262	(beta-1-O-[N-(2-hydroxymethyl-3-chlorophenyl)anthraniloyl]-D-glucupyranuronic acid)	HMDB0060034	C20H20ClNO10	130.599	130.599	487.11	41.6626	59.1383	48.1821	51.8517	39.8679	29.718	19.4572	21.1869	25.9563	39.6315	35.3477	52.4779	60.8112	50.5459	60.5657	47.9924	51.1429	20.4264	27.7355	35.684	51.0911	94.353	54.3586	47.6703	34.962	22.0661	16.8611	41.6809	26.0813	44.0953	54.1054	47.9232
TN738	(beta-1-O-[N-(2-formyl-3-chlorophenyl)anthraniloyl]-D-glucupyranuronic acid)	HMDB0060032	C20H18ClNO9	122.161	122.161	416.05	135.573	115.436	113.027	118.284	117.682	101.174	97.8103	107.284	99.1981	98.7404	109.311	117.43	83.4223	107.426	97.7483	112.416	119.766	116.377	93.9122	131.043	120.47	137.987	133.22	126.264	142.901	130.008	147.586	141.141	119.713	162.622	119.681	150.117
TN1681	Vanilloylglycine	HMDB0060026	C10H11NO5	134.619	134.619	248.054	488.33	634.288	433.627	739.406	407.818	618.692	388.932	699.773	353.142	826.68	410.49	650.73	347.954	811.014	369.916	821.306	478.902	662.498	301.589	868.853	472.125	691.077	504.716	574.73	863.501	450.746	988.097	648.246	460.767	916.887	466.636	748.204
TN1889	Sinapinic acid-O-glucuronide isomer	HMDB0060019	C17H20O11	71.8672	71.8672	383.099	701.429	490.167	392.083	468.454	605.647	747.734	611.7	730.015	917.092	795.406	446.891	795.67	366.812	342.006	531.354	946.235	866.897	726.877	560.312	336.834	637.519	593.337	803.519	702.399	767.43	1004.4	946.444	880.837	932.703	711.809	793.956	557.631
TN1407	Pyrogallol-2-O-sulphate	HMDB0060018	C6H6O6S	483.595	483.595	207.001	73.4648	74.5163	69.3295	72.8525	71.7536	68.5421	71.0953	67.0729	65.1317	66.452	68.3402	75.6826	62.5532	68.9794	71.0735	65.3101	67.9778	71.3845	68.8258	73.065	62.7208	73.6255	66.0591	76.7313	58.7512	68.7688	74.2701	65.5951	72.8679	75.4792	77.7847	71.8304
TN1792	Phenol sulphate	HMDB0060015	C6H6O4S	479.728	479.728	196.988	63.2056	50.6589	50.8981	57.6322	48.0234	44.7216	43.6035	45.0415	44.4708	55.8776	45.3356	17.6052	51.7279	13.4701	51.0767	44.0731	54.628	50.7452	53.7677	46.2895	51.8311	57.1629	54.514	48.6082	50.6992	52.8666	55.3087	42.4538	21.6766	59.1342	57.8343	50.8403
RP2188	N-acetyl-S-(N-allylthiocarbamoyl)-L-cysteine	HMDB0060011	C9H14N2O3S2	77.4023	77.4023	301.008	46.5879	53.1986	35.6851	46.4766	37.6188	40.9086	46.1931	42.8602	38.7099	22.1876	30.214	47.804	33.2759	28.4634	32.523	34.0743	35.6892	24.089	26.778	37.1299	36.6779	30.241	44.4579	46.6853	38.013	32.5443	32.4396	36.9694	36.0729	36.0073	40.1288	37.6055
RP2650	Indole-3-carboxilic acid-O-sulphate	HMDB0060002	C9H7NO5S	122.134	122.134	259.039	41.2594	25.3249	46.365	32.5408	63.3244	48.2986	45.6977	46.1686	91.2797	59.8144	63.6614	33.7973	60.524	34.5319	56.4747	60.2343	38.1337	58.5428	50.7799	58.2491	51.0542	32.2399	41.6389	41.2245	60.089	79.2318	80.4974	44.9063	42.0028	62.5636	51.5608	45.995
RP2994	5-(3';-Hydroxyphenyl)-gamma-valerolactone-3';-O-glucuronide	HMDB0059991	C20H26O6	787.325	787.325	380.21	36.6645	153.604	50.2213	30.1923	40.1239	39.8881	41.8493	39.9858	46.0779	52.0075	45.0794	45.7934	49.4868	40.3858	57.5816	50.7201	43.3535	50.4806	53.9387	66.8984	51.5207	51.1602	75.7665	40.1384	61.0192	63.9176	51.8153	39.9563	59.353	28.2485	46.5857	43.8988
RP2913	4-Hydroxy-5-(dihydroxyphenyl)-valeric acid-O-methyl-O-sulphate	HMDB0059977	C12H16O9S	84.0924	84.0924	337.059	62.0081	73.0015	66.5897	78.1148	77.191	78.86	85.2801	79.939	67.3672	50.0555	78.37	72.9412	66.7918	54.5997	70.4032	78.7924	80.7366	57.6684	55.2751	69.2996	72.7041	57.5811	59.5967	111.199	73.0155	65.6335	63.2732	76.6685	71.6534	63.5078	64.0779	98.9514
RP2890	4-Hydroxy-5-(4';-hydroxyphenyl)-valeric acid-4';-O-sulphate	HMDB0059976	C11H14O7S	565.342	565.342	329.008	106.217	92.0054	99.5019	96.4419	86.3979	88.2713	76.5059	72.2184	84.2842	74.5596	77.9553	68.4017	68.9042	79.8524	72.8877	72.8007	73.9969	71.2663	79.0468	84.9087	71.2822	84.8126	84.3003	67.8772	85.01	87.4382	90.8488	96.3894	83.0536	93.3274	88.9925	82.7812
RP99	Rhodin G7	HMDB0059949	C34H34N4O7	899.344	899.344	611.249	114.382	25.3417	193.552	108.765	201.173	203.088	296.236	212.053	256.446	171.341	139.898	193.043	166.038	189.033	207.048	284.265	42.2362	39.3111	27.6288	24.7564	23.9069	11.3305	16.4348	13.236	8.9606	11.9449	7.95804	7.85338	5.37718	7.66111	6.66281	6.47797
RP1842	5-Pentyl-1,4-dioxan-2-one	HMDB0059936	C9H16O3	781.342	781.342	155.107	14.1493	39.3991	29.4447	30.71	38.1852	42.0035	31.8814	34.3267	40.8648	4.48894	27.4343	33.1748	34.6434	33.6465	27.3743	30.1257	41.3237	47.8941	39.6246	51.2938	51.3679	43.391	36.5741	48.0767	47.5842	41.0294	34.6478	43.6269	27.9973	34.8031	31.6858	31.9647
TN1919	3-(Carboxymethyl)-3-hydroxypentanedioic acid	HMDB0059932	C7H10O7	66.134	66.134	229.031	129.78	135.404	156.753	172.476	119.739	123.108	171.404	134.415	97.0319	131.002	108.685	98.8621	29.7449	129.687	98.7609	110.416	132.368	98.323	119.797	129.002	134.498	124.729	107.512	123.162	112.613	117.692	115.003	118.906	174.725	166.869	148.028	149.217
RP2666	2-tert-Butyl-4-hydroxyanisole	HMDB0059926	C11H16O2	510.81	510.81	203.104	136.936	205.874	135.366	279.264	220.961	230.299	168.315	133.462	335.974	385.293	404.732	474.464	344.729	410.032	320.781	373.962	150.263	44.7191	139.012	171.497	184.018	260.258	81.9461	125.821	329.668	299.04	280.011	396.328	496.114	411.75	332.395	291.077
RP692	Paracetamol sulfate	HMDB0059911	C8H9NO5S	667.38	667.38	269.982	51.8274	23.6524	37.8935	28.1393	39.3733	44.8939	45.0309	45.1678	45.0729	47.4371	39.8767	61.4117	50.1771	60.2675	46.2812	52.1646	91.2871	50.7851	74.7384	98.7416	60.9332	53.8224	81.3739	79.1138	61.2581	69.0489	78.2858	57.166	68.9212	59.342	71.5021	60.7301
RP1854	2,6-Diisopropylnaphthalene	HMDB0059902	C16H20	759.148	759.148	213.164	16.6564	87.8563	83.0435	106.251	128.095	198.446	151.963	103.314	115.756	204.992	180.438	248.148	164.195	238.7	202.47	348.948	115.128	75.353	80.5442	129.018	136.757	151.503	144.325	73.0023	93.995	164.411	171.437	108.326	265.453	134.782	189.366	127.968
RP1240	alpha-Methylstyrene	HMDB0059899	C9H10	76.8347	76.8347	119.084	131.389	140.146	138.413	146.625	152.436	150.3	130.877	169.102	189.148	138.665	264.06	158.83	182.824	130.666	192.015	166.637	166.287	213.743	255.52	154.329	143.606	150.258	181.413	181.785	201.093	259.994	200.915	321.523	312.29	203.359	189.763	172.349
RP3238	p-tert-Butylcyclohexanone	HMDB0059869	C10H18O	547.331	547.331	172.168	13.3471	10.5953	11.0402	11.8792	12.766	11.3164	13.4867	11.2036	10.9193	11.7696	13.0161	12.0519	10.7395	13.8457	13.7462	12.5594	10.1861	10.3013	12.9841	11.2986	10.89	13.6597	11.8635	13.2851	11.7723	11.5277	10.9719	11.3619	12.4979	9.46686	10.7421	12.1218
TN176	Gluten exorphin C	HMDB0059796	C29H57N5O12	376.557	376.557	632.398	67.9626	72.8029	60.4778	62.3556	58.3338	57.2141	56.5878	56.9341	56.1837	57.7597	61.8999	56.6852	52.0871	55.7966	51.7698	50.7123	42.43	47.5094	43.2616	49.8224	50.6545	50.0514	49.0182	49.0978	49.25	46.5987	48.2092	46.826	45.808	49.3515	50.1948	47.0248
TN1294	Hemorphin-4	HMDB0059788	C29H35N5O7	701.23	701.23	566.247	269.444	147.307	396.988	278.961	285.18	162.848	313.535	247.204	239.487	439.126	275.948	117.776	42.0394	385.188	151.969	235.593	4.16843	4.18372	4.54488	8.46693	345.816	5.714	5.15728	4.19961	5.61796	266.122	360.346	5.768	4.27288	415.778	309.861	298.719
TN2290	S-3-oxodecanoyl cysteamine	HMDB0059773	C12H23NO2S	299.459	299.459	228.142	25.967	34.5085	43.4701	42.0204	33.8429	19.372	28.9958	24.9576	21.4392	49.9719	37.1008	22.7094	5.39989	37.0858	29.1687	22.5326	25.749	25.1292	19.0425	55.8822	39.4769	44.8528	38.9252	35.0787	33.9787	39.5763	28.2228	33.2271	18.6325	42.1901	35.3961	41.71
RP1290	2-Hydroxynicotinic acid	HMDB0059710	C6H5NO3	180.977	180.977	122.023	153.407	176.969	214.944	260.094	113.045	161.812	203.997	212.492	170.619	200.172	167.49	224.517	171.694	306.893	175.191	208.654	310.84	208.144	99.0107	197.702	357.133	348.527	207.107	167.933	233.859	165.516	173.928	173.215	206.374	318.374	313.757	213.286
RP1605	Cadalene	HMDB0059698	C15H18	759.78	759.78	199.147	12.9758	70.8661	63.0396	58.0441	74.7723	139.098	106.881	67.8502	71.9343	118.009	105.961	133.973	94.395	141.367	120.342	211.132	69.8954	43.96	45.6137	75.8371	83.3681	97.3484	72.2101	46.6883	49.6463	77.2715	96.1519	60.5308	96.0164	70.7527	54.023	101.805
RP779	3-Methyl sulfolene	HMDB0059667	C5H8O2S	92.379	92.379	133.031	1006.91	822.349	1118.9	1069.93	926.667	840.624	882.18	906.827	1102.67	1173.13	1372.4	1243.37	1149.1	1149.08	1208.71	1188.36	1168.25	1128.29	1175.53	1302.55	1612.86	1599.38	1634.48	1333.26	1472.14	1390.6	1337.62	1342.55	1457.19	1989.15	1944.74	1583.6
RP2744	N(6)-(1,2-dicarboxyethyl)AMP	HMDB0059653	C14H18N5O11P	72.4355	72.4355	502.042	34.901	49.8183	50.1642	40.4154	43.656	27.9932	21.0141	27.9532	24.0599	23.1544	24.0001	29.1188	32.022	48.1908	26.1469	22.5497	29.0557	29.9976	29.0204	34.2712	30.8498	101.74	25.9002	35.1832	43.1454	32.4112	33.2695	34.1272	30.1698	33.5977	36.7739	40.2462
TN691	(6S)-6-beta-hydroxy-1,4,5,6-tetrahydronicotinamide-adenine dinucleotide	HMDB0059644	C21H31N7O15P2	277.669	277.669	684.141	592.259	931.334	444.917	500.891	379.715	435.594	452.137	479.45	442.065	288.131	490.626	620.353	102.669	403.751	317.243	398.504	397.661	364.58	330.338	289.224	313.912	371.32	333.426	329.233	276.851	288.747	243.638	338.691	287.983	238.685	137.617	166.897
TN621	3-(3,5-Diiodo-4-hydroxyphenyl)pyruvate	HMDB0059637	C9H6I2O4	1240.36	1240.36	414.826	7.13566	9.85221	4.86326	6.24671	6.47751	6.84301	4.95664	6.07957	5.32965	6.50161	6.9938	5.49378	6.88134	6.0049	8.82168	6.92424	10.5432	10.5197	8.5602	9.61203	8.75151	10.332	10.7341	8.45405	10.434	7.4975	10.6004	10.0669	10.9213	9.85184	7.01228	2.52006
TN161	3-(3,5-Diiodo-4-hydroxyphenyl)lactate	HMDB0059636	C9H8I2O4	1236.18	1236.18	434.873	264.591	316.388	202.965	237.017	263.636	224.966	232.254	213.449	204.267	220.802	257.054	274.929	469.342	270.43	413.881	383.675	550.761	569.868	541.908	530.13	519.828	533.102	519.113	581.141	583.734	606.491	587.317	617.74	643.191	583.158	519.873	145.457
TN1259	Lipoyl-AMP	HMDB0059635	C18H26N5O8PS2	257.42	257.42	536.114	21.683	32.2693	29.5059	37.1467	31.9735	24.0381	33.214	26.8028	64.6773	38.5908	50.4031	39.0272	8.16126	44.3953	45.1566	40.0593	43.8291	24.1532	25.4871	32.4255	28.4595	37.8568	23.4797	20.8661	28.8932	39.4536	30.9765	40.5517	38.2869	34.0077	20.6314	24.2667
TN2118	(E)-but-2-enoyl-CoA	HMDB0059627	C25H40N7O17P3S	102.02	102.02	800.116	14.5693	44.001	22.2606	28.8376	17.1448	27.795	16.2469	32.5214	21.0377	56.5739	19.0768	30.853	2.62028	47.0037	18.3465	33.2464	27.2529	28.9262	35.5291	28.1729	23.921	32.8509	16.6401	32.5491	29.3334	34.2235	27.8772	42.7873	31.2965	29.345	16.7544	30.4739
TN1714	5-(Methylthio)-2,3-dioxopentyl phosphate	HMDB0059620	C6H11O6PS	570.629	570.629	264.992	161.256	177.738	165.262	163.952	167.858	177.364	172.875	167.247	167.542	173.743	162.039	166.882	165.1	156.817	146.777	146.636	125.676	153.732	138.329	135.775	146.319	149.636	162.406	148.098	140.818	167.398	178.691	156.699	155.005	156.795	170.929	167.103
TN2451	Riboflavin cyclic-4';,5';-phosphate	HMDB0059614	C17H19N4O8P	96.8279	96.8279	403.078	67.7783	47.4121	76.5254	45.9478	78.8572	36.7894	67.0152	36.7444	78.2819	38.333	77.883	38.3166	64.1324	37.7029	78.1423	41.8324	51.4509	33.3313	38.6274	59.6095	102.033	57.7767	67.8285	54.8703	51.9315	55.7574	44.9903	76.2187	51.5624	59.1386	118.045	72.3793
TN2484	albendazole S-oxide	HMDB0059609	C12H15N3O3S	137.547	137.547	246.072	39.4803	36.2581	31.0238	31.6381	29.0313	33.0278	35.2048	30.7594	24.3994	45.5937	31.9671	32.9735	22.2173	37.9057	30.264	31.2736	32.8097	29.9722	31.0437	34.4483	34.6894	37.3709	31.3178	34.7227	40.2631	34.4354	33.4547	33.2132	33.9021	31.226	39.2757	31.5385
RP1370	apo-[3-methylcrotonoyl-CoA:carbon-dioxide ligase (ADP-forming)]	HMDB0059607	C7H15N3O2	653.894	653.894	196.105	115.976	108.702	106.307	98.9401	96.9112	103.436	107.459	103.222	103.804	112.186	111.147	100.64	129.396	115.043	122.977	123.41	117.978	114.286	130.025	118.857	117.195	122.623	121.141	132.786	117.847	118.36	115.634	111.808	106.426	103.49	117.361	117.776
TN2418	10';-Apo-beta-carotenal	HMDB0059605	C27H36O	387.803	387.803	359.274	9.57077	10.8098	9.61616	9.92604	10.1076	9.71878	10.0751	10.2024	10.7823	9.54611	9.19654	10.8103	10.1346	8.94172	9.14911	8.41298	10.1742	9.05112	9.92159	9.22682	9.38273	10.1805	10.7028	9.08129	9.55446	8.68328	8.99347	10.2356	10.4131	9.1784	9.95308	9.32932
TN2783	CDP-glycerol	HMDB0059599	C12H21N3O13P2	86.2246	86.2246	478.066	111.189	68.6783	126.38	82.299	117.587	72.5526	107.748	101.782	100.213	48.0724	94.7745	83.469	76.0285	65.6598	80.7838	90.6274	70.3145	73.9183	87.856	97.462	128.729	76.3147	112.771	89.2949	74.432	61.4017	63.4102	102.387	92.9907	87.4578	167.645	91.9052
RP2783	Perfluorooctanoic acid	HMDB0059587	C8HF15O2	76.5773	76.5773	414.977	135.197	89.9159	73.1482	134.168	125.417	124.687	130.354	141.762	117.755	21.944	84.5967	131.946	111.213	54.4124	83.0488	112.435	123.003	95.7488	82.6279	95.2373	145.986	55.9457	130.987	121.369	100.777	95.5244	104.508	118.253	115.175	99.917	106.573	85.5428
TN1536	DG(22:6n3/0:0/22:6n3)	HMDB0056386	C47H68O5	420.892	420.892	677.486	13.5524	15.7108	10.4258	8.74696	10.3938	12.6098	9.91109	12.1219	9.22796	8.09503	8.74586	9.67819	8.65331	8.34258	12.0068	10.6949	10.439	9.11493	9.33213	8.51878	11.3144	9.62365	6.20098	9.37497	9.42912	11.1205	9.61404	9.51428	10.2136	8.66351	9.11909	11.307
TN112	DG(22:5n6/0:0/22:5n6)	HMDB0056359	C47H72O5	387.563	387.563	755.5	78.1977	81.99	76.7742	75.1494	87.7082	82.3521	68.0106	69.2795	68.9383	66.5165	75.6211	64.5433	62.1769	66.8186	71.7843	67.6363	65.5501	64.7471	69.0029	64.2608	56.8103	57.8039	57.9371	55.5585	59.7454	58.8275	58.638	61.1386	62.1109	60.0707	64.0037	55.6735
RP1202	DG(22:2n6/0:0/22:5n3)	HMDB0056349	C47H78O5	736.609	736.609	705.584	0	0	0	0	0.638499	0	0	0	0	0	3.25303	0	0.422824	0	1.61426	20.8985	71.7924	83.871	89.6034	122.23	69.0579	85.8206	97.7307	92.4972	87.149	80.5431	103.173	58.0765	144.88	117.805	95.8552	115.116
RP619	DG(18:2n6/0:0/22:6n3)	HMDB0056295	C44H70O5	341.266	341.266	717.481	120.139	120.862	108.923	107.375	108.438	108.462	111.026	111.945	110.559	114.4	109.27	108.982	118.284	123.714	115.936	109.377	129.191	122.713	128.713	115.91	126.555	123.888	127.028	137.57	121.628	107.864	129.105	122.001	119.311	119.501	118.404	117.04
RP770	DG(18:2n6/0:0/20:5n3)	HMDB0056293	C42H68O5	792.044	792.044	653.515	64.1091	17.6146	69.9173	48.16	79.0199	50.8991	60.2778	49.7508	46.3246	70.3708	60.7293	31.7102	47.5409	84.9611	78.5578	39.5787	5.58825	13.6422	19.934	15.0501	11.1519	20.4508	8.43758	11.3861	38.3641	52.6083	49.0616	45.3729	61.5865	54.9467	46.8974	38.0671
RP608	DG(18:2n6/0:0/20:2n6)	HMDB0056284	C42H74O5	316.555	316.555	697.515	94.5852	97.7038	102.327	99.0255	97.7269	96.9778	97.8419	108.332	104.124	105.606	93.9616	105.735	108.508	100.066	100.155	99.7308	114.519	109.026	114.281	116.147	110.61	112.616	113.948	110.255	106.91	117.457	123.314	115.292	119.124	103.117	114.061	99.8644
RP70	DG(18:1n9/0:0/18:3n6)	HMDB0056203	C39H68O5	779.375	779.375	655.469	30.3116	130.065	110.67	149.275	132.112	153.104	136.866	145.873	160.318	156.631	149.463	118.781	179.536	146.869	164.59	118.02	44.0814	51.4665	49.2642	50.4152	39.8095	49.5124	47.0031	44.6695	34.197	27.2791	43.0091	20.2015	28.0013	31.8075	25.9569	32.2218
TN1507	DG(14:1n5/0:0/18:3n3)	HMDB0056150	C35H60O5	362.634	362.634	583.426	46.9225	50.5495	46.287	43.9848	46.4104	37.457	42.8544	42.5245	47.2235	45.1808	46.7507	39.6346	33.7392	43.7836	44.8849	45.3177	38.9676	38.6579	34.4417	38.0102	39.1257	40.9663	42.111	39.3118	41.1926	44.3722	41.1143	41.7379	44.5082	46.0335	48.2226	39.1018
RP66	DG(20:0/0:0/14:1n5)	HMDB0056065	C37H70O5	779.092	779.092	633.483	37.1092	133.668	126.989	144.792	138.247	126.689	160.296	142.513	145.216	130.397	136.354	133.033	137.819	128.081	117.899	107.379	66.6778	49.5282	63.3937	67.8162	45.5976	49.9858	30.6497	42.9633	33.7737	41.5077	28.3455	20.5649	12.3428	24.6238	29.7177	25.5993
TN365	DG(15:0/0:0/20:4n6)	HMDB0055999	C38H66O5	1073.49	1073.49	585.487	0.622411	0.705727	2.75624	1.20611	0.821015	0.779199	1.32706	1.33163	3.2993	1.63975	1.87263	12.0692	26.421	2.1827	24.7439	44.1418	1.31202	1.07476	1.50676	1.17826	1.3404	1.23613	0.562967	0.905008	0.817796	1.05588	1.0543	0.767939	0.870543	0.691244	0.51103	0.348041
TN958	DG(15:0/0:0/18:3n6)	HMDB0055996	C36H64O5	1182.88	1182.88	559.475	18.8575	19.0259	21.4862	21.4382	28.7427	26.2666	19.8201	28.3939	23.4734	17.1759	21.8301	16.4789	4.48654	16.6678	16.5744	28.5368	18.4513	13.9151	25.9074	24.5081	15.594	7.81303	14.6534	19.4531	22.9739	23.3605	7.44514	0.445781	13.5372	6.46657	9.75678	0.271532
TN388	DG(15:0/0:0/18:1n9)	HMDB0055990	C36H68O5	1074.2	1074.2	563.505	0	0	0	0.104323	0.308556	0	0.61714	0	0	0	0.0540014	0.0253797	61.9872	0.0387858	41.3995	29.295	0	0	0	0	0.0345485	0	0.0338071	0.0440678	0.0326733	0	0.0441271	0	0	0.0436028	0.0430262	0
TN1734	TG(22:6(4Z,7Z,10Z,13Z,16Z,19Z)/20:5(5Z,8Z,11Z,14Z,17Z)/o-18:0)	HMDB0055946	C63H102O5	65.8829	65.8829	977.734	7.62079	13.0834	10.4528	6.84721	12.9432	13.3909	7.17062	8.22921	9.73455	8.22203	8.93465	8.86323	9.06559	6.00125	6.53633	4.69774	12.9139	9.01799	11.2453	7.09339	10.4668	3.88006	8.60253	6.66403	4.00104	8.28555	11.5727	9.42137	11.3556	7.93651	7.23923	7.03121
TN1164	TG(22:6(4Z,7Z,10Z,13Z,16Z,19Z)/22:5(4Z,7Z,10Z,13Z,16Z)/22:6(4Z,7Z,10Z,13Z,16Z,19Z))	HMDB0055937	C69H100O6	64.9696	64.9696	989.731	6.56877	9.09898	4.74192	8.15385	10.0759	10.9301	8.28907	6.05126	7.19868	3.39196	8.33397	6.66573	4.79956	9.18046	7.94583	7.74904	8.42692	6.75375	7.22069	7.85851	5.3359	4.98039	4.99212	6.16396	8.53221	9.25234	5.39686	6.09272	6.13222	5.6255	4.84799	7.40077
RP2938	TG(22:6(4Z,7Z,10Z,13Z,16Z,19Z)/16:0/o-18:0)	HMDB0055898	C59H104O5	65.6183	65.6183	915.777	19.8418	17.977	9.45801	18.3798	17.5219	23.547	15.3567	12.0403	16.961	5.89909	8.12369	25.5989	14.9969	8.74237	18.3953	13.9285	18.0575	16.56	18.8941	12.6048	19.3715	4.78726	18.252	14.0115	18.4581	20.3948	21.8925	17.2271	20.1793	13.4589	12.5634	12.1822
TN1697	TG(22:6(4Z,7Z,10Z,13Z,16Z,19Z)/15:0/o-18:0)	HMDB0055896	C58H102O5	65.2108	65.2108	901.754	14.3294	13.1988	6.61611	9.17126	10.3472	12.9083	9.58158	9.50622	9.77241	6.26817	11.4886	7.05942	7.92528	9.82133	8.97374	11.2767	10.065	8.33495	11.7408	8.87286	9.98035	5.93109	10.8495	7.84945	10.005	14.4687	9.1916	8.77449	8.98841	7.14698	9.30933	8.64487
TN894	TG(22:5(7Z,10Z,13Z,16Z,19Z)/22:5(4Z,7Z,10Z,13Z,16Z)/22:6(4Z,7Z,10Z,13Z,16Z,19Z))	HMDB0055871	C69H102O6	64.5343	64.5343	991.741	8.96783	6.27373	4.69709	6.31695	8.62358	9.88823	8.25492	6.3922	8.43655	7.15166	5.86909	6.33145	6.97696	7.44856	8.98038	10.5238	7.42621	7.22644	9.16795	5.29552	5.7093	5.92633	5.02202	5.88305	4.42558	7.04696	6.21311	7.26442	7.3362	4.6783	5.69836	6.03193
TN1488	TG(22:5(7Z,10Z,13Z,16Z,19Z)/15:0/o-18:0)	HMDB0055809	C58H104O5	64.871	64.871	845.767	13.9731	13.3644	9.74125	8.4317	9.3911	13.6773	11.4934	11.5678	12.0607	7.45978	9.92148	10.9875	6.16789	11.2533	10.0871	9.88374	14.421	10.4636	11.9293	7.78349	6.46374	6.24566	9.505	9.71416	10.6384	10.487	9.89339	9.37458	7.36482	7.60562	4.00533	7.49575
TN983	TG(22:5(7Z,10Z,13Z,16Z,19Z)/15:0/22:6(4Z,7Z,10Z,13Z,16Z,19Z))	HMDB0055808	C62H98O6	64.5535	64.5535	921.743	10.0042	8.96674	7.8179	8.64845	11.7199	10.5169	5.7018	8.66552	9.86316	5.88251	6.35984	9.02902	5.76609	7.84094	10.3088	9.28067	8.83224	6.39042	10.5156	7.31283	8.33476	6.82604	11.7584	5.96751	7.52155	7.74269	7.46059	7.3033	8.83903	7.80649	6.49807	4.24575
TN1887	TG(20:5(5Z,8Z,11Z,14Z,17Z)/o-18:0/20:5(5Z,8Z,11Z,14Z,17Z))	HMDB0055801	C61H100O5	64.5211	64.5211	877.75	13.1707	6.6666	4.55691	6.82038	9.08558	9.06834	10.1949	9.03377	5.8664	5.63096	7.253	9.5742	7.24623	6.23801	8.45659	9.737	11.7316	8.33335	11.1106	7.96353	8.30073	6.33336	10.6822	6.85387	10.9676	8.87855	9.36717	7.19697	7.4158	6.3116	10.256	8.28043
TN1077	TG(20:5(5Z,8Z,11Z,14Z,17Z)/22:6(4Z,7Z,10Z,13Z,16Z,19Z)/o-18:0)	HMDB0055800	C63H102O5	65.1117	65.1117	903.753	8.66223	6.75697	5.82527	7.23987	6.41133	10.5198	8.16095	7.71344	12.7986	16.6045	9.96597	9.30339	7.27835	8.28976	7.23549	8.90055	7.39383	8.41631	8.42632	8.46282	7.43518	3.4342	7.56207	6.553	4.45166	10.2572	6.52623	10.2567	6.67565	5.35296	8.91817	3.59275
TN1106	TG(20:5(5Z,8Z,11Z,14Z,17Z)/22:6(4Z,7Z,10Z,13Z,16Z,19Z)/22:6(4Z,7Z,10Z,13Z,16Z,19Z))	HMDB0055799	C67H96O6	64.9634	64.9634	997.727	7.88826	8.27287	4.37221	12.1087	8.21696	9.0311	8.18041	6.61311	7.7966	10.139	7.79671	5.84275	5.07381	6.63444	9.93827	9.50112	5.57776	5.26599	7.85169	6.14556	4.35841	5.96879	7.59851	7.18256	5.64922	7.37808	9.10383	7.60215	8.03032	4.7463	8.36128	6.11578
TN1444	TG(20:5(5Z,8Z,11Z,14Z,17Z)/22:5(7Z,10Z,13Z,16Z,19Z)/22:6(4Z,7Z,10Z,13Z,16Z,19Z))	HMDB0055795	C67H98O6	64.6794	64.6794	981.733	10.8904	9.00377	4.61901	6.31544	11.537	11.5051	7.71841	8.58879	8.89337	5.8672	3.75556	9.29157	7.42927	5.05771	12.2405	10.5757	9.25043	7.99489	8.85756	7.54066	6.08582	4.73782	6.39639	6.31479	6.71525	8.73425	11.3923	7.75218	6.97006	7.95748	5.13578	7.39663
RP1917	TG(20:5(5Z,8Z,11Z,14Z,17Z)/20:4(8Z,11Z,14Z,17Z)/22:6(4Z,7Z,10Z,13Z,16Z,19Z))	HMDB0055787	C65H96O6	66.3852	66.3852	990.758	11.9663	9.54224	12.7602	12.8878	11.8369	17.6159	11.6969	18.1834	14.133	10.0827	13.2514	12.2764	16.8712	17.6508	12.1768	18.3958	19.9606	26.4253	19.2544	11.0767	11.3755	8.50388	22.4043	17.7362	19.7208	21.4853	17.8992	14.2421	20.7431	15.2469	19.218	17.5793
TN381	TG(20:5(5Z,8Z,11Z,14Z,17Z)/15:0/o-18:0)	HMDB0055692	C56H100O5	64.9696	64.9696	875.734	11.3173	12.6647	9.67785	12.6168	12.4684	14.2524	8.5394	11.549	10.6984	10.1299	9.97789	13.6319	7.61799	10.6291	9.72863	10.4339	10.0922	10.5691	9.03138	7.20146	8.72239	6.2867	9.42082	9.1043	7.17191	7.52903	8.86303	6.59241	6.50905	7.51293	5.68699	6.31504
TN1124	TG(20:4(8Z,11Z,14Z,17Z)/22:6(4Z,7Z,10Z,13Z,16Z,19Z)/20:4(8Z,11Z,14Z,17Z))	HMDB0055676	C65H98O6	64.6689	64.6689	957.736	5.98784	7.98794	3.81304	8.58244	5.81868	9.99202	6.31807	6.8611	10.285	5.04982	8.96828	8.40766	4.68861	7.81987	9.86006	6.4934	7.88248	6.71009	8.08593	4.78369	5.33815	5.30145	8.60812	5.50352	5.99862	8.42592	5.46719	3.89929	7.2147	7.71814	5.75701	7.49237
RP1567	TG(18:4(6Z,9Z,12Z,15Z)/20:1(11Z)/22:6(4Z,7Z,10Z,13Z,16Z,19Z))	HMDB0055427	C63H100O6	65.7703	65.7703	953.762	13.8472	8.22133	11.7439	10.3055	17.6965	14.0715	13.7376	13.954	10.4443	8.27517	12.6526	15.174	11.4281	6.43749	9.0843	20.6789	18.6999	23.6905	16.0752	17.1297	14.6339	7.14556	15.5141	17.139	20.4068	21.4358	20.2057	13.3389	16.6181	14.0682	18.9036	19.8141
RP2434	TG(18:4(6Z,9Z,12Z,15Z)/15:0/o-18:0)	HMDB0055368	C54H98O5	65.6523	65.6523	844.778	15.2788	13.3433	9.42934	20.4032	16.9025	15.8704	18.4028	17.1204	19.506	7.03436	12.6446	18.8647	11.5695	15.1571	16.1517	25.0068	21.2389	23.2581	29.6331	12.3637	19.6454	9.18764	17.0873	19.512	18.7857	21.8283	25.8899	17.7203	20.285	17.5967	13.164	14.6321
RP899	TG(18:3(9Z,12Z,15Z)/22:6(4Z,7Z,10Z,13Z,16Z,19Z)/18:4(6Z,9Z,12Z,15Z))	HMDB0055345	C61H92O6	343.359	343.359	959.657	10.0254	9.62528	20.1856	9.09583	19.9576	15.8941	21.0147	40.15	39.3846	28.9473	15.5785	43.076	43.0406	35.0328	53.8394	58.7382	43.8041	45.6487	49.9514	50.4685	38.0075	55.5463	50.3121	55.9878	52.3677	55.0317	51.4625	46.0949	50.1543	53.2253	53.4939	52.2469
TN2297	TG(18:3(9Z,12Z,15Z)/18:1(11Z)/22:6(4Z,7Z,10Z,13Z,16Z,19Z))	HMDB0055216	C61H98O6	64.3722	64.3722	927.757	6.76346	8.13309	6.49136	7.33583	4.82602	7.81735	8.52398	5.8918	10.4299	5.66249	9.09434	8.23592	5.85187	6.28662	9.31546	7.11098	5.60903	6.48207	8.94737	6.96195	8.57755	6.01687	9.24973	5.94254	7.4231	9.39902	7.69573	8.59938	10.6387	5.95031	4.4752	7.64097
TN1096	TG(22:4(7Z,10Z,13Z,16Z)/18:3(6Z,9Z,12Z)/22:6(4Z,7Z,10Z,13Z,16Z,19Z))	HMDB0054791	C65H100O6	64.7731	64.7731	941.737	7.93973	8.59761	4.62159	8.29639	10.8672	11.2497	5.07065	7.16958	8.27815	3.74006	5.25136	9.34549	7.90264	7.58786	7.26806	7.27881	9.07133	6.48726	7.64332	5.60641	9.63984	3.54567	5.49262	8.15785	7.83377	9.90042	9.45021	5.98974	5.45838	3.27184	3.54784	5.29703
RP1873	TG(22:4(7Z,10Z,13Z,16Z)/16:0/22:5(7Z,10Z,13Z,16Z,19Z))	HMDB0054664	C63H104O6	65.7608	65.7608	939.781	16.8633	8.90685	8.3536	11.4826	20.882	16.8117	15.9328	13.8299	22.1566	12.7316	11.1386	13.8982	13.1622	8.67183	8.2632	17.4715	24.9819	22.7821	15.3665	9.68147	16.453	8.11866	20.9509	14.4208	18.5208	20.3501	22.0117	11.0809	23.5778	18.9802	24.0801	14.8794
RP2315	TG(22:4(7Z,10Z,13Z,16Z)/15:0/o-18:0)	HMDB0054657	C58H106O5	65.9943	65.9943	921.764	20.0857	15.0465	13.7978	12.6022	19.8545	20.7405	15.7983	16.7392	13.8112	17.9946	12.8828	19.7009	14.0431	10.5394	9.27842	19.7059	15.2776	25.6316	23.7083	11.8158	18.062	7.77949	17.4955	20.5013	15.6149	18.3511	23.6593	19.1731	21.1088	22.947	13.8896	21.9512
TN993	TG(22:4(7Z,10Z,13Z,16Z)/15:0/22:6(4Z,7Z,10Z,13Z,16Z,19Z))	HMDB0054656	C62H100O6	65.2718	65.2718	963.736	10.2645	10.2224	7.69944	8.83123	10.0898	10.0723	10.6884	8.1134	9.24957	7.51201	9.30389	8.9678	7.0086	8.84727	8.03507	10.0435	9.63106	7.27204	7.35406	7.74899	7.97409	4.82734	10.429	6.67886	9.02654	9.77051	7.3126	8.93958	9.61176	7.06506	8.38928	5.36475
TN2362	TG(22:4(7Z,10Z,13Z,16Z)/15:0/22:4(7Z,10Z,13Z,16Z))	HMDB0054649	C62H104O6	65.7139	65.7139	983.738	9.67272	8.29952	4.94487	3.958	9.53942	11.9229	8.36007	6.37558	10.3524	6.54864	9.44813	12.9944	9.88079	5.62657	8.99896	7.21848	10.5611	12.4371	11.0439	5.40128	9.13636	6.27513	7.18149	10.0663	12.272	9.37401	7.51699	7.04368	8.5531	10.084	9.19082	5.90876
RP3153	TG(22:2(13Z,16Z)/15:0/22:6(4Z,7Z,10Z,13Z,16Z,19Z))	HMDB0054359	C62H104O6	65.7735	65.7735	967.768	12.4791	10.3655	7.67305	13.8034	14.8427	12.9502	13.6451	9.94175	16.189	8.97442	13.6461	14.8833	13.5238	9.18209	12.2887	13.5386	17.811	18.8643	13.2496	7.39812	13.2464	5.47051	16.7398	15.3354	14.143	18.2016	17.0134	13.7668	15.9257	15.4638	17.3686	17.703
TN1665	TG(22:2(13Z,16Z)/15:0/20:4(8Z,11Z,14Z,17Z))	HMDB0054356	C60H104O6	65.5486	65.5486	885.77	14.6081	13.6688	4.97246	13.0684	11.6797	15.6942	11.6958	10.6947	12.123	8.93664	8.65549	11.1371	9.27049	9.61433	11.5107	11.0771	13.2688	11.2769	13.6172	7.43574	8.1303	6.58903	9.19068	8.01792	8.45322	10.486	11.8038	11.9676	10.0916	9.02657	9.3054	10.4176
RP1338	TG(20:4(5Z,8Z,11Z,14Z)/22:6(4Z,7Z,10Z,13Z,16Z,19Z)/o-18:0)	HMDB0054330	C63H104O5	66.3475	66.3475	963.773	18.1478	8.92196	12.281	14.7156	15.9563	17.4978	10.645	16.3653	11.289	13.3567	10.3892	13.1559	14.9877	10.6261	13.381	12.0892	20.5522	23.6999	20.4538	15.2209	15.7153	3.2986	21.8336	15.6216	25.2398	15.0191	23.2569	17.245	17.6294	20.3139	24.3997	11.533
TN1081	TG(20:4(5Z,8Z,11Z,14Z)/18:3(9Z,12Z,15Z)/22:5(4Z,7Z,10Z,13Z,16Z))	HMDB0054268	C63H98O6	64.5479	64.5479	933.742	7.83446	14.193	6.2259	9.74664	14.3856	15.343	5.23887	6.85009	9.98578	3.73241	6.54493	7.02507	8.55024	7.43617	7.26949	6.52853	8.67038	7.41884	5.17813	6.64976	5.86181	4.98889	7.84381	6.1341	11.0609	5.7656	8.09341	5.13775	6.0433	7.09934	7.10975	7.28359
TN2129	TG(20:3n6/20:3(5Z,8Z,11Z)/22:6(4Z,7Z,10Z,13Z,16Z,19Z))	HMDB0053807	C65H102O6	64.4107	64.4107	943.742	8.44749	9.98745	8.02934	6.75552	6.54141	8.22563	8.43571	9.83341	6.21766	3.91371	8.94571	8.31969	7.59417	7.71287	11.3692	7.22705	8.58007	8.6893	8.98646	7.34554	7.27226	4.78161	6.11927	5.7649	8.63737	9.80262	8.17215	5.65993	7.29624	6.76405	6.29739	7.14447
TN1493	TG(20:2n6/22:6(4Z,7Z,10Z,13Z,16Z,19Z)/18:3(9Z,12Z,15Z))	HMDB0053634	C63H100O6	65.2819	65.2819	935.749	7.13273	8.8225	10.5437	7.2298	7.7728	8.02835	8.7951	7.66324	9.32797	5.07732	6.43859	8.31984	6.93991	6.41943	6.77096	7.53905	6.60416	9.48311	9.36861	7.99288	7.17042	5.80981	5.97177	5.25569	10.8766	6.1659	5.83208	4.68369	6.51088	9.66194	6.28146	5.78561
TN781	TG(20:2n6/18:4(6Z,9Z,12Z,15Z)/20:3n6)	HMDB0053577	C61H100O6	65.0665	65.0665	911.754	13.0703	8.2762	7.09123	8.3432	9.65565	11.5163	9.52272	9.67645	7.74959	6.6786	8.88354	8.27539	9.95212	5.23974	10.3365	8.96252	9.33874	11.0894	8.47323	7.05036	8.95718	4.47805	6.62078	5.44778	8.97499	8.49349	7.04429	5.53013	9.00767	5.66977	7.27176	5.65054
TN1751	TG(20:2n6/20:4(5Z,8Z,11Z,14Z)/20:4(5Z,8Z,11Z,14Z))	HMDB0053513	C63H102O6	65.0907	65.0907	993.731	8.38912	9.29731	5.2652	7.3864	5.88125	8.16638	7.40432	8.62432	7.11989	4.44583	7.86563	4.92876	7.41486	4.54669	10.32	8.2012	8.77835	7.00097	7.52734	5.26598	6.43787	5.65803	8.63685	8.84242	10.4459	5.41306	6.72887	8.22528	3.37786	4.00397	5.83054	9.3694
TN1560	TG(20:2n6/15:0/o-18:0)	HMDB0053289	C56H106O5	67.4541	67.4541	841.801	19.5061	25.3694	15.7217	9.18047	21.3126	30.5913	14.8464	12.3859	17.2306	4.6936	11.0852	20.2148	23.1097	10.69	24.96	16.3599	14.4906	17.9024	13.4206	9.63111	14.8503	4.90441	10.3754	14.0033	23.886	20.2002	17.612	17.7886	18.2186	17.8891	15.2516	12.8062
TN2301	TG(22:1(13Z)/14:0/o-18:0)	HMDB0051424	C57H110O5	66.2966	66.2966	857.822	13.2761	10.8701	9.74149	9.10789	17.6716	11.6328	10.9043	9.6288	10.4254	4.82613	8.53142	10.8414	9.47423	10.1289	14.8246	12.3129	10.0595	9.01453	11.4902	12.1229	7.81769	5.5793	8.56987	7.34777	11.0959	14.1719	13.3387	18.1118	13.1633	9.7402	14.0098	17.1574
TN1598	TG(20:3(5Z,8Z,11Z)/18:4(6Z,9Z,12Z,15Z)/o-18:0)	HMDB0051318	C59H102O5	65.3435	65.3435	913.759	10.0697	9.9039	8.27671	9.97311	10.9994	12.0016	14.4029	8.3614	10.3634	5.1438	6.26574	12.498	5.98077	6.25382	9.05047	6.38335	10.2192	9.05004	9.96484	8.73096	7.75419	7.00095	7.92358	6.15724	11.3509	9.12851	9.90437	12.9365	6.95758	6.84374	8.44843	5.84773
RP1629	TG(20:3(5Z,8Z,11Z)/20:3n6/22:6(4Z,7Z,10Z,13Z,16Z,19Z))	HMDB0051209	C65H102O6	66.1265	66.1265	961.768	12.2034	11.3657	9.49466	6.51763	11.8053	16.71	15.5459	12.9598	19.0038	8.21623	14.1457	16.9078	18.4618	13.0347	12.8161	18.8794	19.3261	19.5465	19.0236	18.0986	16.3187	6.20119	17.0508	15.9433	24.1588	19.7125	23.161	18.8006	16.6973	16.6309	19.6204	9.80235
TN939	TG(20:3(5Z,8Z,11Z)/20:3(5Z,8Z,11Z)/20:5(5Z,8Z,11Z,14Z,17Z))	HMDB0051099	C63H100O6	64.649	64.649	975.737	11.1765	8.67727	8.79744	7.56255	5.009	9.2573	8.22531	8.42445	9.47788	5.43632	4.85416	10.3516	5.03186	4.15578	9.9884	6.78364	8.47795	8.14605	8.63491	7.17486	6.65349	4.98602	6.77425	5.83772	6.37418	5.47722	4.97162	4.60201	5.45428	11.1875	5.95277	4.90462
RP1164	TG(20:3(5Z,8Z,11Z)/15:0/o-18:0)	HMDB0050904	C56H104O5	65.5139	65.5139	879.773	14.1996	10.872	12.8176	8.43093	10.977	18.624	13.8133	12.19	14.9164	3.43622	12.9239	14.2242	16.6541	9.67504	10.3783	16.6826	15.2649	27.0811	21.7431	14.1805	16.752	10.7374	18.3904	16.3733	17.6931	18.4659	19.3923	17.128	19.8602	17.1264	18.9564	17.8188
RP1228	TG(20:3(5Z,8Z,11Z)/15:0/20:2n6)	HMDB0050892	C58H102O6	65.7533	65.7533	895.778	19.0288	20.5952	12.1531	12.6154	15.502	14.0296	12.5045	14.4287	14.9764	6.46796	15.7155	19.7474	15.1573	6.41749	13.9055	14.4063	17.8407	21.743	21.4443	14.0332	22.7326	13.6995	20.7282	14.1799	22.2893	19.4556	23.0254	14.1912	22.2655	22.9868	23.298	16.9809
TN1537	TG(20:1(11Z)/18:1(11Z)/o-18:0)	HMDB0050489	C59H112O5	66.6432	66.6432	865.838	15.8677	11.9973	5.42476	7.08792	12.4011	14.9485	7.1733	7.20612	12.554	10.6195	10.0979	10.023	10.2652	8.40494	12.5888	10.8568	10.4826	8.42955	8.34653	7.50761	8.6947	5.19915	11.1533	8.52676	7.84128	9.59624	9.10854	13.2973	13.9725	9.10892	8.49858	6.38424
RP1313	TG(20:1(11Z)/15:0/o-18:0)	HMDB0050337	C56H108O5	65.9856	65.9856	899.782	11.3012	12.5729	10.0977	12.584	17.9627	16.9856	14.2179	14.8696	20.9163	7.46302	14.4206	12.4349	13.5727	9.03474	9.33221	13.2388	16.5546	16.5287	24.6443	9.37629	20.1687	16.818	19.9117	20.2398	24.808	20.7029	18.729	18.4647	20.1084	15.1953	10.8491	9.39162
TN1667	TG(18:1(9Z)/O-18:0/18:3(6Z,9Z,12Z))	HMDB0050287	C57H104O5	65.534	65.534	907.749	11.4348	10.8665	8.93329	14.5946	12.3074	9.54834	9.79901	11.317	7.84069	6.56176	7.42043	9.98474	8.21461	8.18203	9.87083	11.4287	13.0082	10.1134	14.5081	13.8266	8.43813	10.8041	9.6866	9.45786	11.7871	13.2648	8.89553	13.5094	9.79815	7.9797	8.95899	6.43079
RP1276	TG(18:1(9Z)/18:2(9Z,12Z)/o-18:0)	HMDB0050020	C57H106O5	66.4353	66.4353	888.838	17.6949	17.3661	11.5207	12.4902	23.1408	22.6961	14.1167	14.6411	15.1951	15.5154	9.83598	15.2167	22.8577	14.569	11.9383	16.7992	20.0919	19.5358	22.0253	14.0187	23.7509	7.49237	19.4629	20.1523	16.8905	20.3859	27.8408	22.5075	23.0046	16.6056	26.1096	25.1773
TN2365	TG(18:1(9Z)/18:2(9Z,12Z)/20:3n6)	HMDB0050009	C59H102O6	65.5481	65.5481	929.758	10.1915	6.90683	5.25293	9.62399	9.8241	6.99655	7.69775	10.495	10.4838	8.21887	5.91595	14.0758	8.11479	6.94279	7.05261	8.30282	9.13363	8.38197	11.0561	8.34746	9.31865	7.55217	12.1008	8.55298	10.4729	11.1508	9.47	11.6677	11.1492	4.44219	9.19635	6.44075
TN2292	TG(18:1(9Z)/18:2(9Z,12Z)/20:2n6)	HMDB0050008	C59H104O6	64.7634	64.7634	947.738	12.0643	8.96982	6.84834	8.91636	5.607	8.20975	5.77033	7.41161	8.90269	5.3303	6.35587	11.5113	7.24089	9.44176	9.32255	10.7202	8.60635	7.03612	11.5839	5.52825	8.7051	4.6918	5.26248	7.65287	11.3435	7.02651	9.80285	6.26516	10.75	8.51603	7.35764	5.16581
RP1811	TG(18:1(9Z)/16:1(9Z)/20:1(11Z))	HMDB0049862	C57H104O6	65.5543	65.5543	907.774	13.548	7.21259	9.31886	10.7804	10.8802	17.3735	10.7183	15.639	18.3847	5.37983	15.8576	11.5523	14.5416	11.8893	11.9424	18.9658	19.0772	14.7777	14.6955	10.7822	16.7728	8.53123	17.3233	11.2532	21.8784	17.9276	18.8107	19.2796	19.269	16.7635	24.691	16.901
RP2204	TG(18:1(11Z)/18:4(6Z,9Z,12Z,15Z)/o-18:0)	HMDB0049596	C57H102O5	66.3325	66.3325	889.762	24.3513	9.28886	14.5498	15.2034	19.1143	21.9566	14.3913	21.6608	17.2173	7.67956	11.5521	18.4035	15.7519	8.89354	15.5725	20.7019	19.2573	29.7978	25.3021	14.3683	23.7709	8.40668	20.4284	24.2217	21.9429	20.5508	25.6844	22.5593	23.1904	9.25171	13.9899	14.5964
TN1742	TG(18:1(11Z)/14:0/24:1(15Z))	HMDB0049077	C59H110O6	65.9532	65.9532	897.83	10.983	13.355	5.3341	9.509	15.1457	13.4776	8.27484	7.53986	10.8726	3.16526	7.37138	10.243	7.4864	8.2739	10.2534	10.4675	9.10843	5.21423	13.1726	8.26238	9.46424	2.66801	6.06364	9.41134	9.90063	8.97703	10.3988	10.6117	9.98055	11.5477	6.64414	9.23238
TN2665	TG(16:1(9Z)/O-18:0/20:4(5Z,8Z,11Z,14Z))	HMDB0049062	C57H102O5	64.7203	64.7203	889.752	11.1207	7.14088	6.5437	9.20188	8.52726	8.97685	7.1548	8.80779	7.02546	5.20733	6.81651	8.33676	5.38111	8.44971	8.26162	8.84405	11.8599	8.15845	8.59446	9.85659	8.91979	4.08865	6.10273	9.91545	6.50266	9.37306	7.27878	12.8943	8.68609	5.12555	3.43628	6.2234
TN1816	TG(16:1(9Z)/22:6(4Z,7Z,10Z,13Z,16Z,19Z)/o-18:0)	HMDB0049050	C59H102O5	64.7731	64.7731	855.76	9.44417	7.10732	10.4268	5.54798	11.0573	9.78627	8.13333	9.75393	12.5829	3.74642	8.64637	10.194	5.59067	6.18658	10.9718	9.33208	9.34222	10.1109	9.26113	6.44689	8.41518	7.16392	5.37543	7.60618	12.4409	7.47666	11.5537	4.46029	5.65669	9.16577	9.97483	10.0929
RP1912	TG(16:1(9Z)/22:4(7Z,10Z,13Z,16Z)/o-18:0)	HMDB0048896	C59H106O5	65.8848	65.8848	933.767	15.9514	7.81452	12.3941	14.2267	16.4544	15.705	14.9212	13.7816	14.8574	7.56351	6.32738	13.3838	14.677	5.86356	13.6489	16.0101	19.978	19.9627	22.3842	10.6738	18.0824	10.0406	22.9529	9.66507	18.6112	21.1387	12.8025	15.0414	17.5466	15.0785	17.2785	9.55889
RP2492	TG(16:1(9Z)/20:3n6/18:1(11Z))	HMDB0048810	C57H100O6	66.4097	66.4097	903.738	21.7713	14.9953	17.8924	13.5069	22.5179	36.0869	22.2138	21.1502	23.7541	12.2092	15.7698	25.9267	18.4078	10.7577	16.3818	29.7504	29.3054	27.4774	29.8595	19.3605	20.6864	14.2767	30.2746	21.6591	25.6699	25.3415	21.8308	28.67	24.9885	24.8778	18.6853	26.5962
TN2217	TG(14:1(9Z)/18:1(11Z)/22:2(13Z,16Z))	HMDB0047944	C57H102O6	64.5211	64.5211	905.75	6.21779	9.36354	6.70664	9.75215	5.99909	6.46104	8.92162	5.43119	11.2436	5.10663	5.86721	9.74018	5.36179	6.53221	10.7896	10.5936	5.10925	10.1408	8.623	5.63295	5.83948	5.62082	7.53353	6.72829	8.69504	9.18413	6.30922	10.3289	9.7454	7.59817	6.94175	5.47879
RP1931	TG(14:1(9Z)/20:0/o-18:0)	HMDB0047838	C55H106O5	65.5574	65.5574	885.768	13.6806	7.83138	12.5383	14.5981	12.8993	22.6199	13.4435	16.0435	17.025	7.56995	12.1703	15.2992	11.9233	5.71039	11.534	17.7208	14.1351	19.9606	22.026	17.8163	20.0109	8.35569	21.5759	12.4622	14.2146	16.5528	18.1172	13.2162	21.4869	11.2001	15.3405	15.7789
TN2393	TG(22:0/16:0/14:1(9Z))	HMDB0046308	C55H104O6	66.283	66.283	843.787	14.0567	12.8812	10.8806	8.7624	12.9335	17.7597	10.2839	8.95021	11.3032	3.04602	14.3106	11.5873	10.8742	12.0706	9.95708	14.2876	8.65468	14.5584	10.7797	7.67745	10.9397	4.76185	10.4533	10.1882	13.288	14.5741	8.17687	12.1443	11.5224	12.0124	15.4068	11.6293
TN1826	TG(20:0/O-18:0/14:1(9Z))	HMDB0046234	C55H106O5	65.3807	65.3807	869.793	11.4145	12.0849	9.74452	14.0547	7.9932	13.178	10.2452	11.2337	11.528	8.06064	11.6018	9.9591	13.0839	7.1021	11.2233	11.2573	12.1976	12.688	13.6825	10.3237	10.6538	12.0791	12.5798	9.666	9.31449	6.28248	9.15325	10.7095	8.6049	7.63519	9.60888	7.12082
TN2527	TG(20:0/20:5(5Z,8Z,11Z,14Z,17Z)/18:3(9Z,12Z,15Z))	HMDB0046172	C61H102O6	64.7203	64.7203	969.734	7.21191	6.23261	6.9042	6.44248	7.73421	10.0126	4.19069	9.52161	10.4839	4.59561	8.40519	10.4934	4.19572	3.91403	6.71252	7.04016	10.6926	5.47169	6.59647	8.59926	8.07498	5.50151	5.18559	9.19233	7.37872	6.10717	7.22057	6.63356	7.57484	4.17751	8.32617	5.33403
TN1690	TG(20:0/15:0/o-18:0)	HMDB0045528	C56H110O5	68.7106	68.7106	863.855	15.3437	19.7933	9.7041	8.65332	15.7385	23.239	11.8656	10.0636	14.209	10.0054	12.7652	23.1596	16.8486	6.67628	15.8508	15.3917	10.0979	17.1518	11.5151	8.94055	9.98993	4.42116	13.6195	14.1983	16.7425	17.007	18.0413	16.5495	12.9319	10.8869	15.0771	10.8828
TN2602	TG(20:0/14:0/18:1(11Z))	HMDB0045482	C55H104O6	65.3505	65.3505	861.794	9.09963	12.0738	7.75509	9.71552	10.6501	11.4009	8.14953	9.72043	9.2203	7.49361	8.55747	10.6803	9.50936	8.72042	9.39843	11.2762	12.3251	7.93449	15.7831	10.6161	7.32029	6.58757	11.4991	9.12406	12.3278	8.09481	8.04916	11.2466	8.27301	9.01377	10.7609	5.88888
RP1355	TG(18:0/18:1(11Z)/20:3n6)	HMDB0044926	C59H106O6	66.2394	66.2394	928.828	17.155	17.0799	12.2647	15.6212	15.9358	15.7951	12.8491	12.29	12.6686	15.6405	5.17697	13.3894	11.6728	14.3837	12.8952	13.4589	23.4266	21.857	20.2544	12.3263	23.3741	12.1725	15.4219	12.1459	18.7489	19.7523	23.5938	17.0267	17.2485	15.5532	21.6161	14.8417
TN2383	TG(18:0/16:0/22:1(13Z))	HMDB0044732	C59H112O6	66.4963	66.4963	881.844	10.7606	13.6993	8.52513	8.24463	9.29714	15.2556	7.7559	9.59071	12.9074	4.34743	10.1383	13.6979	10.1321	6.21248	10.3601	9.98776	8.39425	13.1391	6.24325	7.54907	9.40525	5.59159	9.91036	9.80822	10.9185	12.49	12.8541	12.9207	7.62842	10.0319	10.3026	9.17335
RP2795	TG(18:0/15:0/o-18:0)	HMDB0044721	C54H106O5	65.7458	65.7458	857.79	17.2192	8.23334	12.1774	10.3529	16.4747	19.1077	19.1969	17.7194	17.6591	33.8633	14.6065	19.5222	16.1253	13.702	12.2516	15.586	19.4018	18.9867	20.2945	14.4291	19.092	14.1897	18.1239	18.9085	19.443	18.312	21.8213	17.2573	25.6941	17.6939	22.7431	10.3493
TN1554	TG(16:0/22:6(4Z,7Z,10Z,13Z,16Z,19Z)/O-18:0)	HMDB0044640	C59H104O5	65.1234	65.1234	931.758	11.1095	6.20573	8.30322	7.62481	7.3858	10.4631	7.4431	7.94848	9.0311	8.13572	7.7525	5.7206	5.12759	9.07338	8.69819	7.39349	8.10504	7.47089	9.67747	5.51825	7.08828	5.64581	7.66708	7.35487	7.99692	7.70025	7.10448	4.49256	11.6949	7.65697	4.04573	7.17088
RP2089	TG(16:0/20:4(5Z,8Z,11Z,14Z)/o-18:0)	HMDB0044388	C57H104O5	65.6953	65.6953	891.774	20.159	16.0222	8.42818	14.1907	13.5893	14.0065	15.5619	15.4159	15.2292	9.74424	14.9352	18.8171	14.3924	4.3443	10.648	15.9607	11.9602	21.4996	22.157	8.9897	17.5672	6.14124	19.3852	13.8416	20.2509	22.3317	26.1428	16.4478	19.0702	11.3292	17.7685	15.2224
RP2304	TG(16:0/16:0/o-18:0)	HMDB0043912	C53H104O5	65.4388	65.4388	803.781	18.0829	12.0426	11.297	13.5596	14.2188	21.3706	11.6495	13.8978	17.1721	12.73	14.8505	15.565	12.8577	9.41517	12.3623	12.9529	17.6424	17.9922	19.1712	13.8259	14.7035	5.76095	17.9324	14.9832	15.4713	22.736	21.97	16.2113	19.9678	17.6314	24.5875	10.2469
TN2258	TG(15:0/o-18:0/20:1(11Z))	HMDB0043811	C56H108O5	65.5118	65.5118	899.778	10.8671	8.64267	5.93918	7.29846	8.21685	9.84216	6.57806	8.56427	6.97615	4.92934	6.89093	9.08907	8.16867	5.23102	11.5573	8.93083	9.6869	8.88828	8.54356	8.25297	3.61174	5.12206	8.18704	8.03949	10.6871	10.2044	6.41995	8.33258	8.16226	7.23511	7.77831	7.30254
TN1361	TG(15:0/22:6(4Z,7Z,10Z,13Z,16Z,19Z)/22:6(4Z,7Z,10Z,13Z,16Z,19Z))	HMDB0043799	C62H96O6	64.4993	64.4993	937.727	9.17784	9.14134	9.49304	7.60466	10.0644	8.34747	8.42726	11.1792	6.19871	5.87621	5.53371	8.79599	7.84623	8.58176	7.82531	12.9397	8.30303	8.57929	7.62389	6.36458	6.66208	7.65754	6.34246	10.6938	6.61191	10.1922	8.89789	8.81503	10.2256	5.11448	6.51679	7.17371
TN2314	TG(15:0/22:6(4Z,7Z,10Z,13Z,16Z,19Z)/22:5(4Z,7Z,10Z,13Z,16Z))	HMDB0043793	C62H98O6	65.6198	65.6198	939.745	7.26953	9.70747	6.35832	8.8031	7.70968	11.6421	8.01374	8.2147	10.7098	11.6156	5.43582	9.67228	8.48963	8.68161	6.09705	8.23535	10.4265	12.4241	11.3395	6.94054	9.5315	5.34419	9.21672	10.1063	13.1612	7.70636	11.8327	4.77603	9.23343	6.23721	8.57301	6.18961
TN2686	TG(15:0/22:6(4Z,7Z,10Z,13Z,16Z,19Z)/20:0)	HMDB0043775	C60H104O6	64.4426	64.4426	959.743	9.11467	7.21553	4.62904	5.90109	7.24084	9.13644	10.4524	8.70116	9.70506	6.09645	7.48084	9.79315	6.4785	5.72783	7.1156	8.05927	9.76764	7.63482	6.08049	7.42358	8.99731	4.95687	7.83786	5.63434	9.99249	7.83283	10.8675	5.0911	10.2939	6.30021	6.79345	7.5231
TN1160	TG(15:0/18:3(9Z,12Z,15Z)/22:2(13Z,16Z))	HMDB0043646	C58H102O6	65.2007	65.2007	917.757	11.5534	14.0767	7.55674	10.3434	6.57464	11.9153	8.35394	8.47467	8.24182	5.52927	5.63616	8.2133	6.63429	9.29771	7.68924	9.30149	9.51114	8.52817	10.8773	7.82466	5.80641	6.85736	4.13935	8.52573	10.2902	8.76201	7.63873	5.63265	6.79533	8.91021	5.95749	9.24864
RP2770	TG(15:0/22:4(7Z,10Z,13Z,16Z)/22:5(4Z,7Z,10Z,13Z,16Z))	HMDB0043590	C62H102O6	66.3378	66.3378	925.768	24.2704	17.2262	14.4315	15.5907	17.5906	24.3621	18.678	14.3237	16.9913	9.13261	16.0682	16.9197	21.9378	10.6491	20.1988	20.7175	19.4488	24.936	31.9451	13.2259	19.5664	10.5535	22.9416	19.412	22.9003	15.0757	19.7299	20.2122	18.6402	19.5966	21.9973	12.805
TN2372	TG(15:0/22:2(13Z,16Z)/o-18:0)	HMDB0043568	C58H110O5	64.5606	64.5606	851.812	6.65328	5.06084	6.49091	4.60664	10.5875	7.13194	10.441	12.1373	8.66973	4.5474	4.65109	8.36386	4.34189	7.86521	7.27619	9.77298	8.92809	6.36035	6.96167	6.44237	7.65246	7.94495	10.0401	6.82084	8.99143	12.0553	6.36742	5.19674	6.68209	6.99078	4.60136	5.9516
RP2234	TG(15:0/20:3n6/22:6(4Z,7Z,10Z,13Z,16Z,19Z))	HMDB0043509	C60H98O6	65.8549	65.8549	932.767	21.8525	16.2	11.7907	14.4871	21.5489	25.3093	16.5116	17.5978	20.3106	6.04558	11.087	24.3225	20.1488	11.1892	18.6587	19.7269	19.802	19.4892	19.9009	12.4444	24.003	8.11559	21.8258	21.4851	21.3159	20.3083	20.1056	20.4407	32.2229	19.345	27.5887	18.2938
TN2533	TG(15:0/20:3n6/18:0)	HMDB0043484	C56H102O6	64.9484	64.9484	893.753	6.83145	5.58323	5.39087	9.11697	9.5035	7.70287	6.57994	10.2744	9.31098	3.86569	6.39495	8.61994	8.76406	8.0076	7.78642	10.934	8.71911	6.78158	7.55294	6.31816	8.95104	5.53833	10.8536	10.4886	10.3504	7.5529	5.54671	11.0205	7.541	9.69843	10.0831	7.51181
TN2266	TG(15:0/20:1(11Z)/o-18:0)	HMDB0043307	C56H108O5	67.8701	67.8701	825.801	23.3846	25.1886	12.5877	11.8186	30.6375	29.5546	20.8873	15.8932	25.8352	4.76453	21.9528	26.172	18.8627	11.4598	19.1027	20.5974	14.5227	29.0314	13.5925	16.9476	16.6443	12.5766	23.1454	19.7043	33.0616	29.0707	28.8335	19.6736	20.0648	19.3783	20.7557	16.061
TN1127	TG(15:0/18:1(9Z)/o-18:0)	HMDB0043278	C54H104O5	65.0548	65.0548	815.771	16.4455	11.4417	8.11001	8.35368	9.4619	11.2988	11.616	7.04458	10.3037	6.45309	6.57523	10.5884	5.30731	7.89916	8.00436	12.2871	10.4996	9.33297	10.5306	12.458	6.19951	6.1728	7.28327	5.95756	5.4178	8.55999	8.36384	8.99711	9.03633	8.93606	8.03129	5.4056
TN1790	TG(15:0/18:1(9Z)/20:2n6)	HMDB0043266	C56H102O6	65.2108	65.2108	853.771	12.6061	12.3724	8.53659	8.73921	13.9944	10.5006	7.37602	11.3667	10.1421	5.72955	7.07527	11.5926	10.4974	8.99006	12.1378	9.51902	11.5971	12.1578	8.84945	6.69901	9.53384	6.68642	7.08015	11.0326	9.45546	11.2804	14.2698	12.3028	10.5076	8.78576	8.27405	5.81115
TN2680	TG(15:0/18:1(9Z)/22:0)	HMDB0043254	C58H110O6	64.6748	64.6748	867.819	9.79286	8.9648	7.99464	8.55058	10.5001	5.90278	11.5033	8.64582	9.3649	3.84085	5.16001	6.11261	4.94079	8.55976	7.43552	8.65215	8.7847	6.03595	10.6361	4.71361	10.4468	4.39472	6.13896	7.80198	8.62783	8.10404	13.3844	10.7034	7.23695	6.91502	7.29674	9.4987
RP2370	TG(15:0/18:1(11Z)/20:4(5Z,8Z,11Z,14Z))	HMDB0043239	C56H98O6	65.4745	65.4745	884.769	20.3869	9.04593	7.96226	11.8196	16.2093	18.0076	19.0139	18.512	16.0584	10.3797	16.4257	15.6734	16.4151	12.168	11.5414	22.252	17.6723	14.2327	21.1283	9.60756	16.1706	8.08519	15.0909	16.0025	17.1354	20.0985	18.7817	20.8195	20.2035	19.5872	25.0762	14.2249
TN1923	TG(15:0/18:0/20:4(5Z,8Z,11Z,14Z))	HMDB0043065	C56H100O6	65.0665	65.0665	891.74	12.0863	8.4453	5.41471	10.3103	10.7968	12.0179	9.64131	10.8461	10.196	7.13404	7.06658	12.5548	11.836	5.42954	10.6775	7.59719	12.3462	10.0097	10.9981	7.98452	6.83948	6.45767	8.57521	10.4908	5.51574	9.8861	7.28189	10.8548	12.3178	7.49882	7.86332	6.48821
RP2356	TG(15:0/16:0/20:3(5Z,8Z,11Z))	HMDB0043029	C54H98O6	66.3483	66.3483	860.768	19.5695	11.9609	18.1657	21.397	17.2484	18.902	25.1097	19.3397	20.1476	3.3991	13.1737	22.7671	17.219	13.5095	20.4331	26.8918	29.0187	24.4382	29.9826	13.6972	28.6545	11.485	20.121	19.9544	30.8066	21.0932	21.1466	19.6665	27.8617	24.3348	17.0556	14.7557
RP2400	TG(14:0/o-18:0/22:0)	HMDB0042936	C57H112O5	66.3712	66.3712	859.847	15.96	23.0734	13.1367	14.6266	26.139	24.7152	11.8115	10.4361	23.9038	8.28259	11.3632	23.073	30.5028	14.382	23.8972	12.6669	17.1475	25.9873	17.6877	19.2853	16.8397	10.2364	19.1072	24.6661	14.4006	26.748	30.4485	26.8533	16.8746	31.6554	30.1921	16.4077
TN1016	TG(14:0/o-18:0/18:0)	HMDB0042934	C53H104O5	65.3198	65.3198	859.749	6.99149	12.1329	7.90629	13.0617	14.3484	15.9316	6.65194	12.3847	11.6112	5.71477	6.83957	10.371	10.3518	12.1288	12.2456	11.0697	9.58289	9.04481	8.62258	10.5107	8.48691	5.23203	10.3242	10.33	11.2384	9.95296	10.4332	9.56665	9.96802	7.55336	5.41105	10.2502
TN1371	TG(14:0/18:1(9Z)/o-18:0)	HMDB0042390	C53H102O5	65.8351	65.8351	819.783	10.5059	12.883	7.891	8.79683	12.023	15.6535	8.63595	9.72845	10.1714	5.5649	8.42873	18.1392	15.9112	9.30093	16.7338	11.1983	11.6513	13.6305	10.6796	9.5828	8.7987	5.56458	10.1708	8.98842	10.9316	10.9795	10.2408	11.4064	10.3527	8.97089	8.6776	7.08512
TN2557	TG(14:0/18:1(11Z)/o-18:0)	HMDB0042360	C53H102O5	65.3407	65.3407	801.779	13.2292	12.2435	6.08223	11.0626	13.1239	11.4816	12.0087	9.99714	11.5028	8.51794	7.38233	10.8252	9.10231	10.153	12.3093	12.9731	10.3223	14.0766	9.13681	7.26659	14.2462	7.0833	11.1603	9.44221	9.10919	11.0254	13.1246	7.85077	9.44067	9.47807	8.0831	9.73962
RP2449	TG(14:0/20:0/o-18:0)	HMDB0042210	C55H108O5	66.3303	66.3303	871.805	23.1351	13.1118	15.8312	20.1563	23.1068	22.4451	27.8014	23.3396	23.3417	15.7145	12.6957	24.6093	19.6962	18.1893	17.6044	25.6321	23.1273	22.9628	24.7783	16.3085	21.0357	13.8097	29.9135	19.9642	22.3404	24.0685	29.267	18.9182	30.0545	20.4781	27.6391	20.6578
TN2001	TG(14:0/18:0/18:1(9Z))	HMDB0042161	C53H100O6	64.1896	64.1896	833.751	9.44121	13.2158	7.23014	9.80832	9.43088	11.8009	9.40172	8.79869	8.54316	8.08294	6.52336	9.25879	5.88456	6.7391	8.1343	10.6572	9.5042	9.01575	8.33836	9.63007	7.18718	6.09935	9.71384	9.49065	8.89929	8.71812	8.0367	12.2766	7.91567	6.83268	5.56729	7.31034
RP2568	TG(14:0/15:0/22:1(13Z))	HMDB0042104	C54H102O6	65.5921	65.5921	847.775	20.8574	9.70657	9.06226	17.0417	17.044	15.4446	14.3332	16.8205	17.0659	18.7339	9.8566	15.5412	17.8571	13.1434	11.8344	16.7467	18.9606	16.0543	19.9143	11.8166	18.1501	14.8525	21.0321	16.3076	20.9562	11.1444	19.1435	13.7288	20.2663	18.6904	18.5917	14.1595
RP966	TG(14:0/15:0/24:0)	HMDB0042097	C56H108O6	65.7608	65.7608	877.82	19.6605	12.0225	9.2941	11.3631	12.3339	17.8505	23.3705	9.20499	18.6773	5.19713	11.88	11.2203	13.9841	13.1589	11.0011	17.3302	13.6208	20.4774	25.472	18.8396	14.19	17.6998	18.1106	20.0303	16.9759	16.4092	21.3917	20.3083	21.4086	14.0741	21.8405	15.3555
TN2185	Vesnarinone	HMDB0042059	C22H25N3O4	775.426	775.426	418.165	64.1326	50.1246	83.4589	63.5736	49.9974	47.0366	42.2448	47.1266	38.1031	45.9199	41.749	54.7318	15.5216	44.4669	30.3388	32.4455	48.9206	54.0505	42.807	49.7584	73.5952	48.5295	47.6632	53.6486	43.1624	42.4691	62.1677	31.3827	53.9647	55.9097	49.9139	47.6805
TN1503	Tripamide	HMDB0042054	C16H20ClN3O3S	143.628	143.628	392.083	56.5259	146.841	34.6306	40.5742	73.496	34.26	45.7295	45.0793	46.5482	27.5476	37.7974	58.6324	47.8636	35.3201	40.6068	30.2825	35.2021	56.4057	58.3918	39.8067	70.6547	32.4945	48.0358	71.1127	53.6877	78.4155	47.4556	50.4745	224.595	73.8987	66.6598	52.2495
TN2311	Trichloroacetic acid	HMDB0042048	C2HCl3O2	1240.93	1240.93	200.882	41.0473	30.911	30.6026	24.9436	22.3989	21.4375	22.671	19.9804	22.1737	20.918	22.6288	21.6705	23.8892	20.1195	21.1903	22.487	21.4036	24.5501	27.1403	23.0514	25.0248	22.1494	21.0167	26.887	23.5574	23.1103	21.1531	22.8132	27.1186	22.7789	25.7144	13.2071
TN310	Tiropramide	HMDB0042042	C28H41N3O3	395.088	395.088	490.304	23.6653	25.0549	22.7247	20.9703	21.187	21.4147	21.5312	20.5383	23.2781	20.5377	18.792	23.4227	22.5262	18.5345	18.2609	16.8151	16.6482	17.9333	16.9753	18.8118	13.8979	17.9626	17.6136	16.5326	18.4402	16.3437	16.2119	16.6896	17.4116	16.6614	17.3094	15.7445
TN472	Talinolol	HMDB0042020	C20H33N3O3	1086.39	1086.39	386.237	1484.6	1119.09	1221.45	460.226	1561.32	1898.99	1328.42	1596.45	2093.86	1133.04	1923.4	2045.89	577.227	1218.01	1731.19	1094.13	669.659	1078.92	770.865	580.919	642.017	405.394	764.842	557.315	1143.71	1218.59	1342.69	818.84	1333.22	1166.54	1136.18	770.339
RP1198	Sulforidazine	HMDB0042015	C21H26N2O2S2	602.699	602.699	420.176	127.194	88.8132	164.76	125.692	126.152	132.652	132.63	121.837	122.481	124.478	125.218	109.89	109.456	121.589	92.079	106.209	123.559	109.018	118.092	117.962	135.237	80.7808	95.7499	98.5255	122.088	106.906	124.305	59.6151	96.5282	98.1165	97.2953	97.6178
RP2113	Sofalcone	HMDB0042013	C27H30O6	270.4	270.4	468.24	81.2771	73.0047	101.783	116.431	101.908	80.8367	94.4897	95.0846	143.102	112.538	159.111	97.594	108.528	89.9358	146.83	144.595	124.025	107.247	93.6689	133.062	137.59	136.009	112.312	114.584	158.895	136.988	116.739	147.099	147.607	130.945	138.238	98.0129
TN2303	Rutaecarpine	HMDB0042010	C18H13N3O	90.4039	90.4039	288.111	258.572	230.779	249.128	639.902	198.692	248.933	194.865	377.104	674.149	262.6	357.201	368.823	78.1872	429.901	275.488	1058.34	274.949	323.722	150.465	402.804	171.521	435.747	271.714	272.762	403.109	318.782	350.629	185.979	799.934	386.178	205.18	223.212
TN1390	Rufloxacin	HMDB0042009	C17H18FN3O3S	75.4942	75.4942	402.062	31.3124	18.2193	24.2441	22.0897	21.0747	21.7818	30.6757	22.7114	36.6247	24.3503	32.7678	21.7473	23.5113	22.8156	33.0668	31.8727	32.3045	20.107	32.3843	34.1387	27.9042	26.684	22.1576	26.2868	34.9097	36.1684	30.7667	32.7399	34.867	28.7825	33.9215	26.8316
RP1900	Pranoprofen	HMDB0041996	C15H13NO3	78.3867	78.3867	278.08	61.6119	70.3349	89.5112	103.349	79.1475	73.0419	117.11	95.4236	85.2927	94.3937	95.9596	72.1513	68.433	76.1549	75.8725	70.6277	92.7836	65.97	83.737	130.971	82.873	89.5665	71.159	99.9593	85.7765	95.0251	81.8795	85.86	110.787	139.379	135.377	104.602
RP1428	Pivalic acid	HMDB0041992	C5H10O2	70.8829	70.8829	120.101	449.303	409.805	293.987	349.026	311.154	407.508	341.442	350.865	331.784	274.336	351.859	495.454	266.285	259.55	279.146	353.109	398.385	600.333	505.59	312.242	406.802	259.003	317.777	421.782	450.805	456.194	436.505	423.524	597.183	346.554	315.195	336.92
RP3343	Piritramide	HMDB0041990	C27H34N4O	627.446	627.446	469.237	190.48	132.814	199.891	168.953	203.126	164.748	139.761	148.048	130.821	155.716	165.171	150.494	143.838	144.84	136.992	160.176	172.107	155.173	146.942	192.731	192.065	171.763	163.416	145.419	164.788	164.866	170.775	139.669	165.521	160.779	170.866	137.272
TN4	Pipemidic acid	HMDB0041989	C14H17N5O3	518.321	518.321	326.122	11.1426	8.67207	8.46464	8.04378	7.60739	8.75107	7.89309	9.74698	9.29401	8.91956	9.97334	7.47309	7.86141	8.3979	7.44166	8.93551	45.9405	48.4063	45.5506	44.6401	49.7791	49.8664	47.7183	49.5819	37.5335	43.1907	46.9228	42.3104	37.3923	49.4479	45.1768	42.506
RP2367	Pinazepam	HMDB0041988	C18H13ClN2O	181.166	181.166	291.069	206.201	12.6937	1246.27	1413.44	1406.42	3541.11	2422.11	3267.66	2815.26	3882.67	513.353	880.066	19.6213	1102.48	837.955	1098.63	851.898	2331.47	1275.21	4034.8	622.76	200.805	675.224	629.335	1256.4	2257.1	2637.18	2268.35	647.943	1045.68	611.622	850.247
RP1194	Nnal-N-oxide	HMDB0041953	C10H15N3O3	275.859	275.859	248.099	108.947	108.347	97.444	122.422	80.5434	91.5099	125.853	124.376	129.298	90.5962	128.76	134.283	95.2506	107.937	84.5079	113.178	139.433	131.056	172.962	135.381	104.135	74.5852	160.862	115.781	143.301	103.724	128.335	84.2507	135.457	122.716	121.504	92.7052
TN1171	Nitecapone	HMDB0041949	C12H11NO6	215.893	215.893	304.017	27.6584	19.5897	23.8213	10.2808	13.9826	8.17535	20.4986	10.9127	35.1105	9.27914	26.7308	15.836	8.48472	12.8407	16.4265	10.701	15.885	18.7421	35.0327	14.6602	17.7523	8.5193	31.2808	10.1887	34.134	26.0621	14.4655	24.4478	33.7996	18.9529	30.8066	13.4044
RP3339	N-Acetyldopamine	HMDB0041943	C10H13NO3	94.2605	94.2605	213.122	153.28	113.486	404.838	398.021	336.006	369.556	631.223	699.758	1189.38	1123.76	486.409	362.965	170.784	582.453	371.969	432.859	570.504	656.618	1215.81	1121.74	540.828	538.949	370.574	335.844	631.535	977.288	1182.76	808.29	120.542	321.34	272.862	172.501
TN756	Moxonidine	HMDB0041938	C9H12ClN5O	71.7064	71.7064	242.08	111.492	84.85	122.819	192.538	60.8167	54.3554	117.05	148.696	70.1569	168.508	73.1182	102.814	42.7863	120.705	38.2184	106.632	153.112	103.897	122.526	215.916	243.328	218.427	237.245	198.589	160.642	109.64	141.359	53.9342	143.889	330.062	319.986	424.34
RP2907	Morphine-3-glucuronide	HMDB0041936	C23H27NO9	73.5015	73.5015	462.177	18.17	266.911	287.727	176.374	56.0731	26.6285	131.738	105.305	26.4276	734.169	377.662	28.5305	66.4526	382.678	157.505	60.9801	24.5361	19.2871	12.7529	332.855	104.861	728.104	39.0893	96.8348	31.6436	27.1043	24.1768	27.63	18.3097	123.455	40.5724	190.724
RP1969	Ketobemidone	HMDB0041913	C15H21NO2	280.817	280.817	230.156	109.048	136.458	206.93	232.665	168.745	104.407	166.258	128.803	121.545	287.625	191.398	164.387	137.195	199.977	158.486	138.324	153.678	153.656	127.288	333.497	267.893	293.933	273.337	234.265	220.627	217.602	189.217	212.285	162.372	239.129	252.875	237.875
TN663	Imidapril	HMDB0041907	C20H27N3O6	1142.29	1142.29	428.179	32.3167	24.9017	33.0973	26.8391	30.2033	30.5159	37.3825	24.579	28.647	21.4896	39.5062	28.065	11.6923	29.1579	28.9619	26.5812	19.4778	20.2281	20.193	23.3909	22.8942	19.251	18.874	17.3381	27.8223	26.5851	24.8836	20.183	24.4368	26.4204	12.3414	22.291
RP113	Hexamethylene bisacetamide	HMDB0041901	C10H20N2O2	644.952	644.952	201.16	16.6372	140.355	74.1592	116.197	110.289	122.81	124.547	110.26	122.48	101.05	97.9012	96.9217	108.007	84.2759	93.2474	86.7925	16.3692	19.538	24.8058	19.5844	26.3397	14.4623	15.6098	24.3241	11.664	9.32698	12.2866	12.2823	16.9454	13.0688	12.6016	13.7982
TN2616	gamma-Carboxyglutamic acid	HMDB0041900	C6H9NO6	104.023	104.023	156.031	34.1867	38.7664	57.0443	51.3871	19.1477	47.237	42.1398	55.3884	18.6853	16.9935	37.436	43.2721	8.6729	36.1895	12.4521	25.7412	42.5594	40.8362	37.6884	52.9882	23.5593	24.5297	47.6338	40.7612	32.0715	24.4753	41.0396	10.4506	22.2297	30.1357	17.7773	21.2216
TN1100	Gadolinium	HMDB0041899	Gd	71.8903	71.8903	158.928	9.23027	5.4668	8.65062	10.9649	5.9637	10.9189	7.69672	8.85416	6.60694	1.1889	2.29866	8.82603	3.36999	3.92697	8.83325	9.0373	11.9274	8.45144	8.77443	14.5835	11.1757	4.40586	9.05024	12.6363	8.19085	10.0873	7.09248	7.52375	8.44496	8.31901	6.87557	12.8785
TN1961	Flumequine	HMDB0041895	C14H12FNO3	255.981	255.981	284.071	735.028	658.477	655.096	759.247	573.313	627.18	759.257	616.118	614.662	624.836	524.168	549.532	124.378	647.785	622.17	576.035	650.282	604.358	436.527	708.442	598.709	562.19	535.254	546.264	678.819	650.53	600.2	617.996	620.15	883.661	762.011	687.896
RP148	Famprofazone	HMDB0041891	C24H31N3O	789.744	789.744	378.25	132.787	43.4783	180.986	143.383	176.496	144.263	159.623	155.522	170.033	175.063	158.238	160.646	141.624	162.272	140.695	133.301	43.065	56.0617	72.2341	58.2063	55.458	61.8629	60.9357	47.0474	52.9673	40.6387	53.2995	40.2631	36.7398	37.2537	45.6643	50.2544
TN531	Doripenem	HMDB0041883	C15H24N4O6S2	72.8898	72.8898	443.102	85.6038	39.4825	47.0372	41.3394	92.4689	96.2661	46.409	58.3395	68.0201	60.8197	39.7831	90.7394	69.768	43.1756	63.7073	107.979	129.35	124.702	98.6758	52.2813	96.6115	119.731	201.941	142.333	122.36	160.343	112.104	211.403	152.627	105.573	121.229	78.7268
RP1771	Detomidine	HMDB0041872	C12H14N2	779.328	779.328	169.114	21.906	47.2497	45.8893	60.5743	43.5421	55.5196	45.6533	47.8525	55.447	44.4278	46.4833	49.1113	64.4312	39.0085	59.0052	43.3698	56.6987	65.5538	65.1117	79.329	62.1621	71.3842	56.6591	68.9763	60.6483	75.9356	59.0627	71.6022	46.2659	45.538	54.3657	46.758
RP2437	Carboxytolbutamide	HMDB0041849	C12H16N2O5S	85.2157	85.2157	323.067	78.0557	78.284	101.446	126.163	101.952	109.65	122.508	116.344	126.171	115.996	104.889	89.3468	80.0558	87.8915	102.087	108.783	129.834	97.8917	123.176	99.4127	99.9325	90.8111	88.1203	94.6361	103.648	128.708	94.4887	101.069	82.2587	73.6258	93.0645	67.8885
RP3338	Benzoyl ecgonine	HMDB0041836	C16H19NO4	252.162	252.162	328.095	62.2069	94.6554	80.0023	83.4788	69.7672	81.9034	80.3449	70.2577	106.605	96.5425	105.41	96.8079	78.6112	84.9664	104.106	85.3028	103.71	61.337	92.1425	89.7309	92.7695	160.106	111.817	77.9059	78.4237	81.3931	60.4603	140.488	68.2127	77.8317	68.1542	55.1504
RP2587	Amifloxacin	HMDB0041826	C16H19FN4O3	846.535	846.535	335.152	1117.42	702.53	942.183	874.677	716.079	755.526	719.054	836.297	439.012	635.644	327.357	729.565	388.779	428.963	275.557	416.379	885.539	848.604	867.336	823.947	724.264	494.512	837.022	923.433	931.713	539.859	752.958	399.19	555.811	436.286	495.167	356.933
RP2294	Acetylisoniazid	HMDB0041821	C8H9N3O2	116.555	116.555	218.032	171.828	132.336	119.826	130.961	184.544	155.247	151.109	152.883	190.498	165.417	138.897	218.686	145.502	84.2619	136.967	175.733	218.316	154.272	204.756	175.503	214.266	163.987	163.725	170.02	224.746	151.565	180.399	175.181	185.543	224.775	125.521	146.742
TN1175	8-Oxoguanine	HMDB0041820	C5H3N5O2	169.928	169.928	188.019	72.0975	33.2744	49.6168	42.1112	68.6358	37.4007	40.871	44.0349	41.2823	32.176	32.1415	38.4288	12.1616	25.4545	25.6195	26.898	43.6403	65.0577	93.2093	45.6888	45.9233	32.4185	66.8493	37.8421	70.177	64.814	42.9699	50.2503	47.3934	38.611	31.987	30.9289
TN1241	6-Sulfatoxymelatonin	HMDB0041815	C13H16N2O6S	255.932	255.932	367.038	186.611	153.058	160.574	132.392	144.887	121.794	182.961	122.575	144.21	104.472	120.778	110.266	49.1477	106.434	145.974	92.888	117.385	98.3675	100.998	106.023	143.098	81.7027	95.178	88.0486	102.129	130.243	95.8651	131.763	113.515	111.32	142.1	83.4375
RP3302	6-Demethylgriseofulvin	HMDB0041813	C16H15ClO6	79.767	79.767	339.063	65.2311	95.6628	98.3811	109.837	88.7445	88.208	115.335	99.9113	96.7059	124.513	95.4625	78.0707	83.3674	92.1027	102.595	87.7909	111.287	82.8052	65.6988	100.78	110.663	124.58	114.242	93.4633	91.2743	97.8541	84.1834	92.4721	77.314	97.3435	88.1026	91.7303
RP2737	4-(Methylnitrosamino)-1-(3-pyridyl)-1-butanol	HMDB0041809	C10H15N3O2	68.1646	68.1646	192.117	228.555	347.71	285.747	271.775	235.209	207.952	212.974	226.962	169.131	337.937	265.057	402.04	159.963	349.125	239.767	276.337	307.359	180.922	173.022	250.744	446.555	340.744	179.623	267.052	300.788	239.397	273.919	301.477	301.878	342.878	300.42	410.424
TN165	1,1,1-Trichloroethane	HMDB0041791	C2H3Cl3	1241.23	1241.23	154.904	8.95709	8.04451	6.65517	6.26438	6.20752	8.02163	8.53147	7.90458	6.96698	8.89522	7.23868	7.94009	10.7715	8.03502	11.246	9.45985	12.4396	11.4327	12.6121	12.4614	11.0834	11.8978	12.5336	12.6954	11.8138	14.2573	12.9002	12.9488	13.1321	13.9267	12.9911	6.6134
RP1281	Vanillic acid 4-sulfate	HMDB0041788	C8H8O7S	147.562	147.562	266.033	166.749	138.117	164.448	161.428	154.677	139.632	204.405	208.699	114.014	270.534	273.805	150.906	200.026	178.27	185.739	179.281	164.679	207.164	120.838	298.93	291.18	231.188	202.139	210.728	251.448	270.469	334.681	305.422	291.062	263.64	250.423	226.917
TN1710	Sesaminol 2-O-triglucoside	HMDB0041775	C36H46O22	73.2759	73.2759	831.253	9.31396	23.2311	14.0453	13.6997	11.8914	17.5278	7.81118	9.60958	12.8437	30.9497	18.3837	14.9831	5.81822	26.6032	19.7544	16.2672	20.0084	18.6908	14.827	23.4279	13.1823	40.2371	8.35939	18.5196	9.9721	18.5276	22.131	8.42357	27.4949	18.4266	6.23747	22.5049
RP3083	Peonidin 3-sophoroside	HMDB0041766	C28H33O16	783.887	783.887	625.178	18.1225	20.6901	40.6216	38.6156	37.4743	54.4199	48.258	33.196	29.7849	22.5643	24.6231	37.5207	43.866	52.1349	32.962	30.6984	33.5654	43.1868	23.2401	76.5165	63.9952	35.6988	49.3166	42.7571	33.5981	13.778	28.5239	21.3192	17.6296	39.8928	44.2529	46.2225
TN2200	Irisolidone 7-O-glucuronide	HMDB0041746	C23H22O12	330.334	330.334	455.098	157.994	138.087	131.686	126.372	124.304	130.285	136.728	121.914	132.119	122.089	136.417	115.564	29.5308	124.082	117.349	118.832	98.5578	102.79	112.459	97.6087	94.356	90.4195	84.1625	76.5827	95.2959	115.118	101.82	98.6232	366.111	280.394	220.293	226.312
RP3251	Dihydroferulic acid 4-sulfate	HMDB0041724	C10H12O7S	72.3814	72.3814	294.063	34.7845	49.4031	48.0674	51.7778	46.1474	39.3994	56.9999	54.6153	70.0385	42.0303	51.2406	43.6675	41.9091	51.6855	41.3106	47.1022	39.811	78.3968	35.5477	67.7776	61.2327	49.2186	49.042	44.0145	43.5505	37.6713	34.4564	41.5461	42.4959	60.4184	48.8828	56.1498
TN2049	4';-Methyl-(-)-epigallocatechin 3-(4-methyl-gallate)	HMDB0041668	C24H22O11	135.293	135.293	469.113	75.477	58.7446	45.9521	75.5217	60.7565	66.224	54.0899	68.7326	56.3378	89.4917	55.0952	71.2925	42.9939	94.9564	62.7195	86.9344	60.9975	84.1523	55.8665	82.0665	59.9683	64.1466	59.6036	62.3677	98.7383	52.586	100.928	74.3234	56.721	102.85	58.4804	70.2991
RP2487	Myricetin 3-arabinoside	HMDB0041635	C20H18O12	74.4699	74.4699	468.11	46.7437	366.251	287.762	100.976	79.7169	64.9025	124.71	113.334	112.641	542.756	278.643	72.9713	93.3933	321.646	201.448	114.992	74.3999	68.308	84.6076	266.869	103.734	347.94	81.2068	93.1974	72.9658	108.415	91.0223	92.0872	60.9704	125.345	89.2591	164.378
RP2286	17-Beta-Estradiol-3,17-beta-sulfate	HMDB0041620	C18H24O8S2	80.8988	80.8988	471.053	55.9516	34.76	54.3919	47.1266	53.3839	75.8629	57.3747	46.3066	62.2331	65.4179	50.9617	57.2185	63.7677	40.1494	52.6603	55.4161	63.1905	62.874	49.067	49.365	54.6816	60.1436	60.1202	49.208	75.4492	48.3659	72.6913	64.4685	54.6551	69.4924	82.0936	49.279
RP967	Bis(1-methylethyl) hexanedioate	HMDB0041613	C12H22O4	649.218	649.218	231.164	25.8795	92.9314	28.9877	73.2686	27.2375	30.3694	79.6209	24.2356	71.5774	31.0798	64.0175	25.5704	30.6743	35.6206	32.3996	26.2804	17.9359	18.2754	17.5318	15.3	15.5933	17.3934	15.2205	16.6315	18.2058	18.0544	19.2378	15.8137	15.9222	13.814	17.2491	17.2445
RP1022	Lithol Rubine	HMDB0041567	C18H14N2O6S	74.8312	74.8312	369.054	80.5375	85.1885	76.6741	72.7289	86.4086	92.313	91.6598	76.0566	73.6216	91.7097	81.2826	59.0957	54.369	74.2457	90.3174	70.5874	58.733	71.3307	77.3531	85.0783	22.5706	78.2552	73.2037	61.006	51.9797	59.6448	63.3817	62.2979	68.8594	79.6321	52.9532	69.2563
TN402	Hovenidulcioside B2	HMDB0041549	C38H60O12	376.649	376.649	709.411	65.2614	73.94	65.5794	59.2795	69.05	59.9155	65.4908	62.4095	60.7843	61.0569	65.3015	66.9553	64.7172	58.9665	62.7208	56.1219	53.3096	63.3113	58.3385	56.3369	57.7444	60.5143	59.4614	57.0912	52.933	55.9067	55.3743	56.2338	55.5124	57.488	58.6411	53.0844
RP1897	Hovenidulcigenin B	HMDB0041547	C32H50O7	620.179	620.179	569.343	16746	16257.7	23671.8	21525.5	20222.6	18947.5	20070.8	18750.3	14803.7	21670.2	17572.8	16465.5	16990.6	18580.3	13490.2	16784.5	19025.9	17894.7	22782.4	27494.7	27662.3	20927.1	22622.6	26729	20458.4	21884	20461.3	14935.6	21517.1	21269.3	21654.2	20743
TN1544	3-Dehydroteasterone	HMDB0041527	C28H46O4	344.084	344.084	469.329	477.03	521.537	475.057	470.739	447.656	426.124	461.97	454.844	491.109	472.574	497.627	427.472	311.712	472.133	466.84	451.893	412.089	393.33	396.981	438.334	436.859	453.893	444.159	416.226	464.449	475.782	406.164	469.419	442.892	474.534	439.934	426.13
TN2330	Bis(2-furanylmethyl) sulfide	HMDB0041503	C10H10O2S	174.149	174.149	232.998	232.628	247.197	285.491	263.316	240.855	276.385	366.026	357.806	346.672	139.506	258.166	315.068	159.203	161.065	207.743	163.348	254.427	437.321	549.523	212.953	225.44	159.219	329.258	211.602	310.657	249.586	219.92	206.37	306.661	206.704	210.872	159.717
TN1808	1,2-Butanedithiol	HMDB0041492	C4H10S2	73.2366	73.2366	105.02	13.4068	11.4713	8.29943	12.5589	8.74184	15.7374	8.71037	10.663	15.7033	13.3777	14.0657	18.6708	6.84396	14.3077	22.6409	18.15	11.1114	18.9134	16.1185	17.2519	10.9135	7.82552	15.598	17.9696	16.056	19.1584	22.4938	15.0945	17.247	16.2262	14.8061	16.7199
TN1640	D8';-Merulinic acid C	HMDB0041453	C24H38O3	1134.66	1134.66	339.272	9.48706	51.7632	21.7957	45.2285	6.17909	9.15782	7.20212	6.61172	9.80774	6.70122	11.0425	12.9404	6.75689	10.4036	10.8518	10.7406	5.01634	33.8606	42.0655	4.99669	5.89361	4.11207	4.69952	3.59887	4.49138	5.51143	10.4465	3.10841	49.3177	10.6059	8.41075	1.47942
RP666	Agrocybenine	HMDB0041445	C12H18N2O	842.376	842.376	224.174	25.9263	16.282	26.9133	21.3846	22.8646	20.1477	32.5306	25.1	15.9415	15.35	14.1264	23.2131	10.7942	14.044	8.00623	15.7984	20.8552	11.1911	14.3118	17.2518	11.0291	11.7657	15.7541	12.5285	8.96637	5.43192	7.18372	3.73542	6.0393	4.29237	3.60535	2.61499
TN2357	Hispolone	HMDB0041442	C12H12O4	135.169	135.169	243.062	7381.43	7752.98	6185.52	7230.37	5742.54	6114.8	6020.99	7927.53	4826.59	9770.47	5371.83	7749.93	3188.98	9838.14	6331.66	9477.06	7594.84	6953.01	5731.82	9916.18	7518.6	7670.71	6970.77	6843.04	6467.63	4597.86	7268.77	5306.44	6261.3	8118.61	4716.57	6215.98
TN253	4,4';';-bis(N-feruloyl)serotonin	HMDB0041433	C40H38N4O8	796.411	796.411	685.273	13.7212	12.8274	13.3619	8.78464	6.31656	11.0207	5.05318	12.9938	12.2394	8.33026	8.58095	5.31202	4.1185	12.8022	9.77998	7.86336	10.3971	24.7338	13.9693	17.8724	12.2918	17.4608	20.6185	18.8228	20.7984	20.6832	13.8437	14.9128	20.4705	21.1715	12.5452	28.8583
TN632	4-[N-(p-Coumaroyl)serotonin-4';';-yl]-N-feruloylserotonin	HMDB0041432	C39H36N4O7	766.998	766.998	655.249	86.4671	113.355	81.1333	92.1922	89.6395	95.4987	103.262	90.3467	89.9433	81.0592	82.1656	79.329	51.5413	80.3072	72.1553	69.9248	56.7319	69.4715	67.7753	43.3578	93.6721	59.4851	68.1388	63.2979	87.1598	80.7029	77.5889	64.0629	58.6539	52.8811	40.2311	60.2742
RP609	Gymnodimine	HMDB0041430	C32H45NO4	649.393	649.393	525.373	147.956	12622.6	8003.96	14683.2	13686.9	13809.1	15023.2	15956.4	15241.8	16162.9	13862.2	11457.8	10299.6	13262.9	6328.7	8650.13	2845.77	2184.62	2669.68	2950.06	2041.43	2669.76	1691.2	2485.71	1995.73	2023.75	2583.95	2179.77	1356.32	2045.45	1754.48	2238.73
RP597	Squamosinin A	HMDB0041429	C36H62O8	823.992	823.992	645.431	49.4787	317.197	333.675	60.9183	261.736	56.2265	187.66	58.5455	221.852	217.177	240.624	273.627	282.097	285.086	353.716	385.51	150.015	146.949	210.741	114.822	122.607	76.938	63.0116	42.2703	38.2566	33.3884	26.2136	29.4356	29.9157	33.0184	46.2372	50.6377
TN1685	Erinapyrone B	HMDB0041427	C7H10O3	68.7145	68.7145	181.026	95.9534	102.353	82.8116	51.9072	104.28	98.1954	93.4084	51.086	107.154	40.3614	99.3446	101.581	70.3907	86.9243	116.757	88.5059	42.8724	115.975	70.94	93.4148	86.7314	52.2245	105.062	94.3603	118.459	132.454	133.615	118.92	110.898	128.158	120.295	111.408
RP1654	Isoleptospermone	HMDB0041425	C15H22O4	322.568	322.568	284.184	51.7083	54.3836	24.4412	45.6925	35.9037	77.5652	38.389	32.8542	92.6775	103.591	127.517	202.4	55.4687	120.099	97.8374	113.314	52.2967	13.2313	58.107	37.1622	59.3205	78.1305	28.7437	59.8059	114.5	103.468	116.791	170.278	673.159	301.775	254.91	194.619
TN684	Mulberrofuran E	HMDB0041423	C39H36O8	312.124	312.124	655.231	14.8134	19.4125	30.0663	24.1816	19.9733	16.8856	18.9726	23.8486	37.4091	42.019	48.0162	24.7596	2.31955	37.9283	46.6086	43.7885	38.1389	30.9784	24.4695	40.2243	57.1686	49.9371	44.3855	40.1092	55.5748	61.8325	47.9799	44.3381	35.5964	90.9821	75.1372	72.9481
RP2778	Sarcodon scabrosus Depsipeptide	HMDB0041421	C23H39N3O8	667.398	667.398	486.281	255.414	95.082	238.168	167.166	171.539	209.419	203.903	204.533	159.326	154.974	109.387	167.854	149.885	146.465	135.722	171.774	172.66	190.803	221.94	248.958	209.436	140.487	184.924	173.801	158.288	124.809	171.084	106.198	157.207	142.565	163.117	133.419
RP626	Clausarinol	HMDB0041407	C24H30O6	152.998	152.998	432.237	166.948	119.453	229.407	249.674	182.843	160.199	156.187	162.348	197.347	275.444	256.725	215.486	206.919	247.69	264.614	281.18	289.642	257.428	252.342	332.742	382.001	382.518	419.709	365.373	391.206	340.262	365.778	358.677	329.857	512.969	542.609	465.377
TN1572	1-Propenyl propyl disulfide	HMDB0041392	C6H12S2	171.655	171.655	171.027	77.6992	113.711	114.001	124.908	84.8452	129.474	80.9432	154.259	72.9196	61.2253	111.544	162.145	87.174	71.5793	83.6984	87.1074	131.004	222.623	270.956	110.89	97.9808	65.4919	146.002	109.517	137.078	162.986	122.001	135.448	149.376	105.717	96.3952	79.7985
TN1121	(E,E)-Di-1-propenyl disulfide	HMDB0041390	C6H10S2	74.0441	74.0441	184.986	176.413	41.0589	46.9757	51.6575	66.2678	154.381	65.1438	61.3945	175.358	59.5908	59.1819	333.596	31.0089	124.302	243.651	204.461	83.5238	266.135	258.786	93.6079	85.9996	44.9018	161.318	191.484	112.826	97.2594	231.057	84.576	727.29	885.965	731.7	1001.45
TN2325	Quercetin 3-(2-caffeoylglucuronoside)	HMDB0041387	C30H24O16	136.155	136.155	663.094	47.5014	73.9535	76.0723	68.9202	60.0704	33.0191	57.2739	39.5129	64.4434	41.794	64.4058	37.6087	65.3101	52.2941	83.3437	37.8558	65.9895	41.1373	68.6341	67.3296	66.0075	91.8299	64.9175	56.8864	36.3534	71.8276	39.4115	92.0008	50.4049	62.7548	52.7557	62.1027
TN1929	Garciduol B	HMDB0041381	C27H18O10	76.422	76.422	485.087	29.9111	52.4671	39.444	52.6161	29.2687	36.2798	44.226	39.4809	28.7014	112.165	44.3744	31.6585	12.6422	73.7001	42.9782	35.4899	37.1635	21.994	23.101	57.4328	46.7645	89.5187	25.062	37.9581	26.4781	25.8146	29.8333	26.7835	31.0429	45.5161	41.2007	53.3357
RP2669	Ustiloxin B	HMDB0041373	C26H39N5O12S	85.1069	85.1069	684.19	9.19161	31.6316	34.078	40.412	33.0012	24.4824	52.4247	37.4963	74.4251	76.7037	42.0145	34.075	26.058	64.9095	44.2841	48.8912	60.0818	30.1428	31.5074	45.2787	37.7555	38.1509	22.5072	19.5669	48.5423	40.5419	37.2529	68.6388	40.8788	24.1631	27.8083	26.5854
TN394	24-Acetyl- 25-cinnamoylvulgaroside	HMDB0041368	C36H48O8	794.136	794.136	591.333	149.361	118.923	162.027	145.294	151.278	132.122	132.115	125.895	102.664	123.851	111.41	101.781	42.1907	129.654	83.7984	96.644	91.9342	92.9274	81.1513	116.791	108.109	106.227	96.098	93.538	75.1537	78.1158	91.2756	65.2546	66.7682	77.8674	55.751	88.131
RP2311	25-Acetylvulgaroside	HMDB0041365	C27H42O7	549.615	549.615	501.28	400.276	225.406	635.731	555.067	439.474	290.281	530.778	400.325	472.629	845.472	511.623	468.692	402.874	695.464	457.523	591.468	483.857	397.445	526.063	778.372	861.921	602.689	455.543	444.156	655.862	559.005	811.992	381.569	447.139	848.747	777.443	680.403
TN130	Lucyoside K	HMDB0041353	C36H56O9	376.594	376.594	633.394	74.1405	75.6328	66.0334	70.447	65.6665	62.9712	61.4855	59.2636	67.5919	64.3873	65.3284	64.2409	54.3411	63.4006	57.3409	59.7226	50.2911	48.8583	49.4184	54.0926	55.2974	53.8279	52.5772	48.1468	52.4564	55.2442	51.6646	54.0504	52.9938	50.927	55.9189	52.4766
RP1986	Flupoxam	HMDB0041341	C19H14ClF5N4O2	237.091	237.091	478.107	208.453	198.289	133.255	158.941	113.818	126.332	141.433	129.387	164.462	89.3481	203.163	222.543	123.944	135.162	113.895	179.476	206.718	139.625	102.763	80.8243	182.952	204.667	202.84	203.007	192.413	163.38	152.006	118.633	130.681	128.534	115.37	122.023
RP3430	Raphanusamic acid	HMDB0041280	C4H5NO2S2	69.4383	69.4383	163.984	88.899	86.4245	57.7811	25.8131	105.793	113.173	57.7031	47.962	90.8223	43.8107	55.9795	88.2445	114.752	59.0243	91.9923	64.5884	53.0094	93.5317	60.5276	50.2963	55.71	25.957	71.6096	67.6248	77.2945	85.0057	108.367	95.2401	78.5596	76.591	88.915	80.2625
TN1701	Cyanidin 3-(6';';-p-coumarylsambubioside)	HMDB0041261	C35H35O17	77.1664	77.1664	691.168	23.1465	48.0865	49.5095	46.1097	27.1329	21.0477	38.1096	33.9514	43.5278	106.885	53.9145	41.6274	9.8829	84.1075	39.6287	51.0134	42.843	22.1726	25.6766	52.1819	23.0063	91.1982	23.9881	26.0606	27.1144	40.7416	30.5611	32.1973	34.9737	33.7012	31.2264	42.7971
RP2128	N-[[3-Hydroxy-2-(2-pentenyl)cyclopentyl]acetyl]isoleucine	HMDB0041248	C18H31NO4	822.421	822.421	348.215	91.1295	68.5293	78.8024	78.2137	73.636	57.9939	80.9851	76.0025	66.5718	64.3986	62.1125	80.0474	41.1935	72.491	68.437	64.4261	25.6547	25.6993	32.1679	36.1042	22.9327	25.2517	30.8152	19.5957	23.2705	16.9302	20.4708	13.5102	9.94457	43.4483	70.479	348.232
TN688	Secoisotetrandrine	HMDB0041246	C38H40N2O8	752.065	752.065	675.266	20.1207	16.6128	20.1778	17.8781	14.7736	24.5565	21.361	17.8305	14.0563	12.153	13.8827	9.99038	4.98367	11.6549	9.47187	11.1178	15.6148	15.4147	8.99819	16.9853	18.3151	10.8389	11.5009	13.9629	9.31905	8.46729	10.6613	6.12123	10.2387	11.2157	4.70968	5.98575
RP2102	6';';-O-Acetylvicenin 1	HMDB0041235	C28H30O15	88.7567	88.7567	629.145	32.7817	24.4901	55.8624	75.0853	53.1069	52.5767	70.523	60.5279	87.3944	88.3864	70.3142	63.1238	46.796	72.4111	82.1217	69.0505	64.2981	44.0965	76.1396	77.6062	43.0076	74.9281	44.6899	22.5299	50.7696	64.2334	49.76	57.0349	38.5761	76.8358	56.2693	43.3237
RP654	beta-D-Galactopyranosyl-(1-&gt;4)-2-amino-2-deoxy-beta-D-glucopyranosyl-(1-&gt;6)-D-mannose	HMDB0041224	C18H33NO15	149.977	149.977	504.196	46.9521	30.4134	44.3255	46.8835	38.8762	31.3211	27.5075	27.1814	24.106	60.9292	46.8484	47.49	50.6164	54.7989	53.3577	47.8344	52.4889	48.9363	28.5594	68.8467	90.7006	81.9121	68.3538	75.5956	71.9951	60.5129	72.3291	66.7508	66.2873	100.854	102.087	81.242
RP2735	Dide-O-methylsimmondsin	HMDB0041207	C14H21NO9	84.8015	84.8015	386.084	125.967	125.902	131.561	146.872	166.743	141.363	194.912	192.783	162.788	204.074	148.67	110.796	124.097	149.573	148.649	150.651	186.355	181.866	255.917	228.834	136.808	123.002	121.281	85.3378	200.289	165.69	223.067	207.009	62.2219	132.758	138.696	60.6988
TN348	Antibiotic SB 202742	HMDB0041206	C24H34O3	1183.29	1183.29	353.248	65.2551	64.982	92.4044	68.1516	68.0934	71.1658	64.5789	55.8654	52.7409	51.8443	58.7262	65.1121	22.6285	48.9466	39.5206	47.7435	46.014	52.6821	58.1651	50.8346	37.4032	22.9394	41.9933	43.5468	37.6506	35.7269	38.8912	17.4285	22.5044	24.6403	33.7101	31.1549
TN985	Benzyl beta-primeveroside	HMDB0041190	C18H26O10	135.937	135.937	425.14	252.589	129.309	288.286	156.439	288.402	63.0614	266.004	96.9611	229.828	162.11	276.438	92.3618	137.998	202.183	251.819	157.013	269.663	120.725	264.515	307.747	469.808	349.881	403.935	334.455	205.851	296.424	171.462	311.28	333.312	286.029	376.082	334.493
TN627	3,28-Dihexadecanoyl 20(29)-lupene-2a,3b,28-triol	HMDB0041184	C62H110O5	65.3391	65.3391	973.786	8.45843	6.31823	5.79804	7.04744	5.94759	7.51431	5.92536	8.44657	7.66527	8.75063	6.03548	8.22381	6.769	6.68953	9.42927	9.47268	8.17355	6.11045	6.43785	4.95233	6.36251	3.93725	5.79813	5.87192	5.44087	7.67156	6.24595	6.03222	6.8308	5.69237	6.25312	7.30396
RP516	1-Methoxyphaseollin	HMDB0041172	C21H20O5	695.996	695.996	370.164	147.975	71.3361	168.965	106.187	115.857	114.429	123.936	103.51	112.878	95.109	68.4777	84.9463	98.4025	79.7043	76.7325	110.495	61.8981	68.6589	76.7727	81.7733	89.9733	53.6493	56.3399	58.5418	45.3236	42.0958	61.7971	31.1066	50.4304	43.6649	39.8891	35.4542
TN1682	Cycloartocarpin	HMDB0041166	C26H26O6	252.876	252.876	399.159	70.937	62.254	72.795	60.1215	70.7157	55.1873	60.1764	25.1181	35.3905	62.7752	77.555	62.1169	15.7743	62.4299	82.5279	39.4179	35.7602	28.8372	66.3159	69.5164	67.951	62.9783	30.6739	55.4209	33.8859	40.0936	36.5115	35.6338	35.8473	78.744	31.4069	63.5518
TN99	Alatanin 1	HMDB0041154	C38H41O20	822.562	822.562	817.23	13.2341	6.54176	5.02062	4.33211	10.6336	9.70479	10.7072	10.8895	9.07596	6.36243	11.6049	12.2791	6.78362	20.1214	12.8279	19.4413	0.729333	2.02681	8.33449	5.37914	8.18241	4.7974	8.36102	8.07513	3.07621	1.35821	3.34826	0.78915	0.940591	1.30301	1.97671	5.29182
TN2192	Cyanidin 3-(6-feruloylglucoside) 5-(6-malonylglucoside)	HMDB0041153	C40H41O22	258.384	258.384	855.201	21.0163	18.8027	20.079	17.6607	19.6571	13.1083	22.5763	18.1615	22.5573	22.462	24.293	14.998	6.61179	20.3901	24.4625	17.5997	18.3383	15.1531	15.2428	14.3751	25.2673	18.475	21.2436	20.6765	18.338	20.481	17.5758	14.6005	18.0873	22.5076	26.5896	16.8573
TN1874	Glucoliquiritin apioside	HMDB0041149	C32H40O18	488.146	488.146	713.237	58.5461	71.4195	35.2926	48.0346	60.6855	33.579	59.7105	50.9018	69.0065	37.5495	60.7285	53.7431	35.9546	47.6878	41.7154	49.3222	53.3695	53.5503	40.5861	73.0234	68.3323	54.5171	55.1702	64.1656	44.1233	46.0847	47.0978	62.1461	47.7547	44.4041	31.4697	43.2974
TN2335	Corchorosol A	HMDB0041137	C29H44O9	777.677	777.677	559.282	62.6041	47.0925	90.0479	73.6066	47.5427	48.7266	59.263	55.5748	33.2966	59.8279	39.7107	39.3246	17.9651	43.3618	29.9039	39.5569	51.7941	53.6384	54.6788	60.7678	59.4755	56.6648	47.7312	58.5791	51.3486	60.9394	60.133	40.2173	47.9896	49.4621	41.2162	44.4564
TN571	3';';-Chloro-3';';-deoxytriphasiol	HMDB0041136	C19H23ClO5	64.0361	64.0361	331.112	38.1275	24.2899	39.331	34.546	35.4748	29.0253	36.5409	36.9229	34.8709	43.9555	42.4758	30.9356	16.3815	45.6735	32.4935	42.7421	41.1267	40.2547	64.1129	34.2821	75.8709	37.0331	59.7199	44.7698	57.4125	72.0367	41.8864	47.7769	36.6518	59.1479	68.1019	49.5577
RP2547	Artonin Q	HMDB0041124	C31H30O8	249.622	249.622	569.159	130.397	95.5056	192.571	234.52	111.095	95.51	260.189	122.603	116.286	127.5	62.6879	95.6985	54.1086	125.083	146.908	117.188	191.916	122.708	72.5719	205.932	178.179	125.965	120.584	134.574	165.917	96.5036	132.835	105.874	110.77	226.316	325.036	163.549
TN2042	Kanzonol L	HMDB0041116	C30H32O6	282.726	282.726	527.183	155.733	96.0949	142.97	123.607	95.2982	114.977	137.344	111.849	130.762	113.068	126.977	105.304	22.9943	123.488	113.534	124.718	108.109	131.661	120.162	111.993	111.57	92.52	125.943	94.6048	129.561	140.587	138.824	103.097	141.543	138.105	140.097	101.837
RP338	Gingerglycolipid C	HMDB0041095	C33H60O14	323.602	323.602	663.393	121.971	126.164	136.675	137.064	142.473	139.861	141.069	136.723	143.681	147.814	145.435	141.694	135.586	141.022	138.719	152.996	168.704	163.262	156.02	154.622	157.357	168.095	185.056	174.104	188.634	174.891	171.894	170.837	142.513	176.756	187.405	169.86
RP759	(E)-Squamosamide	HMDB0041088	C26H27NO7	147.482	147.482	483.212	24.179	20.0684	30.7527	37.1462	28.7088	20.9123	20.8856	20.908	18.6574	34.9733	31.4218	29.7824	30.368	30.2513	37.5856	40.8323	41.1247	25.6213	21.2979	32.0975	51.9418	58.0341	61.0036	59.4319	67.7875	55.186	55.4242	51.1625	29.6627	83.4712	80.4964	68.6926
TN1470	Furoparadine	HMDB0041087	C17H13NO5	269.108	269.108	350.043	32.1068	33.407	34.7501	43.375	33.9151	24.1011	42.092	25.0968	61.2911	48.8346	39.9273	41.6126	9.97353	45.5044	44.2595	43.2749	41.5056	20.043	24.127	24.2165	38.1429	44.76	30.4689	19.9233	37.6979	38.3351	28.0832	46.9803	39.9087	47.1721	34.5713	31.427
TN34	Citbismine A	HMDB0041086	C35H32N2O10	1232.72	1232.72	679.173	123.256	85.3243	105.261	101.805	108.182	115.651	102.17	113.485	111.282	107.069	94.2048	84.3819	44.5343	79.8554	52.5903	64.1837	7.59251	6.32226	13.4937	13.7467	11.1239	8.16672	12.6232	5.28147	6.48298	6.20996	7.18982	5.24325	7.08133	5.80317	22.1177	4.26899
RP3250	Sambutoxin	HMDB0041085	C28H39NO4	553.919	553.919	476.276	761.353	365.804	905.387	883.871	730.257	716.329	895.725	724.757	450.712	600.518	473.148	620.313	539.101	491.931	403.218	554.404	1017.54	711.096	728.376	1243.55	1064.04	687.103	892.417	755.664	549.822	508.283	838.646	325.213	538.68	474.81	511.3	446.188
RP2654	erythro-6,8-Heneicosanediol	HMDB0041077	C21H44O2	827.539	827.539	367.297	60.3828	47.3026	79.0783	38.7614	72.7738	47.5677	55.1414	58.948	67.0561	49.757	73.9793	58.1614	62.7204	58.2995	56.3588	52.91	55.789	66.1258	88.9723	55.5747	73.4188	82.7297	80.5609	68.984	67.2152	48.4116	70.0028	52.356	50.8227	31.8469	50.5501	63.9286
RP2645	Dimethyl tetrasulfide	HMDB0041065	C2H6S4	63.7664	63.7664	180.92	64.1413	55.8665	43.7964	90.4076	54.526	62.1939	75.8291	72.2566	68.3242	40.9276	50.407	73.702	43.9882	50.8009	50.9083	73.1074	93.5486	78.6366	89.0425	101.573	65.9036	55.5719	64.7526	67.593	77.4196	61.089	54.9274	59.7135	71.5751	46.9554	51.0455	44.0791
TN353	Ajocysteine	HMDB0041052	C9H15NO3S3	72.8371	72.8371	282.032	82.7707	44.2416	74.3842	74.5011	58.1059	56.0915	75.6372	58.5508	63.5509	84.5741	84.2628	48.6198	34.6822	75.0962	66.3159	84.1194	77.7149	74.1682	76.1306	84.8567	84.6611	91.712	90.6537	84.4946	106.685	96.9791	84.6814	91.1947	103.54	128.751	93.2308	113.115
RP3185	Valechlorin	HMDB0041045	C22H31ClO8	323.37	323.37	497.138	37.307	25.5522	61.2008	91.1595	31.0437	47.2048	57.6099	90.9537	85.5919	148.706	164.826	111.609	90.8209	163.921	151.674	215.277	136.048	79.9253	123.167	84.7026	210.021	187.362	32.6385	109.186	140.13	73.7128	95.5356	107.555	105.16	120.703	40.4379	73.5272
RP672	Hovenidulcigenin A	HMDB0041027	C32H48O7	630.934	630.934	567.324	859.492	1018.77	1140.93	940.577	1137.83	1136.5	1054.12	902.251	771.45	928.6	701.277	829.937	743.895	815.47	769.703	779.682	695.681	728.944	843.329	960.014	972.473	869.16	794.848	978.139	684.545	644.921	639.947	587.851	667.882	680.223	693.455	733.593
TN469	Isoacteoside	HMDB0041025	C29H36O15	772.816	772.816	625.212	85.3196	55.558	94.0473	72.7494	58.6908	38.2024	54.4792	52.9496	40.6653	55.1224	47.9247	66.959	16.9946	51.7911	30.2546	34.7207	69.7607	58.8491	79.2024	85.4209	77.36	60.6953	82.475	85.7764	61.2622	79.5475	70.869	39.7454	97.2249	79.0068	59.339	60.7547
TN1770	Hydroxytyrosol 1-O-glucoside	HMDB0041024	C14H20O8	75.0683	75.0683	299.113	69.2945	189.103	122.583	169.492	83.1794	49.1809	112.666	126.113	72.2953	110.252	138.744	73.4247	62.9729	151.71	116.095	64.6655	78.564	54.1824	62.7879	189.203	157.107	214.98	89.7332	156.931	97.5318	68.917	77.6173	85.8388	90.8711	207.599	99.3638	230.986
RP438	Ternatin	HMDB0040991	C37H67N7O8	780.378	780.378	755.541	0	2.09245	2.43463	1.23496	4.85868	0	1.69151	0	2.98555	1.76777	6.43181	4.51241	2.75848	5.3368	7.87133	39.0398	67.8423	60.2603	94.0279	156.697	151.212	199.679	146.336	173.022	120.397	113.612	112.785	122.171	108.262	97.0907	104.542	116.587
TN923	Valdiate	HMDB0040980	C17H26O5	666.662	666.662	293.176	520.789	416.346	431.157	339.929	422.138	426.822	453.669	527.281	507.853	427.93	581.909	595.508	217.429	528.296	444.961	386.731	381.7	365.24	412.114	366.612	386.224	367.013	338.036	360.128	348.104	442.437	396.419	388.353	396.481	391.642	374.383	452.772
RP2040	14alpha-Hydroxy-4beta-deoxypaxilline	HMDB0040979	C27H33NO4	272.405	272.405	418.24	90.8005	68.0386	84.5845	110.287	102.949	93.0839	94.8473	76.7136	111.44	85.5669	107.715	79.5081	88.1676	83.9049	110.614	94.8952	115.402	101.301	139.578	117.851	110.43	130.288	104.006	92.7937	125.809	136.986	94.0627	131.845	142.653	111.746	110.18	89.8013
TN102	14alpha-Hydroxypaxilline	HMDB0040978	C27H33NO5	664.806	664.806	474.228	25.9022	35.8474	40.6996	49.7044	31.771	43.3592	38.9539	41.2277	40.8925	36.0074	50.6638	35.2952	6.92183	42.7897	28.134	44.24	27.5359	14.6943	6.86768	25.5729	23.9474	9.99091	18.9803	16.6167	29.6197	14.1636	27.2361	18.3489	28.486	22.5356	12.1027	13.1063
TN520	Brassitin	HMDB0040977	C11H12N2OS	71.9348	71.9348	203.065	10.6228	10.9879	9.66752	134.966	8.49658	10.276	104.723	110.102	9.63521	8.67658	7.87446	10.0669	55.1382	101.668	107.082	126.447	127.416	150.231	11.0112	162.394	153.062	143.803	119.386	171.616	133.333	144.427	127.118	126.53	130.2	161.448	148.473	182.811
RP1745	1-Methoxy-1H-indole-3-acetonitrile	HMDB0040973	C11H10N2O	346.042	346.042	204.111	67.8509	59.37	87.6639	122.927	68.9078	57.2783	86.5402	78.4941	104.319	152.502	112.707	108.234	90.7999	128.052	97.6076	128.828	90.295	54.5594	68.4694	96.7046	117.826	127.637	104.023	92.7413	116.873	91.1723	98.6447	107.126	146.492	291.28	223.931	172.356
TN583	Arjunolic acid 3-glucoside	HMDB0040941	C36H58O10	421.79	421.79	651.41	25.3249	25.5659	20.3808	21.7045	21.1644	19.5358	23.1072	22.7232	22.5836	22.6649	19.929	19.6109	18.9625	21.8483	22.1438	21.2364	19.3359	20.406	18.0085	20.0734	22.1579	20.251	20.4872	19.9467	20.7482	21.2181	19.5913	17.3455	17.9584	18.4347	17.0908	19.879
RP726	Capsiamide	HMDB0040940	C17H35NO	839.612	839.612	292.26	39.8371	24.0869	55.6975	23.9971	55.2463	49.8125	47.023	50.2526	61.2328	52.6948	34.4685	32.4199	25.1201	45.1015	12.998	19.2016	11.1472	13.3785	23.9167	17.7375	10.3887	13.5298	18.4314	15.4186	16.4108	9.78967	12.277	8.18393	7.14	9.87033	10.9942	13.8217
TN2294	2-Carboxyarabinitol 5-phosphate	HMDB0040924	C6H13O10P	94.2583	94.2583	314.986	132.549	76.7485	113.652	63.3494	132.28	71.9179	116.819	75.1945	104.22	50.9802	103.354	74.8342	86.9403	64.6183	118.519	78.0254	76.9874	97.3356	122.924	85.0213	140.192	62.592	130.369	83.6063	95.2731	98.9849	74.2592	145.058	85.3136	95.6908	139.473	91.9924
RP2126	Diepomuricanin A	HMDB0040921	C35H62O4	313.572	313.572	569.451	37.8812	35.426	32.4675	31.9718	32.6471	34.3291	33.8286	34.5872	36.7051	38.8472	30.2537	34.7967	30.4751	33.9833	31.4718	32.6439	35.9583	38.2231	40.1052	35.8892	31.2112	36.4764	35.8738	37.4899	34.2875	32.5809	40.9642	35.2537	34.9759	29.7029	30.7134	29.0513
RP2799	Brassica napus non-fluorescent chlorophyll catabolite 3	HMDB0040917	C34H38N4O8	373.197	373.197	631.272	140.899	250.641	201.884	390.297	283.005	274.607	268.295	195.63	496.424	589.911	615.271	590.688	530.118	497.978	440.756	477.004	206.876	42.5138	188.611	277.413	237.659	420.508	91.3592	162.315	459.052	409.851	337.108	617.606	633.126	633.808	489.35	374.692
RP3123	Coixinden B	HMDB0040906	C13H14O4	443.207	443.207	252.127	103.787	98.1242	70.6166	103.779	95.7448	94.4237	73.2524	73.1671	110.325	106.119	119.294	139.211	122.024	127.294	115.168	136.052	78.9923	45.4791	90.0572	82.8907	86.1548	91.2583	51.6122	82.1267	123.291	102.596	71.3371	127.23	221.739	176.616	134.099	102.569
TN364	13-Hydroxy-9-methoxy-10-oxo-11-octadecenoic acid	HMDB0040901	C19H34O5	962.018	962.018	365.229	109.865	44.8051	80.3333	56.8302	41.135	52.3192	59.99	51.8282	28.4481	34.0237	29.6307	43.8127	15.9313	25.6916	22.745	26.829	134.881	146.34	85.6116	56.2959	38.5696	47.5538	63.4671	41.3108	133.466	114.781	106.771	116.6	101.052	103.095	97.1808	125.055
TN12	(±)-(E)-13-Hydroxy-10-oxo-11-octadecenoic acid	HMDB0040900	C18H32O4	1077.45	1077.45	295.227	169.313	214.757	226.125	267.363	233.479	198.985	299.242	119.267	161.784	124.329	124.412	160.164	163.998	143.931	194.998	98.2366	50.5096	58.2877	80.9597	55.8048	57.8266	47.9325	34.4089	24.6425	28.858	24.6199	28.1717	26.6986	93.7048	27.0754	15.8934	11.2224
RP3246	(S)-Nerolidol 3-O-[a-L-rhamnopyranosyl-(1-&gt;2)-b-D-glucopyranoside]	HMDB0040844	C27H46O10	857.203	857.203	513.304	130.033	82.4623	202.254	171.481	167.249	208.065	198.088	190.038	192.272	153.619	122.561	146.746	188.965	116.15	132.174	169.587	161.031	181.238	192.165	170.705	197.519	114.961	130.101	112.632	129.053	146.269	166.981	100.737	140.364	139.769	150.05	100.724
RP1894	3-[4-Hydroxy-3-(3-methyl-2-butenyl)phenyl]-2-propenal	HMDB0040833	C14H16O2	307.761	307.761	234.147	34.537	26.5605	28.2992	29.6339	23.9955	23.2004	51.56	24.9051	32.9953	30.8758	28.2906	34.9474	33.7593	41.2338	29.5481	30.3116	26.8075	25.3449	36.3621	26.3274	31.9805	24.2776	23.5855	27.4659	34.5176	22.9432	32.4637	22.9944	125.831	129.826	133.213	105.635
RP752	Tsangane L 3-glucoside	HMDB0040824	C19H34O7	823.453	823.453	397.22	73.5958	107.174	97.6741	62.0764	102.058	64.357	65.1715	58.6566	54.7875	41.9219	62.6961	63.1924	66.4791	51.205	64.5558	53.8725	11.846	12.6287	17.6574	14.8823	2.66418	4.86709	10.805	4.24644	7.09799	3.84535	4.22696	4.45531	7.08402	10.3462	37.0389	49.5664
RP925	Nb-Palmitoyltryptamine	HMDB0040815	C26H42N2O	579.304	579.304	421.316	1770.25	1705.42	3314.44	2265.48	3070.44	1730.7	2047.19	2921.23	2519.08	3271.63	3145.38	3337.43	2514.42	2001.7	3806.02	4255.02	899.987	1435.1	2006.88	653.103	3114.9	1350.23	894.031	1559.92	1602.46	1407.63	1055.96	1050.16	871.771	897.57	1507.19	1550.75
RP2900	Isosyringinoside	HMDB0040814	C23H34O14	372.814	372.814	552.23	226.53	219.853	181.717	384.513	209.979	189.596	179.176	185.107	270.44	126.072	462.599	242.533	683.703	170.149	249.004	425.597	357.896	222.732	309.203	325.155	378.045	400.18	257.763	411.328	948.95	218.37	74.4464	748.197	500.276	167.487	52.0346	128.715
TN2316	Natsudaidain 3-(4-O-3-hydroxy-3-methylglutaroylglucoside)	HMDB0040812	C33H40O18	74.8347	74.8347	763.19	47.1054	894.933	606.817	864.998	70.6985	58.9938	365.988	492.484	88.6002	3381.68	1035.75	157.568	73.9966	1575.97	542.102	244.181	90.5537	22.8532	27.6382	1038.01	254.74	2630.48	65.9815	289.089	72.5429	37.549	46.7017	46.512	75.2385	471.45	81.3176	813.698
RP2850	Dehydropipernonaline	HMDB0040811	C21H25NO3	78.5589	78.5589	378.144	61.1095	59.7187	71.1858	68.8751	102.943	102.494	99.8985	80.9277	86.6063	85.7281	80.9055	68.293	64.8097	77.5466	86.3308	84.6222	72.5366	76.0717	76.1664	88.0834	92.3502	61.2076	57.0843	68.9411	108.117	88.0458	84.6493	94.1388	91.726	70.2966	46.6935	84.4527
TN693	Dihydroxyacidissiminol	HMDB0040792	C25H33NO5	1088.29	1088.29	410.237	529.673	275.211	349.033	136.451	595.381	818.489	478.52	492.698	717.332	291.311	378.507	471.247	130.535	316.836	490.25	330.337	188.353	424.302	292.686	161.649	173.47	102.203	199.199	163.202	336.16	426.47	392.914	220.916	362.002	388.998	376.074	244.252
RP3156	Zanthobisquinolone	HMDB0040786	C21H18N2O4	619.074	619.074	345.123	378.179	308.528	498.354	446.643	320.204	252.414	424.902	442.943	216.538	785.096	366.594	650.814	237.08	523.16	350.285	568.77	452.007	709.888	868.547	486.439	947.78	371.563	410.469	653.09	437.637	364.698	353.971	288.578	428.06	412.516	396.612	370.316
TN1880	Neoacrimarine E	HMDB0040767	C35H35NO9	257.611	257.611	652.18	80.0111	21.4034	22.3635	20.1834	21.3989	19.089	17.8748	18.9879	21.869	20.3002	26.8124	19.7499	7.46388	24.9209	24.9129	23.4292	19.7431	24.4016	23.7069	19.9431	25.3649	20.6709	28.8171	21.18	27.7096	21.7958	19.308	22.7761	78.3213	27.7521	47.193	32.5242
TN1424	Haematopodin	HMDB0040734	C13H12N2O3	222.656	222.656	267.074	5050.06	2644.78	8827.26	2959.61	5355.17	2565.12	8040.69	2341.33	4216.27	3655.67	4659.41	2274.34	1496.91	3475.9	4269.86	1826.99	2297.28	3028.02	2629.6	6788.23	3780.6	1419.81	3277.53	3078.11	1688.35	3114.37	3565.14	3126.2	3885.69	3984.36	4948.72	3218.06
RP835	10-Eicosene	HMDB0040709	C20H40	537.392	537.392	303.307	6.39018	14.9157	6.1797	10.4988	11.0532	11.812	11.8351	5.40961	11.846	5.69621	6.97815	5.61061	8.016	5.85751	5.58789	8.01987	8.02521	21.1978	13.2312	15.2716	10.5974	13.9976	11.5133	8.54232	12.1538	15.2591	12.6526	12.1598	12.4238	11.3264	9.28073	5.62115
TN57	Allodesmosine	HMDB0040704	C30H51N6O10	1231.52	1231.52	637.352	136.664	110.363	166.683	161	141.407	146.757	140.739	144.861	162.764	146.691	117.691	118.791	34.813	108.34	61.9283	70.3262	9.62217	5.00611	11.3571	10.2551	11.6164	9.39101	9.59118	4.56404	6.06071	6.28648	6.88271	5.28108	4.96065	4.46196	2.20575	3.3728
TN321	Murrayanol	HMDB0040698	C24H29NO2	1185.3	1185.3	364.226	38.1339	22.0706	21.9263	19.5425	31.3396	45.4911	26.8562	26.1965	41.1967	19.3969	25.4223	34.3241	8.40794	19.8933	27.0093	23.1282	9.07767	23.8351	19.8934	13.8441	12.4306	8.13794	8.80066	10.1125	13.9945	19.1928	25.7729	7.15386	13.5862	9.38741	15.7021	7.37089
TN2428	N2-(gamma-Glutamyl)-4-carboxyphenylhydrazine	HMDB0040693	C12H15N3O5	76.7007	76.7007	320.065	148.396	59.9601	82.3635	77.0944	117.776	86.5624	106.712	97.4628	131.288	8.99646	80.207	110.533	45.4907	10.2589	106.38	119.417	86.5784	18.765	89.5651	12.0894	106.77	27.1895	154.375	89.4408	128.166	118.842	102.26	146.343	86.1155	111.603	126.412	88.9665
[truncated: 2,144 more rows]
