# Supplementary material for: Structural characterization ofPoria cocosoligosaccharides and their effects on the hepatic metabolome in high-fat diet-fed mice
Source: Royal Society of Chemistry journal article supplement (doi:10.1039/d2fo00638c), 2022-01-01
Supplement: d2fo00638c2.xlsx [file d2fo00638c2.xlsx]

## Sheet: KEGG
Supplementary Table 4. List of efficient metabolites in liver tissues of mice from four experimental groups by HPLC-MS/MS analysis
ID	Name	Molecular formula	HMDB ID	NCD1	NCD2	NCD3	NCD4	NCD5	NCD6	NCD7	NCD8	HFD1	HFD2	HFD3	HFD4	HFD5	HFD6	HFD7	HFD8	NCDPCO1	NCDPCO2	NCDPCO3	NCDPCO4	NCDPCO5	NCDPCO6	NCDPCO7	NCDPCO8	HFDPCO1	HFDPCO2	HFDPCO3	HFDPCO4	HFDPCO5	HFDPCO6	HFDPCO7	HFDPCO8
TN2054	1-Methyl-3-(2-thiazolyl)-1H-indole	C12H10N2S	HMDB0034965	262.666	206.386	142.621	162.084	199.33	245.029	180.775	184.737	214.02	137.766	179.121	253.522	122.05	202.371	227.374	211.674	224.606	209.319	214.392	201.376	163.049	153.28	176.745	208.572	200.402	202.449	280.792	259.734	292.007	272.803	219.384	276.635
TN1839	2'-Deoxyadenosine-5'-monophosphate	C10H14N5O6P	1378-666-714	36.6166	42.1929	46.4758	47.542	34.2759	25.1179	40.2278	36.1628	36.8467	59.5484	45.7951	39.067	9.41513	53.34	42.1451	40.7378	31.4234	23.028	18.7241	40.9664	47.9456	47.5272	39.8875	38.4502	41.7467	35.8915	36.7559	40.4637	43.3838	96.5529	62.2831	74.905
TN1866	2-Feruloyl-1,2';-disinapoylgentiobiose	C44H50O22	HMDB0030336	2.61463	153.84	52.0859	16.516	10.5709	8.53375	16.6617	28.7055	10.7633	331.118	169.418	18.6264	12.4681	231.819	79.6935	12.0378	3.63732	1.77877	3.28893	78.1074	17.1481	134.356	6.16436	14.0089	6.78408	7.35271	5.60878	5.04004	4.87698	40.6609	8.31624	58.3265
TN918	2-hydroxy-2-(4-hydroxyphenyl)ethyl 3-(4-hydroxy-3-methoxyphenyl)prop-2-enoate	C18H18O6	HMDB0135786	597.035	408.123	608.861	818.245	573.151	868.777	737.693	700.477	752.49	585.394	732.184	568.653	348.134	485.679	772.209	843.43	1177.59	1149.75	905.07	910.264	574.428	916.125	750.624	866.215	826.309	1057.55	1448.42	808.093	1338.92	858.128	712.811	1171.91
TN62	2-Hydroxyhexadecanoylcarnitine	C25H47NO4	HMDB0013337	95.6288	17.1177	94.6786	82.0636	95.325	138.191	107.603	110.012	111.195	84.6942	70.1056	88.737	37.2106	74.4016	56.0285	74.6874	25.7767	29.8733	58.7545	57.4101	46.1664	20.9032	27.8507	14.6483	22.3894	19.5743	34.9393	5.51564	18.3116	14.7305	11.8901	7.67573
TN1297	2-Hydroxy-imipramine glucuronide	C25H32N2O7	HMDB0060717	81.2438	66.9823	31.2672	48.118	39.8381	60.0015	38.392	43.9852	40.0956	24.1591	25.914	52.4519	8.90572	40.2259	35.7858	44.6203	42.4289	39.7698	25.2185	22.7375	33.7243	35.6879	31.5385	32.1417	25.3365	37.7252	22.1267	40.3297	64.5282	24.2174	23.3853	15.9027
TN2721	2-Methylhexanoyl-CoA	C28H48N7O17P3S	HMDB0011660	8.84572	12.5205	11.7422	14.703	6.49003	7.33731	13.6466	6.47604	8.31457	9.21582	5.56294	6.90507	0.686848	12.8668	6.47953	8.85873	8.53919	8.35241	5.29508	9.86118	5.47848	9.01548	6.7345	8.872	8.90757	7.95287	6.88178	7.52328	5.34041	13.6934	11.0931	9.36845
RP2039	2-Methylpropyl acetate	C6H12O2	HMDB0031246	3342.45	3051.09	2500.93	2875.71	2614.53	3054.5	2817	2968.01	2731.71	2109	2797.07	3739.96	2199.21	2330.6	2326.34	2797.78	2981.19	3763.17	3433.99	2213.87	3125.82	2332.65	2596.37	3063.43	3247.76	3006.6	3167.97	2937.68	3772.38	2657.65	2418.19	2716.62
RP1191	2-O-Caffeoylhydroxycitric acid	C15H14O11	HMDB0040572	54.1797	55.1232	56.9238	60.3482	69.9995	53.2267	74.7953	63.6279	93.6444	24.1805	73.2032	64.4319	64.6102	45.9177	64.6965	87.4311	80.1515	82.1254	96.319	67.8347	91.8286	56.6681	69.766	84.7044	88.6099	92.7882	101.86	82.2342	72.6144	100.889	64.1026	88.7233
RP1108	2-Oxo-3-hydroxy-4-phosphobutanoic acid	C4H7O8P	HMDB0006801	64.362	52.8686	66.1887	62.7535	53.0673	58.2618	73.3806	65.7224	57.6248	60.6105	38.0969	54.8438	39.8815	56.9186	58.4093	53.9836	71.5809	70.8055	55.0524	84.0986	74.7594	55.7842	60.0451	59.5292	69.8195	56.8495	66.2906	67.879	63.7713	75.1295	85.0178	66.6677
TN1421	2-Oxoarginine	C6H11N3O3	HMDB0004225	9.89663	7.49824	4.98977	6.94696	7.06152	7.67319	7.65882	5.41373	6.52721	3.97003	5.20035	7.05915	4.55278	5.0084	4.94782	5.19153	8.79501	10.5434	6.45533	7.05611	4.20435	5.22718	9.06462	5.23139	6.7672	10.3236	5.86611	6.57411	8.31773	5.01317	5.06627	4.67153
RP2024	2-Phenylaminoadenosine	C16H18N6O4	HMDB0001069	65.1004	73.8954	86.7797	94.5875	72.483	60.6572	70.6986	66.4887	74.1256	28.9872	102.033	34.8121	89.673	34.5634	89.8446	31.6093	88.0503	120.814	92.9094	129.441	136.03	131.866	108.55	114.089	111.522	153.846	92.1149	99.7715	31.1697	201.713	97.5487	160.077
RP1660	2-Phenylethyl beta-D-glucopyranoside	C14H20O6	HMDB0029819	47.1173	34.8493	36.8497	39.648	70.3585	52.9269	53.2868	53.7386	158.325	86.1775	155.875	76.9493	85.862	115.878	136.668	142.851	40.3709	32.1114	48.5861	47.7558	52.4028	48.0774	58.6775	35.1424	195.92	135.539	106.832	151.659	200.697	127.338	136.421	81.755
TN2293	2-Propenyl 2-aminobenzoate	C10H11NO2	HMDB0037693	131.646	174.956	171.326	196.496	147.219	107.576	178.117	170.173	124.57	142.306	140.584	123.106	191.749	151.008	138.854	158.868	141.706	75.8565	75.0025	209.021	204.9	193.374	168.957	182.417	149.129	124.325	119.101	138.325	124.19	209.777	175.568	223.829
RP1971	2-S-glutathionyl acetate	C12H19N3O8S	HMDB0062198	125.354	54.0205	126.77	102.092	99.6822	88.7962	52.4034	69.053	63.1904	35.0668	69.0386	121.953	128.85	116.369	118.317	113.102	96.842	61.7254	128.143	49.0052	134.334	58.4355	141.981	128.058	120.102	60.4035	74.5102	89.2692	123.92	167.217	174.001	124.05
RP1795	3-(2,3,4-trihydroxyphenyl)prop-2-enoic acid	C9H8O5	HMDB0137166	762.874	1030.25	1212.49	1171.43	914.039	678.129	1108.61	1047.8	827.183	1148.51	1052.26	898.276	871.457	1207.54	1051.11	929.611	773.892	383.459	402.443	1146.28	1070.9	1318.33	864.118	959.258	667.073	456.439	530.566	689.672	633.703	1200.93	896.987	1002.54
TN917	3-(3,5-Diiodo-4-hydroxyphenyl)lactate	C9H8I2O4	HMDB0059636	9.76634	10.7587	6.56819	9.77844	10.1289	6.26077	7.60896	6.47359	7.43131	5.8966	5.25147	8.03422	8.785	7.36957	8.49702	5.21018	10.697	8.75802	10.6335	11.2754	10.6175	11.8995	10.9549	7.96407	11.7681	11.6765	12.7284	13.6999	11.202	7.80092	7.30764	1.76907
TN621	3-(3,5-Diiodo-4-hydroxyphenyl)pyruvate	C9H6I2O4	HMDB0059637	7.13566	9.85221	4.86326	6.24671	6.47751	6.84301	4.95664	6.07957	5.32965	6.50161	6.9938	5.49378	6.88134	6.0049	8.82168	6.92424	10.5432	10.5197	8.5602	9.61203	8.75151	10.332	10.7341	8.45405	10.434	7.4975	10.6004	10.0669	10.9213	9.85184	7.01228	2.52006
RP1061	3-(8,11,14-Pentadecatrienyl)phenol	C21H30O	HMDB0033862	173.998	142.287	288.384	261.465	268.34	280.02	267.783	280.159	309.973	326.61	251.61	255.852	301.505	299.96	288.243	241.875	202.239	214.042	221.356	291.408	205.389	222.319	187.403	225.104	229.078	227.524	198.73	249.052	144.57	186.55	178.85	205.179
TN1919	3-(Carboxymethyl)-3-hydroxypentanedioic acid	C7H10O7	HMDB0059932	129.78	135.404	156.753	172.476	119.739	123.108	171.404	134.415	97.0319	131.002	108.685	98.8621	29.7449	129.687	98.7609	110.416	132.368	98.323	119.797	129.002	134.498	124.729	107.512	123.162	112.613	117.692	115.003	118.906	174.725	166.869	148.028	149.217
TN1745	3(S)-Hydroxy-4(R),8-dimethyl-nonanoyl-CoA	C32H56N7O18P3S	HMDB0060161	7.68699	403.772	174.106	52.4722	20.1901	14.2966	46.1707	67.2138	23.9501	916.328	463.182	39.5832	18.6555	655.399	211.036	35.1725	12.6395	4.58943	4.13403	213.098	39.0799	364.041	3.81889	33.4521	5.37502	3.458	9.57525	5.72932	10.2239	121.322	8.00398	143.305
TN758	3, 5-Tetradecadiencarnitine	C21H37NO4	HMDB0013331	47.4277	22.4668	36.9969	34.9322	3.58929	38.7467	38.5632	95.884	99.834	26.2665	97.5026	104.904	92.8869	60.6166	119.491	53.3822	40.9005	34.8094	65.4	17.5413	28.9481	21.3108	29.1973	27.7689	44.7937	62.1902	61.7334	31.0392	154.048	80.4525	60.3477	46.2125
TN946	3,17-Androstanediol glucuronide	C25H40O8	HMDB0010321	622.343	928.575	1274.18	2439.86	956.109	710.097	1641.77	1777.84	972.19	197.539	2258.92	121.513	73.4365	523.143	549.1	1898.21	249.465	156.421	820.792	427.354	820.273	387.001	182.048	304.335	3322.8	196.365	723.102	440.408	1446.56	491.974	221.428	427.61
TN627	3,28-Dihexadecanoyl 20(29)-lupene-2a,3b,28-triol	C62H110O5	HMDB0041184	8.45843	6.31823	5.79804	7.04744	5.94759	7.51431	5.92536	8.44657	7.66527	8.75063	6.03548	8.22381	6.769	6.68953	9.42927	9.47268	8.17355	6.11045	6.43785	4.95233	6.36251	3.93725	5.79813	5.87192	5.44087	7.67156	6.24595	6.03222	6.8308	5.69237	6.25312	7.30396
TN1159	3,3';-Bis(4';';-hydroxyanigorufone)	C38H22O6	HMDB0031234	220.945	80.971	760.553	119.298	312.435	53.2578	670.214	56.9942	173.805	117.214	221.725	40.3984	52.41	96.1895	191.148	44.3656	46.5812	30.058	68.0206	329.793	190.069	18.4024	94.0898	36.2811	20.1556	91.942	43.9479	101.35	177.38	139.02	324.433	102.364
TN1563	3,3';-Dithiobis[2-methylfuran]	C10H10O2S2	HMDB0040201	59.0291	72.8801	34.5399	55.1227	57.9905	57.3483	40.7359	56.3351	60.1083	35.0895	32.188	55.0983	51.3122	50.5283	63.8925	60.9302	57.5367	72.3244	65.6163	53.9893	51.1741	47.3287	55.866	55.3498	63.6957	66.2818	59.2475	62.9388	75.2586	53.7068	58.9646	55.4432
TN1918	3';-Sialyl-3-fucosyllactose	C29H49NO23	HMDB0006606	16.3545	7.5982	16.6055	9.72571	6.08581	9.53057	11.9965	11.4551	15.1478	8.84757	11.1164	6.86005	1.518	12.5933	13.3449	13.0871	9.95606	13.1414	8.77436	11.9746	10.772	7.58766	12.7941	7.93118	11.7346	19.2649	11.766	9.2666	14.2315	15.382	14.6075	6.93608
RP1273	3'-Aenylic acid	C10H14N5O7P	1098-661-708	1018.36	1296.23	1591.66	1659.73	1465.85	1460.15	1707.37	1657.33	1161.94	1307.5	1190.2	793.917	898.924	2091.71	1027.53	1122.25	1386.69	965.143	742.807	2448.18	1011.48	1082.72	826.78	999.727	1163.34	1192.73	937.133	1167	675.494	704.137	771.19	836.759
RP1515	3-Allyl-1-cyclohexene	C9H14	HMDB0061784	220.022	145.616	209.269	212.531	216.901	218.254	217.74	223.051	190.498	158.986	172.729	160.871	179.755	139.172	159.478	194.406	236.953	290.621	262.903	296.466	239.849	198.854	259.557	251.39	240.31	238.994	281.786	165.855	198.527	237.796	262.78	262.529
RP3313	3alpha,7alpha,24(S)-trihydroxy-5beta-cholestan-27-al	C27H46O4	HMDB0062208	44.4647	21.3674	51.6943	98.4871	49.2336	59.5745	39.3779	57.1809	188.847	94.5924	318.388	77.5802	234.236	93.8328	226.768	281.697	154.785	70.1263	203.171	170.111	201.85	164.534	78.413	146.96	160.585	65.2476	57.5375	95.0016	89.0133	43.5692	41.2294	51.0963
RP437	3alpha-Acetomethoxy-11alpha-oxo-12-ursen-24-oic acid	C33H50O5	HMDB0036673	98.2507	110.353	102.087	101.887	136.333	130.744	124.359	161.05	171.85	203.17	238.172	179.661	306.439	266.664	331.508	292.843	379.401	351.62	444.285	389.444	293.127	455.739	321.548	443.345	365.113	361.722	396.257	390.404	282.229	394.655	338.598	469.097
RP1782	3beta-Acetoxy-19alpha-hydroxy-12-ursene	C32H52O3	HMDB0036404	13225.8	15376	19180.9	15152.5	16200.9	15381.5	15946.7	16157.7	12464.2	13264.9	12537.8	13757.3	15350.4	13144.4	14385.1	15865.3	17456	25742.8	20383.5	37712.9	35702	23382.9	26624.3	30181.3	19487.8	20162.2	19918.5	11898.6	15778.9	14973.8	17000.2	15767.4
TN924	3-Chloro-4-(dichloromethylene)-2,5-pyrrolidinedione	C5H2Cl3NO2	HMDB0034897	29.3525	23.4388	18.24	18.1115	18.8109	17.8823	14.1978	14.6974	15.4214	14.4604	14.9354	14.8151	18.9877	16.5679	15.8034	15.3978	19.3419	19.1693	23.9291	21.874	22.8728	20.498	21.504	21.7472	21.4527	20.8571	21.2346	20.6292	23.8995	20.6938	19.9828	9.01286
TN1564	3-Chlorotyrosine	C9H10ClNO3	HMDB0001885	35.9738	38.7627	31.3378	51.3635	26.1163	26.7278	20.492	27.4272	25.6034	45.3513	31.4094	38.3699	16.3831	48.7511	26.0592	46.2999	28.933	36.1447	21.6234	52.9517	28.2449	35.1839	31.8489	28.2966	53.9638	32.4289	51.2755	34.7439	25.591	50.2276	31.4524	38.3648
RP1831	3-Deoxy-D-glycero-D-galacto-2-nonulosonic acid	C9H16O9	HMDB0000425	502.172	452.637	610.871	508.448	899.274	994.487	1187.68	861.605	842.116	990.32	625.688	528.12	556.282	464.572	459.17	478.949	479.899	807.372	863.581	1139.5	627.776	402.196	493.15	631.941	553.455	742.804	859.338	693.866	655.944	692.431	624.784	771.899
TN325	3-Formyl-6-hydroxyindole	C9H7NO2	HMDB0031172	3.98749	3.23713	3.48708	4.39333	3.05928	3.0205	4.67949	3.3641	4.10912	4.30309	4.27878	4.04939	1.92786	4.64361	4.62974	4.08668	5.08246	4.51072	5.01189	4.59942	5.02405	5.76264	5.98499	4.93873	6.53603	5.9735	5.22174	5.33267	4.91753	7.27083	5.77748	7.24231
RP3420	3-Hydroxy-11Z-octadecenoylcarnitine	C25H47NO5	HMDB0013339	222.466	113.297	153.334	251.526	220.306	294.378	180.907	195.631	200.294	71.2864	104.268	383.917	132.796	98.9244	114.476	134.081	180.834	263.087	258.521	188.677	171.234	167.026	236.247	155.709	113.223	287.94	260.019	124.071	299.961	107.811	149.792	82.5697
RP3264	3-Hydroxy-5, 8-tetradecadiencarnitine	C21H37NO5	HMDB0013332	488.793	47.8954	63.2672	59.0254	129.582	58.1074	54.8253	73.8109	55.2197	41.5565	34.4216	41.0428	51.9741	46.5951	44.6187	42.4982	53.6993	55.5508	82.3933	96.1113	72.5326	58.2496	49.3207	60.8057	162.302	56.4198	87.0056	18.9878	206.174	82.3905	129.843	87.9948
RP1139	3-Hydroxy-cis-5-tetradecenoylcarnitine	C21H39NO5	HMDB0013330	103.902	141.692	168.168	17.6501	175.45	46.808	50.2878	81.1202	101.146	93.2794	126.089	86.1789	76.268	111.413	105.294	102.359	61.6081	53.6871	50.4149	53.5357	72.3208	70.2813	102.396	62.9506	48.6961	64.6099	53.3196	36.8164	50.2106	36.5086	43.2323	18.8963
TN16	3-hydroxydecanoyl carnitine	C17H33NO5	HMDB0061636	31.2534	44.7043	49.2686	54.3213	45.4634	36.4224	30.1436	61.2955	30.7921	21.2024	23.9493	31.1271	35.2482	25.5051	41.3941	18.0248	4.75736	8.5751	12.6232	9.44379	8.4215	7.27864	4.29896	2.98016	2.82288	3.05993	3.35629	3.29965	4.32172	4.00992	2.05835	1.13075
TN1418	3-hydroxydodecanoyl carnitine	C19H37NO5	HMDB0061638	0.625247	0.709339	4.21985	1.349	1.93526	7.68367	14.96	0.771153	4.10867	3.01955	7.4209	118.268	181.362	69.2131	127.488	7.75953	23.664	25.286	24.0378	29.1387	43.7965	17.6198	22.6653	24.91	11.2102	7.07583	13.574	3.22778	31.5175	19.8365	13.7161	16.8102
TN2245	3-hydroxyguanfacine glucuronide	C15H17Cl2N3O9	HMDB0061096	86.489	121.632	55.5026	73.4828	113.994	108.386	50.7099	85.2016	102.767	83.5275	64.7183	112.223	88.3699	115.611	101.821	66.4125	88.2524	118.996	53.0354	115.696	67.6073	110.77	75.3721	104.142	111.732	83.3064	112.59	89.1236	107.6	88.0603	93.9309	123.077
TN1657	3-Hydroxyhexadecadienoylcarnitine	C23H41NO5	HMDB0013335	5769.04	3523.79	6779.6	4584.59	4263.67	5264.05	6037.02	4661.38	1039.56	1267.58	670.276	1114.21	312.586	874.721	620.844	745.019	3744.7	3320.18	2889.06	5515.21	4611.94	2268.35	3199.04	3247.92	770.753	625.468	1241.01	396.801	909.417	858.259	713.34	801.752
RP2419	3-Hydroxymugineic acid	C12H20N2O9	HMDB0033927	314.722	221.224	559.202	359.486	421.461	365.189	367.79	441.059	544.458	447.683	473.387	270.655	434.67	307.147	366.754	529.352	279.761	424.445	273.406	586.888	375.178	355.534	322.583	449.091	297.908	259.308	387.991	265.853	552.138	477.266	407.905	432.608
RP1778	3-Hydroxy-N6,N6,N6-trimethyl-L-lysine	C9H21N2O3	HMDB0001422	23.3483	66.8768	45.1959	57.7884	70.0319	111.877	100.053	58.02	66.0222	103.197	94.6496	115.215	72.8387	123.227	96.3062	143.706	50.9507	37.4896	48.1149	109.436	63.4134	111.151	96.0586	48.6879	36.2685	109.508	81.8418	50.6915	72.017	85.4091	54.8633	100.163
TN1699	3-Hydroxypimelyl-CoA	C28H46N7O20P3S	HMDB0012155	14.9838	11.7124	10.5927	13.2127	13.3511	6.3435	16.7047	8.61194	18.8618	8.35378	18.2632	9.90717	9.37307	12.3475	19.7322	8.88464	19.31	7.04131	14.6972	19.5323	9.33682	21.7985	10.1083	11.4743	7.49447	18.3035	8.33175	10.3281	11.0485	10.7077	7.21812	14.5919
TN2765	3-Hydroxytetradecanedioic acid	C14H26O5	HMDB0000394	52.9662	21.353	15.2538	15.8264	21.5529	27.8251	21.5787	21.7117	4.44014	1.90249	10.1207	41.3768	6.04456	4.21137	6.09258	13.2337	24.6526	29.6815	38.0598	7.50522	3.01069	1.21551	33.8246	20.4778	7.56948	13.4984	9.4223	7.69042	13.4382	4.47402	4.17754	7.05281
TN754	3-hydroxytridecanoyl carnitine	C20H39NO5	HMDB0061639	33.8063	179.755	106.59	143.616	110.764	108.523	127.155	125.507	127.326	102.168	41.6238	50.2378	13.9629	38.3148	35.3949	36.5992	25.2759	36.1666	56.13	16.0381	20.0773	13.6507	16.9996	18.8934	24.6813	44.2155	36.374	23.1711	93.6067	44.1033	36.0799	34.8138
RP119	3-hydroxyundecanoyl carnitine	C18H35NO5	HMDB0061637	13.2421	253.794	140.486	189.961	184.744	206.064	203.249	175.745	192.194	165.676	170.57	184.809	203.017	103.057	160.043	145.392	18.373	26.0213	24.8681	19.8431	20.3354	23.2936	13.4957	38.9377	13.3386	17.7864	8.05169	25.6784	13.9456	15.0348	7.32944	7.73548
RP1712	3-Isopropyl-1,2-cyclopentanedione	C8H12O2	HMDB0039681	25.9456	27.5255	38.4483	43.693	30.9167	24.2289	32.9216	30.0569	36.5832	59.2027	45.8787	35.5025	27.5795	36.6728	43.4648	41.6424	34.6713	23.463	22.8555	44.085	48.1679	58.7605	45.3469	43.3574	45.509	35.7014	39.3047	40.3204	42.7082	101.676	77.0817	80.2987
RP2426	3-Methoxy-4-hydroxyphenylglycol glucuronide	C15H20O10	HMDB0000496	152.899	1095.37	1110.02	676.752	292.767	162.633	552.266	592.785	257.776	2731.11	1326.41	233.373	302.247	1535.45	641.239	307.211	216.643	161.818	112.614	1143.35	353.568	2225.24	209.181	370.689	228.354	222.126	196.412	169.994	77.7019	429.263	206.896	467.225
RP2532	3-Methyl-3-hepten-2-one	C8H14O	HMDB0031590	28.4757	36.6629	24.105	45.3989	34.2879	39.2182	29.3883	26.2315	61.5379	59.4223	65.8574	82.4206	56.4276	61.8708	50.7875	61.5451	30.1663	12.5621	24.3381	30.6028	34.1763	40.9627	19.5514	21.9379	58.456	48.2334	39.1911	65.901	86.1925	69.6066	58.1375	43.8891
RP2283	3-Methylcrotonyl glycine	C7H11NO3	1267-84-93	26.7759	31.1595	53.9349	54.748	36.5797	35.5619	48.2396	54.6012	38.8602	78.7629	32.755	29.6741	44.3418	58.7371	42.419	44.9281	43.47	31.8238	31.5957	70.7754	42.9905	52.8514	29.3045	53.467	27.5054	20.4691	27.019	24.7608	33.2757	46.7345	46.9429	37.6978
TN1008	3-Methylglutarylcarnitine	C13H23NO6	HMDB0000552	30.2352	30.8258	29.4503	27.6396	29.7332	31.0848	29.2406	29.5899	29.2548	30.8336	29.7093	27.594	28.6886	26.3107	25.6956	24.0862	24.7433	24.7407	24.4487	27.0758	24.0127	26.7454	24.1664	26.7628	21.3307	25.1753	28.6496	26.9462	26.0142	26.1158	27.6577	27.3478
RP977	3-O-Sulfogalactosylceramide (d18:1/18:0)	C42H81NO11S	HMDB0012314	62.0016	62.6953	67.6251	68.8886	75.7837	68.8359	74.7659	70.3194	75.436	82.0428	79.3401	73.1948	74.0915	74.5993	71.5216	78.6584	76.3945	80.8227	90.2862	83.016	93.0887	78.8086	87.015	85.4527	92	79.7743	92.3046	89.2002	82.3775	78.5159	74.0774	85.0973
TN622	3-O-Sulfogalactosylceramide (d18:1/18:1(9Z))	C42H79NO11S	HMDB0012317	6.30733	2.64336	11.1321	9.76734	5.29729	2.13985	6.07679	4.52009	6.77084	29.6195	20.6809	5.55385	0.319603	16.5703	23.1699	16.3185	16.0789	20.8153	6.33981	20.8106	45.0841	41.9102	61.0255	33.8666	37.9343	67.0854	24.0032	17.1127	6.70267	68.1467	67.9695	51.9625
TN1565	3-Oxoadipyl-CoA	C27H42N7O20P3S	HMDB0060378	21.0423	22.7762	22.2895	22.8002	18.2678	15.0837	22.6853	13.5026	16.0308	18.9071	18.369	16.8725	18.3984	23.6746	18.2037	14.3039	15.9481	15.6816	17.2202	20.0374	23.1451	25.7719	17.0827	15.35	16.2515	11.396	11.7342	29.8858	14.6046	14.7068	12.2844	17.0006
RP949	3-Oxododecanoic acid	C12H22O3	HMDB0010727	61.9262	48.9449	58.8152	49.8555	44.4947	48.7479	61.3363	56.7665	33.2991	45.5561	31.5794	45.7298	34.7807	40.2701	27.266	36.4199	46.9871	33.2339	54.8947	40.8221	27.2585	25.6094	34.9565	34.0798	21.9508	26.4561	30.289	16.709	27.1283	16.3816	24.3641	20.9034
TN2125	3-Oxotetradecanoic acid	C14H26O3	HMDB0010730	201.113	71.7379	83.1263	71.93	75.8485	74.0998	74.1631	74.9001	29.3396	16.8845	41.95	60.0451	22.8695	22.1073	25.1342	31.3998	135.196	164.379	129.313	71.3004	42.8593	27.2059	140.671	83.8649	46.1845	47.9402	43.7817	23.5729	32.4148	16.8044	15.7652	14.6886
RP662	3-Oxotetradecanoyl-CoA	C35H60N7O18P3S	HMDB0003935	29.541	31.3952	28.7993	29.5267	31.1204	34.4944	31.1795	33.9959	32.5933	33.3323	27.9609	23.2119	32.882	20.1763	34.5748	33.2437	42.7074	36.331	39.8467	38.4239	34.9088	33.4325	42.4659	42.1941	40.1866	37.151	38.0117	41.4634	37.4596	25.9643	36.0538	39.171
RP203	3-Sulfodeoxycholic acid	C23H38O7S	HMDB0002504	430.109	507.619	407.013	477.119	492.855	477.258	432.533	460.585	469.89	576.881	509.504	419.455	448.779	529.56	498.04	518.964	328.49	320.846	337.716	405.42	416.131	461.399	410.859	402.818	376.627	296.433	357.566	302.214	339.119	387.033	328.428	392.24
TN1815	3-trans,5-cis-Octadienoyl-CoA	C30H48N7O16P3S	HMDB0002185	6.28102	41.92	28.0418	21.6778	7.09668	3.80905	11.7907	21.5613	9.81927	87.4343	35.1977	7.51595	7.41921	67.429	32.58	20.148	8.55551	2.96406	4.86339	33.8517	10.8072	41.3875	2.91449	17.2704	3.53176	3.94068	8.36192	5.11835	5.61953	22.6542	6.66942	40.1252
TN1393	4-(2-Nitroethyl)phenyl primeveroside	C19H27NO12	HMDB0031742	59.3215	31.0084	57.6849	31.5744	52.2085	14.9657	58.389	20.379	58.6387	30.847	68.1694	17.8647	29.2832	32.1681	55.3364	29.0135	62.5767	27.0833	55.2656	62.9751	99.0973	28.1143	69.8251	69.1955	38.3915	70.807	34.7492	56.3586	65.3188	52.6588	70.404	68.1333
TN925	4,4';';-bis(N-feruloyl)serotonin	C40H38N4O8	HMDB0041433	12.2986	16.1937	12.424	11.1707	14.691	8.34415	12.9691	11.3158	16.9667	13.0685	15.5213	12.9464	2.21536	16.438	10.2776	16.2693	22.5976	13.3127	12.9618	15.3496	19.9848	17.1557	22.2484	18.47	12.5861	18.5223	14.2341	15.1962	18.0546	18.4364	18.668	12.5338
TN2751	4,5-Dihydro-4-hydroxy-5-S-glutathionyl-benzo[a]pyrene	C30H29N3O7S	HMDB0060391	222.107	264.331	348.979	246.772	283.471	129.966	399.606	136.832	435.25	163.643	400.213	138.983	198.562	205.336	423.219	188.685	332.791	132.645	469.643	303.15	358.56	565.592	319.466	250.017	106.622	379.623	143.921	319.772	201.406	202.031	321.832	216.225
RP1223	4,6-dihydroxy-3-(3-oxo-1-phenylbutyl)-2H-chromen-2-one	C19H16O5	HMDB0140987	30.342	26.973	40.2696	35.0826	36.8358	35.8558	42.327	40.1583	36.8541	42.7107	22.9784	34.9254	31.8722	30.649	32.5723	38.4617	94.7359	82.3715	70.1697	57.3532	66.1989	54.8985	72.9599	58.9575	39.4177	39.2885	34.4481	34.1705	20.936	31.1634	25.5217	27.8505
RP1266	4,6-Heneicosanedione	C21H40O2	HMDB0035571	55.8405	53.5228	73.9532	62.6041	57.514	60.4911	61.7828	56.5151	43.4426	61.2705	58.8394	58.6727	42.3334	69.1745	34.8928	48.4127	99.6607	79.8623	124.519	100.827	101.559	73.0364	71.058	106.401	72.4686	62.3552	68.159	40.4081	52.4319	54.5862	53.7486	71.0941
RP1405	4,6-Tricosanedione	C23H44O2	HMDB0035565	4578.06	6786	6360.96	5545.66	4991.52	1571.79	1038.37	1007.49	1047.12	991.207	1003.08	1031.37	1036.52	1104.89	986.408	1060.82	847.822	838.336	945.163	968.629	887.413	892.685	876.49	937.053	973.482	808.967	757.343	728.238	801.108	737.238	765.372	780.005
RP180	4,8 Dimethylnonanoyl carnitine	C18H35NO4	HMDB0006202	57.4233	874.071	743.936	917.541	877.853	794.091	853.301	827.807	933.944	827.344	756.475	694.115	925.578	756.785	725.025	652.925	309.756	382.915	437.796	486.334	399.973	336.889	211.253	377.564	253.297	295.494	204.283	203.044	147.484	144.181	175.964	191.81
TN2068	4';,4';';-Dihydroxyanigorootin	C38H22O8	HMDB0039973	333.422	296.919	317.63	391.282	234.206	231.681	452.506	239.039	213.688	204.373	138.778	185.125	15.453	250.172	259.682	189.869	297.275	204.35	118.075	323.709	271.57	147.082	146.181	173.923	190.162	170.148	178.538	192.884	205.954	298.889	312.979	198.214
RP943	4';-hydroxytrazodone	C19H22ClN5O2	HMDB0061060	202.426	143.771	222.337	208.017	191.131	184.986	190.746	180.534	143.452	199.931	174.933	168.92	171.109	179.328	149.453	164.173	200.191	153.544	152.656	218.317	194.437	160.781	170.859	133.124	148.55	99.9209	146.764	96.2171	136.091	139.308	148.468	155.787
TN638	4-Amino-3-hydroxybutyrate	C4H9NO3	HMDB0061877	107.503	52.2302	91.4311	99.7474	83.5182	76.7873	118.516	120.743	147.756	96.9627	123.875	119.272	76.2509	108.868	119.744	154.328	162.953	136.108	180.483	107.167	156.099	98.4191	124.907	132.705	146.629	194.742	177.951	151.412	166.767	176.398	140.115	164.502
RP1954	4-Chloro-6,7-dimethoxy-2-benzoxazolinone	C9H8ClNO4	HMDB0034577	42.1612	51.997	40.1956	51.4523	47.5896	38.6026	45.4478	60.4316	51.6588	31.02	27.2058	86.8455	48.4953	29.9977	33.8224	35.8778	43.182	72.8281	102.745	60.8912	60.3041	48.337	117.92	86.3916	58.4044	34.9823	35.476	29.3538	58.449	184.732	273.629	190.573
RP236	4-Deoxyphysalolactone	C28H39ClO7	HMDB0034346	109.004	52.7868	107.406	116.547	113.171	123.653	118.423	150.687	94.8796	107.625	85.6873	101.22	84.6421	136.415	92.083	115.808	53.4021	37.7383	89.2643	55.5471	38.6778	35.3322	9.75814	25.7563	25.54	11.9053	13.4792	8.76236	6.08405	13.7135	20.8327	11.3324
RP754	4-ethyl-6-methoxybenzene-1,2,3-triol	C9H12O4	HMDB0125593	202.589	134.634	231.695	219.207	168.472	203.328	236.687	208.955	235.461	208.386	224.892	200.369	209.589	210.917	209.993	252.676	254.013	254.552	240.226	253.201	247.631	218.022	263.071	243.064	275.522	236.829	272.335	191.933	276.544	289.711	305.647	200.289
TN1415	4-Glutathionyl cyclophosphamide	C17H30Cl2N5O8PS	HMDB0060387	23.97	92.5352	113.173	89.607	37.8575	12.5129	77.3768	63.1606	24.5205	160.731	113.62	45.4222	22.9716	157.328	91.4249	29.695	17.8937	8.69629	11.319	114.099	54.0454	93.9629	17.2895	46.6971	10.6434	14.1853	9.39691	24.3163	8.38279	63.7818	13.034	76.3166
RP2531	4-Hydroxy-3-(16-methylheptadecyl)-2H-pyran-2-one	C23H40O3	HMDB0032093	133.275	195.793	92.0485	166.371	124.955	130.171	216.193	110.232	261.179	122.801	264.958	168.005	188.88	243.651	134.025	265.589	140.216	108.616	213.514	193.532	191.62	171.954	135.219	134.21	428.305	138.057	157.588	227.67	1065.09	389.533	219.131	284.325
RP2281	4-hydroxy-5-[3-methoxy-4-(sulfooxy)phenyl]pentanoic acid	C12H16O8S	HMDB0127778	63.8999	54.812	39.1102	48.3169	58.4693	42.4842	42.5375	44.7036	40.7599	38.2597	43.3975	52.9826	53.936	29.3362	37.6312	44.3829	49.3783	40.7336	42.7804	36.054	69.7075	50.514	46.5687	59.2645	42.5072	53.8644	46.0173	37.4506	48.1187	53.3339	49.1823	54.9202
TN1825	4-Hydroxyphenytoin glucuronide	C21H20N2O9	HMDB0060769	28.5204	308.95	359.648	200.678	48.8379	25.7282	165.059	120.421	27.6533	546.397	241.421	44.5619	12.8568	474.204	154.265	44.1416	16.7175	16.1662	17.9427	312.664	87.327	382.46	27.6532	52.566	21.7544	17.7577	17.5286	25.9395	18.3212	143.249	26.7736	122.522
TN1341	4-Mercaptobutyl glucosinolate	C11H21NO9S3	HMDB0039895	46.3664	52.2436	31.6598	89.5902	32.3187	56.705	39.1767	91.4714	51.3369	73.8473	49.7169	76.2712	21.597	97.1544	39.8549	109.588	51.5505	53.7313	29.9143	38.6883	29.781	36.4111	35.4689	30.396	54.9777	49.2146	51.8269	34.7607	50.7543	72.7781	24.5863	37.1658
TN491	4-Methylpyrrolo[1,2-a]pyrazine	C8H8N2	HMDB0033173	38.717	34.7513	39.9475	43.7258	35.5332	42.8324	36.7721	42.0324	50.5321	37.2604	54.1591	51.1347	32.9957	42.9479	45.8382	53.5439	52.1439	52.607	56.7918	47.3363	57.0182	43.0565	51.3879	52.1999	57.2729	66.0633	62.1876	53.0952	69.5661	74.9538	58.0111	59.0595
RP2553	4-O-alpha-D-Galactopyranosylcalystegine B2	C13H23NO9	HMDB0038228	69.148	51.2406	100.929	74.1252	87.8339	82.4174	86.4915	86.1069	125.527	83.717	113.188	74.1713	101.034	83.159	89.7722	105.991	68.5607	93.0011	71.5287	98.1913	80.0796	95.5893	72.5004	89.3166	68.1344	76.7572	84.6634	83.1153	108.205	113.342	90.4991	81.9762
TN2467	4-O-alpha-L-Rhamnopyranosylglucosinalbin	C20H29NO14S2	HMDB0036242	20.1822	24.3654	48.2415	27.6344	18.6177	22.1501	23.6547	18.7977	26.974	119.764	62.2752	50.4979	12.5986	59.4401	22.9321	20.6871	35.5539	17.5522	26.4031	45.6198	23.6332	102.409	17.1442	24.5469	26.9815	41.081	22.0814	35.43	22.2168	28.0279	23.0429	50.0899
RP115	5,8,12-Trihydroxy-9-octadecenoic acid	C18H34O5	HMDB0030936	18.0588	1542.59	859.388	1268.56	1123	1308.71	1358.96	1104.04	1267.04	1038.07	1056.43	1117.12	1220.71	881.958	964.759	870.603	26.0779	66.7026	77.2826	43.8816	40.7523	31.4532	36.2732	42.62	40.049	32.4721	41.9947	29.8123	30.9737	36.505	43.7836	45.6224
RP2564	5';-Phosphoribosyl-N-formylglycinamide	C8H15N2O9P	HMDB0001308	40.9551	51.4102	37.7414	41.0424	36.5525	40.6637	30.0066	35.558	42.9589	66.6169	49.6402	54.8871	58.3553	38.8049	40.8184	33.4185	43.7231	25.917	37.3044	44.0616	41.2015	64.9337	33.54	44.3365	31.7674	37.9863	26.7809	51.5488	32.6251	45.3706	41.0895	39.5158
TN577	5a-Androstan-3b-ol	C19H32O	HMDB0005830	56.4767	33.2316	53.4152	51.8277	48.9746	56.2517	70.072	71.9032	46.436	36.9311	44.6663	54.461	29.405	33.4929	37.1553	31.4309	26.5074	24.6774	27.9485	52.8324	42.4747	46.4001	50.6783	21.8062	16.7394	14.8582	20.4339	10.8306	11.8489	13.6748	10.7511	10.2503
TN1594	5-amino-1-(5-phospho-D-ribosyl)imidazole-4-carboxylate	C9H14N3O9P	HMDB0006273	570.329	295.958	176.343	353.607	161.434	225.639	261.101	218.563	166.241	158.324	185.275	172.148	197.74	193.152	209.588	193.005	240.429	188.809	221.805	212.289	240.107	237.019	216.038	244.949	235.988	242.61	231.775	248.083	437.02	247.987	341.585	294.246
RP922	5-Hexyl-3,4-dimethyl-2-furannonanoic acid	C21H36O3	HMDB0112101	19.3103	6.24047	5.74528	7.57189	7.72386	5.27184	7.49469	6.90288	6.33064	5.91182	5.46587	5.91735	5.15774	5.52079	6.06647	6.38946	219.26	164.569	718.08	485.886	446.59	362.699	203.13	559.215	933.679	360.193	605.675	155.272	1695.18	416.107	763.267	420.867
RP2036	5-hydroxyhexanoylglycine	C8H15NO4	HMDB0094722	22.8457	16.889	35.6233	35.9569	53.5698	42.8932	42.9809	25.075	18.087	35.5568	42.8063	26.3954	20.7	42.5305	34.6784	37.7437	39.904	39.3707	28.7156	47.6234	34.8109	42.4445	45.8158	44.6197	53.0061	62.1336	37.7243	40.1583	36.662	35.6054	49.1931	44.8002
TN1648	5-Hydroxyindole-2-carboxylic acid	C9H7NO3	1174-2053-2628	27.6704	13.9338	16.4415	13.7974	10.4672	9.53104	15.1103	15.7713	5.11922	4.1206	5.50842	6.38879	3.37138	6.79395	10.1175	11.2861	24.7067	9.18778	7.9898	16.9336	16.0918	12.9728	9.84575	16.861	3.51128	4.00619	4.81014	5.58002	13.4757	3.87475	2.69459	3.57045
TN980	5-Hydroxyindole-3-acetic acid	C10H9NO3	1171-1258-1395	29.0068	19.2348	20.7033	26.0269	19.7696	19.4749	14.5809	19.5136	13.6089	24.3772	23.8609	24.4986	8.96465	40.9397	23.8763	17.8578	17.2857	13.2474	14.6408	23.3411	24.9102	27.4136	11.2028	19.8588	12.2562	11.8032	17.9597	25.3277	15.9375	20.1798	11.9292	11.5216
TN1663	5-Hydroxytryptophan	C11H12N2O3	1166-736-791	65.3963	75.5444	131.4	116.411	88.6453	49.4333	101.427	71.8026	74.0566	132.272	106.709	52.2766	21.0117	101.224	94.1653	86.4587	85.2683	77.3824	48.688	163.249	131.151	133.638	124.109	108.361	135.712	139.372	104.594	117.098	66.0814	114.431	101.438	108.442
RP262	5-Hydroxytryptophol glucuronide	C16H21NO7	HMDB0013200	4.74198	14.0147	13.748	17.8425	20.2882	20.3768	19.7924	17.2718	21.8261	22.497	13.4404	16.8828	13.2409	13.1171	13.5067	15.7796	200.13	223.782	256.413	286.78	253.664	262.904	229.455	294.868	178.092	223.48	267.829	277.43	139.637	182.443	219.252	238.403
TN2009	5-Megastigmen-7-yne-3,9-diol 9-glucoside	C19H30O7	HMDB0032841	44.8098	20.8964	58.3318	44.0829	50.2476	65.8283	66.3868	94.4062	159.199	53.9382	154.87	40.1632	12.5122	174.06	366.572	319.201	54.119	25.4576	9.30953	45.0818	61.4104	45.8995	60.1971	15.4252	164.242	133.851	77.925	145.055	235.653	69.4862	73.3345	48.1964
TN1460	5-Methyl-dl-tryptophan	C12H14N2O2	1161-92-104	335.253	291.912	318.47	306.875	235.919	275.385	328.468	285.686	315.079	272.398	303.693	267.396	88.1012	317.108	282.02	339.152	299.997	297.654	268.411	313.548	278.749	268.591	286.85	276.968	321.4	337.869	338.217	254.547	357.082	367.19	317.875	281.478
TN2215	5-Methylthiazole	C4H5NS	HMDB0033117	4.68849	3.93535	3.18085	1.42383	6.87323	5.18121	1.99141	3.67838	3.16832	3.26737	1.82018	4.09129	4.83578	3.19046	6.96204	3.99478	2.88664	3.95299	1.97067	3.92142	2.98466	2.46196	3.23396	2.33376	3.84987	2.05982	6.79802	4.89866	6.24137	2.70992	4.34787	6.79717
TN900	5-Oxo-6-trans-leukotriene B4	C20H30O4	HMDB0012824	66.1143	44.635	35.0492	49.1105	21.0733	21.7461	30.668	47.4406	35.0382	59.0609	48.845	120.935	9.93547	66.2804	19.0979	56.5647	40.0089	17.2843	38.2364	23.7671	19.5073	18.5332	27.3379	24.448	32.5596	15.9854	25.4048	25.5945	22.3347	26.7444	14.9817	21.4407
TN1130	5-phospho-beta-D-ribosylaminium(1-)	C5H12NO7P	HMDB0062576	12.2828	12.516	9.99711	15.7258	8.43458	15.9796	8.23938	14.9017	16.764	9.54127	14.5355	14.7937	6.99618	14.0859	13.8805	17.2759	13.8788	12.1206	18.4306	12.0075	11.5503	10.5444	9.12794	14.8615	17.6065	18.2159	18.3495	14.8944	21.31	14.3793	17.4505	19.5962
RP1159	5S,6S-epoxy-15R-hydroxy-ETE	C9H20O5	HMDB0062236	57.3375	89.1263	70.4175	67.3942	67.0962	81.31	63.9612	64.78	61.2961	65.7301	62.0256	59.8035	58.819	66.0971	57.0658	57.3648	48.6445	49.3537	58.1517	78.0339	70.0333	66.7004	62.0295	62.9915	65.7297	59.7498	48.5598	56.2019	39.1914	50.4199	32.8358	58.165
RP2605	5-S-Glutathionyl-aminochrome reduced	C18H24N4O8S	HMDB0060086	223.862	197.024	76.5159	360.551	35.3274	191.034	374.964	343.698	54.9622	275.11	159.075	279.631	48.3748	319.267	47.9507	84.4802	427.214	110.812	252.492	96.3718	262.259	381.47	368.093	421.953	252.498	33.3957	80.4478	148.205	364.499	233.255	174.107	264.051
TN1804	5-S-glutathionyl-L-DOPA	C19H26N4O10S	HMDB0062425	172.794	2747.88	2208.24	715.206	375.325	170.607	859.762	808.532	219.323	3169.44	2282.47	322.953	280.743	2821.43	1372.54	281.77	154.162	131.981	163.898	1931.61	630.61	2226.71	199.493	485.779	166.67	140.997	158.542	157.191	126.238	1044.19	193.441	1234.9
TN2716	5-Taurinomethyl-2-thiouridine	C12H19N3O8S2	HMDB0011610	152.007	96.4519	104.739	69.67	99.6204	54.8267	131.659	73.2784	92.4497	50.707	99.5937	77.7687	45.9501	75.6584	80.5645	62.2532	86.0029	44.9028	72.3937	82.5864	95.672	81.4688	86.431	94.1221	56.1833	73.6707	80.1988	90.7368	142.935	98.0967	132.508	93.3177
RP131	5-Tricosyl-1,3-benzenediol	C29H52O2	HMDB0038524	706.188	689.672	700.931	701.227	720.829	691.805	704.674	704.294	733.429	792.226	750.578	744.639	733.07	759.069	766.591	742.876	781.897	788.499	804.682	801.463	787.513	818.642	801.532	830.467	795.921	801.783	796.394	807.68	816.716	756.212	820.75	830.938
RP5	6,7-Dimethoxy-7-epirosmanol	C22H30O6	HMDB0030844	83.8231	129.629	155.283	145.317	160.851	171.243	149.414	152.588	179.723	171.581	171.646	137.09	149.929	157.621	184.367	166.754	36.0519	39.4901	76.5289	51.1603	44.3432	40.0059	34.5674	32.8454	49.947	64.4238	50.0667	59.6499	59.0796	59.027	60.8401	52.6371
RP2102	6';';-O-Acetylvicenin 1	C28H30O15	HMDB0041235	32.7817	24.4901	55.8624	75.0853	53.1069	52.5767	70.523	60.5279	87.3944	88.3864	70.3142	63.1238	46.796	72.4111	82.1217	69.0505	64.2981	44.0965	76.1396	77.6062	43.0076	74.9281	44.6899	22.5299	50.7696	64.2334	49.76	57.0349	38.5761	76.8358	56.2693	43.3237
RP3117	6-Hydroxymelatonin glucuronide	C19H24N2O9	HMDB0060786	31.8115	24.8585	24.7728	33.1504	51.4396	30.5784	86.0636	26.1299	110.026	21.8129	150.378	47.2656	169.693	104.956	90.039	105.997	151.585	136.272	99.2665	114.793	146.279	41.3837	135.026	38.0213	86.766	33.185	56.628	29.4694	20.4021	21.4585	90.7624	17.927
TN2740	6-Keto-decanoylcarnitine	C17H31NO5	HMDB0013202	54.8949	30.5252	37.2965	41.2005	45.8623	39.1804	40.3528	49.5599	41.3907	36.439	37.1384	48.092	21.7024	37.5826	38.3278	33.0348	42.3408	44.0731	56.2187	47.1355	48.9722	44.828	45.0548	39.0971	49.013	37.2271	39.6368	22.5247	29.6025	34.9736	32.0449	24.249
TN540	6-Methylthioguanosine monophosphate	C11H16N5O7PS	HMDB0060413	60.3035	54.2245	35.6059	49.9069	44.1252	49.6723	34.7112	43.0298	50.391	33.0085	35.7944	52.9154	33.1179	49.1297	42.259	46.7347	61.9797	55.2074	49.8074	47.5184	53.8318	54.2631	51.0505	63.7265	55.929	55.5986	64.9901	59.2318	82.8905	54.0814	51.4592	62.2436
RP2855	6-O-p-Coumaroyl-1,2-digalloylglucose	C29H26O16	HMDB0039170	47.314	59.9518	88.0384	45.0506	50.6158	50.2797	69.5619	54.8964	54.2882	122.522	69.847	40.3251	45.5005	92.6267	51.1861	51.1503	59.4374	48.3225	54.5444	73.2892	46.8083	94.5561	46.1925	46.9857	41.022	60.5095	48.9188	85.2849	43.0484	55.6705	51.4412	41.1469
TN2490	6-Sinapoylglucoraphenin	C23H31NO14S3	HMDB0038405	76.0763	75.1285	77.7284	54.8703	70.0377	28.2969	76.4696	28.5626	71.919	35.6502	57.7706	35.0104	44.3699	42.8384	78.4526	33.3563	51.9068	34.448	67.9724	56.533	70.2862	82.3118	56.483	56.1061	33.896	70.9413	25.9393	64.9474	98.8607	36.2914	77.2644	44.3429
TN1671	9,10,13-TriHOME	C18H34O5	HMDB0004710	231.2	30.608	129.727	191.903	147.457	143.813	156.709	167.284	155.033	141.431	178.949	295.413	54.9289	175.629	120.711	129.594	80.5658	127.351	298.188	211.527	179.609	221.387	231.981	279.079	86.6443	187.459	109.312	71.96	115.207	99.4358	85.7893	75.4378
RP2081	9,10,13-Trihydroxystearic acid	C18H36O5	HMDB0030935	44.9474	19.0788	33.2872	35.1589	33.4066	29.4397	36.4963	41.8275	24.293	16.8256	23.8693	29.6436	24.5286	20.6817	14.4634	25.8383	65.4977	34.729	95.4032	78.0227	34.6626	26.8736	48.276	64.3329	35.1853	33.8019	33.8129	18.5756	35.2522	23.4573	30.089	23.6834	一种长链脂肪酸
TN1067	9,10-DHOME	C18H34O4	HMDB0004704	109.274	69.0296	67.1771	87.3214	70.4028	84.4381	66.005	70.9975	59.9689	47.5578	68.2762	109.811	26.7626	53.2463	38.2749	46.993	73.124	71.459	72.7077	83.2896	50.3505	41.5315	59.5803	63.0051	86.8198	107.659	80.1685	65.7488	114.785	66.2138	101.521	59.6172	PMID： 26701313 LPS可增加亚油酸的促炎代谢产物的全身和器官水平，包括白细胞毒素二醇（9-，10-DHOME，12-，13-DHOME）和十八碳二烯酸（9-HODE和13-HODE）和花生四烯酸衍生的类前列腺素， PGE2和羟基二十碳四烯酸（8-，12-和15-HETE）
RP23	Acetyl tributyl citrate	C20H34O8	HMDB0034159	306.517	557.216	530.015	547.92	580.35	573.96	553.701	577.563	609.788	586.434	508.066	495.72	562.583	537.832	553.624	440.463	146.545	201.02	171.737	296.443	219.448	191.668	180.814	223.781	269.963	162.896	174.406	128.376	144.56	89.5751	126.295	122.329
TN2544	Ac-Ser-Asp-Lys-Pro-OH	C20H33N5O9	HMDB0062552	58.3465	20.0996	25.2824	67.7994	61.5711	37.3984	35.4357	43.2018	21.1113	15.3195	23.1515	16.9771	5.68908	31.1694	43.9847	25.2353	40.5611	29.5077	58.9806	38.0488	49.2095	39.7189	72.0911	55.0246	56.2339	12.0439	4.73141	61.763	70.3463	9.42379	6.43576	10.0003
RP2917	Adenylosuccinic acid	C14H18N5O11P	1093-753-810	84.3261	483.392	509.64	744.347	326.169	135.225	496.621	275.036	253.907	830.118	1554.31	261.574	764.67	700.043	852.554	579.746	934.532	110.021	57.7266	280.841	1002.2	1607.48	464.439	388.723	783.4	753.483	252.672	675.554	132.951	744.918	695.277	388.848
TN99	Alatanin 1	C38H41O20	HMDB0041154	13.2341	6.54176	5.02062	4.33211	10.6336	9.70479	10.7072	10.8895	9.07596	6.36243	11.6049	12.2791	6.78362	20.1214	12.8279	19.4413	0.729333	2.02681	8.33449	5.37914	8.18241	4.7974	8.36102	8.07513	3.07621	1.35821	3.34826	0.78915	0.940591	1.30301	1.97671	5.29182
TN1546	Allocholic acid	C24H40O5	1076-640-687	21.489	24.6745	5.73928	48.1326	16.1383	9.76409	28.6719	20.7732	39.7169	7.68194	30.8822	15.177	5.65221	23.6794	19.4595	28.294	22.2385	32.8986	76.1332	24.2403	24.5125	25.5862	49.2815	15.3852	69.6485	17.2538	15.7084	94.0541	94.9904	18.5507	8.91106	9.68531
RP2526	Amylopectin	C30H52O26	HMDB0003255	12.4176	136.149	145.892	68.5252	20.0922	18.1182	39.795	49.5488	22.0048	491.017	214.215	25.4499	39.0343	297.346	93.1916	31.3024	13.8802	13.3551	14.9198	144.904	60.7098	326.585	26.6119	36.5096	14.7232	10.9665	18.796	16.2754	14.183	64.1312	15.1165	48.9688	淀粉中高度分支的葡聚糖
RP1618	Arborinine	C16H15NO4	HMDB0030177	349.098	194.057	266.39	318.06	271.739	262.517	348.894	238.79	212.923	196.038	195.363	157.236	164.132	191.357	214.39	255.941	271.554	235.862	205.357	189.756	183.063	183.524	153.613	208.097	250.576	267.325	185.118	184.203	228.578	158.878	189.458	177.068
RP3076	Arbutin	C12H16O7	HMDB0029943	35.2905	46.0031	34.4516	50.1947	42.9101	47.147	38.5972	35.6089	62.3991	66.0882	75.4276	80.5464	65.2673	63.95	64.912	68.7054	34.6252	25.1781	32.5648	36.7315	37.503	48.625	27.8008	34.6632	41.112	55.1836	47.6952	75.4705	73.2496	62.6228	56.4014	44.7708
RP2066	Biotinyl-5';-AMP	C20H28N7O9PS	HMDB0004220	118.603	54.911	216.944	320.228	122.806	106.517	276.407	212.159	317.161	402.97	244.489	147.089	145.192	298.65	196.807	233.961	188.186	126.026	155.262	274.707	170.506	273.86	163.235	102.403	183.51	202.302	160.085	256.574	74.7621	120.226	115.151	62.3023
TN727	Bisnorcholic acid	C22H36O5	HMDB0002082	14.2962	13.1607	16.7605	16.8686	18.5633	10.3309	14.2509	10.0303	2.50335	9.97684	7.69344	8.61609	2.0736	6.56167	4.18149	2.67852	17.4316	18.1675	18.0452	18.707	13.8555	15.4076	12.7111	11.3757	8.87769	15.394	11.6215	8.40317	12.4876	14.5106	8.10286	11.9336
TN1870	Buprenorphine glucuronide	C35H49NO10	HMDB0060928	327.42	424.569	481.219	332.884	347.312	448.008	566.981	430.923	448.345	380.149	428.567	415.969	407.467	379.879	368.125	355.36	412.408	458.975	469.987	338.577	351.271	427.247	441.115	416.407	385.471	467.754	503.874	337.929	509.591	496.48	438.661	420.411
RP3092	CDP	C9H15N3O11P2	HMDB0001546	183.886	122.497	98.9477	91.8954	201.877	192.35	142.532	158.167	199.906	40.8762	96.8221	205.123	186.713	95.9262	161.256	154.2	153.58	143.37	149.054	126.155	180.556	53.8344	187.044	181.345	179.668	159.416	177.055	203.254	191.948	176.805	168.007	136.54
TN2783	CDP-glycerol	C12H21N3O13P2	HMDB0059599	111.189	68.6783	126.38	82.299	117.587	72.5526	107.748	101.782	100.213	48.0724	94.7745	83.469	76.0285	65.6598	80.7838	90.6274	70.3145	73.9183	87.856	97.462	128.729	76.3147	112.771	89.2949	74.432	61.4017	63.4102	102.387	92.9907	87.4578	167.645	91.9052
TN1855	Cervonoyl ethanolamide	C24H36O3	HMDB0013627	21.1314	0.629771	6.83689	14.2036	14.8397	22.5382	25.9822	59.3899	55.5572	27.4641	69.7389	65.3559	23.9762	23.7817	27.4433	40.7469	15.5492	17.8685	32.7167	16.0492	20.3987	14.0407	13.1439	11.1331	20.7966	31.2591	25.5924	16.5213	47.9774	33.6646	23.9779	20.0688
RP3282	Chrysoeriol 4';,7-diglucuronide	C28H28O18	HMDB0039931	40.0482	54.5496	68.4945	73.0636	63.1849	65.7857	91.1681	77.3694	125.226	137.54	79.2324	67.2835	68.2572	92.7584	96.7907	93.107	107.295	75.4818	127.74	84.383	69.9893	118.719	69.7891	63.0545	87.8465	126.404	81.815	108.8	52.3014	66.0813	59.8833	40.2525
RP2418	Cis-10-Nonadecenoic acid	C19H36O2	952-772-831	69.1417	79.699	132.773	219.642	253.011	506.253	1182.8	54.0844	2257.39	274.858	419.43	1293.94	1145.23	1279.39	1674.51	1177.79	61.3922	173.498	133.786	196.719	113.559	58.8702	34.4025	46.1349	40.0571	30.6921	42.0802	23.8161	19.8287	21.1286	12.2914	18.3783
RP648	Cis-11,14-Eicosadienoic acid	C20H36O2	951-305-342	162.869	74.1322	217.034	132.851	179.742	142.25	204.057	200.003	165.591	191.065	146.831	151.222	112.308	167.041	66.8409	100.122	64.9097	58.9705	79.2212	75.6152	90.4635	77.2494	80.3744	76.1311	46.3233	60.2327	58.5241	38.9681	42.7467	68.5053	76.9969	37.3313
TN203	Coagulin R 3-glucoside	C34H48O11	HMDB0033207	152.452	148.128	136.175	136.218	146.615	141.975	147.031	154.602	160.725	176.889	159.24	169.638	148.007	152.695	159.258	153.816	117.326	116.004	112.943	99.0876	124.73	116.4	121.322	118.54	112.904	130.022	140.3	118.884	112.213	124.296	131.057	132.663
TN1741	Cortolone-3-glucuronide	C27H42O11	HMDB0010320	88.6315	44.2286	106.061	72.4867	71.275	103.589	112.182	91.9129	83.9374	66.5581	56.4407	57.1331	20.3324	49.1545	53.1276	57.2918	85.6251	96.9511	101.798	120.667	96.7413	49.3024	68.4725	51.4717	74.614	90.2112	105.76	49.7077	94.9935	93.3189	70.0789	48.0945
RP1473	CPA(18:0/0:0)	C21H41O6P	HMDB0007004	693.668	298.106	439.301	462.764	569.304	699.937	401.056	485.446	307.961	226.939	209.132	269.073	337.337	224.356	171.323	299.358	612.92	819.554	1388.04	943.026	911.263	507.499	748.768	780.603	745.785	593.21	726.797	209.916	669.284	484.002	611.923	444.664	cPA（18：0/0：0）是环状磷脂酸或环状溶血磷脂酸。它是一种甘油磷脂，其中环状磷酸酯部分占据两个甘油替代网站。溶血磷脂酸可以在C-1（sn-1）处连接不同长度和饱和度的脂肪酸的不同组合。最常见的是碳数为16和18的脂肪酸。已在包括人类在内的各种生物中检测到环状磷脂酸，尤其是在大脑中，但在血清中（浓度为10-7M）。cPA在甘油碳的sn-2和sn-3位置具有环状磷酸酯，这种结构对于它们的活性是绝对必要的。特别是，它在易受伤的组织中发现，尽管它可能具有与溶血磷脂酸类似的信号传导功能就其本身而言，它还具有一些非常独特的生物活性。例如，已知环状磷脂酸是DNA聚合酶α的特异性抑制剂。它对抑制癌细胞的侵袭和转移具有明显的作用
RP3298	Cyanidin 3-(3';';,6';';-dimalonylglucoside)	C27H25O17	HMDB0030096	29.1986	67.6232	123.922	68.787	46.6034	50.3684	57.333	54.3614	55.0455	502.066	154.038	47.5983	31.3471	183.264	73.7467	45.5298	71.4776	61.7027	65.1163	133.103	59.8408	401.601	46.398	43.2289	50.9689	76.5006	54.8227	99.564	37.0192	52.677	62.3716	40.691
TN1701	Cyanidin 3-(6';';-p-coumarylsambubioside)	C35H35O17	HMDB0041261	23.1465	48.0865	49.5095	46.1097	27.1329	21.0477	38.1096	33.9514	43.5278	106.885	53.9145	41.6274	9.8829	84.1075	39.6287	51.0134	42.843	22.1726	25.6766	52.1819	23.0063	91.1982	23.9881	26.0606	27.1144	40.7416	30.5611	32.1973	34.9737	33.7012	31.2264	42.7971
RP3021	CYS-GLY	C5H10N2O3S	913-257-292	254.728	196.548	446.884	285.96	369.903	255.645	340.305	352.663	337.883	770.645	339.939	207.965	478.922	285.747	236.747	254.788	289.027	352.594	354.253	727.676	541.296	601.578	221.345	421.907	255.682	168.255	317.982	173.049	352.702	591.892	393.287	495.104
RP2723	Cysteineglutathione disulfide	C13H22N4O8S2	HMDB0000656	112.92	160.329	150.461	166.13	132.557	95.3544	111.127	89.4771	82.075	119.942	138.356	153.301	172.413	165.086	176.271	134.93	148.568	96.3984	75.2415	100.236	134.524	252.846	149.601	148.29	105.503	108.143	44.5638	113.314	59.7068	129.297	126.563	140.68
RP3451	Cysteinyl-Proline	C8H14N2O3S	HMDB0028783	7.93901	9.50236	11.0839	16.2482	26.375	17.3217	37.7111	14.3535	72.353	10.8614	96.6751	30.0328	110.741	68.4575	61.0387	84.439	106.68	97.915	70.2621	79.29	42.9526	30.8113	98.1414	23.46	62.8146	25.4481	11.0967	18.255	6.7863	10.47	10.8857	4.10183
RP1131	Cystophorene	C11H18	HMDB0030944	39.4272	65.7185	60.1404	64.9062	74.5479	109.664	90.1334	88.6912	58.0278	95.7074	93.6134	105.502	80.9186	110.384	89.3276	142.183	55.3559	41.0563	48.7923	60.96	67.1118	104.547	66.4151	45.2999	38.6029	67.9423	81.8204	53.2118	65.2216	54.2948	40.4817	72.4169
RP2757	Cytidine 3';-monophosphate	C9H14N3O8P	HMDB0240312	217.226	125.258	609.56	424.644	438.701	268.591	341.471	285.851	266.578	492.166	327.283	162.037	242.879	160.884	186.926	369.404	330.072	314.813	308.903	522.544	519.36	445.221	229.954	440.858	273.929	190.492	280.961	167.879	404.326	610.618	362.195	410.859
RP3135	Cytidine monophosphate N-acetylneuraminic acid	C20H31N4O16P	HMDB0001176	583.528	897.047	1024.83	1279.79	803.403	506.94	610.848	385.52	267.71	536.756	638.239	848.74	1006.18	1046.08	1421.24	1041.01	1099	533.18	540.005	481.049	789.319	2100.89	1211.29	1090.83	769.539	711.81	278.63	475.904	314.285	859.559	985.115	895.731
TN2135	D-3-Phosphoglyceric acid	C3H5H2O7P	892-196-228	67.4775	57.0614	66.828	153.928	56.7809	54.7244	96.2542	147.146	57.2058	67.537	118.322	113.36	20.2361	88.4356	73.4122	90.2132	68.5964	75.4749	111.106	96.0259	79.7428	63.0915	89.087	78.524	105.719	45.4097	103.865	79.5378	69.2316	174.598	91.4633	74.7698
TN1640	D8';-Merulinic acid C	C24H38O3	HMDB0041453	9.48706	51.7632	21.7957	45.2285	6.17909	9.15782	7.20212	6.61172	9.80774	6.70122	11.0425	12.9404	6.75689	10.4036	10.8518	10.7406	5.01634	33.8606	42.0655	4.99669	5.89361	4.11207	4.69952	3.59887	4.49138	5.51143	10.4465	3.10841	49.3177	10.6059	8.41075	1.47942
RP2769	dCDP	C9H15N3O10P2	HMDB0001245	36.5096	24.2542	82.7118	41.3959	48.3867	60.7477	111.617	87.4197	68.8137	97.3689	47.2468	46.9646	31.0327	29.9324	54.5621	47.2713	109.998	101.234	82.7158	106.763	44.1776	35.5907	45.4507	49.4007	105.142	132.172	111.6	54.2728	36.6328	49.1792	34.4764	52.846
TN535	Decanoylcarnitine	C17H33NO4	HMDB0000651	3305.32	1726.12	2537.57	2182.77	2227.73	2224.07	2013	2266.47	2132.26	1675.85	1988.39	2123.63	719.621	1924.21	1681.73	2313.08	4628.25	3955.99	5371.05	4757.55	3958.79	2969.67	4630.46	3616.6	4583.04	3092.04	4585.24	1892.49	2673.66	2406	2489.89	2275.79
TN393	Deoxycholic acid	C24H40O4	870-1221-1336	14.2108	15.4411	19.4614	28.5142	43.7612	39.1807	43.1696	44.6704	39.5099	37.3428	21.4357	39.4352	17.9854	4.99964	45.4986	4.74986	3.55802	3.34439	13.7979	14.7308	22.5386	17.6763	11.7544	6.11914	4.27419	4.72198	5.42921	2.51745	14.733	8.84515	8.16196	6.54532
RP1292	Deoxynivalenol 3-glucoside	C21H30O11	HMDB0039852	215.556	161.866	276.847	262.239	200.973	228.981	245.374	209.921	131.581	198.817	145.035	157.076	158.622	197.447	125.132	164.076	199.471	182.96	178.184	201.183	205.371	170.092	167.839	145.246	172.953	142.883	196.098	134.099	156.296	176.092	184.314	156.76
RP3219	D-Galactosamine	C6H13NO5	859-1227-1345	23.7037	27.8435	43.1368	50.2808	20.6425	23.6203	50.2487	48.9787	33.5302	22.543	29.3136	49.2721	26.6838	34.8963	16.9145	39.5201	58.6604	40.3247	28.9262	40.0811	22.127	32.7506	42.774	32.7725	22.094	14.2386	30.1674	17.6817	35.3192	31.9007	27.1242	12.7374
TN778	D-Galacturonic acid	C6H10O7	857-1130-1199	3825.68	4478.78	3795.99	4344.4	3474.35	3880.48	4220.76	4797.4	6180.89	3030.51	5437.53	4364.77	1913.22	3957.37	5210.89	5926.39	5139.91	5054.71	5273.31	4380.07	4614.53	3380.31	5332.82	4614.66	5770.2	6483.42	6793.71	5947.01	7609.73	7906.43	5508.79	5755.39
TN2389	D-Glucosamine-6-phosphate	C6H14NO8P	854-279-316	726.867	860.484	630.698	902.08	597.6	1021.5	574.315	1018.41	509.19	1240.4	679.242	1045.38	610.218	1109.14	602.892	1083.01	611.678	986.045	448.98	811.017	647.778	688.193	681.183	672.159	1143.55	605.742	1054.58	715.702	535.131	1031.71	628.776	766.216
TN680	Diguanosine diphosphate	C20H26N10O15P2	HMDB0001507	75.2538	97.0814	127.21	142.847	116.231	86.6672	140.153	117.628	133.821	143.677	137.543	147.006	6.34183	142.431	179.456	137.04	107.613	88.0197	110.816	71.7988	70.3579	100.823	86.9225	52.4745	77.9704	107.116	74.8956	75.9678	40.8291	109.163	38.3441	42.6066
RP774	Dihydromorphine-3-glucuronide	C23H29NO9	HMDB0060821	65.4304	87.1963	86.4024	82.5075	101.199	79.3331	79.701	102.251	95.9861	104.155	95.776	77.6467	104.564	98.1025	76.7422	100.054	69.9024	66.5638	61.1293	103.622	80.8394	82.9187	74.6715	77.9614	81.824	60.8365	73.9404	51.0407	91.4953	64.1469	65.4315	73.8482
TN949	Diisodityrosine	C36H38N4O12	HMDB0029798	50.5368	18.7497	25.5401	17.7308	29.2338	32.3641	13.6517	32.8661	25.111	31.0395	30.0852	37.7441	33.4437	36.2327	38.6362	30.0343	28.4591	25.5022	21.4013	24.5206	22.8114	29.8936	24.0922	32.9157	18.6768	26.8318	33.2365	31.5235	31.2612	19.3201	24.0287	18.5485
RP1425	Dl-2-Aminooctanoic acid	C8H17NO2	816-1169-1247	1465.72	1591.28	1580.13	1536.62	1077.52	1307.27	1256.96	1555	2413.89	2291.98	1808.05	2287.98	2317.36	1711.72	2737.75	1159.24	839.201	891.975	669.438	639.096	385.033	686.064	954.562	598.785	1462.21	1951.01	1326.55	2354.1	1095.8	1616.32	1124.9	1575.04
TN380	Dl-5-Hydroxylysine	C6H14N2O3	807-1290-1450	212.194	341.821	194.406	256.66	249.349	195.919	190.13	199.337	217.784	194.952	255.082	197.302	138.272	225.397	255.151	261.487	262.909	235.883	236.037	275.629	308.667	240.002	240.23	288.038	344.937	274.138	270.557	259.352	329.889	356.717	346.672	341.441
TN1921	DL-Dopa	C9H11NO4	HMDB0000609	44.6917	53.428	33.2668	40.5365	46.219	39.1	31.7454	36.4363	43.2862	36.1483	34.4056	40.5347	52.3389	38.5438	48.5747	44.7322	37.0536	50.7064	39.2704	43.94	110.968	44.2733	44.2239	44.1392	49.3919	52.6474	52.7217	64.4195	57.116	63.741	80.2248	64.471
RP1521	Dl-Glutamic acid	C5H9NO4	796-1237-1361	440.176	413.762	377.884	440.828	364.288	252.89	352.514	268.753	587.353	384.392	456.576	398.439	485.7	414.225	457.704	456.663	430.742	334.231	386.72	425.893	451.822	589.383	413.287	452.629	450.346	441.971	424.503	588.133	754.986	413.962	473.053	414.285
RP1129	DL-Homocystine	C8H16N2O4S2	HMDB0000575	129.855	95.6972	139.936	156.22	113.633	124.794	163.532	121.97	123.68	129.643	101.223	117.245	87.3381	125.243	133.482	121.985	157.912	150.667	122.843	174.506	153.996	122.436	128.581	130.517	155.469	140.814	144.539	149.085	135.31	187.119	197.994	149.884
RP719	Dl-Indole-3-lactic acid	C11H11NO3	792-1482-1728	4473.51	3846.22	5742.63	5894.85	5318.66	4577.29	5444.01	5259.25	6566.93	7332.88	7374.09	5864.23	6070.86	6401.21	7245.46	7411.32	7152.14	6269.89	6504.78	8139.64	9270.51	8772.33	8627.83	7856.36	9260.69	8979.97	8523.15	7858.12	6761.08	11325.8	10801.8	9621.1
TN41	Dodecanedioylcarnitine	C19H35NO6	HMDB0013327	26.7225	19.3162	26.6114	19.4311	26.1525	32.9024	26.0599	24.4497	27.554	23.5979	22.3568	29.8982	19.1269	30.4164	27.7565	22.3873	5.06266	19.7879	12.3847	16.9524	12.0132	14.7944	6.61787	7.58883	7.13043	11.7742	8.5231	5.96363	6.74149	9.02201	9.27021	6.64673
RP2020	D-Proline	C5H9NO2	HMDB0003411	641.803	449.12	468.331	633.619	841.194	625.696	552.004	606.113	752.879	770.276	890.616	720.783	930.044	389.047	791.708	804.452	468.053	551.542	635.741	747.577	704.98	665.873	379.105	640.747	559.293	635.761	665.5	694.572	509.877	806.959	402.172	729.151
TN1878	dTDP-4-acetamido-4,6-dideoxy-D-galactose	C18H29N3O15P2	HMDB0012222	38.7541	42.4761	37.6191	43.8079	26.4798	37.5868	39.5918	43.0025	27.5798	33.221	29.2698	37.29	6.64256	35.1599	30.6828	34.4421	32.2523	35.8238	21.9519	35.1978	30.1411	26.4015	35.3313	32.701	35.3612	28.2236	34.3572	29.1816	27.0447	43.2535	36.6514	30.4546
TN250	Eicosapentaenoyl Ethanolamide	C22H35NO2	HMDB0013649	0.596538	0.479279	1.92708	1.08548	1.88288	1.05503	0.991446	17.2522	0.485404	1.76336	1.90282	19.5879	16.9325	0.444647	18.0924	16.4499	0.568338	0.452582	1.01379	1.24564	1.48923	1.27563	1.49834	1.1731	0.752834	0.474403	0.86408	0.498317	0.766299	0.331043	0.850306	0.642741
RP3009	FAD	C27H33N9O15P2	HMDB0001248	28.1439	31.6479	38.878	35.5326	46.9044	36.4329	42.5036	38.297	44.4098	45.1526	41.8805	43.5558	40.8362	39.0252	45.919	49.4794	41.6367	38.0395	58.7229	47.646	36.1455	54.8481	43.3173	31.4418	36.7021	40.4714	42.7755	47.9458	29.1223	35.5061	35.1265	34.4619
TN1732	Galabiosylceramide (d18:1/24:0)	C54H103NO13	HMDB0004840	7.22142	11.5296	6.14086	8.55551	11.443	10.0315	7.14162	8.29218	5.33261	4.56402	4.46268	6.24426	7.10647	6.09297	7.00012	9.16383	6.94292	5.10239	11.0171	8.69998	5.35728	4.56291	7.61855	6.20047	7.62135	6.91869	7.67769	5.9283	8.65677	6.36828	6.1928	5.93682
RP2050	Galabiosylceramide (d18:1/25:0)	C55H105NO13	HMDB0004841	16.0634	13.482	9.98138	13.2933	18.9273	14.2869	12.1928	14.4164	17.7568	5.73654	7.4938	13.749	14.0326	12.1313	10.355	15.0209	19.3378	18.31	17.5468	10.3993	16.9432	7.655	15.3235	19.5175	13.4615	21.8973	17.1311	12.2878	10.0801	16.7814	24.1522	10.2699
TN703	Galactose 1-phosphate	C6H13O9P	684-272-308	143.134	124.82	139.587	125.066	126.027	104.158	139.094	108.538	125.377	125.369	151.235	116.331	71.6136	124.09	151.089	121.537	139.854	125.268	163.108	134.766	178.304	145.381	177.09	149.647	141.122	160.121	123.958	196.417	149.849	191.266	216.374	197.032
RP1984	gamma-L-Glutamyl-gamma-L-glutamyl-L-methionine	C15H25N3O8S	HMDB0038674	60.8267	34.4728	57.952	133.304	34.6846	44.6538	86.7233	36.5042	60.7535	36.1908	21.523	34.2901	18.0531	39.9654	46.6291	41.6009	74.2928	82.209	31.274	96.5111	123.078	36.5909	36.1196	44.2188	99.7645	32.1515	88.0809	33.2693	36.8259	76.0654	109.979	50.3604
RP2599	Genistein 4';-glucuronide-7-sulfate	C21H18O14S	HMDB0240520	27.087	311.807	324.908	119.834	45.1534	31.88	97.56	100.301	32.3859	2018.44	461.895	39.3759	67.4401	626.912	153.068	49.464	28.1105	27.6453	24.7592	321.084	87.3198	1013.64	36.7639	61.9896	42.0496	36.3046	32.3828	31.3416	21.6089	117.348	38.3346	105.107
TN2373	Gluconolactone	C6H10O6	HMDB0000150	38.4378	115.169	131.13	81.1323	45.8406	17.8669	61.3392	61.1501	15.2489	275.641	111.306	33.7695	13.5033	143.762	57.7612	34.8608	40.5785	23.2404	20.2515	106.418	55.0785	226.338	42.3124	50.1661	39.2184	43.211	21.41	42.1854	15.1684	67.2677	45.8191	62.3817
RP2386	Glucosinalbin	C14H19NO10S2	HMDB0038401	32.9236	24.1618	19.6587	38.0868	35.3245	37.3048	32.2707	44.2958	44.9247	13.3556	27.1047	35.3954	33.7565	14.1771	30.228	38.8554	43.5649	37.7388	35.7145	30.6366	48.6002	14.7063	43.5215	32.1545	36.5191	39.5219	33.4762	39.7418	43.6649	36.6085	34.0959	31.8527
RP400	Glucosylsphingosine	C24H47NO7	HMDB0000596	841.178	456.697	1038.07	841.399	878.4	1077.72	1207.42	953.07	1077	855.952	649.37	845.19	1052.68	772.653	826.27	988.581	1447.49	1567.6	2044.04	1899.42	1801.06	1096.39	1365.32	1228.03	1470.18	1400.44	1762.41	924.918	1254.19	1363.94	1388.28	981.023
TN1436	Glutaconylcarnitine	C12H19NO6	HMDB0013129	67.931	58.8845	78.4112	66.728	63.1797	59.0791	56.7512	65.047	37.4547	69.0551	61.8356	55.6614	18.2502	56.2183	28.4965	34.8275	48.9427	46.187	35.5391	63.4901	54.8468	52.8346	47.1061	57.5197	49.4664	49.6355	52.6483	35.3033	55.4804	54.5681	43.6607	45.489
RP2206	Glutaminyltryptophan	C16H20N4O4	HMDB0028808	161.75	162.689	136.375	169.813	124.671	114.027	39.7742	42.8891	79.6288	40.0812	100.741	195.496	304.201	131.452	161.063	223.057	165.264	134.761	52.4133	49.9795	51.3148	89.2391	235.363	147.699	188.696	135.826	53.1438	100.097	88.892	133.751	208.181	168.069
RP1979	Glutamylglutamic acid	C10H16N2O7	HMDB0028818	61.7833	52.5047	63.9427	64.223	56.8742	53.9458	65.0705	56.3758	53.358	67.9404	57.283	59.5193	51.6043	52.9982	49.1999	54.631	62.6085	72.9231	64.416	85.8871	100.989	66.9702	75.9303	68.4401	79.7937	61.9208	63.6127	40.7229	54.6159	64.5165	78.3173	74.2567
RP268	Glutarylcarnitine	C12H21NO6	HMDB0013130	119.713	99.7665	146.947	127.675	117.61	106.488	123.598	117.197	115.46	128.118	101.736	102.121	102.874	104.823	94.8411	106.686	85.4319	89.0817	80.0788	103.757	97.3369	92.5142	70.2823	70.8932	90.65	76.2276	99.9735	63.1658	73.3745	97.9165	88.0894	82.5735
RP3244	Glutathione	C10H17N3O6S	663-284-321	5768.38	4994.98	14827.8	10266.1	12598	9317.27	12830.1	12549.1	12259.3	25839.2	12006.7	5808.64	16655.2	10164.4	8980.74	9081.05	10656.9	12234.5	12757.4	24092.8	18891.9	14152.8	7937.77	13140.2	8854.93	7356.91	11310.1	7428.97	11989.4	20438.5	13170.8	17423.8
TN1464	Glycyl-L-proline	C7H12N2O3	656-262-298	117.571	95.7647	73.5114	88.0546	98.4762	92.2962	93.2045	82.3955	88.7531	57.1535	79.5958	92.6137	60.5064	64.816	66.7891	71.5455	112.418	129.236	86.4172	85.7031	64.2528	68.1488	111.854	73.3018	85.4123	126.992	83.9335	84.3763	102.787	75.6975	73.0497	62.1482
TN1264	Gossypetin 8-glucuronide 3-glucoside	C27H28O19	HMDB0039103	79.9107	63.8943	86.8421	82.1851	60.8308	49.5649	98.9405	61.2843	59.6294	37.5627	43.1122	26.9179	6.36856	29.9684	75.746	28.0381	64.663	32.6108	34.5715	27.2398	63.7793	28.2433	29.6914	25.0092	32.609	27.9744	27.0984	27.4309	51.1247	67.4232	68.5016	43.7938
TN2333	Guanosine 2';-monophosphate	C10H14N5O8P	HMDB0240586	67.9468	43.6777	45.5153	45.4781	61.5008	61.1221	57.1514	51.1049	43.4296	32.8417	40.8391	45.6995	23.5262	43.9562	50.7527	83.2459	44.4762	50.8302	43.4996	33.1872	40.9018	28.5599	37.707	44.5515	44.3553	53.242	49.1776	45.6401	69.6684	84.1312	76.4075	100.512
RP94	Heptadecanal	C17H34O	HMDB0031039	57.3885	580.387	316.23	445.583	377.472	467.297	498.831	398.361	461.543	376.986	378.562	390.783	437.836	276.527	338.65	316.979	49.9213	65.6121	93.9103	50.6704	83.1847	36.4052	34.0812	107.95	27.8104	46.2318	31.0173	28.2396	23.2953	20.4479	26.1738	33.2827
TN2326	Hexadecanedioic acid	C16H30O4	630-794-854	79.3121	53.7363	58.8634	54.7478	31.7842	51.1151	57.6238	45.1636	10.1055	12.6092	9.93953	18.1283	6.75382	10.4687	6.99427	9.01151	54.6246	45.482	73.3133	55.2957	38.3342	26.9052	51.9999	47.969	14.4798	9.94635	12.7442	7.17509	19.8303	12.2339	13.2513	43.5504
RP361	Hexahydro-6,7-dihydroxy-5-(hydroxymethyl)-3-(2-hydroxyphenyl)-2H-pyrano[2,3-d]oxazol-2-one	C13H15NO7	HMDB0037297	6.86738	12.4121	12.5231	9.78978	10.7496	11.5838	16.3272	12.1494	12.72	13.074	11.6595	11.6978	12.2136	12.3338	11.7305	15.7918	40.6083	41.4183	54.4306	48.6013	46.5963	39.531	37.4289	40.7191	29.5153	26.2684	37.6264	16.2849	21.9237	27.4482	23.201	33.9867
RP2014	Histidinyl-Lysine	C12H21N5O3	HMDB0028890	432.453	512.679	404.094	453.004	296.095	225.269	95.5367	122.586	387.654	246.575	341.43	599.118	772.775	600.929	533.902	660.529	311.887	153.918	216.668	231.543	210.978	206.364	526.585	343.998	464.534	261.607	176.67	439.629	510.24	574.445	1001.17	585.731
TN2152	Hydroxyprolyl-Glutamate	C10H16N2O6	HMDB0028862	159.936	193.376	183.882	163.832	134.767	169.965	166.067	131.687	155.753	129.834	158.334	127.482	26.5112	159.29	167.866	134.193	140.638	129.947	85.8115	126.988	141.146	135.508	111.217	99.5998	184.376	183.794	142.83	223.545	153.722	227.756	204.251	146.895
TN2252	Hydroxyprolyl-Isoleucine	C11H20N2O4	HMDB0028866	218.445	294.608	341.433	336.528	269.98	164.197	250.866	211.685	182.701	414.359	304.481	192.942	56.3016	293.759	237.513	200.285	215.818	200.065	157.012	414.462	312.072	355.666	328.457	292.949	277.87	319.206	229.951	271.949	164.642	338.84	291.157	330.573
TN1873	Hydroxypropionylcarnitine	C10H19NO5	HMDB0013125	14.5732	5.07265	11.3354	12.036	13.705	9.41303	11.5644	14.7207	11.2323	5.99667	8.86337	15.5282	2.84217	6.43825	7.16502	6.32136	15.138	15.9713	31.6147	13.3661	10.0109	9.00072	14.6137	13.2525	10.5381	19.0137	13.5029	10.0804	18.9087	19.5479	10.5833	13.5589
TN1770	Hydroxytyrosol 1-O-glucoside	C14H20O8	HMDB0041024	69.2945	189.103	122.583	169.492	83.1794	49.1809	112.666	126.113	72.2953	110.252	138.744	73.4247	62.9729	151.71	116.095	64.6655	78.564	54.1824	62.7879	189.203	157.107	214.98	89.7332	156.931	97.5318	68.917	77.6173	85.8388	90.8711	207.599	99.3638	230.986
TN37	Hydroxyvalerylcarnitine	C12H25NO5	HMDB0013132	11.4138	16.8701	16.9951	13.3459	4.32957	13.3718	7.07057	11.991	11.941	6.26085	6.85834	6.94406	7.64025	6.51395	8.64603	6.87522	35.894	28.0883	29.9365	26.1772	29.0417	33.4557	27.3673	31.2458	20.2202	34.1065	34.5993	24.6718	31.5639	37.138	33.139	40.4753
TN681	Indole-3-acetamide	C10H10N2O	606-572-615	16.4404	11.929	14.0091	22.639	16.1655	12.2774	15.9644	17.2468	12.921	14.3918	15.4556	12.7009	10.0156	13.7546	13.5421	16.9705	23.8321	18.8857	14.2613	29.4182	29.4324	19.3869	20.2175	27.5278	23.7594	23.6355	22.5674	21.5827	18.1166	26.5597	31.2914	30.4346
TN959	Indolelactic acid	C11H11NO3	602-430-469	34.4032	30.845	35.4102	53.9802	41.8539	28.4409	34.7525	26.831	54.7851	37.605	42.1686	38.8968	13.7761	51.9933	31.3245	45.5335	46.4292	46.1055	34.7578	44.9302	49.3737	55.1238	37.8274	32.6968	40.5656	52.5868	74.4257	54.0222	77.6171	76.996	62.5038	82.7507
RP2164	Isoleucyl-Tryptophan	C17H23N3O3	HMDB0028918	28.2658	37.5541	36.5591	47.8473	60.3421	45.4667	97.0532	42.1487	156.209	36.0545	218.025	69.673	255.516	142.416	127.222	186.758	356.68	314.348	238.091	265.638	163.092	102.537	293.371	119.481	201.994	90.2961	58.2662	69.5092	29.765	46.2419	60.9896	21.8353
TN1313	Kaempferol 3-(6';';-acetylgalactoside) 7-rhamnoside	C29H32O16	HMDB0040539	69.7697	151.362	110.423	81.8905	72.7198	85.6893	72.5415	68.3006	86.463	178.145	146.177	74.2151	23.9688	139.991	119.145	61.3373	68.8756	41.822	64.0559	104.927	74.2404	166.033	94.4536	55.6242	49.965	64.9244	51.9963	91.6114	58.5282	74.1517	63.3812	52.2482
TN1399	Lactose	C12H22O11	1071-551-594	26.2488	29.1996	35.2568	42.6129	32.0186	39.3772	35.6003	30.6588	32.6341	46.2918	38.569	32.8902	17.6849	44.5765	41.3993	38.4193	27.9205	35.2026	24.5226	48.7023	35.0852	52.2778	33.3223	35.3703	32.5034	41.8745	34.8781	35.9256	70.1552	109.126	76.4377	99.7945
RP824	Lactose 6-phosphate	C12H23O14P	HMDB0006789	60.2575	62.8635	74.2761	77.0285	75.4749	65.8244	75.5175	73.0322	64.0115	63.0091	91.5673	63.4519	67.1848	55.7402	74.0681	80.3802	87.5769	90.19	87.4722	69.4809	88.5748	64.9992	82.9118	102.229	97.2258	93.1007	96	93.908	77.1656	97.1432	97.5085	102.117
RP1644	L-Asparagine	C4H8N2O3	HMDB0000168	63.8464	56.7734	67.8707	85.0444	92.1813	69.906	72.1165	67.4736	72.6665	65.5776	68.5859	57.9447	63.8909	41.2444	45.7274	50.0182	71.4994	85.2021	83.4744	74.382	86.927	68.2115	52.0363	65.4127	83.9673	81.7084	78.2873	72.194	95.2972	102.353	64.757	71.9221
RP1540	L-Cysteine-glutathione gisulfide	C13H22N4O8S2	543-292-329	1972.02	1886.94	1981.17	2568.27	2263.29	1873.68	3115.21	1980.51	2363.41	1587.08	1851.33	1967.25	1683.77	1886.76	2135.83	2465.28	3958.78	2359.2	2495.41	1760.62	2300.82	2639.98	2899.33	2887.17	4126.9	3828.09	2576.24	2497.08	800.221	1427.7	1928.96	2139.58
TN2026	L-Dopa	C9H11NO4	540-286-323	525.81	529.099	447.876	598.952	428.808	686.241	437.085	723.327	392.206	872.967	514.171	734.838	418.943	756.488	437.954	771.17	424.88	763.63	361.881	575.554	551.417	463.684	566.66	515.153	992.832	535.652	776.998	577.104	437.676	819.36	572.383	600.309
RP1544	Leucyl-Cysteine	C9H18N2O3S	HMDB0028926	72.2404	54.4343	79.5695	94.2287	75.1938	68.3884	99.7748	78.2042	65.1997	78.5531	57.3671	55.1701	43.3926	64.5463	53.4912	55.9544	95.981	84.188	66.9816	81.6508	68.5239	78.9896	79.1981	75.39	87.4248	90.3114	82.3266	79.9302	77.3645	87.6409	105.682	70.432
TN1330	Leucyl-Lysine	C12H25N3O3	HMDB0028934	27.8418	9.1243	11.4	10.8634	15.0448	12.6255	13.4517	12.7378	3.95671	1.11787	6.13057	12.3469	1.52837	2.28493	3.27307	7.38487	7.41143	6.62105	13.28	8.63689	2.27647	2.22257	17.0465	7.23448	3.47991	4.34045	5.28667	1.63829	1.10252	0.0821157	1.31715	0.770365
TN963	Leukotriene B4 ethanolamide	C22H37NO4	HMDB0002304	6.50133	0.686928	3.17604	2.56073	1.70046	4.74466	5.74109	1.77252	13.9609	3.44342	16.7959	8.11282	4.95892	9.52981	14.0578	11.1244	8.33438	11.069	54.8436	13.7029	8.22971	14.7267	28.1173	30.5781	15.8759	18.5713	19.0949	7.99706	30.9424	21.3637	14.3534	11.0684
TN907	Leukotriene D4	C25H40N2O6S	HMDB0003080	52.7105	76.9453	87.5858	164.785	70.5818	50.7389	110.358	122.474	73.1153	14.4731	157.226	10.7752	4.78653	43.6585	46.2873	136.797	19.8353	14.0136	64.2384	34.0349	64.164	27.8844	13.8979	25.1753	223.849	16.9346	60.3738	37.944	110.077	42.5082	19.3103	28.7941
RP12	Leu-Leu-Leu	C18H35N3O4	HMDB0094648	232.475	182.95	196.525	178.486	160.39	153.742	199.311	172.717	136.061	127.797	147.634	153.959	144.851	136.711	130.432	135.748	40.2824	43.9577	67.0344	51.5966	31.3319	25.6204	29.7219	35.2993	39.2182	19.7644	19.4886	13.4926	19.4589	17.8527	17.5153	13.0102
TN1917	Leu-Pro	C11H20N2O3	534-445-486	23.7429	63.2902	27.8848	22.2408	19.1423	10.7538	21.489	13.5741	14.4625	23.0286	22.1733	14.6799	3.18034	19.3353	15.828	17.184	18.847	15.8404	15.5904	41.7665	36.1558	23.1104	28.4431	22.272	30.1193	23.7276	21.0932	20.3957	15.8461	34.4651	35.8392	31.056
RP523	Lewis a trisaccharide	C20H35NO15	HMDB0006582	21.9916	21.3668	42.7457	50.9113	46.6815	55.6477	58.5865	51.8891	54.2558	57.5441	39.3891	32.3597	52.906	26.5765	43.0272	44.2551	17.2841	26.1711	16.1338	15.3986	19.9894	10.4867	15.7992	14.2708	15.442	21.6738	11.1046	9.41363	23.1466	19.7699	11.2848	12.6234
TN1129	L-Glutamic acid	C5H9NO4	531-1246-1380	12.6852	13.3721	14.548	16.1324	13.668	11.9676	11.8521	13.424	16.4609	15.6031	19.2572	14.4577	7.05921	15.5731	13.5465	15.0536	12.9834	12.0351	12.3978	16.54	17.0478	14.4266	16.7369	15.8731	16.9884	20.2186	17.2228	16.1307	13.2823	19.9832	19.313	20.777
TN10	L-Hexanoylcarnitine	C13H25NO4	HMDB0000756	210.903	186.858	176.961	154.321	140.536	167.843	168.24	185.619	173.296	179.812	185.239	154.764	132.66	148.14	122.128	185.723	1175.54	1244.11	1209.05	1168.31	1206.18	1298.86	1173.88	1227.37	1122.46	1132.3	1132.31	1104.83	1088.05	1199.65	1130.64	1024.88
TN1410	Linoleamide	C18H33NO	HMDB0062656	25.7713	20.4317	27.7455	22.7659	31.1798	30.827	26.501	27.8982	18.6229	22.8729	19.2742	18.496	7.0851	15.5575	15.5032	21.3757	21.3929	15.6195	24.3966	27.3366	22.1213	15.9971	23.0796	21.401	35.3575	23.4211	27.4693	16.855	17.9515	17.1419	16.3918	12.9364
TN1259	Lipoyl-AMP	C18H26N5O8PS2	HMDB0059635	21.683	32.2693	29.5059	37.1467	31.9735	24.0381	33.214	26.8028	64.6773	38.5908	50.4031	39.0272	8.16126	44.3953	45.1566	40.0593	43.8291	24.1532	25.4871	32.4255	28.4595	37.8568	23.4797	20.8661	28.8932	39.4536	30.9765	40.5517	38.2869	34.0077	20.6314	24.2667
TN2531	Lipoyl-GMP	C18H26N5O9PS2	HMDB0013617	21.0006	22.9368	28.3124	24.0533	23.2765	23.0569	30.039	20.2801	33.7941	61.7311	33.9422	21.0791	15.3882	36.048	38.56	28.3468	30.8891	26.6863	24.8689	19.6109	22.0137	35.0311	25.0445	31.1725	22.7344	29.9429	28.5131	21.0903	29.6794	41.1028	31.5295	31.641
TN935	L-L-Homoglutathione	C11H19N3O6S	HMDB0029395	162.491	189.101	175.329	196.078	144.034	173.915	125.161	152.12	135.317	153.642	139.329	160.485	70.8556	179.579	141.943	190.899	197.451	213.765	132.11	239.161	161.816	262.089	155	181.547	178.711	154.628	267.212	204.628	152.339	256.403	123.138	227.979
RP515	L-Phenylalanine	C9H11NO2	507-1190-1276	5496.38	5089.87	6728.69	7327.01	6565.42	5722.2	6328.86	6305.04	7412.62	7840.34	7919.57	7257.86	6984.93	7438.04	7820.97	7940.61	8652.47	8165.06	8281.11	9442.29	9750.39	9603.22	9339.99	9045.51	10203.1	9759.88	9383.6	8895.78	8746.66	11338.2	11399.5	9800.74
RP1383	L-Phosphoarginine	C6H15N4O5P	HMDB0029438	58.4476	56.2379	67.936	71.5848	72.537	60.2217	65.9948	62.2361	66.6162	71.2435	64.3667	62.9676	64.7641	64.7513	61.3995	52.0526	58.3587	64.9055	58.8923	88.3389	71.1519	69.5075	65.1131	79.2229	85.9329	68.0218	74.3261	65.8624	69.2001	71.5959	82.828	84.6415
TN733	L-Pipecolic acid	C6H11NO2	505-1412-1651	970.185	928.531	1007.5	1159.92	822.75	1013.32	876.343	1133.4	952.312	1452.91	1178.32	1194.58	518.623	1335.53	988.287	1342.86	996.357	1300.42	863.934	1256.29	1234.95	1089.5	1285.08	1112.01	1843.9	1419.98	1510.91	1320.73	1069.45	1937.57	1417.68	1430.99
RP2694	L-prolyl-L-proline	C10H16N2O3	HMDB0011180	88.3972	90.0105	88.6163	80.8522	85.1219	65.3616	49.431	52.4601	59.1707	140.355	118.178	101.476	99.8186	92.19	87.6935	76.8743	99.0097	90.8887	58.2333	114.816	162.369	139.561	110.315	127.179	118.148	110.094	63.9611	100.455	31.0806	81.8984	77.7632	85.5829
RP1462	L-Saccharopine	C11H20N2O6	503-295-332	277.024	373.154	285.155	295.84	296.369	288.42	291.664	277.009	292.196	259.865	267.564	252.36	273.677	277.201	266.771	253.241	266.073	262.767	271.262	267.731	267.312	278.737	280.555	268.762	264.478	255.287	247.669	305.743	243.093	270.431	256.211	254.528
RP538	L-Serine	C3H7NO3	502-1236-1359	68.9851	74.4228	84.6904	77.6874	80.9182	70.8007	80.692	80.4823	92.1678	91.6302	103.676	85.7621	87.4878	96.921	102.27	89.969	87.9972	90.5403	92.7002	102.512	104.596	111.248	107.168	103.664	111.579	106.577	107.301	104.524	100.592	116.591	110.643	113.845
RP2810	L-Targinine	C7H16N4O2	HMDB0029416	192.503	86.9095	63.6917	88.7719	115.286	66.5299	213.487	81.7607	142.962	61.4811	117.278	134.75	80.288	87.8314	69.7928	232.976	110.977	193.977	125.861	113.11	107.421	103.985	134.768	65.7698	176.48	151.681	114.56	126.786	148.743	81.7271	76.0129	102.268
TN2281	L-threonic Acid	C4H8O5	HMDB0062620	16.4886	31.4608	26.7213	24.5035	18.4029	16.32	25.4201	23.7506	15.1049	36.9852	28.0755	20.3136	9.88426	29.3145	23.5666	19.8662	16.9233	11.5266	10.5408	29.1843	19.4556	35.9192	16.4125	22.169	19.1422	14.8252	13.3998	14.9547	15.7978	132.921	18.8533	27.1766
RP846	L-Tyrosine	C9H11NO3	498-1154-1230	4637.68	3504.51	5270.37	5809.34	5334.64	3996.99	5670.16	5189.13	6768.02	6553.59	6587.07	5290.4	5391	6042.92	6329.73	6598.64	5988	5875.63	6920.79	7714.21	8020.89	7288.88	7180.82	6448.56	8430.09	7879.43	8001.44	7033.74	6723.35	9705.51	8649.62	7437.95
RP492	Luteone 7-glucoside	C26H28O11	HMDB0039316	79.6701	75.9239	124.611	141.749	102.412	85.9126	118.381	114.181	135.95	151.809	171.171	124.77	120.077	148.768	164.312	151.879	198.448	173.318	163.644	195.616	215.16	206.162	213.375	198.473	264.784	239.229	227.227	202.402	187.339	299.716	320.027	267.051
TN830	Lysyl-Arginine	C12H26N6O3	HMDB0028945	108.614	68.1931	58.9438	68.3165	92.2338	67.5878	85.4133	71.9973	65.7302	41.2955	56.8944	63.4935	28.8011	41.0127	48.3572	42.9547	103.5	107.829	280.35	59.6527	44.4785	47.5292	65.1874	52.549	90.9904	214.678	135.099	186.58	119.858	159.895	136.916	56.6043
RP2276	Lysyl-Methionine	C11H23N3O3S	HMDB0028957	267.887	251.326	431.864	407.143	415.986	314.074	420.663	309.538	278.802	423.697	378.518	299.398	328.538	388.398	376.045	392.193	379.484	294.077	267.446	401.62	383.658	450.759	316.382	405.067	385.81	370.425	277.56	285.423	236.684	298.864	326.576	332.824
TN700	Lysyl-Tyrosine	C15H23N3O4	HMDB0028963	31.777	29.2935	26.4598	27.2647	31.3656	30.0751	30.2558	28.1208	27.7769	29.7582	28.9273	28.4363	27.4391	28.3305	25.6846	24.3667	27.5604	26.9678	28.1949	27.7184	28.9069	28.1792	27.6268	29.5758	29.3487	32.4948	29.9761	28.8852	32.1446	30.4096	30.0775	33.6424
RP823	L-β-Imidazolelactic acid	C6H8N2O3	548-418-457	82.4132	67.9566	102.811	84.6983	94.7831	79.7248	97.5257	94.2922	112.301	147.818	164.108	101.864	138.986	131.328	135.487	132.31	119.359	134.04	140.781	115.572	159.054	139.569	138.254	143.536	148.65	154.754	147.19	155.78	153.599	177.173	168.464	159.093
TN1359	Maltitol	C12H24O11	488-155-180	266.198	247.077	252.386	314.178	209.898	285.619	226.831	303.78	212.963	454.539	331.681	322.791	137.509	392.288	238.266	382.259	241.777	345.031	190.332	331.13	309.583	266.518	331.233	280.815	518.998	306.031	402.379	314.965	244.457	484.053	331.247	340.045
RP2571	Maltotriose	C18H32O16	485-585-628	30.4932	1063.58	918.22	349.528	58.5797	27.7924	213.894	211.213	29.3109	5691.22	1353.17	48.239	77.1802	1756.19	304.95	62.7734	23.5805	25.9273	20.4946	853.676	134.795	3006.83	40.5284	82.8337	37.8414	27.7828	30.0684	40.1367	32.8247	133.034	37.6056	190.575
RP2180	Melatonin glucuronide	C19H24N2O8	HMDB0060830	393.066	2673.3	5497.16	2986.71	1109.46	300.356	1894.54	1257	358.05	3398.27	5272.11	1226.27	2479.82	4385.58	3754.69	946.166	87.6269	9.87939	6.32674	3350.93	2416.41	4443.66	524.384	1998.18	104.194	20.661	38.5283	121.064	53.4127	2377.8	429.193	3418.64
RP1982	Methionyl-Valine	C10H20N2O3S	HMDB0028986	42.8202	24.7647	29.6965	32.9337	34.8089	31.1016	35.4801	26.9857	24.1258	25.8231	22.1908	25.7839	21.9337	26.9304	29.3974	29.3809	35.4655	36.8366	35.9337	40.3579	33.8725	30.1284	29.7782	34.0796	26.5464	33.9977	29.8752	33.4239	38.1926	45.265	48.8297	36.676
RP186	Methyl 3-oxo-12-oleanen-28-oate	C31H48O3	HMDB0035270	194.448	195.908	185.145	169.369	181.426	175.731	172.713	189.059	188.941	194.139	183.006	192.999	191.563	178.076	193.08	192.225	201.866	223.683	209.415	223.517	217.238	214.122	213.161	221.438	208.721	219.346	217.147	216.886	232.432	223.998	219.381	224.693
RP284	Methyl 6-O-galloyl-beta-D-glucopyranoside	C14H18O10	HMDB0039354	215.554	181.137	248.456	261.717	213.699	218.084	242.64	244.201	249.281	261.975	273.887	245.382	213.94	254.538	288.143	266.842	316.573	303.439	265.286	337.303	330.555	287.285	340.447	322.585	367.651	336.31	339.812	325.563	276.662	382.286	414.26	351.895
TN605	Methyl Arachidonate	C21H34O2	HMDB0062594	210.888	330.362	238.77	303.332	771.18	942.054	762.081	565.821	662.86	764.049	797.805	900.07	1120.19	1168.33	475.186	217.529	268.364	261.697	326.305	349.498	255.397	205.608	254.072	240.397	301.775	275.824	295.437	232.076	269.737	268.815	198.126	150.864
TN2542	Molludistin 2';';-rhamnoside	C27H30O13	HMDB0037418	20.6144	2153.31	1640.14	883.405	37.5427	24.3315	279.244	334.046	25.7618	10563.1	2646.44	50.0662	27.6797	3921.79	518.489	67.2614	32.6146	19.8768	14.2362	2015.23	217.762	8739.46	29.4893	121.85	25.5346	22.1181	22.4337	27.2241	27.5187	246.446	32.4985	345.994
RP2907	Morphine-3-glucuronide	C23H27NO9	HMDB0041936	18.17	266.911	287.727	176.374	56.0731	26.6285	131.738	105.305	26.4276	734.169	377.662	28.5305	66.4526	382.678	157.505	60.9801	24.5361	19.2871	12.7529	332.855	104.861	728.104	39.0893	96.8348	31.6436	27.1043	24.1768	27.63	18.3097	123.455	40.5724	190.724
TN2201	Myricanol 5-laminaribioside	C33H46O15	HMDB0036528	7.48275	19.6387	15.3589	22.2613	17.162	12.9621	12.4382	10.1795	33.8149	39.6131	55.0238	42.9132	7.11616	36.8048	30.1712	28.9784	11.0522	2.61384	6.4166	14.7441	13.7887	22.3641	7.6428	10.3765	25.232	27.068	19.6939	40.4421	40.646	37.2926	22.9294	22.9998
RP2487	Myricetin 3-arabinoside	C20H18O12	HMDB0041635	46.7437	366.251	287.762	100.976	79.7169	64.9025	124.71	113.334	112.641	542.756	278.643	72.9713	93.3933	321.646	201.448	114.992	74.3999	68.308	84.6076	266.869	103.734	347.94	81.2068	93.1974	72.9658	108.415	91.0223	92.0872	60.9704	125.345	89.2591	164.378
TN1755	Myricetin 7-(6';';-galloylglucoside)	C28H24O17	HMDB0035463	383.83	599.157	368.512	431.29	377.396	471.497	329.83	448.634	363.977	598.255	413.168	521.947	7.56004	557.804	389.815	428.897	544.775	515.256	629.597	519.96	454.54	657.951	383.962	470.402	1068.45	423.228	461.616	599.54	407.583	468.964	353.803	441.167
TN584	Myristoleic acid	C14H26O2	418-770-829	198.631	108.805	119.997	92.2905	98.9954	107.129	99.1519	88.4804	51.6438	60.6788	54.654	89.4803	36.5024	62.323	60.8604	66.9224	261.279	262.823	230.238	214.159	149.07	111.641	286.435	212.88	175.088	103.399	134.28	70.4614	95.1163	101.376	88.1917	108.891
TN2380	N-(2-Furoyl)glycine	C7H7NO4	416-1167-1245	13.2958	14.3792	17.8794	11.5038	18.2078	9.40673	17.444	9.08389	28.3496	10.2563	27.6821	13.8827	7.92049	10.5721	23.0992	10.9996	12.1178	16.0778	37.2033	16.2696	13.5048	6.82777	18.9453	11.8961	8.59268	22.9846	12.2776	31.9913	16.174	12.9943	13.2797	8.61
RP2744	N(6)-(1,2-dicarboxyethyl)AMP	C14H18N5O11P	HMDB0059653	34.901	49.8183	50.1642	40.4154	43.656	27.9932	21.0141	27.9532	24.0599	23.1544	24.0001	29.1188	32.022	48.1908	26.1469	22.5497	29.0557	29.9976	29.0204	34.2712	30.8498	101.74	25.9002	35.1832	43.1454	32.4112	33.2695	34.1272	30.1698	33.5977	36.7739	40.2462
RP316	N(6)-(Octanoyl)lysine	C14H28N2O3	HMDB0011684	61.6485	21.2094	77.1837	64.5856	80.1151	55.3284	64.8296	61.6957	65.6345	75.0282	58.1996	49.3963	71.3474	72.5093	62.2416	52.1867	28.0769	31.7257	46.6027	38.6493	42.5506	34.6467	35.3972	35.6634	41.0716	29.6423	32.3999	16.5657	25.9925	13.7056	20.258	21.3407
RP3112	N-(Carbethoxyacetyl)-4-chloro-L-tryptophan	C16H17ClN2O5	HMDB0030399	65.9052	175.61	194.296	177.627	131.747	83.1586	157.969	143.363	78.5106	184.14	283.967	113.843	119.147	287.819	193.233	107.119	81.3666	88.9787	72.9113	242.205	152.495	291.081	98.419	144.972	112.79	76.2746	81.062	74.3586	88.3722	165.588	120.17	183.683
TN1114	N-[(3a,5b,7a,12a)-3,7-dihydroxy-24-oxo-12-(sulfooxy)cholan-24-yl]-Glycine	C26H43NO9S	HMDB0002644	53.8675	66.5136	71.5116	55.5464	79.3708	49.2821	51.8963	44.0857	63.0335	58.7239	55.0138	54.3908	36.0842	45.3848	37.3953	39.5433	29.4787	33.3331	57.5553	21.7567	37.2368	31.8161	56.7636	44.7503	27.2136	44.0832	59.6675	36.1338	23.4636	30.3355	53.9516	59.0437
TN2411	N-[(3a,5b,7b)-7-hydroxy-24-oxo-3-(sulfooxy)cholan-24-yl]-Glycine	C26H43NO8S	HMDB0002409	3961.18	4346.47	3815.2	7287.11	3733.46	3015.31	3049.63	3282.26	3990.5	1922.28	8667.54	3334.98	3135.73	2564.96	3608.34	6210.43	3872.69	2534.33	3251.5	4064.71	4691.66	4501.89	2934.62	4369.02	14650.9	2933.57	755.024	9562.59	7864.35	2184.36	465.167	1635.27
TN70	N-[(4-Hydroxy-3-methoxyphenyl)methyl]octanamide	C16H25NO3	HMDB0036326	12.1231	7.00955	8.68509	9.0431	9.63558	9.77856	7.96736	9.73917	8.49558	7.44594	7.64754	14.2553	5.38235	7.17451	5.27228	6.41487	24.0258	28.8896	50.8825	22.6798	23.0503	23.5327	24.6406	23.555	25.1938	25.2662	25.6923	22.7511	22.1159	23.4743	22.7698	21.2195
TN2168	N-[(Ethoxycarbonyl)methyl)-p-menthane-3-carboxamide	C15H27NO3	HMDB0032255	74.4681	52.8158	85.3184	66.7672	48.3347	35.4008	58.8207	43.9085	40.5505	84.911	63.6231	71.6781	10.9577	93.3165	73.3703	57.8245	61.619	43.6606	19.8656	98.8314	92.0794	69.6987	69.6967	71.5938	67.1421	49.7714	47.6495	74.2077	43.8379	94.3054	84.7943	80.2574
RP109	N-[2-hydroxy-2-(4-methoxyphenyl)ethyl]-3-phenylpropanimidic acid	C18H21NO3	HMDB0139464	84.7757	67.6998	97.5446	87.6181	84.933	83.2278	95.6176	95.3213	103.144	106.459	99.9101	98.753	102.67	97.2285	102.672	114.903	42.774	26.1134	26.109	16.8168	19.1697	24.7588	25.6319	23.1092	22.0465	26.6886	30.6843	31.8719	33.2397	35.372	29.6382	36.976
RP767	N1,N10-Dicoumaroylspermidine	C25H31N3O4	HMDB0033469	265.186	210.769	299.863	304.839	264.198	368.988	339.005	324.877	313.75	275.78	255.124	235.594	324.727	208.483	290.088	243.262	179.793	205.129	242.777	206.222	238.656	112.044	182.562	161.495	157.524	197.762	185.95	129.552	157.767	147.054	176.892	108.56
RP2920	N1,N10-Diferuloylspermidine	C27H35N3O6	HMDB0033471	59.3634	34.8309	56.7241	82.6673	41.3216	27.0767	45.8603	51.5026	61.3264	35.9038	111.172	46.1077	101.408	41.7498	42.3884	56.9051	87.7824	36.6754	88.4999	111.302	85.769	42.2287	34.9494	94.128	81.1115	38.9064	35.6709	67.1439	50.8335	43.7967	32.7563	29.9844
RP2929	N1-Acetylspermidine	C9H21N3O	HMDB0001276	15.7515	30.4061	18.7512	36.3759	27.916	34.0388	27.2184	20.7023	47.7205	50.6859	54.1126	61.8045	47.6111	42.445	34.7151	40.3785	21.4718	6.66416	17.0738	26.3137	21.2403	33.005	11.1178	17.0987	36.6101	33.3682	31.5269	50.005	71.7414	47.3704	43.2978	33.5339
TN1386	N6,2-O-Dibutyryladenosine-3,5-cyclic monophosphate	C18H24N5O8P	402-627-673	378.138	404.13	356.844	509.084	313.445	440.586	389.133	479.312	337.111	484.005	316.228	414.266	36.258	473.38	339.232	466.413	432.921	437.993	254.681	443.297	338.642	452.219	443.046	435.137	544.783	383.974	422.713	382.202	370.327	625.577	519.493	536.029
RP2428	N6,N6,N6-Trimethyl-L-lysine	C9H20N2O2	HMDB0001325	26.978	224.512	140.946	209.059	189.625	200.932	205.271	187.569	218.494	177.122	140.995	161.023	178.509	172.213	148.556	129.087	207.396	246.145	226.753	289.911	248.613	235.627	170.147	222.563	228.074	245.287	195.611	254.624	132.052	158.436	147.26	167.179
RP2380	N6-Succinyl adenosine	C14H17N5O8	400-807-868	429.881	578.589	697.67	804.941	741.057	582.029	668.51	979.52	764.452	1133.36	1444.55	610.921	1024.61	995.732	926.724	1086.76	1825.94	520.475	764.377	727.652	1332.83	1439.68	775.851	734.836	1199.9	1237.32	776.439	1275.93	1319.21	1536.37	1417.44	1107.34
TN810	N-a-Acetyl-L-arginine	C8H16N4O3	HMDB0004620	100.785	79.6456	69.5351	79.5011	82.055	88.0026	70.8904	74.0254	78.0006	62.124	77.1131	82.9688	29.3914	108.741	76.306	78.2019	83.9983	86.8264	87.251	124.695	80.9423	81.6126	79.1535	84.5289	85.2884	95.9114	75.2098	88.6733	146.193	115.847	94.9808	105.64
TN1019	N-Acetyl-3-hydroxyprocainamide	C15H23N3O3	HMDB0060996	101.73	81.5346	81.6221	63.1542	81.8441	82.4871	88.4454	103.948	98.5913	84.2306	115.838	116.195	40.1497	103.373	86.9784	74.6351	75.2956	71.8295	80.7591	72.3354	74.3002	72.232	67.0101	69.677	70.081	86.4846	75.3465	76.1847	76.2883	76.4453	68.8763	91.4122
RP2942	N-Acetyl-6-O-L-fucosyl-D-glucosamine	C14H25NO10	HMDB0002220	26.2907	40.0064	38.9925	49.6382	38.9027	42.7791	48.0887	45.3294	41.7347	56.034	43.2074	30.5997	27.6729	38.7369	42.2938	42.6289	39.3737	40.5081	30.8804	47.0773	42.6699	58.1848	38.6656	42.7297	37.9714	56.3348	44.139	45.9989	48.0683	41.3653	40.2058	46.0232
RP2864	N-Acetyl-beta-alanine	C5H9NO3	HMDB0061880	46.2006	21.3692	21.2064	27.034	38.6755	49.1538	29.0657	31.0015	25.583	20.2809	33.2311	44.2254	18.7653	22.1986	25.4246	29.8334	47.3566	45.4168	65.7223	23.2795	21.2884	26.3704	30.116	38.0167	27.2902	22.3176	31.8523	43.0278	68.0639	25.633	23.7244	21.1049
TN2340	N-Acetyl-D-galactosamine	C8H15NO6	396-111-129	928.315	1024.29	783.885	955.014	735.174	869.761	747.96	1076.61	595.252	1344.37	675.896	1061.13	469.086	1317.67	779.149	1273	976.417	881.672	731.292	1273.32	960.634	974.732	879.409	884.077	869.227	570.755	994.437	704.998	785.719	1054.07	625.637	838.623
RP1634	N-Acetyl-Dl-glutamic acid	C7H11NO5	393-116-137	68.7886	86.7457	83.5734	98.8483	80.719	73.0217	18.6876	62.5188	97.7639	60.2139	117.993	83.2863	125.463	69.1578	107.527	80.7588	76.2423	80.9472	136.378	78.8116	57.4785	61.5883	75.426	76.2479	52.4314	57.2826	62.4	149.814	65.8924	63.3454	50.0206	44.8776
RP3339	N-Acetyldopamine	C10H13NO3	HMDB0041943	153.28	113.486	404.838	398.021	336.006	369.556	631.223	699.758	1189.38	1123.76	486.409	362.965	170.784	582.453	371.969	432.859	570.504	656.618	1215.81	1121.74	540.828	538.949	370.574	335.844	631.535	977.288	1182.76	808.29	120.542	321.34	272.862	172.501
TN2627	N-Acetylmuramate	C11H19NO8	HMDB0060493	14.1901	20.6668	12.7483	22.596	14.7746	16.6687	13.3147	12.0597	23.2995	20.3372	25.5793	29.7638	5.06325	18.9149	14.2377	20.6943	13.318	5.84383	10.9748	16.3874	14.4106	21.8827	8.54173	12.7622	21.111	19.8842	17.0119	26.8977	36.8479	28.4982	21.1604	16.163
TN2679	N-Acetylneuraminic acid	C11H19NO9	383-308-345	68.403	42.9681	47.0325	78.9661	40.8312	41.1353	39.1967	51.3813	111.267	31.7348	68.9575	54.4351	9.66221	52.2187	54.1158	104.613	71.7404	32.3036	29.5097	56.5022	35.055	103.21	31.0243	75.1542	55.7252	66.1523	39.8244	42.6128	405.344	51.7801	47.1193	25.2429
RP2188	N-acetyl-S-(N-allylthiocarbamoyl)-L-cysteine	C9H14N2O3S2	HMDB0060011	46.5879	53.1986	35.6851	46.4766	37.6188	40.9086	46.1931	42.8602	38.7099	22.1876	30.214	47.804	33.2759	28.4634	32.523	34.0743	35.6892	24.089	26.778	37.1299	36.6779	30.241	44.4579	46.6853	38.013	32.5443	32.4396	36.9694	36.0729	36.0073	40.1288	37.6055
RP1133	N-Acetylvanilalanine	C12H15NO5	HMDB0011716	33.191	20.1795	23.1201	29.1793	24.5358	20.4263	31.2815	24.0058	29.9284	35.2114	26.8917	27.6168	23.824	28.2604	30.7074	30.0246	27.8462	22.8081	46.5196	33.8728	38.2869	37.9989	40.7135	40.302	32.4852	24.8614	29.8006	33.5365	30.7564	62.0134	46.9205	45.5468
RP336	Na-Hexanoyl-Nb-inosityltryptophan	C23H32N2O8	HMDB0039501	84.8969	65.8622	80.0169	66.5545	70.7651	61.7373	94.8268	84.3663	77.855	82.1937	71.7151	77.1052	78.5272	64.8985	63.047	99.598	51.1351	60.56	46.7076	55.2724	51.3385	48.2346	57.3285	42.1707	66.1201	41.5191	50.386	34.6566	46.9873	50.9228	35.239	36.1331
TN574	N-Arachidonoyl glycine	C22H35NO3	HMDB0005096	54.6781	35.4739	54.4499	59.0766	57.8955	56.4673	56.1953	50.2424	49.8093	45.4875	60.755	51.1504	22.7524	66.2343	44.7064	46.4294	45.5175	47.6315	59.2054	65.0944	35.4975	31.7138	36.0885	22.9995	47.7996	37.2847	42.2335	32.5039	32.8373	43.0311	15.6505	35.4855
TN2316	Natsudaidain 3-(4-O-3-hydroxy-3-methylglutaroylglucoside)	C33H40O18	HMDB0040812	47.1054	894.933	606.817	864.998	70.6985	58.9938	365.988	492.484	88.6002	3381.68	1035.75	157.568	73.9966	1575.97	542.102	244.181	90.5537	22.8532	27.6382	1038.01	254.74	2630.48	65.9815	289.089	72.5429	37.549	46.7017	46.512	75.2385	471.45	81.3176	813.698
TN1617	N-Benzoylaspartic acid	C11H11NO5	HMDB0034251	74.17	85.5462	70.9259	88.0416	61.0995	107.13	61.1174	108.9	59.2794	120.919	63.3972	106.303	64.7133	110.521	64.6792	110.577	68.3856	121.562	59.2855	102.787	80.0345	77.5091	82.5546	74.0718	139.438	67.4906	123.961	95.2154	65.0248	120.213	74.9762	88.3275
RP925	Nb-Palmitoyltryptamine	C26H42N2O	HMDB0040815	1770.25	1705.42	3314.44	2265.48	3070.44	1730.7	2047.19	2921.23	2519.08	3271.63	3145.38	3337.43	2514.42	2001.7	3806.02	4255.02	899.987	1435.1	2006.88	653.103	3114.9	1350.23	894.031	1559.92	1602.46	1407.63	1055.96	1050.16	871.771	897.57	1507.19	1550.75
RP2407	N-Docosahexaenoyl GABA	C26H39NO3	HMDB0062332	1907.78	1148.73	2059.51	1695.11	1732.93	2048.53	1969.18	1790.17	1627.25	1343.21	1105.66	1414.01	1474.47	1263.99	1180.34	1461.35	1720.41	1841.22	2504.83	2657.06	2259.42	1522.41	2050.42	2021.96	1591.45	1549.38	1968.16	1012.14	1579.89	1387.4	1537.18	1292.37
RP673	N-Docosahexaenoyl phenylalanine	C31H41NO3	HMDB0062333	375.564	360.367	373.372	359.445	377.599	377.593	363.054	384.646	369.782	391.114	395.712	382.893	367.806	386.937	389.302	387.465	383.275	396.065	394.536	404.429	385.205	406.905	407.321	416.716	394.94	400.255	406.377	413.201	406.712	381.585	374.63	404.536
RP2489	Neocretanin	C20H20O13	HMDB0039311	40.3304	202.368	305.804	206.552	87.36	36.5303	161.845	138.556	74.0987	351.041	332.785	113.141	195.066	335.899	262.456	97.6551	47.825	27.9444	26.9568	325.826	173.425	358.307	63.9485	147.328	33.1566	46.8443	41.0783	48.199	42.0534	228.387	88.0557	251.485
TN915	N-Feruloylglycyl-L-phenylalanine	C21H22N2O6	HMDB0029356	127.958	85.9801	84.3835	101.116	98.7309	106.131	88.4106	91.14	99.3822	73.7157	95.3209	98.7171	22.3731	85.4152	86.5502	93.8457	112.515	111.12	106.937	87.1016	102.54	92.3637	93.9051	97.2249	117.251	118.352	97.8075	103.924	214.776	162.571	125.587	126.296
RP1554	Niacinamide	C6H6N2O	HMDB0001406	3.23145	4.45008	3.66652	4.80548	3.73116	4.39622	3.90488	2.73921	6.5378	7.52943	6.53071	9.94131	8.37155	7.8057	5.63848	7.5286	3.78793	1.21038	3.17884	4.62645	4.90128	5.82282	1.75975	3.88495	8.53715	6.9092	7.45936	8.72455	11.6743	10.9752	8.83759	8.07333
RP1245	Nicotinamide-N-oxide	C6H6N2O2	359-598-641	53.56	63.4029	66.7395	117.949	40.1254	71.7113	88.9317	92.9894	75.2332	69.806	77.3088	104.721	67.9016	82.8609	54.2926	94.3514	136.49	63.6538	46.5446	80.3963	155.102	142.189	68.3871	63.2315	94.1773	64.6593	53.297	77.5968	74.0718	123.783	141.285	91.8644
RP1399	Nicotinic acid	C6H5NO2	358-1283-1432	23.1418	15.6286	21.8739	28.384	25.217	21.7936	34.0325	27.5405	44.3277	39.293	30.4763	43.0035	33.7137	35.1742	32.916	34.7373	39.696	39.7746	32.0412	34.7912	33.2414	26.3272	33.977	28.0278	28.4924	23.6373	38.2912	33.2575	51.1517	40.706	39.9756	33.3628
TN2432	Nitecapone	C12H11NO6	HMDB0041949	88.5159	85.3225	92.7522	105.161	80.7681	76.0376	85.9158	79.592	76.3128	86.177	94.5482	85.0819	16.0906	91.8052	89.0905	58.0493	60.9412	48.0293	43.8063	95.6388	86.2206	103.966	78.8331	82.8535	78.3248	80.8335	63.399	99.0843	41.4543	127.683	86.9369	103.827
RP1501	N-lactoyl-Methionine	C8H15NO4S	HMDB0062182	225.546	283.653	195.135	180.296	129.138	102.364	115.76	88.9795	190.145	109.136	274.624	307.272	247.264	205.896	156.828	180.163	140.475	173.751	183.664	119.707	184.379	154.281	320.198	203.339	188.518	144.615	161.415	120.07	365.504	361.679	401.284	259.673
TN1555	N-lactoyl-Tyrosine	C12H15NO5	HMDB0062177	204.338	243.772	274.347	263.263	222.178	164.882	217.309	211.386	246.237	329.792	316.392	233.685	60.5401	273.455	296.795	271.876	209.698	158.22	118.156	255.295	302.566	329.912	273.562	260.188	278.564	259.811	232.438	275.14	237.8	594.406	368.167	434.984
RP600	N-Linoleoyl GABA	C22H39NO3	HMDB0062334	119.378	190.022	170.847	142.903	189.242	138.922	142.391	96.4732	115.363	92.3572	105.197	71.3084	87.5242	90.5627	78.4398	113.238	47.7165	51.3462	69.1036	133.502	85.5242	67.5828	67.6504	63.4711	70.2876	62.4308	68.3728	45.7862	47.1083	63.622	41.4825	35.5875
RP599	N-Methyl proline	C6H11NO2	HMDB0094696	486.886	659.061	559.745	546.894	616.865	471.002	513.088	485.706	584.092	601.648	663.278	546.865	611.2	617.207	636.445	631.462	623.286	626	630.061	721.117	753.338	691.208	730.764	698.658	852.862	743.975	751.922	680.323	705.306	901.114	929.756	893.842
RP960	N-methylvaline	C6H13NO2	HMDB0061716	85.5801	76.9391	96.4106	99.1861	83.6875	76.0627	78.8065	85.8019	95.0913	124.494	133.683	114.614	106.025	87.5524	96.3566	103.065	95.1591	102.187	113.737	145.628	160.533	143.995	131.389	118.261	109.638	107.795	134.769	144.186	144.516	178.136	162.529	129.012
TN1140	N-Oleoyl GABA	C22H41NO3	HMDB0062335	44.6191	74.2456	76.5405	162.199	58.5813	43.4459	103.084	105.501	65.8211	9.97938	141.528	8.2093	5.27438	33.9315	39.3154	138.465	17.6572	11.3887	61.9598	29.0619	63.7968	25.3001	15.0708	19.4217	253.718	11.8663	47.8822	31.9795	113.426	35.546	13.4998	23.94
RP1737	N-Oleoyl tyrosine	C27H43NO4	HMDB0062337	183.004	168.967	201.248	257.433	248.835	235.33	196.177	232.59	204.964	237.614	230.684	198.53	198.67	210.2	186.608	221.383	204.135	188.958	226.244	256.539	272.163	227.586	199.719	232.022	189.888	179.947	190.922	152.866	229.47	196.859	228.457	214.915
RP644	N-Oleoylethanolamine	C20H39NO2	HMDB0002088	32.5313	42.5721	33.2233	80.184	55.9623	63.9666	56.7712	58.0437	88.0934	55.5562	49.3441	42.7685	44.5012	47.3111	50.9777	47.0506	29.0498	39.4243	39.1179	51.7113	39.7972	31.89	26.1554	27.1877	35.0645	31.0796	22.1456	16.616	11.8364	20.5199	20.6371	25.845
RP2301	Norfluoxetine glucuronide	C22H24F3NO7	HMDB0061170	30.8011	123.178	139.202	129.027	53.8633	41.7097	150.508	103.741	107.405	192.294	152.918	43.7592	61.5454	116.979	66.6295	44.1474	35.2007	27.3414	20.4282	104.863	68.3811	172.404	35.7517	52.3816	73.759	34.9437	40.5049	102.923	37.2004	105.823	82.8405	94.0084
TN1336	N-Palmitoyl phenylalanine	C25H41NO3	HMDB0062339	1.32538	0.515398	11.7163	9.9039	6.68965	2.93101	5.55197	11.0638	14.7177	6.19815	12.5361	13.1416	3.32505	9.79735	10.4434	21.0894	6.13748	8.86068	15.2987	6.75463	10.619	5.52404	9.98151	4.55815	15.6494	19.6715	19.2501	4.5676	55.9948	33.0501	25.313	23.2916
RP35	N-Palmitoyltaurine	C18H37NO4S	HMDB0240594	597.256	435.153	577.422	559.845	532.424	516.611	491.211	489.052	546.181	529.086	497.495	481.675	467.498	480.416	430.541	445.253	85.3435	99.9202	106.074	114.597	102.922	96.2981	91.7223	86.2193	61.1444	74.0469	75.6577	62.95	59.2865	60.1335	53.1481	70.9677
RP3166	NPC	C28H30N4O6	HMDB0060499	353.5	371.964	228.545	545.027	326.788	91.2523	309.862	276.328	435.026	114.275	690.192	353.139	820.963	146.685	314.623	556.116	485.588	308.142	439.333	513.152	559.446	563.745	424.333	531.991	1450.77	305.912	118.521	935.617	777.327	132.712	82.9868	105.665
TN1357	N-Phenylacetylglycine	C10H11NO3	334-811-872	294.342	317.79	235.087	270.225	280.397	289.125	265.358	286.845	310.412	285.388	314.019	299.421	353.572	282.798	301.017	278.893	231.556	240.268	261.487	222.893	222.484	265.246	261.871	263.535	263.959	288.921	269.301	334.962	295.763	271.679	265.903	280.176
TN2790	N-Ribosylhistidine	C11H17N3O6	HMDB0002089	102.71	91.2471	88.7626	64.1696	109.994	171.884	47.3865	70.9307	59.7696	44.8228	44.2558	70.566	39.9908	61.8109	78.2927	82.4662	148.325	138.377	95.4696	57.2701	100.176	71.4579	57.6528	137.297	42.6325	84.7932	50.3247	80.0214	65.0312	62.9723	49.0523	58.5956
RP2713	N-Stearoyltaurine	C20H41NO4S	HMDB0240595	391.739	640.395	292.145	651.06	450.549	395.875	568.366	380.008	1079.93	424.15	1319.69	429.233	776.043	710.235	519.326	1124.34	530.575	310.797	728.308	652.615	786.296	648.797	705.748	461.318	2659.39	436.039	486.443	1327.98	1570.36	575.608	311.887	394.645
TN2530	N-trans-Feruloyl-4-O-methyldopamine	C19H21NO5	HMDB0039755	214.036	360.313	319.349	404.688	347.846	236.854	324.123	453.242	357.469	545.315	708.199	259.252	138.604	491.873	416.769	491.272	654.945	187.393	267.104	275.689	488.122	531.892	282.86	252.328	480.748	554.759	329.507	492.403	568.724	634.266	473.482	483.36
TN654	Nα-Acetyl-L-glutamine	C7H12N2O4	390-105-122	52.9291	39.9852	50.6667	57.0266	46.9027	36.3872	87.0797	47.0582	72.1296	30.0951	42.7544	35.509	29.2683	41.7833	69.6117	63.5244	77.6124	98.7238	98.7499	69.0711	62.4109	48.5128	83.2942	47.7269	94.2184	102.507	81.4851	70.1735	102.451	101.061	111.829	46.4933
RP3052	Nε,Nε,Nε-trimethyllysine	C9H20N2O2	326-758-817	44.6005	178.098	113.751	174.306	171.758	222.684	184.184	196.414	177.751	170.69	161.748	206.214	174.374	211.705	187.788	275.459	176.265	222.598	239.394	209.192	240.119	249.342	159.89	149.884	225.581	194.179	177.371	246.033	153.842	141.054	118.381	207.899
RP510	O-6-deoxy-a-L-galactopyranosyl-(1-&gt;2)-O-b-D-galactopyranosyl-(1-&gt;3)-2-(acetylamino)-2-deoxy-D-Galactose	C20H35NO15	HMDB0002060	3.00256	65.2273	15.5844	72.6101	47.6871	63.9174	79.3279	71.4215	75.9256	66.5025	44.5469	43.9413	53.9959	81.4749	35.7492	46.2033	4.35899	4.34002	5.0565	6.69814	3.75073	3.24438	2.56355	4.75133	3.32692	2.0549	2.58671	4.04722	1.33123	1.01912	2.42614	4.19079
RP1114	O-Aceyl-L-Serine	C5H9NO4	323-701-753	861.936	513.973	997.399	881.739	832.996	743.442	1210.45	1062.22	1323.38	1207.47	1157.97	965.51	1059.81	1127.74	1173.21	1275.8	1166.91	1057.97	1292.11	1034.26	1227.33	1095.78	1099.05	1097.69	1255.33	1360.73	1297.42	1162.88	1206.08	1268.86	1212.18	1325.98
RP1682	Octacosanal	C28H56O	HMDB0029690	104.967	90.2262	119.616	118.502	121.971	95.7917	102.842	130.791	14.9696	10.998	22.2078	13.5704	16.2345	11.012	16.0371	19.432	120.323	172.064	150.742	126.959	153.185	129.631	96.4777	118.886	25.352	15.6228	9.78658	25.53	21.9219	10.4243	9.8438	9.95955
RP2329	Octadecanamide	C18H37NO	HMDB0034146	40.248	136.53	84.2053	117.568	132.228	136.76	142.168	141.885	133.143	138.965	104.024	99.6995	110.663	136.243	115.443	98.7392	90.8877	122.604	124.019	155.619	122.711	132.46	91.1502	92.9254	133.169	118.009	100.326	127.859	87.8403	89.1527	94.9772	92.0214
TN308	Octadecanedioic acid	C18H34O4	HMDB0000782	18.0868	17.3419	19.9969	21.903	25.713	28.391	25.7327	20.1764	17.8948	16.7157	14.7833	15.246	178.315	12.6339	133.087	132.384	11.0208	11.167	14.6144	14.6943	21.9502	17.1399	12.8933	11.2304	9.1456	9.04101	8.53425	8.90519	11.1896	9.10055	8.58	9.32713
RP1364	Octadecenoylcarnitine	C25H47NO4	HMDB0094687	716.122	580.165	300.869	451.251	448.914	644.135	250.11	280.815	404.573	231.662	605.635	643.84	498.405	380.09	338.095	450.361	1012.3	1023.48	969.924	489.178	614.487	522.41	857.091	597.65	928.655	720.246	710.595	798.01	1323.62	438.848	423.441	352.771
TN669	Octadecylamine	C18H39N	HMDB0029586	7.32528	13.4679	13.5382	14.4641	9.41633	12.8653	11.7438	7.25635	6.71631	5.78497	5.28013	5.08754	41.1831	4.84859	26.4939	28.5235	5.70884	9.32554	9.74093	45.533	51.6405	9.05635	8.15248	6.96829	4.99385	2.97269	6.1295	2.37461	3.74257	2.63034	2.57565	1.32626
RP2836	O-Ethyl-4-[(2';,3';,4';-tri-O-acetyl-alpha-L-rhamnosyloxy)benzyl]carbamate	C22H29NO10	HMDB0031949	20.2369	270.618	399.849	203.324	63.2107	24.4284	209.237	171.816	47.0012	892.473	493.605	56.7013	104.087	544.623	258.765	86.0267	26.8594	16.4232	11.0378	417.183	147.744	825.155	45.0472	111.528	30.6879	31.2675	31.4409	41.4118	24.5044	206.224	41.8172	288.403
TN1448	Oleamide	C18H35NO	HMDB0002117	19.3714	16.8035	46.5522	25.0969	41.2651	36.8927	38.5806	22.5314	34.7773	27.0622	19.9351	30.3329	9.84694	34.0627	31.138	27.9952	24.6819	38.6277	50.0801	51.2506	41.5598	21.5896	26.2378	24.3213	41.4803	23.4314	39.6908	11.843	22.0182	14.2508	10.752	19.3808
RP1895	Oleic acid	C18H34O2	316-442-483	2340.51	379.512	2513.89	1691.99	2045.62	2040.42	2023.23	2166.55	1896.57	2524.39	1982.33	2094.09	1852.7	2411.12	2352.53	1965.46	2044.6	2724.95	2804.1	3205.68	3280.68	3092.41	3212.04	1852.61	3049.32	2859.45	3371.24	2171.48	2756.77	1689.17	2435.06	1994.42
RP1452	Oleoylcholine	C23H46NO2	HMDB0240596	192.892	215.097	152.566	242.563	160.069	262.339	175.867	240.854	267.036	94.5423	235.846	250.295	152.243	105.183	222.842	238.25	346.326	359.582	260.686	270.224	180.607	199.369	200.076	223.545	249.706	328.664	445.095	164.126	225.084	186.093	202.155	132.396
RP3300	omega-COOH-tetranor-LTE3	C15H16Cl3N3O2	HMDB0062513	149.508	153.673	75.6551	22.7592	174.946	143.628	89.6396	81.3584	147.001	37.6979	82.3408	182.588	191.108	63.5622	153.319	98.6856	72.1999	142.942	85.6482	70.9083	85.8402	24.0721	114.309	92.9044	158.332	129.511	168.684	160.308	135.635	138.353	159.261	126.835
TN614	O-phosphonato-L-homoserine(2-)	C4H10NO6P	HMDB0062692	34.9145	34.0398	33.6296	25.6694	20.0249	22.8773	41.703	23.0496	37.0821	20.4507	24.8559	25.268	15.0505	31.8786	26.367	16.7172	58.8998	31.5914	15.4736	24.8658	57.0507	37.3308	35.5443	29.6021	34.7648	47.0979	32.4774	32.3535	41.7767	28.2382	50.7825	28.4773
TN732	Orotic acid	C5H4N2O4	308-421-460	101.063	78.305	52.8242	80.1445	102.875	77.8974	62.1028	66.4957	46.4247	38.6803	36.7458	69.6272	5.85041	44.277	36.6606	54.9372	98.1026	97.6292	101.034	58.4029	83.4688	59.8485	90.9842	99.2832	68.637	111.792	66.2723	107.223	118.599	64.0211	52.2659	94.9091
RP3322	Oxidized glutathione	C20H32N6O12S2	HMDB0003337	35.6872	72.0194	138.147	110.622	59.2042	43.2905	100.436	59.8325	103.097	191.948	187.79	59.2053	83.4852	162.235	118.625	68.4025	112.714	55.6954	94.5168	142.55	92.3976	247.257	57.9639	52.7571	67.7792	76	47.1336	94.2042	68.202	76.7274	74.6702	70.1034
TN1369	Palmitoyl glucuronide	C22H42O7	HMDB0010331	190.84	22.243	20.7509	40.8448	44.8804	39.9499	34.3132	15.8033	28.4448	32.3855	26.7363	20.171	11.8646	25.2382	25.5813	24.0064	57.9643	49.8881	106.58	109.352	88.0854	23.2858	51.5344	68.3178	135.604	41.4595	62.7647	11.4282	188.3	42.0861	37.5339	61.2001
RP293	Palmitoylethanolamide	C18H37NO2	293-443-484	198.214	258.872	212.878	177.369	228.192	203.515	275.423	188.04	205.392	173.63	177.903	170.289	172.202	172.006	182.937	224.56	300.635	330.628	310.77	405.531	301.1	319.306	350.484	317.751	313.23	309.398	284.521	312.702	261.685	284.622	262.765	233.527
TN2163	Palmitoylglycine	C18H35NO3	HMDB0013034	91.73	34.3928	58.0672	64.1951	68.2383	105.294	122.415	232.081	216.868	71.6011	258.872	252.904	32.1747	96.1869	108.659	151.858	74.764	76.5572	139.219	75.789	98.6328	64.0322	62.5898	55.4936	92.002	128.743	108.863	73.1781	198.73	144.48	104.226	91.3739
RP691	PC(14:0/20:0)	C42H84NO8P	HMDB0007878	0	0.269148	0.254658	0.244549	1.36377	0	0	0	0.434012	0.682818	0	3.42674	0.523862	5.08367	3.51449	0.670869	428.101	594.08	2466.85	4026.53	4744.4	5279.13	4693.61	4427.66	3244.71	2723.81	4337.24	5371.44	6855.49	7223.16	7346.48	8068.73
TN2487	Phenylalanyl-Arginine	C15H23N5O3	HMDB0028989	27.9784	27.3482	30.6804	27.962	30.0238	19.8258	26.9978	27.0742	17.6428	34.4223	35.5075	18.5631	14.2151	29.8617	29.1481	27.6396	25.2226	17.5661	18.1448	34.0462	30.7473	32.3373	28.881	22.179	23.3622	24.6847	24.222	28.2118	22.1327	42.7462	31.9501	32.6657
TN1982	Phenylalanylphenylalanine	C18H20N2O3	HMDB0013302	1623.05	1348.71	1538.16	1229.06	1474.49	1022.91	1663.95	1148.95	1650.3	1204.83	1643.54	1126.98	569.444	1206.98	1582.43	1217.2	1467.08	1126.29	1319.94	1148.72	1721.87	1163.75	1499.86	1310.4	1393.81	1727.48	1227.33	1448.66	1449.29	1477.8	1717.39	1240.57
RP2285	Phe-Pro	C14H18N2O3	267-59-65	229.517	259.087	386.513	392.797	312.277	200.476	309.47	253.21	253.483	545.604	403.567	300.132	286.861	378.978	332.759	301.823	276.025	250.703	217.4	524.123	439.768	485.868	420.238	387.149	395.45	353.758	321.802	350.183	366.558	571.683	549.152	574.63
RP3026	Phosphatidylserine	C13H24NO10P	HMDB0014291	79.4927	65.1984	68.3946	148.978	81.2632	119.39	59.0734	132.53	224.44	176.72	368.473	183.34	160.895	247.605	362.053	405.156	187.142	135.93	110.892	101.283	242.13	186.791	155.709	65.9446	382.374	190.782	328.52	204.795	190.12	195.311	194.811	160.554
RP3034	Phosphoramide mustard	C4H11Cl2N2O2P	HMDB0060689	124.359	83.97	108.997	107.708	307.495	92.9012	70.256	71.9598	81.8578	79.8643	138.359	133.727	145.028	109.096	124.261	118.202	75.0668	89.414	80.7305	87.3306	102.731	107.602	118.68	103.019	92.2789	91.1379	89.8925	90.6924	95.2976	133.838	117.857	128.396
TN971	Phosphoribosyl-AMP	C15H23N5O14P2	HMDB0012276	50.2842	236.029	142.665	75.754	36.6015	37.9163	67.0478	40.0938	35.4493	81.0507	45.2568	32.1917	31.0998	128.829	49.1061	35.5749	32.2863	28.6805	23.1282	45.8963	38.4933	70.6278	27.6084	31.6756	30.2208	26.8326	33.9027	29.5103	30.4667	30.0416	22.2105	35.781
RP1727	PhosphoribosylformiminoAICAR-phosphate	C15H25N5O15P2	HMDB0012277	268.914	93.0135	809.952	92.8979	164.623	119.143	184.931	146.309	165.669	495.773	81.1151	37.6112	27.0172	775.426	286.602	131.052	39.7303	103.743	56.9139	55.9413	58.2889	204.227	33.1214	50.2776	66.2574	65.0579	123.955	76.6502	58.0394	71.7426	84.2049	68.9275
RP3096	Phosphoribulosylformimino-AICAR-P	C15H25N5O15P2	HMDB0012278	22.1999	28.4487	42.6565	42.852	28.676	32.4099	44.9661	34.1646	30.3449	59.0834	37.8423	28.9986	26.6537	47.6961	36.9262	37.432	26.1732	27.0855	26.0847	40.1769	36.5662	75.0141	23.0318	23.646	36.7743	42.1627	32.9155	36.9993	20.7967	27.3312	28.3671	25.7581
TN1484	Phosphorylcholine	C5H15NO4P	HMDB0001565	39.364	36.3974	35.837	32.678	34.511	30.9525	34.9997	30.3006	42.2177	36.3859	42.2859	34.0187	22.0207	34.3044	35.2503	33.2333	31.9849	31.4864	34.8881	32.2486	36.8096	34.6356	39.8549	33.3983	41.3117	45.0474	32.7768	33.1773	39.0254	37.9526	38.2937	36.7489
TN696	Physagulin F	C30H40O9	HMDB0039631	852.414	706.401	1024.34	869.506	1366	915.983	885.926	946.112	599.727	674.739	514.961	527.251	170.991	464.986	327.403	464.786	494.422	571.415	464.453	805.714	684.691	324.287	514.078	613.348	536.674	307.437	516.541	238.188	419.042	323.138	247.855	406.174
TN132	Physangulide	C28H42O9	HMDB0037381	344.693	350.201	504.228	547.939	753.531	611.022	524.6	555.491	562.539	436.209	564.667	415.781	129.455	329.805	372.439	422.412	213.543	245.279	283.457	270.147	311.931	229.242	215.61	228.936	191.123	274.841	205.196	205.345	406.204	235.31	170.597	228.754
RP1428	Pivalic acid	C5H10O2	HMDB0041992	449.303	409.805	293.987	349.026	311.154	407.508	341.442	350.865	331.784	274.336	351.859	495.454	266.285	259.55	279.146	353.109	398.385	600.333	505.59	312.242	406.802	259.003	317.777	421.782	450.805	456.194	436.505	423.524	597.183	346.554	315.195	336.92
RP2077	Pro-Leu	C11H20N2O3	243-1132-1202	813.085	1023.44	1494.75	1630.7	1257.68	805.364	1155.94	968.396	887.659	2055.99	1380.48	964.916	1027.27	1290.01	1166.51	1036.22	1173.31	1132.65	961.811	2345.78	1861.4	2053.18	1908.7	1747.34	1594.83	1583.1	1324.38	1456.35	793.584	1719.48	1786.72	1724.07
TN212	Propionyl-CoA	C24H40N7O17P3S	HMDB0001275	303.677	305.331	301.161	275.62	249.211	252.601	294.72	274.243	306.381	271.793	294.939	262.367	68.7671	294.266	285.331	273.353	220.04	224.801	244.179	226.354	193.048	207.82	191.917	162.479	195.788	229.105	210.334	207.604	172.347	223.244	166.694	146.309
RP2720	Propionyl-L-carnitine	C10H19NO4	241-777-836	244.725	82.9069	57.8228	153.942	102.368	183.259	111.941	154.08	131.611	59.4234	103.526	187.775	111.568	46.1991	38.279	54.8981	156.063	234.995	164.035	60.3038	48.6515	40.6419	89.5926	68.2541	98.15	87.2715	84.311	107.488	263.25	78.6476	59.8399	32.7784
TN229	Pteroyltriglutamic acid	C29H33N9O12	HMDB0001902	70.2079	78.6705	72.4218	68.3537	59.4896	71.4131	95.8322	84.2214	72.0595	56.7863	78.1053	82.3248	75.0204	71.0171	63.6916	66.277	36.3874	59.4656	50.424	38.3316	52.883	63.9053	49.5996	66.3682	56.725	50.8365	46.6046	60.1679	55.0684	46.6962	29.3878	33.9534
TN745	Rubrofusarin 6-[glucosyl-(1-&gt;3)-glucosyl-(1-&gt;6)-glucoside]	C33H42O20	HMDB0034569	9.42172	11.8566	17.1977	16.1736	14.5746	13.2699	13.455	13.9483	21.3506	22.699	30.0647	15.0724	2.0626	22.9178	24.8809	25.7762	23.1872	19.2113	18.0066	25.2884	28.579	27.2828	24.804	24.9637	28.0866	28.3062	26.4663	23.7443	20.9282	45.5169	35.0817	34.0403
RP2957	S-(1,2-Dichlorovinyl)glutathione	C12H17Cl2N3O6S	HMDB0060504	16.8281	12.1181	9.80397	12.0533	22.7931	18.6414	14.8312	15.0523	20.3133	16.4178	15.0185	22.3863	25.8352	15.527	16.3768	20.2199	20.3634	22.0775	26.561	13.3594	14.0858	10.1016	15.9613	9.82902	20.6468	23.8111	17.8366	17.3974	19.3547	12.5779	22.5461	13.9889
TN2016	S-(11-hydroxy-9-deoxy-delta12-PGD2)-glutathione	C30H51N3O10S	HMDB0013055	0.561955	21.6372	12.3163	18.6717	22.9191	18.0719	19.9798	36.8781	31.9356	31.4816	32.5554	40.6489	40.0209	10.7131	42.9617	30.2324	24.6095	23.4024	34.0448	23.8979	38.9927	29.1638	30.1692	29.8206	23.5833	19.8298	32.4932	34.6654	21.3259	23.1841	34.9009	32.247
RP2943	S-(5-Adenosy)-L-homocysteine	C14H20N6O5S	190-621-667	313.029	306.093	382.209	432.444	412.77	225.788	140.361	85.8885	141.352	104.184	187.646	265.298	324.299	245.158	304.815	246.649	239.621	178.663	122.447	213.71	317.534	442.587	342.155	381.398	207.207	140.611	85.369	154.149	153.108	252.654	331.931	297.889
RP1833	S-(Hydroxymethyl)glutathione	C11H19N3O7S	HMDB0004662	35.9143	39.4458	30.8836	29.8083	50.515	39.2824	36.3076	24.1251	49.0163	28.5241	25.5531	43.615	61.1758	22.0263	46.1758	37.7846	38.2059	48.7612	38.7381	28.0884	31.9097	30.2845	46.4287	41.9443	50.0787	50.0128	60.0524	52.0985	37.9427	51.7804	59.4544	49.6909
TN2290	S-3-oxodecanoyl cysteamine	C12H23NO2S	HMDB0059773	25.967	34.5085	43.4701	42.0204	33.8429	19.372	28.9958	24.9576	21.4392	49.9719	37.1008	22.7094	5.39989	37.0858	29.1687	22.5326	25.749	25.1292	19.0425	55.8822	39.4769	44.8528	38.9252	35.0787	33.9787	39.5763	28.2228	33.2271	18.6325	42.1901	35.3961	41.71
TN1733	Saccharopine	C11H20N2O6	HMDB0000279	121.431	55.1916	79.7702	87.641	63.068	48.2797	83.2044	70.5408	156.605	107.205	85.4272	79.6889	23.481	108.074	94.4916	134.663	76.9487	46.8594	65.7655	71.6332	75.0608	86.0891	53.3394	55.0275	87.984	65.4291	70.5915	77.7901	159.716	119.921	78.7098	65.468
TN744	S-Acetyldihydrolipoamide	C10H19NO2S2	HMDB0001526	104.127	110.058	104.883	100.787	101.105	93.8813	99.9981	97.3233	117.758	125.147	119.158	109.42	51.2934	113.397	113.244	119.038	112.825	104.758	97.0866	110.523	123.683	130.253	120.577	119.215	126.076	130.72	125.423	121.228	112.59	141.821	145.813	136.988
TN1764	S-Adenosylhomocysteine	C14H20N6O5S	HMDB0000939	39.6103	39.6865	31.9406	38.3129	38.6909	28.7312	49.3339	26.308	34.9986	48.4516	38.5467	31.3715	69.7668	34.5455	48.0853	48.6092	44.3506	38.6181	36.6369	46.6973	43.262	45.5489	45.5117	46.7271	53.4928	41.665	48.2991	39.3614	32.2635	46.283	40.702	38.7133
TN2271	S-Adenosylmethioninamine	C14H23N6O3S	HMDB0000988	14.3205	11.9401	12.6464	17.2717	15.9124	12.0506	25.8119	25.6189	70.8433	29.6141	40.655	23.2919	3.90022	74.4026	100.46	83.4404	21.6835	9.15982	14.4818	22.9393	28.4633	15.318	18.6289	10.4196	42.0767	34.4736	24.3507	42.8482	100.367	36.8154	22.7713	13.5139
TN990	Salicyluric beta-D-glucuronide	C15H17NO10	HMDB0240252	49.475	47.2691	45.8549	41.4958	51.6281	55.6723	45.3592	44.2988	39.3947	40.128	34.5226	56.1089	18.7593	40.8329	46.1274	42.1164	46.1715	60.4032	52.0277	63.1692	53.6936	50.3307	52.8911	62.4671	51.2801	46.2379	46.1874	51.526	54.1922	67.8807	65.149	84.026
TN1108	S-Carboxymethyl-L-cysteine	C5H9NO4S	HMDB0029415	34.7773	15.7583	10.5295	4.47556	15.0208	34.0069	11.4846	20.8795	17.316	9.97944	12.0149	31.3739	4.43987	15.2636	13.4795	24.0553	21.8021	51.4195	20.0458	15.8894	6.59536	5.13538	12.3968	21.8963	36.5108	35.502	39.5604	18.5798	41.6773	30.8809	15.4086	19.6656
RP1070	Schleicherastatin 3	C29H50O3	HMDB0035512	98.1787	73.2142	49.0762	77.83	68.6323	88.0738	60.9687	54.2072	110.999	58.9137	175.137	196.847	178.606	108.442	118.647	139.275	245.897	209.185	154.718	81.1361	94.3881	105.497	136.715	97.872	248.316	224.415	160.638	225.691	224.806	126.168	130.356	61.0644
RP2326	Schleicherastatin 5	C29H48O3	HMDB0035804	1224.29	281.553	279.75	345.44	380.372	1196.05	270.529	368.808	478.66	165.696	251.328	1566.75	419.337	398.253	257.158	412.08	858.358	1550.55	1338.72	316.485	422.842	235.842	877.263	866.08	515.161	431.958	912.409	275.239	1255.12	285.675	366.707	287.164
RP2159	S-Cysteinosuccinic acid	C7H11NO6S	HMDB0029418	65.6144	60.6925	54.5802	56.6622	53.2954	49.4728	49.598	47.8338	57.2303	80.9407	71.6958	70.3905	68.8238	103.856	67.7207	58.6394	58.7633	55.6116	54.5867	85.1793	83.5326	78.3932	64.784	68.0455	55.7772	51.8775	64.2776	88.4053	78.7993	72.8596	71.0773	62.5841
TN854	Se-Adenosylselenomethionine	C15H23N6O5Se	HMDB0011118	43.21	35.9079	51.3799	38.3016	43.7294	41.734	38.6835	47.1484	42.1917	72.1624	35.7981	31.4416	39.319	38.0768	31.4551	40.1256	27.7498	38.1112	28.268	46.3722	32.4562	32.4912	28.6722	35.4611	31.3812	25.1758	36.2058	29.3433	42.1106	41.5299	32.4739	40.419
TN390	Selenocysteine	C3H7NO2Se	HMDB0003288	125.984	127.047	116.501	119.97	124.183	116.702	124.431	121.789	112.303	112.818	12.2309	128.599	151.003	134.144	141.267	139.526	156.419	159.112	159.356	161.744	167.685	163.185	164.154	165.472	167.303	170.927	170.372	168.959	173.282	169.482	166.682	92.1817
TN1710	Sesaminol 2-O-triglucoside	C36H46O22	HMDB0041775	9.31396	23.2311	14.0453	13.6997	11.8914	17.5278	7.81118	9.60958	12.8437	30.9497	18.3837	14.9831	5.81822	26.6032	19.7544	16.2672	20.0084	18.6908	14.827	23.4279	13.1823	40.2371	8.35939	18.5196	9.9721	18.5276	22.131	8.42357	27.4949	18.4266	6.23747	22.5049
TN1157	S-Lactoyglutathione	C13H21N3O8S	172-260-295	41.9619	46.749	54.5815	47.0751	51.5923	46.9021	39.199	44.7065	31.2304	34.0817	33.0517	33.4705	12.0875	35.1156	27.2828	27.4373	39.1403	42.6142	44.4865	53.842	52.2114	50.2407	41.0304	52.0574	39.0802	42.2292	54.8547	33.3053	36.9048	43.4236	49.6888	42.524
TN1643	S-Methylmalonyl-CoA	C25H40N7O19P3S	HMDB0002310	25.9786	17.4999	32.2575	18.5702	29.4042	13.5722	27.1766	19.3613	26.8273	21.4418	40.4572	15.5501	17.6462	21.6438	37.4543	15.7189	34.9474	17.8593	38.7548	18.6245	38.5102	30.504	34.8252	38.3305	46.1426	31.6065	15.802	32.4903	30.1556	21.7876	31.8359	28.5313
TN1116	Stearidonic acid	C18H28O2	151-243-278	2436.57	1194.87	2027.45	1533.17	1672.18	2048.34	1968.61	1946.57	1289.01	1059.15	1361.59	1706.93	473.184	1230.2	976.068	1527.29	2922.93	2694.88	2985.21	2638.41	2153.69	1453.04	2638.68	2421.39	2339.71	1282.6	2462.39	774.041	1472.88	1247.87	1230.29	1087.15
RP3119	Stearoylglycine	C20H39NO3	HMDB0013308	46.1451	255.61	174.925	295.469	220.96	196.991	221.057	200.03	190.985	176.251	179.948	128.731	190.39	159.248	172.246	138.97	161.654	195.347	230.305	309.936	350.776	315.619	259.39	279.45	276.487	211.981	160.923	196.296	126.821	154.99	186.682	232.011
TN2610	Sulfoglycolithocholate(2-)	C26H43NO7S	HMDB0062801	275.241	276.366	160.325	906.565	171.129	99.5988	185.223	195.959	387.413	145.685	617.859	230.007	235.615	249.307	148.183	545.093	237.271	89.5161	237.496	321.262	289.98	218.62	148.624	537.468	807.488	149.545	132.954	363.01	835.782	223.766	118.428	107.21
RP3319	Sulfolithocholylglycine	C26H43NO7S	HMDB0002639	574.377	472.389	296.698	809.803	439.625	450.941	350.234	325.986	754.443	304.881	1174.97	712.38	2197.66	426.036	696.351	1155.18	1074.77	644.641	860.311	959.939	952.171	1217.88	682.195	1193.96	2922.14	600.709	149.111	2585.3	1426.14	421.492	114.794	316.097
TN1797	Sulforaphane-cysteine-glycine	C11H21N3O4S3	HMDB0240559	50.7443	53.2266	87.5469	55.9526	79.3958	34.8426	99.247	36.5493	99.089	47.7882	95.6406	34.9057	44.4218	50.2846	103.991	42.3302	76.6388	39.2496	109.778	74.1604	87.9459	112.351	80.0254	59.2979	41.1942	109.211	43.8707	89.1279	93.6956	62.8863	115.545	96.2693
RP2925	Sulforaphane-glutathione	C16H28N4O7S3	HMDB0240560	266.242	411.014	386.119	404.213	302.381	234.758	265.006	222.613	173.498	295.787	329.929	364.734	409.898	378.045	449.513	346.529	367.77	227.625	274.661	231.192	329.621	636.579	364.729	357.525	243.272	261.6	147.169	266.485	184.094	309.737	321.675	316.968
RP2832	Taurochenodesoxycholic acid	C26H45NO6S	167-456-497	866.821	472.901	779.68	1339.31	572.506	350.599	654.452	789.666	933.731	455.411	1823.53	646.327	1663.91	592.933	521.905	945.374	1426.14	540.373	1706.34	1961.6	1550.41	756.095	623.013	1622.6	2417.21	610.926	558.268	1514.13	1094.81	830.192	536.284	467.099
TN2758	Taurocholic acid	C26H45NO7S	111-460-501	443.841	1263.24	451.089	751.957	547.644	316.501	381.868	270.488	617.703	1083.08	1845.57	311.867	254.289	462.564	306.417	690.673	194.147	148.354	311.625	551.675	579.564	684.869	293.637	422.651	3403.63	288.79	118.433	736.293	1644.14	275.727	112.234	194.513
TN2339	Taurocholic acid 3-sulfate	C26H45NO10S2	HMDB0002581	19.7284	61.4109	13.0209	18.1962	16.7087	20.8283	28.8723	14.5106	29.5321	32.4359	26.3071	26.4632	5.45893	51.3815	26.5256	31.2813	15.773	12.7932	9.90146	32.8174	27.8225	27.9464	22.511	13.901	86.9236	20.6224	25.0722	17.953	64.2861	39.3207	21.0438	31.8254
TN777	Taurodeoxycholic acid	C26H45NO6S	HMDB0000896	133.503	106.282	135.375	121.267	140.217	113.339	27.3383	96.9093	42.9063	71.0285	62.502	78.9872	16.2027	49.1492	22.57	16.7956	61.5722	69.6481	62.8979	99.2721	86.1855	57.525	46.479	76.4644	27.0814	30.3102	29.9014	17.3654	29.8645	24.6618	22.7042	31.1015
RP3154	Taurohyocholate	C26H45NO7S	HMDB0011637	2162.22	2909.55	995.006	3049.77	2171.27	1299.33	2929.78	1581.78	3008.27	1775.22	4333.97	1911.75	3493.83	2257.05	1289.91	2071.57	2450.44	1661.95	2322.11	3733.42	3436.25	3086.16	3135.51	2459.27	10722	1452.12	1668.57	3763.15	5155.55	2004.35	1110.81	1674.44
TN1218	Tauroursodeoxycholic acid	C26H45NO6S	HMDB0000874	126.739	105.341	116.487	195.716	126.77	71.3153	72.9193	73.6321	182.321	50.5602	190.47	55.9906	58.3776	64.5518	90.1309	85.3544	83.85	26.4604	67.1854	131.041	146.14	88.9004	36.104	125.324	149.735	27.1926	14.8282	112.441	68.8692	89.7025	28.9935	30.0865
RP1818	Tetracosahexaenoic acid	C24H36O2	HMDB0002007	311.982	452.056	298.298	799.11	352.68	259.412	417.352	396.308	856.289	259.717	874.303	416.428	632.725	345.989	275.787	600.143	507.399	298.874	716.611	652.108	674.968	525.533	427.325	530.14	1427.26	237.388	293.136	703.748	715.454	341.717	205.693	185.33
TN537	Tetracosatetraenoic acid (24:4n-6)	C24H40O2	HMDB0006246	17.5337	13.7726	11.6218	11.9434	13.2755	13.5261	13.0122	10.3836	18.0081	10.3348	14.917	14.8495	5.90293	15.0716	15.7485	27.7076	21.5017	35.9771	160.966	9.30853	21.6513	7.94812	7.87771	151.492	241.018	120.877	101.226	99.0344	116.225	110.962	110.625	23.9479
RP2653	Tetradecanoylcarnitine	C21H41NO4	HMDB0005066	508.201	518.613	123.437	151.049	195.929	512.921	185.011	143.741	190.759	69.5761	93.2367	254.393	118.671	73.1547	76.8274	88.9092	304.061	322.78	558.881	113.54	113.194	75.6154	213.482	158.39	178.208	90.5527	162.325	72.5405	324.539	88.6808	96.9498	82.7355
RP1413	TetraHCA	C27H46O6	HMDB0062534	282.062	245.341	285.194	315.464	318.135	301.862	289.455	317.716	241.778	320.486	288.522	240.453	253.069	274.621	208.476	258.704	287.489	246.932	270.07	350.194	371.032	254.857	284.778	312.892	249.275	219.712	251.383	184.088	236.899	217.766	219.557	221.539
RP1089	Tetrahydroaldosterone-3-glucuronide	C27H40O11	HMDB0010357	1009.68	895.704	1360.27	1072.78	1015.33	1056.28	1095.7	1006.7	938.094	1051.02	954.772	929.359	996.585	1046.79	887.633	982.556	916.145	861.102	903.726	913.953	985.975	805.217	858.655	876.446	916.136	841.406	843.244	616.227	762.374	770.609	763.852	765.031
TN1830	Tetrahydropteroyltri-L-glutamate	C29H37N9O12	HMDB0012290	15.5783	12.2421	7.81225	14.335	7.68253	8.61038	15.3169	8.43923	14.2502	13.6595	11.3553	8.93514	2.85091	7.36229	14.5458	10.3771	12.2433	9.66137	8.02281	8.25722	15.7734	10.7724	11.417	12.1039	12.1871	16.2104	10.8249	10.692	8.5591	14.2492	13.0532	10.6428
TN1034	Thesinine 4';-O-glucoside	C23H31NO8	HMDB0039900	18.889	7.79744	16.4164	11.5279	23.7172	15.0486	24.6815	31.4743	25.5734	19.1307	25.025	14.9415	6.51936	42.1115	57.3005	52.201	15.0326	7.99873	8.38934	15.1665	14.8543	11.5856	14.9056	8.07452	22.2193	20.931	13.9783	23.6787	40.895	14.0698	14.7709	9.10902
TN74	Threoninyl-Alanine	C7H14N2O4	HMDB0029054	233.265	226.565	195.723	242.246	204.835	194.574	220.751	225.856	231.907	227.414	259.657	228.208	134.361	220.367	239.152	244.577	304.673	272.276	281.12	265.014	290.328	278.468	273.21	290.559	319.932	317.988	302.763	285.908	321.904	351.121	345.898	337.448
RP1334	Threoninyl-Arginine	C10H21N5O4	HMDB0029055	249.98	47.1156	82.8323	104.612	100.909	85.5322	95.7775	315.418	107.736	403.251	236.36	91.1586	93.2282	278.716	101.371	115.086	109.358	96.0232	108.133	435.599	495.208	99.6139	488.218	384.524	456.313	114.351	375.884	105.127	237.404	561.84	545.122	557.932
RP3091	Threoninyl-Gamma-glutamate	C9H17N3O5	HMDB0029075	185.299	276.71	151.635	268.003	213.925	191.154	250.125	191.766	368.175	207.107	408.021	219.9	310.153	306.423	240.998	380.53	227.765	158.625	265.778	270.41	299.147	269.655	287.192	205.808	517.826	205.111	221.815	410.227	424.72	251.128	154.604	190.732
TN213	Thr-Leu	C10H20N2O4	96-252-287	87.5957	77.9354	79.6257	80.8071	81.1496	81.6854	79.2129	80.2721	77.7382	76.8599	81.7168	75.1761	71.1606	68.1117	67.6788	62.7307	57.004	59.2302	36.3474	59.0155	61.9132	58.8348	40.9775	45.2729	63.0852	60.4747	62.1792	58.7776	61.6315	57.6248	57.4531	48.7894
RP3315	Tizoxanide glucuronide	C16H15N3O10S	HMDB0060643	81.0194	67.9095	87.2243	53.3448	99.5962	90.1078	86.4937	80.8737	89.2548	69.2456	70.6349	112.024	107.097	52.8723	85.7299	77.2516	66.5736	101.416	68.9351	93.2859	66.9982	53.8651	79.7734	112.642	101.172	78.8921	92.7853	65.1478	93.4409	83.034	108.067	93.4019
TN339	Torvoside G	C34H56O9	HMDB0030337	87.4359	95.2427	76.4852	82.697	79.547	76.0982	74.2745	79.2843	80.9588	71.0659	80.2816	76.4548	65.9908	73.3498	73.0982	69.7597	65.9661	66.9421	63.0353	65.8297	68.9673	73.2334	69.5041	64.9364	67.3508	73.2142	73.3939	66.6153	73.7177	71.3734	70.9137	64.4591
TN1684	trans-2-Dodecenoylcarnitine	C19H35NO4	HMDB0013326	33.6478	11.758	20.4344	19.4486	28.7499	36.77	46.4516	81.879	76.1896	39.6486	117.835	94.4929	21.1433	44.6977	50.6643	67.8028	26.56	31.6744	48.23	51.7952	59.7575	43.1874	33.9593	25.2437	42.8642	42.2732	41.4343	22.5123	292.928	158.938	108.087	110.61
TN346	trans-Vaccenic acid	C18H34O2	72-767-826	12.0248	41.6401	80.1042	156.437	260.465	222	243.694	261.024	248.926	232.426	219.251	240.994	59.0627	70.6887	25.0553	1314.02	13.9935	10.6175	11.4186	16.6817	18.4446	18.3809	13.3688	12.4618	12.3966	13.811	13.5348	14.0897	13.8044	13.6401	14.7234	13.0244
RP1361	Tridecanal	C13H26O	HMDB0030928	301.856	202.864	170.126	257.573	242.138	316.82	200.882	327.959	376.134	136.664	436.627	256.539	384.415	136.244	283.772	287.043	363.387	649.177	753.673	232.438	232.402	148.588	464.152	361.394	417.15	657.443	495.482	616.527	748.554	336.3	344.1	238.079
TN1013	Tridecanoylglycine	C15H29NO3	HMDB0013317	425.737	360.653	455.119	289.297	203.193	239.271	308.743	264.616	85.3191	108.219	85.9187	155.216	39.6741	97.3912	66.6908	114.805	737.733	763.452	549.736	677.31	533.135	322.084	736.06	670.846	260.885	117.744	255.763	79.0979	147.452	148.907	135.189	173.078
RP1836	Triethyl citrate	C12H20O7	HMDB0034263	116.346	125.302	115.369	139.323	129.05	114.903	123.558	114.017	136.766	146.205	154.234	122.203	130.296	125.74	125.245	128.193	116.892	102.112	114.496	124.135	121.098	140.042	114.713	117.686	175.294	112.627	104.77	131.172	139.112	123.159	118.731	110.697
TN2284	Trilostane	C20H27NO3	HMDB0015240	79.8156	82.3527	76.9045	81	74.4578	72.3878	65.6804	76.5869	64.3315	60.3884	63.3986	53.9016	109.313	50.292	52.6294	40.0281	24.7542	31.6617	145.808	157.83	152.711	150.452	110.383	153.744	29.8686	22.8241	24.7678	31.8006	23.8691	28.5065	35.2462	37.0117
TN473	Tryptophan-d5	C11D5H7N2O2	2007-07-07	10.648	2.82225	1.26171	1.11614	2.16417	9.52323	9.5332	4.16873	8.05065	6.14386	7.2445	10.5385	3.78372	7.64295	4.3655	9.74974	12.1958	21.8189	23.5087	18.0153	12.4261	12.2506	19.8711	16.1941	15.2533	16.8154	17.9105	4.29601	10.9636	9.63339	7.6018	7.24679
RP2494	Tryptophanol	C11H14N2O	HMDB0003447	19.0227	58.9581	31.6544	51.5032	56.1282	50.1216	67.4619	59.0759	64.8793	58.4824	48.0568	43.775	41.4625	53.7882	49.0889	42.7516	44.5004	57.1745	67.4557	72.7822	61.8713	72.7285	48.6775	65.8956	67.9339	54.1975	59.1706	56.4817	41.2734	47.2945	44.2737	54.5405
RP1529	Tryptophyl-Threonine	C15H19N3O4	HMDB0029093	262.941	183.217	407.778	289.782	269.118	257.462	530.261	557.068	1312.32	759.899	350.497	716.263	530.558	859.837	560.465	1081.13	567.957	576.376	737.431	581.642	373.465	336.857	414.204	273.243	887.647	855.683	681.682	1226.56	1207.51	694.054	630.305	175.53
RP752	Tsangane L 3-glucoside	C19H34O7	HMDB0040824	73.5958	107.174	97.6741	62.0764	102.058	64.357	65.1715	58.6566	54.7875	41.9219	62.6961	63.1924	66.4791	51.205	64.5558	53.8725	11.846	12.6287	17.6574	14.8823	2.66418	4.86709	10.805	4.24644	7.09799	3.84535	4.22696	4.45531	7.08402	10.3462	37.0389	49.5664
TN2006	UDP-L-arabinose	C14H22N2O16P2	HMDB0012303	37.1174	84.3676	125.642	141.34	56.4325	52.4585	65.5394	73.2932	40.655	109.91	109.213	55.0609	47.6686	122.082	71.6767	38.5525	19.9356	40.0909	20.4001	141.038	45.9422	168.698	38.0355	37.05	51.2774	45.3118	58.1774	48.9729	35.1549	58.4685	49.7854	63.0124
RP2794	Undecanoylcholine	C16H34NO2	HMDB0013322	110.875	60.2671	211.463	146.194	197.64	171.627	151.956	173.997	158.714	174.556	141.576	141.797	139.463	159.493	136.657	118.877	154.325	218.456	183.972	201.233	232.503	222.065	206.357	132.627	206.958	183.659	195.826	157.739	179.46	116.188	139.97	119.748
RP682	Undecaprenyl diphosphate	C55H92O7P2	HMDB0001469	3.94322	5.97302	5.49767	1.53777	2.97427	11.6611	3.09426	6.43522	4.95835	4.24778	0.14432	2.33325	1.67644	0.757881	1.45774	4.55912	18.1922	28.0801	24.0297	34.9192	18.5615	11.2895	12.7716	17.961	16.3464	12.1221	22.1347	8.41572	15.5611	19.0034	14.4951	8.95449
TN1662	Uridine diphosphate acetylgalactosamine 4-sulfate	C17H27N3O20P2S	HMDB0000934	20.9857	35.9497	26.8503	24.033	41.5283	22.4459	39.451	20.8984	39.1984	23.8624	42.3349	21.7922	30.4785	28.4509	43.2219	22.0608	44.8662	21.1591	38.5864	35.9859	42.1118	40.1591	37.8763	38.2788	24.1601	40.7329	22.4034	48.0023	75.442	32.2849	38.2606	31.2924
TN871	Ursodeoxycholic acid 3-sulfate	C24H40O7S	HMDB0002642	225.284	331.728	396.932	762.886	316.585	249.527	523.632	559.569	403.917	156.184	844.94	94.0789	73.9202	244.569	408.721	668.035	184.601	84.0348	320.347	230.41	329.233	248.565	96.2505	171.816	1072.53	81.4453	252.901	175.019	497.196	180.24	79.3866	150.309
TN2060	Val-Val-Val	C15H29N3O4	HMDB0094676	51.2285	46.1006	49.7211	42.2814	24.5576	39.2903	42.4766	29.5365	18.7724	18.0085	19.3469	22.6281	7.65259	17.6467	9.75721	20.2458	68.2247	70.9251	55.054	76.9267	48.4114	32.4294	67.2955	65.155	25.7057	8.7604	27.1415	5.75642	11.1127	7.74098	9.88022	4.8996
TN440	Valyl-Glutamine	C10H19N3O4	HMDB0029125	13.558	0.423391	1.69276	1.25297	0.637521	1.41053	1.97884	0.683294	1.38304	2.07296	3.52275	4.88994	2.60537	9.01305	5.81855	8.1615	13.3887	18.5844	29.069	20.887	17.4717	18.2094	19.1039	12.7764	20.2559	12.9957	14.1646	5.98115	9.57287	12.7388	8.21805	7.12664
TN1170	Valyl-Methionine	C10H20N2O3S	HMDB0029133	454.901	469.126	304.005	265.912	353.121	450.715	196.023	214.974	370.191	382.969	341.391	525.54	115.441	365.118	509.349	344.081	213.408	154.594	224.229	177.484	193.273	292.796	161.113	218.692	235.255	441.655	244.172	352.657	401.543	356.487	371.12	285.282
TN1681	Vanilloylglycine	C10H11NO5	HMDB0060026	488.33	634.288	433.627	739.406	407.818	618.692	388.932	699.773	353.142	826.68	410.49	650.73	347.954	811.014	369.916	821.306	478.902	662.498	301.589	868.853	472.125	691.077	504.716	574.73	863.501	450.746	988.097	648.246	460.767	916.887	466.636	748.204
RP2680	Xanthurenate-8-O-beta-D-glucoside	C16H17NO9	HMDB0013118	340.452	300.256	504.569	558.235	604.783	451.232	538.085	511.662	481.5	493.444	385.453	371.196	328.365	430.426	435.11	381.495	452.901	550.907	668.924	651.057	535.201	539.035	383.086	391.397	417.227	376.395	408.701	559.741	331.181	365.478	387.361	291.403
TN1126	Zileuton O-glucuronide	C17H20N2O8S	HMDB0060914	349.94	320.794	356.32	306.941	346.554	258.706	347.21	298.559	391.349	345.255	446.875	291.147	135.756	293.671	376.275	335.462	353.071	307.45	309.697	286.659	406.78	354.662	429.988	368.891	411.884	431.329	340.148	346.944	362.772	413.916	405.278	391.385
RP3334	α-Linolenic acid	C18H30O2	521-427-466	10521.3	5770.61	9179.31	8132.99	7386.91	8105.79	9618.41	9230.39	5401.06	6159.98	4189.11	7765.03	5362.51	4933.89	3301.17	5006.8	12993.2	11672.9	12255.1	8384.7	8518.83	5425.1	7862.63	9365.42	10048.9	4578.38	7651.09	2788.18	4016.98	3662.15	4411.95	2703.55
RP2453	β-Gentiobiose	C12H22O11	12-611-655	583.801	4855.2	4334.64	2759.69	793.273	796.522	2265.15	2125.89	592.889	8955.8	4860.18	649.023	871.264	5537.64	2149.01	623.406	291.474	628.206	405.092	4350.59	1309.87	7346.9	455.871	1024.82	535.999	591.651	754.625	592.764	573.476	1378.24	620.41	1707.56
TN334	β-Linoleic acid	C18H32O2	522-303-340	7.49511	11.7504	18.8971	19.2047	12.5847	13.3921	18.3979	29.5244	15.0968	18.396	75.4832	146.754	13043	226.032	10821.9	8982.05	37.2774	32.0617	149.135	232.537	199.52	175.387	96.9069	95.9898	36.4669	19.2119	32.2974	27.5276	20.6253	26.5791	18.0434	17.2224
TN1806	γ-Glu-Cys	C8H14N2O5S	4-258-293	109.037	111.268	95.5044	92.4686	100.447	102.87	104.314	93.0814	98.0241	102.205	90.7817	103.44	103.86	94.1577	92.3056	83.7497	91.1712	94.4397	78.1146	95.8613	84.2661	95.939	93.197	98.263	85.5787	90.517	96.5393	87.6873	92.8596	93.8197	95.1834	91.5114
RP2457	γ-Glu-Leu	C11H20N2O5	3-733-788	348.862	162.48	245.686	274.267	219.618	175.381	279.364	226.908	507.745	358.301	267.362	271.449	287.981	342.922	346.271	462.326	269.855	207.66	268.093	291.963	306.56	308.295	236.2	239.015	316.844	239.175	304.238	299.661	525.881	388.148	343.321	262.662
TN964	3-(3,4-dimethoxyphenyl)-N-[2-(3,4-dimethoxyphenyl)-2-(sulfooxy)ethyl]prop-2-enimidic acid	C21H25NO9S	HMDB0135488	33.6305	34.3018	30.5414	26.9943	41.8835	22.4851	35.0998	41.9205	50.5735	25.801	35.8116	33.0106	14.4197	35.8131	37.7303	32.9923	33.4717	24.5599	37.1452	49.5052	39.7962	26.9186	44.9272	48.4278	40.1448	52.8243	44.8356	30.3656	35.9326	49.6581	50.6235	49.2758
TN1120	3-(3,4-dimethoxyphenyl)-N-[2-(3,4-dimethoxyphenyl)ethyl]propanimidic acid	C21H27NO5	HMDB0135465	3.07548	3.50832	2.60236	3.10823	2.3844	5.39139	7.41559	5.26613	10.6103	6.22477	35.3606	164.483	164.463	99.3076	132.985	39.2134	31.2465	30.6812	30.6108	32.287	34.2773	34.1371	34.2991	34.9644	38.3947	33.2541	38.7899	36.4065	36.9865	31.4083	34.8059	33.3323
RP810	3-(3,4-dimethoxyphenyl)-N-[2-(3-hydroxy-4-methoxyphenyl)ethyl]prop-2-enimidic acid	C20H23NO5	HMDB0135472	81.2839	74.3916	113.977	94.8608	101.682	104.863	102.889	92.5199	82.4262	101.034	82.4367	90.4421	88.7442	90.9447	77.8902	102.558	91.2109	74.8193	95.3728	92.8385	78.8858	78.641	69.2536	77.2355	89.3163	74.9865	75.0588	40.8392	75.0121	91.6762	83.2593	65.5367
RP1035	3-(3,4-dimethoxyphenyl)-N-[2-(3-hydroxy-4-methoxyphenyl)ethyl]propanimidic acid	C20H25NO5	HMDB0135482	146.994	134.259	197.356	190.241	200.599	165.053	199.801	178.183	135.164	173.072	143.479	151.09	147.613	166.773	140.071	148.59	142.157	138.001	153.314	179.258	175.934	140.733	143.914	161.542	149.508	125.29	131.339	91.8068	145.324	138.684	143.934	130.719
TN941	3-(4-Hydroxy-3-methoxyphenyl)-1,2-propanediol 2-O-(galloyl-glucoside)	C23H28O13	HMDB0036376	27.8592	22.0877	26.3002	25.1506	30.8162	25.1997	32.2554	25.0283	28.7181	28.5771	36.8692	25.0493	5.86024	29.4214	29.1651	29.1565	25.9527	27.2696	23.3257	27.4827	38.3857	25.2383	30.3976	36.9067	40.3381	37.5454	34.678	33.2919	33.7653	50.2022	35.1203	32.1408
TN450	3-(Dichloromethylene)-2,5-pyrrolidinedione	C5H3Cl2NO2	HMDB0034895	29.0412	256.451	51.2336	234.457	42.0334	27.3927	252.346	22.6993	35.2423	232.866	276.963	263.602	301.574	29.3965	19.5567	266.691	300.812	302.638	307.277	311.505	304.43	314.539	265.118	310.715	308.933	323.791	304.993	323.793	321.651	315.892	305.204	199.044
RP630	3-hydroxyheptanoic acid	C7H14O3	HMDB0061653	25.2955	24.6166	32.1121	28.4099	32.471	27.704	31.8024	31.0881	33.054	38.4929	34.9238	30.5459	37.6016	32.5244	39.3897	34.5056	31.3992	35.8071	35.2249	37.494	37.9709	37.8444	40.3471	39.2144	41.8697	41.5208	40.411	40.8845	35.9613	48.7665	45.7331	45.706
TN2049	4';-Methyl-(-)-epigallocatechin 3-(4-methyl-gallate)	C24H22O11	HMDB0041668	75.477	58.7446	45.9521	75.5217	60.7565	66.224	54.0899	68.7326	56.3378	89.4917	55.0952	71.2925	42.9939	94.9564	62.7195	86.9344	60.9975	84.1523	55.8665	82.0665	59.9683	64.1466	59.6036	62.3677	98.7383	52.586	100.928	74.3234	56.721	102.85	58.4804	70.2991
RP800	4';-O-Methylkanzonol W	C21H18O5	HMDB0032602	110.85	90.4693	145.7	146.185	122.211	93.5782	102.863	98.4344	123.548	147.303	154.668	124.852	155.904	151.851	163.392	161.746	142.699	131.577	121.957	167.81	211.152	201.954	195.476	181.925	207.613	184.688	180.515	164.795	172.001	261.615	262.287	234.041
RP55	4-[(1E)-1,2-diphenylbut-1-en-1-yl]phenol	C22H20O	HMDB0142434	42.4781	35.7062	47.0044	33.141	36.1821	43.5411	50.6765	51.1345	53.191	47.7124	50.8607	48.5257	51.2498	54.725	47.4159	47.3948	10.6909	12.5472	7.98596	6.75637	6.13447	10.2565	3.0186	8.1493	7.7698	8.70344	14.8519	11.8373	10.4772	10.1439	9.47246	12.2856
TN142	4-[(1E)-1-{4-[2-(dimethylamino)ethoxy]phenyl}-2-phenylbut-1-en-1-yl]-2-methoxyphenol	C27H31NO3	HMDB0142532	23.1779	18.485	27.008	28.427	21.1502	30.6492	24.4261	29.4505	21.8196	17.8204	24.962	24.2674	10.3668	19.4758	16.7279	17.9728	1.86962	11.9504	23.4744	19.1037	14.8733	9.16275	12.8582	2.65311	1.46353	1.6496	1.85531	1.12777	1.5584	1.30769	1.31104	1.15111
TN1700	4-[2-(3,4-dihydroxyphenyl)-3,5,7-trihydroxy-3,4-dihydro-2H-1-benzopyran-8-yl]-2-(3-hydroxyphenyl)-8-[3,4,5-trihydroxy-6-(hydroxymethyl)oxan-2-yl]-3,4-dihydro-2H-1-benzopyran-3,5,7-triol	C36H36O16	HMDB0126803	45.9618	41.9875	42.5108	30.7165	29.4131	13.1619	48.0765	26.546	27.1221	20.0124	21.4578	18.7346	4.92986	20.4576	35.6613	18.1482	29.7325	15.204	21.4365	22.2548	32.3415	19.2065	26.5298	21.6002	19.4926	22.6556	24.9645	24.0406	23.6828	15.5147	33.7428	23.9083
RP1455	4a-Carboxy-4b-methyl-5a-cholesta-8,24-dien-3b-ol	C29H46O3	HMDB0001181	606.664	172.028	116.396	231.138	207.579	405.012	141.024	164.476	241.12	92.5232	207.269	574.055	242.754	243.604	152.65	243.416	622.864	684.146	728.591	248.837	300.046	235.088	591.144	391.768	519.574	345.814	546.383	263.585	1174.05	275.451	290.168	180.635
RP2600	4-Acetyl-6-tert-butyl-1,1-dimethylindane	C17H24O	HMDB0031867	22.5983	56.0922	21.7181	53.7676	41.9479	50.684	27.0486	50.3834	42.067	45.4381	35.0428	42.4051	25.4777	43.8237	42.9741	28.7482	46.5026	61.6816	45.625	66.2681	53.4345	62.2866	42.1094	52.2416	50.3143	62.7759	46.7079	55.9766	36.5548	42.0494	36.664	44.1528
RP418	4α-carboxy-4β-methyl-5α-cholesta-8-en-3β-ol	C29H48O3	HMDB0062384	4543.41	2481.14	5658.48	4540.02	4709.42	5911.23	6455.08	5315.6	5942.92	4584.76	3519.85	4548.7	5634.08	4230.37	4437.85	5433.84	7992.7	8305.29	10998.6	10505.5	9475.06	5870.6	7532.78	6819.96	7801.4	7356.72	9782.18	5049.26	6842.18	7423.07	7539.78	5340.02
RP3357	4α-carboxy-5α-cholesta-8-en-3β-ol	C28H46O3	HMDB0062386	401.117	192.972	348.3	324.346	373.991	360.167	396.302	319.121	184.086	153.614	125.93	195.219	211.281	128.974	132.445	178.167	399.513	362.384	506.477	514.205	435.399	243.806	424.293	372.564	187.689	177.141	246.94	138.221	176.275	159.202	156.108	149.835
RP1514	4α-formyl-5α-cholesta-8,24-dien-3β-ol	C28H44O2	HMDB0062389	205.274	196.495	224.35	202.179	335.55	204.401	218.654	224.243	27.0732	23.2378	40.8145	26.6968	32.5181	21.9014	17.3755	23.1228	211.543	313.029	275.83	253.146	252.396	231.205	158.884	199.448	49.0818	34.4163	22.7186	36.0747	63.8657	30.9195	22.5301	27.0691
RP1631	4α-hydroxymethyl-4β-methyl-5α-cholesta-8,24-dien-3β-ol	C29H48O2	HMDB0062390	337.372	293.736	394.771	372.112	418.7	303.986	317.925	399.782	33.6867	19.6142	29.8978	38.7688	36.4834	24.6932	31.0112	27.2735	382.421	533.023	472.953	416.435	474.143	375.727	304.184	381.02	35.3751	41.6597	31.8235	27.0303	24.8896	28.725	22.6117	21.136
RP1302	4α-hydroxymethyl-4β-methyl-5α-cholesta-8-en-3β-ol	C29H50O2	HMDB0062391	25.7022	21.6744	42.4022	42.0744	30.0477	39.4666	52.2847	41.9943	6.57863	7.81767	10.154	6.2384	5.07713	4.9034	6.00349	10.7825	42.6779	40.3671	33.3718	41.9408	44.6796	28.6928	40.6451	35.4134	7.29014	5.47037	5.69454	4.21819	3.67416	4.68046	4.78083	3.94261
TN1807	5-(2,3-Dihydroxy-3-methylbutyl)-4-(3,4-epoxy-4-methylpentanoyl)-3,4-dihydroxy-2-isopentanoyl-2-cyclopenten-1-one	C21H32O8	HMDB0030082	43.7973	52.3636	30.9404	58.5427	49.6688	48.6119	30.1447	27.9964	50.5584	61.4287	72.0133	99.1437	13.0108	64.2856	44.4984	56.4	34.0257	15.4335	27.1049	42.9188	48.6744	54.8478	20.509	28.7475	64.6177	69.4867	60.3942	63.4336	185.997	119.837	93.2461	114.38
TN2641	5-(3,4-dihydroxyphenyl)-4-(sulfooxy)pentanoic acid	C11H14O8S	HMDB0127747	1099.01	705.631	1619.68	653.519	1196.63	572.764	1232.3	649.473	830.395	1241.76	955.145	502.972	529.578	730.22	855.483	525.638	600.797	702.747	538.086	1319.4	1392.91	986.286	959.723	813.769	568.82	596.238	566.01	1078.25	724.401	945.949	1589.94	1025.49
TN2403	5-(4-{5-[(E)-2-[3-(3,5-dihydroxyphenyl)-6-hydroxy-2-phenyl-2,3-dihydro-1-benzofuran-4-yl]-1,2-dihydroxyethenyl]-2-phenyl-2,3-dihydro-1-benzofuran-3-yl}-6-hydroxy-2-phenyl-2,3-dihydro-1-benzofuran-3-yl)benzene-1,3-diol	C56H42O11	HMDB0134544	2.90516	58.7947	37.8654	24.3393	9.24612	8.7518	7.97856	12.4617	13.885	235.533	47.545	7.30492	4.43967	75.4088	26.372	11.5884	6.02464	3.53862	3.48102	45.0513	10.3341	199.892	1.85554	8.18147	4.94361	4.46865	8.97132	5.46811	5.72436	12.0856	4.1291	24.7821
TN1300	5-(4-Acetoxy-1-butynyl)-2,2';-bithiophene	C14H12O2S2	HMDB0034454	409.282	407.805	424.385	438.713	470.228	418.503	440.37	427.205	319.401	332.563	303.73	313.151	164.745	375.685	335.668	347.823	505.673	363.699	472.061	433.769	550.608	442.169	410.5	440.407	405.61	401.254	425.631	341.456	405.196	528.096	400.517	520.026
TN2524	5-(4-hydroxy-3-methoxyphenyl)-4-(sulfooxy)pentanoic acid	C12H16O8S	HMDB0127779	493.852	181.799	219.807	246.764	424.894	304.616	388.689	297.395	424.632	88.9937	233.867	394.3	52.2174	151.754	323.953	426.232	267.123	239.427	259.341	194.446	402.018	122.849	488.644	288.05	381.782	368.751	229.744	466.542	208.257	316.692	415.234	207.303
RP736	5(S),15(R)-DiHETE(1-)	C20H32O4	HMDB0062684	670.127	81.8126	1038.22	1190.44	1125.08	107.762	932.861	921.54	1099	924.058	811.928	784.916	983.458	859.024	846.51	715.957	500.215	575.326	668.322	762.963	574.092	568.476	391.962	564.933	479.759	508.151	373.856	353.477	271.443	253.374	272.386	321.843
RP3054	5,7-dihydroxy-2-(1-hydroxy-3,5-dimethoxy-4-oxocyclohexyl)-4H-chromen-4-one	C17H18O8	HMDB0128219	132.02	75.4851	130.663	114.48	147.569	169.539	286.927	240.583	182.248	240.499	122.824	232.682	128.921	194.045	141.638	132.034	291.047	221.472	262.746	247.69	135.764	105.906	150.621	134.829	258.596	167.225	219.706	193.751	158.67	256.837	166.598	170.912
RP1349	5,7-dihydroxy-2-(4-hydroxy-3-methoxyphenyl)-3,4-dihydro-2H-1-benzopyran-3-yl 3,4,5-trihydroxybenzoate	C23H20O10	HMDB0128194	585.439	554.108	675.695	699.789	645.522	661.366	723.973	665.349	780.712	710.219	704.808	693.766	647.493	687.127	759.928	761.971	633.13	644.544	796.385	687.033	637.298	687.158	640.215	585.434	611.086	647.011	661.838	658.583	512.562	608.463	602.142	485.616
RP1958	5,7-dihydroxy-2-(4-hydroxyphenyl)-8-(3,4,5-trihydroxyoxan-2-yl)-4H-chromen-4-one	C20H18O9	HMDB0127225	174.886	185.545	129.987	149.963	153.282	177.734	128.776	136.639	60.1617	54.7195	59.6314	177.466	123.474	115.049	148.188	139.992	142.278	123.791	170.762	65.2198	126.381	141.407	103.102	154.223	69.2359	136.192	57.2518	149.711	121.769	56.655	100.939	98.5609
RP755	5,7-dihydroxy-3-[3-hydroxy-4-methoxy-5-(3-methylbut-2-en-1-yl)phenyl]-8-(3-methylbut-2-en-1-yl)-4H-chromen-4-one	C26H28O6	HMDB0134743	89.882	63.8389	99.8784	98.881	78.6992	73.2601	56.8754	65.6337	53.2862	107.666	97.23	114.292	103.456	92.6228	112.51	103.31	116.182	82.2129	94.3444	111.201	153.521	156.644	161.616	143.153	135.877	105.851	142.014	170.757	145.99	190.343	189.418	177.617
TN2098	5,8-dihydroxy-2-(1-hydroxy-3-methoxy-4-oxocyclohexa-2,5-dien-1-yl)-3,7-dimethoxy-4H-chromen-4-one	C18H16O9	HMDB0129273	346.206	12948.4	11422	7156.11	1236.46	367.506	4530.27	4756.82	574.151	29754.1	12819.7	1364.57	1251.42	16754.1	4741.24	1393.21	319.654	77.3266	64.1204	12095.3	2826.55	24079.9	659.635	2162.19	276.153	149.232	159.617	425.018	174.872	3605.76	555.959	4430.65
TN1901	5';-Hydroxypiroxicam	C15H13N3O5S	HMDB0014096	59.7473	44.0716	151.631	51.2239	43.8556	60.6835	73.9544	60.2424	30.3394	64.9411	60.84	74.322	23.0771	74.8042	50.0959	130.952	50.6248	46.7523	59.0162	46.3808	149.233	50.759	114.415	54.6098	119.467	42.3968	47.804	86.8141	58.4901	73.1091	172.576	56.8628
RP528	5-[(6-hydroxy-3,7-dimethylocta-2,7-dien-1-yl)oxy]-7-methoxy-2H-chromen-2-one	C20H24O5	HMDB0136701	148.128	137.9	122.36	128.913	133.006	129.278	127.836	123.104	119.632	115.487	122.428	133.74	118.612	127.415	118.839	120.064	133.748	124.956	97.6449	90.9012	102.157	96.0819	94.7028	104.182	89.0082	89.3796	93.3046	91.7362	85.6272	94.0582	88.3287	89.8391
RP385	5-Amino-2,3-dihydro-6-(3-hydroxy-4-methoxy-1-oxobutyl)-2,2-dimethyl-4H-1-benzopyran-4-one	C16H21NO5	HMDB0038582	227.263	190.671	265.089	237.803	270.671	242.912	300.001	283.857	310.155	277.796	313.435	288.254	298.347	296.954	285.047	329.464	146.639	114.846	107.425	76.2209	76.1701	123.187	100.922	88.2225	94.2866	92.5882	84.7352	98.6819	94.1721	90.3253	77.1835	91.3024
RP2843	5-Butyl-2-furanoctanoic acid	C16H26O3	HMDB0112097	16.2334	326.79	262.487	358.332	258.073	193.688	262.334	337.665	266.966	77.8801	80.7065	69.414	154.373	91.2966	62.453	45.2071	151.958	335.638	364.675	279.995	282.568	272.8	133.973	299.14	318.478	125.744	54.7536	155.963	40.1981	69.653	63.5822	93.1745
TN2747	5-Chloro-4-(2-imidazolin-4-on-2-ylamino)-2,1,3-benzothiazdiazole	C9H6ClN5OS	HMDB0060964	117.085	77.0214	99.7238	48.1078	90.7029	36.7797	82.2843	30.7231	67.6269	28.6546	64.6639	38.5713	60.8754	40.6374	65.6649	25.6521	49.0233	38.9592	43.7123	57.3951	93.7094	59.7255	66.6712	49.6159	43.4654	55.1118	37.1566	85.3942	52.8398	56.2605	108.38	69.1459
RP2593	5-hydroxy-2-(4-hydroxy-3,5-dimethoxyphenyl)-4H-chromen-4-one	C17H14O6	HMDB0140472	191.867	177.547	268.124	185.251	126.311	123.368	181.073	94.7151	102.511	196.289	240.122	227.151	227.291	169.774	155.394	120.673	69.3325	71.8862	67.3486	410.957	259.267	148.51	134.97	133.649	76.544	68.3036	86.1286	66.4925	254.714	352.549	320.55	353.213
RP1842	5-Pentyl-1,4-dioxan-2-one	C9H16O3	HMDB0059936	14.1493	39.3991	29.4447	30.71	38.1852	42.0035	31.8814	34.3267	40.8648	4.48894	27.4343	33.1748	34.6434	33.6465	27.3743	30.1257	41.3237	47.8941	39.6246	51.2938	51.3679	43.391	36.5741	48.0767	47.5842	41.0294	34.6478	43.6269	27.9973	34.8031	31.6858	31.9647
TN1687	5-Pentyltetrahydro-2-oxo-3-furancarboxylic acid	C10H16O4	HMDB0030989	35.3183	63.3849	36.8026	78.0384	69.357	52.1184	48.1121	26.3417	136.974	99.0233	131.863	121.461	25.8175	91.3524	82.4933	78.0501	56.9595	14.9133	20.6738	69.98	64.9689	82.7771	25.247	42.9312	141.616	98.3026	63.8937	114.331	216.472	209.38	142.132	124.182
TN2103	6-(carboxymethoxy)-3,4,5-trihydroxyoxane-2-carboxylic acid	C8H12O9	HMDB0124938	124.903	128.132	168.178	116.466	114.914	116.561	112.4	119.344	122.746	119.234	227.842	112.795	240.831	98.5354	118.23	105.893	102.867	130.8	112.843	119.448	113.054	121.124	127.309	117.087	116.825	274.154	142.79	270.777	122.081	290.842	266.926	127.435
RP1539	6,10,14-Trimethyl-5,9,13-pentadecatrien-2-one	C18H30O	HMDB0034495	56.9081	45.4633	54.7036	41.7958	46.744	49.2139	66.3456	52.9932	45.1031	42.0568	34.3904	42.2258	34.6638	41.805	35.9562	51.2377	62.7496	59.0404	58.4729	82.117	71.1488	55.1759	68.6702	53.4453	60.9413	46.416	66.0492	39.4869	48.6393	67.4525	74.2127	58.5672
RP1106	6,7-dihydroxy-3-(2,4,5-trihydroxyphenyl)-3,4-dihydro-2H-1-benzopyran-4-one	C15H12O7	HMDB0125017	233.599	195.507	135.93	167.509	288.564	303.234	189.461	182.451	217.341	144.123	204.432	215.173	205.899	115.329	140.07	132.057	313.415	309.123	271.255	185.241	240.223	213.299	184.38	216.895	343.468	306.536	291.732	229.955	319.026	249.563	281.706	258.633
TN899	6-Formylumbelliferone	C10H6O4	HMDB0039147	99.3114	100.34	89.0953	82.6943	88.42	91.3724	86.4114	86.3989	85.1169	91.1484	74.5318	90.5125	93.7611	88.2508	84.7154	72.9912	82.9645	98.2693	85.8019	89.0279	83.3316	93.0694	95.9791	99.7067	77.2208	98.4953	98.6665	81.0832	84.469	93.1145	103.801	103.001
TN1465	6-Hydroxykaempferol 3,6-diglucoside 7-glucuronide	C33H38O23	HMDB0037094	6.0948	5.7823	12.4195	6.8543	8.61922	7.01548	8.77869	8.36971	12.5544	10.8705	10.2743	8.00851	1.93301	6.41658	8.28189	9.76704	12.458	10.3898	7.41436	8.20524	10.6756	8.13677	10.2142	7.05263	9.28932	12.9754	9.71944	9.79505	8.91675	9.77689	8.63517	10.433
TN1241	6-Sulfatoxymelatonin	C13H16N2O6S	HMDB0041815	186.611	153.058	160.574	132.392	144.887	121.794	182.961	122.575	144.21	104.472	120.778	110.266	49.1477	106.434	145.974	92.888	117.385	98.3675	100.998	106.023	143.098	81.7027	95.178	88.0486	102.129	130.243	95.8651	131.763	113.515	111.32	142.1	83.4375
RP2594	7-[(6-carboxy-3,4,5-trihydroxyoxan-2-yl)oxy]-6-methoxy-2H-1,3-benzodioxole-5-carboxylic acid	C15H16O12	HMDB0128738	38.8237	71.1342	84.3719	76.9246	25.435	49.6418	91.208	74.5413	69.954	103.828	68.3701	54.9001	29.875	63.8644	66.1334	69.0928	34.8217	34.0202	44.6936	82.3659	67.8641	87.9165	56.4827	58.1658	36.8093	58.1714	41.1903	73.9095	38.3276	69.5595	54.5905	48.4138
RP1726	7alpha-hydroxy-3-oxochol-4-en-24-oic Acid	C24H36O4	HMDB0062744	224.408	323.691	425.15	989.961	372.665	286.142	649.515	694.785	395.233	90.8488	831.477	84.2012	136.299	244.121	285.016	931.465	146.585	90.4355	540.128	235.094	481.815	217.045	113.063	181.96	1808.32	110.516	343.512	238.911	689.494	246.222	132.249	212.677
RP1373	7-chloro-2-(3-hydroxy-4-methoxyphenyl)-3,5,6,8-tetramethoxy-4H-chromen-4-one	C20H19ClO8	HMDB0135839	142.893	131.454	164.121	168.552	147.468	160.965	173.784	169.308	201.551	172.365	171.735	170.5	152.04	170.887	174.52	192.915	155.92	149.813	196.245	164.613	159.127	157.408	145.466	131.276	159.24	158.924	158.968	153.599	121.252	156.525	142.854	132.344
RP1841	9,10-epoxyoctadecanoic acid	C18H34O3	HMDB0061650	133.937	22.0979	167.903	115.818	153.454	122.151	117.861	130.908	112.944	156.31	86.8191	93.0565	108.851	130.428	97.9505	90.1721	91.7808	113.613	122.596	132.765	134.028	122.3	108.097	80.604	99.88	102.64	111.757	84.1425	116.842	91.4995	84.3279	79.979
RP85	9-Oxooctadecanoic acid	C18H34O3	HMDB0030979	311.765	73.1346	361.108	308.534	317.194	283.46	285.029	289.642	265.019	311.482	222.003	250.509	236.768	301.637	289.928	226.007	24.0679	114.129	114.166	144.866	100.216	21.6774	90.8242	66.981	31.9439	90.5307	75.3162	28.0447	61.8659	40.758	54.8977	56.6339
RP909	Acetanilide	C8H9NO	1105-568-611	1471.4	1129.31	1654.81	1803.4	1700.56	1252.22	1778.7	1650.88	2171.99	2096.49	2105.57	1671.35	1701.98	1881.01	1943.85	2043.78	1813.14	1827.37	2167.86	2398.46	2527.72	2276.43	2209.15	2036.83	2613.24	2441.21	2523.02	2242.9	2148.03	3002.58	2733.43	2294.05
TN1580	ADP	C10H15N5O10P2	HMDB0001341	37.154	20.572	30.2168	22.1879	34.859	27.6845	38.9024	27.3703	57.4664	23.2715	71.7572	29.2318	26.6065	33.5875	47.9053	36.6165	40.8798	44.0292	52.5944	39.9104	33.8378	39.6924	38.3198	46.4426	33.9421	54.556	48.4832	39.6815	66.7849	33.6011	48.5774	26.316
RP74	Adrenoyl ethanolamide	C24H41NO2	HMDB0013626	350.58	333.09	412.684	486.523	421.144	425.751	448.093	428.383	399.352	365.748	438.109	440.175	414.947	435.004	295.867	295.459	189.367	180.66	171.084	244.845	225.715	179.478	126.25	146.061	124.358	195.727	124.99	123.487	65.702	354.187	154.664	184.274
TN353	Ajocysteine	C9H15NO3S3	HMDB0041052	82.7707	44.2416	74.3842	74.5011	58.1059	56.0915	75.6372	58.5508	63.5509	84.5741	84.2628	48.6198	34.6822	75.0962	66.3159	84.1194	77.7149	74.1682	76.1306	84.8567	84.6611	91.712	90.6537	84.4946	106.685	96.9791	84.6814	91.1947	103.54	128.751	93.2308	113.115
RP1388	Ala-trp	C14H17N3O3	1086-512-555	127.398	68.1704	93.2105	114.31	81.6248	76.4026	134.423	102.524	109.976	69.3561	114.347	127.044	100.951	99.0666	86.3294	149.228	159.228	117.62	126.354	148.745	113.757	66.2625	151.896	104.664	125.664	123.571	132.743	84.4461	175.852	96.8961	110.608	97.5531
RP1463	Arachidyl carnitine	C27H53NO4	HMDB0006460	36.4414	95.4476	34.6242	42.2408	59.0415	76.2604	43.986	52.3164	113.167	52.0619	178.233	108.74	112.791	70.6542	173.201	90.2612	110.043	73.1268	54.6455	63.8513	41.2251	66.79	83.6256	38.4952	159.531	153.264	129.712	194.286	137.598	159.318	204.204	66.3461
RP1112	Arginyl-Proline	C11H21N5O3	HMDB0028717	15.704	14.242	27.0506	23.8217	19.9591	15.5557	20.7506	17.6248	22.0748	35.0339	28.7261	19.2325	22.735	25.9121	24.8296	24.0154	24.8274	23.4382	21.7155	33.7462	32.7941	39.0602	27.9785	30.1069	33.4901	32.5452	31.0427	24.5404	29.8516	51.7502	46.3506	41.3045
TN583	Arjunolic acid 3-glucoside	C36H58O10	HMDB0040941	25.3249	25.5659	20.3808	21.7045	21.1644	19.5358	23.1072	22.7232	22.5836	22.6649	19.929	19.6109	18.9625	21.8483	22.1438	21.2364	19.3359	20.406	18.0085	20.0734	22.1579	20.251	20.4872	19.9467	20.7482	21.2181	19.5913	17.3455	17.9584	18.4347	17.0908	19.879
RP3392	Ascorbyl stearate	C24H42O7	HMDB0038242	109.642	173.562	128.273	247.96	147.638	88.9579	157.755	135.872	183.567	119.634	241.046	95.838	224.072	112.695	74.5852	187.618	114.474	67.664	184.733	194.362	224.873	177.792	117.186	170.78	508.355	71.9942	84.9443	193.958	256.019	111.282	67.0441	93.5653
RP1497	Asparaginyl-Gamma-glutamate	C9H16N4O5	HMDB0028745	49.8793	68.3092	48.6167	49.1586	56.2337	46.7391	49.4621	46.4449	48.8528	45.0715	46.7434	47.2069	47.0941	51.1014	43.2776	46.4894	40.8165	41.86	48.0947	41.3053	43.1863	42.4295	43.5323	44.3313	41.6693	40.2414	39.1477	58.5123	45.5606	50.7525	44.5345	46.3603
RP3081	Asparaginyl-Hydroxyproline	C9H15N3O5	HMDB0028732	75.5057	88.8038	45.7458	103.532	77.7432	60.2298	89.8961	62.255	97.171	75.2128	109.454	84.9665	106.101	90.5453	62.9894	85.5496	75.7136	61.3607	71.7665	97.7217	93.5964	95.1899	89.0283	81.3609	144.822	56.915	68.0373	114.025	121.26	73.9909	56.1734	63.3339
TN2182	Beta-1,4-mannose-N-acetylglucosamine	C14H25NO11	HMDB0006535	15.1015	25.25	18.565	19.336	19.191	19.0159	18.8112	16.6402	30.8892	45.5343	43.0904	29.3697	10.4098	18.2045	31.0729	27.3655	16.6929	16.9213	16.0433	36.7394	20.4117	30.6213	16.3819	16.2717	26.3519	29.3309	23.4498	48.5796	30.5209	52.5283	39.8327	32.5585
TN1895	Betanin	C24H26N2O13	HMDB0029408	49.0025	43.5061	44.879	45.0366	42.3699	39.4354	45.4874	42.0735	54.246	44.6509	53.933	39.3516	16.9327	40.2593	56.8161	48.3812	41.9545	43.3931	38.643	40.5801	44.492	44.3206	49.4864	38.882	51.1033	62.809	49.7786	47.3978	39.5504	62.0616	53.7489	51.6989
RP534	Biliverdin	C33H34N4O6	HMDB0001008	89.2701	142.499	69.7542	74.8879	108.22	73.5313	85.3197	73.4507	92.1227	92.1638	89.6999	92.352	78.3149	88.6692	98.578	74.4867	56.5501	40.0365	55.4206	35.1248	33.2621	31.4236	41.0425	38.04	49.5881	48.288	58.6016	42.5393	45.5988	65.173	40.3121	37.9946
RP190	cannitine C2:0-d3	C9D3H14NO4	2001-01-01	52.6435	233.265	138.877	190.289	169.346	198.208	187.998	162.209	186.451	161.552	175.587	174.695	187.937	110.216	154.162	157.297	56.8006	53.4887	65.6756	53.8954	63.8532	50.5873	53.2536	75.1815	61.4706	51.165	52.4232	56.9196	49.4522	51.45	55.6211	49.7001
TN180	Cholesterol sulfate	C27H46O4S	HMDB0000653	104.805	108.956	97.7805	94.4202	96.016	96.4806	100.092	93.5853	93.6008	95.4606	92.8962	93.5194	93.5846	89.9134	78.1115	80.9766	73.1259	76.2829	73.8858	78.8377	72.8657	76.3267	77.8882	76.2253	78.7263	75.8931	75.4344	79.037	76.4819	76.4088	76.8626	78.2579
TN2694	Cholic acid glucuronide	C30H48O11	HMDB0002577	125.919	107.201	131.852	141.613	127.472	126.936	142.57	122.219	127.764	112.517	114.633	101.604	68.0354	100.57	94.8563	100.324	91.9154	116.779	91.8913	110.931	107.552	93.5243	97.6866	82.7414	105.808	101.32	111.371	96.0485	108.058	118.835	109.645	100.387
RP1220	cis-4-Decenoylcarnitine	C17H31NO4	HMDB0240585	48.3915	113.431	75.9201	103.089	85.0166	78.3704	89.3206	95.9667	101.819	39.4967	43.6663	56.3192	55.0464	53.7576	35.3523	38.0294	41.6048	73.9734	92.0875	32.6791	67.424	74.1784	55.8303	85.1584	51.8594	45.9979	26.9989	37.2832	33.0743	37.0358	31.0868	34.8559
RP3130	Cis-5-Dodecenoic acid	C12H22O2	949-792-851	44.2268	197.507	162.136	185.285	149.957	138.657	185.269	197.3	180.332	84.4527	80.0557	80.6742	127.628	87.7921	77.9505	67.1043	125.38	224.18	242.836	194.842	212.092	204.645	146.752	255.076	183.826	97.0531	66.9454	95.6252	55.089	55.1256	62.1445	74.9275
TN407	CMP-N-trimethyl-2-aminoethylphosphonate	C14H27N4O10P2	HMDB0060072	106.399	211.438	173.067	196.107	151.372	92.5285	156.226	123.406	97.7972	139.875	86.6984	88.018	20.5994	97.884	66.0264	65.6004	42.8615	48.212	66.4519	107.422	81.8581	103.284	67.2953	56.0061	51.6714	56.858	43.0419	59.4793	36.5196	55.3226	32.6315	42.5627
TN2498	Cyanidin 3-rhamnoside 5-glucoside	C27H31O15	HMDB0037993	2801.74	3152.77	3840.83	2976.21	3504.27	1729.32	3926.58	1841.84	4214.48	2061.67	3817.54	1941.15	2507.2	2766.61	4261.2	2385.61	3576.97	1945.08	4412.7	3351.33	4083.8	4741.22	3499.27	6166.28	1573.94	3791.06	1825.5	3739.46	2559.89	2579.3	3537.8	2499.55
TN1986	Cytidine 2';,3';-cyclic phosphate	C9H12N3O7P	HMDB0011691	187.845	217.838	155.338	225.874	141.062	282.734	152.552	273.767	126.385	324.904	167.91	272.725	191.764	273.669	141.462	270.607	151.54	247.013	106.699	199.326	165.188	151.78	166.1	158.414	299.175	153.073	261.562	171.092	120.696	203.853	154.906	150.802
RP721	D(+)-Tryptophan	C11H12N2O2	896-1248-1383	1400.3	1212.3	1794.22	1864.39	1720.78	1447.87	1734.68	1657.64	2119.46	2370.29	2392.5	1880.22	1927.4	2042.15	2357.21	2398.31	2285.67	2034.99	2077.17	2599.71	2994.61	2789.32	2841.37	2509.73	2972.88	2920.03	2705.49	2555.4	2149.41	3650.47	3539.51	3136.57
TN2322	D-1-[(3-Carboxypropyl)amino]-1-deoxyfructose	C10H19NO7	HMDB0038663	11.1144	12.8832	3.6906	8.17314	10.3443	13.4308	5.22567	4.6522	9.23592	7.1701	12.9758	24.232	2.99363	12.6364	7.76048	13.3799	8.30761	3.62896	7.91567	6.7871	9.35231	8.86418	5.94208	7.06016	15.3245	11.4263	11.6747	9.93363	31.8535	17.6659	9.41922	12.5655
RP2634	D-4';-Phosphopantothenate	C9H18NO8P	HMDB0001016	201.843	105.545	140.053	109.645	82.429	84.7708	190.871	171.48	338.947	187.748	292.811	226.406	243.711	115.376	176.324	123.326	105.457	286.745	705.114	217.22	210.075	178.962	134.357	137.733	137.65	290.799	537.458	254.23	232.977	204.896	212.943	104.657
TN1244	Decanoylcholine	C15H32NO2	HMDB0013228	11.6834	20.1211	14.4265	19.5482	7.62096	11.6168	12.2432	6.69995	11.0208	7.35844	10.6254	7.54469	2.89805	8.50254	5.98645	9.56472	12.0354	9.469	11.4759	10.9908	8.28551	6.12099	12.5807	8.95817	9.17732	6.50766	12.5523	5.38317	6.31135	6.34143	5.33414	3.5231
TN154	Dehydrophytosphingosine	C18H37NO3	HMDB0038057	1.24663	1.4588	2.18541	0.800807	1.81025	2.51209	3.11404	1.31599	1.58549	1.55251	2.9024	3.01788	1.19527	1.6101	2.32105	15.1332	36.596	47.0768	16.3208	36.3317	38.5822	40.8231	10.6416	10.5465	34.6425	38.3311	30.2529	34.9244	19.5041	35.5137	28.5365	7.53632
RP1492	Dephospho-CoA	C21H35N7O13P2S	HMDB0001373	44.641	68.2703	120.595	92.1887	94.4975	54.1467	90.6683	88.2378	71.8724	97.6262	74.9068	73.5436	62.0754	53.0462	47.0971	72.0622	52.4275	51.0703	55.3935	126.965	75.2423	79.2225	68.5038	63.5852	52.9332	51.6223	54.0063	48.77	45.9846	59.279	48.1573	41.8531
RP15	Desmosine	C24H40N5O8	HMDB0000572	443.856	212.41	429.411	401.48	435.838	373.502	357.645	421.923	289.904	259.903	262.492	361.996	242.115	360.162	295.643	380.246	100.118	78.0497	114.681	87.5853	71.8296	45.7461	37.4386	42.4297	44.2025	43.8469	32.5382	9.54945	27.9314	26.2794	29.4413	17.6532
RP2353	dIDP	C10H14N4O10P2	HMDB0003536	66.0643	60.5933	61.4896	51.8835	68.8641	81.6571	64.1499	52.3791	92.3613	54.1414	74.0853	74.2853	84.4435	143.544	86.3817	82.8475	57.8027	70.7656	65.0601	70.225	79.4541	54.7422	61.413	69.0387	94.7933	83.2133	109.677	80.4232	89.2699	82.0147	94.0722	86.101
TN2541	Dihomo-gamma-Linolenoyl ethanolamide	C22H39NO2	HMDB0013625	364.646	244.013	253.99	88.6119	248.672	380.159	229.039	234.86	329.44	210.201	290.205	414.569	93.1068	232.992	380.681	264.637	186.032	422.074	290.9	216.186	152.638	82.5875	191.898	184.059	293.494	328.34	378.949	235.341	343.268	352.769	318.411	226.921
RP449	Dihydrozeatin-9-N-glucoside-O-glucoside	C22H35N5O11	HMDB0012212	37.5401	24.4394	43.5551	43.609	39.1401	50.3265	42.0343	44.7507	51.8679	40.4582	30.2092	29.1594	42.2428	23.0069	37.8331	31.2226	21.4623	30.0049	21.0028	16.17	21.2122	6.73282	24.6882	16.3789	9.68426	23.9851	20.4614	8.02174	21.1507	15.1552	13.1231	11.0158
RP3146	Dl-Cystine	C6H12N2O4S2	800-1405-1643	103.5	134.308	91.1811	113.931	129.641	101.46	128.506	104.149	94.4696	139.33	112.664	116.556	91.5865	142.488	125.796	115.31	128.012	67.8917	74.6527	113.927	149.748	111.916	124.081	103.115	123.74	99.2742	95.7836	99.1832	60.5422	115.323	175.66	112.908
RP569	Dl-Dihydrosphingosine	C18H39NO2	799-149-174	34.477	81.8871	45.7652	55.6165	55.8262	63.4735	58.7561	32.0492	64.7506	38.0485	41.9942	36.2488	44.9257	38.1298	44.3683	48.6621	64.5841	113.71	80.2925	79.5393	61.1297	82.498	69.7257	56.8754	68.2589	85.2949	77.4136	89.5586	65.5336	64.2191	72.116	35.5632
RP1125	Dl-Valine	C5H11NO2	775-1251-1386	1865.07	2115.01	1930.45	2052.72	2036.64	1980.52	1781.9	2331.52	2673.37	1970.62	3930.51	2220.29	2597.57	1845.63	2708.13	2276.1	2352.83	3262.06	3892.86	2183.67	2218.96	2264.96	2765.6	2669.1	3012.03	3760.23	2945.7	4707.5	4577.12	3048.7	2670.84	2437.42
TN1548	D-Maltose	C12H22O11	773-1126-1193	186.536	78.9419	198.47	20.5842	159.593	49.0181	149.937	33.0448	182.532	56.8041	196.962	69.5746	52.8589	95.4512	218.383	66.7923	67.8688	89.7766	97.6873	133.716	111.881	30.7339	111.941	51.7034	72.0806	182.688	202.552	130.111	380.544	445.661	410.501	149.405
RP880	D-Mannitol	C6H14O6	772-1254-1390	505.4	392.327	575.557	647.273	593.185	436.083	620.442	570.326	736.539	732.595	746.18	587.032	598.75	672.833	700.17	742.538	649.339	647.963	757.724	843.415	865.069	806.998	794.861	723.226	939.858	871.784	885.701	786.037	744.901	1066.88	958.992	843.104
RP756	D-Methionine	C5H11NO2S	770-1152-1228	1371.22	1102.77	1501.57	1440.77	1297.88	1135.59	1258.58	1253.59	1550.35	1629.25	1879.32	1671.51	1570.59	1564.61	1633.25	1587.1	1616.1	1592.96	1645.72	1842.72	2220.45	2173.48	2207.88	1823.11	2020.67	1924.12	1898.51	1890.56	1948.33	2747.15	2668.67	2148.89
RP1409	Docosadienoate (22:2n6)	C22H40O2	HMDB0061714	1159.85	1738.72	1621.23	1431.14	1253.27	394.902	273.807	243.979	266.167	262.252	275.018	275.033	255.037	290.206	248.109	273.412	229.95	217.027	245.713	258.763	251.697	243.55	229.36	240.949	275.275	221.246	210.227	175.489	187.038	156.286	192.075	193.605
RP1063	Dodecylamine	C12H27N	762-1338-1554	231.12	163.913	131.213	158.33	99.079	92.4332	89.0743	87.2469	118.18	130.991	118.5	68.979	53.0541	65.8184	55.0619	65.5601	46.7335	51.716	48.328	44.5728	46.205	57.452	47.1651	49.5194	47.7539	42.4985	46.3137	52.9425	51.9491	53.7368	52.971	54.5532
RP1024	Dopamine 3-O-sulfate	C8H11NO5S	HMDB0006275	115.626	81.5147	139.211	154.707	108.522	109.079	153.37	147.142	134.031	147.599	121.19	140.757	106.462	121.147	114.775	154.793	175.577	152.215	181.359	167.148	189.371	145.852	180.9	177.468	191.034	160.333	161.227	127.983	143.568	113.872	219.25	217.224
RP1195	Doxepin N-oxide glucuronide	C25H30NO8	HMDB0061139	37.8656	49.2785	42.7633	88.2167	63.2204	67.5755	66.4786	53.0386	97.6177	90.58	126.648	131.58	101.524	91.7899	69.6194	84.5581	94.1759	24.9024	88.0449	76.3461	86.9859	116.327	48.7051	82.2243	112.57	85.085	89.3161	112.073	172.94	162.732	159.967	112.874
RP530	D-Pyrrolidine-2-carboxylic acid	C5H9NO2	756-1358-1580	1637.17	1282.25	1820.09	1909.99	1850.68	1738.92	1971.78	1823.91	2220.19	2016.81	2391.38	1971.51	2075.32	1966.5	2262.04	2390.71	2526.13	2536.68	2512.76	2325.68	2600.21	2315.23	2508.38	2537.05	3042.14	3065.73	2906.99	2653.04	2466.62	3048.62	3037.51	2910.43
TN200	Drotaverine	C24H31NO4	HMDB0015669	140.797	93.4125	146.646	122.4	133.578	136.274	151.219	126.323	131.257	107.014	160.993	120.951	46.1187	153.291	114.263	131.421	101.905	101.279	116.401	104.076	84.132	62.7826	76.4416	66.4349	88.0891	85.6213	84.8086	71.4578	80.0303	91.576	64.7536	65.7183
RP1677	Droxidopa	C9H11NO5	HMDB0015627	66.9805	32.9907	66.431	114.732	62.3258	65.1709	87.1955	62.4874	95.3434	47.0145	50.9592	104.468	65.1558	113.275	119.698	128.603	205.949	98.7837	128.806	65.7495	79.2182	79.0162	118.029	103.785	184.707	133.306	95.4228	97.2746	48.7506	67.7584	72.1339	74.3371
TN2222	Estriol-16-Glucuronide	C24H32O9	HMDB0006766	59.8873	42.5259	54.0932	61.004	70.7557	43.2472	80.283	51.6043	31.9987	102.621	96.5234	55.3874	12.3074	62.8402	45.6847	72.5989	57.8922	41.7184	74.8568	76.293	39.6256	27.2745	35.1564	40.9743	87.5038	65.1022	58.9703	64.4556	113.69	59.6349	59.0995	62.4686
RP1625	Ethopabate	C12H15NO4	725-863-924	51.4601	58.209	81.9933	79.4814	70.4404	51.3695	64.9465	63.7028	75.3912	104.468	90.257	138.692	61.7579	79.1772	90.6839	83.9396	74.7352	52.6471	43.3654	83.9759	102.84	115.871	98.3493	96.523	93.6737	78.0631	79.7098	89.7713	144.539	185.786	143.639	146.017
RP373	Ethyl Arachidonate	C22H36O2	HMDB0062725	1054.66	99.9829	1148.68	763.372	946.786	996.246	1707	1519.68	1032.61	1310.23	759.01	865.711	810.056	751.893	773.79	595.003	415.743	132.817	278.521	187.988	278.539	358.802	96.0148	166.944	141.775	75.2964	94.1889	19.7432	23.8403	27.9125	7.69715	29.1725
TN1425	Ethyl N-benzoyl-L-tyrosinate	C18H19NO4	721-1279-1424	160.628	124.3	150.364	91.9482	167.04	232.7	113.163	126.672	200.426	101.561	135.355	162.263	69.6385	138.969	261.57	232.509	176.386	220.403	116.085	147.172	162.119	52.4081	145.655	150.144	227.64	218.555	293.478	198.999	327.824	287.5	223.354	217.957
TN1150	FAHFA(22:6(4Z,7Z,10Z,13Z,16Z,19Z)/14-O-22:6(4Z,7Z,10Z,13Z,16Z,19Z))	C44H62O4	HMDB0112171	4.15665	16.9227	12.8967	17.5637	14.7608	11.719	16.0048	13.5133	13.2909	13.5388	12.8393	21.7729	5.02452	13.697	13.0042	17.3289	19.493	16.1802	12.8766	16.5405	6.80274	7.79352	5.77693	7.83978	17.9756	19.0758	12.4083	10.2104	14.344	11.1626	12.4453	4.20559
TN967	FAHFA(22:6(4Z,7Z,10Z,13Z,16Z,19Z)/9-O-18:2(10E,12Z))	C40H62O4	HMDB0112169	10.0707	11.701	27.2405	18.7769	14.9115	22.1738	12.2804	18.1264	7.06842	9.96251	9.03726	13.1247	4.94595	5.30112	12.5862	14.243	1.27474	13.243	7.31809	29.7473	6.46897	6.57093	6.32012	10.4383	6.18229	11.5835	13.0505	2.70586	2.9788	1.78884	0.0873748	8.009
RP912	Farnesylcysteine	C18H31NO2S	HMDB0011627	52.6775	38.9994	76.7265	74.4453	75.9439	72.2936	84.4139	82.9065	139.639	88.7935	119.526	74.1097	98.1477	75.3888	127.804	133.191	94.2134	99.7223	144.448	113.284	112.635	120.164	129.825	93.2663	118.582	150.203	141.402	117.871	133.84	192.013	146.194	132.167
TN164	Flavin adenine dinucleotide	C27H33N9O15P2	706-662-709	120.111	125.495	133.774	126.22	105.591	109.578	129.539	115.094	124.732	128.329	129.623	113.363	21.0623	121.75	117.361	119.293	86.7835	89.025	98.4205	86.1328	81.7159	89.0241	71.27	69.7616	78.0337	86.7285	79.2015	80.6583	61.3311	84.136	73.6747	64.3759
TN1754	Galabiosylceramide (d18:1/26:0)	C56H107NO13	HMDB0004839	9.62106	11.3085	7.39092	6.41589	14.3532	12.9132	10.7099	7.79464	11.6784	4.30788	9.1549	9.1564	7.5595	5.89633	11.5807	9.90522	6.92498	11.9694	10.3861	6.21106	6.76876	6.38875	6.92686	10.2395	9.71784	9.18026	11.4192	7.25299	11.718	8.3543	7.32845	8.64193
TN2598	Galabiosylceramide (d18:1/26:1(17Z))	C56H105NO13	HMDB0004838	4.75719	10.0285	5.30536	8.52674	12.9133	7.52381	7.47539	8.5376	8.62573	3.35762	5.09501	7.66265	4.10348	5.22365	11.945	9.26446	7.07379	7.9133	7.70183	8.21187	5.43845	5.16438	11.4883	10.854	11.4643	6.46869	9.49789	6.12914	8.16331	6.79363	5.04334	5.46969
TN1510	Galactosylglycerol	C9H18O8	HMDB0006790	30.4513	36.4722	39.9046	38.4174	32.4144	23.1235	32.1519	32.2166	36.8208	49.1632	49.7523	33.8303	9.30223	40.9849	45.884	39.164	30.1199	22.248	16.3423	37.1879	46.395	52.007	42.2772	35.9433	44.2268	39.2934	35.0623	40.4395	36.1996	90.9023	56.0163	65.0852
RP2962	gamma-Glutamyl-beta-(isoxazolin-5-on-2-yl)alanine	C11H15N3O7	HMDB0040515	89.0704	118.231	117.826	114.191	109.565	85.5111	92.4249	85.5702	90.5493	74.0061	94.2717	131.476	118.356	101.066	117.94	100.643	99.6938	97.9233	83.4506	70.3242	73.3117	113.492	123.596	91.5462	99.4755	95.3108	53.1202	75.2063	97.8173	94.9642	101.048	99.055
TN844	Ganglioside GA2 (d18:1/12:0)	C50H92N2O18	HMDB0004888	37.2249	39.8182	60.0954	35.1247	42.3684	71.9335	48.0887	61.413	28.6011	17.2371	19.0934	36.9132	3.20675	28.1083	20.0652	32.1325	29.887	31.1013	37.8356	51.9564	35.8862	18.6648	34.3957	34.8309	21.488	22.9282	28.4218	23.1355	17.824	21.6269	16.7658	19.8368
RP778	Gladiatoside C2	C29H26O12	HMDB0036254	13.9259	20.3901	24.9483	24.1522	18.5705	24.777	19.2302	19.6644	17.6931	26.5791	20.2509	23.244	16.3843	29.9918	29.5003	28.4372	29.894	24.3974	21.1262	26.9233	31.6823	31.5775	37.9499	38.0795	35.2072	29.0645	32.416	24.8305	29.1909	35.7336	34.7328	45.3453
TN1874	Glucoliquiritin apioside	C32H40O18	HMDB0041149	58.5461	71.4195	35.2926	48.0346	60.6855	33.579	59.7105	50.9018	69.0065	37.5495	60.7285	53.7431	35.9546	47.6878	41.7154	49.3222	53.3695	53.5503	40.5861	73.0234	68.3323	54.5171	55.1702	64.1656	44.1233	46.0847	47.0978	62.1461	47.7547	44.4041	31.4697	43.2974
TN954	Gluconate	C6H12O7	667-1233-1355	32.0854	47.3103	48.086	57.2367	44.8681	31.4022	47.712	37.9219	31.6357	53.581	36.7203	32.4343	14.4752	41.222	48.329	40.9741	46.1839	36.5079	26.3937	82.6946	67.4473	80.3619	59.1162	60.9586	56.1921	58.2346	46.5266	55.4113	38.3705	86.4772	84.347	104.689
TN668	Glycochenodeoxycholic acid 3-glucuronide	C32H51NO11	HMDB0002579	910.359	859.991	1104.04	1020.49	980.155	916.462	942.775	853.453	608.754	907.729	683.749	582.882	291.183	648.423	467.304	538.948	553.769	577.577	536.869	839.582	840.548	671.618	589.687	745.292	557.164	477.938	549.639	442.018	530.132	598.357	514.767	582.968
TN304	Glycohyocholic acid	C26H43NO6	HMDB0240607	81.8458	80.9821	72.3537	74.1653	70.5031	67.4908	72.9506	68.4209	71.17	70.1347	68.6364	68.8942	63.9871	64.8721	60.1809	62.2347	60.6658	58.2822	56.8152	59.9827	58.9406	55.8259	60.4842	61.9846	62.4455	59.2018	60.409	58.3455	59.6922	58.0684	57.5932	60.7885
TN316	Glycylserylprolylmethionylphenylalanylvalinamide	C29H45N7O7S	HMDB0033242	56.4788	59.1099	99.4759	48.2651	45.7905	68.7858	54.5328	46.2969	40.6689	44.9479	43.0568	26.1194	11.5167	39.0793	32.5878	33.9109	19.2956	23.0505	18.9734	27.7096	29.9528	24.6281	18.9023	23.4262	23.7813	24.9018	19.9915	18.7615	20.2177	20.811	16.5858	18.0335
RP1744	Gly-Tyr	C11H14N2O4	653-259-294	57.6157	50.6804	120.085	108.047	87.4395	60.8389	169.068	74.0894	147.951	120.001	157.572	60.0925	134.073	76.3557	81.0116	159.257	172.489	174.848	164.308	166.791	127.547	120.976	134.762	174.989	127.063	147.479	199.704	113.341	74.7189	78.0083	81.1398	75.2812
RP3417	Guanosine triphosphate	C10H16N5O14P3	HMDB0001273	83.0485	92.9	50.9576	15.1682	111.145	105.608	52.8492	40.3517	83.7428	87.0111	64.5877	104.596	133.34	70.3862	114.25	53.9614	37.2298	99.2942	78.1389	52.2242	57.8477	36.8505	68.3831	62.8373	85.3529	93.3728	121.198	100.095	79.0971	100.441	107.539	101.122
RP1843	Heptadecanoic acid	C17H34O2	HMDB0002259	645.856	623.428	652.083	832.5	664.741	594.297	727.967	723.007	759.648	870.03	739.556	564.752	547.205	628.326	566.466	675.098	642.725	760.775	566.824	697.085	853.119	787.28	813.966	878.805	641.306	586.239	693.9	736.162	851.969	940.525	624.758	769.228
RP1096	Heptadecanoyl carnitine	C24H47NO4	HMDB0006210	19.4878	9.29149	5.02338	5.64069	13.2895	23.1348	6.94022	9.60325	30.8855	1.05996	19.6506	33.613	25.1251	12.327	16.9386	29.4676	32.5502	34.2498	29.0973	14.03	15.1717	12.9305	24.9292	11.4668	35.6552	39.5467	38.2819	31.3603	56.0887	28.8121	26.4454	9.35828
RP1950	Hexadecan-1-ol	C16H34O	1464-221-255	1743.06	885.55	2681.1	1812.65	2302.76	2146.7	1935.66	2231.13	2077.98	2276.55	1787	1665.23	1694.05	2349.06	2030.29	1540.2	1864.36	2788.07	2825.95	3436.16	3496.85	3110.73	3184.96	1892.55	2924.45	3052.65	3314.06	2263.57	2732.31	1897.6	2399.03	2050.62
RP113	Hexamethylene bisacetamide	C10H20N2O2	HMDB0041901	16.6372	140.355	74.1592	116.197	110.289	122.81	124.547	110.26	122.48	101.05	97.9012	96.9217	108.007	84.2759	93.2474	86.7925	16.3692	19.538	24.8058	19.5844	26.3397	14.4623	15.6098	24.3241	11.664	9.32698	12.2866	12.2823	16.9454	13.0688	12.6016	13.7982
TN1078	HHPAA sulfate	C8H9NO6S	HMDB0240380	87.0313	38.4307	87.6484	109.403	79.9267	78.4556	70.3378	93.3993	29.782	104.192	82.1497	72.4931	17.5126	74.0165	82.9096	53.2893	58.6914	72.7696	109.903	104.975	78.7291	94.6662	30.5533	94.3302	30.868	34.3277	51.3028	70.8966	38.1565	57.6654	21.8555	40.5688
TN2357	Hispolone	C12H12O4	HMDB0041442	7381.43	7752.98	6185.52	7230.37	5742.54	6114.8	6020.99	7927.53	4826.59	9770.47	5371.83	7749.93	3188.98	9838.14	6331.66	9477.06	7594.84	6953.01	5731.82	9916.18	7518.6	7670.71	6970.77	6843.04	6467.63	4597.86	7268.77	5306.44	6261.3	8118.61	4716.57	6215.98
RP202	Histidinyl-Histidine	C12H16N6O3	HMDB0028887	34.9348	23.2739	29.3512	34.6556	32.9973	41.4349	29.8047	37.1637	32.5609	37.2984	32.3762	45.3184	43.2078	41.2958	47.0641	48.2132	53.578	57.8114	54.722	64.0851	49.1355	50.5052	61.2101	59.6923	48.0613	58.0346	56.8919	47.9712	57.4657	46.3512	58.5956	46.4933
RP1261	Homoarginine	C7H16N4O2	621-1191-1278	151.076	155.165	220.211	242.172	220.78	205.097	249.039	239.852	245.551	274.769	301.053	214.931	219.25	235.793	233.388	269.62	266.751	265.801	279.948	276.394	263.268	271.564	268.956	254.639	335.816	370.689	314.385	285.817	253.991	302.045	286.96	270.974
TN2708	Homocitrulline	C7H15N3O3	HMDB0000679	40.5095	41.208	33.8971	23.7827	42.8911	46.7474	21.2792	27.431	27.2066	19.1414	22.5326	25.4387	31.2438	19.1265	30.9475	27.8164	43.8973	38.2746	41.8125	27.2593	40.7969	3.56774	24.7043	39.4078	4.65315	41.7958	27.7589	35.4065	26.6954	25.0259	32.85	26.8348
RP1320	Homocysteine thiolactone	C4H7NOS	HMDB0002287	4.89266	6.02113	6.18989	7.24082	7.52146	3.38401	5.45089	7.84242	11.0369	13.4865	10.1293	4.68958	8.92605	6.50567	7.65715	8.92758	6.99475	8.54973	7.77914	6.91996	11.0843	6.43637	2.4083	8.19273	10.0019	8.69855	10.0365	9.69024	17.8363	21.3673	15.7141	17.7537
TN1851	Hydroxylated N-acetyl desmethyl frovatriptan	C15H19N3O3	HMDB0061151	84.9302	64.4558	104.798	102.358	50.7924	36.4367	51.8022	44.3002	72.1256	107.407	94.1467	36.6795	55.8877	86.5	82.597	45.5655	76.9816	40.8527	63.8088	105.538	93.7174	97.9512	99.0983	90.6957	60.1732	99.9212	80.9574	87.8093	71.9617	100.796	92.6923	91.4271
TN898	Iberin-cysteine-glycine	C10H19N3O4S3	HMDB0240534	63.429	39.7582	70.5508	42.82	62.8709	38.1955	55.9367	76.5718	106.242	70.0962	72.7911	31.0607	36.8523	66.6227	85.7658	117.315	109.396	74.8825	76.9855	140.961	91.1028	68.5883	82.7361	62.3153	68.852	80.3414	126.973	82.0713	80.621	193.564	124.331	123.737
TN772	Indole-2-carboxylic acid	C9H7NO2	607-1502-1750	5.6062	6.68464	5.21042	5.55277	6.78538	4.87062	5.58766	6.143	6.98127	6.04581	7.88568	5.5554	2.84153	7.75583	6.81509	7.36784	6.67451	6.5679	6.54008	7.05882	8.2855	8.18426	7.3107	6.20762	7.8922	10.8811	8.75729	7.60418	6.78797	8.51617	9.48667	7.17604
RP2650	Indole-3-carboxilic acid-O-sulphate	C9H7NO5S	HMDB0060002	41.2594	25.3249	46.365	32.5408	63.3244	48.2986	45.6977	46.1686	91.2797	59.8144	63.6614	33.7973	60.524	34.5319	56.4747	60.2343	38.1337	58.5428	50.7799	58.2491	51.0542	32.2399	41.6389	41.2245	60.089	79.2318	80.4974	44.9063	42.0028	62.5636	51.5608	45.995
RP832	Indole-3-pyruvic acid	C11H9NO3	603-300-337	470.16	359.239	523.621	542.128	555.336	444.744	688.523	622.226	867.593	737.741	842.136	543.968	621.612	556.017	595.615	681.97	628.415	726.959	839.715	853.953	973.592	710.514	746.615	704.184	969.978	1017.06	1062.59	864.569	859.118	1203.31	1027.66	886.393
RP2648	Indolylacryloylglycine	C13H12N2O3	HMDB0006005	202.76	196.177	235.568	214.774	226.234	256.839	116.689	104.331	118.462	133.813	145.65	159.97	209.454	174.956	234.715	248.702	233.452	101.494	145.159	183.931	188.79	230.132	263.785	247.593	187.596	102.381	96.6895	132.909	149.36	178.357	209.089	234.785
TN2036	Inositol 1,3,4,5,6-pentakisphosphate	C6H17O21P5	HMDB0003529	32.5453	22.5	20.0693	19.497	31.0878	33.7062	22.7507	25.8445	32.5038	14.307	25.8743	31.2824	28.6799	20.2481	25.708	38.2988	24.7786	35.0768	30.6022	18.0361	25.6376	20.5105	31.8083	29.4819	30.5892	29.1692	29.3718	24.9846	29.9555	30.9091	24.6988	23.8981
RP2573	Isovalerylglutamic acid	C10H17NO5	HMDB0000726	30.8755	66.4167	37.1469	92.4013	57.8442	67.066	53.3803	35.4895	102.308	111.097	162.249	158.024	96.4102	123.156	74.2031	121.975	41.3724	13.1282	20.907	45.1046	40.4012	68.0619	11.5384	12.9328	122.021	62.7159	64.0905	148.857	218.997	156.294	110.708	58.1418
TN2419	Kaempferol 3-sophoroside 7-glucuronide	C33H38O22	HMDB0038769	30.1954	27.7639	26.2807	36.7792	20.2119	23.775	9.95123	14.9454	18.5509	34.5444	23.7643	37.7171	20.8027	31.0013	14.5165	26.1867	24.4844	32.8142	19.3487	28.6903	23.8593	34.5304	29.4176	22.8032	22.7914	10.0139	18.2976	41.1884	11.8869	30.4394	11.8162	19.2649
TN1240	Kaempferol 7-(6';';-galloylglucoside)	C28H24O15	HMDB0037439	56.3675	408.054	509.016	419.681	152.115	52.9291	353.743	373.441	82.2934	757.289	535.528	193.261	100.876	743.709	407.538	134.211	11.0188	5.02714	6.11745	511.653	228.699	430.016	63.7188	191.198	12.7908	8.88174	8.66772	33.4819	9.32348	299.418	38.8083	346.102
TN2272	Lactodifucotetraose	C24H42O19	HMDB0006587	47.3051	122.409	28.8293	42.3227	37.1212	47.2627	58.4232	30.7134	60.521	68.6991	46.5941	57.059	11.5022	98.3045	53.5409	59.8308	39.4413	27.0553	19.7647	71.2731	60.2967	55.6773	46.3352	29.2791	179.641	44.2609	57.8016	34.1608	119.241	79.2013	43.9648	70.3353
RP2098	Lactosamine	C12H23NO10	HMDB0006591	415.913	524.654	200.601	466.11	404.975	432.013	518.377	443.898	601.575	521.232	462.765	447.37	513.532	477.916	376.414	376.961	443.077	442.178	533.218	618.718	496.937	569.438	506.235	506.932	656.989	536.868	492.256	627.367	349.561	491.836	454.725	492.826
TN851	L-Canavanine	C5H12N4O3	547-30-30	13.5697	15.4802	14.165	13.3866	14.0637	14.0535	14.0433	12.6038	14.3067	14.3499	12.9455	14.8889	13.5747	12.9976	12.8131	12.3472	12.7875	12.5225	12.4344	12.9429	12.4701	12.0743	12.1471	12.7376	13.3987	13.3024	12.499	13.286	12.2313	12.5775	12.7782	13.13
TN1395	L-Citramalyl-CoA	C26H42N7O20P3S	HMDB0006345	35.3265	33.3605	43.8473	31.9883	43.8187	17.4034	43.4544	21.1063	36.042	36.7837	45.0461	24.8145	27.974	37.6099	44.1501	26.7991	40.7695	32.5946	40.9565	47.9517	47.6897	53.9916	58.4319	39.7761	47.7477	49.5099	24.6956	51.0756	36.6307	63.4298	47.9178	46.6026
RP924	L-Citronellol glucoside	C16H30O6	HMDB0029850	19.8676	60.8869	64.7498	29.5378	39.4643	34.1456	39.4291	47.7897	38.3223	32.8725	63.5815	41.3393	88.1852	46.2776	40.6104	49.6688	225.412	205.096	192.275	166.774	160.671	121.161	188.552	166.66	212.272	25.4249	110.701	57.1018	59.565	35.8883	73.7983	29.5178
TN699	Linoleoyl ethanolamide	C20H37NO2	HMDB0012252	403.726	244.732	283.033	76.1418	354.232	482.696	311.185	250.419	386.52	189.778	253.767	357.96	66.5511	205.236	239.202	203.423	18.5001	334.544	37.0946	114.516	31.4561	18.0863	21.1883	89.7649	165.21	183.463	249.51	85.5982	243.744	246.959	230.804	194.752
RP1270	Linoleyl carnitine	C25H45NO4	HMDB0006469	715.252	429.104	856.648	597.985	645.253	772.14	677.773	640.665	439.825	425.821	287.169	426.293	446.964	366.805	342.688	394.347	472.901	553.796	562.496	753.058	669.979	395.128	527.125	608.61	339.332	326.478	338.982	228.083	326.84	248.357	302.035	267.811
RP3217	Lithocholic acid glycine conjugate	C26H43NO4	HMDB0000698	70.5572	75.0584	56.0282	46.7931	55.9301	64.8377	61.9963	54.0576	54.9481	62.613	51.5738	60.0626	53.0651	58.9882	54.31	55.9019	53.2248	64.6979	61.1629	59.5342	62.3415	56.8305	54.2782	56.0239	53.2201	56.7119	59.3266	49.7952	55.7741	40.3705	53.2518	57.7541
RP448	LPC 19:0	C27H56NO7P	2004-04-04	4.69562	59.457	32.2494	58.9904	53.7785	36.27	37.4422	39.2196	36.754	10.478	7.66707	5.82928	5.7981	5.94333	4.38989	4.50026	172.169	450.803	297.484	518.663	501.376	480.593	527.684	480.392	364.052	263.585	291.322	280.078	132.382	211.632	341.295	355.265
RP1041	Methyl linolenate	C19H32O2	458-212-245	579.939	118.882	667.182	217.705	427.55	314.032	328.357	415.348	490.406	331.101	262.267	425.141	348.042	375.639	135.452	403.929	109.461	116.213	85.9176	154.187	143.365	126.399	202.314	145.617	116.997	60.3075	90.8888	67.5513	69.4484	47.3707	137.35	147.794
TN1985	Metyl palmitoleate	C17H32O2	437-211-244	45.5769	11.2646	49.5131	22.9254	37.4983	41.3216	46.8162	42.3749	32.1155	21.2568	24.5761	30.2796	52.4797	22.1916	53.2392	44.1228	9.66764	37.0368	97.5631	84.0453	82.0457	89.5845	114.993	121.811	12.3719	9.11118	8.74555	7.29243	11.5004	8.58302	6.76983	7.86286
TN1217	Mevalonic acid-5P	C6H13O7P	HMDB0001343	44.8555	43.0386	29.3535	7.49555	48.7102	40.6795	29.8939	27.68	37.9374	23.6044	41.609	50.1931	43.46	41.6799	51.202	33.86	33.5552	59.6278	29.1724	29.0956	41.8212	25.2345	43.5251	41.1003	55.2166	69.5784	61.1865	53.4968	51.6603	53.7395	62.7541	55.3741
TN1052	MG(0:0/13:0/0:0)	C16H32O4	HMDB0072861	2450.79	2058.41	2534.84	1626.96	1168.25	1441.58	1733.13	1471.34	468.599	615.673	477.522	891.183	244.637	574.221	392.175	604.639	3995.71	4231.38	3053.84	3675.52	2951.68	1773.52	3932.85	3716.33	1435.84	630.177	1423.97	437.926	816.865	796.614	758.41	976.041
RP2682	MG(0:0/18:1(11Z)/0:0)	C21H40O4	HMDB0011536	196.371	3142.36	598.556	562.221	502.232	621.765	580.652	537.136	600.496	563.597	464.907	372.551	393.286	495.642	448.48	541.829	564.468	368.529	429.104	821.989	712.122	681.825	343.485	412.839	542.998	1141.8	307.296	510.435	143.187	1483.55	410.844	939.56
RP1119	MG(0:0/18:2(9Z,12Z)/0:0)	C21H38O4	HMDB0011538	1047.91	167.621	248.131	256.055	310.463	244.441	245.852	252.763	128.836	198.451	146.459	136.447	157.958	188.019	132.712	155.474	89.2764	88.081	132.488	156.076	99.4583	72.9156	84.0685	92.2204	188.404	51.5583	89.8381	30.1684	144.537	52.732	107.468	60.8993
RP2802	MG(0:0/20:2(11Z,14Z)/0:0)	C23H42O4	HMDB0011544	89.5136	155.322	31.2202	102.975	93.0308	86.74	200.091	69.2229	245.054	108.609	250.976	129.554	160.43	206.22	114.973	223.581	65.1916	53.1945	148.423	82.382	109.843	97.613	68.477	87.8842	413.534	93.7065	103.989	217.377	1122.77	350.566	163.726	267.127
RP1315	MG(0:0/22:0/0:0)	C25H50O4	HMDB0011551	18.0931	13.8175	21.5832	24.4392	27.5169	22.8668	21.0943	21.225	0.540285	0.714221	0.732508	0.334638	1.27358	0.607328	0.996615	1.35103	21.7186	29.517	27.5012	24.6521	26.6901	18.3084	18.203	24.7493	0.995366	0.558485	0.602378	0.962677	0.311498	0.274547	0.775331	0.687134
RP965	MG(0:0/22:2(13Z,16Z)/0:0)	C25H46O4	HMDB0011553	305.128	224.072	161.767	229.288	226.286	305.386	143.992	178.729	325.265	155.089	538.329	553.146	501.633	285.841	329.77	414.194	829.121	765.423	524.181	259.001	288.709	314.257	489.966	312.633	791.878	771.186	552.353	736.509	748.082	367.657	411.956	189.5
RP1410	MG(0:0/22:4(7Z,10Z,13Z,16Z)/0:0)	C25H42O4	HMDB0011554	2112.27	598.466	392.005	831.337	729.695	1466.53	474.272	559.413	839.089	317.872	726.927	1907.02	820.698	834.853	503.461	857.184	2256.93	2374.89	2549.83	857.741	1004.5	798.983	2060.13	1438.89	1915.99	1254.03	1947.4	889.159	4193.41	936.562	1017.89	620.189
TN786	MG(0:0/i-13:0/0:0)	C16H32O4	HMDB0072870	165.675	101.563	92.1329	98.9142	101.933	101.917	97.2619	83.3264	86.5277	78.6691	95.6802	106.233	30.4952	81.3753	88.9624	82.2481	282.863	304.714	96.7941	69.9788	70.0976	98.924	70.2955	61.8534	342.777	545.817	395.195	537.388	208.489	384.299	63.2698	41.3874
RP1638	MG(0:0/i-16:0/0:0)	C19H38O4	HMDB0072873	659.285	505.905	833.465	634.749	727.332	868.673	782.345	698.861	715.691	506.231	476.469	583.956	617.694	504.535	536.18	626.742	720.282	807.336	1118.25	1093.36	901.922	648.289	807.541	823.266	656.572	726.528	815.243	530.665	759.086	679.734	692.406	578.188
TN460	MG(14:0/0:0/0:0)	C17H34O4	HMDB0011561	6.21858	4.18863	2.31064	2.64533	2.71656	3.25373	6.39389	2.89858	1.87435	4.11138	4.57247	81.2684	4.20497	47.4158	54.0718	67.83	251.682	243.71	235.605	263.866	220.359	166.468	243.002	236.019	121.029	86.7311	121.853	56.4071	90.2793	82.4686	84.0249	93.167
RP892	MG(18:0/0:0/0:0)	C21H42O4	HMDB0011131	46.9919	58.3514	30.9237	42.7104	40.6308	36.4939	50.5895	54.9708	43.2913	49.7401	40.5928	58.9019	50.6814	101.112	77.0613	147.777	275.449	308.129	335.864	295.491	285.405	474.942	215.891	410.354	137.9	131.481	99.2863	119.569	79.9745	51.161	35.4296	50.2462
RP811	MG(18:2(9Z,12Z)/0:0/0:0)	C21H38O4	HMDB0011568	8.0686	2.19296	3.36833	2.50001	2.9208	3.82863	4.51137	2.33985	3.69723	2.75476	2.80215	3.32601	6.048	4.3773	4.31225	2.16014	364.647	253.252	984.086	610.555	563.344	460.068	277.72	631.548	1166.18	438.46	572.64	185.72	1695.65	423.475	852.068	328.979
RP624	MG(a-21:0/0:0/0:0)[rac]	C24H48O4	HMDB0072855	130.241	124.455	122.349	117.678	123.252	121.955	126.541	127.295	124.934	122.745	123.939	126.616	123.41	127.446	122.798	123.391	135.446	127.714	140.631	129.235	133.276	135.675	140.718	135.105	137.05	122.476	135.425	131.006	137.084	128.162	128.449	135.122
RP285	3-alpha-Androstanediol glucuronide	C25H40O8	HMDB0010339	180.096	87.1084	239.434	205.774	184.821	158.95	159.881	187.955	128.195	162.937	146.531	181.656	140.264	181.824	139.477	205.984	136.351	98.462	144.105	122.676	119.795	74.6075	53.2283	78.0143	103.049	92.5269	84.3917	47.2199	56.421	87.9715	77.0329	39.2283
TN116	3alpha-O-trans-Feruloyl-2alpha-hydroxy-12-ursen-28-oic acid	C40H56O7	HMDB0038021	214.62	215.328	183.853	188.861	177.004	175.021	177.667	170.033	176.074	177.122	176.897	172.816	158.735	172.677	161.371	166.201	140.969	143.695	141.816	149.826	146.895	153.564	150.638	144.487	147.076	156.181	147.18	145.991	145.05	150.172	152.75	142.435
RP995	3-carboxy-4-methyl-5-pentyl-2-furanpropanoic acid	C14H20O5	HMDB0061643	189.27	211.608	163.521	148.238	189.967	193.92	187.161	174.91	197.292	163.282	163.78	196.212	166.511	177.771	184.043	170.424	142.076	161.01	147.643	128.657	121.506	156.428	151.008	173.011	135.264	136.204	130.468	155.683	125.235	124.821	134.527	137.045
TN1292	3-Hydroxy-5-methylhex-4-enoyl-CoA	C28H46N7O18P3S	HMDB0060373	14.5604	10.5642	21.9903	14.2366	23.7816	7.71331	19.6315	9.00362	20.8483	15.1954	20.1634	12.5179	15.3427	15.4465	26.691	10.8328	23.5023	12.6184	12.9473	17.5717	26.4633	30.8451	19.7997	24.6264	20.635	22.4661	13.7741	17.906	15.1623	15.2628	25.675	23.0411
TN2470	PA(10:0/19:0)	C32H63O8P	HMDB0114775	47.9516	49.0999	45.71	38.2938	38.4978	38.3163	46.184	47.113	37.0251	34.4687	36.2355	33.5732	37.5959	31.7977	39.3936	30.4266	30.2475	41.4888	31.1778	29.9208	44.3434	28.3413	30.0628	31.7661	46.4564	31.6282	33.7381	40.6497	43.8302	46.483	29.6834	29.4431
RP1593	PA(10:0/8:0)	C21H41O8P	HMDB0114778	234.013	111.307	216.152	152.984	182.975	213.253	193.239	207.933	150.965	167.089	131.974	155.764	172.061	141.854	129.967	156.094	150.92	182.385	217.02	172.6	182.627	132.421	169.17	131.224	135.356	115.614	162.637	92.7609	142.372	135.911	137.766	108.844
TN698	PA(14:0/22:1(13Z))	C39H75O8P	HMDB0114789	74.5944	77.0837	61.9258	62.7574	64.5366	59.0635	62.1984	67.126	60.1786	61.2944	60.6753	56.5681	56.1351	57.4108	51.6993	57.8029	55.5855	55.6323	56.4067	57.9417	59.4639	57.1439	60.1665	54.5181	56.7937	55.6782	59.1729	57.4194	49.2064	54.5564	54.0121	52.1878
RP95	PA(14:1(9Z)/14:0)	C31H59O8P	HMDB0114795	70.7768	127.547	148.543	116.766	148.893	115.415	137.769	125.201	156.313	128.201	207.429	183.142	162.129	169.374	182.897	162.554	79.9581	85.1383	69.1963	86.9905	63.2298	73.5115	65.9889	59.9156	50.583	59.4026	45.9892	30.3547	28.9769	34.3587	23.9745	40.1616
TN505	PA(15:0/20:4(8Z,11Z,14Z,17Z))	C38H67O8P	HMDB0114822	1.37873	1.80706	1.47299	1.55566	2.09946	1.26701	1.08978	0.878437	0.733273	1.08442	0.564807	0.751695	0.868969	0.520256	0.583921	1.01191	179.818	185.035	1.34197	4.20022	7.42353	3.83875	1.06497	2.32882	165.884	212.67	162.493	183.658	110.734	170.2	145.299	26.0521
TN280	PA(16:0/14:1(9Z))	C33H63O8P	HMDB0114834	33.621	39.3824	33.3071	30.9202	33.6168	34.6662	32.6842	30.2362	32.3658	33.5166	33.1896	30.3588	33.0298	28.1124	30.1762	26.2464	25.2761	27.6467	24.7809	27.2339	25.5102	27.9015	28.1727	25.3213	28.483	27.2513	28.8672	24.9979	26.8111	29.0314	28.9009	27.8454
TN113	PA(16:1(9Z)/22:4(7Z,10Z,13Z,16Z))	C41H71O8P	HMDB0114867	321.723	321.358	272.115	268.136	267.997	275.511	279.804	281.7	266.283	276.398	269.686	277.271	267.498	270.382	271.359	259.66	250.736	254.79	259.175	255.216	257.898	251.068	243.717	242.42	240.055	246.154	253.893	245.399	235.819	239.001	247.433	238.593
RP54	PA(18:1(11Z)/16:1(9Z))	C37H69O8P	HMDB0114900	18.3029	49.1071	45.8811	72.7952	78.5087	78.4457	62.1842	50.7244	53.7515	71.7562	61.5865	85.5746	90.0682	92.9205	74.3271	62.5494	12.3807	17.8207	15.2091	13.7578	12.7054	10.3262	2.78757	12.0246	3.14655	11.3837	6.16259	5.22151	5.83091	1.2447	7.61492	2.95053
TN966	PA(18:3(6Z,9Z,12Z)/18:1(11Z))	C39H69O8P	HMDB0114979	9.76484	20.8098	10.533	12.0045	10.6439	11.6197	12.4173	11.4235	11.5826	8.32455	8.13002	9.60922	10.7918	10.5165	10.3642	11.9489	8.05426	10.2147	11.4936	11.0438	14.8497	10.517	11.3243	8.66579	3.12043	10.1947	8.37774	7.42773	9.17732	10.363	9.71311	7.50615
RP1910	PA(18:3(6Z,9Z,12Z)/20:3(5Z,8Z,11Z))	C41H69O8P	HMDB0114987	2.17827	2.78993	11.8082	7.52007	7.63423	12.5609	96.4571	47.5719	102.585	132.64	119.936	149.851	197.623	216.823	165.72	96.0189	217.2	185.846	187.083	194.032	157.448	118.335	78.6506	74.1823	130.724	76.9467	65.9562	77.4608	88.2932	108.834	78.6547	105.269
TN158	PA(18:3(9Z,12Z,15Z)/18:3(9Z,12Z,15Z))	C39H65O8P	HMDB0115010	103.756	103.897	101.624	98.8071	96.4499	89.9948	98.1497	96.7402	100.364	97.8063	101.186	97.6819	86.3577	98.6044	97.7015	97.6049	86.1226	94.3277	84.5048	85.4668	87.1697	87.9316	82.3866	76.3182	88.4404	88.8014	83.7246	86.1232	89.3019	91.4167	87.2252	78.3579
TN762	PA(18:4(6Z,9Z,12Z,15Z)/14:1(9Z))	C35H59O8P	HMDB0115028	12.5922	11.4626	10.2115	11.427	10.8314	10.2474	10.5524	11.8405	12.4551	9.5625	11.2052	10.0814	10.316	11.0992	10.2602	8.34067	8.81341	10.1457	8.51338	9.66615	8.10012	8.12976	10.4475	9.62283	8.52269	10.1839	10.0544	10.5907	9.96681	8.15437	7.6819	10.926
RP290	PA(20:1(11Z)/15:0)	C38H73O8P	HMDB0115093	56.2126	75.2985	64.4541	82.2332	61.4162	69.5917	74.2147	71.9709	75.0941	90.9117	66.1249	76.406	79.4473	76.489	68.172	90.7467	56.4814	58.2161	58.3164	66.6498	62.0688	48.2791	35.3134	51.8886	47.1275	59.0051	42.9274	47.8234	31.7588	30.5698	43.8267	52.2786
TN596	PA(20:3(5Z,8Z,11Z)/14:1(9Z))	C37H65O8P	HMDB0115119	67.9907	77.789	65.9363	72.9452	64.6059	68.0221	62.2821	65.3734	73.1626	66.7687	78.0154	63.7285	46.5427	66.3714	68.5776	68.0156	58.9761	65.1975	61.8946	62.094	63.1874	66.798	66.1842	58.7241	60.597	65.52	61.5003	61.5821	60.0698	66.8485	65.9924	58.8626
RP389	PA(20:4(5Z,8Z,11Z,14Z)/20:0)	C43H77O8P	HMDB0115156	0.206396	0.230296	0	0	0.746992	0.397876	0	0	0	0	0	0	0	0	0.513411	0.578133	268.854	262.237	209.012	367.196	221.682	199.522	209.332	266.65	267.403	203.094	231.014	185.366	164.649	157.615	208.148	251.263
RP2473	PA(20:4(5Z,8Z,11Z,14Z)e/2:0)	C25H43O7P	HMDB0011156	1139.73	842.008	1835.21	1030.62	828.609	846.127	1082.98	791.811	556.886	1159.14	465.643	579.257	576.295	724.919	623.372	652.796	968.598	961.638	1000.73	2281.64	2420.43	1537.68	1352.57	2049.37	858.536	865.785	893.394	524.269	609.319	1095.51	1395.78	1088.34
TN123	PA(22:1(13Z)/20:1(11Z))	C45H85O8P	HMDB0116706	147.218	144.692	124.733	125.039	123.999	120.241	121.844	115.998	120.474	126.814	124.129	127.409	121.629	118.907	123.955	124.29	114.084	114.513	104.849	116.499	116.346	107.777	113.689	105.321	105.588	112.385	115.113	112.882	108.618	105.4	104.27	105.097
RP750	PA(22:4(7Z,10Z,13Z,16Z)/22:4(7Z,10Z,13Z,16Z))	C47H77O8P	HMDB0115343	1.42874	3.17322	1.24487	3.19348	1.82819	1.11147	2.65735	2.25394	0.339103	1.3602	1.49615	2.89994	1.1903	2.80151	2.20621	2.97522	19.9554	34.698	39.7848	63.7347	81.8733	104.655	91.8794	90.8507	175.126	144.95	168.335	206.283	164.984	169.533	155.21	161.476
RP1009	PA(22:6(4Z,7Z,10Z,13Z,16Z,19Z)/18:1(9Z))	C43H71O8P	HMDB0115408	30.8737	9.32017	47.8716	41.6222	41.7014	65.396	60.7971	40.4685	56.4793	28.5491	22.7453	27.349	48.7767	20.4856	29.8319	41.1719	28.126	78.1398	82.262	86.5119	76.034	26.3567	53.3034	37.9565	34.4695	50.6855	46.3435	53.2008	60.8363	86.6877	172.163	201.532
TN835	PA(24:1(15Z)/20:2(11Z,14Z))	C47H87O8P	HMDB0115604	7.13655	8.45371	6.56499	4.96851	5.54657	6.16239	6.98208	5.24891	7.10483	6.86096	7.06626	7.03391	4.82525	5.38188	5.8115	6.34477	5.37523	6.19541	4.75427	6.03476	7.7731	6.91913	4.02819	4.85754	4.14259	5.11198	6.58722	4.74911	5.16989	4.85051	5.75772	5.37106
TN841	PA(8:0/10:0)	C21H41O8P	HMDB0115482	168.418	128.17	165.247	158.658	170.919	142.761	159.037	160.798	159.133	131.212	123.743	119.129	54.8092	115.194	75.7629	106.082	97.3637	102.936	105.867	126.936	115.23	109.76	115.868	114.232	129.61	111.962	138.848	86.5859	99.7617	91.223	89.168	92.4736
TN22	PA(8:0/12:0)	C23H45O8P	HMDB0115483	23.7816	13.7996	26.4614	22.0324	24.9693	24.7825	32.4657	25.2185	30.0885	28.1158	22.3718	25.2512	8.61207	16.8655	18.8924	21.2107	4.39317	5.20056	5.22275	7.31561	4.92228	4.82104	5.5079	5.21482	5.66779	4.6714	4.80017	3.67923	4.50486	4.98156	4.35268	5.89085
RP771	PA(8:0/13:0)	C24H47O8P	HMDB0115484	610.215	589.044	667.844	637.887	666.76	681.113	659.287	649.458	595.917	751.309	642.402	589.292	628.757	641.655	532.243	631.297	542.867	502.88	609.032	660.43	658.003	576.701	534.313	636.137	584.657	400.422	606.867	279.494	446.138	530.242	472.422	505.486
RP154	PA(8:0/14:0)	C25H49O8P	HMDB0115485	347.572	363.259	298.146	302.353	300.954	337.555	310.097	335.4	308.283	341.002	307.532	355.286	323.187	327.488	330.684	314.047	380.301	402.701	367.82	378.55	377.83	376.535	407.217	427.048	378.199	339.768	378.287	387.362	364.118	372.75	387.313	396.62
TN80	PA(8:0/16:0)	C27H53O8P	HMDB0115487	133.563	93.8138	149.839	146.817	142.227	144.694	141.912	146.163	151.065	137.306	110.799	118.101	31.082	94.3441	56.9258	56.3416	5.28252	4.11815	8.09739	8.61716	8.16802	7.19669	7.99734	4.09544	5.08773	4.79234	5.06331	3.64733	3.02013	3.31427	2.52663	2.37722
RP484	PA(8:0/a-15:0)	C26H51O8P	HMDB0115681	4.90454	179.751	119.851	180.977	201.36	198.727	202.458	231.591	210.136	223.107	192.559	198.416	166.138	203.597	138.277	187.392	61.7676	58.0797	59.707	48.4788	23.2913	63.2243	38.0728	30.7459	49.9085	32.6164	55.031	31.8324	31.0027	37.6895	49.6101	52.6323
TN2654	PA(8:0/i-13:0)	C24H47O8P	HMDB0115686	90.9312	262.481	94.7207	154.08	110.139	64.9325	105.715	65.7051	137.125	214.283	354.04	67.7189	54.7173	95.0439	66.5685	135.913	45.6112	30.8379	59.0654	99.2841	128.691	130.219	68.4752	85.3433	640.837	55.7128	23.4753	133.043	323.744	54.9329	21.3679	44.0152
TN119	PA(a-13:0/a-17:0)	C33H65O8P	HMDB0115700	102.591	106.596	93.4792	93.1128	92.3588	95.2211	92.1829	93.1419	98.3035	92.6532	97.579	90.8863	86.019	88.1496	85.5207	86.3907	77.9036	78.1996	80.3744	80.7509	88.4736	83.3688	82.7966	81.2595	81.4549	83.93	83.2435	81.0301	76.9384	81.2387	80.5502	79.476
TN309	PA(i-13:0/i-21:0)	C37H73O8P	HMDB0115808	33.1537	34.8715	25.3263	26.5846	27.5104	23.1698	26.0653	28.1226	26.7594	24.3177	28.1504	24.5554	23.2954	23.763	24.2418	23.474	20.8709	20.5624	21.0264	24.1362	20.8064	22.0193	21.752	22.2552	18.535	21.6733	20.7635	19.7153	19.6681	19.5433	21.8453	23.9155
TN289	PA(P-16:0e/18:2(9Z,12Z))	C37H69O7P	HMDB0011155	126.046	129.971	109.966	115.031	115.792	110.749	113.409	106.924	114.283	110.332	112.048	113.502	94.915	107.998	108.958	104.776	97.6147	99.306	99.4334	100.739	99.4606	105.221	97.0914	97.8416	99.3407	105.255	97.8494	101.558	96.0297	105.211	105.409	93.5213
RP827	Palmitic acid	C16H32O2	296-140-163	1145.72	239.441	1214.95	848.089	1117.06	1215.61	1364.8	1552.4	1493.75	1545.89	1347.22	1451.42	1355.27	1660.38	1495.2	1384.68	1852.5	2275.15	2255.58	2089.77	2425.04	2533.24	2612.43	1936.19	2535.61	2497.17	2620.23	2116.56	2814.07	1856.45	2247.85	2329
RP3097	Palmitoleic acid	C16H30O2	295-245-280	56.5418	5302.57	4160.28	4981.1	4100.41	3149.77	4570.57	5234.73	5015.91	1690.47	2042.59	1445.63	2841.69	1931.87	1592.84	1007.11	2411.37	5812.27	6659.39	4848.53	5895.64	5432.37	3012.29	7078.09	5269.54	2280.17	1011.18	2131.7	737.396	1199.81	1189.29	1520.58
TN634	PC(14:0/22:1(13Z))	C44H86NO8P	HMDB0007887	18.2805	25.5231	24.0157	32.7869	29.6347	28.791	24.002	22.373	25.3798	28.6644	30.4	36.21	27.4898	34.3613	16.249	11.5054	53.8429	63.7449	63.9045	59.8319	42.7987	37.3	49.2055	44.949	59.8991	45.1265	57.225	70.2559	56.1947	46.7459	38.4676	28.9143
TN1068	PC(14:0/P-16:0)	C38H76NO7P	HMDB0007895	23.1733	21.5044	26.1389	24.8085	23.9257	22.2263	24.1682	24.2034	20.9222	23.5393	18.8795	23.7186	24.1964	24.2806	22.8914	19.8422	20.6386	23.1661	21.7081	23.6167	21.6388	17.4242	22.4013	19.214	14.2266	21.8327	24.4842	18.2213	15.17	21.7178	20.5176	22.4509
RP675	PC(15:0/22:5(4Z,7Z,10Z,13Z,16Z))	C45H80NO8P	HMDB0007956	0.967105	0	0	0.300193	1.50521	0	0.66399	1.03458	0.890563	0.815353	2.20007	0.976508	3.85485	7.19544	1.28787	2.60335	35.2212	19.7491	20.5186	32.1514	69.6	92.5955	95.0597	120.875	76.5771	90.0792	57.5908	57.7	60.9615	79.8691	72.3546	94.846
RP34	PC(15:0/P-16:0)	C39H78NO7P	HMDB0007961	73.8526	15.3331	112.142	70.9796	68.9765	118.867	131.823	115.546	130.749	61.3689	46.0565	64.1901	130.445	59.2331	85.2219	103.794	290.492	256.109	315.731	357.328	355.64	261.733	250.533	286.276	316.991	262.037	288.986	207.383	243.908	239.82	225	218.378
RP318	PC(16:0/22:5(7Z,10Z,13Z,16Z,19Z))	C46H82NO8P	HMDB0007990	0	1.51234	2.78526	1.66026	1.56113	0.897161	0	2.40964	0.392197	3.21576	2.30859	4.07538	0.464358	3.412	3.43063	2.05412	153.543	128.682	88.4586	89.3591	112.645	165.858	175.712	142.889	202.882	104.818	74.4784	128.53	89.6768	89.1783	91.5388	124.217
RP415	PC(16:1(9Z)/22:2(13Z,16Z))	C46H86NO8P	HMDB0008020	2.32999	0.27702	0	1.67845	0	0.296126	0	0.514864	1.40974	0	0.520803	1.62967	0	1.80049	3.69125	2.27138	972.62	867.395	829.108	753.591	667.386	560.006	559.575	782.432	826.716	742.961	741.874	621.556	562.333	566.533	566.131	650.775
RP1847	PC(18:0/22:5(4Z,7Z,10Z,13Z,16Z))	C48H86NO8P	HMDB0008055	34.3792	33.3848	30.8353	25.8262	38.26	32.4108	28.8884	24.6088	30.0908	29.1822	32.7032	34.4464	31.3017	36.0089	32.6499	30.2388	23.9633	30.0126	26.4213	31.4287	32.763	28.4747	28.067	32.7991	23.7515	30.2106	27.149	32.0645	23.0989	26.0721	29.8105	23.3842
RP300	PC(18:1(9Z)/18:1(9Z))	C44H84NO8P	HMDB0000593	0.148264	0.265055	1.78695	0.689671	2.08578	0.56311	0	0	2.79605	0.332293	4.08712	4.5915	10.2732	1.21388	3.67519	6.77911	3639.7	2937.06	2243.62	2738.12	4147.83	5132.13	5988.86	6138.93	5352.84	4343.5	4162.78	3867.78	3886.05	4229.38	4348.72	4860.58
RP2558	PC(18:1(9Z)e/2:0)	C28H56NO7P	HMDB0011148	17.5341	946.735	435.076	1053.03	617.957	750.782	744.995	1106.09	1020.77	422.126	643.792	346.131	438.395	450.454	456.755	470.883	473.258	1147.45	1312.83	1514.87	2413.58	2000.38	1453.91	1921.18	1688.09	654.136	636.27	802.78	396.464	492.402	605.237	658.969
RP3442	PC(18:4(6Z,9Z,12Z,15Z)/20:5(5Z,8Z,11Z,14Z,17Z))	C46H74NO8P	HMDB0008248	79.6374	66.7816	67.2881	61.977	68.4611	65.3399	73.7434	77.3267	70.5599	75.6809	69.7722	73.0997	70.4825	75.2967	75.5983	70.8583	65.342	83.3285	78.9721	65.4131	73.938	75.9333	75.4588	83.3326	73.5387	61.1606	80.0066	52.6105	51.94	59.5472	67.5765	74.6686
RP653	PC(18:4(6Z,9Z,12Z,15Z)/P-18:1(9Z))	C44H78NO7P	HMDB0008261	13.9961	14.4435	12.9251	12.7941	14.2798	15.9372	16.123	13.3867	13.214	15.67	12.7154	12.5546	13.2327	14.655	13.2163	15.1387	18.3837	13.3726	18.5606	15.9466	18.7433	17.755	22.4358	20.237	25.9821	26.4339	29.0678	30.2127	25.7939	31.6944	31.6892	28.3353
TN598	PC(20:0/24:0)	C52H104NO8P	HMDB0008289	8.38232	9.7334	6.69817	12.7504	7.47955	10.0331	9.50445	9.72773	10.8548	8.08392	7.16378	13.4261	9.25421	6.81953	9.33936	7.68322	9.52684	7.23869	10.2107	8.35308	6.99915	5.58089	6.00123	9.3505	10.3814	7.15084	7.06145	8.08247	4.92081	7.63475	9.45767	4.16104
RP352	PC(20:1(11Z)/16:1(9Z))	C44H84NO8P	HMDB0008299	0	0	0.922626	1.97765	1.35552	0	0.755471	0	2.3786	0	3.61581	1.88727	4.5217	5.40439	7.64141	1.3374	7288.38	6077.05	5349.06	3709.11	6004.04	8824.14	10284.9	11658.9	10725.9	8270.35	8061	6630.24	7337.43	7308.29	7724.53	9270.13
TN686	PC(22:0/24:0)	C54H108NO8P	HMDB0008552	12.2487	8.17331	6.87431	7.59251	5.75572	9.56812	8.56432	7.64103	9.20573	6.22663	11.1373	11.2968	5.89	10.0996	7.39507	7.4948	9.38878	7.60187	6.45344	6.75715	6.36978	6.8622	5.70349	5.82552	7.69393	6.53076	9.78601	5.98125	8.56659	5.38861	5.89916	5.86779
TN2094	PC(22:0/24:1(15Z))	C54H106NO8P	HMDB0008553	13.6852	14.3189	7.00895	7.21873	11.1985	12.58	12.3766	11.7947	9.68042	4.12987	9.38059	10.3708	9.67484	8.93068	10.6877	11.0611	10.9392	11.7917	9.12499	6.32234	10.7069	7.705	15.1648	14.3889	9.69071	10.848	11.0384	11.7653	13.7756	6.45072	9.4537	9.62405
TN1975	PC(22:1(13Z)/24:1(15Z))	C54H104NO8P	HMDB0008585	16.3741	8.56906	5.65531	9.89162	8.34839	9.44587	8.39211	7.70324	8.08411	4.23748	5.71079	8.6234	11.072	5.89106	8.91354	8.60116	8.47028	9.46097	10.7241	6.93013	11.8601	4.20575	6.32809	5.91433	7.42736	13.5249	7.72774	8.91211	9.60926	9.23311	8.56585	7.09403
RP1797	PC(22:2(13Z,16Z)/24:1(15Z))	C54H102NO8P	HMDB0008618	20.0258	13.5362	10.7904	11.3951	18.7749	23.0906	17.5194	16.6673	17.9134	11.0944	14.3947	22.0429	23.339	15.3236	17.1468	18.4482	16.4233	34.8846	25.5943	15.5814	15.4999	7.99371	22.6802	23.8089	27.4968	27.3409	23.212	24.6921	21.584	22.4502	19.4462	17.2862
RP307	PC(22:4(7Z,10Z,13Z,16Z)/18:3(6Z,9Z,12Z))	C48H82NO8P	HMDB0008632	1.50666	3.00818	2.11427	3.61955	3.5597	1.80806	0.343462	1.63234	7.81562	1.837	2.23357	3.82758	10.8841	2.68999	1.71847	2.71348	3203.46	3011.89	2434.39	2521.79	2057.34	1724.61	2153.22	2622.49	2607.21	2036.51	2108.14	1766.84	1566.6	1473.3	1545.89	1652.08
RP220	PC(22:4(7Z,10Z,13Z,16Z)/P-18:0)	C48H88NO7P	HMDB0008653	10.1279	3.75579	4.81844	8.86093	9.05454	8.97932	9.69189	11.5947	17.7562	12.3541	17.7834	18.6544	16.0897	19.6799	35.7589	61.1041	53.3245	51.0722	62.1393	52.5072	54.7915	50.8143	52.7824	48.7378	60.2987	67.4615	64.7005	67.3246	34.9799	45.7403	48.7337	33.6246
RP1526	PC(22:6(4Z,7Z,10Z,13Z,16Z,19Z)/18:2(9Z,12Z))	C48H80NO8P	HMDB0008730	0	2.26277	0	1.46346	2.81522	0.731713	1.81952	8.74393	2.40731	4.288	8.77208	19.0853	26.5569	41.4664	56.6014	28.5051	3199.87	2508.75	3143.51	2622.94	2741.87	3365.74	3395.96	3415.92	3764.24	3235.65	3118.39	2956.23	2745.39	1645.61	747.468	1364.05
RP2432	PC(22:6(4Z,7Z,10Z,13Z,16Z,19Z)/22:6(4Z,7Z,10Z,13Z,16Z,19Z))	C52H80NO8P	HMDB0008748	1.14367	1.58432	0	0.497246	0	0.752784	0.501921	0	3.30715	2.14275	5.96663	240.39	358.609	640.999	861.212	665.156	590.489	198.128	536.655	460.434	449.339	593.48	360.5	42.0346	57.5978	243.968	257.938	317.676	351.696	267.23	208.239	421.228
TN674	PC(24:0/24:0)	C56H112NO8P	HMDB0008782	10.136	11.2703	8.26248	10.9197	11.4754	12.3489	11.3605	5.48731	11.9303	4.16033	9.72023	11.7764	5.45948	9.50574	6.38691	12.4082	7.46469	5.89072	9.43806	5.39423	7.04873	4.76379	5.50881	6.55836	4.6884	4.33744	9.40524	9.01359	6.29444	7.17233	9.81166	3.9114
TN1167	PC(24:0/24:1(15Z))	C56H110NO8P	HMDB0008783	4.25342	6.51773	3.94769	11.0097	7.04641	9.77821	7.14569	9.51379	11.4386	6.47688	8.05765	13.5704	7.09054	7.53991	10.1648	5.7402	11.6046	7.29018	8.4563	5.44512	6.82127	5.84348	7.96587	5.9006	3.93952	4.61453	6.58937	9.75784	5.2099	5.20988	7.13661	4.63885
RP828	PC(DiMe(11,3)/DiMe(13,5))	C52H93NO10P	HMDB0061392	553.514	172.249	655.705	426.122	438.826	612.733	491.506	501.82	240.973	224.131	120.942	209.689	267.561	185.98	170.242	236.414	254.528	281.782	305.727	372.85	331.473	124.89	183.35	211.741	92.3619	105.559	133.584	66.0131	87.9148	86.4785	113.983	65.3899
TN1219	PC(DiMe(11,5)/MonoMe(13,5))	C53H95NO10P	HMDB0061406	14.4008	17.8236	35.7071	9.31162	7.74687	25.5433	17.8205	10.9677	2.30984	12.1756	4.80603	5.24314	1.92651	10.1167	7.16125	11.8533	16.2171	10.2715	15.2804	14.7714	13.197	15.5603	14.5542	10.4315	6.73808	5.55144	12.0876	9.69724	7.338	9.50095	11.9461	9.84001
TN896	PC(DiMe(13,5)/MonoMe(13,5))	C55H99NO10P	HMDB0061415	8.94719	8.43752	3.9022	11.1717	8.07189	11.4792	7.38314	7.94709	8.28801	4.19971	8.62802	10.325	6.59337	6.99825	8.00471	9.03879	7.03903	7.82429	6.92874	6.23688	7.80398	6.30875	5.10066	7.89848	6.37459	4.94012	9.22712	8.15838	5.66429	9.20925	3.06818	3.77666
TN172	PC(DiMe(9,5)/DiMe(9,3))	C46H81NO10P	HMDB0061429	35.1001	34.5441	30.7669	32.3324	31.4926	29.6045	29.5059	28.4234	27.4684	29.6346	31.3577	26.6189	34.2784	31.6004	30.6291	31.3759	29.3352	31.0135	28.3339	28.6992	28.4975	26.4498	28.2415	24.7518	22.8894	26.6448	28.2302	26.1729	23.4798	26.8396	23.7962	23.6267
TN286	PC(o-16:1(9Z)/14:1(9Z))	C38H74NO7P	HMDB0013410	63.591	65.862	58.4145	55.4024	57.9888	52.7439	54.1907	52.5687	55.8696	51.7125	55.59	53.5208	58.299	53.4873	57.5705	48.769	50.0871	52.6066	51.0584	51.3251	48.6728	54.0882	48.6446	43.2364	41.9189	48.9353	44.8205	51.3093	46.4822	42.4602	47.4865	42.1372
RP527	PC(O-22:0/22:6(4Z,7Z,10Z,13Z,16Z,19Z))	C52H94NO7P	HMDB0013450	5.19691	2.45251	5.19922	5.55156	5.21795	2.69898	4.54804	6.45816	5.75735	5.92918	7.49704	5.84593	5.98137	5.83934	3.76895	6.30664	14.8613	15.4822	16.4875	21.4766	16.0141	14.3679	21.4245	14.3287	17.7653	23.5901	22.9348	12.6462	5.54793	8.36465	9.19275	9.11809
TN401	PE(14:0/14:1(9Z))	C33H64NO8P	HMDB0008822	20.2103	19.7575	21.0269	17.3651	15.3243	17.6926	17.4132	17.9846	18.5891	16.7259	18.2623	22.2422	22.5927	15.8999	17.4415	15.9787	13.6208	15.2437	10.8779	16.6501	14.0396	17.2907	13.3054	13.5912	8.06031	15.0529	15.4649	13.7466	15.9473	14.6879	14.2403	14.6303
TN462	PE(16:0/P-18:1(11Z))	C39H76NO7P	HMDB0008951	154.249	154.439	125.29	114.602	123.919	129.037	128.397	130.725	120.339	122.188	113.231	111.134	113.964	111.124	116.19	115.206	109.543	114.445	111.9	110.296	110.582	109.897	111.705	115.027	114.126	112.528	111.195	108.937	98.71	100.435	113.359	101.865
RP2728	PE(18:3(6Z,9Z,12Z)/18:4(6Z,9Z,12Z,15Z))	C41H68NO8P	HMDB0009129	13.1648	8.45067	46.5678	23.7457	34.1472	12.621	14.3251	25.9388	17.4871	27.4815	18.6038	30.5164	16.5434	14.6543	34.3571	48.0726	21.0015	17.9311	25.8126	17.1746	57.3698	26.7263	17.8658	16.6834	28.1564	20.8596	25.4537	11.5645	17.956	13.8025	24.4599	25.4732
TN524	PE(18:4(6Z,9Z,12Z,15Z)/14:0)	C37H66NO8P	HMDB0009184	1.45073	1.38408	1.7658	0.904201	1.13312	1.39937	0.915211	1.3261	1.4813	1.27081	1.2395	1.46898	1.3331	0.392228	1.18274	1.84282	73.1483	68.5415	1.21967	0.957557	2.66411	2.11978	0.999708	2.2663	99.1509	81.0621	60.0609	55.8232	37.7932	62.6056	60.5258	11.4666
TN2274	PE(18:4(6Z,9Z,12Z,15Z)/18:4(6Z,9Z,12Z,15Z))	C41H66NO8P	HMDB0009195	23.0737	27.5231	24.1896	20.2704	63.2253	22.8858	23.5164	20.1801	24.1796	23.2939	23.9075	23.6893	18.7803	21.3932	20.9521	21.1058	22.0292	23.1158	21.3603	22.0654	19.5292	18.184	23.8474	20.9733	58.9062	23.6181	21.9509	19.738	18.281	23.6148	23.5347	20.5883
RP228	PE(20:1(11Z)/16:0)	C41H80NO8P	HMDB0009253	5.45336	1.29288	4.12574	0.912041	3.23097	31.6716	2.16924	2.84235	1.40396	1.64167	0.692947	4.37367	4.83264	1.76788	3.72293	12.2264	165.507	211.564	111.666	208.235	139.477	152.728	112.793	123.766	59.448	105.513	155.529	100.403	191.557	207.377	329.257	403.228
TN386	PE(20:2(11Z,14Z)/20:1(11Z))	C45H84NO8P	HMDB0009296	19.7362	18.2885	13.7948	14.4707	15.1094	13.6583	16.6359	15.7937	16.1373	16.8372	16.5093	14.6915	15.3924	13.7175	13.8408	12.3636	13.7021	14.885	13.4036	14.5782	11.9328	12.7779	13.4816	12.2052	12.2179	13.001	16.5367	12.4023	11.6437	10.1155	13.2317	14.0097
RP1588	PE(20:4(8Z,11Z,14Z,17Z)/22:6(4Z,7Z,10Z,13Z,16Z,19Z))	C47H74NO8P	HMDB0009441	3.13822	4.52497	45.7159	58.3479	21.7382	119.29	140.13	175.844	186.68	190.814	159.657	153.529	22.7726	73.2282	37.0498	78.8607	202.884	199.196	159.94	81.4988	95.4583	160.835	137.096	151.224	181.428	101.933	146.97	113.174	106.086	102.096	125.653	144.446
TN150	PE(22:1(13Z)/P-18:1(11Z))	C45H86NO7P	HMDB0009545	207.288	211.222	179.494	178.151	176.175	177.641	175.709	176.076	174.847	176.662	189.61	176.386	166.838	168.12	170.805	172.556	161.647	160.727	152.458	164.564	166.17	158.314	152.521	151.505	152.619	160.968	166.202	159.639	160.787	166.632	153.619	157.612
RP3270	PE(22:6(4Z,7Z,10Z,13Z,16Z,19Z)/16:1(9Z))	C43H72NO8P	HMDB0009683	12.0523	17.3382	28.2145	25.6892	135.29	60.7609	208.111	209.516	456.44	438.126	400.552	397.544	312.041	127.938	373.07	268.148	285.92	274.969	311.315	193.206	103.377	123.579	142.957	182.097	79.9954	150.097	175.502	157.863	159.305	141.392	151.641	152.497
RP2061	PE(22:6(4Z,7Z,10Z,13Z,16Z,19Z)/22:6(4Z,7Z,10Z,13Z,16Z,19Z))	C49H74NO8P	HMDB0009705	178.437	23.0888	117.853	154.68	139.366	134.095	115.873	86.7684	57.6992	51.3634	6.20653	23.3485	15.4108	17.1043	12.1938	31.5052	25.7382	24.8782	17.1722	79.4598	63.3406	52.3235	74.4212	28.5518	39.8233	54.6507	41.5479	42.1724	57.5582	56.272	42.6897	33.0854
TN1619	PE(24:0/24:1(15Z))	C53H104NO8P	HMDB0009740	13.5135	15.0055	5.93208	12.3793	12.7037	13.3115	11.1682	8.79205	12.9588	6.17025	7.62852	12.7884	12.0451	11.2265	12.8755	11.7686	12.9979	9.88364	10.2094	12.1035	10.0762	9.03174	16.4654	8.84455	10.9811	7.43285	10.679	6.79114	10.4002	8.83098	7.597	13.4089
RP46	PE(24:1(15Z)/14:1(9Z))	C43H82NO8P	HMDB0009746	0	0.119476	0	0.445437	0.400383	0.381949	1.6199	0.57106	2.03427	1.03317	0.15218	0.181725	2.64353	0.187157	0	2.00073	108.773	90.4628	117.968	99.2533	100.999	90.5703	96.0092	126.09	136.059	133.11	117.879	136.658	121.713	121.657	111.187	137.933
TN721	PE(24:1(15Z)/24:1(15Z))	C53H102NO8P	HMDB0009773	11.0798	14.3382	10.7567	12.2762	12.926	15.2189	12.7052	13.1636	10.6464	7.43425	11.8806	11.3666	11.2568	12.4141	13.591	10.4624	13.2258	10.2245	10.2228	8.95689	12.3318	7.15688	9.90551	9.22734	10.8362	10.3979	9.91096	7.86434	12.1429	6.03356	9.45283	7.72133
RP667	PE(P-16:0/14:1(9Z))	C35H68NO7P	HMDB0011336	3.03946	54.7925	22.0356	72.0578	57.6812	64.338	70.8271	79.3454	78.471	78.4861	88.268	67.9051	68.932	80.7123	59.3315	56.4581	19.4176	18.5535	21.4728	9.44754	13.6402	20.4834	11.7971	17.7261	16.7455	12.5112	10.5381	12.434	11.7853	13.0678	18.9199	18.5691
TN1729	PE(P-16:0e/0:0)	C21H44NO6P	HMDB0011152	103.148	42.5085	92.1511	89.7441	96.4249	127.503	86.1656	84.895	59.2098	47.6503	32.4661	48.9203	18.0527	38.7765	28.0608	40.3503	51.1499	69.5276	97.4643	73.8734	66.7238	52.089	57.6926	64.4519	61.1444	41.1435	64.1	29.0737	51.0398	48.9263	41.4457	43.5685
RP1468	PE-NMe(14:0/14:1(9Z))	C34H66NO8P	HMDB0112937	40.8402	45.3599	42.7077	41.0636	46.1607	40.229	33.7466	47.4202	47.4862	43.738	45.7971	43.9813	44.7219	42.8714	46.6262	41.5123	46.0426	50.1321	46.9661	46.0329	54.3473	46.2263	45.2459	42.8242	48.4691	42.5486	52.0113	51.4447	52.6312	42.7663	44.3679	45.491
RP818	PE-NMe(14:0/20:1(11Z))	C40H78NO8P	HMDB0112958	1.15421	0	0	0	0	0	0	0	0	0	0	0	0	1.38581	0	0	9.99922	13.7998	197.505	638.364	1311.24	1695.08	1623.33	1752.31	1288.81	1011.78	1157.26	1306.88	1526.03	1529.27	1457.12	1583.39
RP225	PE-NMe(15:0/20:1(11Z))	C41H80NO8P	HMDB0112963	3.61979	1.70806	4.24161	4.07519	0	1.04941	0.97028	1.41459	2.76077	3.71036	4.93735	3.50565	2.43362	5.51462	2.67758	3.26252	288.404	287.163	331.688	372.862	282.773	234.31	219.405	229.594	174.404	199.947	198.56	233.054	236.697	260.358	323.032	585.815
RP873	PE-NMe(15:0/22:4(7Z,10Z,13Z,16Z))	C43H78NO8P	HMDB0113034	0	0.662207	0	1.45209	0.925393	0	0	1.74021	2.05248	0.610055	0.196326	2.40655	0	0.451674	0	1.26518	65.0836	122.632	379.027	515.985	535.002	534.994	514.798	435.481	340.329	491.511	920.624	1152.12	1442.31	1551.5	1504.2	1452.7
RP2758	PE-NMe(15:0/22:6(4Z,7Z,10Z,13Z,16Z,19Z))	C43H74NO8P	HMDB0113036	1.67627	3.87489	10.1079	14.7667	16.7304	20.5063	13.8045	28.1314	34.4818	46.6806	22.0928	51.626	61.3254	69.0899	100.395	342.58	230.418	264.584	261.738	280.437	264.161	225.492	194.035	197.531	183.475	166.976	137.49	137.676	91.9005	96.9666	135.043	43.9568
RP124	PE-NMe(16:0/22:5(4Z,7Z,10Z,13Z,16Z))	C44H78NO8P	HMDB0113056	16.9234	7.34447	8.95018	1.06359	12.0391	3.3596	10.9999	11.7036	5.10529	14.0166	15.7514	21.7265	22.8077	23.423	22.9633	65.2563	1169.76	1065.68	1381	1682.09	1555.21	1447.63	1657.42	1984.31	2918.88	2761.9	2832.22	2159.13	2151.02	2067.16	1857.45	1650.35
RP425	PE-NMe(16:1(9Z)/18:1(11Z))	C40H76NO8P	HMDB0112957	1.46084	1.13326	0	1.61191	2.56654	0.476245	2.5383	1.95963	0	0.658875	1.6233	1.83897	4.41449	3.3634	2.24063	1.79383	163.783	155.451	216.035	222.063	175.967	207.877	256.483	282.958	266.552	234.844	258.578	183.772	162.799	166.306	134.075	97.3693
RP446	PE-NMe(18:0/22:5(4Z,7Z,10Z,13Z,16Z))	C46H82NO8P	HMDB0113105	0	4.37593	1.74957	0.396616	0	0	0	0.91614	0	2.5083	2.49811	0.418261	7.35961	4.63577	2.83022	10.9467	2050.29	2093.48	1720.82	1849.68	1924.63	2707.68	2630.96	2515.51	2889.56	2251.48	1888.22	1981.7	1303.63	936.609	899.32	1345.69
RP2550	PE-NMe(18:1(11Z)/22:6(4Z,7Z,10Z,13Z,16Z,19Z))	C46H78NO8P	HMDB0113134	1.33562	0	7.83733	3.30925	7.49122	0.489704	6.45627	5.61002	4.9934	5.02215	4.93407	7.71706	17.1273	60.4857	131.234	241.433	163.379	181.469	259.372	279.317	178.966	239.543	223.343	190.458	175.644	113.187	92.1491	78.5477	50.647	81.1899	93.7718	100.084
RP558	PE-NMe(18:1(9Z)/22:6(4Z,7Z,10Z,13Z,16Z,19Z))	C46H78NO8P	HMDB0113161	2.71979	1.74349	1.84306	3.62591	1.56914	1.81242	0.839895	0.78046	2.62849	3.44524	1.36896	0	9.78078	48.4104	96.3123	254.961	888.517	1486.72	4278.09	6780.45	5864.38	6762.59	5601.87	4588.68	3725.49	3008.87	2810.05	3206.89	2330.64	2516.55	2860.62	2947.01
RP183	PE-NMe(18:2(9Z,12Z)/18:1(11Z))	C42H78NO8P	HMDB0113170	0	0	0	0.382046	0	0.640813	0.476282	0.850863	2.6866	2.88924	0.395594	1.19888	0	1.15563	5.14006	3.06551	5042.92	3565.61	3680.48	3783.89	3356.11	3419.51	2854.84	2669.18	2900.55	3290.84	3878.95	3467.5	3348.79	3482.81	3652.47	3904.12
TN611	PE-NMe(18:4(6Z,9Z,12Z,15Z)/14:0)	C38H68NO8P	HMDB0113250	19.6197	18.293	14.8895	13.3429	18.6446	15.9777	16.0942	16.6588	14.6145	14.6994	16.0535	14.6349	14.5563	16.6007	17.2196	16.091	14.5156	14.9128	13.3272	11.7814	13.4013	12.984	12.3339	15.827	13.4654	15.954	15.1715	12.4334	12.58	11.2848	14.8874	15.3162
RP466	PE-NMe(20:3(5Z,8Z,11Z)/22:6(4Z,7Z,10Z,13Z,16Z,19Z))	C48H78NO8P	HMDB0116727	2.23155	3.92646	3.93144	2.86717	1.37697	5.63356	11.57	8.63963	5.48862	17.2665	27.439	42.9516	66.8572	77.4297	90.6984	108.49	7171.66	7121.41	4892.65	4298.25	4098.27	5015.54	4418.47	4168.49	4787.81	3643.81	2907.79	3148.48	2153.22	2071.02	2409.54	2611.9
RP292	PE-NMe(20:3(8Z,11Z,14Z)/20:3(5Z,8Z,11Z))	C46H80NO8P	HMDB0113409	2.58302	1.01528	0.799413	0.986685	3.14068	2.26528	4.0262	11.8659	4.52876	3.74846	1.44332	3.32807	5.63741	61.6504	101.772	176.238	45328.8	37781.3	32953.1	21164.4	26610.4	32355.6	32027.6	33891.7	33604.9	27635.6	27136.8	24516.4	25680.3	23735.4	23829	27083.9
RP546	PE-NMe(22:4(7Z,10Z,13Z,16Z)/16:0)	C44H80NO8P	HMDB0113595	0	0.806393	0	0	0.296638	0.601764	0.935899	1.65304	0.899806	3.11429	1.18204	0	1.9152	3.11801	6.38611	4.17702	3111.75	4537.34	18107.4	29120.8	34162.4	37140	35103.9	32327.1	24009.4	18670.4	22258.3	21714.8	23963.2	24283.2	24139.5	26124.2
RP1156	PE-NMe(22:5(4Z,7Z,10Z,13Z,16Z)/20:3(5Z,8Z,11Z))	C48H80NO8P	HMDB0113634	0.11122	1.76073	0.309437	1.99807	1.97784	1.94941	2.28425	0.941089	5.34491	4.3065	0.971084	7.93956	14.205	11.3751	5.68504	25.0741	1613.95	1510.19	1631.22	1847.78	1997.33	1995.09	2259.91	2411.83	2367.04	1959.59	2127.55	1694.91	1403.58	565.563	491.238	1165.48
RP2368	PE-NMe(22:5(4Z,7Z,10Z,13Z,16Z)/22:5(7Z,10Z,13Z,16Z,19Z))	C50H80NO8P	HMDB0113642	1.33358	0.418256	5.19705	0	2.60537	2.30682	6.04052	0.41631	0.858555	2.68354	2.39318	1.73087	4.08859	3.19946	110.276	453.21	101.077	130.214	116.218	146.398	129.448	133.603	110.511	110.697	91.62	22.8465	16.5154	23.2169	46.3818	46.2846	71.7215	53.0062
TN129	PE-NMe2(14:1(9Z)/18:0)	C39H76NO8P	HMDB0113853	25.0362	27.0053	24.1268	24.2024	26.3942	26.3619	24.1361	21.9582	20.8661	24.2317	22.168	17.7587	19.4309	20.6221	23.2401	22.5968	23.9983	19.2042	20.0377	18.5431	17.4332	17.852	17.6438	16.3042	17.6598	18.64	16.9732	21.3676	15.328	16.351	18.8975	18.8686
RP411	PE-NMe2(14:1(9Z)/22:2(13Z,16Z))	C43H80NO8P	HMDB0113911	1.90431	0.872531	1.60074	3.27943	2.53726	2.13976	2.06037	3.6505	3.63684	0.155853	3.75385	4.221	5.42516	7.19404	5.11651	17.7348	109.87	191.253	157.472	180.509	197.865	353.147	427.846	602.572	622.599	589.596	589.907	499.91	502.209	393.496	308.269	363.69
RP489	PE-NMe2(16:0/22:6(4Z,7Z,10Z,13Z,16Z,19Z))	C45H78NO8P	HMDB0113959	0	3.09565	0	0	3.9378	2.17207	2.09889	0.384594	0.903908	0.745483	1.10461	0.189336	2.29604	7.22035	5.12573	1.85459	795.025	682.793	519.729	784.015	1405.16	1787.8	2184.69	2244.85	1949.21	1532.45	1449.49	1292.3	1440.96	1514.89	1609.15	1778.8
RP91	PE-NMe2(16:1(9Z)/16:1(9Z))	C39H74NO8P	HMDB0113849	1.25818	1.56063	0.35658	0	0.123183	0	0.464294	0	0.485629	6.21276	3.38055	6.95898	5.99965	7.95174	4.09389	2.94996	176.637	286.655	394.957	376.788	353.675	352.18	358.276	321.721	299.088	293.573	258.029	252.513	254.479	308.239	317.145	300.565
RP295	PE-NMe2(16:1(9Z)/18:1(11Z))	C41H78NO8P	HMDB0113858	0.727164	1.27518	3.69151	1.51344	4.69909	7.17056	3.03422	6.65745	4.60458	2.26017	3.68016	2.98758	4.26736	4.20607	3.40668	2.62497	211.312	137.58	126.948	241.742	225.914	188.26	169.254	193.861	207.524	122.057	123.658	121.689	119.041	78.4484	130.496	131.592
RP1826	PE-NMe2(18:4(6Z,9Z,12Z,15Z)/20:4(8Z,11Z,14Z,17Z))	C45H74NO8P	HMDB0114170	2.87333	4.73131	7.43526	6.61243	10.1661	31.339	281.89	88.4016	360.309	330.733	321.098	353.392	497.896	666.941	631.466	106.42	374.356	410.086	353.708	305.766	357.933	335.28	94.3004	136.133	262.388	274.224	270.289	264.905	226.124	221.388	231.149	243.814
RP179	PE-NMe2(20:0/14:0)	C41H82NO8P	HMDB0114181	5.07912	0.776684	2.78934	0.510293	1.32742	22.0854	1.22741	3.90451	3.39071	1.24193	2.28345	4.57092	0.840128	5.24194	4.47135	6.40686	123.667	131.475	141.835	154.169	127.127	100.48	121.471	135.707	123.22	121.612	129.141	110.597	95.0734	95.9066	123.77	128.207
RP409	PE-NMe2(20:3(8Z,11Z,14Z)/20:4(8Z,11Z,14Z,17Z))	C47H80NO8P	HMDB0114314	0.869997	0.762706	0.543188	0.741303	0.248749	3.61929	2.0557	0	0.425575	1.22313	1.79797	1.0022	2.85976	0	0.709225	1.14057	105.475	119.533	80.8283	96.1049	52.0904	48.4824	90.9741	123.3	108.694	96.5498	84.832	70.0264	68.8232	83.4554	80.8951	68.7767
RP2773	PE-NMe2(22:4(7Z,10Z,13Z,16Z)/14:1(9Z))	C43H76NO8P	HMDB0114496	3.20597	9.3718	13.8622	10.0299	9.60501	97.1897	126.875	129.475	285.325	309.864	315.345	356.718	253.926	237.261	121.033	167.049	169.569	176.509	193.061	184.906	172.426	122.042	109.354	180.745	151.253	162.466	198.755	160.679	174.7	190.1	182.69	156.158
TN554	PE-NMe2(22:4(7Z,10Z,13Z,16Z)/20:5(5Z,8Z,11Z,14Z,17Z))	C49H80NO8P	HMDB0114514	33.5721	27.0473	34.7998	30.2333	32.0181	35.048	32.0197	32.3049	32.974	33.6841	36.2428	30.1684	34.0252	28.6158	32.9508	32.4303	33.6759	31.5655	30.2291	28.2245	30.6305	30.6018	27.6135	28.2218	25.4119	27.9531	30.5895	25.6764	26.8093	29.6311	25.6024	29.277
TN741	PE-NMe2(22:4(7Z,10Z,13Z,16Z)/22:6(4Z,7Z,10Z,13Z,16Z,19Z))	C51H82NO8P	HMDB0116716	8.5264	6.26353	7.33251	5.33818	7.71873	6.70986	6.15848	9.79614	6.55079	7.56735	7.56449	6.58995	11.0292	7.57627	7.07548	7.79698	7.06766	7.6552	6.05812	6.69543	6.66863	4.94532	8.01761	5.67884	5.11178	5.16018	7.77281	6.70379	4.90975	6.16242	6.8531	5.60979
RP2181	PE-NMe2(22:5(4Z,7Z,10Z,13Z,16Z)/14:1(9Z))	C43H74NO8P	HMDB0114524	1.58582	9.69215	6.28835	16.9505	22.4726	25.4692	38.7768	44.2469	49.0916	130.108	66.1537	212.264	179.469	273.806	235.262	2107.75	2129.51	1947.47	2021.86	1938.19	2151.55	1668.48	1870.47	1526.96	1345.51	1384.1	1159.87	988.309	1024.34	1397.42	1143.01	295.968
RP500	PE-NMe2(22:6(4Z,7Z,10Z,13Z,16Z,19Z)/20:5(5Z,8Z,11Z,14Z,17Z))	C49H76NO8P	HMDB0114594	1.79677	2.64082	8.78655	1.59481	0.861699	4.61327	2.10889	4.1394	4.43934	5.81723	7.9243	5.97067	12.4457	8.2989	13.3194	10.5937	65.721	122.245	340.067	502.81	446.484	524.99	409.393	400.149	294.629	250.309	245.602	281.797	231.597	250.661	257.858	216.544
RP2415	PE-NMe2(24:0/24:1(15Z))	C55H108NO8P	HMDB0114630	19.0845	10.3141	12.3559	16.5402	20.5113	14.2477	13.5471	8.07237	16.5116	11.4779	14.0728	17.9668	19.4988	12.6664	17.0029	11.915	14.0527	15.801	14.0989	14.5548	16.8983	7.58218	10.8799	12.4457	19.4769	22.8625	34.2698	21.9414	19.4801	9.64485	17.9031	12.1089
TN2771	PE-NMe2(24:1(15Z)/24:1(15Z))	C55H106NO8P	HMDB0114659	10.9601	13.7802	10.9066	9.50811	8.66849	13.8548	6.85086	8.79999	10.0349	7.81076	7.14812	13.7388	5.69385	6.13841	13.8116	8.33106	9.68737	9.8713	10.3981	7.2181	9.56548	5.54225	12.6098	7.89384	8.61007	10.0816	14.4229	11.3382	11.2328	7.46764	11.7558	8.71096
TN1637	Pentadecanoylglycine	C17H33NO3	HMDB0013300	24.1573	20.0618	29.5654	22.8185	20.7257	21.9184	29.6747	19.6105	18.3889	16.3131	16.7173	21.5117	6.78678	16.3015	13.3754	17.1048	21.9669	20.908	21.708	19.4652	18.9716	14.4218	21.2337	17.0023	22.4756	15.3531	23.6239	11.2124	11.0729	16.1439	13.9813	13.6043
TN1053	PG(16:0/18:3(6Z,9Z,12Z))	C40H73O10P	HMDB0010576	17.6756	17.4799	19.9774	20.3848	18.0846	16.8266	16.1315	16.1709	16.8062	17.619	14.7054	15.7918	18.1739	17.8232	15.3866	17.1445	15.0855	15.7069	16.4793	17.88	13.4508	15.46	18.1222	16.2813	16.4499	19.2905	14.4794	15.9935	12.0833	17.4997	16.3214	13.555
TN1102	PG(16:1(9Z)/16:1(9Z))	C38H71O10P	HMDB0010586	8.45673	11.0275	8.33395	10.7582	9.99893	11.2375	7.44734	10.4344	9.2778	12.1816	9.06453	10.3457	7.41289	11.2582	8.57532	7.47917	7.39211	7.47117	8.13068	5.8417	8.91908	8.36496	7.64615	6.22362	13.417	8.57742	8.38482	7.41566	7.76101	7.40891	6.96952	8.81218
TN118	PG(16:1(9Z)/18:2(9Z,12Z))	C40H73O10P	HMDB0010590	314.038	317.31	283.692	284.569	285.061	268.167	276.259	270.911	283.949	286.895	281.527	269.027	253.687	285.087	269.685	263.125	246.405	244.388	239.495	261.819	247.785	248.627	243.141	235.859	249.058	252.511	252.353	262.322	253.176	256.27	231.205	247.08
TN121	PG(16:1(9Z)/18:3(9Z,12Z,15Z))	C40H71O10P	HMDB0010592	172.685	169.478	157.062	161.157	156.331	149.403	153.069	156.051	148.382	153.705	144.638	148.036	148.552	144.333	136.375	141.126	132.813	137.673	134.958	136.835	138.926	136.955	136.898	126.299	123.548	132.85	137.97	131.165	128.377	131.836	125.785	127.491
RP2565	PG(18:0/20:3(5Z,8Z,11Z))	C44H81O10P	HMDB0010608	3.86918	14.643	1.48105	16.4522	5.23367	2.92515	12.8996	5.99583	45.9499	4.16725	74.8363	7.78932	24.6315	19.0841	11.4627	45.4886	7.14085	3.67272	18.8588	12.378	19.63	15.238	18.8997	5.70406	224.177	6.98701	8.66953	68.2859	87.7303	14.3872	4.41966	6.75182
TN134	PG(18:3(9Z,12Z,15Z)/16:1(9Z))	C40H71O10P	HMDB0010676	39.4486	38.5056	36.2517	33.6024	38.1544	35.1404	34.6431	36.9806	34.7906	34.6761	34.3861	33.6978	35.6613	34.7286	30.167	34.2101	32.5092	33.443	31.617	32.4613	31.6989	31.9523	30.9888	31.9645	29.3333	31.409	31.0076	33.1482	26.5956	28.5445	30.6408	27.3909
RP333	PG(20:4(5Z,8Z,11Z,14Z)/22:5(4Z,7Z,10Z,13Z,16Z))	C48H77O10P	HMDB0116611	1.2603	0	0.870036	2.50695	0.862743	3.00091	0	3.53101	9.82103	4.61971	2.22149	5.8734	5.27634	5.3692	5.297	7.78679	300.421	311.76	225.645	204.062	210.012	214.272	208.646	207.627	236.767	179.175	163.452	164.79	127.963	116.122	131.432	143.208
TN1105	PG(22:6(4Z,7Z,10Z,13Z,16Z,19Z)/20:3(5Z,8Z,11Z))	C48H77O10P	HMDB0116602	13.4848	11.8112	5.95714	9.22696	8.45495	8.25992	8.25851	9.37451	8.13962	8.21876	10.9328	9.67292	10.4606	8.90616	9.48704	7.98623	9.62531	7.59352	7.60326	10.732	10.252	9.00363	7.19232	6.70258	7.89657	8.44892	8.90942	7.00858	6.2558	7.62937	7.69208	6.78625
TN240	PG(a-13:0/i-12:0)	C31H61O10P	HMDB0116642	15.7944	19.0046	15.4959	13.3768	13.3848	12.4181	15.7322	13.5418	13.0988	11.9367	15.1115	14.3638	10.6584	12.5817	13.9985	15.2586	12.9142	11.0068	11.209	11.3129	11.8983	11.922	10.4349	10.7558	12.5015	11.7922	10.9564	13.2491	12.6335	11.7642	11.5085	10.8624
TN517	PG(a-13:0/i-14:0)	C33H65O10P	HMDB0116644	27.2734	28.5832	24.6397	23.1625	24.4892	23.6325	25.0356	25.9055	23.7651	23.8598	22.3803	24.4964	27.2171	25.4316	23.8456	22.5749	22.035	23.8157	21.3749	20.6902	21.6756	22.486	22.5291	22.5653	21.2978	21.3032	21.681	22.3734	18.6836	19.0142	19.7732	21.7151
TN2310	PG(a-13:0/i-24:0)	C43H85O10P	HMDB0116653	16.8727	67.5053	8.83496	66.4276	21.9457	16.7909	33.3992	13.4245	131.853	24.6051	281.659	30.4542	5.34862	93.102	41.2533	172.715	35.6184	7.76641	49.0225	48.277	65.0568	31.6779	42.3116	17.48	607.773	21.6657	24.2797	195.631	271.21	45.2475	3.82572	16.0506
RP1054	PG(i-13:0/i-19:0)	C38H75O10P	HMDB0116685	49.1367	48.6753	47.0785	43.2936	39.419	46.3719	50.3414	44.9454	54.9039	53.3652	47.6307	53.6707	49.8128	45.9996	44.9718	62.4238	56.3143	45.0725	45.8034	59.3848	60.2446	53.7907	60.6712	61.8687	59.2696	54.9299	58.1594	61.111	54.7112	56.5282	60.1065	57.1146
RP766	PGF2a ethanolamide	C22H39NO5	HMDB0013628	309.637	165.2	91.7047	125.759	184.866	130.707	103.637	134.399	105.089	102.833	105.221	95.1538	99.9978	94.8058	108.65	89.2782	48.9853	66.5082	87.8153	85.8677	100.081	73.8896	55.5688	67.6516	100.886	62.2889	38.2295	48.5767	92.2001	47.2469	57.9223	51.4064
TN606	PGP(20:2(11Z,14Z)/18:2(9Z,12Z))	C44H80O13P2	HMDB0116452	13.8393	9.24806	21.8131	23.0836	9.44387	4.45474	14.4807	11.4076	19.4643	76.1855	53.5638	12.4334	1.85722	33.8206	55.4029	42.0014	42.8916	54.5971	15.3914	56.3905	113.896	100.627	143.212	89.1025	84.7343	166.548	59.8148	46.5875	8.23775	175.952	168.35	134.71
TN528	PGP(i-14:0/a-13:0)	C33H66O13P2	HMDB0116566	21.2764	23.0864	21.5746	23.8701	21.4575	23.1718	24.2368	22.2551	23.4015	24.3081	24.0318	22.6686	19.8348	20.5333	21.0619	24.8832	20.9171	23.1141	22.4083	20.3383	23.9665	18.6933	21.8458	18.9553	22.3108	21.8725	21.9321	22.0203	21.6611	21.2973	19.7457	21.2872
TN709	PGP(i-14:0/i-13:0)	C33H66O13P2	HMDB0116570	24.7855	7.14593	14.0321	14.6017	16.4427	15.1562	8.24543	12.7758	7.93677	5.5462	12.6375	11.3132	0.899604	4.91154	7.77544	6.46026	19.3285	18.178	24.4856	21.7357	19.8443	10.2491	21.6662	14.9331	14.5164	20.803	14.8648	8.46938	28.2576	19.9115	15.1477	17.4184
TN2337	PI(16:0/18:1(9Z))	C43H81O13P	HMDB0009783	36.251	123.138	13.5955	95.1161	35.0215	23.6679	57.4297	23.2593	188.69	43.2498	334.755	41.6024	12.2719	119.286	52.3446	230.178	56.8684	14.2242	79.7721	69.4363	83.5992	61.0868	69.9955	27.7573	704.143	30.9383	36.462	252.305	341.043	64.6376	9.1944	24.0691
TN156	PI(16:0/20:0)	C45H87O13P	HMDB0009785	100.849	99.7297	85.5633	86.4467	86.4747	81.6572	83.6851	84.9894	79.3406	80.33	81.9685	74.7843	87.9428	81.8189	78.369	79.7036	80.0683	74.5495	72.6833	78.7545	73.4121	73.7533	70.3531	69.6039	64.2246	72.0455	73.5041	75.9304	68.4229	70.0088	68.474	61.8221
TN160	PI(16:0/20:2(11Z,14Z))	C45H83O13P	HMDB0009786	1.52915	2.0759	3.65521	15.9728	33.8395	52.0493	65.9977	78.1997	97.3376	135.652	162.727	196.813	209.947	242.97	247.75	253.392	37.7093	38.7853	34.7859	30.7424	27.0289	19.7061	22.5363	17.6633	18.865	17.7012	16.4558	15.5734	11.6299	13.1821	9.77097	10.8822
TN658	PI(18:0/16:0)	C43H83O13P	HMDB0009805	21.5265	19.3122	19.913	15.4096	15.5914	14.9448	16.3533	14.9833	14.3873	17.715	18.3964	14.1307	17.0397	13.8328	14.471	16.7347	16.4804	15.1708	13.6062	14.4603	13.1671	11.4818	13.655	16.4698	13.1	14.9315	15.0862	14.1511	11.9014	12.1385	14.8913	11.5738
TN2112	Prostaglandin D2	C20H32O5	236-609-653	116.216	115.417	53.3754	88.5191	75.9805	95.3384	52.7749	69.9532	39.4675	33.1339	30.2317	83.0541	10.2563	60.0665	24.3272	41.43	60.9532	69.3628	51.694	46.18	65.2848	54.7211	56.5172	58.4962	59.5505	46.6913	33.4186	34.8849	96.3203	45.7118	38.7345	33.1941
TN607	PS(14:0/14:0)	C34H66NO10P	HMDB0012330	15.7759	15.051	10.5612	14.3689	12.3513	9.89602	12.5603	13.0703	13.8665	13.5718	11.3926	13.2407	10.4628	9.96022	12.433	9.63923	10.0216	10.0871	12.4189	10.4304	10.8493	12.4629	9.51304	10.5821	12.3941	10.2389	10.6527	12.489	10.2903	9.68395	9.15693	8.78996
TN246	PS(14:0/18:2(9Z,12Z))	C38H70NO10P	HMDB0012336	29.244	30.4262	23.3594	24.4566	25.5143	26.95	23.8913	26.5476	24.939	26.2347	24.7324	23.7237	23.6916	24.5975	23.6474	24.2498	22.9025	21.8135	21.6894	20.9257	21.9408	21.5167	21.3751	21.0039	21.9038	20.4789	23.5096	18.9277	16.979	18.7498	17.6541	21.5936
TN1437	PS(14:1(9Z)/14:0)	C34H64NO10P	HMDB0012341	28.4731	31.5304	24.5999	26.8772	24.1995	23.4029	24.2363	27.4044	24.8501	24.398	22.0737	22.3076	19.7524	21.8539	18.8949	19.323	25.9387	19.828	21.3902	21.4212	19.6378	20.9963	23.4808	21.5617	20.34	20.247	26.9015	20.5473	21.1804	17.4349	20.2156	18.5486
TN455	PS(14:1(9Z)/14:1(9Z))	C34H62NO10P	HMDB0012342	429.821	453.676	373.148	382.759	363.895	362.049	350.326	364.644	366.871	360.572	358.486	332.973	317.291	328.946	325.781	324.874	275.112	301.996	299.494	321.238	321.855	336.09	329.045	317.583	324.446	327.695	319.972	323.206	313.104	317.796	320.16	293.185
TN292	PS(16:0/24:1(15Z))	C46H88NO10P	HMDB0112356	44.2014	42.2355	36.0592	33.8772	34.2866	36.1845	36.7665	32.4652	33.9628	33.0038	33.3948	32.307	39.112	31.6367	34.9311	35.198	35.0301	32.9369	31.709	33.125	30.5382	33.8698	31.0066	28.8017	27.2618	29.5748	28.6901	29.8462	31.7765	28.5875	30.7473	29.1564
RP999	PS(18:0/18:0)	C42H82NO10P	HMDB0012378	0.445912	0.708816	2.1472	1.32223	2.85704	1.09115	9.63027	9.68672	2.92446	7.81644	2.00141	5.65278	8.26061	13.9312	13.2379	26.1569	23.0151	38.6158	39.1503	46.3052	24.5269	39.0036	38.4178	82.799	239.723	335.851	381.575	326.002	365.213	356.292	291.298	255.375
TN131	PS(18:1(11Z)/16:1(9Z))	C40H74NO10P	HMDB0112271	138.157	143.256	123.2	117.562	116.152	126.324	121.621	131.096	117.607	122.15	116.472	119.202	119.144	118.622	117.09	112.268	108.209	111.758	114.456	110.765	112.748	107.949	111.329	109.147	104.436	106.797	110.234	107.799	101.92	104.209	107.802	106.122
RP2261	PS(18:2(9Z,12Z)/15:0)	C39H72NO10P	HMDB0112425	53.1975	54.719	40.9931	41.0783	65.9083	54.7561	45.2172	61.8637	50.2501	45.6516	51.9849	79.2811	45.9565	77.605	45.8192	46.4591	47.6907	55.2024	47.8332	44.8389	46.5736	53.348	47.5744	47.705	44.3648	49.6617	51.7749	51.0976	44.6531	40.2303	51.4333	37.9495
TN1306	PS(18:3(6Z,9Z,12Z)/24:1(15Z))	C48H86NO10P	HMDB0112467	38.6501	27.0107	28.7829	23.4382	24.2225	18.0941	25.1766	14.5942	27.7484	13.0972	6.46282	8.33695	2.89575	19.4164	25.1556	22.5303	14.4679	10.6699	35.578	29.4009	28.8539	14.347	26.0214	19.6071	7.2982	2.79855	17.9032	2.57664	18.3244	10.5729	5.89886	10.2828
TN708	PS(20:1(11Z)/15:0)	C41H78NO10P	HMDB0112542	33.8417	37.8292	28.6172	28.8266	28.4965	26.3488	29.2779	29.4201	29.9434	28.9205	29.3301	27.8663	27.2768	31.2137	28.2886	28.2442	28.6355	29.0149	21.8253	23.5685	30.1911	28.4581	28.0212	24.4994	23.8894	26.1463	27.1577	24.3302	23.812	25.6037	27.9888	27.0735
TN2346	PS(20:2(11Z,14Z)/18:0)	C44H82NO10P	HMDB0112572	14.2244	65.3716	5.06901	47.052	18.7993	7.34787	25.4907	12.9619	84.2724	20.3039	169.824	19.7299	7.047	67.0557	30.1899	117.893	27.0287	6.07445	34.3499	32.1228	49.3561	24.6409	35.7135	10.0956	346.886	17.1032	14.176	136.358	182.728	31.6725	4.70125	10.5357
TN117	PS(20:3(5Z,8Z,11Z)/15:0)	C41H74NO10P	HMDB0112595	161.439	160.462	138.785	140.752	137.03	134.345	137.342	141.869	134.612	137.431	139.493	137.87	137.058	141.991	135.792	132.273	131	131.624	123.414	130.152	122.898	127.937	127.816	123.496	124.631	122.076	122.812	120.959	121.005	127.7	122.821	120.494
RP1007	PS(20:5(5Z,8Z,11Z,14Z,17Z)/24:1(15Z))	C50H86NO10P	HMDB0112706	123.559	65.4198	98.5889	100.772	90.9543	86.8672	99.3662	96.2573	85.793	57.5905	61.741	87.6514	74.916	68.6936	50.5425	70.7501	60.3288	68.2045	79.6711	69.255	51.0527	50.7342	63.0329	69.2149	46.8759	79.3448	94.6231	30.4173	57.7278	50.1171	44.2125	46.4957
TN933	PS(22:5(7Z,10Z,13Z,16Z,19Z)/22:2(13Z,16Z))	C50H84NO10P	HMDB0112858	20.6043	23.0304	16.9434	17.5353	22.2781	13.4538	24.5516	32.7262	16.1843	7.48004	6.54084	19.2187	0.512731	7.58638	17.8185	23.5995	10.6693	23.838	17.1607	16.9023	10.6129	6.54102	13.7095	7.85754	5.94435	12.2681	10.812	6.08215	8.72861	9.07551	10.5639	15.3122
RP1498	PS(22:6(4Z,7Z,10Z,13Z,16Z,19Z)/24:1(15Z))	C52H88NO10P	HMDB0112880	73.1162	14.0489	63.2079	81.9617	50.8703	37.0872	54.9102	48.9278	37.7673	72.3467	36.8152	59.1477	34.0225	46.8093	19.2071	55.2009	53.0943	41.591	35.4173	55.2088	79.7275	25.9363	44.1071	43.9962	27.0115	18.0088	34.5423	16.7846	26.3614	24.239	32.3792	18.2157
TN683	PS(24:0/24:0)	C54H106NO10P	HMDB0112908	9.95113	5.90469	4.99711	7.61963	5.94866	5.80513	7.95469	9.13409	9.91775	5.5368	6.73379	9.4986	7.19657	5.19729	10.2833	8.30685	6.86465	6.79344	7.32945	5.82325	8.5314	6.97004	5.42724	5.45337	4.88576	5.50016	7.3582	4.41093	6.5671	9.86157	4.39913	4.88574
TN912	PS(24:0/24:1(15Z))	C54H104NO10P	HMDB0112909	13.0881	10.6671	6.60166	8.92866	8.50122	9.8868	9.35292	8.00044	8.99944	5.33889	7.97837	7.98565	8.344	8.29644	10.7524	10.2463	6.73894	8.8157	8.07993	6.46361	8.7175	5.84916	9.0281	9.77426	5.50086	8.23222	5.47681	8.44967	6.21338	9.24829	6.05606	6.42126
RP833	PS(24:1(15Z)/15:0)	C45H86NO10P	HMDB0112912	1.78989	31.9076	23.6313	22.2094	18.0808	12.853	35.7587	22.0354	38.3138	34.7255	24.5994	29.1798	29.0533	30.0581	24.4297	28.3025	79.9894	84.721	64.2692	64.6467	43.0484	71.1773	72.8059	83.2894	75.1834	56.1526	48.1049	54.6537	36.3162	41.569	53.1712	45.9253
TN937	PS(24:1(15Z)/16:0)	C46H88NO10P	HMDB0112913	16.1324	16.5213	12.8225	13.6136	13.8562	10.7316	9.67885	11.251	10.9025	11.7905	10.2781	14.1316	11.6546	9.07305	10.2901	12.8089	11.4109	11.4837	7.67671	12.1544	11.6568	14.6	10.5298	10.0155	11.7924	11.3876	9.37749	11.1598	10.1221	10.9573	8.47729	9.53403
RP2192	PS(24:1(15Z)/24:1(15Z))	C54H102NO10P	HMDB0112934	507.034	234.744	606.699	514.794	528.745	547.841	585.415	569.398	472.346	394.351	305.206	409.559	432.359	295.498	287.842	454.57	468.014	461.628	599.344	577.207	505.21	356.445	504.286	360.311	407.075	324.298	535.24	204.881	323.38	358.634	358.969	276.529
RP1653	PS(DiMe(13,5)/DiMe(11,5))	C52H90NO12P	HMDB0061571	15.1431	11.2473	22.2222	25.4939	3.85617	23.9691	17.6491	11.3897	15.2968	11.9974	7.79912	16.9791	16.6143	15.396	22.0202	17.3604	38.4512	15.1633	27.1124	25.8164	25.8476	18.4473	20.1344	14.3507	14.4733	32.3782	47.3458	14.5979	22.242	19.5823	26.5787	9.99062
TN2126	SM(d18:0/14:1(9Z)(OH))	C37H73N2O7P	HMDB0013462	60.9844	56.9874	60.8339	48.2757	61.2662	58.7869	57.2866	56.0332	51.6667	50.607	33.0295	58.2267	54.6651	49.3476	56.004	50.8889	59.9377	61.1463	52.9505	47.2141	46.6792	41.7622	46.553	50.2895	27.3637	56.8755	55.9236	40.1011	41.8113	54.5057	52.6208	53.9543
RP3100	SM(d18:0/18:0)	C41H85N2O6P	HMDB0012087	30.4509	28.4642	25.9334	30.8528	32.4676	34.917	31.6357	22.0158	21.9361	23.9766	23.8115	23.1848	23.0903	30.9086	25.9156	17.1291	32.242	21.9204	17.2808	27.7201	35.3898	29.8988	28.5991	20.6992	20.1641	28.3147	31.5779	26.0964	24.1505	25.5558	28.2074	22.0786
RP447	SM(d18:0/20:2(11Z,14Z))	C43H83N2O6P	HMDB0013465	0.236495	0.494995	3.36877	0	2.16963	0.869061	1.47672	0.533772	0.431537	0	0	1.35337	0.96943	2.07131	0	0.52973	72.5331	62.5864	71.2564	99.356	89.863	170.524	191.988	305.683	329.998	294.237	294.18	277.926	289.139	228.085	161.867	178.608
RP2951	SM(d18:1/16:1(9Z))	C39H77N2O6P	HMDB0240613	0	0.943473	0	0	7.35828	15.0596	58.7182	56.2616	56.5869	47.5165	49.8685	76.6871	29.3647	54.1743	71.1571	37.6465	26.6116	61.5213	11.8409	237.296	67.0711	83.4281	58.225	54.3733	54.3289	63.3252	105.524	81.328	66.0454	68.9006	61.6519	79.1242
RP365	SM(d18:1/18:0)	C41H83N2O6P	HMDB0001348	0.700765	0	0	0	0	0	0	1.28072	0	1.15587	0	0	0	0.617769	0.312841	0	127.633	96.4051	142.765	112.626	51.8353	95.2597	78.3381	117.205	77.3784	64.9488	75.9818	77.3682	80.5154	107.084	169.05	261.542
TN2096	Stearyl citrate	C24H44O7	HMDB0032521	256.842	104.004	236.427	190.491	191.333	207.452	210.381	211.303	129.576	127.529	97.8527	107.051	35.8606	101.835	98.1494	89.2952	155.787	127.117	219.973	209.724	160.569	142.29	191.016	160.336	88.6774	114.447	118.146	63.3748	92.7839	105.323	100.207	76.8019
TN1307	TG(12:0/15:0/22:0)	C52H100O6	HMDB0095502	15.2426	9.78927	9.26402	11.7664	8.50217	13.0835	7.39018	9.64984	10.0684	9.04658	6.40022	11.3293	8.30949	8.35115	10.8038	11.2903	7.86532	10.4988	7.88921	7.79062	7.0342	6.75674	11.9762	10.5185	8.22791	6.13748	9.86786	10.3584	12.4248	8.63932	7.30612	8.65828
RP2568	TG(14:0/15:0/22:1(13Z))	C54H102O6	HMDB0042104	20.8574	9.70657	9.06226	17.0417	17.044	15.4446	14.3332	16.8205	17.0659	18.7339	9.8566	15.5412	17.8571	13.1434	11.8344	16.7467	18.9606	16.0543	19.9143	11.8166	18.1501	14.8525	21.0321	16.3076	20.9562	11.1444	19.1435	13.7288	20.2663	18.6904	18.5917	14.1595
RP966	TG(14:0/15:0/24:0)	C56H108O6	HMDB0042097	19.6605	12.0225	9.2941	11.3631	12.3339	17.8505	23.3705	9.20499	18.6773	5.19713	11.88	11.2203	13.9841	13.1589	11.0011	17.3302	13.6208	20.4774	25.472	18.8396	14.19	17.6998	18.1106	20.0303	16.9759	16.4092	21.3917	20.3083	21.4086	14.0741	21.8405	15.3555
TN2557	TG(14:0/18:1(11Z)/o-18:0)	C53H102O5	HMDB0042360	13.2292	12.2435	6.08223	11.0626	13.1239	11.4816	12.0087	9.99714	11.5028	8.51794	7.38233	10.8252	9.10231	10.153	12.3093	12.9731	10.3223	14.0766	9.13681	7.26659	14.2462	7.0833	11.1603	9.44221	9.10919	11.0254	13.1246	7.85077	9.44067	9.47807	8.0831	9.73962
TN1371	TG(14:0/18:1(9Z)/o-18:0)	C53H102O5	HMDB0042390	10.5059	12.883	7.891	8.79683	12.023	15.6535	8.63595	9.72845	10.1714	5.5649	8.42873	18.1392	15.9112	9.30093	16.7338	11.1983	11.6513	13.6305	10.6796	9.5828	8.7987	5.56458	10.1708	8.98842	10.9316	10.9795	10.2408	11.4064	10.3527	8.97089	8.6776	7.08512
TN1047	TG(14:0/20:0/o-18:0)	C55H108O5	HMDB0042210	8.20027	11.1721	4.92178	5.43394	9.62569	10.9737	7.47478	8.30979	11.3349	8.67618	4.94623	11.6978	9.24521	4.7413	11.5242	11.2875	6.5719	10.1289	6.70543	5.56294	10.141	5.17849	7.87172	8.1521	11.4511	7.00756	9.49859	7.33669	5.25011	8.22709	5.27774	9.16838
TN1016	TG(14:0/o-18:0/18:0)	C53H104O5	HMDB0042934	6.99149	12.1329	7.90629	13.0617	14.3484	15.9316	6.65194	12.3847	11.6112	5.71477	6.83957	10.371	10.3518	12.1288	12.2456	11.0697	9.58289	9.04481	8.62258	10.5107	8.48691	5.23203	10.3242	10.33	11.2384	9.95296	10.4332	9.56665	9.96802	7.55336	5.41105	10.2502
RP2400	TG(14:0/o-18:0/22:0)	C57H112O5	HMDB0042936	15.96	23.0734	13.1367	14.6266	26.139	24.7152	11.8115	10.4361	23.9038	8.28259	11.3632	23.073	30.5028	14.382	23.8972	12.6669	17.1475	25.9873	17.6877	19.2853	16.8397	10.2364	19.1072	24.6661	14.4006	26.748	30.4485	26.8533	16.8746	31.6554	30.1921	16.4077
TN2555	TG(14:1(9Z)/20:0/o-18:0)	C55H106O5	HMDB0047838	12.0348	20.5491	8.48683	9.46264	15.1856	12.037	11.3533	11.9749	14.1673	10.211	12.4447	13.1033	9.41663	6.51857	10.2134	12.7033	11.4866	15.2676	12.2135	10.0537	8.45321	5.08576	11.403	9.6209	14.3973	11.8605	13.2516	13.6365	13.0079	11.1707	11.2499	14.4534
RP2356	TG(15:0/16:0/20:3(5Z,8Z,11Z))	C54H98O6	HMDB0043029	19.5695	11.9609	18.1657	21.397	17.2484	18.902	25.1097	19.3397	20.1476	3.3991	13.1737	22.7671	17.219	13.5095	20.4331	26.8918	29.0187	24.4382	29.9826	13.6972	28.6545	11.485	20.121	19.9544	30.8066	21.0932	21.1466	19.6665	27.8617	24.3348	17.0556	14.7557
TN1923	TG(15:0/18:0/20:4(5Z,8Z,11Z,14Z))	C56H100O6	HMDB0043065	12.0863	8.4453	5.41471	10.3103	10.7968	12.0179	9.64131	10.8461	10.196	7.13404	7.06658	12.5548	11.836	5.42954	10.6775	7.59719	12.3462	10.0097	10.9981	7.98452	6.83948	6.45767	8.57521	10.4908	5.51574	9.8861	7.28189	10.8548	12.3178	7.49882	7.86332	6.48821
RP2370	TG(15:0/18:1(11Z)/20:4(5Z,8Z,11Z,14Z))	C56H98O6	HMDB0043239	20.3869	9.04593	7.96226	11.8196	16.2093	18.0076	19.0139	18.512	16.0584	10.3797	16.4257	15.6734	16.4151	12.168	11.5414	22.252	17.6723	14.2327	21.1283	9.60756	16.1706	8.08519	15.0909	16.0025	17.1354	20.0985	18.7817	20.8195	20.2035	19.5872	25.0762	14.2249
TN1790	TG(15:0/18:1(9Z)/20:2n6)	C56H102O6	HMDB0043266	12.6061	12.3724	8.53659	8.73921	13.9944	10.5006	7.37602	11.3667	10.1421	5.72955	7.07527	11.5926	10.4974	8.99006	12.1378	9.51902	11.5971	12.1578	8.84945	6.69901	9.53384	6.68642	7.08015	11.0326	9.45546	11.2804	14.2698	12.3028	10.5076	8.78576	8.27405	5.81115
TN2680	TG(15:0/18:1(9Z)/22:0)	C58H110O6	HMDB0043254	9.79286	8.9648	7.99464	8.55058	10.5001	5.90278	11.5033	8.64582	9.3649	3.84085	5.16001	6.11261	4.94079	8.55976	7.43552	8.65215	8.7847	6.03595	10.6361	4.71361	10.4468	4.39472	6.13896	7.80198	8.62783	8.10404	13.3844	10.7034	7.23695	6.91502	7.29674	9.4987
TN1127	TG(15:0/18:1(9Z)/o-18:0)	C54H104O5	HMDB0043278	16.4455	11.4417	8.11001	8.35368	9.4619	11.2988	11.616	7.04458	10.3037	6.45309	6.57523	10.5884	5.30731	7.89916	8.00436	12.2871	10.4996	9.33297	10.5306	12.458	6.19951	6.1728	7.28327	5.95756	5.4178	8.55999	8.36384	8.99711	9.03633	8.93606	8.03129	5.4056
TN1160	TG(15:0/18:3(9Z,12Z,15Z)/22:2(13Z,16Z))	C58H102O6	HMDB0043646	11.5534	14.0767	7.55674	10.3434	6.57464	11.9153	8.35394	8.47467	8.24182	5.52927	5.63616	8.2133	6.63429	9.29771	7.68924	9.30149	9.51114	8.52817	10.8773	7.82466	5.80641	6.85736	4.13935	8.52573	10.2902	8.76201	7.63873	5.63265	6.79533	8.91021	5.95749	9.24864
TN2266	TG(15:0/20:1(11Z)/o-18:0)	C56H108O5	HMDB0043307	23.3846	25.1886	12.5877	11.8186	30.6375	29.5546	20.8873	15.8932	25.8352	4.76453	21.9528	26.172	18.8627	11.4598	19.1027	20.5974	14.5227	29.0314	13.5925	16.9476	16.6443	12.5766	23.1454	19.7043	33.0616	29.0707	28.8335	19.6736	20.0648	19.3783	20.7557	16.061
TN2533	TG(15:0/20:3n6/18:0)	C56H102O6	HMDB0043484	6.83145	5.58323	5.39087	9.11697	9.5035	7.70287	6.57994	10.2744	9.31098	3.86569	6.39495	8.61994	8.76406	8.0076	7.78642	10.934	8.71911	6.78158	7.55294	6.31816	8.95104	5.53833	10.8536	10.4886	10.3504	7.5529	5.54671	11.0205	7.541	9.69843	10.0831	7.51181
RP2234	TG(15:0/20:3n6/22:6(4Z,7Z,10Z,13Z,16Z,19Z))	C60H98O6	HMDB0043509	21.8525	16.2	11.7907	14.4871	21.5489	25.3093	16.5116	17.5978	20.3106	6.04558	11.087	24.3225	20.1488	11.1892	18.6587	19.7269	19.802	19.4892	19.9009	12.4444	24.003	8.11559	21.8258	21.4851	21.3159	20.3083	20.1056	20.4407	32.2229	19.345	27.5887	18.2938
RP2770	TG(15:0/22:4(7Z,10Z,13Z,16Z)/22:5(4Z,7Z,10Z,13Z,16Z))	C62H102O6	HMDB0043590	24.2704	17.2262	14.4315	15.5907	17.5906	24.3621	18.678	14.3237	16.9913	9.13261	16.0682	16.9197	21.9378	10.6491	20.1988	20.7175	19.4488	24.936	31.9451	13.2259	19.5664	10.5535	22.9416	19.412	22.9003	15.0757	19.7299	20.2122	18.6402	19.5966	21.9973	12.805
RP2304	TG(16:0/16:0/o-18:0)	C53H104O5	HMDB0043912	18.0829	12.0426	11.297	13.5596	14.2188	21.3706	11.6495	13.8978	17.1721	12.73	14.8505	15.565	12.8577	9.41517	12.3623	12.9529	17.6424	17.9922	19.1712	13.8259	14.7035	5.76095	17.9324	14.9832	15.4713	22.736	21.97	16.2113	19.9678	17.6314	24.5875	10.2469
RP2715	TG(16:0/20:4(5Z,8Z,11Z,14Z)/o-18:0)	C57H104O5	HMDB0044388	13.5156	12.0888	15.0914	21.8423	16.8487	19.2317	17.3935	22.4128	17.6735	14.9047	15.2322	19.8245	13.8509	12.0215	11.5869	20.8762	20.479	23.2238	18.6409	18.2084	24.6517	11.4648	20.1019	17.1899	24.2342	19.8718	20.062	17.6344	20.6575	15.1811	19.3105	16.3882
TN1554	TG(16:0/22:6(4Z,7Z,10Z,13Z,16Z,19Z)/O-18:0)	C59H104O5	HMDB0044640	11.1095	6.20573	8.30322	7.62481	7.3858	10.4631	7.4431	7.94848	9.0311	8.13572	7.7525	5.7206	5.12759	9.07338	8.69819	7.39349	8.10504	7.47089	9.67747	5.51825	7.08828	5.64581	7.66708	7.35487	7.99692	7.70025	7.10448	4.49256	11.6949	7.65697	4.04573	7.17088
RP2492	TG(16:1(9Z)/20:3n6/18:1(11Z))	C57H100O6	HMDB0048810	21.7713	14.9953	17.8924	13.5069	22.5179	36.0869	22.2138	21.1502	23.7541	12.2092	15.7698	25.9267	18.4078	10.7577	16.3818	29.7504	29.3054	27.4774	29.8595	19.3605	20.6864	14.2767	30.2746	21.6591	25.6699	25.3415	21.8308	28.67	24.9885	24.8778	18.6853	26.5962
RP1912	TG(16:1(9Z)/22:4(7Z,10Z,13Z,16Z)/o-18:0)	C59H106O5	HMDB0048896	15.9514	7.81452	12.3941	14.2267	16.4544	15.705	14.9212	13.7816	14.8574	7.56351	6.32738	13.3838	14.677	5.86356	13.6489	16.0101	19.978	19.9627	22.3842	10.6738	18.0824	10.0406	22.9529	9.66507	18.6112	21.1387	12.8025	15.0414	17.5466	15.0785	17.2785	9.55889
TN2383	TG(18:0/16:0/22:1(13Z))	C59H112O6	HMDB0044732	10.7606	13.6993	8.52513	8.24463	9.29714	15.2556	7.7559	9.59071	12.9074	4.34743	10.1383	13.6979	10.1321	6.21248	10.3601	9.98776	8.39425	13.1391	6.24325	7.54907	9.40525	5.59159	9.91036	9.80822	10.9185	12.49	12.8541	12.9207	7.62842	10.0319	10.3026	9.17335
RP1355	TG(18:0/18:1(11Z)/20:3n6)	C59H106O6	HMDB0044926	17.155	17.0799	12.2647	15.6212	15.9358	15.7951	12.8491	12.29	12.6686	15.6405	5.17697	13.3894	11.6728	14.3837	12.8952	13.4589	23.4266	21.857	20.2544	12.3263	23.3741	12.1725	15.4219	12.1459	18.7489	19.7523	23.5938	17.0267	17.2485	15.5532	21.6161	14.8417
TN1742	TG(18:1(11Z)/14:0/24:1(15Z))	C59H110O6	HMDB0049077	10.983	13.355	5.3341	9.509	15.1457	13.4776	8.27484	7.53986	10.8726	3.16526	7.37138	10.243	7.4864	8.2739	10.2534	10.4675	9.10843	5.21423	13.1726	8.26238	9.46424	2.66801	6.06364	9.41134	9.90063	8.97703	10.3988	10.6117	9.98055	11.5477	6.64414	9.23238
RP2204	TG(18:1(11Z)/18:4(6Z,9Z,12Z,15Z)/o-18:0)	C57H102O5	HMDB0049596	24.3513	9.28886	14.5498	15.2034	19.1143	21.9566	14.3913	21.6608	17.2173	7.67956	11.5521	18.4035	15.7519	8.89354	15.5725	20.7019	19.2573	29.7978	25.3021	14.3683	23.7709	8.40668	20.4284	24.2217	21.9429	20.5508	25.6844	22.5593	23.1904	9.25171	13.9899	14.5964
RP1811	TG(18:1(9Z)/16:1(9Z)/20:1(11Z))	C57H104O6	HMDB0049862	13.548	7.21259	9.31886	10.7804	10.8802	17.3735	10.7183	15.639	18.3847	5.37983	15.8576	11.5523	14.5416	11.8893	11.9424	18.9658	19.0772	14.7777	14.6955	10.7822	16.7728	8.53123	17.3233	11.2532	21.8784	17.9276	18.8107	19.2796	19.269	16.7635	24.691	16.901
RP2292	TG(18:1(9Z)/18:0/18:3(9Z,12Z,15Z))	C57H102O6	HMDB0010456	17.4284	16.0556	14.6508	14.5135	15.4237	17.379	20.4549	14.9796	16.0695	6.34178	17.1656	16.0122	17.8706	6.43394	15.072	21.9316	20.107	19.8171	27.6419	11.7219	17.6077	10.5526	20.6663	17.5091	17.1525	19.7821	18.557	15.8992	25.1713	25.4607	19.5365	17.6652
RP1276	TG(18:1(9Z)/18:2(9Z,12Z)/o-18:0)	C57H106O5	HMDB0050020	17.6949	17.3661	11.5207	12.4902	23.1408	22.6961	14.1167	14.6411	15.1951	15.5154	9.83598	15.2167	22.8577	14.569	11.9383	16.7992	20.0919	19.5358	22.0253	14.0187	23.7509	7.49237	19.4629	20.1523	16.8905	20.3859	27.8408	22.5075	23.0046	16.6056	26.1096	25.1773
TN1667	TG(18:1(9Z)/O-18:0/18:3(6Z,9Z,12Z))	C57H104O5	HMDB0050287	11.4348	10.8665	8.93329	14.5946	12.3074	9.54834	9.79901	11.317	7.84069	6.56176	7.42043	9.98474	8.21461	8.18203	9.87083	11.4287	13.0082	10.1134	14.5081	13.8266	8.43813	10.8041	9.6866	9.45786	11.7871	13.2648	8.89553	13.5094	9.79815	7.9797	8.95899	6.43079
RP899	TG(18:3(9Z,12Z,15Z)/22:6(4Z,7Z,10Z,13Z,16Z,19Z)/18:4(6Z,9Z,12Z,15Z))	C61H92O6	HMDB0055345	10.0254	9.62528	20.1856	9.09583	19.9576	15.8941	21.0147	40.15	39.3846	28.9473	15.5785	43.076	43.0406	35.0328	53.8394	58.7382	43.8041	45.6487	49.9514	50.4685	38.0075	55.5463	50.3121	55.9878	52.3677	55.0317	51.4625	46.0949	50.1543	53.2253	53.4939	52.2469
RP2434	TG(18:4(6Z,9Z,12Z,15Z)/15:0/o-18:0)	C54H98O5	HMDB0055368	15.2788	13.3433	9.42934	20.4032	16.9025	15.8704	18.4028	17.1204	19.506	7.03436	12.6446	18.8647	11.5695	15.1571	16.1517	25.0068	21.2389	23.2581	29.6331	12.3637	19.6454	9.18764	17.0873	19.512	18.7857	21.8283	25.8899	17.7203	20.285	17.5967	13.164	14.6321
RP1567	TG(18:4(6Z,9Z,12Z,15Z)/20:1(11Z)/22:6(4Z,7Z,10Z,13Z,16Z,19Z))	C63H100O6	HMDB0055427	13.8472	8.22133	11.7439	10.3055	17.6965	14.0715	13.7376	13.954	10.4443	8.27517	12.6526	15.174	11.4281	6.43749	9.0843	20.6789	18.6999	23.6905	16.0752	17.1297	14.6339	7.14556	15.5141	17.139	20.4068	21.4358	20.2057	13.3389	16.6181	14.0682	18.9036	19.8141
TN2527	TG(20:0/20:5(5Z,8Z,11Z,14Z,17Z)/18:3(9Z,12Z,15Z))	C61H102O6	HMDB0046172	7.21191	6.23261	6.9042	6.44248	7.73421	10.0126	4.19069	9.52161	10.4839	4.59561	8.40519	10.4934	4.19572	3.91403	6.71252	7.04016	10.6926	5.47169	6.59647	8.59926	8.07498	5.50151	5.18559	9.19233	7.37872	6.10717	7.22057	6.63356	7.57484	4.17751	8.32617	5.33403
TN1826	TG(20:0/O-18:0/14:1(9Z))	C55H106O5	HMDB0046234	11.4145	12.0849	9.74452	14.0547	7.9932	13.178	10.2452	11.2337	11.528	8.06064	11.6018	9.9591	13.0839	7.1021	11.2233	11.2573	12.1976	12.688	13.6825	10.3237	10.6538	12.0791	12.5798	9.666	9.31449	6.28248	9.15325	10.7095	8.6049	7.63519	9.60888	7.12082
RP1313	TG(20:1(11Z)/15:0/o-18:0)	C56H108O5	HMDB0050337	11.3012	12.5729	10.0977	12.584	17.9627	16.9856	14.2179	14.8696	20.9163	7.46302	14.4206	12.4349	13.5727	9.03474	9.33221	13.2388	16.5546	16.5287	24.6443	9.37629	20.1687	16.818	19.9117	20.2398	24.808	20.7029	18.729	18.4647	20.1084	15.1953	10.8491	9.39162
TN1537	TG(20:1(11Z)/18:1(11Z)/o-18:0)	C59H112O5	HMDB0050489	15.8677	11.9973	5.42476	7.08792	12.4011	14.9485	7.1733	7.20612	12.554	10.6195	10.0979	10.023	10.2652	8.40494	12.5888	10.8568	10.4826	8.42955	8.34653	7.50761	8.6947	5.19915	11.1533	8.52676	7.84128	9.59624	9.10854	13.2973	13.9725	9.10892	8.49858	6.38424
TN1560	TG(20:2n6/15:0/o-18:0)	C56H106O5	HMDB0053289	19.5061	25.3694	15.7217	9.18047	21.3126	30.5913	14.8464	12.3859	17.2306	4.6936	11.0852	20.2148	23.1097	10.69	24.96	16.3599	14.4906	17.9024	13.4206	9.63111	14.8503	4.90441	10.3754	14.0033	23.886	20.2002	17.612	17.7886	18.2186	17.8891	15.2516	12.8062
TN781	TG(20:2n6/18:4(6Z,9Z,12Z,15Z)/20:3n6)	C61H100O6	HMDB0053577	13.0703	8.2762	7.09123	8.3432	9.65565	11.5163	9.52272	9.67645	7.74959	6.6786	8.88354	8.27539	9.95212	5.23974	10.3365	8.96252	9.33874	11.0894	8.47323	7.05036	8.95718	4.47805	6.62078	5.44778	8.97499	8.49349	7.04429	5.53013	9.00767	5.66977	7.27176	5.65054
RP1228	TG(20:3(5Z,8Z,11Z)/15:0/20:2n6)	C58H102O6	HMDB0050892	19.0288	20.5952	12.1531	12.6154	15.502	14.0296	12.5045	14.4287	14.9764	6.46796	15.7155	19.7474	15.1573	6.41749	13.9055	14.4063	17.8407	21.743	21.4443	14.0332	22.7326	13.6995	20.7282	14.1799	22.2893	19.4556	23.0254	14.1912	22.2655	22.9868	23.298	16.9809
RP1164	TG(20:3(5Z,8Z,11Z)/15:0/o-18:0)	C56H104O5	HMDB0050904	14.1996	10.872	12.8176	8.43093	10.977	18.624	13.8133	12.19	14.9164	3.43622	12.9239	14.2242	16.6541	9.67504	10.3783	16.6826	15.2649	27.0811	21.7431	14.1805	16.752	10.7374	18.3904	16.3733	17.6931	18.4659	19.3923	17.128	19.8602	17.1264	18.9564	17.8188
TN1598	TG(20:3(5Z,8Z,11Z)/18:4(6Z,9Z,12Z,15Z)/o-18:0)	C59H102O5	HMDB0051318	10.0697	9.9039	8.27671	9.97311	10.9994	12.0016	14.4029	8.3614	10.3634	5.1438	6.26574	12.498	5.98077	6.25382	9.05047	6.38335	10.2192	9.05004	9.96484	8.73096	7.75419	7.00095	7.92358	6.15724	11.3509	9.12851	9.90437	12.9365	6.95758	6.84374	8.44843	5.84773
TN939	TG(20:3(5Z,8Z,11Z)/20:3(5Z,8Z,11Z)/20:5(5Z,8Z,11Z,14Z,17Z))	C63H100O6	HMDB0051099	11.1765	8.67727	8.79744	7.56255	5.009	9.2573	8.22531	8.42445	9.47788	5.43632	4.85416	10.3516	5.03186	4.15578	9.9884	6.78364	8.47795	8.14605	8.63491	7.17486	6.65349	4.98602	6.77425	5.83772	6.37418	5.47722	4.97162	4.60201	5.45428	11.1875	5.95277	4.90462
RP1629	TG(20:3(5Z,8Z,11Z)/20:3n6/22:6(4Z,7Z,10Z,13Z,16Z,19Z))	C65H102O6	HMDB0051209	12.2034	11.3657	9.49466	6.51763	11.8053	16.71	15.5459	12.9598	19.0038	8.21623	14.1457	16.9078	18.4618	13.0347	12.8161	18.8794	19.3261	19.5465	19.0236	18.0986	16.3187	6.20119	17.0508	15.9433	24.1588	19.7125	23.161	18.8006	16.6973	16.6309	19.6204	9.80235
RP1648	TG(20:4(5Z,8Z,11Z,14Z)/22:6(4Z,7Z,10Z,13Z,16Z,19Z)/o-18:0)	C63H104O5	HMDB0054330	15.7245	11.6108	7.47559	6.64111	11.6015	17.9433	19.4254	12.2563	18.5622	10.789	8.79974	16.0242	17.8044	7.0654	11.4056	18.4392	21.6036	21.1146	20.6043	13.299	25.1805	9.89843	14.5508	19.4056	21.9052	17.0167	15.8293	18.9731	15.9022	14.1219	21.5103	18.3221
TN1124	TG(20:4(8Z,11Z,14Z,17Z)/22:6(4Z,7Z,10Z,13Z,16Z,19Z)/20:4(8Z,11Z,14Z,17Z))	C65H98O6	HMDB0055676	5.98784	7.98794	3.81304	8.58244	5.81868	9.99202	6.31807	6.8611	10.285	5.04982	8.96828	8.40766	4.68861	7.81987	9.86006	6.4934	7.88248	6.71009	8.08593	4.78369	5.33815	5.30145	8.60812	5.50352	5.99862	8.42592	5.46719	3.89929	7.2147	7.71814	5.75701	7.49237
TN381	TG(20:5(5Z,8Z,11Z,14Z,17Z)/15:0/o-18:0)	C56H100O5	HMDB0055692	11.3173	12.6647	9.67785	12.6168	12.4684	14.2524	8.5394	11.549	10.6984	10.1299	9.97789	13.6319	7.61799	10.6291	9.72863	10.4339	10.0922	10.5691	9.03138	7.20146	8.72239	6.2867	9.42082	9.1043	7.17191	7.52903	8.86303	6.59241	6.50905	7.51293	5.68699	6.31504
RP1917	TG(20:5(5Z,8Z,11Z,14Z,17Z)/20:4(8Z,11Z,14Z,17Z)/22:6(4Z,7Z,10Z,13Z,16Z,19Z))	C65H96O6	HMDB0055787	11.9663	9.54224	12.7602	12.8878	11.8369	17.6159	11.6969	18.1834	14.133	10.0827	13.2514	12.2764	16.8712	17.6508	12.1768	18.3958	19.9606	26.4253	19.2544	11.0767	11.3755	8.50388	22.4043	17.7362	19.7208	21.4853	17.8992	14.2421	20.7431	15.2469	19.218	17.5793
TN1106	TG(20:5(5Z,8Z,11Z,14Z,17Z)/22:6(4Z,7Z,10Z,13Z,16Z,19Z)/22:6(4Z,7Z,10Z,13Z,16Z,19Z))	C67H96O6	HMDB0055799	7.88826	8.27287	4.37221	12.1087	8.21696	9.0311	8.18041	6.61311	7.7966	10.139	7.79671	5.84275	5.07381	6.63444	9.93827	9.50112	5.57776	5.26599	7.85169	6.14556	4.35841	5.96879	7.59851	7.18256	5.64922	7.37808	9.10383	7.60215	8.03032	4.7463	8.36128	6.11578
TN1077	TG(20:5(5Z,8Z,11Z,14Z,17Z)/22:6(4Z,7Z,10Z,13Z,16Z,19Z)/o-18:0)	C63H102O5	HMDB0055800	8.66223	6.75697	5.82527	7.23987	6.41133	10.5198	8.16095	7.71344	12.7986	16.6045	9.96597	9.30339	7.27835	8.28976	7.23549	8.90055	7.39383	8.41631	8.42632	8.46282	7.43518	3.4342	7.56207	6.553	4.45166	10.2572	6.52623	10.2567	6.67565	5.35296	8.91817	3.59275
TN1887	TG(20:5(5Z,8Z,11Z,14Z,17Z)/o-18:0/20:5(5Z,8Z,11Z,14Z,17Z))	C61H100O5	HMDB0055801	13.1707	6.6666	4.55691	6.82038	9.08558	9.06834	10.1949	9.03377	5.8664	5.63096	7.253	9.5742	7.24623	6.23801	8.45659	9.737	11.7316	8.33335	11.1106	7.96353	8.30073	6.33336	10.6822	6.85387	10.9676	8.87855	9.36717	7.19697	7.4158	6.3116	10.256	8.28043
TN2393	TG(22:0/16:0/14:1(9Z))	C55H104O6	HMDB0046308	14.0567	12.8812	10.8806	8.7624	12.9335	17.7597	10.2839	8.95021	11.3032	3.04602	14.3106	11.5873	10.8742	12.0706	9.95708	14.2876	8.65468	14.5584	10.7797	7.67745	10.9397	4.76185	10.4533	10.1882	13.288	14.5741	8.17687	12.1443	11.5224	12.0124	15.4068	11.6293
TN2301	TG(22:1(13Z)/14:0/o-18:0)	C57H110O5	HMDB0051424	13.2761	10.8701	9.74149	9.10789	17.6716	11.6328	10.9043	9.6288	10.4254	4.82613	8.53142	10.8414	9.47423	10.1289	14.8246	12.3129	10.0595	9.01453	11.4902	12.1229	7.81769	5.5793	8.56987	7.34777	11.0959	14.1719	13.3387	18.1118	13.1633	9.7402	14.0098	17.1574
RP3153	TG(22:2(13Z,16Z)/15:0/22:6(4Z,7Z,10Z,13Z,16Z,19Z))	C62H104O6	HMDB0054359	12.4791	10.3655	7.67305	13.8034	14.8427	12.9502	13.6451	9.94175	16.189	8.97442	13.6461	14.8833	13.5238	9.18209	12.2887	13.5386	17.811	18.8643	13.2496	7.39812	13.2464	5.47051	16.7398	15.3354	14.143	18.2016	17.0134	13.7668	15.9257	15.4638	17.3686	17.703
TN2108	TG(22:4(7Z,10Z,13Z,16Z)/15:0/22:6(4Z,7Z,10Z,13Z,16Z,19Z))	C62H100O6	HMDB0054656	11.6974	8.24896	12.6794	9.94522	14.2621	13.1813	9.26184	11.3706	11.5158	7.16594	6.79416	9.9734	7.51373	7.41772	11.1169	14.5674	10.4524	14.2203	8.52846	11.2538	11.7337	8.1609	9.93743	13.8909	8.10158	11.7716	9.67664	8.04539	7.98719	6.43239	6.40687	7.62259
RP2315	TG(22:4(7Z,10Z,13Z,16Z)/15:0/o-18:0)	C58H106O5	HMDB0054657	20.0857	15.0465	13.7978	12.6022	19.8545	20.7405	15.7983	16.7392	13.8112	17.9946	12.8828	19.7009	14.0431	10.5394	9.27842	19.7059	15.2776	25.6316	23.7083	11.8158	18.062	7.77949	17.4955	20.5013	15.6149	18.3511	23.6593	19.1731	21.1088	22.947	13.8896	21.9512
RP1873	TG(22:4(7Z,10Z,13Z,16Z)/16:0/22:5(7Z,10Z,13Z,16Z,19Z))	C63H104O6	HMDB0054664	16.8633	8.90685	8.3536	11.4826	20.882	16.8117	15.9328	13.8299	22.1566	12.7316	11.1386	13.8982	13.1622	8.67183	8.2632	17.4715	24.9819	22.7821	15.3665	9.68147	16.453	8.11866	20.9509	14.4208	18.5208	20.3501	22.0117	11.0809	23.5778	18.9802	24.0801	14.8794
TN1096	TG(22:4(7Z,10Z,13Z,16Z)/18:3(6Z,9Z,12Z)/22:6(4Z,7Z,10Z,13Z,16Z,19Z))	C65H100O6	HMDB0054791	7.93973	8.59761	4.62159	8.29639	10.8672	11.2497	5.07065	7.16958	8.27815	3.74006	5.25136	9.34549	7.90264	7.58786	7.26806	7.27881	9.07133	6.48726	7.64332	5.60641	9.63984	3.54567	5.49262	8.15785	7.83377	9.90042	9.45021	5.98974	5.45838	3.27184	3.54784	5.29703
TN983	TG(22:5(7Z,10Z,13Z,16Z,19Z)/15:0/22:6(4Z,7Z,10Z,13Z,16Z,19Z))	C62H98O6	HMDB0055808	10.0042	8.96674	7.8179	8.64845	11.7199	10.5169	5.7018	8.66552	9.86316	5.88251	6.35984	9.02902	5.76609	7.84094	10.3088	9.28067	8.83224	6.39042	10.5156	7.31283	8.33476	6.82604	11.7584	5.96751	7.52155	7.74269	7.46059	7.3033	8.83903	7.80649	6.49807	4.24575
TN1488	TG(22:5(7Z,10Z,13Z,16Z,19Z)/15:0/o-18:0)	C58H104O5	HMDB0055809	13.9731	13.3644	9.74125	8.4317	9.3911	13.6773	11.4934	11.5678	12.0607	7.45978	9.92148	10.9875	6.16789	11.2533	10.0871	9.88374	14.421	10.4636	11.9293	7.78349	6.46374	6.24566	9.505	9.71416	10.6384	10.487	9.89339	9.37458	7.36482	7.60562	4.00533	7.49575
TN2803	TG(22:5(7Z,10Z,13Z,16Z,19Z)/20:4(5Z,8Z,11Z,14Z)/22:6(4Z,7Z,10Z,13Z,16Z,19Z))	C67H100O6	HMDB0010551	8.18195	11.6738	5.22956	10.3826	8.96966	10.3047	7.59191	11.1007	6.81043	7.91625	4.27781	9.53272	6.7269	6.65945	7.94523	8.97743	9.53132	8.18418	9.21612	7.83641	8.59725	4.21056	9.95963	7.69858	9.56731	9.50974	8.08167	5.23801	9.76556	6.35778	5.90103	8.30876
TN894	TG(22:5(7Z,10Z,13Z,16Z,19Z)/22:5(4Z,7Z,10Z,13Z,16Z)/22:6(4Z,7Z,10Z,13Z,16Z,19Z))	C69H102O6	HMDB0055871	8.96783	6.27373	4.69709	6.31695	8.62358	9.88823	8.25492	6.3922	8.43655	7.15166	5.86909	6.33145	6.97696	7.44856	8.98038	10.5238	7.42621	7.22644	9.16795	5.29552	5.7093	5.92633	5.02202	5.88305	4.42558	7.04696	6.21311	7.26442	7.3362	4.6783	5.69836	6.03193
RP2938	TG(22:6(4Z,7Z,10Z,13Z,16Z,19Z)/16:0/o-18:0)	C59H104O5	HMDB0055898	19.8418	17.977	9.45801	18.3798	17.5219	23.547	15.3567	12.0403	16.961	5.89909	8.12369	25.5989	14.9969	8.74237	18.3953	13.9285	18.0575	16.56	18.8941	12.6048	19.3715	4.78726	18.252	14.0115	18.4581	20.3948	21.8925	17.2271	20.1793	13.4589	12.5634	12.1822
TN1734	TG(22:6(4Z,7Z,10Z,13Z,16Z,19Z)/20:5(5Z,8Z,11Z,14Z,17Z)/o-18:0)	C63H102O5	HMDB0055946	7.62079	13.0834	10.4528	6.84721	12.9432	13.3909	7.17062	8.22921	9.73455	8.22203	8.93465	8.86323	9.06559	6.00125	6.53633	4.69774	12.9139	9.01799	11.2453	7.09339	10.4668	3.88006	8.60253	6.66403	4.00104	8.28555	11.5727	9.42137	11.3556	7.93651	7.23923	7.03121
TN1758	TG(22:6(4Z,7Z,10Z,13Z,16Z,19Z)/22:6(4Z,7Z,10Z,13Z,16Z,19Z)/22:6(4Z,7Z,10Z,13Z,16Z,19Z))	C69H98O6	HMDB0010562	4.93587	6.34071	7.55198	6.09894	8.02643	7.42765	5.27451	8.37847	9.41423	3.57654	7.27584	4.94788	5.52058	7.68316	7.90646	7.83342	8.36462	6.7573	8.62351	4.93388	4.97421	4.67212	5.9349	5.80487	5.22668	4.10943	7.55092	5.43505	4.46923	4.10986	5.25984	6.51059
RP2934	TG(8:0/8:0/10:0)	C29H54O6	HMDB0072251	157.119	142.295	137.255	118.009	131.764	138.668	135.677	138.643	123.487	130.395	119.108	143.544	134.04	137.151	110.664	126.334	136.582	136.582	126.629	129.204	128.29	103.278	132.039	141.977	120.376	124.671	118.057	112.09	125.22	109.218	106.619	137.889
RP621	TG(i-13:0/8:0/8:0)	C32H60O6	HMDB0096560	39.4056	34.9777	39.2376	34.0802	34.1666	30.9378	34.6619	35.989	25.8213	36.9188	34.2028	31.1825	36.7172	37.1211	25.8206	33.9534	35.7871	39.0348	41.2705	35.8006	38.8217	38.7284	41.2173	40.8581	34.9014	41.4913	42.544	41.5089	39.952	37.0264	39.642	40.8765
RP1594	(-)-3-(3,4-Dihydroxyphenyl)-2-methylalanine	C10H13NO4	1550-536-579	36.5914	33.3326	39.7982	46.2169	55.5516	43.9005	38.9627	41.3574	37.2574	37.4145	37.2776	27.9785	35.1295	31.8357	35.6558	35.6325	34.2104	33.6527	39.1749	47.3202	37.5782	48.4192	35.3572	48.7163	36.341	32.3313	33.7565	28.453	27.2104	30.1362	30.4876	35.4911
TN1344	({3,4,5-trihydroxy-6-[3,5,7-trihydroxy-2-(2,4,5-trihydroxyphenyl)-3,4-dihydro-2H-1-benzopyran-8-yl]oxan-2-yl}methoxy)sulfonic acid	C21H24O15S	HMDB0126726	87.8731	52.9218	130.124	49.8521	119.262	49.2359	131.516	56.6283	80.7882	105.229	94.3674	29.7374	86.7904	43.8086	86.0056	78.8993	28.4949	42.7654	27.0843	72.7897	80.875	81.4028	135.832	44.4391	48.1879	38.4189	36.4766	70.7402	40.7787	33.8782	100.866	59.7755
TN1513	({4-[2-(2,4-dihydroxyphenyl)-3-(3,7-dimethylocta-2,6-dien-1-yl)-7-hydroxy-4-oxo-4H-chromen-8-yl]-2-methylbut-2-en-1-yl}oxy)sulfonic acid	C30H34O9S	HMDB0129676	125.043	67.8363	132.09	95.4348	90.1966	101.046	105.092	93.4198	62.041	63.2276	46.855	68.4172	34.0427	40.67	41.8352	60.5195	87.2012	83.7133	128.833	141.295	106.863	67.7986	118.729	94.7572	81.0342	65.7733	98.9693	49.5732	74.8574	69.1224	71.5754	61.7071
RP3203	({4-[4,6-dihydroxy-3-(6-hydroxy-3-oxo-2,3-dihydro-1-benzofuran-2-yl)-2-methoxyphenyl]-2-methylbut-2-en-1-yl}oxy)sulfonic acid	C20H20O10S	HMDB0125974	46.8922	61.1085	88.2066	69.5464	38.4605	36.6991	72.4461	45.1187	35.1615	47.7188	35.1468	40.5469	29.7431	73.8724	68.8036	38.7324	54.9975	41.2299	25.5027	83.3866	57.73	40.6783	33.5453	47.4361	45.4636	29.9756	45.6805	39.767	37.6811	69.4712	74.6021	49.4791
RP3310	({6-[(2-{4-[(6-carboxy-3,4,5-trihydroxyoxan-2-yl)oxy]-3-hydroxyphenyl}-7-hydroxy-5-oxo-5H-chromen-3-yl)oxy]-3,4,5-trihydroxyoxan-2-yl}methyl)[3-(3,4-dihydroxyphenyl)-1-hydroxyprop-2-en-1-ylidene]oxidanium	C36H35O20	HMDB0125188	65.1836	60.6277	88.5356	85.3192	83.1817	73.3225	86.5688	71.7831	97.8683	94.044	99.7147	95.1421	72.1981	87.271	102.669	95.3229	74.2876	79.8897	97.0764	79.6629	98.8076	105.128	88.5845	81.6823	90.9128	88.998	97.9232	90.9113	58.1911	84.7957	89.1234	76.0569
RP2250	(+/-)-Ethyl 2-hydroxy-2-methylbutyrate	C7H14O3	HMDB0032269	129.258	169.006	111.008	126.958	155.203	146.797	127.989	132.497	126.29	94.8029	147.105	109.408	125.492	114.257	150.387	147.723	135.967	129.904	116.141	142.405	145.274	116.388	132.074	152.565	163.673	132.194	130.961	131.645	159.511	154.069	155.499	149.417
TN12	(±)-(E)-13-Hydroxy-10-oxo-11-octadecenoic acid	C18H32O4	HMDB0040900	169.313	214.757	226.125	267.363	233.479	198.985	299.242	119.267	161.784	124.329	124.412	160.164	163.998	143.931	194.998	98.2366	50.5096	58.2877	80.9597	55.8048	57.8266	47.9325	34.4089	24.6425	28.858	24.6199	28.1717	26.6986	93.7048	27.0754	15.8934	11.2224
RP2112	(±)11(12)-EET Ethanolamide	C22H37NO3	HMDB0013652	69.2947	182.597	105.139	110.188	123.628	120.884	96.8827	98.8757	154.704	142.28	164.719	117.809	139.312	116.013	144.39	146.016	70.5588	108.299	165.491	131.803	112.615	95.9395	92.9345	90.2493	104.51	141.339	108.278	103.298	156.785	140.485	114.31	135.413
RP2303	(±)-Flufenprox	C24H22ClF3O3	HMDB0039360	59.223	79.8599	82.9447	112.68	64.997	46.4499	101.478	60.0662	48.8324	107.834	74.8705	48.0803	51.9179	77.3573	71.2905	60.9247	50.6673	44.6082	56.4232	83.0373	65.8613	123.616	54.5709	58.9665	48.3689	50.1421	46.5063	54.4928	40.0945	62.7706	68.6551	62.2919
TN486	(10betaH,11xi)-11-Hydroxy-13-nor-6-eremophilen-8-one	C14H22O2	HMDB0037605	38.3429	37.5092	31.7489	36.3368	31.2392	29.431	32.506	25.8949	32.9589	38.0575	41.1691	44.46	41.5568	47.4716	42.4444	52.0316	54.5916	60.0241	66.4947	65.2901	68.5665	63.6703	57.1996	41.8576	48.8127	54.5392	58.3417	56.7343	58.6554	49.0566	59.2596	54.3371
TN297	(10E,12Z)-9-HODE	C18H32O3	HMDB0062652	90.2638	260.387	205.977	265.679	211.669	210.375	213.887	190.566	213.339	197.863	169.524	301.242	23.0398	71.8782	53.0284	73.3147	27.7293	45.1898	41.596	21.0186	18.2938	21.597	30.9031	16.3658	20.8639	55.4495	38.5264	17.1103	29.0642	24.0449	23.2841	14.9378
RP1796	(1x,2x)-Guaiacylglycerol 2-glucoside	C16H24O10	HMDB0033301	212.669	231.329	318.607	281.04	304.418	278.902	285.942	246.543	184.011	228.99	193.291	194.982	172.643	217.167	170.713	192.976	222.792	210.283	221.28	302.339	370.185	220.53	229.516	246.087	212.781	203.002	219.553	166.364	217.37	209.751	212.434	211.124
RP1448	(22Alpha)-hydroxy-campest-4-en-3-one	C28H46O2	HMDB0012113	107.84	97.0815	120.512	99.273	147.817	124.433	118.36	113.168	12.6351	12.7354	14.9682	14.632	13.0532	13.3545	14.5116	11.3887	113.613	141.288	139.143	126.596	129.358	112.475	88.7474	115.742	18.7479	18.3208	12.1923	9.81239	16.773	13.9092	12.3189	12.2596
TN904	(23S)-23,25-dihdroxy-24-oxovitamine D3 23-(beta-glucuronide)	C33H50O10	HMDB0010361	82.9452	91.3526	113.646	82.2555	74.533	41.8726	81.0256	51.7487	41.3528	86.606	23.7444	51.6118	16.2525	43.2354	31.5196	32.2462	35.151	43.0794	47.9786	84.4278	63.2058	42.7338	42.7333	41.6271	31.3913	29.717	47.4873	18.3	25.9266	36.9616	40.889	47.4775
RP659	(23S,24S)-17,23-Epoxy-24,29-dihydroxy-27-norlanost-8-ene-3,15-dione	C29H44O5	HMDB0035843	219.155	223.821	224.568	209.501	218.036	229.005	226.352	223.92	214.065	229.75	221.914	220.88	218.785	234.69	225.745	231.81	239.453	228.194	246.849	230.994	238.201	238.366	241.735	242.909	239.046	225.949	233.489	226.9	229.277	233.651	236.885	231.441
RP856	(24E)-3alpha,15alpha-Diacetoxy-23-oxo-7,9(11),24-lanostatrien-26-oic acid	C34H48O7	HMDB0035388	96.0637	132.892	135.671	136.811	131.194	127.406	141.941	114.432	120.807	140.322	124.185	131.493	136.034	156.742	100.493	122.154	98.2397	80.7388	109.916	96.9453	125.512	118.19	100.072	115.061	94.0337	100.065	98.3581	81.6173	110.434	99.0064	109.563	107.144
TN2792	(25R)-3beta,4beta-dihydroxycholest-5-en-26-al	C27H44O3	HMDB0062736	39.2006	34.9962	32.4481	31.4953	33.1459	31.7783	32.8231	30.967	32.3483	30.6495	30.5961	35.7454	27.3651	32.8784	31.4205	30.862	30.1808	28.1413	31.3499	33.4734	30.2821	33.2971	31.4435	29.99	26.5527	33.2376	30.7378	31.9508	27.7844	34.4345	33.7607	30.5874
RP3114	(2alpha,3alpha,5alpha,22R,23R)-2,3,22,23-Tetrahydroxy-25-methylergost-24(28)en-6-one	C29H48O5	HMDB0039443	85.7457	46.5355	150.229	138.175	138.225	155.185	188.692	183.637	157.379	119.89	86.217	124.586	147.302	119.108	120.495	151.593	192.61	172.102	237.553	201.096	234.575	123.688	165.495	137.435	119.217	147.061	118.854	74.4472	109.765	96.355	132.359	69.0048
TN2320	(2E)-1-(4-hydroxy-3-methoxyphenyl)-3-phenylprop-2-en-1-one	C16H14O3	HMDB0135413	59.5565	167.865	55.3574	62.1664	54.6811	150.183	43.9577	99.0296	77.7961	146.358	76.2692	191.13	9.45918	155.963	83.5315	145.023	89.2273	177.507	46.0472	140.285	43.9193	89.7689	97.3234	118.007	205.204	62.6924	226.432	104.4	125.175	281.677	81.8031	241.875
RP707	(2E)-3-phenyl-1-[2,4,6-trihydroxy-3,5-bis(3-methylbut-2-en-1-yl)phenyl]prop-2-en-1-one	C25H28O4	HMDB0133049	104.06	98.824	104.49	109.832	99.259	97.626	108.517	104.192	110.021	107.425	125.638	109.493	113.195	148.531	110.236	105.587	121.267	126.291	129.083	124.682	134.384	144.421	149.171	144.212	124.798	123.616	127.308	122.53	134.309	155.617	157.003	135.926
TN135	(2E)-Butenoyl-CoA	C25H40N7O17P3S	HMDB0062466	43.8761	48.0181	45.6174	46.2838	35.4619	42.2258	44.1316	40.1276	49.1967	46.4927	39.2849	43.476	10.3192	43.6992	39.8626	44.1829	32.7649	31.1723	39.5005	29.0628	23.9362	25.0685	21.7682	20.6165	24.6043	29.3932	28.3003	29.8119	22.9429	31.1856	20.4003	18.4256
RP615	(2R,3R)-2-Amino-3-methylpentanoic acid	C6H13NO2	1530-1353-1573	5158.6	4037.89	6022.08	6379.56	5615.72	4980.88	5684.04	5486.32	6139.64	6883.97	7363.08	6184.64	5861.86	6519.82	6715.92	7058.03	7410.49	6979.08	7170.92	7950.55	8750.88	8203.36	8441.2	7851.35	9116.35	8427.5	7996.66	7739.74	7566.15	10583.9	10006.3	8981.96
RP1144	(2Z)-2-(phenylmethylidene)oct-7-enoic acid	C15H18O2	HMDB0134151	75.5871	48.0427	97.4389	107.846	69.9987	40.1608	121.046	80.5612	104.257	111.02	101.802	51.2966	77.6692	89.6077	78.4465	92.8827	105.089	64.1265	131.716	160.89	136.814	107.579	126.743	119.467	177.676	142.775	112	75.7304	128.279	119.535	140.949	117.498
RP1822	(2Z)-8-hydroxy-2-(phenylmethylidene)octanoic acid	C15H20O3	HMDB0134149	110.946	102.975	105.313	108.069	100.477	102.593	105.433	113.289	129.974	104.215	119.724	96.8178	100.462	95.5838	95.1968	129.799	115.154	109.593	106.03	101.217	110.3	120.113	115.472	115.924	123.664	97.8765	112.786	140.246	114.659	123.598	116.948	97.1616
RP2993	(3,4,5,6-tetrahydroxyoxan-2-yl)methyl acetate	C8H14O7	HMDB0125202	78.2182	71.875	80.7448	79.9597	77.9207	49.3668	36.9456	36.66	56.8987	43.6068	71.1661	62.9163	81.3831	54.3389	71.1141	71.5991	56.3638	38.5499	52.7424	77.1863	73.5706	90.7827	85.8537	74.6273	38.2955	43.8396	40.8655	73.1272	60.1823	66.7097	64.9794	57.9393
TN1087	(3a,5b)-24-oxo-24-[(2-sulfoethyl)amino]cholan-3-yl-b-D-Glucopyranosiduronic acid	C32H53NO11S	HMDB0002429	21.6785	20.2584	33.3416	30.5821	25.2806	26.0479	23.4301	28.2003	15.36	21.0022	28.4559	19.1065	5.2801	23.3984	18.2433	22.9871	25.8167	21.7697	14.568	25.0094	29.3628	19.1875	21.2997	25.3287	16.7365	14.0322	25.6958	8.34953	13.0506	17.6341	11.2744	7.99788
TN995	(3a,5b,7a)-23-Carboxy-7-hydroxy-24-norcholan-3-yl-b-D-Glucopyranosiduronic acid	C30H48O10	HMDB0002430	107.699	86.7669	118.237	99.277	88.4733	96.919	104.459	106.211	33.5327	45.6917	31.344	49.6528	16.7193	34.9246	21.8884	51.7238	61.6029	73.1987	63.2236	83.2535	82.7407	54.8976	69.1568	65.2292	40.2116	27.8352	48.078	19.6747	26.8624	28.8066	24.1481	25.803
RP3007	(3b,16a,20R)-25-Acetoxy-3,16,20,22-tetrahydroxy-5-cucurbiten-11-one 3-glucoside	C38H62O12	HMDB0035346	12.132	21.5732	25.4434	41.8058	26.1945	30.0908	28.0109	22.0569	75.6575	89.8829	75.3589	61.3012	64.6458	78.4542	81.1757	86.1277	30.9062	20.6904	15.1559	59.0036	20.9837	56.1105	11.4288	24.5344	45.2323	60.2557	33.3063	65.3983	82.532	79.7211	55.7527	57.0813
TN171	(3b,20R,22R)-3,20,27-Trihydroxy-1-oxowitha-5,24-dienolide 3-glucoside	C34H50O11	HMDB0033573	83.6071	79.369	79.2555	86.3073	92.3596	92.8987	93.8007	83.6794	69.5966	88.2247	73.6404	80.2146	55.0039	79.3225	66.744	60.9935	56.0957	67.3006	51.6076	57.7824	63.8231	77.6739	62.8739	73.3044	53.9515	48.8853	51.9436	62.4454	51.4708	60.9459	59.5921	71.5699
RP524	(3b,4b,11b,14b)-11-Ethoxy-3,4-epoxy-14-hydroxy-12-cyathen-15-al 14-xyloside	C27H42O8	HMDB0034617	441.221	305.853	473.263	384.119	395.037	413.049	398.278	433.964	375.344	343.415	270.217	325.958	354.358	332.844	313.171	380.505	288.188	307.143	337.698	342.661	355.317	252.625	322.33	250.309	275.967	243.578	280.887	193.801	255.899	244.501	244.641	246.414
RP761	(3b,6b,8a,12a)-8,12-Epoxy-7(11)-eremophilene-6,8,12-trimethoxy-3-ol	C18H30O5	HMDB0031963	203.563	202.602	205.863	220.015	207.345	203.665	209.946	199.653	227.529	249.216	263.975	223.265	224.197	232.781	232.777	227.282	233.914	240.151	238.225	258.145	271.849	270.269	263.011	268.895	247.964	247.399	249.512	238.308	240.733	264.948	279.084	264.28
RP1356	(3E)-2,3,4-trimethylhex-3-enal	C9H16O	HMDB0062671	231.043	219.698	230.943	212.375	229.039	224.297	224.964	222.316	227.132	223.202	220.793	227.946	223.588	223.468	217.305	227.898	230.184	221.219	238.547	233.979	231.383	233.18	243.367	237.294	218.191	221.281	225.791	237.278	220.432	215.081	226.695	225.186
TN859	(3R,5S)-1-pyrroline-3-hydroxy-5-carboxylic Acid	C5H7NO3	HMDB0062585	754.173	615.73	622.273	706.38	628.967	632.95	627.424	606.22	647.692	589.536	694.612	654.469	208.631	673.179	714.538	735.205	789.185	716.74	721.682	754.96	688.001	682.515	723.916	636.289	753.01	807.161	765.174	729.664	807.748	944.242	638.524	783.502
RP2576	(3R,7R)-1,3,7-Octanetriol	C8H18O3	HMDB0033625	238.07	234.499	229.837	225.184	220.979	234.538	228.27	237.657	222.419	234.461	219.318	234.96	222.777	237.803	228.269	221.581	222.427	220.598	227.491	223.688	224.065	228.731	235.833	219.673	212.272	214.004	218.474	221.745	222.625	222.588	225.257	213.644
TN850	(3S,5R,6R,6';S)-6,7-Didehydro-5,6-dihydro-3,5,6';-trihydroxy-13,14,20-trinor-3';-oxo-beta,epsilon-caroten-19';,11';-olide 3-acetate	C39H48O7	HMDB0037793	1.72594	116.574	79.787	110.196	117.487	118.319	117.187	175.546	151.965	165.826	145.227	141.799	208.399	9.34628	112.53	109.152	44.0779	45.5442	71.5156	51.9774	45.0784	18.0145	33.5896	43.3861	27.6425	38.1422	67.0492	60.8377	46.9665	68.725	100.956	60.6969
TN1269	(4-{3,5-dihydroxy-2,2-dimethyl-8-oxo-6-propyl-2H,3H,4H,8H-pyrano[3,2-g]chromen-10-yl}-4-oxobutoxy)sulfonic acid	C21H26O10S	HMDB0130113	94.0973	102.753	86.7776	116.714	81.4451	103.223	95.7841	110.084	79.1396	115.376	77.75	94.198	10.6078	106.374	79.5445	111.826	99.4984	100.878	58.6785	113.777	92.0828	105.107	111.107	107.239	111.397	94.4163	105.933	97.6731	87.2287	145.307	127.373	133.063
RP3045	(4-{5-hydroxy-8,8-dimethyl-2-oxo-2H,8H-pyrano[2,3-f]chromen-4-yl}phenyl)oxidanesulfonic acid	C20H16O8S	HMDB0126125	29.4801	134.215	100.348	65.237	41.1242	28.7104	60.6174	51.0349	31.0353	158.824	99.5117	32.8468	35.9813	164.169	50.4288	39.2826	60.1832	28.0557	28.3462	75.1732	49.8411	206.906	39.9571	48.0653	49.9594	41.7988	41.5303	42.7597	39.3296	46.8288	40.83	69.1165
RP1665	(4beta,5beta,6beta,14beta,15alpha,20S,22R)-5,6-Epoxy-4,14,15-trihydroxy-1-oxowitha-2,24-dienolide	C28H38O7	HMDB0033199	1418.83	1350.92	1738.26	1733.66	1707.97	1701.24	1529.27	1645.77	1328.62	1853.3	1478.87	1293.5	1344.02	1467.3	1261.4	1509.14	1427.7	1302.52	1494.04	1907.95	2069.12	1628.02	1533.32	1689.8	1368.88	1266.62	1530.05	959.413	1377.39	1437.26	1281.68	1297.86
RP3111	(4E)-1-(3,4-dihydroxy-5-methoxyphenyl)dec-4-en-3-one	C17H24O4	HMDB0137254	62.3748	73.598	95.0649	91.7148	84.337	88.5567	97.8659	97.2068	94.2798	97.2911	75.4485	81.4735	78.7799	72.0738	93.3324	70.6828	90.9576	123.09	162.325	188.405	159.232	116.247	157.406	189.679	110.957	65.7745	57.7547	64.1304	51.4649	58.6553	58.8003	64.371
TN471	(4E)-6-hydroxy-1-(4-hydroxy-3-methoxyphenyl)tetradec-4-en-3-one	C21H32O4	HMDB0137416	2.61449	2.60762	2.71873	3.1115	2.22732	2.58727	2.57899	2.69252	2.16031	3.17078	2.29392	3.00084	1.93612	1.82949	1.81824	2.22533	2154.42	2544.78	8.58095	2.65968	3.44847	2.84183	6.52604	128.856	2449.15	2774.55	2351.46	2596.9	1775.75	2333.96	2487.9	908.025
TN1584	(4R,5S,7R,11x)-11,12-Dihydroxy-1(10)-spirovetiven-2-one 12-glucoside	C21H34O8	HMDB0030895	129.6	88.7917	139.821	129.428	71.7613	109.346	130.129	118.27	114.995	100.263	123.697	92.767	10.7196	130.969	98.3438	165.759	141.354	126.77	89.9936	156.831	96.0006	106.813	104.875	98.7255	133.834	140.436	143.677	85.3242	171.01	193.461	116.346	99.7044
RP933	(4Z,7Z,9E,13Z,16Z,19Z)-11-Hydroperoxydocosahexaenoic acid	C22H32O4	HMDB0062285	56.7362	67.0216	135.046	81.3987	108.704	51.1039	64.8456	100.128	74.5225	103.981	92.5343	108.518	59.9487	49.5049	119.851	148.627	119.403	102.165	140.277	153.368	233.44	173.144	108.824	106.074	176.952	197.985	170.139	151.92	130.837	137.637	166.38	160.606
RP2140	(5,7-dihydroxy-6,8-dimethyl-2-phenyl-3,4-dihydro-2H-1-benzopyran-4-yl)oxidanesulfonic acid	C17H18O7S	HMDB0130599	83.5662	73.1406	90.35	90.787	85.482	129.447	103.974	86.6999	100.839	94.8516	93.6538	91.5512	92.5098	90.3283	132.61	96.6729	82.2893	83.073	145.272	88.448	76.23	86.2622	112.792	97.0003	80.5689	103.669	87.9553	127.641	72.9159	72.2856	80.3599	65.8194
TN1990	(5-{3,7-dihydroxy-4-[3,5,7-trihydroxy-2-(3-hydroxyphenyl)-3,4-dihydro-2H-1-benzopyran-8-yl]-3,4-dihydro-2H-1-benzopyran-2-yl}-2-hydroxyphenyl)oxidanesulfonic acid	C30H26O13S	HMDB0135106	117.84	153.753	152.607	123.3	144.684	79.5427	145.01	78.0539	156.679	95.0042	144.537	89.7351	102.82	116.867	178.758	105.763	157.79	97.6213	187.142	161.545	170.214	217.973	152.942	123.904	74.739	157.151	93.8095	180.733	115.061	119.739	153.316	117.005
TN422	(5alpha,6beta,14alpha,20R,22R)-5,6,14,20,27-Pentahydroxy-1-oxowith-24-enolide	C28H42O8	HMDB0033198	37.5929	38.8108	36.0104	33.2869	31.5678	33.0888	35.8513	33.1171	37.8309	34.4424	36.8574	34.232	24.4776	36.4398	34.5188	34.5935	31.8004	29.9258	33.3436	27.9848	8.0377	31.5873	10.1746	7.72592	34.0904	21.41	17.3103	13.0732	11.2648	20.9442	17.4216	18.6132
TN501	(6-{[5,7-dihydroxy-2-(3-hydroxyphenyl)-5H-chromen-3-yl]oxy}-4,5-dihydroxyoxan-3-yl)oxidanesulfonic acid	C20H19O12S	HMDB0127927	45.1308	62.2433	53.6242	54.507	44.8023	34.6089	48.0769	40.7209	35.8423	58.1003	30.9538	34.9677	17.138	38.2751	18.8974	27.2574	25.3526	18.2893	31.2664	38.6228	30.4092	35.5538	34.5432	24.8238	27.0968	25.499	22.8038	26.6606	20.8705	17.3154	17.1013	15.4126
RP2085	(6beta,22E)-6-Hydroxystigmasta-4,22-dien-3-one	C29H46O2	HMDB0039425	261.294	117.152	183.125	184.729	186.299	251.967	185.455	201.182	114.639	111.125	86.9999	98.8944	130.331	101.864	88.3364	104.57	166.332	205.363	332.721	228.785	261.601	104.537	166.249	161.817	123.135	102.221	120.027	31.9101	115.44	77.5428	100.793	86.7168
RP3374	(6-carboxy-3,4,5-trihydroxyoxan-2-yl)[3,5-dihydroxy-2-(3,4,5-trihydroxyphenyl)-7H-chromen-7-ylidene]oxidanium	C21H19O13	HMDB0130420	48.5213	24.0971	31.0207	24.1809	31.6329	34.5339	26.9754	33.7558	29.1352	39.933	42.724	38.335	40.8057	18.4102	24.3713	41.1061	29.4686	67.6419	50.8028	39.6594	42.3584	29.7933	29.3987	24.3877	32.9241	35.5476	51.9663	28.5504	52.9243	31.0307	31.5878	43.0003
RP263	(6E,8S,10Z)-8-hydroxy-3-oxohexadecadienoic acid	C16H26O4	HMDB0062366	7.29956	11.8435	11.1199	12.0558	13.9384	11.5896	14.3749	12.8274	11.8968	14.9239	10.9686	12.3556	10.8694	12.0983	11.8805	12.5014	160.55	183.713	202.907	239.65	206.136	203.597	188.64	225.882	164.223	164.823	215.69	195.995	135.903	150.857	168.078	170.011
TN1632	(7';R)-(+)-Lyoniresinol 9';-glucoside	C28H38O13	HMDB0038922	302.761	429.273	130.672	230.509	197.68	153.026	313.504	154.878	517.117	171.299	461.436	298.622	114.821	223.179	178.055	249.046	168.384	190.471	194.08	211.423	199.313	186.351	206.371	156.969	278.255	248.857	160.424	444.805	478.485	281.007	97.51	136.123
RP3452	(7-hydroxy-5-methoxy-6,8-dimethyl-2-phenyl-3,4-dihydro-2H-1-benzopyran-4-yl)oxidanesulfonic acid	C18H20O7S	HMDB0130655	88.0121	36.8135	149.683	116.865	171.883	90.8487	197.827	121.633	185.603	150.877	151.737	40.2491	123.517	91.7663	191.729	185.446	132.003	132.816	125.129	138.155	99.9666	123.288	144.034	117.712	202.922	202.672	164.501	161.391	83.921	93.9319	99.1672	105.558
TN481	(8';R)-Neochrome	C41H58O3	HMDB0030100	37.8595	38.9279	32.0773	34.3812	33.7237	35.9193	34.4739	32.8848	38.3997	33.4608	36.5378	32.4363	32.134	35.0882	33.3649	31.9662	31.811	27.9375	26.9714	34.0725	32.9905	31.3635	27.7028	28.587	30.7566	32.1835	33.2979	33.9777	28.3968	31.5812	29.9199	29.3214
RP1151	(8E,15E)-1,8,15-Heptadecatriene-11,13-diyne	C17H22	HMDB0031041	219.036	240.912	232.078	232.133	218.489	214.163	234.235	196.258	213.031	200.173	221.471	206.701	252.881	217.08	245.477	231.925	253.87	239.327	227.837	215.164	240.561	245.321	227.144	271.686	232.074	244.084	236.816	208.35	250.78	232.601	256.489	264.53
TN1199	(9E)-10-nitrooctadecenoic Acid	C18H33NO4	HMDB0062737	48.5972	31.2067	33.9814	30.5317	23.7982	44.7548	49.0581	39.6683	15.6307	9.38966	12.6706	28.8211	4.98981	12.4497	11.0036	15.8572	56.3487	52.7655	93.7026	30.8362	31.6066	30.9217	62.132	98.39	24.3498	52.4916	69.9552	58.3138	45.1143	25.3223	19.4901	21.8279
RP908	(9Z,11E,13E,15Z)-4-Oxo-9,11,13,15-octadecatetraenoic acid	C18H26O3	HMDB0031098	29.7494	121.366	94.0154	85.5594	85.6271	66.8066	90.2705	98.4355	111.246	56.1207	51.0984	48.9295	66.4066	60.7232	52.7923	38.7389	14.759	64.9097	70.9524	40.2035	59.2752	54.9354	38.0532	72.4788	53.7655	41.5351	28.4019	33.3073	31.6082	28.0861	28.9935	35.7042
TN1846	(beta-1-O-[N-(2-formyl-3-chlorophenyl)anthraniloyl]-D-glucupyranuronic acid)	C20H18ClNO9	HMDB0060032	104.054	80.9735	83.4484	78.2533	77.9516	80.23	92.0027	74.8057	91.301	76.5481	80.3764	77.4429	43.4426	81.6215	82.0002	79.3231	77.1722	87.6	82.6027	71.2089	76.2512	69.9363	84.1163	79.0428	89.0726	90.7652	86.0659	73.268	81.3107	85.1968	88.6699	81.809
RP3262	(beta-1-O-[N-(2-hydroxymethyl-3-chlorophenyl)anthraniloyl]-D-glucupyranuronic acid)	C20H20ClNO10	HMDB0060034	41.6626	59.1383	48.1821	51.8517	39.8679	29.718	19.4572	21.1869	25.9563	39.6315	35.3477	52.4779	60.8112	50.5459	60.5657	47.9924	51.1429	20.4264	27.7355	35.684	51.0911	94.353	54.3586	47.6703	34.962	22.0661	16.8611	41.6809	26.0813	44.0953	54.1054	47.9232
TN2118	(E)-but-2-enoyl-CoA	C25H40N7O17P3S	HMDB0059627	14.5693	44.001	22.2606	28.8376	17.1448	27.795	16.2469	32.5214	21.0377	56.5739	19.0768	30.853	2.62028	47.0037	18.3465	33.2464	27.2529	28.9262	35.5291	28.1729	23.921	32.8509	16.6401	32.5491	29.3334	34.2235	27.8772	42.7873	31.2965	29.345	16.7544	30.4739
TN2308	(gamma-Glutamyl-gamma-glutamyl)-S-methylcysteine	C14H23N3O8S	HMDB0039424	66.1246	115.105	124.2	32.9645	75.2265	80.6641	63.5331	37.2345	57.683	127.535	119.125	43.9326	23.7483	149.937	92.1967	47.8484	28.4021	63.8179	40.2928	136.441	58.122	117.698	48.0147	38.7453	56.432	62.1391	55.4365	60.2475	50.7363	70.7499	67.7184	53.0373
TN1581	(R)-2,3-Dihydro-3,5-dihydroxy-2-oxo-3-indoleacetic acid	C10H9NO5	HMDB0038941	22.5603	10.2769	11.2481	16.0429	16.8303	19.6262	13.4169	16.5562	11.6893	8.68453	14.8264	20.8885	5.95911	13.8314	13.1957	10.5028	13.1842	11.6097	20.962	15.8614	11.2806	14.7476	11.2737	18.2144	8.93829	13.3991	10.7297	17.4665	13.6504	9.23365	6.22641	11.299
TN2559	(R)-2-Hydroxy-7,8-dimethoxy-2H-1,4-benzoxazin-3(4H)-one 2-glucoside	C16H21NO10	HMDB0037262	55.1232	78.3623	39.6822	33.6129	66.0143	65.6529	31.111	42.5054	54.1959	35.1829	54.7627	59.39	36.2386	42.2157	70.5265	46.6126	41.377	76.4631	36.4352	41.3846	40.3987	38.4853	40.653	43.7019	54.881	66.3364	62.1954	59.6272	71.3971	63.5042	54.0687	56.8964
TN2581	(R)-3,4-Dihydro-2-(4,8,12-trimethyl-3,7,11-tridecatrienyl)-2H-1-benzopyran-6-ol	C25H36O2	HMDB0036013	11.4545	5.62641	13.0134	10.7382	8.84928	11.7868	11.5578	12.4225	17.3987	9.04039	16.0453	18.4858	20.4015	10.7065	15.1115	13.7295	7.80497	7.76555	14.3965	5.00686	99.9019	9.67527	6.73835	5.98432	7.77803	10.2801	10.2051	5.40601	23.9984	15.0716	8.41282	3.82935
TN875	(R)-3,4-Dihydro-2-methyl-2-(4,8,12-trimethyl-3,7,11-tridecatrienyl)-2H-1-benzopyran-6-ol	C26H38O2	HMDB0036368	84.7037	81.5431	212.888	106.286	177.261	65.9837	93.3235	166.637	128.059	182.089	165.539	179.257	28.4961	78.3677	182.751	222.068	54.8983	74.9272	96.8661	50.4833	196.556	97.9062	57.4877	72.5566	136.015	137.206	83.6739	82.882	77.3085	83.6541	120.979	173.143
RP2395	(R)-3-hydroxybutyrylcarnitine	C11H21NO5	HMDB0062735	310.315	478.501	142.387	131.74	378.088	222.855	57.9128	83.2084	189.215	162.163	323.822	398.037	736.608	285.246	288.292	183.772	131.212	220.765	421.432	149.535	239.474	290.465	287.911	191.472	166.704	114.133	105.813	341.49	368.358	179.668	165.177	303.652
TN2123	(R)-Rutaretin 1';-(6';';-sinapoylglucoside)	C31H34O14	HMDB0039041	39.0004	32.7191	39.0442	28.6581	30.9309	12.6279	39.7088	26.9496	34.4168	31.0015	40.1576	32.2876	11.4373	31.5179	25.9534	28.6989	24.6727	26.4699	27.637	21.6156	30.8944	23.5306	32.4974	26.8985	32.0477	32.1194	20.5235	28.2467	20.4386	32.0123	45.1005	28.5009
RP2873	(R)-Skyrin 2-xyloside	C35H26O14	HMDB0036319	17.4668	31.3324	23.8486	25.6492	18.9528	27.5801	24.409	19.4688	22.0927	31.511	26.6704	27.0585	20.0259	29.2316	38.6243	21.6889	33.9397	18.6867	23.3897	26.563	28.7545	58.7377	41.4388	24.5854	29.2147	20.2201	19.8165	43.4429	15.728	24.7487	28.7741	22.2626
TN2447	(S)-3-Hydroxytetradecanoyl-CoA	C35H62N7O18P3S	HMDB0003934	68.2006	71.9251	18.6609	56.7785	61.2998	64.0838	36.4623	60.2085	70.5498	43.5056	27.3821	62.939	64.6983	27.4914	39.3981	61.5681	61.7752	57.6516	63.3686	26.9774	50.5022	55.6914	62.9737	57.325	59.8104	61.8885	64.7241	60.6073	58.2146	47.6033	62.6057	60.4839
RP2091	(S)C(S)S-S-Methylcysteine sulfoxide	C4H9NO3S	HMDB0029432	8.46822	7.27685	7.15108	9.15912	8.42159	9.03225	9.91672	9.48228	10.3415	9.83489	9.84412	9.82432	8.35067	9.04808	10.0872	10.1348	9.83231	7.33964	9.40895	8.05334	8.17958	6.46074	8.18308	9.25807	8.2837	8.44665	5.88591	6.88286	7.7395	7.22173	7.22623	7.44103
TN1903	(S)-Hydroxyoctanoyl-CoA	C29H50N7O18P3S	HMDB0003940	9.71714	8.53531	16.1546	15.3723	25.7982	5.08719	17.6726	7.44695	20.5017	5.87085	25.8532	6.54439	2.01362	10.7861	38.663	8.20882	28.5746	7.8932	20.3509	23.7966	7.04725	27.3468	12.7623	8.98926	6.11951	23.6603	12.9254	11.6381	10.5258	7.65988	1.38424	9.71319
RP2490	(S)-Menthone 8-thioacetate	C12H20O2S	HMDB0037386	117.427	109.292	156.716	198.476	146.53	100.337	164.923	128.802	136.213	173.729	151.368	31.1325	111.074	125.164	125.118	123.356	155.784	142.155	127.843	227.257	183.931	198.366	194.937	168.009	177.518	183.288	162.077	37.5903	236.881	199.501	210.705	36.2056
RP140	(S)-Reticuline	C19H23NO4	HMDB0003601	292.344	215.488	327.816	270.926	270.246	214.868	255.7	269.385	181.095	238.781	180.408	215.634	194.842	201.059	170.522	199.891	73.6986	74.9561	93.1766	60.1903	58.5371	44.4888	57.1827	47.939	46.4164	36.665	40.3317	20.1622	23.2406	32.6653	38.9053	25.383
RP678	(Z)-1-(Methylthio)-5-phenyl-1-penten-3-yne	C12H12S	HMDB0032688	186.606	160.403	243.237	240.905	226.637	196.712	233.98	228.043	276.561	309.463	313.942	253.859	270.455	279.485	320.147	319.971	312.645	276.802	277.307	363.711	421.196	383.179	379.391	331.753	393.142	392.178	362.875	337.632	295.366	503.338	477.789	421.188
RP2604	(Z)-1,3-Octadiene	C8H12	HMDB0061897	69.1428	96.7921	61.0184	107.034	86.5775	95.6269	73.1713	66.1202	139.357	138.182	147.014	195.953	128.371	146.458	122.584	145.071	76.6754	38.3954	62.4605	72.2022	78.4266	98.0205	48.2156	58.8895	130.633	119.514	95.3414	152.133	209.45	167.469	139.179	104.182
RP877	(Z)-2,4-Dihydroxy-6-(8-pentadecenyl)benzoic acid	C22H34O4	HMDB0039226	76.1566	60.292	112.492	106.08	79.7989	84.67	95.4738	80.9908	121.445	115.543	140.316	98.886	97.8714	113.36	135.502	135.428	140.423	122.723	112.247	143.073	160.12	138.523	134.141	127.316	152.777	136.144	157.192	119.303	132.61	150.954	146.683	110.035
RP2986	(Z)-3-Methyl-3-decen-1-ol	C11H22O	HMDB0031064	161.883	256.111	159.003	298.932	247.95	259.5	227.55	202.141	469.052	454.253	511.653	531.993	405.375	455.206	458.402	427.293	174.337	104.38	180.187	240.607	215.208	277.052	137.155	162.616	389.557	363.055	289.749	391.047	594.246	446.484	409.124	349.494
TN245	(Z)-5-[(5-Methyl-2-thienyl)methylene]-2(5H)-furanone	C10H8O2S	HMDB0033845	274.758	266.146	239.196	252.75	242.051	252.945	241.454	267.763	237.218	255.806	246.128	260.189	261.686	236.682	242.442	249.072	261.637	268.634	256.428	285.869	267.727	280.761	286.03	289.896	249.1	283.625	269.285	273.965	277.942	293.385	288.142	264.705
RP2482	(Z)-Resveratrol 3,4';-diglucoside	C26H32O13	HMDB0039910	149.626	170.527	62.4218	162.454	117.831	82.3053	130.907	84.9919	128.521	85.9433	154.681	89.2022	133.197	105.926	70.0156	97.5792	97.991	70.7118	96.0135	122.192	120.094	113.779	114.86	105.764	290.673	68.9175	81.582	136.233	156.458	86.0613	49.7163	75.0551
RP1124	(Z,Z)-2,9,16-Heptadecatriene-4,6-diyn-8-ol	C17H22O	HMDB0032674	52.2927	44.7582	44.9991	46.756	52.9368	32.0902	54.0377	50.9282	53.7625	69.7478	82.6692	85.266	91.0418	82.664	109.203	34.7989	130.228	58.9944	54.088	68.105	59.3188	72.8197	97.5169	56.9724	56.5615	130.102	98.9584	85.7828	99.3624	164.504	132.837	101.269
TN922	[(1S,16R)-5,7-dihydroxy-8,8,10,12,16-pentamethyl-3-[1-(2-methyl-1,3-thiazol-4-yl)prop-1-en-2-yl]-9-oxo-17-oxa-4-azabicyclo[14.1.0]heptadec-4-en-11-yl]oxidanesulfonic acid	C27H42N2O8S2	HMDB0127540	18.3727	28.09	37.9845	67.6402	28.5275	19.397	48.1231	49.135	30.5365	6.88272	62.2601	7.74275	4.53834	17.6179	17.4335	55.7413	9.60145	7.19253	29.6855	16.0014	28.9172	11.9267	9.0489	12.5265	86.9098	9.75279	24.1606	18.9659	43.8082	18.7452	11.0844	14.1218
RP2608	[(2-{2-[2-(2,4-dihydroxyphenyl)-5,7-dihydroxy-6-(3-methylbut-2-en-1-yl)-4-oxo-3,4-dihydro-2H-1-benzopyran-3-yl]ethylidene}-6-methylhept-5-en-1-yl)oxy]sulfonic acid	C30H36O10S	HMDB0129802	33.4016	15.4037	26.0029	36.8104	22.3107	15.2697	19.9636	23.597	31.0094	15.5149	49.9647	21.4283	47.336	22.3231	22.7855	31.6634	40.3781	16.9877	34.7212	47.2561	35.5304	18.7522	18.1292	41.435	50.2168	17.5338	15.7547	31.6006	18.2878	20.6275	13.2056	14.6727
RP1412	[(3-oxo-1,7-diphenylhept-4-en-2-yl)oxy]sulfonic acid	C19H20O5S	HMDB0134652	66.3214	87.0716	87.9045	77.918	67.6412	63.9337	69.9384	71.3851	49.069	88.1023	61.1233	64.7415	55.9437	84.5127	54.928	59.0869	55.0786	48.7358	48.7304	59.6891	82.5716	68.1911	35.5562	71.1587	51.6941	35.048	42.484	59.2522	41.6372	65.6496	35.0646	66.4591
TN2464	[(6-{[5,7-dihydroxy-2-(4-oxocyclohexa-2,5-dien-1-ylidene)-2H-chromen-3-yl]oxy}-3,4,5-trihydroxyoxan-2-yl)methyl][1-hydroxy-3-(4-hydroxy-3-methoxyphenyl)prop-2-en-1-ylidene]oxidanium	C31H29O13	HMDB0125100	36.9514	33.7238	47.1317	35.5611	67.1757	20.1758	68.0984	25.1551	101.406	35.2246	60.1727	26.1188	39.8998	29.9267	84.6652	24.9217	55.8567	21.7904	74.0052	41.4996	80.1328	77.0499	62.976	51.7501	32.4553	75.8647	25.9312	49.8879	57.2599	37.6046	75.0478	41.2092
TN1011	[(6-{5,7-dihydroxy-4-oxo-2-phenyl-6-[3,4,5-trihydroxy-6-(hydroxymethyl)oxan-2-yl]-3,4-dihydro-2H-1-benzopyran-8-yl}-3,4,5-trihydroxyoxan-2-yl)methoxy]sulfonic acid	C27H32O17S	HMDB0126875	123.554	41.0818	374.974	69.9621	158.325	33.9699	343.209	35.7194	92.9159	68.3731	116.404	23.0855	27.2485	64.2503	101.589	28.6965	21.1826	14.0333	33.7125	165.387	99.1464	10.5046	36.3155	17.6399	10.3457	46.0436	23.5115	56.7668	92.3176	74.9121	167.332	56.8006
TN1603	[(7-hydroxy-5-methoxy-8-methyl-4-oxo-2-phenyl-3,4-dihydro-2H-1-benzopyran-6-yl)methoxy]sulfonic acid	C18H18O8S	HMDB0130646	215.429	53.2285	185.085	478.173	192.551	103.152	218.632	197.267	97.772	80.3864	153.45	96.3257	56.4016	256.558	205.415	115.468	236.974	173.787	68.4257	293.632	344.35	247.975	165.036	190.509	249.275	105.822	170.651	117.341	118.78	111.399	89.0856	180.376
TN2474	[1-(3-hydroxyphenyl)-2-oxo-2-phenylethoxy]sulfonic acid	C14H12O6S	HMDB0135205	184.426	160.784	186.005	124.464	220.075	172.32	148.988	128.751	187.841	176.139	173.018	118.014	118.205	115.808	165.713	121.437	145.933	170.684	169.723	193.862	157.973	124.816	189.733	164.549	118.392	209.642	173.514	246.672	135.991	149.57	160.88	179.308
RP3218	[2-(5,7-dihydroxy-4-oxo-2-phenyl-4H-chromen-8-yl)-4,5-dihydroxyoxan-3-yl]oxidanesulfonic acid	C20H18O11S	HMDB0127265	151.093	170.982	137.168	116.077	141.318	92.9674	84.5982	70.008	84.0307	193.424	130.492	153.315	188.087	121.671	146.772	135.696	149.005	77.5866	86.0823	223.367	161.247	188.759	143.523	166.23	89.599	51.9401	48.1233	98.1149	99.9973	131.135	133.006	152.75
TN1214	[2-hydroxy-5-(3,5,7-trihydroxy-5H-chromen-2-yl)phenyl]oxidanesulfonic acid	C15H11O9S	HMDB0127940	51.3467	94.0745	37.4554	48.2322	41.82	101.473	45.2057	76.9499	42.5248	86.4819	55.7967	78.4226	62.8226	71.6693	48.9703	69.4176	41.3274	67.0481	34.2166	33.6503	50.2547	30.1199	53.2672	40.6684	89.9241	46.9821	47.0228	53.0937	38.0192	53.811	42.6232	44.9333
RP3331	[2-hydroxy-6-methoxy-4-(3,5,7-trihydroxy-5H-chromen-2-yl)phenyl]oxidanesulfonic acid	C16H13O10S	HMDB0128140	83.3664	83.1705	45.5406	28.1087	106.511	89.8504	63.5169	62.9273	93.2937	33.6653	58.5986	109.681	90.1006	41.0486	83.9553	74.7428	60.2288	99.7566	60.547	37.0495	61.8902	19.573	71.0833	67.0358	98.1563	87.7841	90.4875	81.5921	76.9351	67.8257	87.9822	72.7023
TN1277	[2-methoxy-4-(3,5,6,7-tetrahydroxy-8aH-chromen-2-yl)phenyl]oxidanesulfonic acid	C16H13O10S	HMDB0128127	91.7223	41.2918	136.484	51.6664	85.7805	45.6123	121.535	47.6977	70.041	61.6604	74.0374	38.691	25.2823	57.954	70.6871	29.8893	35.996	29.3775	40.322	109.497	62.2406	21.63	52.2605	29.2227	27.3228	48.8733	56.2856	46.0851	77.6188	71.2792	84.2667	55.2343
TN794	[2-methoxy-4-(3,5,7-trihydroxy-5H-chromen-2-yl)phenyl]oxidanesulfonic acid	C16H13O9S	HMDB0128122	107.225	72.9835	68.6	66.5966	75.6223	75.748	65.5671	59.4473	81.7412	55.7403	72.0355	69.1429	38.0556	68.7869	70.5619	71.4407	96.9332	93.0244	83.0967	79.5113	80.7935	78.3308	75.1476	75.7222	94.1116	95.4561	83.8292	102.67	143.578	80.8578	91.4283	84.9681
TN1389	[3-(2H-1,3-benzodioxol-5-yl)-1-(4-methoxy-1-benzofuran-5-yl)-3-oxopropoxy]sulfonic acid	C19H16O9S	HMDB0129396	527.254	582.565	769.337	327.484	510.152	343.029	749.313	347.268	458.478	440.443	470.496	289.932	186.722	389.85	456.012	230.213	289.057	374.217	310.268	756.322	407.413	193.345	414.654	397.982	231.59	360.501	443.036	356.068	459.708	482.412	502.924	416.071
TN2283	[3-(3,4-dihydroxyphenyl)-1-hydroxyprop-2-en-1-ylidene][(6-{[2-(3,4-dihydroxyphenyl)-7-hydroxy-5-oxo-5H-chromen-3-yl]oxy}-3,4,5-trihydroxyoxan-2-yl)methyl]oxidanium	C30H27O14	HMDB0125178	718.536	818.364	952.687	785.07	869.404	464.929	957.157	507.982	1056.95	526.607	988.889	518.224	636.883	698.505	1049.74	623.316	866.985	498.112	1044.77	865.195	935.598	1128.26	833.537	758.768	387.404	869.528	452.916	939.25	622.507	678.749	881.909	636.275
RP229	[3-(3,5,7-trihydroxy-4-oxo-4H-chromen-2-yl)phenyl]oxidanesulfonic acid	C15H10O9S	HMDB0125276	5.13629	3.77783	3.26109	3.09899	5.46529	5.4579	8.96944	8.30774	9.2182	4.77686	6.5814	8.42559	8.26075	8.97636	9.46561	17.9318	122.545	127.882	143.746	176.801	165.574	139.269	138.273	203.084	137.625	135.576	172.233	190.531	111.353	141.72	179.942	158.922
RP2937	[3-(3-{[3,4-dihydroxy-5-(hydroxymethyl)oxolan-2-yl]oxy}-5,7-dihydroxy-4-oxo-3,4-dihydro-2H-1-benzopyran-2-yl)phenyl]oxidanesulfonic acid	C20H20O13S	HMDB0132752	268.536	299.997	191.683	92.4776	403.224	345.778	208.766	186.448	276.484	168.643	190.804	315.738	427.698	210.013	369.047	210.279	157.936	299.659	189.53	146.804	212.056	139.319	231.764	163.757	252.635	259.51	379.255	299.054	237.367	307.78	351.898	299.913
TN2666	[3-(4-{8-[3,7-dihydroxy-2-(3-hydroxyphenyl)-3,4-dihydro-2H-1-benzopyran-4-yl]-3,5,7-trihydroxy-2-(3-hydroxyphenyl)-3,4-dihydro-2H-1-benzopyran-6-yl}-3,7-dihydroxy-3,4-dihydro-2H-1-benzopyran-2-yl)phenyl]oxidanesulfonic acid	C45H38O16S	HMDB0135057	11.4266	12.8426	11.7819	7.39652	9.23727	7.29353	11.101	6.91018	8.1643	7.28727	12.9845	7.46827	3.64402	9.44923	11.8502	9.80893	7.73225	7.89664	9.31945	10.0236	10.0101	7.93092	9.17266	9.96574	14.0246	12.2569	8.11042	11.6585	8.38577	11.0977	11.8731	7.01675
RP1724	[4-(5,7-dihydroxy-3-{[3,4,5-trihydroxy-6-(hydroxymethyl)oxan-2-yl]oxy}-5H-chromen-2-yl)-2-methoxyphenyl]oxidanesulfonic acid	C22H23O14S	HMDB0128118	54.0616	15.1076	118.777	23.7299	30.3144	24.9621	28.175	32.4321	31.2057	71.0463	13.4218	13.8739	15.2526	111.182	46.7584	24.3917	23.1732	23.2817	22.6938	14.3227	21.1559	14.8822	14.3394	15.2411	23.8335	14.9256	19.8558	18.6609	20.4845	17.0459	27.1199	19.0765
RP2972	[4-(5-hydroxy-7-methoxy-8-methyl-4-oxo-4H-chromen-3-yl)-2-methoxyphenyl]oxidanesulfonic acid	C18H16O9S	HMDB0129590	158.905	131.16	199.789	190.755	185.969	195.897	230.862	227.244	251.806	161.282	231.514	168.553	212.265	139.086	225.155	213.925	235.356	214.363	244.205	180.786	213.155	218.095	204.72	194.354	216.555	253.141	216.464	303.409	191.035	174.906	190.882	141.448
RP1735	[4,5-dihydroxy-6-(hydroxymethyl)-2-[3,5,6,7-tetrahydroxy-2-(3-hydroxyphenyl)-3,4-dihydro-2H-1-benzopyran-8-yl]oxan-3-yl]oxidanesulfonic acid	C21H24O14S	HMDB0126744	56.1933	26.7474	57.3683	57.2795	71.6963	49.737	49.0625	49.4163	26.9103	58.4113	28.4514	25.4861	29.2023	64.7277	57.1025	33.9745	65.3081	67.959	72.4991	111.34	77.911	79.2865	71.7493	86.3655	41.3813	70.9735	55.951	24.6469	90.4862	126.106	106.362	105.446
TN1337	[5-(5,7-dihydroxy-6-{4-hydroxy-6-methyl-5-oxo-3-[(3,4,5-trihydroxy-6-methyloxan-2-yl)oxy]oxan-2-yl}-4-oxo-4H-chromen-2-yl)-2-hydroxyphenyl]oxidanesulfonic acid	C27H28O17S	HMDB0127314	8.44772	63.4243	67.9369	56.6171	19.296	4.21565	61.7723	38.739	7.89365	110.386	79.8505	22.537	12.4716	102.534	61.444	15.0774	2.17038	0.802793	2.20527	74.0783	31.1934	64.0143	7.86689	26.5517	1.68563	1.47948	1.98491	3.53423	3.1937	42.0347	6.4059	51.2836
RP139	[6]-Gingerdiol 3,5-diacetate	C21H32O6	HMDB0040568	45.4155	311.136	281.6	331.66	317.721	314.525	311.64	304.53	329.92	319.502	268.646	281.769	329.584	295.201	270.249	247.25	125.806	146.445	169.209	176.854	129.69	125.878	95.14	156.766	91.3879	118.928	101.302	83.7821	69.9745	58.9485	72.1622	74.8506
TN251	[6]-Gingerdiol 5-O-beta-D-glucopyranoside	C23H38O9	HMDB0036123	63.8765	47.1575	81.1522	76.4559	70.21	59.3758	50.3689	50.5452	51.4914	82.9671	47.1742	57.351	24.6853	79.5046	54.6254	63.0403	78.4405	90.4478	82.0128	117.203	101.832	81.9326	86.7098	80.2821	100.714	107.489	98.2782	110.059	109.207	96.689	98.0313	74.3899
RP2928	[7-(2,4-dihydroxyphenyl)-5-methoxy-2,2-dimethyl-8-oxo-2H,3H,4H,8H-pyrano[3,2-g]chromen-3-yl]oxidanesulfonic acid	C21H20O10S	HMDB0125583	13.6037	92.2945	93.4707	138.368	60.856	24.3199	93.9531	48.0704	44.1666	103.049	279.476	43.5038	142.608	131.607	154.885	105.338	170.499	18.3696	10.3422	53.0279	188.356	292.644	77.7633	67.4527	143.354	134.232	44.1187	119.072	27.7967	137.425	127.794	71.2695
TN2386	{[(3E)-2-oxo-4-phenylbut-3-en-1-yl]oxy}sulfonic acid	C10H10O5S	HMDB0133757	241.158	253.462	209.576	214.423	227.038	228.556	244.805	208.681	238.715	245.079	221.421	241.25	213.592	208.582	228.789	219.776	237.904	219.158	197.242	235.286	207.398	231.577	218.342	215.765	198.701	214.031	224.092	216.253	229.797	244.208	253.213	248.082
RP3048	{[1-(3-hydroxy-4-methoxyphenyl)-3-(2,4,6-trihydroxyphenyl)propan-2-yl]oxy}sulfonic acid	C16H18O9S	HMDB0127836	115.167	88.2618	101.606	97.2985	106.127	81.5614	106.466	111.573	89.0661	61.6262	68.2487	155.668	117.058	79.9781	67.9091	86.7035	113.58	128.436	155.125	84.4494	91.3966	81.2294	107.455	86.667	88.714	71.6798	77.0772	48.5826	136.062	83.6044	88.1284	68.3128
TN2438	{[1-(4-hydroxy-3-methoxyphenyl)-3-(2,4,6-trihydroxyphenyl)propan-2-yl]oxy}sulfonic acid	C16H18O9S	HMDB0127774	39.9655	116.337	132.186	184.974	43.4448	85.768	91.9018	129.816	27.4244	119.923	187.536	95.4629	33.1172	192.418	130.953	92.9687	92.7057	24.7115	55.9107	196.513	121.986	176.313	40.1757	129.324	30.1443	44.2089	29.8138	33.8758	67.9855	152.282	39.0622	168.037
TN2625	{[1-hydroxy-1-(7-hydroxy-1-oxo-1H-isochromen-3-yl)butan-2-yl]oxy}sulfonic acid	C13H14O8S	HMDB0130072	80.6137	82.1588	64.6836	69.7234	76.0503	72.9813	79.8512	77.3474	82.6591	79.3294	83.9442	78.9467	65.0081	73.4058	70.8219	73.1602	70.4843	69.7011	73.0221	63.2623	69.479	69.8895	75.9971	74.6453	76.5703	79.8639	69.4413	66.4453	72.2024	76.3792	78.231	73.1979
TN2446	{10-butanoyl-5-hydroxy-2,2-dimethyl-8-oxo-6-propyl-2H,3H,4H,8H-pyrano[3,2-g]chromen-3-yl}oxidanesulfonic acid	C21H26O9S	HMDB0130102	43.536	61.6418	54.8507	51.5186	54.0366	40.8225	40.0565	34.4166	56.7256	64.8911	61.0256	50.7008	16.4734	51.2223	53.5106	39.4001	30.4821	27.4783	30.7425	60.2833	46.2277	51.3215	46.0811	42.8158	50.7807	56.2329	46.4131	69.5278	54.9655	79.8179	59.764	54.9091
RP1147	{2,6-dimethoxy-4-[3-oxo-3-(2,4,6-trihydroxyphenyl)prop-1-en-1-yl]phenyl}oxidanesulfonic acid	C17H16O10S	HMDB0124891	60.0332	53.4873	56.3138	73.3568	63.5045	64.4117	78.5045	53.7088	65.6107	67.1291	70.963	52.7964	51.3713	77.6931	68.267	68.0009	95.9954	72.4761	80.8754	65.3555	68.6237	85.1094	78.4373	73.2186	114.872	97.4795	66.5638	66.8628	45.2635	57.5855	64.3907	72.0231
TN1628	{2-[2-(3,4-dihydroxyphenyl)-5-hydroxy-4-oxo-6-[3,4,5-trihydroxy-6-(hydroxymethyl)oxan-2-yl]-7-[(3,4,5-trihydroxy-6-methyloxan-2-yl)oxy]-4H-chromen-8-yl]-4,5-dihydroxy-6-(hydroxymethyl)oxan-3-yl}oxidanesulfonic acid	C33H40O23S	HMDB0126981	37.977	30.8069	42.1528	35.1302	44.0033	17.8506	43.132	18.3016	47.6763	33.5557	53.5707	20.3357	32.5159	48.3825	38.9279	20.2504	40.6605	25.4703	46.3636	39.3853	58.3271	50.2382	52.2685	45.5614	46.1429	57.0885	20.9482	51.5277	28.9431	48.0568	44.3038	47.2397
RP2147	{2-[2-(acetyloxy)propan-2-yl]-6-(2-methylbut-3-en-2-yl)-7-oxo-2H,3H,7H-furo[3,2-g]chromen-3-yl}oxidanesulfonic acid	C21H24O9S	HMDB0130305	123.797	899.29	1589.69	932.633	360.225	100.768	674.356	476.769	142.5	1334.15	1603.33	383.926	861.491	1420.83	1139.75	299.749	32.4258	4.10311	3.24924	1172.94	658.945	1430.61	160.447	617.523	36.1227	8.79476	14.4339	50.9239	17.9655	753.339	137.269	1081.63
RP1774	{2-[5,7-dihydroxy-2-(3-hydroxyphenyl)-4-oxo-4H-chromen-8-yl]-3,5-dihydroxyoxan-4-yl}oxidanesulfonic acid	C20H18O12S	HMDB0127306	525.832	356.695	430.876	503.995	341.165	319.124	585.54	491.286	608.589	435.028	455.307	551.222	436.063	409.8	434.992	489.68	697.439	420.087	638.747	460.779	563.044	602.033	695.674	440.977	571.662	617.486	569.568	559.22	234.669	336.673	419.997	299.485
TN1183	{2-[5,7-dihydroxy-2-(3-hydroxyphenyl)-4-oxo-8-(3,4,5-trihydroxyoxan-2-yl)-4H-chromen-6-yl]-4,5-dihydroxy-6-(hydroxymethyl)oxan-3-yl}oxidanesulfonic acid	C26H28O17S	HMDB0126921	32.7492	39.2752	38.259	37.3327	36.6177	36.1194	36.271	45.0564	41.2232	45.6547	48.4629	37.2792	15.393	47.3212	41.091	45.1173	43.4335	40.0804	36.4241	40.6879	46.3791	49.0915	45.5129	44.9915	47.2185	45.1917	43.4258	46.1253	36.4536	47.2591	55.7017	52.8978
TN2537	{2-[5,7-dihydroxy-2-(4-hydroxyphenyl)-4-oxo-4H-chromen-6-yl]-6-methyl-5-oxo-3-[(3,4,5-trihydroxy-6-methyloxan-2-yl)oxy]oxan-4-yl}oxidanesulfonic acid	C27H28O16S	HMDB0127345	49.0561	53.7824	79.1586	53.7218	60.3565	24.4346	76.1474	26.7914	86.4196	32.3523	72.6506	23.8721	38.7653	33.447	83.6513	49.4114	74.442	31.179	80.6944	56.4121	67.8027	87.9403	72.733	57.6532	35.167	75.9683	52.6659	74.3576	55.0488	39.798	61.6995	50.0208
RP2348	{2-[5,7-dihydroxy-2-(4-hydroxyphenyl)-4-oxo-6-[3,4,5-trihydroxy-6-(hydroxymethyl)oxan-2-yl]-4H-chromen-8-yl]-3,5-dihydroxy-6-(hydroxymethyl)oxan-4-yl}oxidanesulfonic acid	C27H30O18S	HMDB0127084	54.5499	82.5092	70.1521	83.2462	81.496	64.9835	68.5733	79.9444	81.5344	56.7216	86.669	77.2187	86.4701	68.6344	57.9341	59.7125	74.9963	70.7416	64.2269	75.7334	87.8675	82.8438	69.4563	82.0992	73.5148	85.16	43.5049	64.628	72.5979	85.3092	77.8814	82.7838
RP2991	{2-hydroxy-5-[(1E)-3-oxo-3-[(3,4,5,6-tetrahydroxyoxan-2-yl)methoxy]prop-1-en-1-yl]phenyl}oxidanesulfonic acid	C15H18O12S	HMDB0125186	51.9073	105.275	106.853	79.1373	42.1145	47.8161	60.1532	72.0733	34.7298	209.113	104.954	45.2303	55.4587	110.226	71.36	43.9961	44.3527	46.5593	46.4409	103.874	50.5016	179.103	47.7061	51.2473	36.8636	53.6733	47.1044	62.3283	44.2719	62.235	34.4451	65.1937
TN2775	{2-hydroxy-5-[(2E)-3-phenylprop-2-enoyl]phenyl}oxidanesulfonic acid	C15H12O6S	HMDB0135412	123.732	62.7455	132.037	142.374	228.007	145.664	145.574	127.863	345.774	284.98	405.754	285.417	196.374	622.488	1238.72	657.233	106.217	119.365	66.6117	132.142	158.733	157.552	70.7029	97.7759	490.03	505.808	382.672	755.075	466.39	310.332	319.758	254.015
TN1793	{2-methoxy-5-[3-oxo-3-(2,4,6-trihydroxyphenyl)propyl]phenyl}oxidanesulfonic acid	C16H16O9S	HMDB0128073	76.9482	78.3757	70.8048	70.8951	67.9768	72.953	65.8146	73.9682	65.9511	77.3705	68.5816	70.9923	55.5907	75.075	71.5221	63.9876	68.4176	68.8695	70.0061	68.5278	75.6673	80.703	73.7954	83.1365	75.8919	59.554	74.7423	73.698	70.9424	74.5761	80.8409	80.7352
TN1247	{3,5-dihydroxy-2-[5-hydroxy-7-methoxy-4-oxo-2-(2,4,5-trihydroxyphenyl)-4H-chromen-6-yl]-6-(hydroxymethyl)oxan-4-yl}oxidanesulfonic acid	C22H22O15S	HMDB0128565	19.5995	143.792	185.153	139.004	50.0965	17.0893	131.665	115.785	28.3695	240.712	196.088	67.3669	34.9676	250.398	147.969	44.7895	4.32731	1.9607	1.83474	180.009	80.5426	141.441	20.2389	65.4454	4.77564	4.49601	3.86112	10.1727	4.02434	105.91	11.0585	124.34
TN1692	{3-[(1E)-3-(4-hydroxy-2-methoxyphenyl)prop-1-en-1-yl]phenyl}oxidanesulfonic acid	C16H16O6S	HMDB0130356	299.824	1595.57	1529.83	1042.85	554.311	303.338	1039.6	1005.06	523.432	1606.18	1541.5	465.835	354.999	1762.62	1736.68	654.794	194.294	282.842	372.247	1721.19	613.973	1449.14	393.328	511.042	288.04	339.531	222.03	391.554	217.638	996.42	275.302	843.327
TN1520	{3-[2-(3,5-dihydroxyphenyl)ethyl]phenyl}oxidanesulfonic acid	C14H14O6S	HMDB0129951	73.4764	63.2738	53.769	53.8485	63.2554	64.9936	65.6322	91.6061	98.1066	54.1685	62.6128	81.7994	85.626	98.2959	83.1442	79.0547	69.0187	91.2125	81.9543	59.3221	68.0637	105.073	82.8058	68.7454	105.043	112.219	145.156	94.426	98.8252	124.445	99.8629	83.2198
RP2257	{3-[3-(4-methoxyphenyl)-3-oxopropyl]phenyl}oxidanesulfonic acid	C16H16O6S	HMDB0135637	77.8328	108.416	82.1584	93.0347	72.2123	74.4116	81.5985	50.7609	60.6893	88.0762	103.358	107.797	102.755	84.193	101.381	77.8486	91.8682	39.2716	57.8675	72.1518	75.3406	131.115	67.5188	77.8082	64.5574	44.9464	36.3262	83.5787	47.0298	79.1502	69.5598	72.8636
TN1061	{3-[6-(3,4-dihydroxy-6-methyl-5-oxooxan-2-yl)-5,7-dihydroxy-4-oxo-4H-chromen-2-yl]phenyl}oxidanesulfonic acid	C21H18O12S	HMDB0127327	296.138	342.255	399.495	192.883	278.751	211.286	396.906	211.757	252.655	249.439	262.677	171.024	108.153	220.921	250.892	131.955	156.536	202.845	154.467	401.459	218.401	101.802	221.114	222.01	125.8	177.361	232.61	184.161	246.531	253.117	256.119	237.512
TN1378	{4-[(1E)-3-oxo-3-[(3,4,5,6-tetrahydroxyoxan-2-yl)methoxy]prop-1-en-1-yl]phenyl}oxidanesulfonic acid	C15H18O11S	HMDB0125132	49.2401	31.6165	65.9958	71.7643	66.7659	49.5574	93.3123	67.9532	92.9399	64.8967	87.6624	32.3888	20.7764	58.646	91.0925	93.9889	84.5536	61.7963	70.2188	91.838	64.4781	93.7235	72.7445	74.9533	94.03	105.262	105.988	90.3941	82.9045	78.8927	66.8106	87.006
TN913	{4-[(E)-2-(3,5-dimethoxyphenyl)ethenyl]phenyl}oxidanesulfonic acid	C16H16O6S	HMDB0130996	95.8193	80.009	56.9388	67.295	93.733	81.2525	63.0249	73.5662	77.6374	67.9582	80.7733	113.408	46.8	92.0597	91.1361	108.452	110.824	104.309	104.119	79.2109	106.807	91.491	82.7462	97.9953	101.326	123.329	97.3792	106.3	108.589	98.7266	96.438	102.235
TN1384	{4-[(E)-2-{3,5-dihydroxy-4-[(1E)-3-methylbut-1-en-1-yl]phenyl}ethenyl]phenyl}oxidanesulfonic acid	C19H20O6S	HMDB0128996	62.2144	49.9408	89.921	58.2418	63.2384	53.826	56.7425	66.1262	66.1801	67.6724	64.1553	40.4366	14.1931	51.4007	42.7238	63.1069	38.0098	52.6491	34.1297	79.7594	46.7048	40.2974	37.8206	47.112	40.3252	29.7223	50.9815	30.6508	69.0314	63.5785	45.0828	58.1208
RP1963	{4-[2,3-dioxo-3-(2,4,6-trihydroxy-3-methoxyphenyl)propyl]-2-methoxyphenyl}oxidanesulfonic acid	C17H16O11S	HMDB0128787	86.2926	145.833	113.727	93.1317	95.7092	106.825	114.954	118.774	111.883	211.856	124.096	95.4036	78.6541	123.21	95.2144	97.883	119.808	70.8559	84.004	111.217	87.8935	114.74	93.0024	107.965	101.754	93.456	91.8857	95.6253	76.2832	80.4384	73.3649	87.7386
TN1426	{4-[3,5-dihydroxy-8-(hydroxymethyl)-8-methyl-4-oxo-4H,8H-pyrano[2,3-f]chromen-2-yl]phenyl}oxidanesulfonic acid	C20H16O10S	HMDB0127413	307.86	345.699	420.414	226.589	283.736	207.79	411.152	204.9	266.697	250.311	265.186	175.978	113.616	228.25	263.116	140.772	165.788	221.903	175.969	427.58	241.869	112.901	235.213	238.926	135.963	196.253	257.275	203.474	264.125	275.489	273.77	241.894
TN2631	{4-[5-hydroxy-8,8-dimethyl-6-(2-methylpropanoyl)-2-oxo-2H,8H-pyrano[2,3-f]chromen-4-yl]phenyl}oxidanesulfonic acid	C24H22O9S	HMDB0126104	163.472	135.186	157.935	113.744	153.412	113.997	150.351	132.985	166.587	128.028	166.994	137.262	105.489	190.001	155.651	140.425	123.607	128.77	144.683	168.753	163.061	119.44	162.723	134.319	154.07	155.529	134.552	125.322	141.105	141.229	149.93	128.915
TN2400	{5-[(E)-2-(3,5-dihydroxyphenyl)ethenyl]-2-hydroxyphenyl}oxidanesulfonic acid	C14H12O7S	HMDB0128521	585.22	704.02	307.291	772.701	426.827	839.99	431.664	772.619	538.254	359.023	475.305	749.922	272.21	548.413	567.204	760.952	830.084	648.718	657.126	786.376	424.918	588.31	489.384	804.174	551.616	480.252	740.708	540.268	712.746	661.439	432.148	654.466
RP1150	{6-[5,7-dihydroxy-2-(4-hydroxyphenyl)-4-oxo-8-[3,4,5-trihydroxy-6-(hydroxymethyl)oxan-2-yl]-3,4-dihydro-2H-1-benzopyran-6-yl]-4,5-dihydroxy-2-(hydroxymethyl)oxan-3-yl}oxidanesulfonic acid	C27H32O18S	HMDB0126870	10.6708	15.1995	12.8243	12.0282	19.2942	16.2906	16.5047	21.4773	14.9469	8.50442	13.7663	12.7875	14.8979	13.8527	9.12918	16.1719	20.6904	15.272	23.3227	13.3948	24.83	11.7544	17.2905	14.6595	30.4669	30.8863	16.5078	25.2078	14.6844	33.607	27.7475	15.7518
TN565	1-(1,2,3,4,5-Pentahydroxypent-1-yl)-1,2,3,4-tetrahydro-beta-carboline-3-carboxylate	C17H22N2O7	HMDB0012492	104.807	72.2319	104.148	84.3837	88.308	44.3723	94.0907	56.335	85.191	84.0393	128.422	55.5584	49.758	90.4101	95.4355	80.5869	96.0946	97.4186	70.7416	120.344	118.24	134.726	124.588	117.576	174.517	119.907	196.547	144.974	133.472	163.737	150.414	156.827
RP3228	1-(11Z-docosenoyl)-glycero-3-phosphate	C25H49O7P	HMDB0062304	333.315	290.39	305.589	315.407	330.054	315.965	331.835	336.903	357.231	335.76	354.189	363.088	371.745	385.653	364.045	398.763	360.299	252.065	373.465	327.985	314.437	375.298	349.117	357.508	331.833	354.142	384.528	309.832	327.818	347.983	363.858	357.723
RP428	1-(11Z-eicosenoyl)-glycero-3-phosphate	C23H45O7P	HMDB0062305	16644.4	9010.28	20690.8	16898.5	17340.8	21775.6	23613.5	19644	21469.2	16756.2	12782.6	16559.8	20687.9	15458.2	16029.9	19614	28678.6	30223.8	39578.4	38202.1	34513.2	21363.2	27119.1	24946.7	28157.6	26873.9	35164	18257.9	25242	27011.3	27310.1	19776.2
RP1238	1-(1-methylethenyl)-3-(1-methylethyl)-benzene	C12H16	HMDB0061814	154.406	165.265	161.975	156.536	120.132	133.072	139.093	170.122	248.489	238.476	200.521	222.328	227.922	174.138	274.598	136.811	91.4441	97.9639	80.755	80.3213	50.2409	79.2969	104.578	70.7389	149.222	206.376	140.683	226.396	123.718	161.831	115.39	167.816
RP1546	1-(2,3-Dihydro-1H-pyrrolizin-5-yl)-2-propen-1-one	C10H11NO	HMDB0040028	147.448	275.398	239.719	252.215	231.838	159.369	303.411	282.434	170.198	159.731	198.513	175.197	183.523	192.8	183.066	175.206	153.39	66.7282	61.8909	229.861	201.654	192.776	163.327	221.353	150.134	94.3108	92.8923	136.164	116.404	200.283	169.159	230.267
RP77	1-(2,6,6-Trimethyl-2-cyclohexen-1-yl)-1,6-heptadien-3-one	C16H24O	HMDB0029704	7.06714	282.972	168.651	228.131	210.449	256.608	250.105	214.616	243.176	213.992	204.653	202.761	229.956	178.057	188.659	173.276	18.4596	40.4006	42.8153	18.2677	50.8088	14.9004	4.38784	62.7535	6.81238	13.6869	9.47082	9.51734	13.1312	4.51655	8.43293	11.056
RP414	1-(2-hydroxy-4,6-dimethoxyphenyl)-3-(4-methoxyphenyl)propan-1-one	C18H20O5	HMDB0140276	16.1921	24.1248	25.0872	19.5667	24.5162	23.7541	26.3174	24.6858	30.5673	26.1871	28.2444	23.5318	29.5664	23.9302	24.2681	30.4456	93.6501	137.53	144.061	151.44	158.59	134.348	109.926	183.313	108.498	105.335	122.814	134.053	78.1435	85.3846	125.512	117.779
TN449	1-(3-Methylbutanoyl)-6-apiosylglucose	C16H28O11	HMDB0039953	179.402	101.319	111.423	108.265	98.6366	94.9426	107.956	95.5957	80.5922	61.9934	86.4753	82.4204	33.1354	58.4124	47.2918	64.1527	58.0654	55.1988	67.3668	56.545	44.9873	35.5681	37.2244	65.6569	69.0829	46.4059	51.1942	35.8485	39.4117	53.9493	47.1111	47.1404
RP201	1-(3-Methylbutyl)-cyclopentene	C10H18	HMDB0061800	18.1309	115.386	66.2905	96.4912	84.016	104.445	109.749	87.8793	106.938	73.2265	84.0575	90.3874	88.7211	52.3437	61.3284	55.4621	19.225	16.0315	18.9812	14.3148	15.1609	16.6603	12.1051	18.0464	17.4489	13.3337	13.3196	14.9218	11.7476	12.6263	14.603	10.8066
RP3314	1-(4-hydroxy-3-methoxyphenyl)-3-(4-methoxy-1-benzofuran-5-yl)propane-1,3-dione	C19H16O6	HMDB0129392	53.9717	63.2094	86.6238	88.6005	76.9604	92.2715	103.967	103.83	108.731	147.352	82.5759	98.2252	62.7058	119.162	120.361	126.804	119.105	104.223	93.7504	131.364	115.57	92.1385	89.9462	55.794	107.893	51.0554	113.231	106.72	116.629	101.449	92.5642	74.6693
RP2310	1-(4Z,7Z,10Z,13Z,16Z,19Z-docosahexaenoyl)-glycero-3-phosphate	C25H39O7P	HMDB0062307	1380.66	782.101	2130.35	1844.44	1575.45	1040.03	1850.8	1384	1646.22	2856.59	1696.83	1598.55	1429.64	2333.34	1607.42	1966.25	1709.31	1387.36	1760.4	2737.16	2903.33	2118.57	1545.99	1508.82	2258.79	1934.51	2759.71	1275.52	1555.81	2914.68	2735.32	2345.68
TN2387	1-(5Z,8Z,11Z,14Z-eicosatetraenoyl)-sn-glycero-3-phosphate	C23H39O7P	HMDB0062312	55.2024	61.4288	59.1431	52.8971	57.0064	54.9462	55.1239	57.6346	60.7829	48.2771	59.453	56.8001	32.3813	55.7353	57.2197	56.4432	59.0631	54.4085	56.1062	47.4249	57.0468	57.0276	57.3815	55.0678	55.6757	57.1395	53.2221	54.7648	56.7808	54.2851	58.3342	53.248
TN1419	1-(6-hydroxy-2H-1,3-benzodioxol-5-yl)-3-(4-methoxy-1-benzofuran-5-yl)propane-1,3-dione	C19H14O7	HMDB0129362	41.3625	77.67	81.5197	46.5922	41.8718	36.6168	53.5671	41.5711	86.9545	44.7552	93.8784	40.0769	71.1792	51.6133	86.5865	87.9296	105.8	85.7099	98.3465	60.6798	81.7363	29.8694	80.6966	41.3384	88.7279	108	92.4875	36.862	78.6475	93.0266	31.1409	83.0592
RP1185	1-(9Z,12Z,15Z-octadecatrienoyl)-glycero-3-phosphate	C21H37O7P	HMDB0062320	130.405	59.173	70.1074	68.7404	93.924	48.1527	138.847	65.9703	83.5838	50.3349	78.3677	87.3535	49.8836	65.5237	49.8774	120.3	110.669	179.662	115.272	105.996	117.03	75.4892	125.381	76.1598	160.469	114.178	108.814	104.632	144.144	72.5254	78.0523	95.816
TN444	1-(9Z-hexadecenoyl)-glycero-3-phosphate	C19H37O7P	HMDB0062323	170.644	138.33	188.066	161.576	181.141	154.757	178.818	184.408	184.883	141.035	144.066	135.047	85.9961	135.383	98.2156	133.114	93.0607	106.981	130.816	119.631	100.836	119.473	113.688	125.417	114.818	107.475	127.859	85.6511	119.28	106.892	101.989	113.19
RP2780	1-(beta-D-Ribofuranosyl)-1,4-dihydronicotinamide	C11H16N2O5	HMDB0011648	503.893	449.54	378.832	546.293	707.044	504.966	420.907	394.407	610.113	453.883	625.884	364.18	758.685	280.303	426.577	719.662	415.073	426.226	358.598	443.159	459.62	360.59	331.138	643.256	497.997	514.82	492.593	506.569	435.05	460.98	401.743	787.123
RP1197	1-(Methylsulfinyl)propyl propyl disulfide	C7H16OS3	HMDB0033061	38.0597	35.0098	33.2176	31.8428	31.6994	31.923	26.4246	27.6753	29.9248	29.5702	29.3849	28.311	28.567	27.8613	30.2744	27.772	24.9788	27.4199	25.6181	28.6099	24.3246	26.4239	30.7788	24.5571	26.8147	26.3613	25.6059	29.2846	30.4144	27.6394	27.0678	28.8129
RP3274	1,1';-(1,4-Dihydro-4-nonyl-3,5-pyridinediyl)bis[1-decanone]	C34H61NO2	HMDB0035517	41.7684	46.1119	41.8669	36.0341	33.5788	38.4529	36.8293	42.6577	39.0262	36.4626	27.8161	40.5048	37.8761	37.7329	42.6358	36.0346	41.4773	41.7171	36.2842	35.2521	38.4054	40.9491	42.1491	40.0493	31.5107	33.631	40.7559	34.4585	33.3112	31.2397	37.1738	38.2749
RP622	1,1';-[1,12-Dodecanediylbis(oxy)]bisbenzene	C24H34O2	HMDB0039760	59.5578	92.9364	156.372	150.555	180.763	156.266	127.099	156.37	176.85	145.054	140.06	118.423	146.318	130.041	141.616	113.191	20.459	21.5956	17.9998	33.5382	28.4998	19.1954	17.084	24.279	17.2556	13.6204	10.5304	15.587	14.0123	10.6467	10.508	312.534
TN779	1,17-Diamino-4,9,13-triazaheptadecane	C14H35N5	HMDB0039492	61.6463	157.276	119.158	146.454	117.888	128.342	115.897	106.098	146.572	103.814	107.728	112.196	90.2738	60.8336	97.9305	65.9334	34.5986	41.9638	68.0794	20.8326	29.2803	22.3063	30.1084	23.306	43.0866	52.4879	47.3798	28.783	171.476	94.5615	67.1863	75.9392
TN1502	1,2';,3,5-Tetra-O-galloylhamamelofuranose	C34H28O22	HMDB0039371	73.3505	141.825	103.216	88.084	84.6608	97.402	74.1212	87.5188	92.5693	180.845	82.7909	100.484	8.74772	149.779	99.9373	95.529	85.872	87.3926	92.5125	67.2242	81.2236	89.6955	76.8386	60.7011	96.5235	80.2163	74.6399	84.6234	96.4785	90.9072	53.8211	95.4281
RP3351	1,28-Dicaffeoyloctacosanediol	C46H70O8	HMDB0038064	87.6508	73.5496	356.926	149.717	246.934	87.5964	114.003	227.77	154.133	264.315	246.47	261.533	125.78	71.0921	364.003	506.24	120.69	142.994	231.161	125.04	519.63	241.275	118.907	128.811	352.01	346.171	232.006	193.612	164.033	159.195	312.455	307.021
RP111	1,28-Octacosanediol diferulate	C48H74O8	HMDB0038065	31.5165	17.4459	29.0773	17.6677	21.0979	21.4857	56.958	23.4322	20.4382	23.2357	40.1811	43.6542	33.6633	39.2833	86.3981	85.3955	214.39	248.715	216.262	290.937	215.313	188.132	208.875	190.467	199.306	204.682	165.687	162.772	210.335	154.828	223.089	214.464
TN1808	1,2-Butanedithiol	C4H10S2	HMDB0041492	13.4068	11.4713	8.29943	12.5589	8.74184	15.7374	8.71037	10.663	15.7033	13.3777	14.0657	18.6708	6.84396	14.3077	22.6409	18.15	11.1114	18.9134	16.1185	17.2519	10.9135	7.82552	15.598	17.9696	16.056	19.1584	22.4938	15.0945	17.247	16.2262	14.8061	16.7199
RP1398	1,2-Diacylglycerol-LD-PI-pool	C7H5NO	HMDB0062270	162.995	25.38	27.6838	48.346	36.8972	68.3648	69.7055	52.2585	73.8824	21.0561	53.7983	91.1474	28.6278	32.5803	31.6403	36.379	73.434	231.603	202.259	70.6183	49.3761	45.4842	128.531	85.5182	111.298	127.187	111.771	114.944	132.305	56.8264	45.7922	45.1069
TN139	1,2-Diacylglycerol-LD-PS-pool	CCl3NO2	HMDB0062271	4.97904	5.95934	5.05607	5.59273	6.44055	5.47693	5.39492	5.31878	4.68327	3.44785	5.83727	4.98327	5.93214	5.62725	6.22349	7.30402	7.58483	7.71998	7.12927	7.37161	7.22687	7.33849	7.02737	8.45532	8.70152	8.29015	7.79182	8.61975	7.45679	8.52717	8.7181	5.23933
RP3265	1,2-Digalloyl-beta-D-glucopyranose	C20H20O14	HMDB0039178	183.078	248.11	114.516	28.3378	275.573	203.498	120.165	85.9503	196.918	63.9815	128.342	241.281	266.144	108.436	237.419	111.68	67.8242	184.896	75.9188	98.3709	109.559	26.6965	129.631	132.695	211.149	175.564	227.483	191.45	164.577	191.737	231.783	202.967
RP2101	1,2-Dioctadecanoyl-3-(galactosyl-B-1-6-galactosyl-B-1)-glycerol	C51H96O15	HMDB0011132	67.5833	34.3289	124.983	74.9307	98.083	76.7469	97.5045	73.8569	2.33897	2.12168	3.64797	0.0979375	1.16773	0	0	1.83709	77.9699	70.2851	25.7666	134.513	91.3608	28.1993	51.6368	69.4582	3.06493	1.23723	2.71235	0	1.16007	1.96768	0	1.46826
TN2742	1,2-diphenylethane-1,2-diol	C14H14O2	HMDB0135186	35.8927	31.4169	53.3463	52.0088	44.3423	25.6301	46.2838	31.6493	40.4774	49.3838	47.8635	25.5788	10.5865	35.3528	39.1199	37.2902	41.5458	41.8746	30.8625	61.4961	47.6028	47.1243	46.6504	41.9479	45.4268	62.1276	50.4371	49.2772	30.922	40.0074	29.2691	32.1393
RP3136	1,2-Disinapoylgentiobiose	C34H42O19	HMDB0030335	10.9049	24.3884	26.9311	32.844	15.2166	15.2443	24.2062	27.5662	20.082	114.477	36.7043	11.5414	16.338	58.9995	31.1568	19.0883	15.5216	20.8284	18.1589	32.4542	22.837	69.9099	20.5233	23.2675	22.3423	20.0198	28.1385	28.6822	14.8062	26.782	26.3929	60.1709
TN1658	1,3,4,5-Tetra-O-galloylquinic acid	C35H28O22	HMDB0039343	15.84	32.5977	23.9472	22.2983	22.1429	31.3788	18.1541	28.5908	24.5613	53.2204	19.2674	40.8759	7.82253	38.0193	26.4456	37.037	37.8203	31.0483	38.7908	33.4595	27.17	27.2958	21.8596	34.0136	42.1436	36.3254	32.3869	33.4251	32.4741	33.4753	19.93	30.9838
RP870	1,3-Dihydro-(2H)-indol-2-one	C8H7NO	HMDB0061918	144.706	138.748	105.242	117.88	206.807	209.971	161.77	177.151	177.623	128.71	158.49	144.67	141.045	89.2761	100.126	93.8947	199.118	226.61	219.425	152.5	215.468	151.245	196.196	180.677	248.543	232.148	232.006	185.712	255.93	179.634	184.149	175.48
RP2132	1,4-Benzothiazine-O-quinonimine	C12H12N2O5S	HMDB0012491	102.015	106.013	118.809	114.685	113.81	101.341	127.904	110.634	87.7647	128.441	115.958	106.252	98.5568	118.194	121.832	119.485	116.334	68.5897	91.0895	128.125	153.824	115.877	106.999	113.869	108.642	94.3943	79.9421	107.012	82.3508	134.533	101.619	127.995
RP2762	1,4-Bis-(1,1-dimethylethyl)-benzene	C14H22	HMDB0094670	41.5853	110.041	80.4595	103.602	92.0624	120.009	138.391	131.156	144.052	117.709	104.635	100.491	90.9724	118.318	92.851	86.1306	91.9696	123.217	143.057	167.434	149.063	136.782	108.826	128.053	139.383	120.097	123.865	138.397	79.1672	90.9485	90.3706	106.351
RP1017	1,4-Undecadiene	C11H20	HMDB0032712	0.89986	19.1848	8.59297	18.4739	23.6698	12.3401	14.3148	20.3238	17.4454	16.5656	8.85906	16.7614	16.7553	18.4446	10.3969	8.67926	25.5267	29.4713	29.4063	35.6522	29.321	26.5598	19.6744	27.5151	25.8672	29.9277	19.1962	32.078	15.6323	19.8176	14.617	18.9241
TN492	10,11-dihydro-20-trihydroxy-leukotriene B4	C20H34O7	HMDB0012503	395.913	278.948	307.301	88.8228	387.595	485.562	317.583	396.276	535.074	250.307	467.071	511.022	146.164	320.318	449.518	274.209	160.653	271.884	193.396	140.823	152.188	106.451	182.808	134.051	276.144	304.702	340.441	201.106	327.373	290.035	274.951	181.231	10、11-二氢-20-三羟基白三烯B4是白三烯B4（LTB4）的脂质ω-氧化的代谢产物。LTB4是中性粒细胞多形核白细胞中的主要代谢产物。ω-氧化是人类多形核白细胞中白三烯B4分解代谢的主要途径。白三烯是从5-LO（5-脂氧合酶）作用衍生的花生四烯酸的代谢物。5-LO的直接产物是LTA4（白三烯A4），可通过LTA4水解酶或LTC4（白三烯B4）酶促转化为LTB4（白三烯B4）。白三烯C4）通过LTC4合酶。白三烯产生的调节发生在各种水平上，包括5-LO的表达，5-LO向核周区域的易位和磷酸化以增强或抑制5-LO的活性。具有生物活性的LTB4通过特定细胞色素P450（CYP4F）的w-氧化进行代谢，然后从w-羧基位置和CoA酯形成后进行β-氧化。（PMID：7649996，17623009，2853166，6088485）。白三烯是类二十烷酸。类二十烷酸由前列腺素（PGs），血栓烷（T…
TN2574	10,11-dihydro-leukotriene B4	C20H34O4	HMDB0012504	186.863	126.4	132.054	162.011	157.108	121.113	129.879	124.07	122.728	115.524	122.094	107.432	94.1241	87.3528	119.1	106.904	104.293	111.404	228.107	117.205	83.0697	86.9113	139.139	102.966	195.247	116.369	85.1204	120.048	114.423	60.2963	66.4183	174.694
RP835	10-Eicosene	C20H40	HMDB0040709	6.39018	14.9157	6.1797	10.4988	11.0532	11.812	11.8351	5.40961	11.846	5.69621	6.97815	5.61061	8.016	5.85751	5.58789	8.01987	8.02521	21.1978	13.2312	15.2716	10.5974	13.9976	11.5133	8.54232	12.1538	15.2591	12.6526	12.1598	12.4238	11.3264	9.28073	5.62115
TN1255	10-Hydroxy-E4-neuroprostane	C22H32O5	HMDB0062276	107.443	18.7398	96.9287	94.6079	86.8454	100.459	100.413	92.3003	96.5059	75.7102	99.679	91.9356	34.7419	114.471	88.3614	90.4273	83.681	83.3398	112.597	106.174	78.2658	63.7519	71.1802	67.754	98.931	78.3497	86.3534	69.3092	88.17	87.1921	58.8219	74.0132
RP3011	10-Undecenoic Acid	C11H20O2	1491-1147-1218	17.1418	191.441	147.931	172.016	143.889	119.68	159.728	174.896	174.337	67.5302	75.895	52.789	96.4986	63.7006	52.6026	47.1461	73.5328	196.059	226.564	161.138	195.392	198.741	112.845	236.208	188.65	85.3057	38.7822	70.359	33.9992	38.944	40.9733	67.7185
RP453	11,12-Dimethoxy-8,11,13-abietatrien-20,7-olide	C22H30O4	HMDB0035856	379.404	367.699	680.441	580.607	674.404	597.184	612.927	607.869	634.648	632.252	519.138	507.543	512.572	562.613	500.419	428.023	59.5997	82.8273	105.612	105.579	84.1766	67.874	51.6815	51.0313	49.9147	48.352	41.6616	35.9836	28.4891	26.5683	27.068	1128.91
TN2295	11,14,17-Eicosatrienoic acid	C20H34O2	HMDB0060039	46.8696	45.7646	66.2169	96.4209	53.5393	43.5939	84.2592	40.9507	24.3528	10.0138	40.9755	15.5237	7.96109	12.3468	12.3512	24.4549	55.8071	107.232	711.252	87.4107	61.0861	52.4229	61.9988	56.2993	21.9545	13.4915	10.3665	22.1468	23.0911	13.859	11.1695	11.0956
RP1354	11';-Carboxy-alpha-tocotrienol	C26H38O4	HMDB0012516	2035.68	1231.05	2020.45	1638.59	1608.53	1704.6	2357.38	1545.48	886.525	717.783	729.407	885.446	713.339	683.463	567.819	1021.65	1486.49	1592.31	1333.91	2174.81	1861.55	952.143	1376.8	1340	596.285	430.73	555.804	313.601	511.601	355.847	364.958	385.613
TN2802	11';-Carboxy-gamma-chromanol	C25H40O4	HMDB0012517	16.506	27.446	10.6296	28.5894	13.878	12.2931	23.6024	10.9024	36.421	15.0442	50.1621	11.9029	5.40231	32.0189	15.0942	40.0645	17.3623	10.1024	21.8931	22.2366	20.1616	16.5037	18.7469	11.3741	70.4538	11.4976	14.1958	40.1731	45.35	16.6826	7.24652	12.2872
RP90	11';-Carboxy-gamma-tocotrienol	C25H36O4	HMDB0012518	178.363	61.6422	217.432	160.947	191.544	183.246	154.001	173.122	186.54	192.921	188.341	148.435	151.47	168.405	182.476	150.317	32.9242	28.9415	43.7389	30.0852	29.2116	23.0835	24.5972	29.0133	29.0276	13.4475	23.1126	16.0963	23.7857	14.0946	12.4446	17.5974
TN880	11-[(2R,3S)-3-[2-amino-3-methyl-4-(2-methyl-1,3-thiazol-4-yl)but-3-en-1-yl]-2-methyloxiran-2-yl]-3,7-dihydroxy-4,4,6,8-tetramethyl-5-oxoundecanoic acid	C27H44N2O6S	HMDB0127524	478.197	342.929	495.724	403.234	432.966	463.599	454.461	252.233	198.981	203.365	181.334	178.242	111.649	190.686	148.125	158.487	237.584	301.492	223.076	259.933	230.671	184.546	216.924	210.878	198.692	231.023	213.746	142.463	227.25	167.073	147.324	120.874
RP2995	11-beta-Hydroxyandrosterone-3-glucuronide	C25H38O9	HMDB0010351	269.312	343.737	141.584	359.422	263.748	150.791	342.093	200.532	359.316	217.455	542.411	224.808	421.747	261.765	160.071	259.772	292.91	186.558	289.106	457.74	437.983	369.3	353.068	300.712	1199.16	193.057	198.003	448.949	588.235	245.601	153.735	207.271
TN2347	11b-PGE2	C20H32O5	HMDB0060041	67.7948	34.0138	46.6278	53.2189	50.5294	49.6849	82.5607	57.6561	54.2454	31.5808	37.4267	41.9973	7.56693	35.5662	25.6269	27.5333	52.0438	43.1329	87.4044	51.577	35.0306	37.9124	43.5506	42.1372	33.7561	27.2068	30.4153	20.4208	33.6499	28.776	22.5551	30.5414
TN639	11-Hydroxy-E4-neuroprostane	C22H32O5	HMDB0062284	53.0703	35.4271	56.3716	53.5022	54.4083	53.0109	56.914	52.2421	52.4544	53.5739	64.2394	47.4223	20.2288	61.2273	44.9276	51.1983	45.849	53.0183	51.3	50.6375	35.0709	27.4918	37.7219	41.8846	40.3994	37.4697	52.107	27.5282	39.3244	48.1297	34.3546	31.0484
TN716	11-nor-9-carboxy-Delta(9)-tetrahydrocannabinol	C21H28O4	HMDB0062770	38.6323	36.6291	43.2701	36.8215	40.9238	37.963	48.3888	34.1853	20.2617	32.0717	26.7317	48.367	14.498	28.936	29.8551	35.3824	54.1439	51.6563	52.3668	51.5185	46.5043	43.3746	54.4168	54.4189	47.5797	29.5307	48.5991	20.4903	43.3765	31.103	34.4033	32.808
TN2154	11-Oxohexadecanoic acid	C16H30O3	HMDB0030978	212.066	141.84	199.756	171.26	188.722	195.076	195.756	209.079	189.323	164.368	188.102	188.916	85.3273	169.711	150.841	164.393	215.274	210.114	253.654	227.164	199.593	149.94	186.573	178.329	199.156	159.903	206.938	115.531	135.541	135.747	133.846	126.345
RP1541	11-trans-LTE4	C23H37NO5S	HMDB0062286	194.908	159.178	226.081	225.855	230.724	191.555	199.849	195.944	185.083	213.78	182.898	182.292	168.901	161.409	132.923	149.138	173.169	178.415	183.25	214.238	210.869	171.702	180.212	170.317	181.636	176.695	172.081	148.859	180.771	180.782	182.307	183.12
TN1245	12(13)Ep-9-KODE	C18H30O4	HMDB0013623	107.746	81.6679	121.79	94.6577	103.57	104.962	105.83	110.551	102.757	80.16	94.376	100.608	42.09	81.5627	70.4241	78.412	76.0543	89.9108	102.092	108.491	92.1115	60.1861	84.6195	76.548	104.719	67.1861	88.0793	28.0146	68.1127	64.5475	60.7811	65.7877
RP258	12,15-Epoxy-13,14-dimethyleicosa-12,14,16-trienoic acid	C22H36O3	HMDB0112073	81.7248	66.6007	119.31	84.223	90.8539	83.4621	97.2196	112.701	103.695	86.7063	93.306	61.2454	91.956	74.4379	98.0849	94.6669	35.3133	48.997	59.4073	78.2781	67.3639	52.5897	52.9073	68.5124	58.1504	61.5305	47.4669	42.4099	25.5173	40.6649	40.4757	60.0729
RP926	12,20-Dioxo-leukotriene B4	C20H28O5	HMDB0060094	78.3456	86.6822	76.0477	90.5384	84.138	79.1143	83.1584	78.1669	85.6185	92.2066	98.6441	92.0441	94.3351	86.817	89.7822	86.9046	85.2877	88.6896	91.6593	96.5039	98.5322	97.3424	97.7822	96.9844	93.2409	88.073	98.2835	96.9788	92.8373	103.33	100.228	97.5583
TN2065	12-[6,11-dihydroxy-2-(hydroxymethyl)-2,5-dimethyl-10-oxo-3,4,5,10-tetrahydro-2H-1-oxa-5-azatetraphen-4-yl]-6,11-dihydroxy-2,2,5-trimethyl-5,10-dihydro-2H-1-oxa-5-azatetraphen-10-one	C38H34N2O9	HMDB0135318	22.8452	347.155	304.34	282.318	39.8631	31.9814	196.987	216.589	54.5317	1739.57	490.08	101.564	71.7986	765.759	263.924	118.965	29.7264	16.2664	14.1636	430.421	131.076	938.485	50.1484	110.584	44.5037	22.4762	20.4833	25.0392	36.7079	206.684	53.607	320.353
RP212	12a-Hydroxy-3-oxocholadienic acid	C24H34O4	HMDB0000385	53.746	104.125	82.1552	99.6462	88.2242	64.8722	80.1468	73.0289	109.266	69.62	126.604	122.065	113.084	80.3347	110.015	96.8981	30.7592	59.0702	32.4877	30.5142	24.6315	37.0132	25.7835	40.0542	16.0715	31.9991	35.5033	20.327	32.6782	54.7292	38.075	47.2346
TN1641	12alpha-hydroxy-3-oxo-5beta-cholan-24-oic Acid	C24H38O4	HMDB0062742	144.915	180.924	409.555	157.388	109.915	137.323	95.7742	115.935	57.4945	88.3369	49.7185	18.4609	9.80535	42.5902	27.7579	33.8533	59.8568	55.0342	98.3569	183.374	123.991	84.9668	87.9854	122.261	57.821	23.8617	56.447	35.011	63.4181	71.9347	68.4703	78.4619
RP2876	12-Methyltridecanal	C14H28O	HMDB0032432	37.5461	32.8592	42.7718	37.3875	26.1063	32.2593	40.0499	34.673	37.6358	33.2794	32.6802	33.1096	28.4884	38.3188	27.5992	32.6403	31.1785	29.8662	30.0977	30.0836	35.0255	33.5562	39.2404	36.8335	36.3183	29.8741	30.7765	39.3417	49.7944	39.6285	34.1912	33.1623
RP301	12R-hydroxy-5Z,8Z,12Z-eicosatrienoic acid	C20H34O3	HMDB0062290	5938.33	558.914	8850.14	5387.28	6908.08	5657.9	5361.77	5865.51	6106.73	6778.71	5415.24	4902.55	5165.5	6131.26	5134.83	4879.18	2126.78	2677.96	3118.79	3198.53	3370.25	3256.41	2814.14	2057.12	2571.05	2310.74	2699.79	1619.16	1920.5	1364.16	1730.36	1669.66
TN791		C20H32O3	HMDB0062287	29.9667	27.5837	34.9172	26.7792	34.6973	46.4807	45.1134	34.7133	15.2601	25.5725	24.2853	30.4934	27.1828	27.0209	12.8366	10.3171	18.2115	29.328	24.3221	31.6849	28.5032	19.6035	25.7938	27.2276	19.4503	14.6705	11.5941	12.3389	9.87291	9.88144	7.57159	8.0447
RP3115	13';-Carboxy-alpha-tocopherol	C29H48O4	HMDB0012555	63.0107	30.1226	49.0467	75.4699	71.8427	92.1907	59.6268	61.4914	70.4094	17.4137	26.3736	116.659	36.202	26.3747	32.2167	38.3901	49.7697	82.2449	77.4846	59.2874	48.9607	51.1594	65.8199	49.9923	40.4209	155.853	71.4718	32.4945	172.231	32.1744	45.9463	35.159
RP2387	13';-Hydroxy-alpha-tocotrienol	C29H44O3	HMDB0012560	4160.55	2393.74	4322.29	4459.84	3513.98	3661.43	4370.54	4268.65	3123.2	3367.08	3104.32	3816.1	3283.93	3355.16	2760.73	3472.18	4435.54	3430.12	3839.95	4653.28	4362.32	3415.38	4523.81	3329.14	3171.16	3049.56	3863.63	1921.85	3103.48	2888.77	3372.31	2356.13
TN1326	13-HDoHE	C22H34O	HMDB0060043	52.7241	41.678	51.7999	18.1603	23.4986	19.8976	55.5512	35.9956	49.8285	16.0395	30.1618	22.0579	14.8358	49.736	35.4945	25.1823	44.3878	33.7826	42.3382	41.1891	31.4597	19.0276	17.0024	39.0127	40.8338	32.4123	46.413	10.8215	28.9308	24.7513	25.2641	27.9165
TN364	13-Hydroxy-9-methoxy-10-oxo-11-octadecenoic acid	C19H34O5	HMDB0040901	109.865	44.8051	80.3333	56.8302	41.135	52.3192	59.99	51.8282	28.4481	34.0237	29.6307	43.8127	15.9313	25.6916	22.745	26.829	134.881	146.34	85.6116	56.2959	38.5696	47.5538	63.4671	41.3108	133.466	114.781	106.771	116.6	101.052	103.095	97.1808	125.055
RP241	14,15-DiHETrE	C20H34O4	HMDB0002265	487.261	93.6065	725.039	435.398	574.279	506.086	443.937	509.933	526.016	610.022	467.228	458.345	443.94	551.845	444.871	448.556	205.972	248.548	305.044	309.269	299.929	282.558	249.408	171.061	226.649	220.282	235.09	128.586	145.408	160.688	178.071	153.895
RP2040	14alpha-Hydroxy-4beta-deoxypaxilline	C27H33NO4	HMDB0040979	90.8005	68.0386	84.5845	110.287	102.949	93.0839	94.8473	76.7136	111.44	85.5669	107.715	79.5081	88.1676	83.9049	110.614	94.8952	115.402	101.301	139.578	117.851	110.43	130.288	104.006	92.7937	125.809	136.986	94.0627	131.845	142.653	111.746	110.18	89.8013
TN102	14alpha-Hydroxypaxilline	C27H33NO5	HMDB0040978	25.9022	35.8474	40.6996	49.7044	31.771	43.3592	38.9539	41.2277	40.8925	36.0074	50.6638	35.2952	6.92183	42.7897	28.134	44.24	27.5359	14.6943	6.86768	25.5729	23.9474	9.99091	18.9803	16.6167	29.6197	14.1636	27.2361	18.3489	28.486	22.5356	12.1027	13.1063
RP2706	14-oxo-DoHE(1-)	C22H30O3	HMDB0062685	715.856	587.03	832.23	711.293	705.314	643.093	807.654	671.857	619.579	579.437	637.518	681.076	737.267	615.83	600.344	693.421	760.082	757.477	1056.74	850.566	739.289	520.79	808.982	813.771	767.594	532.505	796.198	371.526	365.428	511.305	489.314	421.323
RP28	15-Ketoprostaglandin F2α	C20H32O5	1479-366-404	101.435	272.464	292.682	310.981	321.926	287.987	293.004	288.694	283.932	315.727	261.386	302.038	277.684	308.389	266.853	246.797	80.8048	106.966	109.814	107.89	94.6632	75.3775	62.7432	61.0925	61.6483	64.1338	55.7244	49.5579	48.6548	40.5689	49.1529	50.2166
RP1088	15-Methylpalmitic Acid	C17H34O2	1478-79-87	992.581	1535.96	1441.26	1044.28	1058.39	750.584	50.081	924.873	157.877	183.917	233.737	294.616	232.17	299.96	90.5446	83.3197	22.0113	23.4389	26.9001	36.3995	38.3494	31.5222	39.5753	32.6542	31.239	26.0606	25.8376	22.6881	22.2895	20.5594	19.9175	43.4891
RP38	15-Oxoete	C20H30O3	1477-713-765	217.988	952.136	803.339	919.237	911.008	1073.71	993.099	762.989	910.64	996.93	984.87	985.428	918.327	917.648	888.639	1058.06	300.648	258.376	321.107	343.023	379.948	328.189	299.88	273.409	244.542	359.549	331.486	236.513	504.33	220.31	208.383	249.669
RP118	16-Methyl-epi-nigakihemiacetal B	C23H32O6	HMDB0039886	481.197	58.4277	629.216	421.104	517.282	457.593	434.335	475.092	538.099	574.062	484.639	418.514	419.154	438.062	417.094	354.034	49.3546	54.2577	72.8819	65.3517	61.7918	47.9684	40.8427	30.69	46.6064	34.8215	27.5507	21.9064	42.7039	33.093	26.4911	39.078
TN1626	17-Hydroxyandrostane-3-glucuronide	C25H40O8	HMDB0010359	1541.91	940.998	1798.82	1239.6	1144.08	1393.39	1645.64	1240.09	275.86	325.3	176.591	296.007	78.0222	228.238	161.34	199.72	982.889	868.485	770.329	1473.65	1230.5	592.937	858.431	860.945	215.856	159.689	322.232	102.326	234.11	218.243	185.324	209.479	17-羟基雄烷-3-葡糖醛酸是类固醇葡糖苷糖醛酸。
RP760	18-Carboxy-dinor-LTE4	C21H31NO7S	HMDB0012607	1056.09	841.109	1223.9	1259.08	1148.18	1425.85	1357.79	1319.38	1311.18	1113.08	1014.58	969.16	1323.47	853.047	1132.29	996.244	738.696	875.368	951.362	856.027	996.465	494.189	736.991	675.366	649.326	803.798	737.586	475.502	655.167	600.193	704.243	461.043	18-羧基-二价-LTE4是通过白三烯E4（LTE4）的脂质氧化的代谢物。白三烯E4（LTE4）是半胱氨酸白三烯。半胱氨酰白三烯（CysLTs）是一类强力炎症介质，似乎有助于变应性鼻炎的病理生理特征。CysLTs引起的鼻腔阻塞主要是由于鼻血管扩张引起的，而鼻腔血管扩张可能是由于CysLT1受体激活产生的一氧化氮所致。LTE4通过与假定的七个跨膜受体偶联并与G蛋白和随后的细胞内信号传导途径发生特异性相互作用，激活收缩和炎症过程。在γ-谷氨酰转肽酶和来自肾脏的微粒二肽酶催化的反应中，LTE4由白三烯C4代谢。（PMID：12607939，12432945，6311078）。白三烯是类二十烷酸。类二十烷酸由前列腺素（PGs），血栓烷（TXs），白三烯（LTs）和脂蛋白（LXs）组成。PG和TX统称为类前列腺素。最初显示前列腺素是在前列腺中合成的，血小板（血小板）中的血栓烷和白细胞中的白三烯是合…
RP185	18R-hydroxy-5Z,8Z,11Z,14Z,16E-eicosapentaenoic acid	C20H30O3	HMDB0062222	139.748	633.728	505.408	659.254	595.115	571.701	596.993	580.731	692.677	568.257	510.861	486.564	641.108	585.473	554.545	473.729	283.393	312.296	364.661	409.092	343.071	302.197	201.702	319.54	238.243	284.798	200.678	216.738	154.492	144.092	146.344	183.763	18（R）-HEPE是一个18-HEPE，其由（5Z，8Z，11Z，14Z，16E）-icosapentaenoic其中18-羟基基团具有R-构型。它具有小鼠代谢产物和抗炎剂的作用。它是18（R）-HEPE（1-）的共轭酸。它是18（S）-HEPE的对映体。
TN1045	19,20-DiHDPA	C22H34O4	HMDB0010214	7118.55	4934	7363.67	6785.5	6693.55	7022.65	6851.41	6220.02	5857.76	5668.63	7201.47	6219.84	2420.03	7082.39	5997.02	6931.26	8144.01	8535.49	10372.3	10439.6	7485.93	5762.71	7554.77	7188.58	9430.55	8475.58	9090.66	6998.38	8446.57	8541.28	6284.82	6804.42
TN51	19-Hydroxydeacetylnomilinic acid 17-beta-D-glucopyranoside	C32H46O16	HMDB0037589	402.583	404.298	381.614	354.72	363.78	366.191	423.041	423.302	375.437	371.463	360.44	384.212	214.323	431.792	372.534	398.533	303.076	309.255	283.176	358.277	318.746	223.551	259.687	232.811	284.084	261.996	293.634	310.697	215.199	282.392	223.903	229.801
RP1759	19-hydroxyprostaglandin H2(1-)	C20H32O6	HMDB0062683	40.1682	172.096	31.5766	129.777	64.6293	94.2157	47.015	53.7947	102.761	113.024	140.755	318.988	114.657	185.557	93.1589	193.673	70.9239	27.4564	58.915	56.9137	105.814	109.169	78.8416	95.833	222.474	146.686	154.064	172.625	259.972	199.443	115.693	113.805
TN2799	19-Noretiocholanolone	C18H28O2	HMDB0005886	49.7825	47.538	41.9768	42.2313	42.3975	41.2502	44.4806	46.3015	45.1246	43.0418	41.8591	44.3987	38.1796	41.7477	38.6061	37.8476	37.4543	40.2323	38.8217	39.6704	39.8376	42.3172	42.1088	40.6418	42.3539	40.5713	43.9812	41.1705	44.5797	44.7432	41.9462	42.3529
RP830	1-Acetyl-2-methylcyclopentene	C14H24	HMDB0061832	17.6402	49.7168	33.9317	53.0734	57.1382	91.7858	61.093	43.1369	55.1211	68.1153	79.0034	82.9868	68.3868	68.3428	67.7846	106.378	30.2334	27.9952	33.2505	40.8516	49.4785	52.228	34.7928	36.1482	31.9547	46.0834	47.2637	36.5201	49.698	42.0273	35.2559	38.448
TN1596	1-alpha-Acevaltrate	C24H32O10	HMDB0033653	138.292	25.3102	99.9304	67.9051	67.7687	59.433	141.267	72.0921	51.5692	24.2659	94.8765	22.788	7.6806	63.929	108.402	66.078	25.2799	31.9527	27.725	50.0758	66.9716	52.2058	20.09	42.0994	152.136	118.416	38.7682	123.411	48.577	12.772	92.9199	67.3356
RP134	1-Arachidonoylglycerophosphoinositol	C29H49O12P	HMDB0061690	229.595	230.836	220.487	260.913	203.057	248.882	204.801	211	268.337	198.205	249.005	226.96	200.598	181.543	247.203	146.159	20.8542	14.9052	15.2965	8.78317	7.99047	6.86969	10.2463	10.6994	7.88377	13.4801	5.70345	9.09189	7.61702	5.19985	6.87817	4.33843
RP2609	1-eicosanoyl-glycero-3-phosphate	C23H47O7P	HMDB0062315	168.436	170.515	158.615	148.721	150.484	153.493	163.365	170.161	163.704	165.613	161.986	165.362	164.662	174.216	157.586	153.051	174.935	169.991	45.486	160.242	163.359	167.09	175.678	181.406	36.539	57.4386	154.654	171.363	139.35	155.478	146.493	177.544
TN1280	1-heptadecanoyl-glycero-3-phosphate	C20H41O7P	HMDB0062318	65.5468	42.537	45.9646	49.6068	57.067	31.3459	49.5968	34.6911	31.8262	47.7852	42.3763	38.7373	10.5739	52.1828	30.1892	46.2464	40.8643	40.4248	45.6884	42.7206	47.8566	41.1346	44.0506	47.6382	38.0514	78.4068	60.1615	57.7216	65.9674	66.237	74.6116	63.4584
RP1174	1-hexadecyl-glycero-3-phosphate	C19H41O6P	HMDB0062325	195.516	311.211	441.77	464.004	254.267	243.313	232.161	210.154	188.603	194.261	189.249	177.141	162.949	179.624	71.5398	75.9162	133.299	125.746	113.299	191.704	181.628	134.268	74.9472	115.359	101.108	153.658	97.3187	108.555	50.5685	317.805	229.349	262.134
RP1657	1H-Indole-3-Acetic Acid	C10H9NO2	1463-614-658	22.1966	10.2145	38.5408	34.1967	29.1039	18.2775	33.9405	33.2927	42.7849	53.9934	40.6567	22.5592	38.9648	40.5626	39.1793	47.0169	39.888	33.8988	36.7578	46.3493	47.188	47.9627	34.6944	36.2302	31.585	32.7231	40.6743	31.0427	28.8821	60.401	57.7842	37.784
RP87	1-Hydroxy-1-phenyl-3-octadecanone	C24H40O2	HMDB0035679	77.5355	104.685	114.916	151.06	128.397	120.607	98.5686	115.192	134.018	124.652	100.269	111.967	121.431	108.35	122.688	90.2506	62.6965	45.3332	77.287	81.7527	72.9579	68.4362	59.7518	70.4697	59.0272	58.0384	57.7706	50.0685	50.3178	50.4532	49.1025	45.2355
RP2944	1-hydroxy-2-{9-[(3-methylbut-2-enoyl)oxy]-2-oxo-2H,8H,9H-furo[2,3-h]chromen-8-yl}propan-2-yl 3-methylbut-2-enoate	C24H26O8	HMDB0128914	35.9684	577.103	791.714	417.79	104.735	67.38	202.161	238.458	67.3194	2154.84	1074.41	93.2355	145.658	1012.1	429.498	115.72	47.6147	45.0483	25.9254	994.723	265.28	1994.6	82.8508	186.319	43.4197	32.5481	34.1363	64.7448	31.7209	383.218	80.2754	438.657
RP3347	1-Hydroxypyrene	C16H12O	HMDB0013139	52.5396	26.8414	68.856	45.6254	78.6832	51.9523	59.3839	53.035	105.168	74.5286	70.3881	35.7339	81.0128	51.7812	130.295	110.03	57.3307	75.5514	75.3433	78.4345	76.095	28.535	40.357	62.4644	83.3218	113.672	102.905	69.94	63.7276	95.7768	113.207	45.7375
RP1809	1-Linoleoyl-Rac-Glycerol	C21H38O4	1460-750-807	14995.6	907.497	2003.65	1489.96	1966	1377.45	1426.89	1944.03	531.77	1001.07	592.031	853.283	583.396	829.266	418.293	634.488	399.362	342.948	584.428	868.53	390.344	259.545	445.762	327.177	951.768	204.724	298.476	86.4044	954.791	239.357	684.734	266.471
RP1745	1-Methoxy-1H-indole-3-acetonitrile	C11H10N2O	HMDB0040973	67.8509	59.37	87.6639	122.927	68.9078	57.2783	86.5402	78.4941	104.319	152.502	112.707	108.234	90.7999	128.052	97.6076	128.828	90.295	54.5594	68.4694	96.7046	117.826	127.637	104.023	92.7413	116.873	91.1723	98.6447	107.126	146.492	291.28	223.931	172.356
RP165	1-Methylhistidine	C7H11N3O2	HMDB0000001	18.1595	125.242	83.5474	93.7463	98.2124	107.225	115.554	83.7468	118.058	81.1687	90.108	99.6268	107.494	52.8534	83.93	63.0209	16.552	25.6834	16.7115	14.7855	15.7864	18.0686	14.2122	29.654	13.0927	16.6381	10.2174	13.7921	18.0337	13.8438	12.6196	12.5676
TN2689	1-Oleoylglycerophosphoinositol	C27H51O12P	HMDB0061693	148.707	122.892	146.442	129.945	100.809	44.515	128.577	36.5316	377.95	109.736	517.51	370.666	101.124	336.873	439.112	409.285	228.655	254.815	389.49	301.607	298.96	239.913	256.451	251.858	195.898	429.097	268.03	331.833	527.272	416.428	245.206	265.387
RP1921	1-Oleoyl-Sn-Glycero-3-Phosphocholine	C26H52NO7P	1448-1001-1063	42805.5	50137.2	61542.8	48390.7	51980.9	48976.1	51304.3	52062.2	39836.1	41990.3	39999.8	43809.7	48606	41739.3	46319.1	49686.8	55429.5	81699.5	64355.1	117691	111781	74688.4	84554.5	96507.7	62179.7	63450.4	62717.7	38741.5	50559.9	48360	54299.3	51642.9
RP69	1-Palmitoylglycerophosphoinositol	C25H49O12P	HMDB0061695	110.07	22.3996	178.405	86.6482	179.532	193.055	254.795	196.873	218.954	151.926	129.261	164.702	146.685	149.783	175.833	191.131	29.7552	39.2494	27.1508	27.4449	23.6407	14.787	15.3861	15.2285	11.5137	10.5111	10.1496	9.47583	6.28721	10.3042	7.54121	7.311
RP1392	1-Palmitoyl-Sn-Glycero-3-Phosphocholine	C24H50NO7P	1447-349-386	99292.4	75645.4	103494	100008	101230	103036	96137.2	104384	92521.5	86540	79406.1	89735.6	93378.2	82962	76034.7	92244.7	102328	102806	131848	128933	115928	110308	127589	118771	114124	97830.2	121552	82890.5	97259.8	101675	105624	93147.7
RP669	1-Stearoylglycerophosphoglycerol	C24H49O9P	HMDB0061697	185.468	261.686	171.286	165.684	176.57	202.757	169.673	190.931	213.74	209.566	197.744	194.572	189.973	161.161	171.792	172.243	134.174	155.964	151.844	153.221	141.918	148.386	170.221	143.037	152.809	159.224	144.052	131.027	139.053	122.697	121.878	127.936
TN961	1-Stearoylglycerophosphoserine	C24H48NO9P	HMDB0061698	174.511	106.3	218.917	183.928	190.351	245.62	183.222	215.577	237.305	145.592	166.071	148.736	61.6791	144.305	168.732	117.976	121.317	127.583	197.318	154.934	115.941	137.73	133.198	113.521	116.007	141.745	158.236	110.439	148.691	150.911	144.132	112.136
RP346	1-Stearoyl-Sn-Glycerol-3-Phosphocholine	C26H54NO7P	1446-347-384	1630.96	1650.11	1761.04	1741.34	1748.93	1797.92	1653.36	1733.2	1568.13	1955.12	1709.76	1513.28	1557.08	1706.53	35897.4	1683.07	37292.5	43941.4	39462.9	52079.7	42643	42964.7	39660.2	43144	32306.5	56825.7	42037.2	58190.9	38393.3	40929.6	50707.3	47388.8
RP2169	2-(1,2-Diamino-1-propenyl)phenol	C9H12N2O	HMDB0034900	154.173	248.005	153.983	326.555	266.67	268.748	202.43	158.587	431.697	497.395	517.791	644.3	429.493	559.513	400.233	497.622	191.727	50.7936	176.916	224.993	234.09	359.832	101.956	168.408	466.635	413.111	399.062	562.087	765.111	616.61	484.807	404.782
RP2610	2-(14,15-Epoxyeicosatrienoyl) Glycerol	C23H38O5	HMDB0013651	64.7709	70.9147	97.4881	80.4664	86.2112	65.7964	65.4365	72.8555	67.8364	82.604	77.9414	78.188	71.8369	61.2183	93.4959	105.006	63.4791	66.3091	87.5384	69.4358	131.303	101.081	65.9529	76.8508	98.7354	118.721	79.996	78.4646	70.6418	72.4859	94.5498	102.044
RP3213	2-(2,4-dihydroxy-5-methoxyphenyl)-3-(3,7-dimethylocta-2,6-dien-1-yl)-5,7-dihydroxy-6-(3-methylbut-2-en-1-yl)-4H-chromen-4-one	C31H36O7	HMDB0129783	1367.68	1786.01	652.643	1891.68	1376.53	870.967	1797.87	1050.98	1826.29	1136.29	2356.97	1198.55	2023.51	1420.27	866.427	1353.28	1399.23	1070.45	1428.68	2080.87	1918.08	1865.53	1850.57	1605.87	6398.22	956.122	1112.05	2168.37	2700.1	1265.74	725.168	1046.11
RP2389	2-(2,4-dihydroxy-5-methoxyphenyl)-5-hydroxy-8,8-dimethyl-4H,8H-pyrano[3,2-g]chromen-4-one	C21H18O7	HMDB0127441	45.7763	56.9652	61.9197	79.0567	68.7514	84.4786	86.6025	86.2686	91.4001	71.6421	66.4811	70.4946	61.5738	52.9579	76.0442	88.9084	99.8697	87.9483	104.994	84.2519	83.3839	84.2377	69.2252	71.4558	87.9916	106.224	96.2634	42.4048	45.7649	71.4786	69.3928	58.6545
TN2140	2-(2,5-dihydroxy-4-methoxyphenyl)-1-(2,3,4,6-tetrahydroxyphenyl)propan-1-one	C16H16O8	HMDB0125080	448.783	248.7	320.887	244.793	319.381	230.995	589.075	308.235	381.463	402.421	420.439	331.591	86.1683	426.21	471.989	328.976	480.505	283.452	708.763	390.191	458.356	362.278	511.857	455.126	299.47	288.6	346.716	226.386	581.842	494.341	424.04	327.432
TN1230	2-(3,4-dihydroxy-5-methoxyphenyl)-3,5,7-trihydroxy-6-methoxy-4H-chromen-4-one	C17H14O9	HMDB0128749	164.868	171.188	146.554	142.964	140.478	142.586	138.839	153.383	143.369	165.31	151.345	146.246	93.9521	150.617	148.962	142.741	145.906	147.089	147.02	139.18	153.618	168.51	155.19	162.088	161.053	153.532	161.065	147.825	143.408	145.843	173.112	165.443
TN1620	2-(3,4-dihydroxyphenyl)-8-[1-(2,4-dihydroxyphenyl)-2-hydroxy-3-(4-hydroxy-3-methoxyphenyl)propyl]-3,4-dihydro-2H-1-benzopyran-3,5,7-triol	C31H30O11	HMDB0135087	63.348	40.2291	47.6617	36.7716	45.0077	39.5937	49.3896	40.1245	62.2504	44.34	64.2814	49.6188	16.6967	37.5007	50.9072	48.8005	54.8727	46.7797	51.0903	35.681	58.8541	44.0685	65.2049	48.4999	63.2991	60.7846	41.9194	48.6215	48.5335	52.8631	56.2749	47.3385
TN1892	2-(3,4-dihydroxyphenyl)-8-[1-(2,4-dihydroxyphenyl)-3-(3,4-dihydroxyphenyl)-2-hydroxypropyl]-3,4-dihydro-2H-1-benzopyran-3,5,7-triol	C30H28O11	HMDB0135060	9.9134	62.4721	54.7937	34.3346	17.4804	7.96125	37.3085	37.1968	16.2411	115.929	74.7545	15.7162	14.9548	84.2894	30.935	17.2409	14.8159	9.35192	8.6763	49.7236	33.938	85.9108	12.8229	21.8093	14.0439	10.7085	11.5366	15.0689	13.0447	45.4737	18.3516	46.7403
RP690	2-(3-Phenylpropyl)pyridine	C14H15N	HMDB0036173	963.346	965.155	915.284	901.253	901.94	920.362	911.467	925.028	949.038	1003.06	964.15	959.615	942.683	946.888	953.371	942.266	972.203	981.723	977.109	980.383	979.562	983.779	1007.71	1004.73	956.817	955.329	991.143	951.477	925.594	970.39	967.528	937.799
RP3398	2-(7-hydroxy-6-methoxy-3,4-dihydro-2H-1-benzopyran-3-yl)-5-methoxybenzene-1,4-diol	C17H18O6	HMDB0125012	70.5523	69.4154	82.5519	130.474	127.516	107.467	121.219	123.014	123.801	135.331	113.594	101.284	88.636	101.443	90.5681	118.987	132.621	103.148	114.876	133.246	126.609	96.922	100.461	96.9667	142.308	128.448	131.346	132.975	87.9186	106.869	118.506	100.12
TN2462	2-(N-Ethyl-perfluorooctane sulfanamido) acetic acid	C12H8F17NO4S	HMDB0061741	33.9429	15.8477	28.8254	15.9105	34.1718	21.593	31.062	16.8488	39.3833	16.2318	39.3454	23.51	25.7482	21.6099	38.0631	23.6096	27.2448	35.5274	41.293	22.4804	31.7299	15.4357	36.1427	19.4077	28.5639	45.5939	33.426	38.8732	29.0375	19.6182	25.9782	16.5758
TN689	2(R)-hydroxydocosanoic acid	C22H44O3	HMDB0061660	1.19216	0.51633	3.0102	1.38319	2.58263	3.23292	3.6906	1.36282	7.75024	4.08941	12.5697	6.03891	5.04369	7.29406	10.0481	9.32888	7.12281	9.21796	28.2025	5.71759	11.6537	10.9773	14.5814	12.4869	13.1926	14.4187	10.5094	7.44268	50.4657	30.2195	25.6829	22.6304
RP3448	2-(S-Glutathionyl)acetyl glutathione	C22H34N6O13S2	HMDB0060343	109.441	243.724	198.24	203.712	139.139	199.583	170.703	157.406	213.652	215.267	208.584	168.502	129.822	191.56	247.017	159.554	225.227	144.572	185.865	186.833	207.192	422.647	295.297	168.423	179.327	174.197	139.22	322.71	115.826	169.174	165.869	108.569
RP776	2-(sulfooxy)pentanoic acid	C5H10O6S	HMDB0143268	386.622	328.613	391.494	377.198	345.2	330.94	333.047	347.444	427.575	525.533	494.565	443.401	417.15	456.035	433.795	415.189	423.572	415.38	441.144	566.078	607.587	553.126	518.86	488.066	464.029	454.048	525.659	585.308	552.001	642.488	566.768	510.68
RP1214	2,3,4,5,6-Penta-O-acetyl-D-glucose	C16H22O11	HMDB0034223	438.2	397.53	783.301	420.404	361.215	852.914	1087.02	683.131	625.661	847.666	579.833	473.568	447.907	370.023	362.975	330.009	231.715	445.598	455.049	641.359	499.3	297.197	331.18	473.345	484.808	469.588	528.704	426.875	572.422	576.76	515.095	719.667
TN2572	2';,3';-Dideoxyadenosine-5-triphosphate	C10H16N5O11P3	HMDB0060728	60.0352	60.418	52.2466	50.425	53.4708	97.9588	57.4234	59.1821	63.7777	55.0591	57.8016	61.7115	162.177	53.5167	55.142	53.1239	56.0072	60.7753	60.4744	37.3767	52.9696	56.5811	129.135	57.5615	66.1135	54.7949	61.0699	49.8753	60.1408	50.0887	68.1383	58.4468
TN1151	2';,7-Dihydroxy-4';-methoxy-8-prenylflavan 2';,7-diglucoside	C33H44O14	HMDB0036400	86.8071	168.098	106.974	187.595	138.296	134.315	134.556	103.84	238.491	266.943	254.462	285.831	75.729	273.339	197.578	199.94	70.6085	14.6634	61.6432	101.153	80.3085	135.38	33.7878	49.6342	136.575	153.942	118.794	174.927	212.843	237.58	149.003	128.589
RP2719	2';';,6';';-Digalloyliriflophenone 3-C-glucoside	C33H28O18	HMDB0029629	24.5378	32.9985	22.5035	28.8037	45.9367	46.5391	25.4054	17.8958	28.5469	34.0226	25.9603	39.5063	51.9544	27.3035	56.0653	22.7768	21.6949	37.1947	29.2269	42.6237	38.8743	44.1857	33.2344	25.64	46.2846	26.2119	41.2239	22.6098	34.2188	61.7005	52.6441	43.3273
RP2747	2-[(3,3-dimethyloxiran-2-yl)methyl]-5-methoxybenzene-1,3-diol	C12H16O4	HMDB0124920	66.7697	62.4736	99.8461	80.5724	130.074	90.8528	93.7146	95.1265	116.389	126.326	91.7677	63.004	71.6812	84.2556	103.04	117.631	94.0427	100.639	90.5717	233.941	100.168	82.9142	87.002	101.306	105.898	103.503	116.323	123.328	134.915	119.319	171.351	147.792
RP2603	2-[(4-hydroxyphenyl)methyl]heptanal	C14H20O2	HMDB0133166	95.039	612.602	419.965	616.557	603.584	726.284	821.974	721.095	773.504	724.927	607.709	555.456	603.541	683.065	575.843	535.102	581.882	702.282	819.738	1026.25	825.168	835.681	625.258	764.585	835.225	742.321	669.514	794.738	453.742	527.288	527.442	630.609
RP2840	2-[(5-hydroxy-1-oxo-1H-isochromen-3-yl)formamido]acetic acid	C12H9NO6	HMDB0128645	172.064	111.054	118.768	107.311	146.254	133.891	142.472	139.599	123.631	200.033	140.406	142.125	114.637	102.721	151.923	182.394	281.686	118.759	175.71	218.838	208.607	154.113	172.898	152.589	109.93	90.9838	125.844	107.26	200.05	119.535	93.0298	105.39
RP2812	2-[(5-Methylsulfinyl)-4-penten-2-ynylidene]-1,6-dioxaspiro[4.4]non-3-ene	C13H14O3S	HMDB0032670	83.3355	114.315	112.162	113.071	125.62	129.805	106.891	125.745	167.574	160.968	174.609	108.596	118.966	106.832	128.119	132.292	96.7491	132.364	144.421	129.33	103.79	119.236	101.43	100.174	118.538	152.149	158.867	189.217	111.297	117.554	101.556	116.06
RP3171	2-[(6-carboxy-3,4,5-trihydroxyoxan-2-yl)oxy]-3-hydroxybutanedioic acid	C10H14O12	HMDB0127956	228.638	274.244	219.035	242.632	192.072	150.017	144.893	129.213	178.341	298.926	263.584	244.069	300.103	221.523	248.916	200.6	212.734	130.786	160.373	223.52	253.42	359.688	232.753	238.218	152.072	130.951	105.009	382.065	153.659	226.137	232.606	227.438
TN2582	2-[2,4-dihydroxy-3-(3-methylbut-2-en-1-yl)phenyl]-2-hydroxyacetic acid	C13H16O5	HMDB0137142	39.1775	41.1389	11.8857	23.3898	9.92577	27.5179	31.1833	29.2754	27.0365	13.9679	12.5881	30.0096	25.4292	8.68291	8.11798	9.79917	30.4677	33.9824	26.4133	16.7192	13.8544	9.93096	11.6381	10.0165	25.8947	14.627	11.7833	9.53458	11.0668	25.4989	15.4951	16.0948
RP2148	2-[3,4-bis(2-hydroxyethoxy)phenyl]-5-hydroxy-7-(2-hydroxyethoxy)-3-{[3,4,5-trihydroxy-6-(hydroxymethyl)oxan-2-yl]oxy}-4H-chromen-4-one	C27H32O15	HMDB0141965	422.5	521.825	681.842	780.802	692.462	669.259	829.725	758.459	801.303	804.697	737.694	739.179	649.834	572.424	708.372	666.346	909.135	689.606	917.122	697.337	780.851	946.281	703.653	653.249	759.12	893.175	660.539	863.356	570.274	756.71	693.16	492.93
TN2678	2-[3,5-dihydroxy-4-(sulfooxy)phenyl]acetic acid	C8H8O8S	HMDB0130454	923.754	991.528	471.302	163.48	1003.36	1014.1	488.315	445.039	744.223	356.75	547.609	823.017	646.285	499.878	970.926	597.61	424.052	893.256	456.233	417.003	556.616	234.664	624.421	572.804	842.406	833.598	1061.28	896.723	791.399	891.16	966.146	929.786
RP1330	2-[4,6-Bis(2,4-dimethylphenyl)-1,3,5-triazin-2-yl]-5-(octyloxy)phenol	C33H39N3O2	HMDB0037802	368.049	270.742	484.619	354.673	328.254	374.401	388.718	377.187	147.903	168.828	114.686	164.052	173.991	157.778	110.292	171.09	337.237	334.557	269.479	438.651	397.238	197.969	268.504	300.488	126.658	110.12	156.199	77.3146	101.796	105.615	106.069	95.9736
TN999	2-[4,6-dihydroxy-2-methoxy-3-(3-methylbut-2-en-1-yl)phenyl]acetic acid	C14H18O5	HMDB0125455	102	143.456	127.611	91.0326	127.982	95.7688	131.065	133.919	127.129	122.808	125.503	95.8425	131.11	126.285	85.2794	83.2497	82.7292	89.8368	85.0218	89.2737	124.228	91.5206	130.407	88.0807	82.8194	122.376	97.6928	89.9165	92.9512	98.1647	132.339	91.1062
RP1891	2-{[(2E)-3-(3,4-dihydroxyphenyl)prop-2-enoyl]oxy}-3-[4-hydroxy-3-(sulfooxy)phenyl]propanoic acid	C18H16O11S	HMDB0124966	89.868	65.6058	83.6076	91.0384	69.4058	59.9174	96.5267	95.5041	101.36	88.4253	82.6445	92.2709	88.3807	52.4077	63.9765	90.0518	129.58	84.7597	127.481	120.499	122.894	91.0081	97.1225	96.3265	90.1139	78.2705	103.501	82.2045	123.662	71.5224	77.1323	68.1525
RP2967	2-{[5,7-dihydroxy-2-(3-hydroxyphenyl)-5H-chromen-3-yl]oxy}oxane-3,4,5-triol	C20H19O9	HMDB0127911	163.01	118.616	111.776	110.562	113.024	49.3108	29.6741	29.3712	45.5834	69.4199	57.66	90.6439	137.329	89.2072	115.191	105.165	86.8599	27.6182	45.682	81.567	166.35	131.326	149.158	163.034	54.8661	22.0347	39.4126	51.4159	68.76	80.2399	90.1362	125.93
RP2976	2-{[5,7-dihydroxy-2-(4-hydroxy-3-methoxyphenyl)-5H-chromen-3-yl]oxy}-6-(hydroxymethyl)oxane-3,4,5-triol	C22H23O11	HMDB0127935	175.632	267.373	237.418	262.009	192.315	160.446	166.635	133.366	113.218	196.837	206.225	236.013	264.263	239.715	282.317	216.466	231.242	154.653	164.471	151.88	217.947	424.129	238.572	246.607	160.377	172.073	61.6915	174.929	114.657	196.315	207.071	193.083
RP3189	2-{[5,7-dihydroxy-2-(4-hydroxy-3-methoxyphenyl)-5H-chromen-3-yl]oxy}oxane-3,4,5-triol	C21H21O10	HMDB0127920	75.5189	64.0251	55.7495	55.6857	81.344	43.1331	56.4475	50.0952	74.6117	50.8046	76.7911	72.5794	106.745	40.5138	58.0703	65.3096	61.6993	74.8352	107.93	66.3556	69.0117	62.9162	62.2034	66.5258	50.7919	71.3471	78.0854	97.8604	94.1002	73.6033	75.8386	56.3248
RP2316	2-{[hydroxy(2,3,4-trimethoxyphenyl)methylidene]amino}acetic acid	C12H15NO6	HMDB0142117	108.288	76.2487	119.703	139.197	122.08	106.4	114.585	132.948	149.776	43.7216	95.1201	106.78	102.26	101.22	100.867	114.797	133.174	101.549	156.777	56.0566	129.147	115.132	121.555	130.634	128.618	125.079	114.249	103.919	139.928	139.59	149.357	138.954
TN616	2-{[hydroxy(2,4,6-trihydroxyphenyl)methylidene]amino}acetic acid	C9H9NO6	HMDB0125157	51.4587	22.8025	39.1173	44.5127	33.7852	33.3833	53.1508	48.6189	63.1681	28.1064	47.3461	43.7728	52.8605	40.7897	41.4281	62.407	77.5409	69.0931	94.3066	52.9092	64.9351	41.1788	64.3786	56.5071	63.3761	85.7055	61.3456	65.9243	77.5303	57.7386	58.3209	65.3652
TN1115	2-{[hydroxy(3-hydroxy-4-methoxyphenyl)methylidene]amino}acetic acid	C10H11NO5	HMDB0140926	83.6763	67.4939	72.8567	101.162	76.1675	59.82	79.7509	64.7207	70.6664	53.4638	79.4215	54.949	79.6972	64.7985	73.2612	60.1328	66.2111	53.307	61.6742	48.7363	73.1087	44.033	77.0352	56.6725	63.7432	69.9961	56.5956	64.9176	57.2085	84.3546	75.6459	52.424
TN694	2-{[hydroxy(3-methoxyphenyl)methylidene]amino}acetic acid	C10H11NO4	HMDB0127991	982.621	919.601	908.67	819.491	932.938	824.699	940.649	891.996	1017.06	980.433	1108.15	925.294	656.187	896.931	981.866	945.452	945.796	956.099	963.234	827.548	1030.41	1014.41	1185.08	1040.51	1180.6	1158.85	1001.06	975.916	1032.03	1141.59	1109.12	1070.17
TN662	2-{[hydroxy(4-methoxy-1-benzofuran-5-yl)methylidene]amino}acetic acid	C12H11NO5	HMDB0129408	215.5	133.953	232.262	324.868	122.285	116.242	241.416	272.29	115.488	275.596	119.482	157.261	72.4056	175.958	78.8742	159.835	315.798	219.981	282.831	406.172	464.606	343.713	403.502	355.287	243.337	199.539	265.296	93.8784	205.113	556.696	557.423	628.103
RP2578	2-{[hydroxy(6-hydroxy-1-oxo-1H-isochromen-3-yl)methylidene]amino}acetic acid	C12H9NO6	HMDB0128642	208.425	145.506	143.906	133.886	206.403	94.0742	134.9	113.418	115.665	175.334	121.159	208.429	172.309	102.269	192.729	250.819	179.142	103.66	119.113	177.876	287.906	163.246	193.004	213.706	106.976	102.181	121.236	98.7385	180.45	178.874	109.99	143.734
RP2574	2-{[hydroxy(6-hydroxy-2H-1,3-benzodioxol-5-yl)methylidene]amino}acetic acid	C10H9NO6	HMDB0129401	361.418	327.138	234.306	280.75	367.114	398.852	259.135	271.948	299.877	189.736	343.666	231.553	243.485	210.58	365.587	322.571	274.183	386.636	354.14	289.999	245.571	245.8	290.872	267.829	278.772	296.022	301.173	312.849	362.24	316.72	289.743	255.96
RP1658	2-{2,6-dihydroxy-4-[6-hydroxy-7-(3-methylbut-2-en-1-yl)-1-benzofuran-2-yl]-3-methoxyphenyl}-6-(2,4-dihydroxyphenyl)-4-methylcyclohex-3-ene-1-carboxylic acid	C34H34O9	HMDB0126228	45.5532	61.3417	28.1159	59.9587	46.0089	23.6765	40.1647	30.3331	45.1578	29.3723	67.8073	24.4909	51.0684	37.127	22.9786	34.5626	31.5788	25.4216	32.5059	42.5	33.9149	41.0481	32.548	40.8352	64.075	22.8696	27.686	41.1563	48.6414	30.9401	18.0003	24.749
TN2321	2-{6-[2,4-dihydroxy-3-(3-methylbut-2-en-1-yl)benzoyl]-5-(2,4-dihydroxy-5-methoxyphenyl)-3-methylcyclohex-2-en-1-yl}-5-[(E)-2-(2,4-dihydroxyphenyl)ethenyl]benzene-1,3-diol	C40H40O10	HMDB0126343	20.81	11.1397	17.1755	25.7489	14.941	10.0325	11.9509	19.6842	21.3401	9.6335	19.1993	14.061	13.8636	11.8197	12.2088	17.7365	21.3692	10.2368	21.2286	30.2223	19.2849	14.4821	12.7802	25.4563	28.6612	12.9275	12.5328	28.9195	17.8271	17.2486	9.18955	9.85187
TN1059	2-{6-[2,4-dihydroxy-3-(3-methylbut-2-en-1-yl)benzoyl]-5-(2,4-dihydroxyphenyl)-3-methylcyclohex-2-en-1-yl}-5-[(E)-2-(2,4-dihydroxyphenyl)ethenyl]-4-methoxybenzene-1,3-diol	C40H40O10	HMDB0126353	115.679	135.43	64.7437	110.04	95.8142	76.713	119.642	85.5987	107.083	88.6148	141.252	89.0552	70.4694	95.4287	71.3406	87.4866	92.6695	65.4901	71.0358	87.3205	115.028	93.8352	100.847	83.1569	130.043	67.2001	73.3935	95.2778	112.404	87.8263	45.4091	69.4484
TN1698	2-{9-hydroxy-2-oxo-2H,8H,9H-furo[2,3-h]chromen-8-yl}propan-2-yl (2E)-3-(2,4-dihydroxyphenyl)prop-2-enoate	C23H20O8	HMDB0128948	39.9659	76.2048	60.3682	68.7365	35.0784	54.8967	54.0144	57.7375	39.202	112.866	52.6928	48.2111	8.1083	76.5971	48.5846	50.6695	44.0433	27.5604	25.5166	55.8018	35.1253	85.511	33.7315	30.9046	30.6222	29.0755	22.1962	26.637	30.0264	49.7459	37.8919	52.0907
RP1065	20beta-Hydroxyursolic acid	C30H48O4	HMDB0035107	251.978	168.506	233.075	213.305	236.994	239.568	229.862	227.607	243.964	205.44	170.161	230.421	193.739	208.473	184.333	227.185	211.723	204.379	230.358	225.802	232.946	186.7	211.151	150.465	166.956	151.771	224.068	139.723	202.817	152.339	151.867	164.474
TN319	20-dihydroxyleukotriene B4	C20H32O6	HMDB0012635	28.6257	10.0086	27.7562	22.8792	19.6052	24.26	27.2478	23.2785	15.9558	22.1493	19.2738	24.0961	4.95907	15.6522	12.6018	18.2347	17.5629	15.9534	15.8359	15.5239	11.9325	9.42309	16.1285	9.90647	10.5849	7.85305	17.1642	5.06043	6.75066	9.65589	5.61349	2.49926
RP2779	20-HDoHE	C22H32O3	HMDB0060048	138.759	159.618	92.0675	186.311	84.4099	143.022	139.605	188.168	179.923	189.412	218.45	259.49	96.029	204.068	174.641	213.101	201.309	156.483	260.485	196.382	174.593	64.3425	187.607	206.599	283.861	179.684	165.985	188.689	299.123	40.8002	154.374	171.386
TN1324	20-HETE ethanolamide	C22H37NO3	HMDB0013630	6.90426	5.91052	30.6941	21.1487	25.9741	40.8907	39.107	26.5024	58.1098	29.8529	57.478	45.9621	7.55659	45.2988	37.3337	36.8986	34.0673	32.9112	60.0303	30.441	34.8227	24.6903	22.9075	28.0093	43.7127	47.4961	50.3854	23.0933	472.431	253.579	193.788	191.979
TN836	20-Hydroxy-PGF2a	C20H34O6	HMDB0004049	46.126	35.9512	55.5699	49.0187	61.1523	60.8704	52.357	54.6682	43.7196	41.8732	35.4382	37.9621	16.9052	35.3102	34.3874	49.0502	41.0696	44.6552	49.1473	56.8045	41.5166	32.2768	37.4778	45.3203	42.5635	32.8526	41.1155	28.6227	30.3326	31.446	25.9618	29.8899
TN2726	20-Trihydroxy-leukotriene-B4	C20H32O7	HMDB0012643	152.597	40.5896	110.459	87.5563	148.519	193.18	137.246	178.023	248.107	53.2661	180.888	115.373	20.6581	212.542	596.349	395.646	138.258	70.1501	30.5124	74.1548	113.188	75.9305	122.254	53.9571	247.296	267.98	89.7788	307.717	309.518	87.777	154.989	609.216
RP2423	22alpha-Hydroxyerythrodiol	C30H50O3	HMDB0034549	16.34	16.229	9.44239	19.0606	19.7752	16.9644	11.8415	19.4611	28.2152	11.4458	24.2812	26.1432	20.2083	20.1424	17.3679	25.1829	12.3411	31.6932	22.0483	9.6037	9.83723	6.39894	19.0432	10.1182	19.9087	20.771	23.5405	29.4935	30.3906	16.9316	11.8506	9.27085
TN394	24-Acetyl- 25-cinnamoylvulgaroside	C36H48O8	HMDB0041368	149.361	118.923	162.027	145.294	151.278	132.122	132.115	125.895	102.664	123.851	111.41	101.781	42.1907	129.654	83.7984	96.644	91.9342	92.9274	81.1513	116.791	108.109	106.227	96.098	93.538	75.1537	78.1158	91.2756	65.2546	66.7682	77.8674	55.751	88.131
RP1366	24-Methylenepollinastanone	C28H44O	HMDB0032083	56.8924	44.7344	64.2024	69.0233	82.2451	70.2221	74.1531	65.2626	3.14809	2.53926	5.46172	4.31998	4.22152	2.01405	3.87216	1.46589	71.8197	94.6589	86.6398	84.8526	97.7139	61.6752	60.1957	75.7945	3.60469	4.13032	3.86121	1.70407	1.51407	1.72971	1.0096	1.86149
RP2562	25-Azacholesterol	C26H45NO	HMDB0001028	117.025	115.365	61.1817	260.103	110.574	78.0142	180.122	140.512	201.497	71.9131	173.853	101.195	137.907	321.01	224.761	240.797	195.718	237.564	576.882	206.563	193.23	177.263	342.464	140.715	474.159	119.896	132.578	543.675	534.024	126.229	80.4825	85.742
RP603	2-acetyl-1-alkyl-sn-glycero-3-phosphocholine	C26H54NO7P	HMDB0062195	63.1263	606.312	268.06	616.177	541.302	608.789	628.293	526.195	520.683	470.58	456.195	409.354	491.934	450.309	282.554	409.533	122.523	93.4895	124.89	138.578	117.542	100.4	82.4687	110.905	87.1776	74.8825	101.912	96.0128	102.179	87.831	89.3935	98.4364
TN1850	2-Amino-3-carboxymuconic acid semialdehyde	C7H7NO5	HMDB0001330	105.492	138.344	107.925	110.182	109.346	83.3827	93.2985	90.1152	87.3076	89.6235	99.6478	93.5272	9.04354	91.8894	108.802	89.9615	91.799	74.6023	56.275	126.481	115.681	116.1	100.537	95.7319	94.4411	72.5572	78.1551	136.744	120.187	154.039	141.467	164.444
TN2122	2-amino-4-({1-[(carboxymethyl)-C-hydroxycarbonimidoyl]-2-({2,3,4,6-tetrahydroxy-5-[(2E)-3-(4-hydroxyphenyl)prop-2-enoyl]phenyl}sulfanyl)ethyl}-C-hydroxycarbonimidoyl)butanoic acid	C25H27N3O12S	HMDB0126628	41.4494	32.905	43.5086	39.4233	41.5241	28.6048	45.5202	28.8624	42.4287	38.1681	46.8515	29.2684	10.8294	35.5461	41.768	35.6572	43.9773	31.0708	40.9443	38.1758	50.1083	39.167	39.0561	37.6333	33.7077	39.9836	35.226	35.1821	37.8484	46.6004	51.133	38.4123
TN2324	2-amino-4-({1-[(carboxymethyl)-C-hydroxycarbonimidoyl]-2-({2,3,6-trihydroxy-5-[(2E)-3-(4-hydroxyphenyl)prop-2-enoyl]-4-{[3,4,5-trihydroxy-6-(hydroxymethyl)oxan-2-yl]oxy}phenyl}sulfanyl)ethyl}-C-hydroxycarbonimidoyl)butanoic acid	C31H37N3O17S	HMDB0126624	28.1805	30.4935	33.4665	26.8427	24.6064	18.8536	37.3596	25.0229	35.6027	18.2712	36.2961	26.476	7.73372	21.3255	33.4799	28.1931	29.4588	20.1917	19.3526	23.3452	25.4791	24.4974	24.2841	20.9314	29.0961	35.3944	21.9542	23.8002	26.4966	29.7011	27.5	23.6679
TN1913	2-amino-4-({1-[(carboxymethyl)-C-hydroxycarbonimidoyl]-2-({4-[(8-{2-[(2-hydroxyacetyl)oxy]propan-2-yl}-2-oxo-2H,8H,9H-furo[2,3-h]chromen-9-yl)oxy]-3-methyl-4-oxobutan-2-yl}sulfanyl)ethyl}-C-hydroxycarbonimidoyl)butanoic acid	C31H39N3O14S	HMDB0129109	66.3752	58.6653	53.4464	94.095	51.9315	44.9853	36.1633	41.7985	57.036	26.1776	99.7514	55.8899	53.4228	38.3645	49.6925	81.3329	60.9354	45.131	47.5513	56.6334	67.4844	61.5123	47.3326	65.6061	136.457	46.6117	5.68623	110.437	84.2044	30.6511	4.62197	20.8108
TN677	2-amino-4-({1-[(carboxymethyl)-C-hydroxycarbonimidoyl]-2-({4-hydroxy-6-[3-(4-hydroxyphenyl)-3-oxoprop-1-en-1-yl]-5-methoxy-2,2-dimethyl-3,4-dihydro-2H-1-benzopyran-3-yl}sulfanyl)ethyl}-C-hydroxycarbonimidoyl)butanoic acid	C31H37N3O11S	HMDB0125884	182.934	131.761	163.307	134.441	115.327	112.727	138.835	110.604	96.2598	95.5004	97.2949	79.2306	33.0473	91.9164	70.3754	74.1784	125.036	139.158	147.453	165.756	154.078	121.946	145.812	145.095	157.263	146.841	162.77	86.2672	163.261	151.413	117.628	106.525
TN842	2-amino-4-({1-[(carboxymethyl)-C-hydroxycarbonimidoyl]-2-({4-hydroxy-6-[3-(4-hydroxyphenyl)-3-oxopropyl]-5-methoxy-2,2-dimethyl-3,4-dihydro-2H-1-benzopyran-3-yl}sulfanyl)ethyl}-C-hydroxycarbonimidoyl)butanoic acid	C31H39N3O11S	HMDB0125909	36.7625	35.977	26.9119	27.1115	32.1172	41.0308	20.9327	24.8215	22.9781	20.8805	21.5351	24.714	10.3477	24.8859	22.5954	19.3259	25.8015	28.2307	25.5917	30.6435	31.5948	34.956	38.3789	35.2842	31.5433	40.9303	36.1848	24.1801	36.2255	28.1997	15.5044	34.1095
RP2563	2-amino-4-({1-[(carboxymethyl)-C-hydroxycarbonimidoyl]-2-({5,10-dihydroxy-8,8-dimethyl-2-oxo-4-phenyl-2H,8H,9H,10H-pyrano[2,3-h]chromen-9-yl}sulfanyl)ethyl}-C-hydroxycarbonimidoyl)butanoic acid	C30H33N3O11S	HMDB0126128	144.19	209.002	122.073	175.373	123.576	137.804	138.897	148.561	147.539	104.283	172.397	221.214	112.425	118.01	101.588	143.464	178.226	145.99	153.926	113.461	142.627	162.481	167.283	157.64	125.461	92.3766	107.41	135.108	130.075	99.7878	71.6688	78.8287
RP1170	2-amino-4-({1-[(carboxymethyl)-C-hydroxycarbonimidoyl]-2-({5,9-dihydroxy-8,8-dimethyl-2-oxo-4-phenyl-2H,8H,9H,10H-pyrano[2,3-h]chromen-10-yl}sulfanyl)ethyl}-C-hydroxycarbonimidoyl)butanoic acid	C30H33N3O11S	HMDB0126127	26.8164	33.4562	49.1531	36.4131	42.4233	41.2379	28.0402	45.8884	36.014	43.5398	30.7425	41.8247	30.7858	50.0181	34.4367	37.1127	23.1824	20.6715	14.8759	80.0825	56.5386	17.7686	38.1497	37.4496	25.6039	11.1745	26.6739	13.3911	11.2309	34.9894	48.476	25.7142
TN5	2-amino-4-({1-[(carboxymethyl)-C-hydroxycarbonimidoyl]-2-[(1-hydroxy-3-oxo-1-phenylbutan-2-yl)sulfanyl]ethyl}-C-hydroxycarbonimidoyl)butanoic acid	C20H27N3O8S	HMDB0133763	3.91968	5.33387	4.52722	4.04852	4.65055	4.6713	5.13685	3.92605	2.99196	3.86634	5.53436	3.70008	2.87318	3.96878	4.25634	4.96425	17.5331	18.4815	17.2732	18.7801	18.3155	22.4428	18.4536	20.078	14.8423	17.6985	20.7959	20.241	15.5822	19.4649	18.7369	17.8892
TN127	2-amino-4-({1-[(carboxymethyl)-C-hydroxycarbonimidoyl]-2-[(2-hydroxy-5-oxo-1,7-diphenylheptyl)sulfanyl]ethyl}-C-hydroxycarbonimidoyl)butanoic acid	C29H37N3O8S	HMDB0133948	137.145	83.3258	58.1458	78.0237	61.3068	121.137	76.2704	91.7055	93.5125	20.9802	95.69	41.0004	68.7625	104.364	50.331	76.3336	28.0474	27.2761	26.1743	7.05182	14.0328	18.9527	37.3154	34.8253	18.1593	30.1476	20.18	19.3817	18.787	16.7387	13.6149	14.6601
TN1356	2-amino-4-({1-[(carboxymethyl)-C-hydroxycarbonimidoyl]-2-[(4-{4-[(E)-2-(2,4-dihydroxyphenyl)ethenyl]-2,6-dihydroxyphenyl}-3-hydroxy-2-methylbutan-2-yl)sulfanyl]ethyl}-C-hydroxycarbonimidoyl)butanoic acid	C29H37N3O11S	HMDB0125580	120.549	96.2342	123.636	93.5101	94.1483	86.6524	86.5365	84.5343	62.5307	86.6739	68.0037	51.1325	27.6878	74.778	54.058	53.1768	79.2155	86.2382	72.5123	111.797	113.685	76.0184	86.4059	92.6218	89.6097	76.6274	93.0561	65.352	84.5694	81.2372	86.6572	81.6943
TN2510	2-amino-4-({1-[(carboxymethyl)-C-hydroxycarbonimidoyl]-2-{[1-(2,5-dihydroxyphenyl)-3-oxopropyl]sulfanyl}ethyl}-C-hydroxycarbonimidoyl)butanoic acid	C19H25N3O9S	HMDB0134058	165.653	147.322	80.7937	210.231	42.6894	111.065	223.51	200.617	59.1629	151.437	124.861	154.835	18.727	193.141	45.9212	72.7974	196.638	56.0051	107.672	58.2628	127.482	162.56	154.104	171.676	112.218	60.3565	27.343	99.1029	186.596	130.39	97.5813	137.647
TN1029	2-amino-4-({1-[(carboxymethyl)-C-hydroxycarbonimidoyl]-2-{[1-(4,5-dihydroxy-2,3-dimethoxyphenyl)-3-oxopropyl]sulfanyl}ethyl}-C-hydroxycarbonimidoyl)butanoic acid	C21H29N3O11S	HMDB0128696	100.907	101.697	113.145	118.96	96.6923	86.5499	113.074	104.158	115.595	109.015	130.855	91.4368	21.4727	112.515	111.879	116.588	119.157	95.3861	86.2471	115.829	135.756	104.728	124.917	111.768	129.37	153.326	107.925	111.681	119.43	142.208	149.506	129.812
TN2399	2-amino-4-({1-[(carboxymethyl)-C-hydroxycarbonimidoyl]-2-{[1-(4-hydroxyphenyl)-3-oxopropyl]sulfanyl}ethyl}-C-hydroxycarbonimidoyl)butanoic acid	C19H25N3O8S	HMDB0135288	150.02	276.799	103.601	44.5675	165.413	95.8607	120.589	97.0913	145.038	33.5963	75.3481	100.339	60.2092	61.1714	130.375	97.326	61.7292	136.915	131.23	75.8982	103.423	21.0848	118.643	61.8438	148.139	130.329	118.172	109.121	67.6007	186.303	165.45	89.8456
TN1586	2-amino-4-({1-[(carboxymethyl)-C-hydroxycarbonimidoyl]-2-{[1-(4-methoxyphenyl)-3-oxopropyl]sulfanyl}ethyl}-C-hydroxycarbonimidoyl)butanoic acid	C20H27N3O8S	HMDB0135654	28.5735	286.011	195.64	200.769	66.8157	36.2629	138.883	143.759	48.4281	228.603	235.648	49.7229	95.7012	338.427	135.075	58.4611	46.3247	12.7796	20.6167	201.392	73.6588	295.298	31.6303	77.3504	66.3885	41.1834	42.2959	38.2313	45.0513	152.921	64.1566	182.359
RP1733	2-amino-4-({1-[(carboxymethyl)-C-hydroxycarbonimidoyl]-2-{[1-(6,7-dimethoxy-2H-1,3-benzodioxol-5-yl)-1-hydroxy-3-oxopropan-2-yl]sulfanyl}ethyl}-C-hydroxycarbonimidoyl)butanoic acid	C22H29N3O12S	HMDB0128693	101.307	121.265	295.345	180.489	100.631	32.5909	82.0824	21.7814	23.7939	332.254	121.916	92.2579	219.49	134.018	113.649	71.5727	11.1185	8.8252	7.76286	267.077	94.2182	58.1312	53.9234	59.148	11.6197	9.01227	14.0831	10.3139	78.2808	182.675	210.077	203.943
RP858	2-amino-4-({1-[(carboxymethyl)-C-hydroxycarbonimidoyl]-2-{[1-(6,7-dimethoxy-2H-1,3-benzodioxol-5-yl)-2,3-dihydroxypropyl]sulfanyl}ethyl}-C-hydroxycarbonimidoyl)butanoic acid	C22H31N3O12S	HMDB0128716	14.0033	12.4389	24.5113	23.0572	18.6618	12.0777	17.9053	29.4571	25.2864	20.8206	20.6833	18.8698	27.166	17.9198	20.4618	28.0274	35.9726	27.4644	25.3259	35.0293	31.5632	36.143	25.6086	33.4268	26.9644	32.9964	31.6973	25.5439	35.9192	32.6928	43.3372	32.2929
TN2007	2-amino-4-({1-[(carboxymethyl)-C-hydroxycarbonimidoyl]-2-{[1-(6,7-dimethoxy-2H-1,3-benzodioxol-5-yl)-3-oxopropyl]sulfanyl}ethyl}-C-hydroxycarbonimidoyl)butanoic acid	C22H29N3O11S	HMDB0128686	14.2873	49.7445	55.291	41.7621	20.7	12.6693	25.855	36.9135	16.8212	93.6454	115.959	15.4883	6.60959	93.1271	44.4039	28.9731	18.3631	11.4011	12.9774	46.6408	39.4394	107.729	15.9364	15.9248	16.5803	10.6692	12.9774	16.8013	16.4543	46.0074	15.3237	42.1882
TN1998	2-amino-4-({1-[(carboxymethyl)-C-hydroxycarbonimidoyl]-2-{[1,3-dihydroxy-1-(7-methoxy-2-oxo-2H-chromen-6-yl)-3-methylbutan-2-yl]sulfanyl}ethyl}-C-hydroxycarbonimidoyl)butanoic acid	C25H33N3O11S	HMDB0130524	88.7696	71.7561	90.2678	60.8534	84.7916	52.8008	90.1496	66.185	105.578	69.9181	111.994	66.2946	34.9687	60.9316	90.224	67.8957	79.0778	64.0736	92.2237	58.9335	99.9233	60.9823	107.646	92.9417	77.1369	98.6751	80.6995	73.0609	86.8821	67.5628	99.06	66.3303
TN902	2-amino-4-({1-[(carboxymethyl)-C-hydroxycarbonimidoyl]-2-{[1,3-dihydroxy-4-(7-methoxy-2-oxo-2H-chromen-8-yl)-2-methylbutan-2-yl]sulfanyl}ethyl}-C-hydroxycarbonimidoyl)butanoic acid	C25H33N3O11S	HMDB0132698	54.3479	44.6114	46.3388	54.5953	44.9461	44.4166	43.3935	49.2206	45.9804	77.9214	57.1197	47.9041	27.8421	69.7117	35.2723	63.1626	46.851	60.4053	41.8284	79.7146	64.201	62.0788	52.127	59.3876	103.367	58.9969	91.2565	78.2146	49.6223	104.52	64.1134	77.5664
TN910	2-amino-4-({1-[(carboxymethyl)-C-hydroxycarbonimidoyl]-2-{[2,3-dihydroxy-1-(7-methoxy-2-oxo-2H-chromen-6-yl)-3-methylbutyl]sulfanyl}ethyl}-C-hydroxycarbonimidoyl)butanoic acid	C25H33N3O11S	HMDB0130525	34.6777	40.884	36.3291	28.0652	32.9441	27.2679	34.9314	30.1326	44.0695	32.3792	46.1016	34.9754	9.19217	29.8327	39.9355	37.6642	41.0623	33.2685	31.8544	35.7029	43.7493	36.6192	43.7558	41.4312	45.6002	42.5421	34.6007	39.3935	40.6885	40.4779	50.0521	42.0714
TN2352	2-amino-4-({1-[(carboxymethyl)-C-hydroxycarbonimidoyl]-2-{[2-hydroxy-3-(4-hydroxy-2-methoxyphenyl)-1-phenylpropyl]sulfanyl}ethyl}-C-hydroxycarbonimidoyl)butanoic acid	C26H33N3O9S	HMDB0130358	38.9016	26.0451	33.3171	29.5645	20.5491	23.2242	33.6652	26.1142	27.5488	27.9593	31.0694	27.8781	4.44793	28.1259	30.4707	29.1192	25.5327	30.5548	25.1612	26.5287	23.7165	24.7672	31.642	24.7146	27.5712	30.3027	28.5421	23.25	32.8272	33.3902	35.0023	28.5
RP3118	2-amino-4-({1-[(carboxymethyl)-C-hydroxycarbonimidoyl]-2-{[3-hydroxy-2-methyl-4-({7-oxo-7H-furo[3,2-g]chromen-4-yl}oxy)butan-2-yl]sulfanyl}ethyl}-C-hydroxycarbonimidoyl)butanoic acid	C26H31N3O11S	HMDB0129421	133.437	218.775	232.662	281.698	183.911	116.211	138.246	86.2723	69.9262	142.411	147.212	198.273	224.362	235.488	328.227	240.067	240.463	122.24	129.244	127.953	179.676	469.073	275.899	239.041	185.153	172.25	34.1749	124.694	72.2159	202.923	229.176	198.655
TN793	2-amino-4-({1-[(carboxymethyl)-C-hydroxycarbonimidoyl]-2-{[3-hydroxy-3-methyl-1-({7-oxo-7H-furo[3,2-g]chromen-4-yl}oxy)butan-2-yl]sulfanyl}ethyl}-C-hydroxycarbonimidoyl)butanoic acid	C26H31N3O11S	HMDB0129420	42.3048	33.7217	34.7327	41.6474	33.1085	30.8809	41.0913	29.6633	41.9284	45.4296	45.3731	29.7343	23.2463	43.8175	42.1724	40.9556	41.4612	41.9393	36.8958	43.877	43.3116	59.8975	51.5955	36.0628	61.4216	41.2839	54.6071	51.4941	41.0706	49.223	42.8934	42.4171
TN2212	2-amino-4-({1-[(carboxymethyl)-C-hydroxycarbonimidoyl]-2-{[5,9-dihydroxy-8,8-dimethyl-6-(2-methylpropanoyl)-2-oxo-4-phenyl-2H,8H,9H,10H-pyrano[2,3-h]chromen-10-yl]sulfanyl}ethyl}-C-hydroxycarbonimidoyl)butanoic acid	C34H39N3O12S	HMDB0126106	108.086	67.878	95.2356	111.49	79.2809	51.2619	67.3985	73.7914	103.037	50.3425	126.476	64.5996	67.7766	71.5138	66.153	72.8785	96.1881	46.1581	101.998	120.304	95.1758	64.3416	46.04	102.524	111.961	50.6138	47.3552	104.175	85.5235	71.5796	47.5137	42.1974
TN1932	2-amino-4-[(2-{[1-carboxy-2-(6,7-dimethoxy-2H-1,3-benzodioxol-5-yl)-2-hydroxyethyl]sulfanyl}-1-[(carboxymethyl)-C-hydroxycarbonimidoyl]ethyl)-C-hydroxycarbonimidoyl]butanoic acid	C22H29N3O13S	HMDB0128723	37.6493	28.6713	67.5435	36.1893	41.8483	20.5792	54.3508	24.5053	50.0292	30.801	39.9146	22.2174	35.3887	35.9653	44.1378	30.1057	39.0613	26.7102	40.8041	46.805	53.4183	50.3351	54.2586	42.7008	49.1415	46.4453	42.3287	36.6518	37.4828	56.0357	46.1116	52.0106
RP3465	2-amino-4-[(2-{[1-carboxy-2-hydroxy-2-(4-hydroxyphenyl)ethyl]sulfanyl}-1-[(carboxymethyl)-C-hydroxycarbonimidoyl]ethyl)-C-hydroxycarbonimidoyl]butanoic acid	C19H25N3O10S	HMDB0125830	33.0419	40.7622	70.6759	34.6142	34.9512	29.1731	44.1774	40.597	28.6149	70.7905	54.3888	28.297	44.3241	47.5832	38.6212	22.0177	18.8583	34.8648	22.0037	58.56	46.8713	54.7002	37.7607	40.3804	29.1897	29.4536	34.2314	24.7804	35.82	65.2548	75.9324	66.9564
TN720	2-amino-4-[(2-{[2-carboxy-2-hydroxy-1-(2-hydroxyphenyl)ethyl]sulfanyl}-1-[(carboxymethyl)-C-hydroxycarbonimidoyl]ethyl)-C-hydroxycarbonimidoyl]butanoic acid	C19H25N3O10S	HMDB0134092	58.864	40.7869	25.6688	28.1464	46.8032	47.0307	29.0454	29.7021	69.7814	32.5017	89.6237	60.3038	20.2396	35.9063	78.6504	61.453	58.7945	76.987	152.127	25.7638	61.8813	59.9966	51.7973	55.1472	80.5057	108.236	87.2054	94.4361	124.25	154.161	87.2617	122.798
TN1776	2-amino-4-{[2-({4-[5-(2-carboxy-2-hydroxyethyl)-2-hydroxyphenyl]-3-hydroxy-2-methylbutan-2-yl}sulfanyl)-1-[(carboxymethyl)-C-hydroxycarbonimidoyl]ethyl]-C-hydroxycarbonimidoyl}butanoic acid	C24H35N3O11S	HMDB0133280	1790.29	3400.15	2710.09	3701.76	2131.01	2653.18	2940.71	3454.22	2965.21	4362.62	3042.74	3268.25	4.50942	3988.94	3614.81	3312.23	3551.73	2765.9	2757	2849.32	1986.88	4282.69	2004.14	2219.02	2839.14	2856.69	2141.86	2097.3	1374.35	3138.67	935.661	1918.76
TN107	2-Amino-4-hydroxy-6-pteridinecarboxylic acid	C7H5N5O3	HMDB0033136	21.1914	24.9914	27.6038	32.2221	26.2149	22.5209	25.6267	28.3413	28.4919	20.5705	27.4183	28.4085	20.0051	26.2146	27.3144	27.6983	40.9044	36.147	39.6911	37.052	33.035	28.0707	40.7171	37.5264	39.9779	43.0647	41.6708	35.3216	37.716	43.84	35.0453	37.7445
TN2344	2-Amino-4-oxo-4-alpha-hydroxy-6-(erythro-1';,2';,3';-trihydroxypropyl)-5,6,7,8-tetrahydroxypterin	C9H15N5O8	HMDB0012143	154.947	109.075	176.453	182.658	129.388	116.395	175.934	145.147	314.369	206.553	236.357	200.232	99.4166	202.722	232.428	415.231	186.13	128.254	177.534	132.654	175.893	174.353	152.341	156.574	192.751	238.957	169.318	186.387	500.534	252.889	191.107	161.088
TN2488	2-Amino-4-oxo-6-(1';,2';,3';-trihydroxypropyl)-diquinoid-7,8-dihydroxypterin	C9H15N5O6	HMDB0012144	28.4793	96.0334	43.6658	107.252	31.1758	123.477	45.1597	107.314	43.1596	113.643	54.4362	102.508	2.09185	106.272	50.116	112.935	63.2319	74.0977	36.6264	110.661	23.6757	87.8532	42.7622	84.8982	82.9903	35.3358	86.9202	25.9049	148.933	220.959	65.0834	210.766
RP2357	2-amino-6-hydroxyhexanoic acid	C6H13NO3	HMDB0142963	732.634	700.59	698.017	310.763	1024.06	1204.06	440.696	498.529	538.456	272.372	303.585	569.783	648.35	453.419	722.527	595.837	838.309	1006.45	670.569	399.743	588.013	495.696	377.2	821.693	417.823	684.86	426.21	633.2	348.755	310.143	373.01	349.192
TN376	2-Angeloyl-9-(3-methyl-2E-pentenoyl)-2b,9a-dihydroxy-4Z,10(14)-oplopadien-3-one	C26H36O5	HMDB0034064	32.0042	19.5633	35.9732	30.5732	31.7415	33.7779	27.9732	27.7027	26.1782	25.1992	17.3641	24.5175	7.84389	21.2856	16.4641	24.7476	10.2759	22.5592	28.6466	22.1014	17.6442	21.3775	19.033	18.8301	21.463	10.8602	19.3316	5.76371	12.4641	8.42323	4.13488	2.69177
RP59	2-Arachidonylglycerol	C23H38O4	HMDB0004666	3459.43	2984.96	4084.52	3571.88	3486.38	3427.08	3983.14	3554.32	3470.9	3287.97	3288.35	3019.79	3129.55	2962.33	2735.64	3192.26	1219.85	1237.04	964.244	930.715	875.712	905.887	908.836	779.511	860.55	686.682	590.637	743.734	441.78	460.613	401.388	476.371
RP1277	2-benzylheptan-1-ol	C14H22O	HMDB0133179	54.7473	116.062	96.0798	109.196	119.561	134.142	136.777	133.966	132.859	137.225	123.485	140.415	113.957	141.698	136.551	108.957	233.48	259.577	257.444	212.245	178.36	179.031	230.645	179.096	173.968	186.543	160.039	176.845	108.43	119.437	130.611	139.891
TN1135	2-Carboxy-1-[5-(2-carboxy-1-pyrrolidinyl)-2-hydroxy-2,4-pentadienylidene]pyrrolidinium	C15H20N2O5	HMDB0035173	157.475	139.841	141.709	129.432	160.904	145.56	109.714	118.21	102.34	73.8824	95.8201	135.786	21.3593	89.6996	133.405	89.4818	90.2702	86.2752	146.679	151.582	97.803	119.632	107.575	104.967	63.8538	110.346	71.9597	125.802	71.9512	86.9223	57.9208	88.4003
RP2498	2-Carboxy-5,7-dimethyl-4-octanolide	C11H18O4	HMDB0030986	80.2625	37.8949	24.5119	24.3838	23.5446	63.127	23.5644	29.5538	30.5397	14.0961	30.1006	44.3155	24.2022	17.35	24.4018	19.7541	54.0784	58.0297	85.0722	21.6301	26.3017	35.5655	47.77	36.1516	39.8095	26.9437	38.6737	33.1098	65.5045	32.4818	25.6042	13.2703
TN2294	2-Carboxyarabinitol 5-phosphate	C6H13O10P	HMDB0040924	132.549	76.7485	113.652	63.3494	132.28	71.9179	116.819	75.1945	104.22	50.9802	103.354	74.8342	86.9403	64.6183	118.519	78.0254	76.9874	97.3356	122.924	85.0213	140.192	62.592	130.369	83.6063	95.2731	98.9849	74.2592	145.058	85.3136	95.6908	139.473	91.9924
TN2768	2-Chloro-2';-deoxyadenosine-5';-triphosphate	C10H15ClN5O12P3	HMDB0060713	40.68	42.6292	28.4333	13.811	57.6698	51.1307	24.4993	19.3337	48.8555	12.4478	22.746	54.1297	50.7366	31.3602	45.9174	30.4202	27.1573	50.0164	32.5454	36.3511	24.723	11.0896	39.5099	31.3951	36.7806	50.6454	48.0849	46.6761	41.324	42.2765	48.2982	39.573
TN1547	2-Chloromaleylacetate	C6H5ClO5	HMDB0060347	199.695	193.422	232.222	204.579	191.027	214.666	218.076	213.186	182.965	202.275	203.52	216.963	202.816	174.501	207.253	181.061	207.87	203.68	214.614	199.389	185.829	210.786	185.006	189.893	211.075	242.595	205.021	214.048	204.445	201.478	237.605	248.661
TN2106	2-Deoxy-D-galactose	C6H12O5	1374-577-620	453.729	569.012	496.56	465.515	459.506	344.754	431.912	379.549	406.142	418.395	422.273	416.901	65.6549	468.156	460.095	380.884	413.482	329.499	226.942	545.984	524.357	495.491	452.692	436.055	424.343	330.198	341.666	607.868	398.779	627.196	571.527	595.988
TN1835	2-Hydroxy-1,4-benzoxazin-3-one glucuronide	C14H15NO9	HMDB0240438	67.5091	65.0691	47.8492	58.7006	49.7497	68.3076	59.5785	61.4286	52.0998	67.2235	58.0782	56.6718	34.1928	65.4725	51.4124	53.8913	63.0664	52.7727	53.2611	58.7514	54.5572	53.1498	54.1007	60.6459	52.9076	50.1732	63.3624	50.2289	60.7615	62.7858	47.7919	55.7323
RP3438	2-hydroxy-3-[3-(4-hydroxy-3-methylbut-2-en-1-yl)-4-(sulfooxy)phenyl]propanoic acid	C14H18O8S	HMDB0133270	74.1001	88.4124	128.208	102.767	100.52	91.7609	134.611	102.337	133.161	168.001	127.648	86.7	92.3691	116.8	100.168	103.2	118.178	75.2562	117.137	148.867	125.92	110.304	76.9892	97.6479	114.663	103.907	121.873	130.53	124.392	111.679	92.1856	114.071
TN765	2-Keto-glutaramic acid	C5H7NO4	HMDB0001552	42.0464	42.2665	36.1863	40.6291	34.5934	36.5773	33.7956	44.3755	27.4832	50.2132	29.2344	41.3337	19.3773	53.1316	34.1131	49.3693	36.411	29.6385	25.2928	45.5358	35.1927	34.763	36.9667	30.9551	28.4855	23.5512	32.0505	27.0983	29.1025	38.3327	20.7758	25.4955
RP2247	2-Methyl-1,4-naphthalenediol bis(dihydrogen phosphate)	C11H12O8P2	HMDB0032721	166.655	163.981	131.61	145.241	148.378	148.761	155.607	160.713	149.476	67.2499	125.647	172.553	158.473	136.667	140.844	127.648	139.887	115.668	96.0701	115.512	153.939	122.255	148.119	147.182	145.212	131.09	121.845	141.717	140.35	140.199	149.138	136.184
TN926	2-Methyl-2-(methyldithio)propanal	C5H10OS2	HMDB0038889	1808.76	1408.81	1322.42	1531.34	1418.66	1512.5	1475.65	1620.01	1565.34	1280.62	1577.03	1709.29	355.037	1586.67	1525.4	1702.28	1765.03	1654.67	1940.65	1778.35	1676.74	1495.51	1923.76	1607.68	1733.69	1688.78	1544.52	1771.79	1543.54	1941.31	1528.63	1418.22
TN1672	2-Phospho-D-glyceric acid	C3H7O7P	HMDB0003391	172.498	91.4884	143.509	58.2605	165.992	78.5265	152.755	75.0041	128.453	53.3746	121.175	70.2743	108.962	52.1366	123.644	66.6096	90.421	98.7907	139.706	106.531	186.268	87.0582	160.992	109.76	77.433	132.067	82.2594	197.687	118.866	85.7658	206.951	114.718
TN1585	2-Stearoylglycerophosphoinositol	C27H53O12P	HMDB0061704	41.3787	26.5529	32.0491	31.9653	25.4744	29.6446	27.8289	29.7983	20.3679	18.7511	20.1637	21.355	6.81892	29.3345	40.8292	43.1065	50.1384	60.8047	71.4326	55.8959	39.5821	28.0597	74.1555	96.8725	40.1424	27.6104	41.2755	16.7267	34.5694	35.5932	38.3511	41.3334
RP1303	2-trans,4-cis-Decadienoylcarnitine	C17H29NO4	HMDB0013325	26.7779	179.748	119.267	146.268	121.837	99.6383	138.7	151.289	160.47	60.7955	65.4374	50.9794	82.9011	70.398	61.1508	52.6932	62.7895	117.578	128.987	87.5078	103.278	99.2932	62.2529	118.212	95.3979	55.2434	43.5344	46.7245	37.0356	45.7731	54.23	50.8499
TN590	3-(1,1-Dimethyl-2-propenyl)-8-(3-methyl-2-butenyl)xanthyletin	C24H28O3	HMDB0030730	47.7241	41.6816	58.0706	54.5235	55.3965	68.0151	51.6041	56.8549	42.6739	36.6127	38.3238	38.9458	16.9475	34.6829	32.9931	37.2521	37.149	30.8789	32.7297	41.3711	40.3827	29.8116	25.2087	42.0482	26.5892	30.0068	35.4165	27.5313	28.8696	27.4438	31.9124	35.2113
TN1258	3-(1-Pyrazolyl)-L-alanine	C6H9N3O2	1324-287-324	25.9493	11.4949	17.2546	23.9791	21.049	24.1975	16.9834	19.8861	15.0241	11.9116	15.4289	24.5843	6.25726	17.8101	17.1504	12.2752	17.0636	14.6567	26.2994	19.0724	12.1345	18.8136	15.2956	19.5044	9.96066	17.6393	12.6004	19.8842	10.0562	10.9587	7.49599	15.504
TN1893	3-(2,4-dihydroxyphenyl)-1-{3-[5-(2,4-dihydroxyphenyl)-6-(5-hydroxy-2,2-dimethyl-2H-chromene-6-carbonyl)-3-methylcyclohex-2-en-1-yl]-2,4-dihydroxyphenyl}propan-1-one	C40H38O10	HMDB0126375	27.2045	34.5091	29.3725	56.0353	22.3824	21.6372	20.9453	22.766	24.4018	13.0527	65.7877	29.9145	29.2615	17.818	26.204	43.5984	27.942	17.9458	24.0373	25.7949	36.8753	27.9693	26.2007	34.0592	75.7055	17.7032	4.89193	57.6035	44.6168	15.8536	3.31694	10.7424
TN1725	3-(2H-1,3-benzodioxol-5-yl)-3-oxopropanoic acid	C10H8O5	HMDB0129376	134.739	135.825	126.742	129.331	128.995	124.252	134.337	126.623	123.201	131.015	121.711	122.446	122.777	130.565	119.597	111.043	118.983	121.848	131.301	126.787	119.764	129.777	117.477	125.329	122.525	132.058	125.806	127.246	131.558	134.176	130.191	130.635
RP2997	3-(3,4-dihydroxyphenyl)-1-methoxy-1-oxopropan-2-yl (2E)-3-(4-hydroxy-3-methoxyphenyl)prop-2-enoate	C20H20O8	HMDB0124950	139.881	150.283	77.6559	88.0886	100.158	131.222	62.2671	91.847	28.4198	32.5395	38.1865	129.536	90.4187	107.835	80.3924	84.8867	133.648	65.511	103.537	27.199	111.847	122.709	84.1996	113.967	83.1834	99.404	39.0078	108.28	109.729	91.2171	41.0172	84.0709
RP753	3-(3,7-dihydroxy-5-sulfino-3,4-dihydro-2H-1-benzopyran-2-yl)-5-methoxybenzen-1-olate	C16H16O7S	HMDB0127800	39.6212	34.4918	39.2947	57.8997	49.5745	41.935	55.769	45.4951	72.3771	50.0744	52.9532	43.4638	57.3748	52.9494	57.8536	47.092	59.7386	67.2526	60.5698	65.9544	71.3612	63.2261	72.8707	65.6323	111.7	76.5989	101.391	60.9271	60.9531	87.4858	93.9158	76.8971
RP2314	3-(3-hydroxyphenyl)-2-phenyl-4-[(E)-2-phenylethenyl]-2,3-dihydro-1-benzofuran-6-ol	C28H22O3	HMDB0129161	52.1208	49.7508	76.2283	76.1707	86.1031	75.6638	89.8289	90.1401	50.559	93.983	65.8085	56.2355	47.4723	61.8183	66.4225	65.3075	74.6623	73.8899	67.3186	86.9411	58.6453	76.9947	52.6971	68.5385	87.8375	81.1711	53.7175	52.322	51.1616	58.0235	57.9227	69.0951
TN2600	3-(5-hydroxy-2,2-dimethyl-2H-chromen-6-yl)-1-phenylpropan-1-one	C20H20O3	HMDB0125856	397.059	378.49	291.879	277.681	267.157	268.435	241.808	408.887	198.61	184.584	139.448	524.473	100.013	300.255	152.203	244.373	263.72	445.268	348.054	363.161	180.136	330.178	264.141	280.06	241.063	143.234	257.138	178.69	384.075	234.401	147.731	242.073
RP303	3-(7-hydroxy-5-methoxy-2,2-dimethyl-2H-chromen-6-yl)-1-phenylprop-2-en-1-one	C21H20O4	HMDB0125853	10.64	147.86	119.477	241.389	223.853	182.588	173.505	203.318	199.248	163.922	114.843	111.564	151.297	139.769	126.296	137.588	11.6203	23.9872	29.5944	27.3639	43.1613	30.0798	28.3332	32.0385	36.765	10.0747	15.4729	12.9412	10.0205	14.1929	12.2003	11.1366
TN2579	3-(7-hydroxy-6-methoxy-2H-1,3-benzodioxol-5-yl)prop-2-enal	C11H10O5	HMDB0128663	52.3514	116.094	74.4425	85.049	69.2794	115.234	65.5397	95.727	62.1946	110.665	83.7827	113.038	103.86	119.459	81.7931	90.5997	74.8349	117.009	50.6894	131.068	34.2589	77.4219	76.4557	97.3251	115.264	70.5095	169.504	64.7072	87.8584	141.907	72.3807	127.534
TN806	3,3-Dichloro-4-(dichloromethylene)-2,5-pyrrolidinedione	C5HCl4NO2	HMDB0034898	11.5964	11.7825	9.98688	8.11698	8.98981	8.9977	8.42976	8.69606	9.61824	7.06039	8.99292	9.90493	8.81167	7.92173	8.21293	5.35264	9.44406	9.31397	10.5691	10.6635	9.59622	9.3545	9.54743	10.7419	11.6632	11.1075	14.1567	10.4875	11.4665	11.512	9.27757	3.13526
TN1146	3,3-Dimethyl-1,2-dithiolane	C5H10S2	HMDB0038974	53.1884	16.8997	130.278	52.2378	100.907	48.1878	67.3342	110.743	193.991	76.1513	114.824	32.7148	28.5885	57.7761	174.448	164.591	113.23	102.524	123.742	233.748	111.557	97.6169	191.947	116.367	71.647	167.356	199.19	119.936	101.258	337.254	239.112	274.652
TN1125	3,4,5-trihydroxy-2-[hydroxy(3,4,5-trihydroxyoxan-2-yl)methyl]-4-[3,4,5-trihydroxy-6-(hydroxymethyl)oxan-2-yl]cyclohexa-2,5-dien-1-one	C18H26O14	HMDB0128223	23.0321	21.0647	46.9163	40.7413	26.5096	14.4553	36.6309	18.8866	23.4503	28.1812	39.3947	13.8976	9.85045	25.926	35.854	23.3808	43.9166	19.7462	29.895	81.3761	56.9859	59.3049	59.4426	51.7381	28.9868	52.9153	30.1673	39.909	42.6888	36.421	44.9303	47.6027
TN2603	3,4,5-trihydroxy-6-({2-[2,4,6-trihydroxy-3-(3-methylbut-2-en-1-yl)phenyl]acetyl}oxy)oxane-2-carboxylic acid	C19H24O11	HMDB0125495	18.4479	383.869	125.656	354.652	34.4046	68.5579	108.553	336.633	58.5541	588.828	326.106	272.269	2.60425	768.583	288.126	301.982	71.9214	31.5593	15.6597	673.096	99.5024	787.234	87.383	341.487	105.921	16.8179	57.2559	28.9495	39.5656	534.774	26.7262	551.334
RP1987	3,4,5-trihydroxy-6-({3-[3-methoxy-4-(sulfooxy)phenyl]prop-2-enoyl}oxy)oxane-2-carboxylic acid	C16H18O13S	HMDB0128060	27.9067	20.0704	29.3811	22.3141	30.16	29.5141	33.0545	56.1513	28.5584	20.3406	18.782	30.8346	28.9116	17.4504	31.1754	24.6617	32.2306	26.0152	30.4989	27.4622	33.7893	13.9777	28.2328	40.8214	29.1585	32.4714	32.4184	74.1019	27.7156	38.09	44.85	30.9838
TN2066	3,4,5-trihydroxy-6-({3-hydroxy-8,8-dimethyl-4-oxo-2-phenyl-4H,8H-pyrano[2,3-f]chromen-5-yl}oxy)oxane-2-carboxylic acid	C26H24O11	HMDB0127416	30.9253	23.3234	50.7086	59.3821	24.6129	31.2257	37.6272	54.8009	63.4488	90.258	136.001	69.8157	24.1351	97.6629	90.6262	127.498	61.3628	43.9667	52.9804	43.5911	90.5613	89.6141	16.0477	49.4678	76.9943	45.7267	52.5112	59.2692	58.6356	61.5821	19.5261	42.2778
TN857	3,4,5-trihydroxy-6-({4-hydroxy-2-methyl-6-[(3,4,5,6-tetrahydroxyoxan-2-yl)methoxy]-5-[(3,4,5-trihydroxy-6-methyloxan-2-yl)oxy]oxan-3-yl}oxy)oxane-2-carboxylic acid	C24H40O20	HMDB0127460	9.52044	20.3732	24.873	46.1469	17.3414	14.9602	32.7392	33.4496	18.9961	3.13137	40.4445	2.86939	1.41095	10.7656	9.74773	38.6062	5.85698	3.36112	18.8539	7.53234	16.5519	8.10875	4.1362	5.30461	56.9088	3.66262	14.0885	10.4885	31.159	10.0238	4.80687	5.73922
TN2392	3,4,5-trihydroxy-6-({7-hydroxy-4-oxo-2-phenyl-3,6-bis[3,4,5-trihydroxy-6-(hydroxymethyl)oxan-2-yl]-4H-chromen-5-yl}oxy)oxane-2-carboxylic acid	C33H38O20	HMDB0127032	52.8033	49.4732	51.1997	37.9109	47.4421	38.0375	54.0575	35.3233	52.7451	42.1193	54.8356	34.5651	11.2426	45.6941	60.678	44.1639	57.6919	35.0805	37.2955	44.4225	58.1184	36.7907	49.3357	37.7034	38.7841	55.0362	34.0837	52.4982	38.4939	48.2583	53.4516	39.7781
TN1516	3,4,5-trihydroxy-6-(1H-indole-3-carbonyloxy)oxane-2-carboxylic acid	C15H15NO8	HMDB0134938	98.7016	62.4582	171.135	66.7367	85.6348	55.8924	131.333	71.2951	96.1168	96.0258	91.6951	98.0257	18.6939	139.717	107.286	112.345	100.189	62.2102	136.57	87.0362	113.831	90.131	109.258	92.9914	126.772	76.4542	59.9211	132.779	272.908	147.07	166.473	272.434
TN2534	3,4,5-trihydroxy-6-(2-hydroxy-1,2-diphenylethoxy)oxane-2-carboxylic acid	C20H22O8	HMDB0135201	170.711	171.552	145.581	214.097	133.239	233.589	147.851	231.132	120.949	323.084	186.092	237.09	128.775	270.485	138.512	257.906	123.468	256.149	106.362	195.238	171.444	142.199	188.565	154.28	351.415	154.803	266.783	196.486	126.444	278.156	187.043	180.591
RP1180	3,4,5-trihydroxy-6-(2-hydroxy-3-methoxyphenoxy)oxane-2-carboxylic acid	C13H16O9	HMDB0128036	93.4561	79.8586	131.498	112.343	114.883	107.692	103.444	111.522	97.595	219.474	94.0903	80.3493	92.2337	109.977	87.357	94.3184	88.6483	74.7565	67.2614	109.702	107.022	84.6751	80.3528	84.622	83.6201	56.5533	99.4005	47.7437	75.4931	83.7418	75.289	69.4803
RP3291	3,4,5-trihydroxy-6-(2-hydroxy-5-{5-hydroxy-7-methoxy-4-oxo-6-[3,4,5-trihydroxy-6-(hydroxymethyl)oxan-2-yl]-4H-chromen-2-yl}phenoxy)oxane-2-carboxylic acid	C28H30O17	HMDB0128553	37.3518	72.2548	59.9394	61.8125	48.1239	62.8455	58.2584	63.5483	67.7074	68.0055	60.4458	51.6544	45.2741	58.0326	78.9786	50.5668	76.9927	46.3648	62.5266	60.4771	64.0171	126.121	94.0403	54.4537	66.0773	56.2497	47.1098	96.2396	41.2984	49.6964	53.9275	32.3022
TN1400	3,4,5-trihydroxy-6-(2-oxo-1,2-diphenylethoxy)oxane-2-carboxylic acid	C20H20O8	HMDB0135189	226.262	258.084	167.664	273.546	181.391	167.697	234.974	186.002	246.627	140.877	208.506	222.184	84.7752	177.689	235.941	233.287	452.811	177.995	250.666	218.542	276.295	328.604	236.549	269.061	284.902	409.347	302.713	252.056	160.818	221.624	207.766	267.326
RP1720	3,4,5-trihydroxy-6-(4-hydroxy-1H-indole-3-carbonyloxy)oxane-2-carboxylic acid	C15H15NO9	HMDB0134950	1358.7	551.747	1365.48	1363.76	1741.13	1448.55	2334.79	1780.02	2093.76	1654.59	1463.67	1176.35	1468.9	1117.88	1612.98	1444.84	2119.16	2086.55	3073.79	1903	1546.47	1068.25	1703.38	1343.35	2093.32	1832.26	2759.52	1297.05	1998.66	2017.55	1808.36	1872.94
TN855	3,4,5-trihydroxy-6-(7-hydroxy-1H-indole-3-carbonyloxy)oxane-2-carboxylic acid	C15H15NO9	HMDB0134947	298.705	333.521	304.073	367.534	277.138	271.53	250.019	296.947	252.481	342.923	275.496	295.231	136.682	363.964	284.153	363.407	340.577	353.548	253.38	466.974	318.229	429.677	343.376	344.108	429.129	312.061	477.548	381.898	322.419	504.309	299.271	466.963
RP3376	3,4,5-trihydroxy-6-[(14-hydroxy-3-methyl-1,7-dioxo-3,4,5,6,7,8,9,10-octahydro-1H-2-benzoxacyclotetradecin-16-yl)oxy]oxane-2-carboxylic acid	C24H30O11	HMDB0134196	96.1279	43.3871	136.865	121.631	103.034	64.7366	116.787	99.7133	113.919	192.082	113.247	118.08	101.769	163.447	117.37	138.248	112.133	90.2613	111.311	162.642	192.353	132.231	97.1334	105.492	130.184	109.988	164.123	62.2175	84.713	131.627	141.822	120.495
TN2232	3,4,5-trihydroxy-6-[(2,3,5-trihydroxy-6-methyloxan-4-yl)oxy]oxane-2-carboxylic acid	C12H20O11	HMDB0124752	20.8594	681.839	723.856	334.282	69.8487	24.0175	213.679	229.47	28.8106	1982.34	765.175	60.3207	93.2877	984.02	260.304	60.9563	23.716	17.6449	12.85	658.38	144.024	1672.43	32.7798	104.349	23.3731	25.8161	21.2562	29.08	20.7639	193.447	29.1234	243.958
TN736	3,4,5-trihydroxy-6-[(3-hydroxybutanoyl)oxy]oxane-2-carboxylic acid	C10H16O9	HMDB0130130	144.761	160.862	102.71	89.086	131.583	143.831	73.1292	82.8319	111.882	134.237	124.714	171.621	58.3605	124.497	170.352	112.306	68.9914	51.4447	68.103	56.3816	59.7876	76.0433	52.3246	79.551	59.0446	138.095	83.0062	88.9454	110.438	114.073	124.769	100.614
TN2459	3,4,5-trihydroxy-6-[(3-methylbut-2-enoyl)oxy]oxane-2-carboxylic acid	C11H16O8	HMDB0128920	159.162	231.874	339.095	309.144	328.23	328.432	361.843	336.755	447.984	295.947	422.684	370.53	108.926	337.83	410.043	443.177	391.252	482.465	502.447	374.15	280.035	285.383	398.562	321.049	372.157	484.754	444.571	366.585	347.147	350.03	258.876	270.049
RP813	3,4,5-trihydroxy-6-[(4-hydroxy-5-methoxy-6,8-dimethyl-2-phenyl-3,4-dihydro-2H-1-benzopyran-7-yl)oxy]oxane-2-carboxylic acid	C24H28O10	HMDB0130654	76.8786	41.4769	67.1835	53.494	57.6217	70.8011	84.5499	55.3818	74.0686	63.3663	47.5018	64.178	74.4777	65.39	61.4468	72.7514	96.6447	82.2832	94.6135	110.201	83.0397	63.7585	83.9783	75.2915	91.784	81.4798	85.4436	68.4593	70.5328	72.0163	88.3385	71.2174
TN2109	3,4,5-trihydroxy-6-[(4-oxo-2-phenyl-4H-chromen-3-yl)oxy]oxane-2-carboxylic acid	C21H18O9	HMDB0134551	141.875	4916.8	4291.5	2669.62	475.195	164.998	1669.18	1766.81	214.149	11164.5	4750.6	493.552	461.097	6443.43	1789.63	496.682	139.999	40.6327	40.0401	4615.06	1053.49	9054.11	246.549	805.726	99.3845	53.311	74.3077	158.614	84.9158	1350.41	204.507	1635.94
TN2502	3,4,5-trihydroxy-6-[(6-hydroxy-7-methoxy-2-oxo-2H-chromen-8-yl)oxy]oxane-2-carboxylic acid	C16H16O11	HMDB0130550	68.986	139.992	138.099	164.411	108.125	65.6734	139.142	126.255	79.6702	149.494	162.523	91.4174	55.8448	187.838	136.142	97.9455	85.5183	67.4108	62.2238	184.648	134.374	174.761	81.5344	118.561	82.4701	70.8205	72.2176	81.6487	81.0701	148.279	91.4307	154.955
TN1796	3,4,5-trihydroxy-6-[(oxolan-2-yl)methoxy]oxane-2-carboxylic acid	C11H18O8	HMDB0126546	61.5039	51.5678	50.8909	42.0475	65.5659	67.032	39.492	46.6428	65.2781	71.1225	65.968	61.5873	31.2812	44.2422	70.495	33.543	39.4031	77.1656	60.223	45.9357	30.5105	60.304	65.0418	60.6174	46.0269	92.9166	98.7357	76.38	42.5834	97.8949	110.282	61.8492
TN867	3,4,5-trihydroxy-6-[2-hydroxy-1-(1-oxo-1H-isochromen-3-yl)butoxy]oxane-2-carboxylic acid	C19H22O10	HMDB0130066	40.4162	42.4335	39.4916	30.6874	28.1518	27.6482	32.4641	29.9865	37.8309	23.1837	40.3701	41.6122	8.7897	32.221	27.63	35.2274	45.3043	49.0914	31.9692	47.9825	27.5474	29.3859	39.4332	26.6146	40.0267	40.2446	36.1189	36.5826	40.12	40.9661	37.2845	33.0979
RP2505	3,4,5-trihydroxy-6-[2-hydroxy-5-(5,6,7-trihydroxy-4-oxo-4H-chromen-2-yl)phenoxy]oxane-2-carboxylic acid	C21H18O13	HMDB0131943	43.3313	193.01	177.336	209.802	88.9346	73.3902	100.615	107.571	62.1236	238.632	190.881	81.8312	112.541	256.244	115.834	41.8244	31.1545	55.3209	28.1726	183.126	77.7977	393.715	49.7305	56.1509	70.2078	54.5418	80.2178	74.9174	66.64	114.193	80.4892	93.3089
RP975	3,4,5-trihydroxy-6-[2-methoxy-4-(3,5,6,7-tetrahydroxy-8aH-chromen-2-yl)phenoxy]oxane-2-carboxylic acid	C22H21O13	HMDB0128126	49.7138	60.0877	52.0894	70.0956	51.7362	38.3384	57.3952	51.4863	37.2822	47.7364	33.2745	34.4539	24.1067	42.8456	23.5719	27.9944	19.0745	18.5343	37.191	38.2066	31.8149	42.4838	31.9774	19.8445	21.1144	16.5277	28.0194	30.7087	15.179	22.1506	25.4437	22.4875
RP3321	3,4,5-trihydroxy-6-[3-(2-hydroxy-2-phenylacetyl)phenoxy]oxane-2-carboxylic acid	C20H20O9	HMDB0135206	54.2947	129.916	120.454	82.7468	57.9051	59.5278	82.1567	80.2609	63.6926	458.515	138.865	71.415	62.7441	165.382	63.9114	67.5718	71.6436	67.6347	62.0661	128.873	92.7978	298.059	80.9285	89.1655	105.96	64.9554	76.286	58.7241	66.2986	98.2707	119.539	136.321
RP2672	3,4,5-trihydroxy-6-[3-(2-methyl-3-oxobut-1-en-1-yl)phenoxy]oxane-2-carboxylic acid	C17H20O8	HMDB0133692	46.4333	28.3973	41.2878	78.6371	40.0507	29.0378	50.0692	38.3376	93.2749	57.3141	75.7459	82.9799	48.503	70.9598	61.1889	67.8912	75.5021	44.6663	90.0994	62.081	58.0675	72.5207	40.4557	36.417	46.4073	59.6616	51.0312	70.7589	50.3397	38.3181	24.2688	25.139
TN2146	3,4,5-trihydroxy-6-[3-hydroxy-2-methoxy-4-(3,5,7-trihydroxy-5H-chromen-2-yl)phenoxy]oxane-2-carboxylic acid	C22H21O13	HMDB0128131	307.16	223.617	141.155	99.3254	142.078	77.4193	171.666	74.4197	260.818	59.9156	227.519	149.819	42.2795	90.4308	147.928	124.312	213.16	141.159	129.725	115.968	155.54	152.431	196.8	152.849	211.357	227.237	164.139	237.218	116.016	136.85	87.3838	105.167
TN1841	3,4,5-trihydroxy-6-[4-(3-oxo-3-{2,3,4-trihydroxy-5-[hydroxy(3,4,5-trihydroxyoxan-2-yl)methyl]-6-oxo-3-[3,4,5-trihydroxy-6-(hydroxymethyl)oxan-2-yl]cyclohexa-1,4-dien-1-yl}propyl)phenoxy]oxane-2-carboxylic acid	C33H42O22	HMDB0128236	27.1678	548.276	267.08	130.487	54.8323	41.2474	136.734	157.28	45.0144	1443.78	501.115	111.162	47.9816	863.482	434.885	96.7097	16.6049	8.07619	8.98737	371.801	108.67	513.73	19.6351	103.8	36.0967	11.7515	29.4984	26.3	34.246	303.191	44.7578	474.434
RP178	3,4,5-trihydroxy-6-{[1-(4-methoxyphenyl)-4-methylpent-1-en-3-yl]oxy}oxane-2-carboxylic acid	C19H26O8	HMDB0132958	22.2613	494.077	321.871	360.088	362.569	414.242	420.297	326.866	448.835	324.963	386.315	398.163	464.997	182.212	384.046	334.995	73.7626	82.6467	71.216	64.7667	71.2398	61.2257	60.8304	87.0668	69.8383	54.406	43.9539	45.7594	48.9654	38.8496	45.6705	47.8083
RP3143	3,4,5-trihydroxy-6-{[1-hydroxy-2-(phenylmethylidene)heptan-3-yl]oxy}oxane-2-carboxylic acid	C20H28O8	HMDB0126523	104.337	74.1601	190.931	120.575	162.414	79.8428	110.449	153.584	115.994	162.661	149.74	162.419	107.15	75.8942	185.63	243.75	97.4243	118.966	159.511	113.054	248.654	143.212	105.245	107.68	197.867	170.193	122.541	122.215	112.087	108.327	153.894	157.978
RP3287	3,4,5-trihydroxy-6-{[2-(9-{[(2E)-2-methylbut-2-enoyl]oxy}-2-oxo-2H,8H,9H-furo[2,3-h]chromen-8-yl)propan-2-yl]oxy}oxane-2-carboxylic acid	C25H28O12	HMDB0129100	16.6504	31.5443	73.0839	49.3065	64.0436	44.8747	75.11	62.0291	130.887	261.33	91.181	33.6322	41.2521	228.312	114.54	93.9204	74.7365	68.0097	82.1826	122.617	70.3762	450.922	47.9765	31.6768	69.6216	98.6872	82.185	108.629	64.644	76.3556	56.2693	28.7749
TN1396	3,4,5-trihydroxy-6-{[3,6,7-trihydroxy-4-oxo-2-(3,4,5-trihydroxyphenyl)-3,4-dihydro-2H-1-benzopyran-5-yl]oxy}oxane-2-carboxylic acid	C21H20O15	HMDB0125292	44.6571	214.112	257.995	161.416	57.2984	18.1033	157.622	101.938	30.0038	304.226	234.643	51.9185	30.4218	321.156	165.299	35.6316	10.3064	10.0117	11.0575	235.225	81.471	197.323	23.1534	49.2856	10.2829	14.4706	6.98353	22.1335	29.0784	112.224	14.0004	104.373
TN2177	3,4,5-trihydroxy-6-{[3-hydroxy-2-(4-hydroxyphenyl)-4-oxo-7-[(3,4,5-trihydroxy-6-methyloxan-2-yl)oxy]-4H-chromen-5-yl]oxy}oxane-2-carboxylic acid	C27H28O16	HMDB0126556	40.096	59.2965	60.9046	88.8849	35.1505	64.4476	44.7452	79.5842	71.2566	143.977	79.3941	73.5212	9.67395	114.062	105.299	86.8234	70.7616	72.2247	53.7942	102.004	37.9557	139.72	37.8773	64.7627	80.4347	60.1617	61.6696	38.2843	56.6677	100.857	26.7099	46.9166
TN1342	3,4,5-trihydroxy-6-{[4-oxo-1-(5,6,7-trimethoxy-4-oxo-4H-chromen-2-yl)cyclohexa-2,5-dien-1-yl]oxy}oxane-2-carboxylic acid	C24H24O13	HMDB0128593	26.6675	189.365	261.896	189.497	64.6365	22.9292	161.754	144.256	30.1811	347.592	256.119	74.2985	39.9734	348.827	174.416	52.1926	6.49343	2.54134	5.03906	269.682	97.5835	187.81	26.8102	76.6109	6.29741	4.65393	5.88457	16.005	6.85125	134.47	19.8769	155.118
TN2587	3,4,5-trihydroxy-6-{[5-hydroxy-2-(3-hydroxyphenyl)-3-[(3,4,5-trihydroxyoxan-2-yl)oxy]-5H-chromen-7-yl]oxy}oxane-2-carboxylic acid	C26H27O15	HMDB0127922	18.4921	442.066	333.866	162.002	21.0614	17.2032	65.5172	78.7699	18.5903	2203.69	524.259	22.2664	15.5027	786.975	115.136	26.7361	15.2583	16.9879	12.8121	394.669	41.9441	1881.21	18.2333	33.8409	16.6163	14.5167	12.2195	16.6055	14.9654	55.3542	23.0519	80.9184
RP2284	3,4,5-trihydroxy-6-{[5-hydroxy-2-(4-hydroxyphenyl)-6,8-dimethyl-4-oxo-3,4-dihydro-2H-1-benzopyran-7-yl]oxy}oxane-2-carboxylic acid	C23H24O11	HMDB0130595	13.2714	92.4935	182.682	103.894	38.8071	10.9649	66.3446	45.758	13.449	124.796	169.228	67.5206	81.155	138.792	131.764	33.8033	3.96627	2.06512	2.04902	124.043	87.1683	140.983	18.7182	70.6106	3.85708	2.96939	2.08104	4.3599	3.11855	118.006	16.7297	118.803
TN2377	3,4,5-trihydroxy-6-{[7-hydroxy-2-(3-hydroxy-4-methoxyphenyl)-4-oxo-4H-chromen-6-yl]oxy}oxane-2-carboxylic acid	C22H20O12	HMDB0133322	60.4045	27.2186	93.3947	48.6576	106.311	45.5252	112.791	42.3711	144.084	44.7924	97.2038	29.1702	26.8699	35.3093	155.901	51.9261	60.9212	51.8823	112.329	83.7218	73.8677	69.0801	78.0399	62.4037	54.0723	92.0677	48.083	64.1118	79.8775	48.1783	63.6329	38.1892
RP1887	3,4,5-trihydroxy-6-{[7-methoxy-4-oxo-2-phenyl-8-(3,4,5-trihydroxyoxan-2-yl)-4H-chromen-5-yl]oxy}oxane-2-carboxylic acid	C27H28O14	HMDB0127259	397.824	453.11	1166.1	702.9	395.928	145.721	314.676	69.2878	94.0313	1308.18	495.115	361.486	837.911	532.359	437.484	278.824	46.6239	36.6386	36.0148	1026.95	358.421	212.687	206.086	228.137	48.9434	36.0473	58.703	215.594	317.601	709.959	832.806	809.731
TN811	3,4,5-trihydroxy-6-{[8-(2-hydroxypropan-2-yl)-2-oxo-4-propyl-2H,8H,9H-furo[2,3-h]chromen-5-yl]oxy}oxane-2-carboxylic acid	C23H28O11	HMDB0130128	48.5112	45.3434	42.4184	42.2728	41.7201	40.9953	44.6467	35.4915	39.3943	41.1574	45.4477	41.8524	22.6413	44.2092	43.7728	56.7476	47.1248	52.2503	44.9817	57.5908	48.9364	29.398	48.7449	62.6139	61.3678	55.2819	69.0995	66.9662	49.9758	73.1355	50.8687	43.7049
TN2323	3,4,5-trihydroxy-6-{[8-(2-hydroxypropan-2-yl)-4-(1-hydroxypropyl)-2-oxo-2H,8H,9H-furo[2,3-h]chromen-5-yl]oxy}oxane-2-carboxylic acid	C23H28O12	HMDB0130138	22.7094	49.0946	42.0003	37.8901	31.6678	20.8939	24.8894	25.8844	17.0015	64.1294	39.6838	15.1823	10.6016	40.7535	32.0216	21.0584	17.9452	15.9289	15.6195	46.6696	24.8449	70.7586	23.7909	32.3491	17.6834	19.5172	21.6786	20.3969	20.0198	48.6896	15.2201	43.0477
TN1517	3,4,5-trihydroxy-6-{1-methoxy-1,3-dioxo-3-[(3,4,5,6-tetrahydroxyoxan-2-yl)methoxy]propan-2-yl}oxane-2-carboxylic acid	C16H24O15	HMDB0130025	34.7018	53.092	46.697	35.7086	49.1005	28.0815	48.8091	39.199	21.7245	27.9261	25.6478	27.5317	9.19792	18.6753	23.2058	15.6925	31.6244	27.6345	29.1461	26.683	26.8803	22.4188	40.5575	20.8892	25.8113	25.8905	25.9918	35.2989	20.4799	24.0593	24.3741	21.2565
TN947	3,4,5-trihydroxy-6-{2-hydroxy-5-[(1E)-3-oxo-3-[(3,4,5,6-tetrahydroxyoxan-2-yl)methoxy]prop-1-en-1-yl]phenoxy}oxane-2-carboxylic acid	C21H26O15	HMDB0125185	40.6911	26.2368	44.3601	28.0091	45.0388	26.9598	50.3333	25.5787	45.7344	29.2593	50.7315	26.3904	13.8545	31.8077	49.3225	31.5703	42.1338	37.3865	48.6797	37.7448	45.9345	40.7694	44.924	39.619	40.9572	58.2396	42.6903	48.8888	42.3654	54.7349	49.1318	48.1833
TN1404	3,4,5-trihydroxy-6-{3-[3-(3-hydroxyphenyl)propanoyl]phenoxy}oxane-2-carboxylic acid	C21H22O9	HMDB0135457	83.9379	60.8539	67.2628	61.1416	79.6516	63.5884	75.9075	63.8811	68.3554	66.1893	63.2126	57.2278	79.3763	56.6954	73.7518	55.0118	68.8067	62.2128	70.7105	59.6957	62.9626	54.2956	67.1647	54.3328	64.9083	64.7334	67.105	61.2397	56.1185	78.7419	68.7324	63.2177
TN1723	3,4,5-trihydroxy-6-{3-hydroxy-4-[5-hydroxy-7-methoxy-6-(3-methylbut-1-en-1-yl)-3-(3-methylbut-2-en-1-yl)-4-oxo-4H-chromen-2-yl]phenoxy}oxane-2-carboxylic acid	C32H36O12	HMDB0132648	135.925	20.7108	23.4195	22.8626	18.474	20.1306	60.7522	25.0399	20.3656	26.8399	22.0936	24.4852	2.53486	26.6127	22.5663	22.8289	20.3999	32.4874	14.6353	24.7859	23.0005	22.2787	21.6711	24.1426	33.751	28.348	24.2705	24.2384	118.027	94.4296	83.7795	29.1912
RP1608	3,4,5-trihydroxy-6-{4-[(1E)-3-oxobut-1-en-1-yl]phenoxy}oxane-2-carboxylic acid	C16H18O8	HMDB0133760	477.195	441.618	568.119	534.327	530.395	446.845	490.292	440.532	397.206	422.13	346.686	355.7	361.374	391.039	324.881	360.195	449.876	396.869	434.589	506.863	540.353	375.746	365.125	448.549	399.692	355.091	404.414	270.503	370.257	403.152	380.429	402.431
RP3316	3,4,5-trihydroxy-6-{4-[(2,4,5,6-tetrahydroxy-3-oxo-2,3-dihydro-1-benzofuran-2-yl)methyl]phenoxy}oxane-2-carboxylic acid	C21H20O13	HMDB0133558	25.7448	19.8259	36.1734	45.085	40.9968	33.086	34.7627	28.8663	23.591	52.8283	40.7913	27.9253	33.0895	38.8717	35.817	26.504	28.7851	36.8243	27.0389	39.3045	27.0836	67.5237	41.9317	22.0703	26.602	37.9735	26.5826	27.7279	32.3708	30.8437	37.5593	30.3373
RP419	3,4,5-trihydroxy-6-{4-[1-hydroxy-3-(5-methoxy-2,2-dimethyl-2H-chromen-6-yl)propyl]phenoxy}oxane-2-carboxylic acid	C27H32O10	HMDB0125905	83.2278	58.4519	65.8954	54.1706	70.6484	55.4262	82.2843	64.0701	62.298	72.7531	60.8284	65.2908	54.7116	63.9662	58.0274	83.1343	48.3846	52.6817	37.6633	53.2455	46.6146	31.949	34.4992	42.7884	49.7102	40.0674	38.6264	37.9916	34.1431	43.112	23.3164	47.244
RP2817	3,4,5-trihydroxy-6-{5-methoxy-2-[(2E)-3-phenylprop-2-enoyl]phenoxy}oxane-2-carboxylic acid	C22H22O9	HMDB0135623	30.6831	365.219	390.297	246.361	68.7303	36.5308	164.475	148.584	41.2283	905.254	497.584	53.7634	88.6183	509.807	212.884	68.3839	38.4437	22.0314	28.3202	431.149	149.783	891.528	45.9174	124.094	42.0444	32.2729	22.3368	44.2631	29.8794	183.77	47.1224	229.778
RP2226	3,4,8,9,10-pentahydroxy-6-oxo-6H-benzo[c]chromene-1-carboxylic acid	C14H8O9	HMDB0126633	47.108	51.82	62.908	71.6418	66.8366	58.2131	68.4613	58.8046	66.7795	53.1834	68.3361	67.709	65.3457	71.2053	72.6634	77.3603	78.801	71.553	74.6842	56.5885	60.1793	51.0059	62.0665	71.2838	84.942	73.9348	70.7975	66.8042	77.5466	54.8262	74.7798	64.7828
RP2099	3,4-Dihydro-4-[(5-methyl-2-furanyl)methylene]-2H-pyrrole	C10H11NO	HMDB0040048	224.939	204.002	250.5	252.27	234.109	198.789	248.202	214.374	175.753	221.206	220.282	180.824	187.01	208.856	164.917	183.731	236.488	212.886	214.486	282.868	286.274	237.363	245.175	255.859	265.66	207.809	209.777	201.026	231.131	226.516	256.646	182.678
RP1396	3,4-dihydroxy-5-(3,4,5-trihydroxybenzoyloxy)benzoic acid	C14H10O9	HMDB0128305	71.6333	60.6755	70.3413	81.6279	62.897	69.1583	84.2246	71.1417	68.8019	66.7684	55.7769	67.4415	50.9701	66.0338	77.252	66.6784	80.4799	78.795	69.1338	91.8079	82.3845	81.0734	65.8257	72.9673	79.2973	74.2454	74.2283	86.7817	65.7294	95.7234	96.6089	67.363
RP1504	3,4-dihydroxy-5-[3-hydroxy-4-methoxy-5-(3,4,5-trihydroxybenzoyloxy)benzoyloxy]benzoic acid	C22H16O13	HMDB0128323	34.1913	62.6609	55.6099	50.6377	36.1892	35.1693	59.5259	42.8056	33.8958	74.2984	66.2737	30.294	25.6909	64.5831	51.8304	30.041	27.3945	26.039	30.0533	19.9712	29.0694	74.7553	25.2264	33.1011	34.5394	32.2334	28.922	29.9867	27.1795	46.9759	43.025	45.9369
RP2043	3,4-Hexahydroxydiphenoylarabinose	C19H16O13	HMDB0034113	280.032	221.445	185.061	185.001	240.067	199.435	205.497	189.868	201.275	211.796	215.203	190.136	241.451	124.177	176.11	216.195	295.295	223.279	282.737	248.916	314.47	251.146	233.69	274.079	251.416	199.257	228.699	203.506	292.687	220.324	223.936	277.262
TN2250	3,5,7-Octatriyn-1-ol	C8H6O	HMDB0038998	13.0559	15.3089	16.4746	14.061	15.3702	15.2405	16.6493	14.9279	17.9573	16.897	19.344	14.1344	6.82311	13.1419	17.0681	18.1255	16.3117	12.3632	11.182	14.7572	16.5456	16.2468	17.585	16.1894	17.6483	22.1268	15.7038	15.3396	16.088	22.0651	14.699	17.806
RP1285	3,5,7-trihydroxy-2-(3-hydroxyphenyl)-5H-chromen-5-yl	C15H11O5	HMDB0127929	57.5265	43.5687	36.8152	32.4133	39.4307	21.5427	17.279	15.8913	22.3354	25.488	31.4458	34.0143	49.223	16.4759	34.361	30.6959	28.8126	20.8876	84.7268	28.8828	55.8728	44.4861	51.5298	53.0095	27.8465	32.9023	85.3393	55.8955	46.6076	40.347	51.1376	58.6179
TN2265	3,5,7-trihydroxy-2-(4-hydroxy-3,5-dimethoxyphenyl)-5H-chromen-5-yl	C17H15O7	HMDB0128141	108.89	89.1545	83.1977	79.0913	80.9772	84.4804	100.599	83.9259	91.5611	76.6318	83.0336	76.6314	45.5082	83.401	86.4207	88.2804	71.2882	83.1388	80.0011	69.5208	76.5462	73.6435	86.6812	72.9703	84.5815	90.2492	90.5845	72.6798	87.747	85.8577	88.8582	75.6947
TN1789	3,5-Diiodo-L-tyrosine	C9H9I2NO3	HMDB0003474	46.0745	28.4411	30.0909	27.0531	17.3197	44.8776	37.6135	28.652	39.6897	17.9401	30.6785	35.3578	26.739	16.4004	32.7554	41.178	36.8845	46.942	45.0277	32.5382	37.004	14.9664	38.061	31.6404	38.4863	41.3114	37.625	46.9152	35.2176	31.6167	29.0499	28.604
TN2175	3';,4';,5-Trihydroxy-3-methoxy-6,7-methylenedioxyflavone 4';-glucuronide	C23H20O14	HMDB0037757	59.2425	63.989	47.9547	36.7368	41.3079	38.4398	41.3416	50.517	34.377	44.3952	30.7736	41.2609	49.0208	42.3377	33.752	36.6311	61.254	50.0315	37.4982	58.0494	39.7655	49.7647	52.2962	52.7301	44.8157	39.0098	49.5239	43.951	44.4205	46.0781	36.0151	45.7767
RP2052	3';,5';-Diiodo-L-thyronine 4';-O-sulfate	C15H13I2NO7S	HMDB0060075	17.5771	13.9585	14.0918	13.4132	17.151	18.5187	22.7453	17.2869	14.6942	8.06147	15.3832	18.0177	19.3148	12.5266	19.2724	21.9615	23.2663	21.6441	30.3564	13.7422	15.9823	11.4227	24.8415	20.7313	27.5117	21.5318	16.4069	16.8559	23.3994	14.0374	13.8672	15.4235
TN1968	3';-Azido-3';-deoxy-5';- O-beta-D-glucopyranuronosylthymidine	C16H21N5O10	HMDB0060752	95.6907	175.138	173.674	162.381	86.3816	69.3101	129.92	111.587	99.9022	172.883	181.011	100.966	35.8536	172.067	144.296	107.563	105.019	68.8733	51.9799	167.093	108.399	206.531	89.6029	99.4324	89.549	116.91	88.9703	95.1614	95.4632	126.151	78.0271	118.525
TN580	3-[(1Z)-1-{4-[2-(dimethylamino)ethoxy]phenyl}-2-phenylbut-1-en-1-yl]phenol	C26H29NO2	HMDB0144318	57.8015	49.9587	63.9349	25.7046	117.546	150.745	93.1122	119.133	162.796	82.9317	135.573	164.82	47.9029	101.134	138.575	84.0256	50.9305	84.8268	57.7516	34.3538	37.1112	23.8458	61.2262	34.9052	84.0078	95.5939	99.9448	62.3611	98.7411	91.5012	84.6847	46.2898
RP2340	3-[(5-Methyl-2-furanyl)methyl]-1H-pyrrole	C10H11NO	HMDB0040042	1291.29	1412.9	808.062	872.408	1280.13	1368.91	858.765	911.044	1044.19	838.519	1328.54	824.075	832.426	705.012	1348.86	983.659	713.754	1316.92	968.944	1009.16	794.822	915.405	967.097	869.088	960.444	1029.11	1043.9	1066.9	1209.72	1158.47	1034.75	943.08
TN2189	3-[3,4-dihydroxy-5-(3,4,5-trihydroxybenzoyloxy)benzoyloxy]-5-hydroxy-4-(sulfooxy)benzoic acid	C21H14O16S	HMDB0128322	58.9077	62.032	46.5742	46.9838	49.6225	53.2948	49.0287	55.1575	46.4318	53.1136	43.2099	52.8765	51.7904	47.2055	48.8936	47.0711	52.1414	52.8533	51.633	44.8397	52.1224	54.1095	52.8022	56.2994	47.4732	42.5667	46.7326	47.1003	47.4501	39.0585	52.0954	49.5091
RP2519	3-[3,4-dihydroxy-5-(3-methylbut-2-en-1-yl)phenyl]prop-2-enoic acid	C14H16O4	HMDB0135894	49.1997	34.4207	45.6549	51.236	41.2834	40.3456	39.5756	37.4317	46.92	35.6459	52.7054	64.5751	61.2926	38.7858	37.3412	44.9705	54.4908	75.9159	55.4291	34.3698	43.0444	48.7101	74.1476	59.0685	45.3565	45.8592	53.7764	25.4945	42.3198	45.6073	50.8274	49.8887
RP2510	3-[3-methoxy-4-(sulfooxy)phenyl]oxirane-2-carboxylic acid	C10H10O8S	HMDB0127977	65.5601	59.862	78.5246	63.4643	67.5906	70.8215	79.5746	106.951	62.8977	128.497	80.7565	68.4182	70.479	58.7768	58.4788	61.3115	56.6919	60.3995	58.7787	147.785	79.8872	52.3662	63.2632	81.0644	61.1544	56.1232	64.6202	46.2162	84.8518	85.5828	77.7279	97.6431
RP1894	3-[4-Hydroxy-3-(3-methyl-2-butenyl)phenyl]-2-propenal	C14H16O2	HMDB0040833	34.537	26.5605	28.2992	29.6339	23.9955	23.2004	51.56	24.9051	32.9953	30.8758	28.2906	34.9474	33.7593	41.2338	29.5481	30.3116	26.8075	25.3449	36.3621	26.3274	31.9805	24.2776	23.5855	27.4659	34.5176	22.9432	32.4637	22.9944	125.831	129.826	133.213	105.635
TN93	3-[4-hydroxy-3-(4-hydroxy-3-methylbut-2-en-1-yl)phenyl]prop-2-enoic acid	C14H16O4	HMDB0135890	45.6614	44.39	38.3511	40.6622	39.2754	39.4428	41.1985	37.7164	39.9753	37.7119	38.1982	36.9149	36.0028	33.9127	33.4566	30.9537	26.3485	26.8326	26.1359	26.8692	25.444	25.6863	27.7902	25.9925	27.4216	27.3282	28.1944	24.5498	26.4418	29.9861	26.9595	26.406
RP2809	3-{3-[3,5-dihydroxy-4-(sulfooxy)benzoyloxy]-4,5-dihydroxybenzoyloxy}-2,4,5-trihydroxybenzoic acid	C21H14O17S	HMDB0128343	21.4672	78.4354	26.1783	24.3383	18.5367	16.1467	28.1241	16.678	17.4748	24.0492	37.1499	12.472	23.5101	25.5684	17.6372	12.9582	17.1025	21.9839	17.6998	13.6751	20.9053	25.5699	20.6134	18.3394	23.8165	20.4361	18.4179	19.74	18.1503	12.9399	17.1617	27.2498
TN1907	3-{7-[(6-carboxy-3,4,5-trihydroxyoxan-2-yl)oxy]-3-hydroxy-5-sulfino-3,4-dihydro-2H-1-benzopyran-2-yl}benzen-1-olate	C21H22O12S	HMDB0127814	18.4849	79.8584	66.0814	100.466	49.2918	15.7448	70.2188	55.7419	46.8379	89.7382	209.329	36.339	24.5904	109.143	100.687	73.3122	110.941	17.5702	11.1273	51.8014	107.807	162.06	50.1793	37.0523	91.333	96.3996	30.6215	136.166	16.7651	84.9632	62.6054	39.4003
TN2193	3-Dechloroethylifosfamide	C5H12ClN2O2P	HMDB0013858	220.667	219.536	201.557	203.524	198.573	206.916	209.818	203.489	208.296	205.066	192.118	201.641	204.918	191.21	197.788	187.418	183.755	205.238	199.307	207.869	198.592	202.014	194.093	193.269	172.666	205.9	192.183	197.158	206.671	200.521	229.659	214.544
[truncated: 333 more rows]
