# Supplementary material for: Structural characterization ofPoria cocosoligosaccharides and their effects on the hepatic metabolome in high-fat diet-fed mice
Source: Royal Society of Chemistry journal article supplement (doi:10.1039/d2fo00638c), 2022-01-01
Supplement: d2fo00638c3.xlsx [file d2fo00638c3.xlsx]

## Sheet: Pathway impact (NCD vs HFD)
Supplementary Table 4. List of KEGG pathways related to metabolic changes in liver tissues of mice between NCD and HFD groups by HPLC-MS/MS analysis
KEGG Pathway	metabolite number	Expected	Hits	Raw p	LOG(p)	Holm adjust	FDR	Impact
Phenylalanine, tyrosine and tryptophan biosynthesis	4	0.67995	2	0.13635	0.86533	1	1	1
Phosphonate and phosphinate metabolism	6	1.0199	2	0.27112	0.56683	1	1	1
Nicotinate and nicotinamide metabolism	15	2.5498	4	0.24218	0.61585	1	1	0.43641
Glycerophospholipid metabolism	36	6.1195	7	0.41419	0.3828	1	1	0.382
Phenylalanine metabolism	12	2.0398	3	0.33424	0.47595	1	1	0.35714
alpha-Linolenic acid metabolism	13	2.2098	3	0.38475	0.41482	1	1	0.33333
Pyrimidine metabolism	39	6.6295	5	0.81956	0.086418	1	1	0.29147
Pentose and glucuronate interconversions	18	3.0598	2	0.83784	0.076838	1	1	0.26562
Ascorbate and aldarate metabolism	10	1.6999	1	0.84577	0.07275	1	1	0.25
Retinol metabolism	16	2.7198	2	0.78454	0.10538	1	1	0.22754
Glycine, serine and threonine metabolism	34	5.7795	2	0.98662	0.0058503	1	1	0.20661
Lipoic acid metabolism	8	1.3599	1	0.7756	0.11036	1	1	0.16667
Aminoacyl-tRNA biosynthesis	48	8.1594	3	0.99307	0.0030195	1	1	0.16667
Steroid hormone biosynthesis	77	13.089	7	0.98565	0.0062776	1	1	0.16042
Tyrosine metabolism	42	7.1394	2	0.99649	0.001526	1	1	0.13972
Pentose phosphate pathway	22	3.7397	1	0.98393	0.0070369	1	1	0.11955
Purine metabolism	66	11.219	5	0.99292	0.0030853	1	1	0.11923
Steroid biosynthesis	42	7.1394	3	0.98287	0.0075037	1	1	0.11142
Drug metabolism - other enzymes	38	6.4595	1	0.99924	0.00033181	1	1	0.07353
Cysteine and methionine metabolism	33	5.6096	2	0.98423	0.0069016	1	1	0.05698
Pantothenate and CoA biosynthesis	19	3.2297	2	0.85976	0.065621	1	1	0.05357
Lysine degradation	25	4.2497	2	0.94338	0.025315	1	1	0.04695
Glyoxylate and dicarboxylate metabolism	32	5.4396	1	0.9976	0.0010454	1	1	0.04233
Sphingolipid metabolism	21	3.5697	4	0.49028	0.30956	1	1	0.03854
Primary bile acid biosynthesis	46	7.8194	1	0.99984	7.132e-05	1	1	0.02285
Alanine, aspartate and glutamate metabolism	28	4.7596	1	0.99485	0.0022421	1	1	0.02163
Arachidonic acid metabolism	36	6.1195	4	0.88547	0.052827	1	1	0.0212
Fatty acid biosynthesis	47	7.9894	1	0.99986	5.8814e-05	1	1	0.01473
Glycerolipid metabolism	16	2.7198	1	0.95009	0.022237	1	1	0.01246
Arginine and proline metabolism	38	6.4595	2	0.99311	0.003002	1	1	0.01212
Glycosylphosphatidylinositol (GPI)-anchor biosynthesis	14	2.3798	1	0.92726	0.032799	1	1	0.00399
Phosphatidylinositol signaling system	28	4.7596	1	0.99485	0.0022421	1	1	0.00152

## Sheet: Pathway impact (HFD vs HFD+PCO)
Supplementary Table 5. List of KEGG pathways related to metabolic changes in liver tissues of mice between HFD and HFD+PCO groups by HPLC-MS/MS analysis
KEGG Pathway	metabolite number	Expected	Hits	Raw p	LOG(p)	Holm adjust	FDR	Impact
Phenylalanine, tyrosine and tryptophan biosynthesis	4	0.68792	2	0.13916	0.85647	1	1	1
Phosphonate and phosphinate metabolism	6	1.0319	2	0.27596	0.55916	1	1	1
Glycerophospholipid metabolism	36	6.1912	6	0.60429	0.21875	1	1	0.40623
Phenylalanine metabolism	12	2.0637	2	0.63826	0.195	1	1	0.35714
Fatty acid elongation	39	6.7072	3	0.97523	0.010892	1	1	0.31
Tyrosine metabolism	42	7.2231	2	0.99679	0.0013946	1	1	0.25057
Nicotinate and nicotinamide metabolism	15	2.5797	2	0.75877	0.11989	1	1	0.24211
Pantothenate and CoA biosynthesis	19	3.2676	3	0.65995	0.18049	1	1	0.23928
Glycine, serine and threonine metabolism	34	5.8473	4	0.86256	0.064211	1	1	0.2331
Pentose phosphate pathway	22	3.7835	2	0.91394	0.039082	1	1	0.21798
Fatty acid degradation	39	6.7072	3	0.97523	0.010892	1	1	0.20687
Selenocompound metabolism	20	3.4396	2	0.88336	0.053864	1	1	0.20454
Glycolysis / Gluconeogenesis	26	4.4714	3	0.85125	0.069942	1	1	0.17182
Aminoacyl-tRNA biosynthesis	48	8.255	3	0.99368	0.0027533	1	1	0.16667
Pyruvate metabolism	22	3.7835	1	0.98476	0.0066687	1	1	0.15397
Biotin metabolism	10	1.7198	1	0.84944	0.070867	1	1	0.15
Pyrimidine metabolism	39	6.7072	3	0.97523	0.010892	1	1	0.14275
Terpenoid backbone biosynthesis	18	3.0956	3	0.62173	0.2064	1	1	0.13968
Starch and sucrose metabolism	15	2.5797	1	0.94188	0.026002	1	1	0.08784
Purine metabolism	66	11.351	3	0.99966	0.0001471	1	1	0.08606
Steroid hormone biosynthesis	77	13.242	4	0.9997	0.00013136	1	1	0.0845
Steroid biosynthesis	42	7.2231	2	0.99679	0.0013946	1	1	0.08391
Sphingolipid metabolism	21	3.6116	7	0.05423	1.2658	1	1	0.08114
Vitamin B6 metabolism	9	1.5478	2	0.47543	0.32292	1	1	0.07843
Porphyrin and chlorophyll metabolism	30	5.1594	1	0.99673	0.0014233	1	1	0.07465
Drug metabolism - other enzymes	38	6.5352	2	0.99364	0.0027702	1	1	0.07353
beta-Alanine metabolism	21	3.6116	1	0.98154	0.0080908	1	1	0.05597
Tryptophan metabolism	41	7.0511	2	0.99619	0.001657	1	1	0.05157
Glyoxylate and dicarboxylate metabolism	32	5.5033	2	0.98262	0.0076158	1	1	0.05027
Citrate cycle (TCA cycle)	20	3.4396	1	0.97765	0.009818	1	1	0.03668
Fructose and mannose metabolism	18	3.0956	1	0.96723	0.014471	1	1	0.03382
Valine, leucine and isoleucine degradation	40	6.8792	1	0.99953	0.00020507	1	1	0.02836
Arginine and proline metabolism	38	6.5352	1	0.9993	0.00030242	1	1	0.02346
Cysteine and methionine metabolism	33	5.6753	2	0.98527	0.0064446	1	1	0.02184
Fatty acid biosynthesis	47	8.083	2	0.99866	0.0005841	1	1	0.01686
Propanoate metabolism	23	3.9555	1	0.98742	0.0054975	1	1	0.01269
Glycerolipid metabolism	16	2.7517	1	0.95198	0.021372	1	1	0.01246
Glycosylphosphatidylinositol (GPI)-anchor biosynthesis	14	2.4077	1	0.92968	0.031668	1	1	0.00399
Phosphatidylinositol signaling system	28	4.8154	1	0.99519	0.0020943	1	1	0.00152
