# Supplementary material for: Structural characterization ofPoria cocosoligosaccharides and their effects on the hepatic metabolome in high-fat diet-fed mice
Source: Royal Society of Chemistry journal article supplement (doi:10.1039/d2fo00638c), 2022-01-01
Supplement: d2fo00638c4.pdf [file d2fo00638c4.pdf]

## Supplementary data

### Supplementary Methods

1. HPLC analysis and polymerization degree identification of PCO.
2. Methylation analysis of PCO by GC-MS.

### Supplementary Figures

Fig. 1. FT-IR spectrum of PCO.

Fig. 2. PLS-DA score space and permutation tests of PLS-DA models.

### Supplementary Tables

Table 1. Composition of normal chow diet (NCD) and high-fat diet (HFD).

Table 2. List of primer sequences for RT-PCR analysis.

Table 3. List of detected metabolites in liver tissues of mice from four experimental groups by HPLC-MS/MS analysis.

Table 4. List of efficient metabolites in liver tissues of mice from four experimental groups by HPLC-MS/MS analysis.

Table 5. List of KEGG pathways related to metabolic changes in liver tissues of mice from four experimental groups by HPLC-MS/MS analysis.

## Supplementary Methods

### 1. HPLC analysis and polymerization degree identification of PCO

The HPLC analysis of PCO was performed on the Waters 1525 HPLC system coupled with RID. X-Amide column (5  $\mu\text{m}$ , 4.6 mm  $\times$  150 mm, ACCHROM, China) maintained at 35  $^{\circ}\text{C}$ . The mobile phase contained acetonitrile (A) and water (B) at a flow rate of 1 mL/min, and separation was achieved using the following gradient: 0–30 min, 82% to 60% A; 30–35 min, 60% A; 35–40 min, 60% to 82% A; 40–50 min, 82% A.

To identify the polymerization degree of PCO, we performed HPLC-MS analysis on an ultra-high performance liquid chromatography system (SCIEX, Framingham, MA, USA) with an Agilent Poroshell Hilic column (2.1  $\times$  100 mm, 2.7  $\mu\text{m}$ ) (Santa Clara, CA, USA) fitted with a Triple TOF 4600 high-resolution mass spectrometry system (SCIEX, Framingham, MA, USA). The mobile phase was composed of 0.1% aqueous formic acid (A) and acetonitrile (B). The gradient elution was performed as follows: 0–1 min, 100% B; 1–2 min, 100% to 85% B; 2–32 min, 85% to 50% B; 32–33 min, 50% to 20% B; 33–37 min, 20% to 85% B; 37–44 min, 85% B. The injection volume was 10  $\mu\text{L}$ , and the flow rate was 0.03 mL/min. The ESI source in positive ion mode was used with resolving power 30,000 and a scan range of  $m/z$  100-1000. The parameters were set as follows: capillary temperature, 600  $^{\circ}\text{C}$ ; ion spray voltage, 5.5 kV in positive ion mode; sheath and auxiliary gas flow rate, 55 psi; collision energy, 35 eV.

### 2. Methylation analysis of PCO by GC-MS

The methylated PCO was analyzed by Agilent GC/MS 5975 (Agilent, CA, USA) equipped with a DB-5MS capillary column (30 m  $\times$  0.32 mm  $\times$  0.5  $\mu\text{m}$ ) (Agilent, CA, USA) with He as the carrier gas (1 mL/min). The oven temperature of column was programmed as follows: 0–16 min, 100  $^{\circ}\text{C}$  to 180  $^{\circ}\text{C}$  at 5  $^{\circ}\text{C}/\text{min}$ ; 16–17 min, 180  $^{\circ}\text{C}$ ; 17–27 min, 180  $^{\circ}\text{C}$  to 190  $^{\circ}\text{C}$  at 1  $^{\circ}\text{C}/\text{min}$ ; 27–29 min, 190  $^{\circ}\text{C}$ ; 29–30 min, 190  $^{\circ}\text{C}$  to 220  $^{\circ}\text{C}$  at 30  $^{\circ}\text{C}/\text{min}$ ; 30–32 min, 220  $^{\circ}\text{C}$ ; 32–42 min, 220  $^{\circ}\text{C}$  to 230  $^{\circ}\text{C}$  at 1  $^{\circ}\text{C}/\text{min}$ ;

42–44 min, 230 °C; 44–46.5 min, 230 °C to 280 °C at 20 °C/min; 46.5–56.5 min, 280 °C. The mass spectrometer was operated with an electron impact (EI) source in full scan mode. The electron energy was 70 eV, and the transfer line temperature was set at 250 °C. The data were collected in the range of  $m/z$  50 to  $m/z$  1500.

## Supplementary Figures

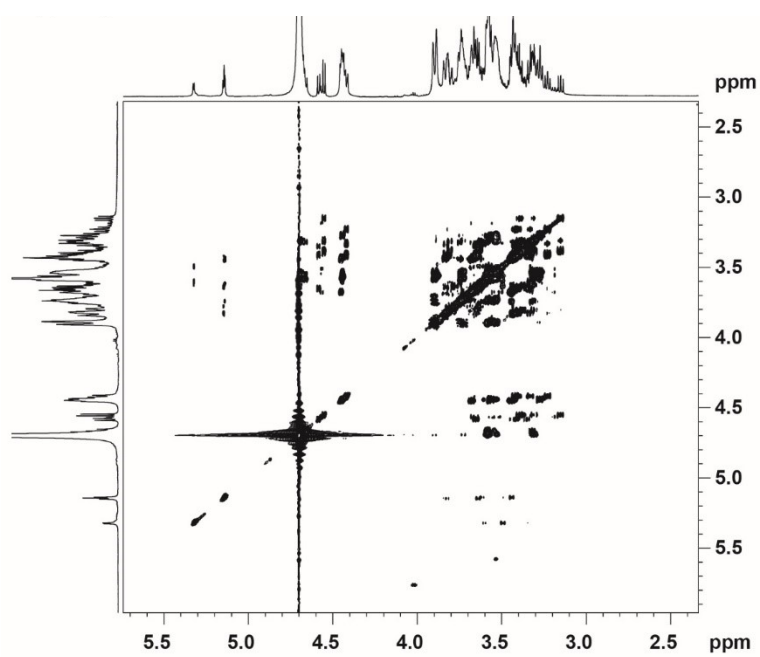

Fig. 1.  $^1\text{H}$ - $^1\text{H}$  TCOSY NMR spectrum of PCO.

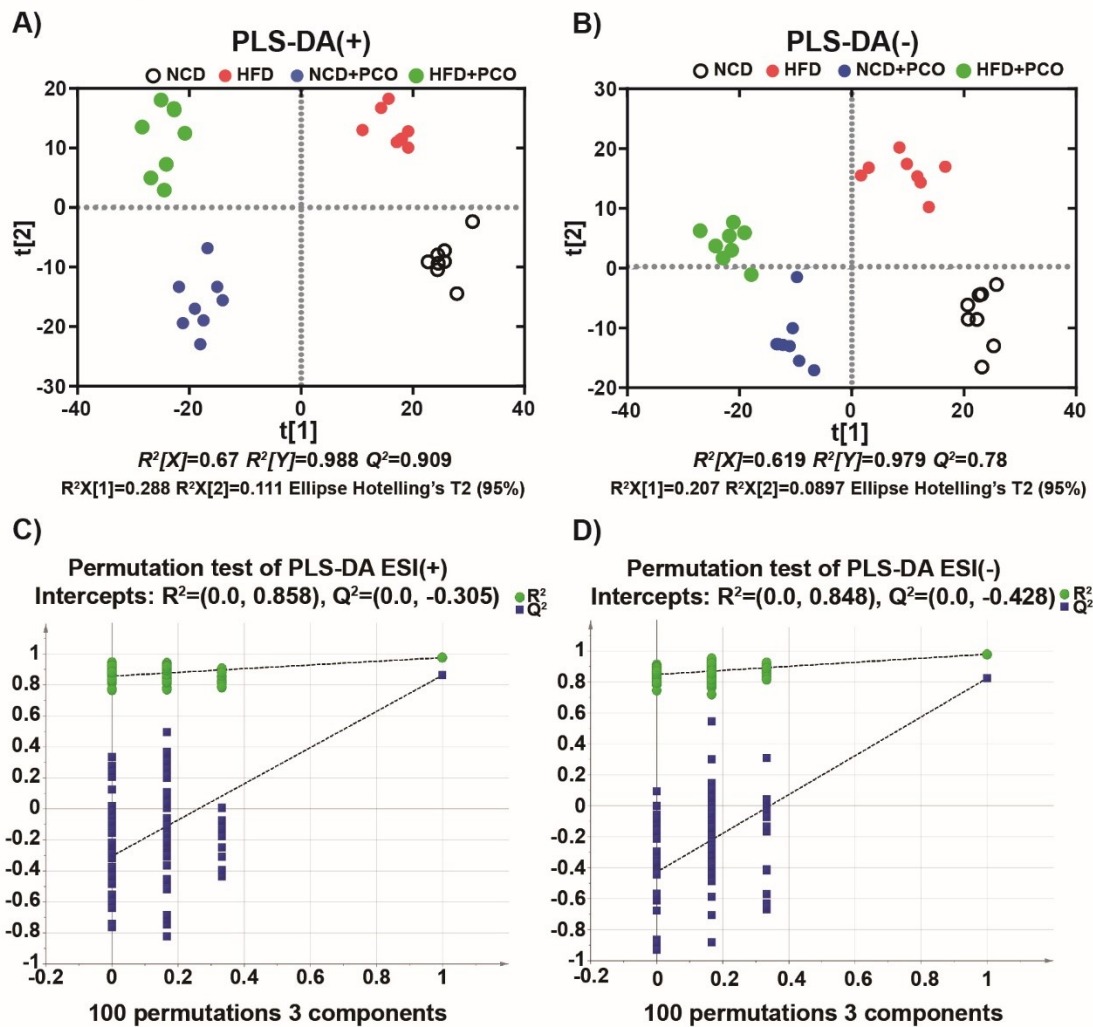

Fig. 2. PLS-DA score space and permutation test of PLS-DA models by 100 iterations. (A–B) Score plots showing group separation in PLS-DA of ESI(+) and ESI(-) ion modes. (C–D) Permutations test of PLS-DA models by 100 iterations.  $Q^2=(0.0, -0.305)$  in ESI(+) ion mode,  $Q^2=(0.0, -0.428)$  in ESI(-) ion mode. Both intercepts of  $Q^2$  indicate a valid model.

## Supplementary Tables

Table 1. Composition of normal chow diet (NCD) and high-fat diet (HFD)

| Composition          | Normal chow diet |      | High-fat diet |      |
|----------------------|------------------|------|---------------|------|
|                      | Gram             | Kcal | Gram          | Kcal |
| Casein, 80 Mesh      | 200              | 800  | 200           | 800  |
| L-Cystine            | 3                | 12   | 3             | 12   |
| Corn Starch          | 315              | 1260 | 72.8          | 291  |
| Maltodextrin 10      | 35               | 140  | 100           | 400  |
| Sucrose              | 350              | 1400 | 172.8         | 691  |
| Cellulose, BW200     | 50               | 0    | 50            | 0    |
| Soybean Oil          | 25               | 225  | 25            | 225  |
| Lard                 | 20               | 180  | 177.5         | 1598 |
| Mineral Mix S10026   | 10               | 0    | 10            | 0    |
| DiCalcium Phosphate  | 13               | 0    | 13            | 0    |
| Calcium Carbonate    | 5.5              | 0    | 5.5           | 0    |
| Potassium Citrate, 1 | 16.5             | 0    | 16.5          | 0    |
| Vitamin Mix V10001   | 10               | 40   | 10            | 40   |
| Choline Bitartrate   | 2                | 0    | 2             | 0    |
| FD&C Red Dye #40     | 0.05             | 0    | 0.05          | 0    |

Table 2. List of primer sequences for RT-PCR analysis

| Name          | Forward primer (5'-3')    | Reverse primer (5'-3')   |
|---------------|---------------------------|--------------------------|
| ABCG1         | GTGGATGAGGTTGAGACAGACC    | CCTCGGGTACAGAGTAGGAAAG   |
| ACC1          | AAGTCCTTGGTCGGGAAGTATACA  | ACTCCCTCAAAGTCATCACAAACA |
| CYP27A1       | CACTTCCTGCTGACCAATGA      | CAGTGTGTTGGATGTCGTGTC    |
| CYP7A1        | AAACTCCCTGTCATACCACAAAG   | TTCCATCACTGGGTCTATGC     |
| CYP8B1        | CCTCTGGACAAGGGTTTTGTG     | GCACCGTGAAGACATCCCC      |
| FASN          | AGGTGGTGATAGCCGGTATGT     | TGGGTAATCCATAGAGCCCAG    |
| IL-1 $\beta$  | GGCTGGACTGTTTCTAATGC      | ATGGTTTCTTGTGACCCTGA     |
| IL-6          | GAAACCGCTATGAAGTTCCTCTCTG | TGTTGGGAGTGGTATCCTCTGTGA |
| Pepck         | CTGCATAACGGTCTGGACTTC     | CAGCAACTGCCCCGTA CTCC    |
| SREBP-1       | GCATGCCATGGGCAAGTAC       | CCACATAGATCTCTGCCAGTGTTG |
| TNF- $\alpha$ | GGGTGTTTCATCCATTCTC       | GGAAAGCCCATTGAGT         |
| FADS1         | CGCCAAACGCGCTACTTTAC      | CGGTCGATCACGAGCCATC      |
| FADS2         | TCATCGGACACTATTCGGGAG     | GGGCCAGCTACCAATCAG       |
| GAPDH         | AGGTCGGTGTGAACGGATTTG     | TGTAGACCATGTAGTTGAGGTCA  |

Table 3. List of detected metabolites in liver tissues of mice from four experimental groups by HPLC-MS/MS analysis. Please see the EXCEL file “Suppl Table 3-Lin Zhu”.

Table 4. List of efficient metabolites in liver tissues of mice from four experimental groups by HPLC-MS/MS analysis. Please see the EXCEL file “Suppl Table 4-Lin Zhu”.

Table 5. List of KEGG pathways related to metabolic changes in liver tissues of mice from four experimental groups by HPLC-MS/MS analysis. Please see the EXCEL file “Suppl Table 5-Lin Zhu”.
